# Supplementary material for: Early life infection and proinflammatory, atherogenic metabolomic and lipidomic profiles in infancy: a population-based cohort study
Source: eLife. 2022 May 10;11:e75170. doi: 10.7554/eLife.75170 (PMC9090335; doi:10.7554/eLife.75170)
Supplement: Figure 3—source data 2. [file elife-75170-fig3-data2.xlsx]

## Sheet: Figure 3 - Source Data 2
Figure 3 - Source Data 2. Summary of regression models for difference in 6-month NMR metabolomic measures per 1 increase in parent-reported infection from birth to 6 months of age or per SD increase in 6-month log GlycA.
		Parent reported infections from birth to 6 months						6-month GlycA
Measure	Description	Estimate (β)	95% Confidence Interval	P-value	Adj. P-value	Bootstrap Estimate	Bootstrap 95% Confidence Interval	Estimate (β)	95% Confidence Interval	P-value	Adj. P-value	Bootstrap Estimate	Bootstrap 95% Confidence Interval
Total-C	Total cholesterol	-0.0289993	-0.079 to 0.021	0.254241	0.947943	-0.0289365	-0.075 to 0.019	-0.0638338	-0.153 to 0.026	0.162824	0.213973	-0.0649576	-0.155 to 0.043
non-HDL-C	Total cholesterol minus HDL-C	-0.0102898	-0.06 to 0.039	0.685585	0.947943	-0.0104571	-0.062 to 0.035	0.040248	-0.049 to 0.13	0.378519	0.435817	0.0395934	-0.064 to 0.132
Remnant-C	Remnant cholesterol (non-HDL, non-LDL -cholesterol)	-0.00711448	-0.057 to 0.042	0.777862	0.947943	-0.00725799	-0.049 to 0.041	0.119316	0.031 to 0.208	0.00829754	0.0128561	0.121126	0.017 to 0.203
VLDL-C	VLDL cholesterol	0.00688799	-0.042 to 0.056	0.783124	0.947943	0.00728374	-0.036 to 0.049	0.261805	0.177 to 0.347	3.14779e-09	1.0261e-08	0.260339	0.16 to 0.349
Clinical LDL-C	Clinical LDL cholesterol	-0.00911926	-0.059 to 0.041	0.721391	0.947943	-0.00984024	-0.052 to 0.037	-0.0455261	-0.136 to 0.045	0.32211	0.381366	-0.044331	-0.166 to 0.043
LDL-C	LDL cholesterol	-0.011658	-0.062 to 0.039	0.649314	0.947943	-0.0122247	-0.057 to 0.033	-0.0329972	-0.123 to 0.057	0.474232	0.519791	-0.0310728	-0.148 to 0.052
HDL-C	HDL cholesterol	-0.0580825	-0.108 to -0.009	0.0220603	0.307618	-0.0606131	-0.106 to -0.015	-0.290818	-0.377 to -0.205	8.21342e-11	4.04229e-10	-0.291458	-0.382 to -0.192
Total triglycerides	Total triglycerides	-0.0121589	-0.059 to 0.034	0.609426	0.947943	-0.0120962	-0.058 to 0.033	0.290366	0.211 to 0.37	3.5183e-12	2.15388e-11	0.291318	0.197 to 0.377
VLDL-TG	Triglycerides in VLDL	-0.00469389	-0.05 to 0.041	0.840779	0.94825	-0.00408298	-0.046 to 0.038	0.268406	0.19 to 0.347	6.56839e-11	3.36462e-10	0.273309	0.179 to 0.354
LDL-TG	Triglycerides in LDL	-0.0191637	-0.068 to 0.03	0.440737	0.947943	-0.0199545	-0.067 to 0.033	0.323154	0.24 to 0.406	1.03364e-13	9.26581e-13	0.32188	0.228 to 0.427
HDL-TG	Triglycerides in HDL	-0.0385412	-0.088 to 0.011	0.126137	0.719404	-0.0380246	-0.095 to 0.011	0.174007	0.086 to 0.262	0.000111355	0.000220079	0.172639	0.084 to 0.27
Total-PL	Total phospholipids in lipoprotein particles	-0.0486912	-0.099 to 0.001	0.0561049	0.485598	-0.0498947	-0.094 to -0.007	-0.0422873	-0.132 to 0.048	0.357096	0.414959	-0.0408746	-0.153 to 0.056
VLDL-PL	Phospholipids in VLDL	0.00152435	-0.047 to 0.05	0.950577	0.981872	0.00185084	-0.04 to 0.045	0.306644	0.224 to 0.389	1.10015e-12	8.12172e-12	0.307164	0.216 to 0.397
LDL-PL	Phospholipids in LDL	-0.0114873	-0.061 to 0.038	0.651308	0.947943	-0.0113297	-0.064 to 0.034	0.0156864	-0.074 to 0.105	0.731542	0.774755	0.0165933	-0.083 to 0.114
HDL-PL	Phospholipids in HDL	-0.0652908	-0.115 to -0.015	0.0108887	0.208936	-0.0666423	-0.112 to -0.022	-0.232647	-0.321 to -0.144	3.47652e-07	8.72607e-07	-0.230117	-0.329 to -0.14
Total-CE	Total esterified cholesterol	-0.0308782	-0.081 to 0.019	0.225209	0.947943	-0.0326329	-0.078 to 0.013	-0.0915111	-0.181 to -0.002	0.0454141	0.0629776	-0.0926037	-0.19 to 0.002
VLDL-CE	Cholesteryl esters in VLDL	0.00938412	-0.04 to 0.059	0.708252	0.947943	0.0116243	-0.039 to 0.054	0.241467	0.156 to 0.327	5.44691e-08	1.48606e-07	0.245254	0.148 to 0.329
LDL-CE	Cholesteryl esters in LDL	-0.0114867	-0.062 to 0.039	0.654948	0.947943	-0.0126097	-0.051 to 0.036	-0.0180208	-0.109 to 0.073	0.696718	0.741755	-0.0173738	-0.16 to 0.069
HDL-CE	Cholesteryl esters in HDL	-0.0582109	-0.108 to -0.009	0.0215828	0.307618	-0.0604371	-0.109 to -0.016	-0.314071	-0.399 to -0.229	1.74587e-12	1.21726e-11	-0.313718	-0.406 to -0.216
Total-FC	Total free cholesterol	-0.0234151	-0.073 to 0.026	0.355577	0.947943	-0.0238148	-0.071 to 0.016	0.0103331	-0.079 to 0.1	0.820776	0.854833	0.0110419	-0.082 to 0.106
VLDL-FC	Free cholesterol in VLDL	0.00391337	-0.045 to 0.052	0.874351	0.950041	0.00385551	-0.041 to 0.053	0.278939	0.195 to 0.362	1.53514e-10	7.00583e-10	0.280476	0.186 to 0.38
LDL-FC	Free cholesterol in LDL	-0.0108796	-0.061 to 0.039	0.669192	0.947943	-0.0107894	-0.062 to 0.032	-0.0847387	-0.174 to 0.005	0.0638562	0.0871082	-0.0851699	-0.191 to 0
HDL-FC	Free cholesterol in HDL	-0.0548035	-0.105 to -0.005	0.0312911	0.341482	-0.0551257	-0.106 to -0.011	-0.196029	-0.284 to -0.108	1.60705e-05	3.56965e-05	-0.194684	-0.292 to -0.094
Total-L	Total lipids in lipoprotein particles	-0.0369567	-0.087 to 0.013	0.145095	0.748384	-0.0387787	-0.084 to 0.008	0.0399557	-0.049 to 0.129	0.381502	0.437247	0.0410853	-0.084 to 0.137
VLDL-L	Total lipids in VLDL	-0.00172011	-0.049 to 0.046	0.943347	0.981872	-0.00219337	-0.046 to 0.043	0.28945	0.208 to 0.371	9.6915e-12	5.65713e-11	0.291687	0.195 to 0.377
LDL-L	Total lipids in LDL	-0.0128732	-0.063 to 0.037	0.61369	0.947943	-0.0137495	-0.058 to 0.031	0.00460145	-0.085 to 0.094	0.920107	0.937185	0.00514729	-0.105 to 0.099
HDL-L	Total lipids in HDL	-0.0641269	-0.114 to -0.014	0.0121385	0.208936	-0.0652854	-0.111 to -0.015	-0.246413	-0.334 to -0.159	5.8605e-08	1.5817e-07	-0.247105	-0.332 to -0.149
Total-P	Total concentration of lipoprotein particles	-0.0641697	-0.114 to -0.014	0.0122923	0.208936	-0.0654002	-0.108 to -0.02	-0.264129	-0.352 to -0.177	6.1728e-09	1.88948e-08	-0.265446	-0.355 to -0.167
VLDL-P	Concentration of VLDL particles	0.00585203	-0.043 to 0.054	0.812812	0.947943	0.00658999	-0.042 to 0.049	0.305204	0.223 to 0.388	1.84405e-12	1.25096e-11	0.301735	0.212 to 0.405
LDL-P	Concentration of LDL particles	0.000880922	-0.048 to 0.05	0.972093	0.995899	0.000751551	-0.047 to 0.042	0.138917	0.051 to 0.227	0.00205428	0.00350764	0.137704	0.048 to 0.242
HDL-P	Concentration of HDL particles	-0.0669625	-0.117 to -0.017	0.00894239	0.208936	-0.0681878	-0.114 to -0.023	-0.295401	-0.382 to -0.209	6.47178e-11	3.36462e-10	-0.295774	-0.391 to -0.199
VLDL particle size	Average diameter for VLDL particles	-0.0114501	-0.057 to 0.034	0.619905	0.947943	-0.0107217	-0.05 to 0.03	0.165831	0.086 to 0.246	5.64835e-05	0.000116208	0.166501	0.084 to 0.255
LDL particle size	Average diameter for LDL particles	0.00780671	-0.042 to 0.057	0.756814	0.947943	0.00748515	-0.038 to 0.05	0.0330068	-0.056 to 0.122	0.466599	0.515931	0.0313747	-0.073 to 0.132
HDL particle size	Average diameter for HDL particles	-0.0350174	-0.085 to 0.015	0.16728	0.839745	-0.0343223	-0.081 to 0.016	-0.126009	-0.215 to -0.037	0.00558744	0.00899004	-0.128068	-0.219 to -0.032
Phosphoglycerides	Phosphoglycerides	-0.0520551	-0.102 to -0.002	0.0417667	0.40476	-0.0524838	-0.098 to -0.01	-0.0617818	-0.152 to 0.029	0.180685	0.232574	-0.0588068	-0.17 to 0.043
TG/PG	Ratio of triglycerides to phosphoglycerides	0.0170176	-0.029 to 0.063	0.470608	0.947943	0.0174296	-0.026 to 0.063	0.352469	0.275 to 0.429	7.02287e-18	2.20343e-16	0.352445	0.273 to 0.44
Total cholines	Total cholines	-0.0498543	-0.1 to 0	0.051427	0.47808	-0.0511809	-0.097 to -0.009	-0.0674145	-0.158 to 0.023	0.144337	0.192705	-0.0680644	-0.163 to 0.029
Phosphatidylcholines	Phosphatidylcholines	-0.0558623	-0.106 to -0.006	0.0287937	0.341482	-0.0560701	-0.101 to -0.007	-0.108228	-0.198 to -0.018	0.0187461	0.027678	-0.106845	-0.216 to -0.01
Sphingomyelins	Sphingomyelins	-0.0171873	-0.066 to 0.032	0.49167	0.947943	-0.0166902	-0.064 to 0.023	0.0456558	-0.043 to 0.134	0.310789	0.371467	0.0430727	-0.037 to 0.135
ApoB	Apolipoprotein B	0.00165129	-0.048 to 0.051	0.947703	0.981872	0.00185021	-0.043 to 0.046	0.153656	0.066 to 0.241	0.000640433	0.00120864	0.15481	0.054 to 0.236
ApoA1	Apolipoprotein A1	-0.0686782	-0.119 to -0.019	0.00721688	0.208936	-0.0700931	-0.114 to -0.019	-0.277279	-0.364 to -0.19	8.98402e-10	3.31616e-09	-0.278313	-0.371 to -0.181
ApoB/ApoA1	Ratio of apolipoprotein B to apolipoprotein A1	0.0436939	-0.006 to 0.093	0.082583	0.592238	0.0440073	-0.004 to 0.094	0.308941	0.225 to 0.393	2.77812e-12	1.78797e-11	0.308277	0.217 to 0.39
Total fatty acids	Total fatty acids	-0.03046	-0.08 to 0.019	0.22696	0.947943	-0.0304375	-0.076 to 0.015	0.231528	0.145 to 0.318	2.43839e-07	6.24525e-07	0.231123	0.136 to 0.34
Unsaturation	Degree of unsaturation	0.0247786	-0.024 to 0.074	0.323017	0.947943	0.0247896	-0.015 to 0.071	-0.0383042	-0.127 to 0.05	0.396809	0.448645	-0.0410597	-0.129 to 0.042
Omega-3	Omega-3 fatty acids	0.0109607	-0.038 to 0.06	0.65914	0.947943	0.0118878	-0.034 to 0.057	0.10701	0.02 to 0.194	0.0165803	0.0247718	0.109552	0.013 to 0.184
Omega-6	Omega-6 fatty acids	-0.0291332	-0.079 to 0.02	0.250153	0.947943	-0.0301604	-0.074 to 0.016	0.194358	0.107 to 0.282	1.75254e-05	3.85867e-05	0.194119	0.088 to 0.289
PUFA	Polyunsaturated fatty acids	-0.0237759	-0.073 to 0.026	0.347773	0.947943	-0.0242312	-0.067 to 0.017	0.199731	0.112 to 0.287	9.94035e-06	2.24777e-05	0.200427	0.104 to 0.303
MUFA	Monounsaturated fatty acids	-0.0199027	-0.069 to 0.029	0.428184	0.947943	-0.020605	-0.061 to 0.028	0.32847	0.245 to 0.412	8.27336e-14	7.69116e-13	0.332107	0.223 to 0.415
SFA	Saturated fatty acids	-0.0374724	-0.087 to 0.012	0.136869	0.730941	-0.037077	-0.084 to 0.008	0.136362	0.048 to 0.225	0.00258101	0.00431889	0.139195	0.041 to 0.232
LA	Linoleic acid	-0.0238601	-0.073 to 0.026	0.345484	0.947943	-0.0238346	-0.068 to 0.024	0.233309	0.146 to 0.32	2.13036e-07	5.51258e-07	0.234866	0.129 to 0.332
DHA	Docosahexaenoic acid	0.0256128	-0.023 to 0.074	0.303699	0.947943	0.025513	-0.018 to 0.074	-0.0377165	-0.126 to 0.05	0.400909	0.451248	-0.0404147	-0.121 to 0.045
Omega-3 %	Ratio of omega-3 fatty acids to total fatty acids	0.0267752	-0.022 to 0.075	0.280174	0.947943	0.0260759	-0.017 to 0.076	0.00779606	-0.08 to 0.095	0.861615	0.889981	0.00466413	-0.078 to 0.092
Omega-6 %	Ratio of omega-6 fatty acids to total fatty acids	0.0133233	-0.036 to 0.062	0.595406	0.947943	0.0135124	-0.036 to 0.058	-0.175408	-0.263 to -0.088	9.27307e-05	0.000186145	-0.178	-0.263 to -0.085
PUFA %	Ratio of polyunsaturated fatty acids to total fatty acids	0.0229274	-0.026 to 0.072	0.363268	0.947943	0.0229311	-0.018 to 0.07	-0.165341	-0.253 to -0.077	0.00025113	0.000484875	-0.169036	-0.255 to -0.077
MUFA %	Ratio of monounsaturated fatty acids to total fatty acids	0.00875692	-0.04 to 0.058	0.726884	0.947943	0.00917991	-0.037 to 0.051	0.394405	0.313 to 0.476	8.11479e-20	3.39469e-18	0.396186	0.302 to 0.475
SFA %	Ratio of saturated fatty acids to total fatty acids	-0.0377395	-0.087 to 0.011	0.131843	0.719404	-0.0378899	-0.092 to 0.009	-0.249367	-0.335 to -0.164	2.03977e-08	5.68869e-08	-0.249338	-0.331 to -0.158
LA %	Ratio of linoleic acid to total fatty acids	0.00808301	-0.041 to 0.057	0.745558	0.947943	0.00822533	-0.039 to 0.055	0.0102395	-0.078 to 0.098	0.819629	0.854833	0.00908464	-0.078 to 0.107
DHA %	Ratio of docosahexaenoic acid to total fatty acids	0.0387513	-0.01 to 0.088	0.120558	0.703723	0.0387749	-0.003 to 0.091	-0.158399	-0.246 to -0.071	0.000401842	0.000764109	-0.157418	-0.258 to -0.079
PUFA/MUFA	Ratio of polyunsaturated fatty acids to monounsaturated fatty acids	0.000654772	-0.049 to 0.05	0.979263	0.99867	0.00152669	-0.04 to 0.045	-0.321372	-0.405 to -0.237	3.44254e-13	2.61841e-12	-0.320853	-0.413 to -0.231
Omega-6/Omega-3	Ratio of omega-6 fatty acids to omega-3 fatty acids	-0.023011	-0.072 to 0.026	0.354439	0.947943	-0.0226846	-0.066 to 0.021	-0.0326846	-0.12 to 0.055	0.465706	0.515931	-0.0335811	-0.109 to 0.045
Alanine	Alanine	-0.0427301	-0.084 to -0.002	0.0419273	0.40476	-0.0427957	-0.086 to -0.003	-0.0940931	-0.168 to -0.02	0.012681	0.0190595	-0.0938652	-0.167 to -0.012
Glutamine	Glutamine	0.0176308	-0.029 to 0.064	0.460927	0.947943	0.0151312	-0.023 to 0.06	-0.191862	-0.275 to -0.109	6.88316e-06	1.5997e-05	-0.191934	-0.279 to -0.099
Glycine	Glycine	0.00733064	-0.033 to 0.048	0.723851	0.947943	0.00754679	-0.029 to 0.043	0.144661	0.073 to 0.217	9.34431e-05	0.000186145	0.146488	0.064 to 0.226
Histidine	Histidine	-0.0238007	-0.069 to 0.022	0.304053	0.947943	-0.0255041	-0.064 to 0.019	0.00407494	-0.078 to 0.086	0.922114	0.937185	0.00591305	-0.093 to 0.092
Total BCAA	Total concentration of branched-chain amino acids (leucine + isoleucine + valine)	0.00407168	-0.043 to 0.051	0.8659	0.950041	0.00288047	-0.033 to 0.053	0.0867315	0.002 to 0.171	0.0450793	0.0628606	0.0895601	-0.01 to 0.179
Isoleucine	Isoleucine	0.0162012	-0.032 to 0.065	0.513571	0.947943	0.016302	-0.027 to 0.061	0.0439951	-0.043 to 0.131	0.323881	0.381663	0.0429687	-0.053 to 0.142
Leucine	Leucine	-0.00643062	-0.053 to 0.04	0.786085	0.947943	-0.00703097	-0.045 to 0.041	0.05381	-0.03 to 0.137	0.206405	0.259038	0.0546533	-0.032 to 0.145
Valine	Valine	0.00702979	-0.04 to 0.054	0.771412	0.947943	0.00741728	-0.034 to 0.064	0.117656	0.033 to 0.202	0.00665637	0.0104422	0.119886	0.021 to 0.211
Phenylalanine	Phenylalanine	-0.0103621	-0.055 to 0.034	0.64859	0.947943	-0.0105532	-0.052 to 0.029	0.136333	0.057 to 0.216	0.00080044	0.00147572	0.135542	0.053 to 0.226
Tyrosine	Tyrosine	0.00365244	-0.045 to 0.052	0.88191	0.950041	0.00340528	-0.044 to 0.058	0.0443125	-0.042 to 0.131	0.315502	0.375313	0.0445274	-0.039 to 0.139
Glucose	Glucose	0.00461332	-0.022 to 0.031	0.733845	0.947943	0.00473646	-0.019 to 0.031	-0.0795802	-0.127 to -0.032	0.00106867	0.00192975	-0.0791405	-0.146 to -0.033
Lactate	Lactate	-0.0137101	-0.031 to 0.004	0.131214	0.719404	-0.0138162	-0.031 to 0.002	0.0335102	0.002 to 0.065	0.0400773	0.0577913	0.0336997	0.001 to 0.071
Pyruvate	Pyruvate	-0.0088676	-0.036 to 0.018	0.524553	0.947943	-0.00895113	-0.059 to 0.02	0.0843506	0.036 to 0.133	0.000712704	0.00133499	0.084441	0.023 to 0.135
Citrate	Citrate	-0.00909407	-0.059 to 0.041	0.723302	0.947943	-0.0106729	-0.057 to 0.046	-0.135974	-0.226 to -0.046	0.00311679	0.00514681	-0.136697	-0.304 to -0.05
Glycerol	Glycerol	0.00647853	-0.049 to 0.062	0.820081	0.947943	0.00535579	-0.045 to 0.06	0.17507	0.074 to 0.277	0.000805472	0.00147572	0.177223	0.069 to 0.272
3-Hydroxybutyrate	3-Hydroxybutyrate	0.0090643	-0.04 to 0.058	0.718014	0.947943	0.00992888	-0.045 to 0.066	-0.0524452	-0.141 to 0.036	0.243761	0.299922	-0.0522501	-0.135 to 0.042
Acetate	Acetate	-0.0181611	-0.054 to 0.018	0.323623	0.947943	-0.0188949	-0.048 to 0.019	-0.102222	-0.166 to -0.038	0.00191809	0.00329754	-0.10088	-0.174 to -0.029
Acetoacetate	Acetoacetate	0.0102267	-0.03 to 0.051	0.621575	0.947943	0.0107313	-0.036 to 0.051	-0.0443524	-0.117 to 0.029	0.23371	0.288971	-0.0430107	-0.131 to 0.035
Acetone	Acetone	-0.0123654	-0.061 to 0.037	0.620805	0.947943	-0.0137034	-0.062 to 0.045	-0.159095	-0.246 to -0.072	0.00036849	0.000706038	-0.162437	-0.251 to -0.061
Creatinine	Creatinine	-0.014605	-0.065 to 0.036	0.568535	0.947943	-0.0140442	-0.065 to 0.042	0.265154	0.178 to 0.352	4.63718e-09	1.43695e-08	0.264878	0.174 to 0.358
Albumin	Albumin	-0.0607048	-0.11 to -0.011	0.0172176	0.2701	-0.0623974	-0.113 to -0.004	-0.28785	-0.374 to -0.202	1.59579e-10	7.15254e-10	-0.290315	-0.37 to -0.186
Glycoprotein acetyls	Glycoprotein acetyls	0.0653113	0.016 to 0.115	0.0102282	0.208936	0.0659546	0.02 to 0.122	-	-	-	-	-	-
XXL-VLDL-P	Concentration of chylomicrons and extremely large VLDL particles	0.0167408	-0.032 to 0.065	0.500546	0.947943	0.0169629	-0.023 to 0.056	0.265329	0.181 to 0.35	1.46008e-09	5.09e-09	0.269402	0.17 to 0.35
XXL-VLDL-L	Total lipids in chylomicrons and extremely large VLDL	0.0120302	-0.037 to 0.061	0.628316	0.947943	0.0117032	-0.028 to 0.052	0.248754	0.164 to 0.333	1.52972e-08	4.31414e-08	0.250842	0.151 to 0.338
XXL-VLDL-PL	Phospholipids in chylomicrons and extremely large VLDL	0.0308544	-0.019 to 0.081	0.223974	0.947943	0.0302859	-0.01 to 0.073	0.264154	0.178 to 0.35	3.88312e-09	1.23375e-08	0.264862	0.178 to 0.358
XXL-VLDL-C	Cholesterol in chylomicrons and extremely large VLDL	0.00826529	-0.041 to 0.058	0.743599	0.947943	0.00926107	-0.034 to 0.051	0.291862	0.207 to 0.377	5.12984e-11	2.86131e-10	0.291198	0.209 to 0.375
XXL-VLDL-CE	Cholesteryl esters in chylomicrons and extremely large VLDL	0.0107147	-0.039 to 0.06	0.672297	0.947943	0.0113327	-0.034 to 0.054	0.311331	0.227 to 0.396	2.38671e-12	1.57648e-11	0.31216	0.217 to 0.398
XXL-VLDL-FC	Free cholesterol in chylomicrons and extremely large VLDL	0.00815727	-0.041 to 0.057	0.745582	0.947943	0.00783262	-0.035 to 0.045	0.261872	0.176 to 0.347	3.70465e-09	1.19214e-08	0.264172	0.174 to 0.348
XXL-VLDL-TG	Triglycerides in chylomicrons and extremely large VLDL	0.0407063	-0.008 to 0.09	0.104661	0.656745	0.0405033	0.002 to 0.081	0.177352	0.09 to 0.264	7.58266e-05	0.000154736	0.176449	0.083 to 0.263
XL-VLDL-P	Concentration of very large VLDL particles	0.00574467	-0.041 to 0.053	0.809825	0.947943	0.00592637	-0.031 to 0.05	0.260813	0.18 to 0.342	5.75259e-10	2.22139e-09	0.260485	0.181 to 0.353
XL-VLDL-L	Total lipids in very large VLDL	0.0140983	-0.033 to 0.061	0.556811	0.947943	0.015049	-0.026 to 0.054	0.256319	0.175 to 0.338	1.42391e-09	5.09e-09	0.260459	0.168 to 0.343
XL-VLDL-PL	Phospholipids in very large VLDL	0.0225065	-0.026 to 0.071	0.362556	0.947943	0.021237	-0.01 to 0.061	0.252084	0.168 to 0.336	8.09373e-09	2.44762e-08	0.25085	0.175 to 0.348
XL-VLDL-C	Cholesterol in very large VLDL	0.0149192	-0.034 to 0.064	0.547532	0.947943	0.0153182	-0.025 to 0.059	0.283984	0.2 to 0.368	7.72638e-11	3.87864e-10	0.283685	0.187 to 0.369
XL-VLDL-CE	Cholesteryl esters in very large VLDL	0.0178272	-0.031 to 0.067	0.478955	0.947943	0.0185681	-0.018 to 0.056	0.276689	0.191 to 0.362	4.59008e-10	1.82875e-09	0.277548	0.186 to 0.366
XL-VLDL-FC	Free cholesterol in very large VLDL	0.0150145	-0.033 to 0.063	0.538494	0.947943	0.0156408	-0.029 to 0.056	0.276025	0.194 to 0.358	1.34396e-10	6.24693e-10	0.277218	0.189 to 0.379
XL-VLDL-TG	Triglycerides in very large VLDL	0.0142718	-0.033 to 0.061	0.553064	0.947943	0.0142103	-0.019 to 0.05	0.198259	0.115 to 0.281	3.62243e-06	8.49748e-06	0.197103	0.132 to 0.279
L-VLDL-P	Concentration of large VLDL particles	0.00373266	-0.043 to 0.05	0.874572	0.950041	0.00367313	-0.037 to 0.044	0.268348	0.189 to 0.348	1.13722e-10	5.48926e-10	0.270701	0.181 to 0.351
L-VLDL-L	Total lipids in large VLDL	0.00794374	-0.038 to 0.054	0.734776	0.947943	0.00830932	-0.037 to 0.05	0.245354	0.166 to 0.325	3.13099e-09	1.0261e-08	0.247347	0.155 to 0.323
L-VLDL-PL	Phospholipids in large VLDL	0.0133512	-0.034 to 0.061	0.582787	0.947943	0.0151215	-0.026 to 0.06	0.247579	0.165 to 0.33	8.3488e-09	2.4947e-08	0.248863	0.174 to 0.326
L-VLDL-C	Cholesterol in large VLDL	0.0124738	-0.035 to 0.06	0.60914	0.947943	0.0124713	-0.031 to 0.055	0.274375	0.192 to 0.357	1.70022e-10	7.48691e-10	0.275738	0.183 to 0.358
L-VLDL-CE	Cholesteryl esters in large VLDL	0.0180821	-0.03 to 0.066	0.462997	0.947943	0.0183796	-0.022 to 0.063	0.271548	0.188 to 0.355	4.05081e-10	1.69459e-09	0.271568	0.175 to 0.363
L-VLDL-FC	Free cholesterol in large VLDL	0.00687679	-0.04 to 0.054	0.775661	0.947943	0.00721274	-0.037 to 0.053	0.273111	0.192 to 0.355	1.28311e-10	6.0766e-10	0.273929	0.181 to 0.361
L-VLDL-TG	Triglycerides in large VLDL	0.0070603	-0.038 to 0.052	0.757104	0.947943	0.00742155	-0.031 to 0.049	0.206999	0.129 to 0.285	3.21634e-07	8.15455e-07	0.208725	0.118 to 0.287
M-VLDL-P	Concentration of medium VLDL particles	0.00475375	-0.044 to 0.053	0.848145	0.94825	0.00508802	-0.038 to 0.051	0.215199	0.13 to 0.301	1.06357e-06	2.64314e-06	0.216824	0.11 to 0.298
M-VLDL-L	Total lipids in medium VLDL	0.00653708	-0.042 to 0.055	0.789944	0.947943	0.00613722	-0.036 to 0.053	0.227361	0.143 to 0.311	1.74489e-07	4.56215e-07	0.228984	0.14 to 0.317
M-VLDL-PL	Phospholipids in medium VLDL	0.00575952	-0.044 to 0.056	0.822118	0.947943	0.00562408	-0.028 to 0.036	0.126684	0.037 to 0.216	0.00577877	0.00923867	0.127158	-0.067 to 0.203
M-VLDL-C	Cholesterol in medium VLDL	0.0155844	-0.034 to 0.065	0.540517	0.947943	0.0169128	-0.028 to 0.057	0.119524	0.03 to 0.209	0.00883425	0.0136037	0.118563	0.028 to 0.218
M-VLDL-CE	Cholesteryl esters in medium VLDL	0.0181333	-0.032 to 0.068	0.476159	0.947943	0.0189806	-0.029 to 0.061	0.0605337	-0.029 to 0.15	0.185793	0.237929	0.0622984	-0.037 to 0.144
M-VLDL-FC	Free cholesterol in medium VLDL	0.0130266	-0.036 to 0.063	0.606241	0.947943	0.0125567	-0.028 to 0.063	0.178357	0.091 to 0.266	7.64732e-05	0.000154797	0.181283	0.076 to 0.261
M-VLDL-TG	Triglycerides in medium VLDL	0.00425418	-0.042 to 0.05	0.856514	0.950041	0.00479402	-0.039 to 0.048	0.249514	0.17 to 0.329	1.87898e-09	6.46061e-09	0.252007	0.157 to 0.337
S-VLDL-P	Concentration of small VLDL particles	0.0139112	-0.034 to 0.062	0.573282	0.947943	0.0137042	-0.03 to 0.061	0.347932	0.267 to 0.429	5.39469e-16	7.52259e-15	0.351386	0.251 to 0.443
S-VLDL-L	Total lipids in small VLDL	0.0115037	-0.037 to 0.06	0.643561	0.947943	0.0123239	-0.031 to 0.059	0.330685	0.248 to 0.413	2.51331e-14	2.52337e-13	0.332623	0.24 to 0.428
S-VLDL-PL	Phospholipids in small VLDL	0.0129362	-0.036 to 0.062	0.606185	0.947943	0.0133546	-0.032 to 0.052	0.27157	0.187 to 0.357	8.49828e-10	3.18368e-09	0.273078	0.178 to 0.364
S-VLDL-C	Cholesterol in small VLDL	0.0194796	-0.029 to 0.068	0.435862	0.947943	0.0202465	-0.025 to 0.06	0.259011	0.174 to 0.344	4.55927e-09	1.43047e-08	0.256113	0.174 to 0.348
S-VLDL-CE	Cholesteryl esters in small VLDL	0.0211953	-0.028 to 0.07	0.394446	0.947943	0.0192631	-0.02 to 0.066	0.287198	0.203 to 0.371	5.4446e-11	2.97086e-10	0.284117	0.198 to 0.379
S-VLDL-FC	Free cholesterol in small VLDL	0.0162962	-0.033 to 0.066	0.517796	0.947943	0.0170476	-0.033 to 0.058	0.199825	0.113 to 0.287	8.43186e-06	1.94165e-05	0.201346	0.094 to 0.289
S-VLDL-TG	Triglycerides in small VLDL	0.00508528	-0.042 to 0.052	0.833172	0.947943	0.00629403	-0.04 to 0.054	0.356651	0.278 to 0.435	1.47573e-17	3.70409e-16	0.356337	0.27 to 0.46
XS-VLDL-P	Concentration of very small VLDL particles	0.00882334	-0.04 to 0.057	0.720809	0.947943	0.00893709	-0.032 to 0.058	0.263556	0.18 to 0.347	1.45873e-09	5.09e-09	0.264871	0.17 to 0.356
XS-VLDL-L	Total lipids in very small VLDL	0.0102571	-0.038 to 0.059	0.677852	0.947943	0.0103544	-0.032 to 0.053	0.284591	0.201 to 0.368	5.6702e-11	3.02813e-10	0.283889	0.192 to 0.375
XS-VLDL-PL	Phospholipids in very small VLDL	0.0160325	-0.032 to 0.064	0.514938	0.947943	0.0142783	-0.023 to 0.058	0.330369	0.249 to 0.412	1.45445e-14	1.58724e-13	0.328605	0.246 to 0.423
XS-VLDL-C	Cholesterol in very small VLDL	0.00976916	-0.039 to 0.058	0.693121	0.947943	0.0094102	-0.035 to 0.052	0.164871	0.079 to 0.251	0.000192021	0.000373623	0.163791	0.076 to 0.257
XS-VLDL-CE	Cholesteryl esters in very small VLDL	0.00645801	-0.042 to 0.055	0.794711	0.947943	0.00620578	-0.035 to 0.054	0.117896	0.031 to 0.205	0.00803981	0.0125341	0.118514	0.023 to 0.202
XS-VLDL-FC	Free cholesterol in very small VLDL	0.0163226	-0.032 to 0.065	0.50755	0.947943	0.0176006	-0.027 to 0.061	0.260045	0.176 to 0.344	2.25194e-09	7.63835e-09	0.260241	0.174 to 0.352
XS-VLDL-TG	Triglycerides in very small VLDL	0.0028212	-0.046 to 0.051	0.909511	0.963237	0.00172397	-0.039 to 0.054	0.406653	0.327 to 0.486	1.31933e-21	8.27877e-20	0.406642	0.309 to 0.493
IDL-P	Concentration of IDL particles	0.00302644	-0.046 to 0.052	0.904559	0.962052	0.00385029	-0.044 to 0.048	0.0916229	0.003 to 0.18	0.0431411	0.0608337	0.090923	0.003 to 0.182
IDL-L	Total lipids in IDL	-0.0152577	-0.064 to 0.034	0.542922	0.947943	-0.0156874	-0.064 to 0.028	0.00353615	-0.085 to 0.092	0.937532	0.948873	0.00468401	-0.099 to 0.097
IDL-PL	Phospholipids in IDL	-0.00771992	-0.057 to 0.041	0.756731	0.947943	-0.00818544	-0.052 to 0.037	0.0384581	-0.049 to 0.126	0.390785	0.445851	0.0367562	-0.051 to 0.132
IDL-C	Cholesterol in IDL	-0.0175471	-0.067 to 0.032	0.486363	0.947943	-0.0186422	-0.066 to 0.028	-0.0545811	-0.143 to 0.034	0.228459	0.283877	-0.0536383	-0.144 to 0.041
IDL-CE	Cholesteryl esters in IDL	-0.0200486	-0.07 to 0.029	0.427889	0.947943	-0.0193071	-0.063 to 0.021	-0.0591424	-0.148 to 0.03	0.193293	0.243802	-0.059959	-0.152 to 0.034
IDL-FC	Free cholesterol in IDL	-0.00944625	-0.058 to 0.039	0.704899	0.947943	-0.0106279	-0.056 to 0.034	-0.0396012	-0.127 to 0.048	0.377276	0.435817	-0.040861	-0.129 to 0.063
IDL-TG	Triglycerides in IDL	-0.00617142	-0.055 to 0.042	0.802973	0.947943	-0.00532014	-0.059 to 0.036	0.350398	0.269 to 0.432	3.56891e-16	5.96337e-15	0.349554	0.265 to 0.445
L-LDL-P	Concentration of large LDL particles	4.1757e-05	-0.049 to 0.049	0.99867	0.99867	0.000228216	-0.052 to 0.043	0.137409	0.05 to 0.225	0.00218251	0.00368678	0.136129	0.044 to 0.227
L-LDL-L	Total lipids in large LDL	-0.0153693	-0.065 to 0.034	0.546072	0.947943	-0.0160924	-0.066 to 0.026	-0.0330225	-0.123 to 0.057	0.470847	0.518344	-0.0346466	-0.135 to 0.061
L-LDL-PL	Phospholipids in large LDL	-0.0151699	-0.065 to 0.034	0.549391	0.947943	-0.0156337	-0.06 to 0.032	-0.0355621	-0.125 to 0.054	0.435208	0.485498	-0.0356747	-0.13 to 0.055
L-LDL-C	Cholesterol in large LDL	-0.0133092	-0.064 to 0.037	0.604504	0.947943	-0.0147301	-0.052 to 0.024	-0.06865	-0.159 to 0.022	0.137094	0.186004	-0.0667129	-0.242 to 0.011
L-LDL-CE	Cholesteryl esters in large LDL	-0.00769567	-0.059 to 0.043	0.768095	0.947943	-0.00798283	-0.031 to 0.008	-0.0679565	-0.16 to 0.024	0.14732	0.195647	-0.0710174	-0.343 to 0.006
L-LDL-FC	Free cholesterol in large LDL	-0.0149131	-0.065 to 0.035	0.557346	0.947943	-0.0152015	-0.06 to 0.028	-0.107781	-0.197 to -0.019	0.0180725	0.0268415	-0.110268	-0.234 to -0.023
L-LDL-TG	Triglycerides in large LDL	-0.0167246	-0.065 to 0.032	0.499047	0.947943	-0.0172385	-0.067 to 0.035	0.301344	0.218 to 0.384	3.86085e-12	2.30732e-11	0.300124	0.217 to 0.404
M-LDL-P	Concentration of medium LDL particles	0.00670023	-0.043 to 0.057	0.792316	0.947943	0.00669866	-0.042 to 0.053	0.12429	0.035 to 0.213	0.0064136	0.0101887	0.122907	0.03 to 0.219
M-LDL-L	Total lipids in medium LDL	-0.00867098	-0.059 to 0.041	0.734902	0.947943	-0.00937364	-0.057 to 0.039	0.044525	-0.046 to 0.135	0.333527	0.391192	0.0426123	-0.056 to 0.145
M-LDL-PL	Phospholipids in medium LDL	-0.0103006	-0.06 to 0.04	0.686705	0.947943	-0.0106672	-0.058 to 0.036	0.0483134	-0.042 to 0.138	0.292705	0.351526	0.0491212	-0.057 to 0.139
M-LDL-C	Cholesterol in medium LDL	-0.00655605	-0.057 to 0.044	0.798968	0.947943	-0.00690984	-0.049 to 0.031	0.00842599	-0.082 to 0.099	0.85561	0.887431	0.011128	-0.135 to 0.096
M-LDL-CE	Cholesteryl esters in medium LDL	-0.00510148	-0.056 to 0.046	0.845043	0.94825	-0.00516367	-0.028 to 0.013	-0.0290238	-0.121 to 0.063	0.536394	0.582835	-0.028915	-0.464 to 0.046
M-LDL-FC	Free cholesterol in medium LDL	-0.00626417	-0.056 to 0.044	0.806674	0.947943	-0.00651384	-0.051 to 0.038	-0.0638987	-0.154 to 0.026	0.164796	0.215436	-0.0630339	-0.182 to 0.024
M-LDL-TG	Triglycerides in medium LDL	-0.0209788	-0.07 to 0.028	0.400506	0.947943	-0.0199031	-0.075 to 0.024	0.327535	0.245 to 0.41	5.81325e-14	5.61202e-13	0.329788	0.23 to 0.42
S-LDL-P	Concentration of small LDL particles	-0.00672568	-0.056 to 0.043	0.789276	0.947943	-0.00754026	-0.057 to 0.035	0.137998	0.05 to 0.226	0.00218857	0.00368678	0.13855	0.046 to 0.23
S-LDL-L	Total lipids in small LDL	-0.00559133	-0.055 to 0.044	0.825586	0.947943	-0.00590554	-0.052 to 0.043	0.117521	0.029 to 0.206	0.00976884	0.0148605	0.116522	0.019 to 0.214
S-LDL-PL	Phospholipids in small LDL	0.00477052	-0.045 to 0.054	0.850025	0.94825	0.00433726	-0.042 to 0.051	0.152168	0.064 to 0.24	0.000743345	0.00138207	0.153321	0.048 to 0.236
S-LDL-C	Cholesterol in small LDL	-0.00674723	-0.057 to 0.043	0.790998	0.947943	-0.00682243	-0.054 to 0.035	0.0644935	-0.025 to 0.154	0.158639	0.209571	0.0644884	-0.035 to 0.169
S-LDL-CE	Cholesteryl esters in small LDL	-0.0108264	-0.061 to 0.039	0.670291	0.947943	-0.0106199	-0.056 to 0.035	0.0865098	-0.003 to 0.176	0.0581377	0.0797408	0.0860198	-0.007 to 0.182
S-LDL-FC	Free cholesterol in small LDL	0.00597485	-0.044 to 0.056	0.814804	0.947943	0.00541899	-0.047 to 0.053	0.0011486	-0.089 to 0.091	0.980029	0.98395	0.00261038	-0.084 to 0.095
S-LDL-TG	Triglycerides in small LDL	-0.0216577	-0.071 to 0.027	0.385233	0.947943	-0.0218076	-0.07 to 0.024	0.360925	0.279 to 0.443	7.5965e-17	1.63001e-15	0.363407	0.267 to 0.453
XL-HDL-P	Concentration of very large HDL particles	-0.0239739	-0.074 to 0.026	0.344787	0.947943	-0.0238427	-0.075 to 0.026	-0.000759303	-0.09 to 0.089	0.986734	0.986734	-0.00214182	-0.088 to 0.096
XL-HDL-L	Total lipids in very large HDL	-0.0127619	-0.063 to 0.037	0.618264	0.947943	-0.0133996	-0.06 to 0.038	0.00267735	-0.088 to 0.093	0.953661	0.961321	0.00149278	-0.085 to 0.089
XL-HDL-PL	Phospholipids in very large HDL	0.00716649	-0.044 to 0.058	0.783345	0.947943	0.00664082	-0.026 to 0.078	0.0182273	-0.074 to 0.11	0.697427	0.741755	0.0198242	-0.035 to 0.093
XL-HDL-C	Cholesterol in very large HDL	-0.0119664	-0.062 to 0.038	0.638439	0.947943	-0.0117857	-0.063 to 0.038	-0.0312566	-0.121 to 0.058	0.494985	0.540179	-0.032263	-0.114 to 0.066
XL-HDL-CE	Cholesteryl esters in very large HDL	-0.0151689	-0.065 to 0.035	0.551894	0.947943	-0.0149299	-0.069 to 0.033	-0.0506346	-0.14 to 0.039	0.269373	0.329817	-0.0499584	-0.139 to 0.03
XL-HDL-FC	Free cholesterol in very large HDL	0.00158406	-0.048 to 0.051	0.950269	0.981872	0.00103273	-0.047 to 0.049	0.0487764	-0.041 to 0.138	0.285397	0.346061	0.0479492	-0.041 to 0.137
XL-HDL-TG	Triglycerides in very large HDL	-0.0271886	-0.076 to 0.022	0.278851	0.947943	-0.02651	-0.073 to 0.02	0.274716	0.19 to 0.36	5.5505e-10	2.17684e-09	0.275936	0.172 to 0.374
L-HDL-P	Concentration of large HDL particles	-0.0474469	-0.097 to 0.002	0.060461	0.492713	-0.048006	-0.095 to 0	-0.184555	-0.272 to -0.097	4.35271e-05	9.02918e-05	-0.18422	-0.281 to -0.098
L-HDL-L	Total lipids in large HDL	-0.0463729	-0.096 to 0.003	0.0669835	0.494681	-0.0481284	-0.089 to 0.006	-0.186903	-0.275 to -0.099	3.56456e-05	7.51852e-05	-0.184725	-0.273 to -0.097
L-HDL-PL	Phospholipids in large HDL	-0.0476272	-0.097 to 0.002	0.060853	0.492713	-0.0484773	-0.091 to 0	-0.186072	-0.274 to -0.098	4.13329e-05	8.64548e-05	-0.187266	-0.277 to -0.097
L-HDL-C	Cholesterol in large HDL	-0.0421971	-0.092 to 0.007	0.0947007	0.636604	-0.04149	-0.088 to 0.008	-0.19928	-0.287 to -0.112	9.5911e-06	2.18852e-05	-0.201068	-0.294 to -0.115
L-HDL-CE	Cholesteryl esters in large HDL	-0.0419034	-0.091 to 0.007	0.0963782	0.636604	-0.0416079	-0.086 to 0.011	-0.214446	-0.301 to -0.128	1.74903e-06	4.26221e-06	-0.21382	-0.303 to -0.127
L-HDL-FC	Free cholesterol in large HDL	-0.041462	-0.091 to 0.008	0.102744	0.656745	-0.0424013	-0.088 to 0.009	-0.14236	-0.231 to -0.054	0.00177087	0.00312296	-0.143233	-0.23 to -0.049
L-HDL-TG	Triglycerides in large HDL	-0.0465853	-0.096 to 0.003	0.0652812	0.494681	-0.0468739	-0.098 to 0.002	0.0597593	-0.029 to 0.149	0.189052	0.239657	0.057261	-0.03 to 0.157
M-HDL-P	Concentration of medium HDL particles	-0.0696305	-0.12 to -0.02	0.0064577	0.208936	-0.0702922	-0.117 to -0.023	-0.304121	-0.39 to -0.218	1.52072e-11	8.67502e-11	-0.305443	-0.39 to -0.203
M-HDL-L	Total lipids in medium HDL	-0.0709028	-0.121 to -0.021	0.00558635	0.208936	-0.0713281	-0.116 to -0.023	-0.282834	-0.37 to -0.196	4.19081e-10	1.72442e-09	-0.284217	-0.381 to -0.184
M-HDL-PL	Phospholipids in medium HDL	-0.0719377	-0.122 to -0.022	0.00496942	0.208936	-0.072535	-0.121 to -0.025	-0.25847	-0.346 to -0.171	1.32452e-08	3.77788e-08	-0.257963	-0.347 to -0.158
M-HDL-C	Cholesterol in medium HDL	-0.0658705	-0.116 to -0.016	0.00973144	0.208936	-0.0670658	-0.11 to -0.021	-0.330816	-0.416 to -0.246	1.35041e-13	1.12984e-12	-0.329777	-0.429 to -0.247
M-HDL-CE	Cholesteryl esters in medium HDL	-0.0657793	-0.115 to -0.016	0.00973633	0.208936	-0.0662867	-0.114 to -0.022	-0.343733	-0.428 to -0.259	1.16859e-14	1.39674e-13	-0.342877	-0.432 to -0.252
M-HDL-FC	Free cholesterol in medium HDL	-0.0639209	-0.114 to -0.014	0.0124862	0.208936	-0.0643808	-0.111 to -0.016	-0.269471	-0.357 to -0.182	2.77566e-09	9.28922e-09	-0.266887	-0.373 to -0.169
M-HDL-TG	Triglycerides in medium HDL	-0.0425301	-0.092 to 0.007	0.0914999	0.636604	-0.0446602	-0.092 to 0.008	0.117791	0.029 to 0.206	0.00922382	0.0141169	0.122539	0.022 to 0.208
S-HDL-P	Concentration of small HDL particles	-0.0575823	-0.108 to -0.007	0.025462	0.336366	-0.0590854	-0.103 to -0.01	-0.261919	-0.35 to -0.174	9.87147e-09	2.91499e-08	-0.264081	-0.359 to -0.168
S-HDL-L	Total lipids in small HDL	-0.0644498	-0.115 to -0.014	0.0120056	0.208936	-0.0649849	-0.111 to -0.017	-0.218017	-0.307 to -0.129	1.89157e-06	4.56524e-06	-0.218073	-0.315 to -0.114
S-HDL-PL	Phospholipids in small HDL	-0.0669003	-0.117 to -0.017	0.00866871	0.208936	-0.0675453	-0.119 to -0.022	-0.2162	-0.304 to -0.128	1.987e-06	4.74987e-06	-0.214867	-0.316 to -0.13
S-HDL-C	Cholesterol in small HDL	-0.0568065	-0.107 to -0.007	0.0273266	0.341482	-0.0570975	-0.104 to -0.009	-0.283692	-0.371 to -0.196	4.46705e-10	1.80844e-09	-0.285644	-0.371 to -0.178
S-HDL-CE	Cholesteryl esters in small HDL	-0.0558083	-0.106 to -0.006	0.0300869	0.341482	-0.0559273	-0.111 to -0.012	-0.320823	-0.407 to -0.235	1.25823e-12	9.02332e-12	-0.319561	-0.413 to -0.227
S-HDL-FC	Free cholesterol in small HDL	-0.0525971	-0.103 to -0.003	0.0399757	0.40476	-0.0533649	-0.102 to -0.006	-0.14323	-0.233 to -0.054	0.00181773	0.00314655	-0.138988	-0.246 to -0.051
S-HDL-TG	Triglycerides in small HDL	-0.0212846	-0.07 to 0.027	0.39104	0.947943	-0.019541	-0.082 to 0.024	0.274398	0.19 to 0.358	3.54738e-10	1.50914e-09	0.272422	0.188 to 0.363
XXL-VLDL-PL %	Phospholipids to total lipids ratio in chylomicrons and extremely large VLDL	0.0144287	-0.035 to 0.064	0.565805	0.947943	0.0146695	-0.026 to 0.06	0.0926731	0.002 to 0.183	0.0457089	0.063038	0.0925027	-0.004 to 0.183
XXL-VLDL-C %	Cholesterol to total lipids ratio in chylomicrons and extremely large VLDL	0.018736	-0.025 to 0.063	0.406135	0.947943	0.0186139	-0.021 to 0.057	0.00407393	-0.078 to 0.086	0.922249	0.937185	0.00404559	-0.089 to 0.092
XXL-VLDL-CE %	Cholesteryl esters to total lipids ratio in chylomicrons and extremely large VLDL	0.024865	-0.018 to 0.068	0.261349	0.947943	0.0248996	-0.012 to 0.062	0.0552559	-0.025 to 0.135	0.177112	0.229151	0.0542278	-0.032 to 0.149
XXL-VLDL-FC %	Free cholesterol to total lipids ratio in chylomicrons and extremely large VLDL	0.0126746	-0.035 to 0.06	0.598983	0.947943	0.0124934	-0.031 to 0.057	-0.0614069	-0.149 to 0.026	0.168039	0.218538	-0.0640423	-0.17 to 0.037
XXL-VLDL-TG %	Triglycerides to total lipids ratio in chylomicrons and extremely large VLDL	0.026189	-0.024 to 0.077	0.308655	0.947943	0.025962	-0.015 to 0.067	0.00683923	-0.086 to 0.1	0.885796	0.911208	0.00699189	-0.087 to 0.105
XL-VLDL-PL %	Phospholipids to total lipids ratio in very large VLDL	0.0262611	-0.025 to 0.077	0.311813	0.947943	0.0267585	-0.003 to 0.059	0.193008	0.103 to 0.283	3.2248e-05	6.85953e-05	0.193429	0.114 to 0.299
XL-VLDL-C %	Cholesterol to total lipids ratio in very large VLDL	-0.00381341	-0.049 to 0.042	0.869511	0.950041	-0.00347508	-0.041 to 0.029	-0.0550371	-0.137 to 0.027	0.188272	0.239657	-0.0590445	-0.139 to 0.032
XL-VLDL-CE %	Cholesteryl esters to total lipids ratio in very large VLDL	-0.000373972	-0.046 to 0.045	0.987078	0.99867	-0.00135433	-0.039 to 0.035	-0.0843961	-0.166 to -0.003	0.0422607	0.059929	-0.0835115	-0.166 to -0.006
XL-VLDL-FC %	Free cholesterol to total lipids ratio in very large VLDL	0.0104911	-0.038 to 0.059	0.671404	0.947943	0.0101289	-0.021 to 0.046	0.0945439	0.008 to 0.182	0.0336325	0.0490799	0.0924172	0.007 to 0.206
XL-VLDL-TG %	Triglycerides to total lipids ratio in very large VLDL	0.00549323	-0.044 to 0.055	0.828878	0.947943	0.00564537	-0.015 to 0.024	0.0104355	-0.079 to 0.1	0.819919	0.854833	0.0097269	-0.024 to 0.081
L-VLDL-PL %	Phospholipids to total lipids ratio in large VLDL	0.0142052	-0.037 to 0.065	0.585897	0.947943	0.0139413	-0.012 to 0.104	0.145835	0.055 to 0.237	0.00177921	0.00312296	0.144987	0.101 to 0.251
L-VLDL-C %	Cholesterol to total lipids ratio in large VLDL	0.0111835	-0.034 to 0.057	0.628898	0.947943	0.0112623	-0.029 to 0.044	0.0849115	0.004 to 0.166	0.0409429	0.0583901	0.0826271	0.011 to 0.179
L-VLDL-CE %	Cholesteryl esters to total lipids ratio in large VLDL	0.0231619	-0.022 to 0.068	0.316318	0.947943	0.0239137	-0.013 to 0.059	0.0611683	-0.02 to 0.142	0.141006	0.189264	0.0592751	-0.021 to 0.14
L-VLDL-FC %	Free cholesterol to total lipids ratio in large VLDL	-0.0111312	-0.058 to 0.036	0.641194	0.947943	-0.0104489	-0.05 to 0.026	0.123425	0.04 to 0.207	0.00391444	0.00633887	0.123234	0.015 to 0.209
L-VLDL-TG %	Triglycerides to total lipids ratio in large VLDL	-0.00117217	-0.048 to 0.046	0.961034	0.988604	-0.00225708	-0.038 to 0.038	-0.178903	-0.262 to -0.096	2.86854e-05	6.15387e-05	-0.176898	-0.258 to -0.097
M-VLDL-PL %	Phospholipids to total lipids ratio in medium VLDL	-0.000295065	-0.051 to 0.051	0.990923	0.99867	2.23195e-05	-0.021 to 0.012	-0.0437429	-0.135 to 0.048	0.348249	0.406561	-0.0446585	-0.355 to 0.026
M-VLDL-C %	Cholesterol to total lipids ratio in medium VLDL	0.0156882	-0.031 to 0.063	0.511884	0.947943	0.016439	-0.03 to 0.052	-0.116442	-0.2 to -0.033	0.00660089	0.0104203	-0.117707	-0.204 to -0.034
M-VLDL-CE %	Cholesteryl esters to total lipids ratio in medium VLDL	0.0162083	-0.031 to 0.063	0.499167	0.947943	0.0157042	-0.03 to 0.055	-0.138863	-0.222 to -0.055	0.00121327	0.00217522	-0.141119	-0.222 to -0.055
M-VLDL-FC %	Free cholesterol to total lipids ratio in medium VLDL	0.0167558	-0.031 to 0.064	0.49149	0.947943	0.0165339	-0.019 to 0.053	-0.0474586	-0.133 to 0.038	0.278533	0.339378	-0.048256	-0.165 to 0.027
M-VLDL-TG %	Triglycerides to total lipids ratio in medium VLDL	-0.00555658	-0.052 to 0.041	0.813794	0.947943	-0.00555205	-0.045 to 0.033	0.0921897	0.009 to 0.175	0.0294209	0.043185	0.0926344	0.013 to 0.175
S-VLDL-PL %	Phospholipids to total lipids ratio in small VLDL	0.00556752	-0.043 to 0.054	0.822502	0.947943	0.00551319	-0.039 to 0.043	-0.169229	-0.255 to -0.083	0.000133604	0.000261988	-0.169516	-0.266 to -0.077
S-VLDL-C %	Cholesterol to total lipids ratio in small VLDL	0.020062	-0.025 to 0.065	0.382702	0.947943	0.0201725	-0.019 to 0.059	-0.105335	-0.186 to -0.025	0.0105967	0.0160227	-0.107011	-0.195 to -0.022
S-VLDL-CE %	Cholesteryl esters to total lipids ratio in small VLDL	0.024119	-0.019 to 0.068	0.277036	0.947943	0.0240205	-0.014 to 0.062	-0.0338599	-0.112 to 0.044	0.39636	0.448645	-0.0347441	-0.114 to 0.051
S-VLDL-FC %	Free cholesterol to total lipids ratio in small VLDL	0.0113407	-0.037 to 0.06	0.646766	0.947943	0.0110646	-0.032 to 0.049	-0.205489	-0.291 to -0.12	3.03088e-06	7.17689e-06	-0.203947	-0.31 to -0.125
S-VLDL-TG %	Triglycerides to total lipids ratio in small VLDL	-0.0116341	-0.057 to 0.034	0.619065	0.947943	-0.0107985	-0.051 to 0.029	0.132485	0.051 to 0.214	0.00155795	0.00277337	0.134127	0.052 to 0.223
XS-VLDL-PL %	Phospholipids to total lipids ratio in very small VLDL	0.0395217	-0.01 to 0.089	0.120131	0.703723	0.0394669	-0.006 to 0.086	0.350219	0.266 to 0.434	2.79785e-15	3.5113e-14	0.349718	0.251 to 0.436
XS-VLDL-C %	Cholesterol to total lipids ratio in very small VLDL	-7.29234e-05	-0.049 to 0.049	0.997688	0.99867	-0.000163938	-0.052 to 0.051	-0.337594	-0.421 to -0.254	1.44814e-14	1.58724e-13	-0.338718	-0.427 to -0.25
XS-VLDL-CE %	Cholesteryl esters to total lipids ratio in very small VLDL	-0.00796649	-0.057 to 0.041	0.751199	0.947943	-0.00673198	-0.064 to 0.044	-0.353168	-0.436 to -0.271	6.26233e-16	8.27287e-15	-0.35228	-0.446 to -0.273
XS-VLDL-FC %	Free cholesterol to total lipids ratio in very small VLDL	0.0478154	-0.001 to 0.097	0.0554398	0.485598	0.0468936	0.001 to 0.099	-0.0920611	-0.18 to -0.004	0.0402928	0.0577913	-0.09625	-0.19 to -0.007
XS-VLDL-TG %	Triglycerides to total lipids ratio in very small VLDL	-0.0145659	-0.063 to 0.034	0.559236	0.947943	-0.014386	-0.071 to 0.032	0.251972	0.167 to 0.337	1.11805e-08	3.26314e-08	0.25363	0.165 to 0.337
IDL-PL %	Phospholipids to total lipids ratio in IDL	0.0466137	-0.003 to 0.096	0.0670086	0.494681	0.0462663	-0.002 to 0.094	0.192607	0.104 to 0.281	2.23751e-05	4.84151e-05	0.192057	0.103 to 0.281
IDL-C %	Cholesterol to total lipids ratio in IDL	-0.0231968	-0.073 to 0.027	0.364965	0.947943	-0.0238631	-0.074 to 0.027	-0.370397	-0.454 to -0.287	7.79289e-17	1.63001e-15	-0.370772	-0.47 to -0.29
IDL-CE %	Cholesteryl esters to total lipids ratio in IDL	-0.0333915	-0.084 to 0.017	0.193726	0.947943	-0.0328809	-0.083 to 0.013	-0.328106	-0.414 to -0.242	3.03842e-13	2.38326e-12	-0.325902	-0.421 to -0.233
IDL-FC %	Free cholesterol to total lipids ratio in IDL	0.025838	-0.022 to 0.074	0.293263	0.947943	0.0258493	-0.028 to 0.08	-0.228554	-0.313 to -0.144	1.60435e-07	4.23886e-07	-0.231144	-0.316 to -0.13
IDL-TG %	Triglycerides to total lipids ratio in IDL	0.0105076	-0.039 to 0.06	0.680197	0.947943	0.0113804	-0.043 to 0.06	0.390754	0.308 to 0.473	6.87243e-19	2.46426e-17	0.39629	0.3 to 0.483
L-LDL-PL %	Phospholipids to total lipids ratio in large LDL	0.00940413	-0.042 to 0.061	0.718604	0.947943	0.00982402	-0.017 to 0.037	0.0233065	-0.069 to 0.115	0.619561	0.670301	0.0258352	-0.056 to 0.262
L-LDL-C %	Cholesterol to total lipids ratio in large LDL	-0.0039115	-0.055 to 0.047	0.881347	0.950041	-0.00402614	-0.029 to 0.01	-0.140981	-0.232 to -0.05	0.00265614	0.00441517	-0.142678	-0.398 to -0.067
L-LDL-CE %	Cholesteryl esters to total lipids ratio in large LDL	-0.0033416	-0.055 to 0.048	0.89855	0.959728	-0.00334048	-0.033 to 0.001	-0.0698471	-0.162 to 0.022	0.138025	0.186259	-0.0756602	-0.375 to -0.002
L-LDL-FC %	Free cholesterol to total lipids ratio in large LDL	-0.00741646	-0.056 to 0.041	0.765144	0.947943	-0.00769198	-0.048 to 0.029	-0.356977	-0.438 to -0.276	1.1916e-16	2.30071e-15	-0.356839	-0.507 to -0.286
L-LDL-TG %	Triglycerides to total lipids ratio in large LDL	0.000470122	-0.05 to 0.051	0.985443	0.99867	0.000373738	-0.045 to 0.048	0.364683	0.28 to 0.449	3.80135e-16	5.96337e-15	0.36555	0.284 to 0.467
M-LDL-PL %	Phospholipids to total lipids ratio in medium LDL	-0.00237169	-0.054 to 0.049	0.927674	0.974252	-0.00163599	-0.03 to 0.027	0.019312	-0.073 to 0.111	0.681121	0.730604	0.0173196	-0.056 to 0.27
M-LDL-C %	Cholesterol to total lipids ratio in medium LDL	0.00414736	-0.047 to 0.055	0.874041	0.950041	0.00405786	-0.018 to 0.023	-0.146206	-0.237 to -0.055	0.00179175	0.00312312	-0.145311	-0.433 to -0.074
M-LDL-CE %	Cholesteryl esters to total lipids ratio in medium LDL	-0.00250102	-0.054 to 0.049	0.923981	0.974252	-0.00222761	-0.035 to 0.003	-0.0578331	-0.15 to 0.034	0.219597	0.274223	-0.0579309	-0.31 to 0.01
M-LDL-FC %	Free cholesterol to total lipids ratio in medium LDL	0.00539888	-0.043 to 0.053	0.825395	0.947943	0.00510905	-0.042 to 0.057	-0.398186	-0.477 to -0.32	2.63251e-21	1.32152e-19	-0.40219	-0.483 to -0.301
M-LDL-TG %	Triglycerides to total lipids ratio in medium LDL	-0.0129434	-0.063 to 0.037	0.615207	0.947943	-0.01237	-0.058 to 0.03	0.315264	0.229 to 0.401	2.93305e-12	1.84049e-11	0.316601	0.228 to 0.43
S-LDL-PL %	Phospholipids to total lipids ratio in small LDL	0.0406825	-0.009 to 0.09	0.109066	0.667696	0.0408977	-0.003 to 0.084	0.0914941	0.002 to 0.181	0.0449672	0.0628606	0.0904351	0.003 to 0.196
S-LDL-C %	Cholesterol to total lipids ratio in small LDL	-0.0116219	-0.061 to 0.038	0.645354	0.947943	-0.0110283	-0.052 to 0.025	-0.269962	-0.356 to -0.184	1.38088e-09	5.0232e-09	-0.271838	-0.386 to -0.19
S-LDL-CE %	Cholesteryl esters to total lipids ratio in small LDL	-0.0296858	-0.079 to 0.019	0.234206	0.947943	-0.0295236	-0.075 to 0.008	-0.09193	-0.18 to -0.004	0.0402692	0.0577913	-0.088481	-0.219 to -0.016
S-LDL-FC %	Free cholesterol to total lipids ratio in small LDL	0.0298775	-0.02 to 0.08	0.241301	0.947943	0.0288972	-0.012 to 0.079	-0.284263	-0.37 to -0.198	2.54737e-10	1.1024e-09	-0.28925	-0.375 to -0.187
S-LDL-TG %	Triglycerides to total lipids ratio in small LDL	-0.0220825	-0.071 to 0.027	0.380345	0.947943	-0.0216854	-0.07 to 0.024	0.325992	0.242 to 0.41	1.30599e-13	1.12984e-12	0.327479	0.242 to 0.419
XL-HDL-PL %	Phospholipids to total lipids ratio in very large HDL	0.0183192	-0.033 to 0.069	0.482367	0.947943	0.0202228	-0.009 to 0.106	0.0227136	-0.069 to 0.115	0.628276	0.676812	0.0233828	-0.011 to 0.114
XL-HDL-C %	Cholesterol to total lipids ratio in very large HDL	0.00759828	-0.043 to 0.058	0.76702	0.947943	0.0076842	-0.043 to 0.057	-0.133206	-0.223 to -0.044	0.00372983	0.00607915	-0.135035	-0.215 to -0.039
XL-HDL-CE %	Cholesteryl esters to total lipids ratio in very large HDL	-0.0139156	-0.063 to 0.035	0.579086	0.947943	-0.0137893	-0.06 to 0.032	-0.23338	-0.319 to -0.147	1.55211e-07	4.14445e-07	-0.232468	-0.316 to -0.127
XL-HDL-FC %	Free cholesterol to total lipids ratio in very large HDL	0.025233	-0.025 to 0.076	0.328703	0.947943	0.0269274	-0.028 to 0.07	0.0363632	-0.055 to 0.127	0.434004	0.485498	0.0340292	-0.055 to 0.125
XL-HDL-TG %	Triglycerides to total lipids ratio in very large HDL	-0.0111181	-0.061 to 0.039	0.66386	0.947943	-0.0112509	-0.066 to 0.037	0.21798	0.13 to 0.306	1.6368e-06	4.02782e-06	0.216584	0.132 to 0.298
L-HDL-PL %	Phospholipids to total lipids ratio in large HDL	0.0194055	-0.028 to 0.066	0.419233	0.947943	0.0186468	-0.03 to 0.071	0.126747	0.043 to 0.211	0.00322564	0.00529173	0.128025	0.044 to 0.209
L-HDL-C %	Cholesterol to total lipids ratio in large HDL	-0.0128759	-0.062 to 0.036	0.60769	0.947943	-0.0125945	-0.069 to 0.038	-0.195914	-0.283 to -0.109	1.15474e-05	2.58786e-05	-0.198238	-0.285 to -0.117
L-HDL-CE %	Cholesteryl esters to total lipids ratio in large HDL	-0.0109232	-0.06 to 0.038	0.659944	0.947943	-0.0105109	-0.063 to 0.038	-0.243063	-0.328 to -0.158	3.19786e-08	8.82046e-08	-0.243488	-0.334 to -0.169
L-HDL-FC %	Free cholesterol to total lipids ratio in large HDL	-0.011917	-0.062 to 0.039	0.643854	0.947943	-0.0111964	-0.069 to 0.032	0.0489144	-0.042 to 0.14	0.291226	0.351431	0.0481754	-0.046 to 0.128
L-HDL-TG %	Triglycerides to total lipids ratio in large HDL	0.00611242	-0.044 to 0.056	0.809377	0.947943	0.00564387	-0.044 to 0.055	0.254944	0.169 to 0.341	1.27857e-08	3.68875e-08	0.257272	0.174 to 0.337
M-HDL-PL %	Phospholipids to total lipids ratio in medium HDL	0.0258805	-0.021 to 0.072	0.274966	0.947943	0.0266169	-0.011 to 0.07	0.334373	0.256 to 0.412	5.09401e-16	7.52116e-15	0.335334	0.249 to 0.423
M-HDL-C %	Cholesterol to total lipids ratio in medium HDL	-0.0134561	-0.061 to 0.034	0.58185	0.947943	-0.0134273	-0.065 to 0.032	-0.362606	-0.442 to -0.283	1.03925e-17	2.89836e-16	-0.364469	-0.451 to -0.275
M-HDL-CE %	Cholesteryl esters to total lipids ratio in medium HDL	-0.00345104	-0.051 to 0.044	0.887172	0.951624	-0.00289918	-0.056 to 0.045	-0.348566	-0.428 to -0.269	1.52661e-16	2.73699e-15	-0.350253	-0.444 to -0.257
M-HDL-FC %	Free cholesterol to total lipids ratio in medium HDL	-0.0370599	-0.087 to 0.013	0.146099	0.748384	-0.0381269	-0.085 to 0.007	-0.195	-0.283 to -0.107	1.80253e-05	3.93422e-05	-0.195058	-0.294 to -0.096
M-HDL-TG %	Triglycerides to total lipids ratio in medium HDL	0.00520947	-0.044 to 0.054	0.834643	0.947943	0.00432883	-0.036 to 0.061	0.332276	0.25 to 0.415	2.34714e-14	2.45472e-13	0.335369	0.246 to 0.418
S-HDL-PL %	Phospholipids to total lipids ratio in small HDL	-0.0258754	-0.072 to 0.02	0.272823	0.947943	-0.0263568	-0.068 to 0.02	-0.01398	-0.097 to 0.069	0.742022	0.782553	-0.0120444	-0.103 to 0.082
S-HDL-C %	Cholesterol to total lipids ratio in small HDL	0.0117726	-0.035 to 0.058	0.620418	0.947943	0.0117152	-0.04 to 0.053	-0.257839	-0.338 to -0.177	7.75553e-10	2.94945e-09	-0.260069	-0.346 to -0.164
S-HDL-CE %	Cholesteryl esters to total lipids ratio in small HDL	0.00723113	-0.041 to 0.055	0.767227	0.947943	0.00780292	-0.039 to 0.053	-0.314055	-0.395 to -0.233	1.9682e-13	1.59361e-12	-0.314036	-0.412 to -0.217
S-HDL-FC %	Free cholesterol to total lipids ratio in small HDL	0.0148697	-0.032 to 0.062	0.533607	0.947943	0.0151215	-0.031 to 0.056	0.142925	0.06 to 0.226	0.000821918	0.00149494	0.14254	0.053 to 0.23
S-HDL-TG %	Triglycerides to total lipids ratio in small HDL	0.0142615	-0.035 to 0.063	0.567412	0.947943	0.0135052	-0.034 to 0.064	0.432263	0.353 to 0.511	2.89589e-24	2.4229e-22	0.432791	0.343 to 0.515
hsCRP	High sensitivity C-Reactive Protein	0.0636865	0.014 to 0.113	0.0119435	0.208936	0.0632691	0.025 to 0.115	0.545362	0.47 to 0.621	2.03641e-38	2.5557e-36	0.547516	0.448 to 0.617
Regression coefficients (β) are estimated difference in log metabolomic measure at 6 months of age (SD units) per 1 increase in total parent-reported infections from birth to 6 months of age, or per 1 SD increase in 6-month log GlycA.
Models are adjusted for infant sex, birth weight z-score, gestational age, exact age at 6-month time point, maternal household income, exposure to any breastfeeding, exposure to any maternal smoking during pregnancy, and 6-month blood sample processing time.
Adjusted p-values are based on the Benjamini-Hochberg method of adjustment for multiple comparisons.
Bootstrap estimates are calculated as the mean coefficent across 1000 iterations of bootstrap resampling.
Bootstrap 95% confidence intervals are bias-corrected accelerated percentile confidence intervals.
