# Supplementary material for: Early life infection and proinflammatory, atherogenic metabolomic and lipidomic profiles in infancy: a population-based cohort study
Source: eLife. 2022 May 10;11:e75170. doi: 10.7554/eLife.75170 (PMC9090335; doi:10.7554/eLife.75170)
Supplement: Figure 3—source data 3. [file elife-75170-fig3-data3.xlsx]

## Sheet: Figure 3 - Source Data 3
Figure 3 - Source Data 3. Summary of regression models for difference in 12-month NMR metabolomic measures (adjusted for corresponding 6-month measure) per 1 increase in parent-reported infection from 6 to 12 months of age (adjusted for infections from birth to 6 months) or per SD increase in 12-month log GlycA (adjusted for 6-month GlycA).
		Parent reported infections from 6 to 12 months (adjusted for infections from birth to 6 months)						12-month GlycA (adjusted for 6-month GlycA)
Measure	Description	Estimate (β)	95% Confidence Interval	P-value	Adj. P-value	Bootstrap Estimate	Bootstrap 95% Confidence Interval	Estimate (β)	95% Confidence Interval	P-value	Adj. P-value	Bootstrap Estimate	Bootstrap 95% Confidence Interval
XXL-VLDL-P	Concentration of chylomicrons and extremely large VLDL particles	0.0151779	-0.024 to 0.054	0.444507	0.6565	0.0144235	-0.025 to 0.052	0.320201	0.23 to 0.41	1.10533e-11	2.9607e-11	0.318896	0.234 to 0.405
XXL-VLDL-L	Total lipids in chylomicrons and extremely large VLDL	0.0159936	-0.023 to 0.055	0.420866	0.639829	0.0164544	-0.024 to 0.057	0.325572	0.236 to 0.416	5.01852e-12	1.37703e-11	0.325134	0.237 to 0.411
XXL-VLDL-PL	Phospholipids in chylomicrons and extremely large VLDL	0.0151874	-0.024 to 0.054	0.446635	0.6565	0.0152984	-0.024 to 0.053	0.302723	0.211 to 0.394	2.15415e-10	5.26831e-10	0.300782	0.214 to 0.388
XXL-VLDL-C	Cholesterol in chylomicrons and extremely large VLDL	0.0233592	-0.015 to 0.062	0.237795	0.43499	0.0231973	-0.014 to 0.063	0.376679	0.289 to 0.465	6.50835e-16	2.52479e-15	0.374489	0.289 to 0.452
XXL-VLDL-CE	Cholesteryl esters in chylomicrons and extremely large VLDL	0.0298087	-0.009 to 0.069	0.132078	0.312815	0.030146	-0.011 to 0.067	0.403187	0.316 to 0.49	3.14897e-18	1.61027e-17	0.403596	0.324 to 0.478
XXL-VLDL-FC	Free cholesterol in chylomicrons and extremely large VLDL	0.0157215	-0.023 to 0.055	0.429671	0.648832	0.0148598	-0.021 to 0.054	0.328521	0.238 to 0.419	3.89172e-12	1.09455e-11	0.328656	0.246 to 0.419
XXL-VLDL-TG	Triglycerides in chylomicrons and extremely large VLDL	0.0145156	-0.024 to 0.054	0.46614	0.663807	0.0139487	-0.025 to 0.055	0.309171	0.219 to 0.4	6.83268e-11	1.72736e-10	0.310454	0.227 to 0.396
XL-VLDL-P	Concentration of very large VLDL particles	0.0169172	-0.022 to 0.056	0.393531	0.610651	0.0164598	-0.025 to 0.055	0.342562	0.253 to 0.432	3.70283e-13	1.11085e-12	0.339774	0.262 to 0.429
XL-VLDL-L	Total lipids in very large VLDL	0.0170465	-0.022 to 0.056	0.390284	0.610586	0.015735	-0.022 to 0.057	0.346563	0.257 to 0.436	1.86844e-13	6.0057e-13	0.344224	0.26 to 0.44
XL-VLDL-PL	Phospholipids in very large VLDL	0.0164309	-0.023 to 0.055	0.408917	0.625894	0.0160384	-0.021 to 0.054	0.34471	0.255 to 0.435	2.97593e-13	9.1724e-13	0.342574	0.255 to 0.416
XL-VLDL-C	Cholesterol in very large VLDL	0.0165813	-0.022 to 0.055	0.401002	0.617983	0.0157275	-0.02 to 0.056	0.348232	0.259 to 0.437	1.09249e-13	3.56248e-13	0.346217	0.254 to 0.437
XL-VLDL-CE	Cholesteryl esters in very large VLDL	0.0173224	-0.021 to 0.056	0.379389	0.605408	0.0163605	-0.018 to 0.058	0.338342	0.249 to 0.428	6.01007e-13	1.75619e-12	0.339536	0.25 to 0.415
XL-VLDL-FC	Free cholesterol in very large VLDL	0.0153372	-0.024 to 0.054	0.439698	0.6565	0.0135915	-0.024 to 0.055	0.344641	0.255 to 0.434	2.52041e-13	7.87629e-13	0.34187	0.252 to 0.426
XL-VLDL-TG	Triglycerides in very large VLDL	0.0181836	-0.021 to 0.057	0.363583	0.58433	0.0160326	-0.023 to 0.059	0.339828	0.249 to 0.431	9.95589e-13	2.87189e-12	0.338476	0.251 to 0.424
L-VLDL-P	Concentration of large VLDL particles	0.0244395	-0.014 to 0.062	0.208335	0.414826	0.02298	-0.017 to 0.065	0.382696	0.295 to 0.47	1.33991e-16	5.63542e-16	0.381906	0.292 to 0.458
L-VLDL-L	Total lipids in large VLDL	0.0247105	-0.013 to 0.063	0.203697	0.409213	0.024164	-0.015 to 0.065	0.384247	0.297 to 0.472	1.05535e-16	4.65595e-16	0.383735	0.301 to 0.464
L-VLDL-PL	Phospholipids in large VLDL	0.0266151	-0.012 to 0.065	0.17326	0.371973	0.0250267	-0.011 to 0.068	0.396627	0.309 to 0.484	1.46042e-17	6.84573e-17	0.396646	0.317 to 0.481
L-VLDL-C	Cholesterol in large VLDL	0.0234306	-0.014 to 0.061	0.22526	0.429522	0.0233041	-0.015 to 0.057	0.381659	0.294 to 0.469	1.61718e-16	6.61575e-16	0.380799	0.293 to 0.464
L-VLDL-CE	Cholesteryl esters in large VLDL	0.023885	-0.014 to 0.062	0.214176	0.415428	0.0247988	-0.015 to 0.061	0.380032	0.293 to 0.467	1.88086e-16	7.42443e-16	0.379924	0.301 to 0.467
L-VLDL-FC	Free cholesterol in large VLDL	0.0215337	-0.017 to 0.06	0.269626	0.470278	0.0211804	-0.018 to 0.061	0.355082	0.266 to 0.444	3.54364e-14	1.20363e-13	0.353149	0.275 to 0.453
L-VLDL-TG	Triglycerides in large VLDL	0.0243256	-0.014 to 0.063	0.212452	0.415428	0.0240153	-0.013 to 0.065	0.372916	0.285 to 0.461	1.20177e-15	4.58301e-15	0.368386	0.291 to 0.463
M-VLDL-P	Concentration of medium VLDL particles	0.041141	0.005 to 0.078	0.0278636	0.10626	0.0407059	0.002 to 0.077	0.427297	0.346 to 0.509	1.754e-22	1.23328e-21	0.427045	0.338 to 0.51
M-VLDL-L	Total lipids in medium VLDL	0.0404236	0.004 to 0.077	0.0306046	0.112886	0.03939	0.005 to 0.08	0.432882	0.352 to 0.514	4.14355e-23	3.32964e-22	0.431845	0.354 to 0.517
M-VLDL-PL	Phospholipids in medium VLDL	0.0423565	0.005 to 0.08	0.026044	0.10626	0.0416049	0.001 to 0.081	0.452726	0.371 to 0.534	8.68908e-25	8.88656e-24	0.451655	0.374 to 0.531
M-VLDL-C	Cholesterol in medium VLDL	0.0458384	0.01 to 0.082	0.0124474	0.0829022	0.0468739	0.009 to 0.082	0.468449	0.39 to 0.547	1.03194e-27	1.45116e-26	0.468464	0.385 to 0.547
M-VLDL-CE	Cholesteryl esters in medium VLDL	0.0452704	0.009 to 0.081	0.0135461	0.0829022	0.0451408	0.01 to 0.079	0.482079	0.405 to 0.56	8.24458e-30	1.37906e-28	0.482047	0.408 to 0.562
M-VLDL-FC	Free cholesterol in medium VLDL	0.0437821	0.008 to 0.08	0.0176357	0.0922798	0.043889	0.008 to 0.081	0.427742	0.346 to 0.51	2.56946e-22	1.7519e-21	0.428856	0.342 to 0.514
M-VLDL-TG	Triglycerides in medium VLDL	0.0350983	-0.002 to 0.072	0.0616705	0.182577	0.0351132	-0.003 to 0.073	0.399788	0.317 to 0.483	1.72946e-19	9.97765e-19	0.395689	0.314 to 0.486
S-VLDL-P	Concentration of small VLDL particles	0.0394232	0.006 to 0.073	0.0230043	0.105157	0.0407516	0.006 to 0.07	0.446907	0.368 to 0.526	1.91548e-25	2.15491e-24	0.448358	0.36 to 0.543
S-VLDL-L	Total lipids in small VLDL	0.0393298	0.006 to 0.073	0.0227935	0.105157	0.0387448	0.006 to 0.072	0.445878	0.367 to 0.525	1.54734e-25	1.83238e-24	0.449995	0.36 to 0.534
S-VLDL-PL	Phospholipids in small VLDL	0.0393337	0.006 to 0.073	0.0205889	0.100707	0.0395354	0.008 to 0.068	0.407215	0.327 to 0.487	2.72071e-21	1.74903e-20	0.409376	0.327 to 0.514
S-VLDL-C	Cholesterol in small VLDL	0.0339589	0.001 to 0.067	0.0437172	0.142556	0.0349568	0.003 to 0.064	0.408419	0.331 to 0.486	1.30039e-22	9.43834e-22	0.410793	0.332 to 0.513
S-VLDL-CE	Cholesteryl esters in small VLDL	0.0228776	-0.01 to 0.056	0.174899	0.371973	0.0225947	-0.004 to 0.051	0.320181	0.237 to 0.404	3.21851e-13	9.786e-13	0.321797	0.236 to 0.44
S-VLDL-FC	Free cholesterol in small VLDL	0.0448831	0.012 to 0.078	0.00810726	0.0675605	0.0445046	0.015 to 0.08	0.429799	0.352 to 0.508	2.68089e-24	2.4128e-23	0.430162	0.344 to 0.524
S-VLDL-TG	Triglycerides in small VLDL	0.0404121	0.005 to 0.075	0.0242011	0.10626	0.0397728	0.007 to 0.073	0.437924	0.355 to 0.52	7.56841e-23	5.87205e-22	0.439398	0.356 to 0.531
XS-VLDL-P	Concentration of very small VLDL particles	0.0185606	-0.017 to 0.054	0.300657	0.511977	0.0175387	-0.019 to 0.052	0.419324	0.342 to 0.496	7.5698e-24	6.55079e-23	0.420984	0.336 to 0.492
XS-VLDL-L	Total lipids in very small VLDL	0.0118412	-0.024 to 0.047	0.511717	0.693593	0.0116499	-0.026 to 0.046	0.400144	0.321 to 0.479	3.05029e-21	1.90643e-20	0.399729	0.32 to 0.486
XS-VLDL-PL	Phospholipids in very small VLDL	0.00446127	-0.032 to 0.041	0.810902	0.922804	0.00557937	-0.033 to 0.041	0.315318	0.23 to 0.4	1.47714e-12	4.20704e-12	0.312642	0.237 to 0.413
XS-VLDL-C	Cholesterol in very small VLDL	-0.0027888	-0.038 to 0.032	0.875465	0.933552	-0.00249119	-0.039 to 0.033	0.312847	0.23 to 0.395	5.63701e-13	1.66885e-12	0.312992	0.235 to 0.418
XS-VLDL-CE	Cholesteryl esters in very small VLDL	-0.00345261	-0.038 to 0.031	0.846288	0.928541	-0.00307158	-0.04 to 0.032	0.301244	0.218 to 0.384	4.7844e-12	1.329e-11	0.304618	0.218 to 0.385
XS-VLDL-FC	Free cholesterol in very small VLDL	-0.00146645	-0.038 to 0.035	0.936888	0.976896	-0.000679732	-0.044 to 0.031	0.306206	0.221 to 0.391	7.05622e-12	1.91283e-11	0.306981	0.224 to 0.401
XS-VLDL-TG	Triglycerides in very small VLDL	0.0458272	0.009 to 0.083	0.0151066	0.0829022	0.0464135	0.007 to 0.082	0.521233	0.445 to 0.598	1.90144e-34	1.06956e-32	0.522293	0.433 to 0.59
IDL-P	Concentration of IDL particles	0.00331104	-0.031 to 0.038	0.850131	0.928541	0.00331723	-0.031 to 0.042	0.240134	0.157 to 0.323	2.41343e-08	5.32374e-08	0.238247	0.144 to 0.329
IDL-L	Total lipids in IDL	0.00422188	-0.031 to 0.039	0.812068	0.922804	0.00378586	-0.036 to 0.04	0.226482	0.142 to 0.311	2.1576e-07	4.45375e-07	0.225903	0.139 to 0.329
IDL-PL	Phospholipids in IDL	0.00358648	-0.031 to 0.038	0.838736	0.925077	0.00302248	-0.035 to 0.042	0.189408	0.105 to 0.274	1.49695e-05	2.65208e-05	0.188211	0.099 to 0.292
IDL-C	Cholesterol in IDL	-0.00315591	-0.038 to 0.032	0.859662	0.929923	-0.0027082	-0.044 to 0.037	0.182941	0.097 to 0.269	3.87995e-05	6.71529e-05	0.183046	0.093 to 0.282
IDL-CE	Cholesteryl esters in IDL	-0.00456392	-0.04 to 0.031	0.799002	0.917221	-0.00337028	-0.044 to 0.032	0.198013	0.112 to 0.284	8.59913e-06	1.5859e-05	0.197186	0.105 to 0.31
IDL-FC	Free cholesterol in IDL	0.00105084	-0.034 to 0.036	0.953117	0.983722	-0.000247325	-0.038 to 0.047	0.138835	0.051 to 0.226	0.00197254	0.00270622	0.138496	0.052 to 0.244
IDL-TG	Triglycerides in IDL	0.040519	0.005 to 0.076	0.0274586	0.10626	0.0413957	-0.001 to 0.076	0.488699	0.414 to 0.563	2.07067e-32	4.23546e-31	0.487985	0.406 to 0.574
L-LDL-P	Concentration of large LDL particles	0.00319064	-0.031 to 0.037	0.854938	0.92928	0.00330012	-0.034 to 0.039	0.192141	0.109 to 0.276	8.51788e-06	1.5839e-05	0.192085	0.102 to 0.282
L-LDL-L	Total lipids in large LDL	0.00604337	-0.029 to 0.041	0.73315	0.877441	0.00677524	-0.036 to 0.042	0.19246	0.108 to 0.277	1.08804e-05	1.95848e-05	0.191111	0.11 to 0.304
L-LDL-PL	Phospholipids in large LDL	-0.000480081	-0.035 to 0.034	0.978531	0.991755	-0.0014509	-0.039 to 0.039	0.165051	0.079 to 0.251	0.000190928	0.000302527	0.163058	0.074 to 0.258
L-LDL-C	Cholesterol in large LDL	0.00378116	-0.031 to 0.039	0.832101	0.925077	0.00351071	-0.033 to 0.05	0.171932	0.086 to 0.258	0.000102225	0.000169121	0.169038	0.089 to 0.278
L-LDL-CE	Cholesteryl esters in large LDL	3.87892e-05	-0.036 to 0.037	0.998339	0.998339	0.0034622	-0.043 to 0.045	0.195313	0.106 to 0.284	2.1201e-05	3.69785e-05	0.183799	0.116 to 0.302
L-LDL-FC	Free cholesterol in large LDL	-0.00158579	-0.037 to 0.034	0.929732	0.976896	-0.00260154	-0.042 to 0.042	0.132419	0.045 to 0.22	0.00321157	0.00422575	0.131509	0.034 to 0.231
L-LDL-TG	Triglycerides in large LDL	0.031808	-0.004 to 0.067	0.0782651	0.212164	0.0326967	-0.003 to 0.074	0.427838	0.352 to 0.504	3.09681e-25	3.31801e-24	0.429036	0.334 to 0.506
M-LDL-P	Concentration of medium LDL particles	0.0101736	-0.023 to 0.044	0.550626	0.72877	0.00919151	-0.023 to 0.052	0.17402	0.091 to 0.257	4.54252e-05	7.74293e-05	0.173543	0.092 to 0.265
M-LDL-L	Total lipids in medium LDL	0.00942303	-0.024 to 0.043	0.577897	0.743011	0.00834743	-0.027 to 0.054	0.163417	0.081 to 0.246	0.000118917	0.000192492	0.162392	0.077 to 0.249
M-LDL-PL	Phospholipids in medium LDL	0.0111896	-0.021 to 0.043	0.497514	0.683925	0.010047	-0.02 to 0.063	0.142523	0.062 to 0.223	0.000603235	0.000892946	0.144877	0.066 to 0.229
M-LDL-C	Cholesterol in medium LDL	0.00539553	-0.028 to 0.039	0.753809	0.878793	0.00568913	-0.032 to 0.044	0.145436	0.061 to 0.23	0.000776798	0.00112038	0.14571	0.057 to 0.231
M-LDL-CE	Cholesteryl esters in medium LDL	0.0130099	-0.022 to 0.048	0.461052	0.663355	0.0134133	-0.024 to 0.059	0.13694	0.048 to 0.225	0.00256465	0.0034348	0.12855	0.042 to 0.232
M-LDL-FC	Free cholesterol in medium LDL	0.00520466	-0.027 to 0.037	0.751252	0.878793	0.00444085	-0.029 to 0.054	0.0832395	0.002 to 0.165	0.0456539	0.054639	0.0848185	-0.002 to 0.177
M-LDL-TG	Triglycerides in medium LDL	0.039931	0.006 to 0.074	0.0224266	0.105157	0.0399659	0.006 to 0.088	0.347495	0.268 to 0.427	1.13383e-16	4.90598e-16	0.346538	0.275 to 0.431
S-LDL-P	Concentration of small LDL particles	0.00545069	-0.028 to 0.039	0.751802	0.878793	0.00411802	-0.03 to 0.046	0.160097	0.076 to 0.244	0.000208914	0.000326427	0.159855	0.084 to 0.253
S-LDL-L	Total lipids in small LDL	0.00479619	-0.029 to 0.038	0.778074	0.902405	0.00501831	-0.031 to 0.046	0.137667	0.054 to 0.221	0.00129368	0.00180794	0.138632	0.056 to 0.224
S-LDL-PL	Phospholipids in small LDL	0.00108909	-0.032 to 0.035	0.949193	0.983722	0.00156174	-0.034 to 0.048	0.0731824	-0.011 to 0.157	0.0892112	0.105092	0.0737278	-0.006 to 0.165
S-LDL-C	Cholesterol in small LDL	0.00287159	-0.031 to 0.037	0.868295	0.933552	0.00283278	-0.034 to 0.043	0.124603	0.04 to 0.21	0.00429955	0.00549659	0.123509	0.041 to 0.224
S-LDL-CE	Cholesteryl esters in small LDL	0.00815788	-0.026 to 0.043	0.642531	0.807651	0.00652603	-0.028 to 0.049	0.123343	0.037 to 0.21	0.00544743	0.0069247	0.123209	0.034 to 0.214
S-LDL-FC	Free cholesterol in small LDL	-0.000784223	-0.034 to 0.033	0.963462	0.988874	-0.00141727	-0.034 to 0.047	0.0566139	-0.028 to 0.142	0.192065	0.217981	0.0554306	-0.027 to 0.161
S-LDL-TG	Triglycerides in small LDL	0.0373613	0.002 to 0.073	0.04144	0.137118	0.0383911	-0.003 to 0.082	0.389013	0.307 to 0.471	6.30516e-19	3.37777e-18	0.388718	0.317 to 0.462
XL-HDL-P	Concentration of very large HDL particles	-0.0706732	-0.105 to -0.036	7.83568e-05	0.002751	-0.0705793	-0.117 to -0.034	-0.0361414	-0.123 to 0.051	0.416012	0.441523	-0.0391862	-0.126 to 0.082
XL-HDL-L	Total lipids in very large HDL	-0.0721225	-0.107 to -0.037	5.70972e-05	0.002751	-0.0721662	-0.114 to -0.037	-0.0367678	-0.124 to 0.05	0.409164	0.436312	-0.037478	-0.133 to 0.08
XL-HDL-PL	Phospholipids in very large HDL	-0.0710422	-0.107 to -0.036	0.000103133	0.00290063	-0.0693026	-0.116 to -0.038	-0.0806081	-0.169 to 0.007	0.0733531	0.0868655	-0.0792153	-0.167 to 0.022
XL-HDL-C	Cholesterol in very large HDL	-0.0755237	-0.112 to -0.039	5.98366e-05	0.002751	-0.0750115	-0.123 to -0.039	-0.0242586	-0.116 to 0.068	0.60552	0.633684	-0.0250207	-0.127 to 0.093
XL-HDL-CE	Cholesteryl esters in very large HDL	-0.0738597	-0.11 to -0.037	8.55867e-05	0.002751	-0.0729322	-0.123 to -0.04	-0.00803942	-0.1 to 0.084	0.864396	0.880041	-0.00994536	-0.109 to 0.114
XL-HDL-FC	Free cholesterol in very large HDL	-0.0805411	-0.118 to -0.043	2.85953e-05	0.002751	-0.080938	-0.128 to -0.042	-0.0535971	-0.147 to 0.04	0.260856	0.284916	-0.056466	-0.157 to 0.081
XL-HDL-TG	Triglycerides in very large HDL	-0.0118133	-0.052 to 0.028	0.562674	0.736056	-0.0123291	-0.067 to 0.033	0.358672	0.269 to 0.449	4.1997e-14	1.38961e-13	0.356221	0.274 to 0.466
L-HDL-P	Concentration of large HDL particles	-0.0365744	-0.073 to 0	0.0503435	0.157323	-0.036769	-0.074 to -0.003	-0.149183	-0.236 to -0.063	0.000775011	0.00112038	-0.147591	-0.239 to -0.051
L-HDL-L	Total lipids in large HDL	-0.0382527	-0.075 to -0.002	0.0409727	0.137118	-0.0390493	-0.075 to -0.001	-0.156977	-0.243 to -0.071	0.000411207	0.000625146	-0.156754	-0.244 to -0.055
L-HDL-PL	Phospholipids in large HDL	-0.0352856	-0.073 to 0.003	0.0682713	0.196936	-0.0359448	-0.071 to 0.003	-0.145801	-0.235 to -0.057	0.00146105	0.00201679	-0.146497	-0.227 to -0.047
L-HDL-C	Cholesterol in large HDL	-0.0406763	-0.077 to -0.004	0.0287846	0.107942	-0.0401994	-0.075 to -0.007	-0.181022	-0.267 to -0.095	4.03981e-05	6.93861e-05	-0.183073	-0.265 to -0.076
L-HDL-CE	Cholesteryl esters in large HDL	-0.0391354	-0.076 to -0.003	0.0364411	0.128113	-0.03971	-0.073 to -0.002	-0.171689	-0.258 to -0.085	0.00010928	0.000179474	-0.172371	-0.257 to -0.072
L-HDL-FC	Free cholesterol in large HDL	-0.0450955	-0.081 to -0.009	0.0150452	0.0829022	-0.0431799	-0.083 to -0.011	-0.204882	-0.29 to -0.12	2.84366e-06	5.56369e-06	-0.202671	-0.297 to -0.114
L-HDL-TG	Triglycerides in large HDL	-0.000181094	-0.04 to 0.039	0.992814	0.997247	0.000673894	-0.042 to 0.037	0.226496	0.136 to 0.317	1.43892e-06	2.8651e-06	0.228024	0.14 to 0.324
M-HDL-P	Concentration of medium HDL particles	-0.0351595	-0.073 to 0.002	0.0674103	0.196936	-0.0354765	-0.076 to 0.004	-0.254494	-0.343 to -0.166	2.95259e-08	6.32697e-08	-0.253943	-0.378 to -0.142
M-HDL-L	Total lipids in medium HDL	-0.0384641	-0.076 to -0.001	0.0457218	0.146963	-0.0391631	-0.08 to -0.001	-0.271452	-0.359 to -0.184	2.97305e-09	6.96809e-09	-0.273391	-0.381 to -0.144
M-HDL-PL	Phospholipids in medium HDL	-0.034455	-0.072 to 0.003	0.0721192	0.200331	-0.0348598	-0.073 to 0.007	-0.225038	-0.314 to -0.136	1.02027e-06	2.04965e-06	-0.227704	-0.347 to -0.105
M-HDL-C	Cholesterol in medium HDL	-0.0470855	-0.085 to -0.009	0.0148265	0.0829022	-0.0479522	-0.086 to -0.007	-0.355403	-0.44 to -0.271	1.99729e-15	7.36707e-15	-0.351483	-0.479 to -0.245
M-HDL-CE	Cholesteryl esters in medium HDL	-0.047986	-0.086 to -0.01	0.0131404	0.0829022	-0.0487731	-0.087 to -0.013	-0.369601	-0.454 to -0.285	1.3525e-16	5.63542e-16	-0.369619	-0.486 to -0.255
M-HDL-FC	Free cholesterol in medium HDL	-0.0423885	-0.08 to -0.005	0.0270756	0.10626	-0.0422815	-0.08 to -0.004	-0.287307	-0.373 to -0.201	1.5221e-10	3.76345e-10	-0.287101	-0.399 to -0.171
M-HDL-TG	Triglycerides in medium HDL	0.0518231	0.014 to 0.089	0.00722412	0.0625165	0.0511774	0.016 to 0.087	0.400812	0.313 to 0.489	9.73337e-18	4.65959e-17	0.404066	0.316 to 0.487
S-HDL-P	Concentration of small HDL particles	-0.00631268	-0.044 to 0.032	0.744266	0.878793	-0.00700023	-0.049 to 0.032	-0.192464	-0.284 to -0.101	4.63459e-05	7.84047e-05	-0.191652	-0.309 to -0.089
S-HDL-L	Total lipids in small HDL	-0.012043	-0.05 to 0.026	0.535699	0.713209	-0.0134172	-0.055 to 0.03	-0.209544	-0.301 to -0.118	9.43987e-06	1.72681e-05	-0.209663	-0.331 to -0.105
S-HDL-PL	Phospholipids in small HDL	-0.0230152	-0.061 to 0.015	0.236541	0.43499	-0.0234427	-0.066 to 0.015	-0.226549	-0.319 to -0.134	1.97916e-06	3.90624e-06	-0.222009	-0.356 to -0.118
S-HDL-C	Cholesterol in small HDL	-0.00440046	-0.045 to 0.036	0.83205	0.925077	-0.00495444	-0.05 to 0.039	-0.173471	-0.269 to -0.078	0.000427415	0.000645425	-0.171968	-0.269 to -0.082
S-HDL-CE	Cholesteryl esters in small HDL	0.00300875	-0.039 to 0.045	0.888161	0.942623	0.00309444	-0.041 to 0.052	-0.127069	-0.225 to -0.029	0.0115708	0.0142264	-0.127362	-0.21 to -0.036
S-HDL-FC	Free cholesterol in small HDL	-0.0327846	-0.071 to 0.005	0.0922141	0.241258	-0.0324633	-0.075 to 0.011	-0.270365	-0.36 to -0.181	5.84712e-09	1.35629e-08	-0.269315	-0.383 to -0.154
S-HDL-TG	Triglycerides in small HDL	0.0594464	0.022 to 0.097	0.00199184	0.024898	0.0595238	0.019 to 0.097	0.462451	0.379 to 0.546	1.07057e-24	1.0473e-23	0.461414	0.377 to 0.543
XXL-VLDL-PL %	Phospholipids to total lipids ratio in chylomicrons and extremely large VLDL	-0.015499	-0.063 to 0.032	0.522397	0.699639	-0.0159907	-0.054 to 0.025	0.0772886	-0.035 to 0.189	0.177194	0.202379	0.0727451	-0.025 to 0.208
XXL-VLDL-C %	Cholesterol to total lipids ratio in chylomicrons and extremely large VLDL	0.0364216	-0.011 to 0.084	0.13671	0.320415	0.0386555	-0.013 to 0.082	0.419058	0.316 to 0.523	3.58413e-14	1.20363e-13	0.416601	0.323 to 0.535
XXL-VLDL-CE %	Cholesteryl esters to total lipids ratio in chylomicrons and extremely large VLDL	0.0446898	-0.005 to 0.095	0.0800563	0.214436	0.0443785	-0.012 to 0.092	0.387422	0.278 to 0.496	1.83418e-11	4.79872e-11	0.387049	0.284 to 0.497
XXL-VLDL-FC %	Free cholesterol to total lipids ratio in chylomicrons and extremely large VLDL	-0.0110432	-0.059 to 0.037	0.652214	0.81076	-0.010812	-0.057 to 0.029	0.197237	0.081 to 0.313	0.000956229	0.00136172	0.193178	0.066 to 0.337
XXL-VLDL-TG %	Triglycerides to total lipids ratio in chylomicrons and extremely large VLDL	-0.0322514	-0.076 to 0.011	0.145351	0.330342	-0.0328326	-0.078 to 0.011	-0.386186	-0.48 to -0.293	1.3011e-14	4.57418e-14	-0.384239	-0.484 to -0.291
XL-VLDL-PL %	Phospholipids to total lipids ratio in very large VLDL	0.0338958	-0.013 to 0.081	0.159555	0.351959	0.0321532	-0.013 to 0.09	0.326977	0.217 to 0.437	1.30943e-08	2.91705e-08	0.325658	0.225 to 0.423
XL-VLDL-C %	Cholesterol to total lipids ratio in very large VLDL	0.00920616	-0.036 to 0.054	0.687893	0.84577	0.0110443	-0.032 to 0.048	0.182589	0.074 to 0.291	0.0011223	0.00157824	0.183901	0.081 to 0.277
XL-VLDL-CE %	Cholesteryl esters to total lipids ratio in very large VLDL	0.000392238	-0.044 to 0.045	0.986226	0.995071	0.0016175	-0.039 to 0.041	-0.0163075	-0.126 to 0.093	0.770633	0.791746	-0.010077	-0.132 to 0.092
XL-VLDL-FC %	Free cholesterol to total lipids ratio in very large VLDL	0.0210799	-0.027 to 0.069	0.389047	0.610586	0.0190128	-0.028 to 0.073	0.293092	0.178 to 0.408	8.83147e-07	1.79016e-06	0.291966	0.185 to 0.398
XL-VLDL-TG %	Triglycerides to total lipids ratio in very large VLDL	-0.0233673	-0.07 to 0.023	0.325649	0.546798	-0.0214939	-0.074 to 0.02	-0.366286	-0.476 to -0.256	2.63589e-10	6.37716e-10	-0.3661	-0.466 to -0.251
L-VLDL-PL %	Phospholipids to total lipids ratio in large VLDL	0.0284226	-0.014 to 0.07	0.186179	0.384315	0.0279515	-0.011 to 0.067	0.451652	0.358 to 0.545	2.19206e-19	1.23202e-18	0.449976	0.363 to 0.542
L-VLDL-C %	Cholesterol to total lipids ratio in large VLDL	0.0225111	-0.017 to 0.062	0.266459	0.470278	0.0244752	-0.018 to 0.063	0.309242	0.219 to 0.4	6.31646e-11	1.61501e-10	0.313979	0.216 to 0.393
L-VLDL-CE %	Cholesteryl esters to total lipids ratio in large VLDL	-0.00159135	-0.042 to 0.038	0.93782	0.976896	0.000720985	-0.045 to 0.037	-0.00203203	-0.1 to 0.096	0.967468	0.967468	-0.000180435	-0.108 to 0.108
L-VLDL-FC %	Free cholesterol to total lipids ratio in large VLDL	0.0251319	-0.018 to 0.068	0.251779	0.456857	0.0238157	-0.009 to 0.067	0.26207	0.161 to 0.363	6.15026e-07	1.25801e-06	0.25675	0.171 to 0.375
L-VLDL-TG %	Triglycerides to total lipids ratio in large VLDL	-0.0271937	-0.067 to 0.013	0.185049	0.384315	-0.0264741	-0.067 to 0.011	-0.410166	-0.5 to -0.321	9.41595e-18	4.60563e-17	-0.411573	-0.496 to -0.326
M-VLDL-PL %	Phospholipids to total lipids ratio in medium VLDL	-0.0272174	-0.063 to 0.009	0.139305	0.323129	-0.0269679	-0.066 to 0.005	-0.146218	-0.24 to -0.053	0.00229848	0.00311541	-0.148402	-0.245 to -0.043
M-VLDL-C %	Cholesterol to total lipids ratio in medium VLDL	0.0281332	-0.007 to 0.063	0.114182	0.285456	0.0282144	-0.008 to 0.059	0.38556	0.299 to 0.472	6.35563e-17	2.9184e-16	0.388147	0.296 to 0.482
M-VLDL-CE %	Cholesteryl esters to total lipids ratio in medium VLDL	0.0123559	-0.023 to 0.048	0.498505	0.683925	0.0126611	-0.022 to 0.048	0.248852	0.159 to 0.339	8.99835e-08	1.87466e-07	0.249197	0.145 to 0.342
M-VLDL-FC %	Free cholesterol to total lipids ratio in medium VLDL	0.0439594	0.007 to 0.081	0.0200738	0.100369	0.0439017	0.014 to 0.086	0.391612	0.298 to 0.485	1.88017e-15	7.05062e-15	0.395693	0.269 to 0.506
M-VLDL-TG %	Triglycerides to total lipids ratio in medium VLDL	-0.0225628	-0.058 to 0.013	0.212558	0.415428	-0.0231022	-0.057 to 0.015	-0.33013	-0.416 to -0.245	2.21136e-13	7.00783e-13	-0.331139	-0.431 to -0.241
S-VLDL-PL %	Phospholipids to total lipids ratio in small VLDL	-0.0575996	-0.096 to -0.019	0.00369461	0.036143	-0.0574956	-0.099 to -0.019	-0.500576	-0.584 to -0.418	2.76287e-28	4.1443e-27	-0.500695	-0.586 to -0.403
S-VLDL-C %	Cholesterol to total lipids ratio in small VLDL	0.00945671	-0.028 to 0.047	0.622173	0.790898	0.009906	-0.033 to 0.047	0.202203	0.112 to 0.293	1.51212e-05	2.65803e-05	0.205526	0.109 to 0.284
S-VLDL-CE %	Cholesteryl esters to total lipids ratio in small VLDL	0.00545131	-0.034 to 0.045	0.787487	0.908639	0.00614175	-0.04 to 0.043	0.180462	0.085 to 0.276	0.000253577	0.000393482	0.181934	0.083 to 0.279
S-VLDL-FC %	Free cholesterol to total lipids ratio in small VLDL	0.0203696	-0.017 to 0.058	0.286983	0.49291	0.0200756	-0.015 to 0.061	0.122756	0.034 to 0.211	0.00680777	0.00860532	0.124016	0.025 to 0.198
S-VLDL-TG %	Triglycerides to total lipids ratio in small VLDL	0.00940335	-0.027 to 0.046	0.612683	0.78326	0.00821877	-0.029 to 0.048	-0.0534936	-0.144 to 0.037	0.247654	0.275853	-0.0550384	-0.142 to 0.038
XS-VLDL-PL %	Phospholipids to total lipids ratio in very small VLDL	-0.00999717	-0.052 to 0.032	0.637417	0.805724	-0.0106455	-0.055 to 0.04	-0.166398	-0.265 to -0.067	0.00106813	0.00151151	-0.166924	-0.256 to -0.069
XS-VLDL-C %	Cholesterol to total lipids ratio in very small VLDL	-0.0511188	-0.088 to -0.015	0.00636342	0.0572708	-0.0508042	-0.093 to -0.015	-0.0451177	-0.141 to 0.051	0.356596	0.383895	-0.0423573	-0.158 to 0.044
XS-VLDL-CE %	Cholesteryl esters to total lipids ratio in very small VLDL	-0.0428592	-0.081 to -0.005	0.0266657	0.10626	-0.0424543	-0.079 to -0.004	-0.0092721	-0.105 to 0.087	0.850038	0.869358	-0.008567	-0.117 to 0.099
XS-VLDL-FC %	Free cholesterol to total lipids ratio in very small VLDL	-0.0396541	-0.08 to 0.001	0.0544191	0.165463	-0.0390637	-0.088 to 0	-0.085767	-0.186 to 0.014	0.0926833	0.108613	-0.0851871	-0.193 to 0.001
XS-VLDL-TG %	Triglycerides to total lipids ratio in very small VLDL	0.046784	0.011 to 0.083	0.0109996	0.0785411	0.0465267	0.003 to 0.086	0.144233	0.052 to 0.237	0.00243259	0.00327744	0.144602	0.047 to 0.242
IDL-PL %	Phospholipids to total lipids ratio in IDL	0.000847216	-0.039 to 0.041	0.966899	0.988874	0.00220604	-0.042 to 0.048	-0.394201	-0.484 to -0.305	9.31451e-17	4.19153e-16	-0.396742	-0.501 to -0.288
IDL-C %	Cholesterol to total lipids ratio in IDL	-0.0381524	-0.074 to -0.003	0.036143	0.128113	-0.038205	-0.082 to 0.006	-0.032355	-0.126 to 0.061	0.498147	0.523752	-0.0300021	-0.141 to 0.076
IDL-CE %	Cholesteryl esters to total lipids ratio in IDL	-0.0417807	-0.078 to -0.005	0.0249128	0.10626	-0.0424444	-0.083 to 0	0.056753	-0.038 to 0.151	0.238977	0.267512	0.056671	-0.06 to 0.193
IDL-FC %	Free cholesterol to total lipids ratio in IDL	-0.0135726	-0.053 to 0.025	0.494921	0.683925	-0.013093	-0.059 to 0.042	-0.176341	-0.275 to -0.078	0.000486093	0.00072914	-0.17541	-0.271 to -0.087
IDL-TG %	Triglycerides to total lipids ratio in IDL	0.0440803	0.008 to 0.08	0.0163271	0.0874667	0.0454402	0.002 to 0.085	0.210549	0.12 to 0.301	6.27665e-06	1.18676e-05	0.212236	0.113 to 0.309
L-LDL-PL %	Phospholipids to total lipids ratio in large LDL	-0.0174675	-0.055 to 0.02	0.363498	0.58433	-0.0176062	-0.072 to 0.023	-0.250003	-0.34 to -0.16	7.92035e-08	1.66549e-07	-0.251401	-0.338 to -0.165
L-LDL-C %	Cholesterol to total lipids ratio in large LDL	-0.00227989	-0.04 to 0.035	0.905013	0.956	0.00130198	-0.048 to 0.05	0.0626373	-0.031 to 0.157	0.192792	0.217981	0.0547915	-0.02 to 0.164
L-LDL-CE %	Cholesteryl esters to total lipids ratio in large LDL	0.00722217	-0.03 to 0.045	0.705223	0.861552	0.0103557	-0.036 to 0.066	0.134457	0.044 to 0.225	0.00381675	0.00493546	0.126246	0.06 to 0.229
L-LDL-FC %	Free cholesterol to total lipids ratio in large LDL	-0.0412224	-0.081 to -0.002	0.0413237	0.137118	-0.03902	-0.087 to 0.002	-0.423215	-0.509 to -0.338	2.64288e-20	1.56487e-19	-0.421533	-0.513 to -0.332
L-LDL-TG %	Triglycerides to total lipids ratio in large LDL	0.0322173	-0.004 to 0.068	0.0820717	0.217249	0.0325956	-0.009 to 0.074	0.167694	0.077 to 0.258	0.000326946	0.000503855	0.167632	0.071 to 0.267
M-LDL-PL %	Phospholipids to total lipids ratio in medium LDL	0.00727456	-0.032 to 0.047	0.719351	0.866835	0.00748618	-0.038 to 0.047	-0.168577	-0.266 to -0.071	0.000764987	0.00111768	-0.163722	-0.268 to -0.072
M-LDL-C %	Cholesterol to total lipids ratio in medium LDL	-0.0129502	-0.051 to 0.025	0.503266	0.686272	-0.0149806	-0.052 to 0.031	0.0526296	-0.043 to 0.148	0.282172	0.306709	0.0500395	-0.053 to 0.145
M-LDL-CE %	Cholesteryl esters to total lipids ratio in medium LDL	0.00404571	-0.032 to 0.04	0.826559	0.925077	0.00294124	-0.032 to 0.057	0.0620771	-0.039 to 0.163	0.230632	0.259461	0.0601345	-0.124 to 0.154
M-LDL-FC %	Free cholesterol to total lipids ratio in medium LDL	-0.0133878	-0.054 to 0.027	0.520786	0.699639	-0.0107147	-0.064 to 0.028	-0.319473	-0.414 to -0.225	1.10136e-10	2.7534e-10	-0.318671	-0.419 to -0.217
M-LDL-TG %	Triglycerides to total lipids ratio in medium LDL	0.0467991	0.01 to 0.084	0.0133432	0.0829022	0.0464695	0.008 to 0.095	0.144334	0.052 to 0.237	0.00227784	0.00310614	0.143648	0.042 to 0.252
S-LDL-PL %	Phospholipids to total lipids ratio in small LDL	0.00318284	-0.037 to 0.043	0.875196	0.933552	0.00412905	-0.043 to 0.046	-0.227575	-0.324 to -0.131	4.81307e-06	9.17747e-06	-0.224161	-0.332 to -0.124
S-LDL-C %	Cholesterol to total lipids ratio in small LDL	-0.0145668	-0.053 to 0.024	0.462875	0.663355	-0.0156435	-0.055 to 0.032	0.0744276	-0.023 to 0.172	0.134029	0.15386	0.0738278	-0.029 to 0.176
S-LDL-CE %	Cholesteryl esters to total lipids ratio in small LDL	-0.00732317	-0.047 to 0.033	0.720436	0.866835	-0.00878582	-0.046 to 0.043	0.113264	0.013 to 0.214	0.0275517	0.0335088	0.111958	0.005 to 0.206
S-LDL-FC %	Free cholesterol to total lipids ratio in small LDL	-0.0268838	-0.068 to 0.014	0.19833	0.405675	-0.0260378	-0.079 to 0.017	-0.330545	-0.424 to -0.237	1.22475e-11	3.24198e-11	-0.329335	-0.418 to -0.229
S-LDL-TG %	Triglycerides to total lipids ratio in small LDL	0.057919	0.02 to 0.096	0.00301619	0.0323163	0.0568796	0.015 to 0.1	0.275363	0.184 to 0.367	7.68937e-09	1.76542e-08	0.274452	0.184 to 0.386
XL-HDL-PL %	Phospholipids to total lipids ratio in very large HDL	-0.000671229	-0.042 to 0.041	0.97468	0.991755	0.000175714	-0.05 to 0.037	-0.148411	-0.246 to -0.051	0.00290072	0.00383919	-0.143382	-0.285 to -0.041
XL-HDL-C %	Cholesterol to total lipids ratio in very large HDL	-0.0232278	-0.063 to 0.017	0.255814	0.460466	-0.0235706	-0.063 to 0.017	-0.0197518	-0.118 to 0.079	0.694654	0.716959	-0.0244034	-0.162 to 0.089
XL-HDL-CE %	Cholesteryl esters to total lipids ratio in very large HDL	-0.0144038	-0.054 to 0.025	0.475761	0.669039	-0.0154431	-0.055 to 0.03	0.0363414	-0.061 to 0.134	0.465429	0.49165	0.0359079	-0.101 to 0.143
XL-HDL-FC %	Free cholesterol to total lipids ratio in very large HDL	-0.0573845	-0.1 to -0.015	0.00888108	0.0684864	-0.0569419	-0.102 to -0.015	-0.153193	-0.255 to -0.051	0.003409	0.00445944	-0.150178	-0.318 to 0.009
XL-HDL-TG %	Triglycerides to total lipids ratio in very large HDL	0.0677944	0.026 to 0.109	0.00138721	0.0222944	0.0671797	0.028 to 0.113	0.50154	0.416 to 0.587	4.56539e-27	6.04243e-26	0.502384	0.42 to 0.589
L-HDL-PL %	Phospholipids to total lipids ratio in large HDL	0.03515	0 to 0.071	0.0528699	0.162955	0.0340105	-0.002 to 0.08	0.0848228	-0.002 to 0.172	0.0570081	0.0678668	0.0854759	-0.011 to 0.192
L-HDL-C %	Cholesterol to total lipids ratio in large HDL	-0.0589583	-0.096 to -0.022	0.00187325	0.024793	-0.0584826	-0.109 to -0.023	-0.353605	-0.439 to -0.269	3.41473e-15	1.23922e-14	-0.351659	-0.466 to -0.263
L-HDL-CE %	Cholesteryl esters to total lipids ratio in large HDL	-0.0451744	-0.083 to -0.008	0.0189452	0.0968787	-0.0443473	-0.086 to -0.008	-0.25932	-0.349 to -0.169	2.89392e-08	6.26089e-08	-0.25988	-0.38 to -0.165
L-HDL-FC %	Free cholesterol to total lipids ratio in large HDL	-0.0707463	-0.108 to -0.033	0.000260911	0.0051885	-0.0700277	-0.113 to -0.033	-0.408055	-0.49 to -0.326	1.38269e-20	8.40823e-20	-0.40663	-0.51 to -0.319
L-HDL-TG %	Triglycerides to total lipids ratio in large HDL	0.0341762	-0.006 to 0.074	0.0953566	0.246612	0.0339899	-0.009 to 0.076	0.459469	0.374 to 0.545	2.92707e-23	2.43922e-22	0.459669	0.374 to 0.546
M-HDL-PL %	Phospholipids to total lipids ratio in medium HDL	0.0464374	0.006 to 0.086	0.0233682	0.105157	0.0459229	0.006 to 0.089	0.405059	0.317 to 0.493	3.81905e-18	1.90952e-17	0.403125	0.3 to 0.517
M-HDL-C %	Cholesterol to total lipids ratio in medium HDL	-0.0629007	-0.102 to -0.024	0.00157165	0.0235747	-0.0628265	-0.105 to -0.023	-0.515916	-0.595 to -0.437	1.62782e-32	3.6626e-31	-0.513899	-0.613 to -0.425
M-HDL-CE %	Cholesteryl esters to total lipids ratio in medium HDL	-0.0613464	-0.1 to -0.022	0.00222105	0.0263019	-0.0615752	-0.103 to -0.019	-0.530661	-0.61 to -0.451	3.02406e-33	9.72018e-32	-0.529127	-0.626 to -0.439
M-HDL-FC %	Free cholesterol to total lipids ratio in medium HDL	-0.0463599	-0.083 to -0.01	0.0137107	0.0829022	-0.0471667	-0.086 to -0.009	-0.28663	-0.369 to -0.205	2.39522e-11	6.19453e-11	-0.287844	-0.39 to -0.162
M-HDL-TG %	Triglycerides to total lipids ratio in medium HDL	0.0722222	0.035 to 0.109	0.000149419	0.00373548	0.0726569	0.038 to 0.113	0.538144	0.462 to 0.614	1.08603e-36	8.14525e-35	0.536833	0.453 to 0.636
S-HDL-PL %	Phospholipids to total lipids ratio in small HDL	-0.0240794	-0.064 to 0.016	0.236995	0.43499	-0.0253001	-0.07 to 0.02	-0.0566448	-0.153 to 0.04	0.251254	0.277118	-0.0567973	-0.169 to 0.041
S-HDL-C %	Cholesterol to total lipids ratio in small HDL	0.00679501	-0.035 to 0.048	0.749202	0.878793	0.00686455	-0.038 to 0.055	-0.0792407	-0.178 to 0.02	0.11686	0.135533	-0.0795829	-0.176 to 0.026
S-HDL-CE %	Cholesteryl esters to total lipids ratio in small HDL	0.0121016	-0.03 to 0.055	0.577668	0.743011	0.0137084	-0.033 to 0.066	-0.0501113	-0.15 to 0.05	0.326982	0.353707	-0.0500068	-0.146 to 0.06
S-HDL-FC %	Free cholesterol to total lipids ratio in small HDL	-0.046202	-0.087 to -0.006	0.0258477	0.10626	-0.0465087	-0.092 to 0.001	-0.167142	-0.264 to -0.07	0.000782787	0.00112183	-0.169029	-0.285 to -0.055
S-HDL-TG %	Triglycerides to total lipids ratio in small HDL	0.0618497	0.023 to 0.1	0.00168988	0.0237639	0.0613448	0.024 to 0.105	0.529413	0.45 to 0.609	4.45193e-33	1.25211e-31	0.52927	0.441 to 0.618
VLDL particle size	Average diameter for VLDL particles	0.0300356	-0.007 to 0.067	0.115878	0.286511	0.029839	-0.008 to 0.072	0.267851	0.178 to 0.358	9.16457e-09	2.08286e-08	0.265734	0.18 to 0.36
LDL particle size	Average diameter for LDL particles	0.0273374	-0.012 to 0.067	0.175241	0.371973	0.0283045	-0.019 to 0.071	0.129151	0.034 to 0.224	0.00779163	0.00973953	0.133323	0.018 to 0.233
HDL particle size	Average diameter for HDL particles	-0.0515656	-0.085 to -0.018	0.00262917	0.0295782	-0.0516497	-0.082 to -0.021	-0.144846	-0.226 to -0.064	0.0004991	0.000743692	-0.147133	-0.238 to -0.038
Total-C	Total cholesterol	-0.0137852	-0.049 to 0.021	0.442335	0.6565	-0.0138939	-0.052 to 0.026	0.133028	0.046 to 0.22	0.00281173	0.00374343	0.13286	0.033 to 0.237
VLDL-C	VLDL cholesterol	0.0292327	-0.007 to 0.065	0.112736	0.285007	0.0291961	-0.008 to 0.064	0.481242	0.404 to 0.559	8.58083e-30	1.37906e-28	0.482604	0.399 to 0.555
Remnant-C	Remnant cholesterol (non-HDL, non-LDL -cholesterol)	0.0167558	-0.018 to 0.052	0.349718	0.574355	0.0168048	-0.021 to 0.055	0.381296	0.302 to 0.461	2.24501e-19	1.23202e-18	0.381808	0.299 to 0.467
LDL-C	LDL cholesterol	0.00361852	-0.031 to 0.038	0.838532	0.925077	0.00173459	-0.034 to 0.046	0.156426	0.07 to 0.242	0.000399352	0.000611253	0.155268	0.063 to 0.253
HDL-C	HDL cholesterol	-0.0571112	-0.092 to -0.023	0.00126357	0.0218695	-0.0577937	-0.089 to -0.021	-0.322141	-0.401 to -0.244	8.03213e-15	2.86862e-14	-0.322246	-0.416 to -0.209
Total triglycerides	Total triglycerides	0.0385002	0 to 0.077	0.0487066	0.154352	0.0389986	-0.001 to 0.08	0.478076	0.395 to 0.561	2.69347e-26	3.36684e-25	0.477083	0.393 to 0.556
VLDL-TG	Triglycerides in VLDL	0.0350617	-0.003 to 0.073	0.0694047	0.197672	0.0350418	-0.003 to 0.076	0.430003	0.345 to 0.515	2.66452e-21	1.74903e-20	0.429669	0.346 to 0.51
LDL-TG	Triglycerides in LDL	0.0329637	-0.003 to 0.069	0.0704484	0.198136	0.0330932	-0.003 to 0.071	0.425394	0.348 to 0.502	1.65155e-24	1.54833e-23	0.424159	0.339 to 0.512
HDL-TG	Triglycerides in HDL	0.0436841	0.005 to 0.082	0.0261113	0.10626	0.0431401	0.001 to 0.08	0.448918	0.364 to 0.534	1.27334e-22	9.43834e-22	0.449733	0.371 to 0.526
Phosphoglycerides	Phosphoglycerides	-0.0285812	-0.064 to 0.007	0.119369	0.291936	-0.0291392	-0.066 to 0.012	0.12903	0.041 to 0.217	0.00415518	0.00534238	0.128598	0.021 to 0.259
TG/PG	Ratio of triglycerides to phosphoglycerides	0.0476349	0.009 to 0.086	0.0150926	0.0829022	0.0466804	0.008 to 0.091	0.528382	0.448 to 0.609	1.04012e-32	2.60029e-31	0.53215	0.438 to 0.596
Phosphatidylcholines	Phosphatidylcholines	-0.0137708	-0.051 to 0.024	0.472023	0.667956	-0.0148019	-0.058 to 0.028	0.264821	0.176 to 0.354	1.02492e-08	2.30607e-08	0.264167	0.162 to 0.402
Sphingomyelins	Sphingomyelins	-0.0353735	-0.069 to -0.002	0.0404259	0.137118	-0.0355574	-0.075 to -0.001	0.0370631	-0.048 to 0.123	0.395747	0.424015	0.0376229	-0.052 to 0.13
Total cholines	Total cholines	-0.0207207	-0.057 to 0.015	0.260502	0.465181	-0.0212189	-0.062 to 0.018	0.206179	0.119 to 0.293	4.47255e-06	8.60106e-06	0.206724	0.114 to 0.329
ApoA1	Apolipoprotein A1	-0.0476748	-0.083 to -0.012	0.00913152	0.0684864	-0.0474229	-0.089 to -0.016	-0.170359	-0.257 to -0.084	0.000132051	0.000210719	-0.166569	-0.289 to -0.059
ApoB	Apolipoprotein B	0.0195188	-0.015 to 0.054	0.269155	0.470278	0.0189288	-0.016 to 0.059	0.363699	0.285 to 0.442	2.77457e-18	1.45181e-17	0.36746	0.284 to 0.451
ApoB/ApoA1	Ratio of apolipoprotein B to apolipoprotein A1	0.0440764	0.01 to 0.078	0.0111703	0.0785411	0.0445907	0.008 to 0.078	0.460521	0.389 to 0.532	9.01758e-32	1.6908e-30	0.463072	0.382 to 0.531
Total fatty acids	Total fatty acids	-0.00435134	-0.042 to 0.033	0.81865	0.925077	-0.00434783	-0.048 to 0.031	0.369297	0.285 to 0.454	1.72429e-16	6.92795e-16	0.3732	0.268 to 0.467
Unsaturation	Degree of unsaturation	0.00873818	-0.03 to 0.047	0.655815	0.81076	0.00913275	-0.033 to 0.046	-0.121004	-0.214 to -0.028	0.0108809	0.0134517	-0.123606	-0.215 to -0.018
DHA	Docosahexaenoic acid	-0.0234842	-0.055 to 0.008	0.143321	0.329053	-0.0230477	-0.053 to 0.007	-0.0846684	-0.163 to -0.006	0.0345978	0.0418521	-0.08572	-0.157 to -0.015
LA	Linoleic acid	-0.0140785	-0.052 to 0.023	0.46191	0.663355	-0.0128702	-0.059 to 0.019	0.204603	0.114 to 0.295	1.15695e-05	2.06598e-05	0.20767	0.084 to 0.326
Omega-3	Omega-3 fatty acids	-0.0233836	-0.059 to 0.012	0.201979	0.409213	-0.0223211	-0.06 to 0.009	0.120928	0.033 to 0.209	0.00738675	0.00928502	0.123705	0.027 to 0.204
Omega-6	Omega-6 fatty acids	-0.0140498	-0.05 to 0.022	0.449338	0.6565	-0.0141147	-0.054 to 0.022	0.210626	0.123 to 0.298	3.48955e-06	6.76852e-06	0.212067	0.102 to 0.318
PUFA	Polyunsaturated fatty acids	-0.0158266	-0.052 to 0.02	0.390775	0.610586	-0.0156044	-0.057 to 0.022	0.203132	0.116 to 0.291	6.89306e-06	1.29245e-05	0.204284	0.103 to 0.315
MUFA	Monounsaturated fatty acids	0.0270713	-0.012 to 0.067	0.180107	0.378729	0.0270863	-0.017 to 0.069	0.544605	0.464 to 0.625	5.91006e-34	2.65953e-32	0.544021	0.469 to 0.645
SFA	Saturated fatty acids	-0.02234	-0.059 to 0.014	0.231995	0.43499	-0.0222053	-0.064 to 0.015	0.251937	0.165 to 0.339	2.73901e-08	5.98327e-08	0.247608	0.162 to 0.351
DHA %	Ratio of docosahexaenoic acid to total fatty acids	-0.0273046	-0.06 to 0.006	0.10631	0.271816	-0.0265463	-0.062 to 0.005	-0.22836	-0.308 to -0.149	3.1719e-08	6.73281e-08	-0.22672	-0.313 to -0.153
LA %	Ratio of linoleic acid to total fatty acids	-0.0202562	-0.061 to 0.021	0.335798	0.555548	-0.0185887	-0.065 to 0.021	-0.149254	-0.249 to -0.05	0.00353184	0.00459344	-0.148061	-0.264 to -0.037
Omega-3 %	Ratio of omega-3 fatty acids to total fatty acids	-0.0268254	-0.064 to 0.01	0.15436	0.344005	-0.0254951	-0.063 to 0.012	-0.121336	-0.211 to -0.031	0.00858823	0.010676	-0.117921	-0.241 to -0.026
Omega-6 %	Ratio of omega-6 fatty acids to total fatty acids	-0.0258552	-0.067 to 0.015	0.219838	0.422766	-0.0248204	-0.072 to 0.018	-0.301602	-0.397 to -0.206	1.4712e-09	3.48441e-09	-0.29875	-0.419 to -0.206
PUFA %	Ratio of polyunsaturated fatty acids to total fatty acids	-0.0297458	-0.071 to 0.011	0.15442	0.344005	-0.0290886	-0.076 to 0.016	-0.304968	-0.4 to -0.21	8.7872e-10	2.10332e-09	-0.302954	-0.407 to -0.213
MUFA %	Ratio of monounsaturated fatty acids to total fatty acids	0.0724257	0.034 to 0.111	0.000228178	0.00513399	0.0723353	0.023 to 0.114	0.580343	0.505 to 0.656	1.50599e-41	1.69424e-39	0.579699	0.494 to 0.673
SFA %	Ratio of saturated fatty acids to total fatty acids	-0.0572402	-0.095 to -0.019	0.00326074	0.0333484	-0.0568915	-0.097 to -0.018	-0.35369	-0.441 to -0.266	2.03237e-14	7.03514e-14	-0.353661	-0.46 to -0.262
Glucose	Glucose	-0.00612023	-0.033 to 0.021	0.6538	0.81076	-0.00661763	-0.045 to 0.02	0.0132159	-0.052 to 0.079	0.692995	0.716959	0.0130006	-0.049 to 0.077
Lactate	Lactate	-0.00863782	-0.026 to 0.009	0.33163	0.552717	-0.00794899	-0.038 to 0.014	-0.0810593	-0.122 to -0.04	0.000125006	0.000200902	-0.078602	-0.158 to -0.024
Pyruvate	Pyruvate	0.00798039	-0.014 to 0.03	0.482141	0.673799	0.00854213	-0.022 to 0.03	0.0632285	0.009 to 0.118	0.0232821	0.02847	0.0649182	-0.009 to 0.123
Citrate	Citrate	-0.0525059	-0.092 to -0.013	0.00888149	0.0684864	-0.0528046	-0.086 to -0.012	-0.187868	-0.282 to -0.093	0.000112621	0.000183621	-0.186259	-0.288 to -0.081
Glycerol	Glycerol	-0.0135229	-0.059 to 0.032	0.561901	0.736056	-0.0114952	-0.059 to 0.03	-0.00762972	-0.126 to 0.11	0.899198	0.907262	-0.000237372	-0.134 to 0.103
Alanine	Alanine	-0.0158436	-0.046 to 0.014	0.302636	0.511977	-0.015612	-0.048 to 0.012	-0.0766161	-0.148 to -0.005	0.0370466	0.0445747	-0.0766777	-0.159 to -0.006
Glutamine	Glutamine	-0.052	-0.088 to -0.016	0.00522386	0.0489737	-0.0507449	-0.094 to -0.011	-0.0526989	-0.143 to 0.038	0.253059	0.277747	-0.052002	-0.153 to 0.053
Glycine	Glycine	0.0242583	-0.01 to 0.059	0.166092	0.362823	0.0242635	-0.012 to 0.07	0.13177	0.052 to 0.212	0.00130226	0.00180869	0.132194	0.02 to 0.226
Histidine	Histidine	-0.0302165	-0.063 to 0.003	0.0732319	0.200941	-0.0289276	-0.064 to 0.001	-0.159855	-0.24 to -0.08	9.99432e-05	0.000166572	-0.158885	-0.248 to -0.076
Isoleucine	Isoleucine	0.04078	0.003 to 0.079	0.0346765	0.125842	0.0407588	0 to 0.081	0.160598	0.069 to 0.252	0.000633546	0.000931685	0.162119	0.065 to 0.253
Leucine	Leucine	0.0224481	-0.014 to 0.059	0.227264	0.429702	0.0232076	-0.018 to 0.062	0.0753797	-0.014 to 0.165	0.100053	0.116642	0.0774035	-0.024 to 0.162
Valine	Valine	0.0199033	-0.016 to 0.056	0.273872	0.47401	0.0198142	-0.02 to 0.06	0.00678963	-0.08 to 0.093	0.877993	0.889858	0.00928703	-0.088 to 0.085
Phenylalanine	Phenylalanine	0.0725113	0.037 to 0.108	7.69851e-05	0.002751	0.073049	0.039 to 0.108	0.164983	0.079 to 0.251	0.00019284	0.000303419	0.163381	0.066 to 0.255
Tyrosine	Tyrosine	0.0287292	-0.008 to 0.066	0.127783	0.305864	0.0295115	-0.011 to 0.069	-0.00343263	-0.095 to 0.088	0.94124	0.945442	-0.000680691	-0.103 to 0.08
Acetate	Acetate	-0.00903221	-0.04 to 0.022	0.570088	0.741445	-0.010428	-0.038 to 0.027	-0.156648	-0.235 to -0.079	9.76004e-05	0.000163881	-0.157606	-0.236 to -0.074
Acetoacetate	Acetoacetate	-0.0361876	-0.074 to 0.002	0.0610564	0.182577	-0.0348059	-0.075 to -0.001	-0.205433	-0.296 to -0.115	1.08327e-05	1.95848e-05	-0.20217	-0.309 to -0.107
3-hydroxybutyrate	Beta-hydroxybutyrate	-0.0164499	-0.052 to 0.019	0.360154	0.58433	-0.0170984	-0.053 to 0.018	-0.0513508	-0.139 to 0.036	0.251033	0.277118	-0.0495032	-0.141 to 0.028
Creatinine	Creatinine	0.0302974	-0.009 to 0.069	0.127782	0.305864	0.0315012	-0.014 to 0.076	-0.0724161	-0.166 to 0.021	0.131302	0.151502	-0.0701012	-0.199 to 0.033
Albumin	Albumin	-0.00681249	-0.042 to 0.029	0.708387	0.861552	-0.00709322	-0.047 to 0.028	-0.0200215	-0.109 to 0.069	0.659949	0.687447	-0.0185847	-0.113 to 0.072
Glycoprotein acetyls	Glycoprotein acetyls	0.0892245	0.052 to 0.126	3.12929e-06	0.00070409	0.0890583	0.044 to 0.131	-	-	-	-	-	-
hsCRP	High sensitivity C-Reactive Protein	0.0722863	0.034 to 0.111	0.00027672	0.0051885	0.0712915	0.035 to 0.112	0.549005	0.467 to 0.631	1.03175e-33	3.86907e-32	0.549628	0.477 to 0.623
Regression coefficients (β) are estimated difference in log metabolomic measure at 12 months of age (SD units) (adjusted for 6-month metabolomic measure) per 1 increase in total parent-reported infections from birth to 12 months of age (adjusted for number of infections from birth to 6 months), or per 1 SD increase in 12-month log GlycA (adjusted for 6-month GlycA).
Models are adjusted for infant sex, birth weight z-score, gestational age, exact age at 6-month and 12-month time point, maternal household income, exposure to any breastfeeding, exposure to any maternal smoking during pregnancy, and 6-month and 12-month blood sample processing time.
Adjusted p-values are based on the Benjamini-Hochberg method of adjustment for multiple comparisons.
Bootstrap estimates are calculated as the mean coefficent across 1000 iterations of bootstrap resampling.
Bootstrap 95% confidence intervals are bias-corrected accelerated percentile confidence intervals.
