# Supplementary material for: Early life infection and proinflammatory, atherogenic metabolomic and lipidomic profiles in infancy: a population-based cohort study
Source: eLife. 2022 May 10;11:e75170. doi: 10.7554/eLife.75170 (PMC9090335; doi:10.7554/eLife.75170)
Supplement: Figure 4—source data 1. [file elife-75170-fig4-data1.xlsx]

## Sheet: Figure 4 - Source Data 1
Figure 4 - Source Data 1. Summary of regression models for difference in 12-month NMR metabolomic measures per SD increase in 12-month log hsCRP.
		12-month hsCRP
Measure	Description	Estimate (β)	95% Confidence Interval	P-value	Adj. P-value	Bootstrap Estimate	Bootstrap 95% Confidence Interval
XXL-VLDL-P	Concentration of chylomicrons and extremely large VLDL particles	-0.0961977	-0.182 to -0.011	0.0275377	0.0643482	-0.0991055	-0.174 to -0.002
XXL-VLDL-L	Total lipids in chylomicrons and extremely large VLDL	-0.093464	-0.179 to -0.008	0.0323204	0.0740137	-0.0934222	-0.174 to -0.008
XXL-VLDL-PL	Phospholipids in chylomicrons and extremely large VLDL	-0.0959701	-0.182 to -0.01	0.0283757	0.0656367	-0.0980309	-0.176 to -0.007
XXL-VLDL-C	Cholesterol in chylomicrons and extremely large VLDL	-0.0451116	-0.131 to 0.041	0.303403	0.430899	-0.0452121	-0.133 to 0.043
XXL-VLDL-CE	Cholesteryl esters in chylomicrons and extremely large VLDL	-0.0237337	-0.11 to 0.062	0.588144	0.708868	-0.0252319	-0.103 to 0.062
XXL-VLDL-FC	Free cholesterol in chylomicrons and extremely large VLDL	-0.0731499	-0.159 to 0.013	0.0949562	0.17308	-0.0751098	-0.159 to 0.006
XXL-VLDL-TG	Triglycerides in chylomicrons and extremely large VLDL	-0.100524	-0.186 to -0.015	0.0212446	0.0540556	-0.102788	-0.189 to -0.016
XL-VLDL-P	Concentration of very large VLDL particles	-0.0819424	-0.168 to 0.004	0.0617944	0.125229	-0.0839482	-0.17 to 0.005
XL-VLDL-L	Total lipids in very large VLDL	-0.0815038	-0.167 to 0.004	0.0631836	0.126921	-0.0839437	-0.161 to 0.003
XL-VLDL-PL	Phospholipids in very large VLDL	-0.0836924	-0.17 to 0.002	0.0566032	0.117546	-0.0847648	-0.169 to 0.009
XL-VLDL-C	Cholesterol in very large VLDL	-0.0677757	-0.154 to 0.018	0.123008	0.21503	-0.0673952	-0.154 to 0.025
XL-VLDL-CE	Cholesteryl esters in very large VLDL	-0.0602637	-0.146 to 0.026	0.17066	0.279151	-0.0599054	-0.156 to 0.024
XL-VLDL-FC	Free cholesterol in very large VLDL	-0.0838724	-0.17 to 0.002	0.0565214	0.117546	-0.0864749	-0.168 to 0.009
XL-VLDL-TG	Triglycerides in very large VLDL	-0.0839333	-0.17 to 0.002	0.055758	0.117546	-0.0854846	-0.16 to 0.005
L-VLDL-P	Concentration of large VLDL particles	-0.0629199	-0.149 to 0.023	0.151201	0.256303	-0.0610738	-0.151 to 0.024
L-VLDL-L	Total lipids in large VLDL	-0.0619841	-0.148 to 0.024	0.157396	0.259307	-0.0614993	-0.16 to 0.016
L-VLDL-PL	Phospholipids in large VLDL	-0.0521828	-0.138 to 0.034	0.234312	0.350703	-0.0540079	-0.138 to 0.04
L-VLDL-C	Cholesterol in large VLDL	-0.0523258	-0.138 to 0.034	0.232651	0.350506	-0.0513806	-0.137 to 0.052
L-VLDL-CE	Cholesteryl esters in large VLDL	-0.0424257	-0.128 to 0.043	0.332744	0.456278	-0.0439905	-0.129 to 0.049
L-VLDL-FC	Free cholesterol in large VLDL	-0.0649787	-0.151 to 0.021	0.139046	0.241223	-0.0659572	-0.155 to 0.03
L-VLDL-TG	Triglycerides in large VLDL	-0.0687227	-0.154 to 0.017	0.11683	0.207396	-0.0720873	-0.155 to 0.024
M-VLDL-P	Concentration of medium VLDL particles	-0.0338072	-0.12 to 0.052	0.441616	0.574602	-0.0331855	-0.115 to 0.058
M-VLDL-L	Total lipids in medium VLDL	-0.0305044	-0.117 to 0.056	0.487898	0.614201	-0.0309144	-0.107 to 0.065
M-VLDL-PL	Phospholipids in medium VLDL	-0.0239529	-0.11 to 0.062	0.586338	0.708868	-0.0263793	-0.113 to 0.066
M-VLDL-C	Cholesterol in medium VLDL	-0.00516202	-0.092 to 0.082	0.907276	0.957448	-0.00549125	-0.091 to 0.078
M-VLDL-CE	Cholesteryl esters in medium VLDL	0.00982621	-0.077 to 0.097	0.824388	0.909551	0.00956511	-0.084 to 0.105
M-VLDL-FC	Free cholesterol in medium VLDL	-0.0205023	-0.107 to 0.066	0.644083	0.768203	-0.0179058	-0.111 to 0.067
M-VLDL-TG	Triglycerides in medium VLDL	-0.0447798	-0.131 to 0.041	0.30671	0.430899	-0.0433947	-0.133 to 0.035
S-VLDL-P	Concentration of small VLDL particles	0.063761	-0.023 to 0.151	0.152215	0.256303	0.0659666	-0.033 to 0.178
S-VLDL-L	Total lipids in small VLDL	0.0641733	-0.023 to 0.151	0.149337	0.255211	0.0642088	-0.019 to 0.188
S-VLDL-PL	Phospholipids in small VLDL	0.0582408	-0.029 to 0.145	0.19004	0.302216	0.0578366	-0.03 to 0.193
S-VLDL-C	Cholesterol in small VLDL	0.0688242	-0.018 to 0.156	0.120247	0.21182	0.0697819	-0.018 to 0.204
S-VLDL-CE	Cholesteryl esters in small VLDL	0.0764067	-0.011 to 0.164	0.0863554	0.160776	0.0760801	-0.016 to 0.224
S-VLDL-FC	Free cholesterol in small VLDL	0.0650871	-0.022 to 0.152	0.142539	0.245425	0.0632262	-0.027 to 0.185
S-VLDL-TG	Triglycerides in small VLDL	0.059831	-0.027 to 0.147	0.179143	0.290948	0.0596224	-0.031 to 0.176
XS-VLDL-P	Concentration of very small VLDL particles	0.086893	0.002 to 0.171	0.0445354	0.0990155	0.0849127	-0.001 to 0.189
XS-VLDL-L	Total lipids in very small VLDL	0.0779945	-0.007 to 0.163	0.0716957	0.140328	0.0773894	-0.015 to 0.167
XS-VLDL-PL	Phospholipids in very small VLDL	0.0975067	0.013 to 0.183	0.0249699	0.060831	0.10076	0.001 to 0.188
XS-VLDL-C	Cholesterol in very small VLDL	0.0254529	-0.06 to 0.111	0.558897	0.684425	0.0248488	-0.058 to 0.115
XS-VLDL-CE	Cholesteryl esters in very small VLDL	0.00910361	-0.076 to 0.094	0.834185	0.914011	0.00959597	-0.08 to 0.099
XS-VLDL-FC	Free cholesterol in very small VLDL	0.0552103	-0.031 to 0.141	0.207674	0.319177	0.0529086	-0.039 to 0.149
XS-VLDL-TG	Triglycerides in very small VLDL	0.137947	0.053 to 0.223	0.00151285	0.00629895	0.13928	0.047 to 0.224
IDL-P	Concentration of IDL particles	0.0139738	-0.072 to 0.1	0.749683	0.870205	0.0122636	-0.08 to 0.117
IDL-L	Total lipids in IDL	0.00458469	-0.081 to 0.091	0.916775	0.958426	0.00420136	-0.094 to 0.101
IDL-PL	Phospholipids in IDL	-0.00197218	-0.088 to 0.084	0.964249	0.970204	-0.000643722	-0.091 to 0.089
IDL-C	Cholesterol in IDL	-0.0280815	-0.114 to 0.058	0.523936	0.649439	-0.0258302	-0.12 to 0.068
IDL-CE	Cholesteryl esters in IDL	-0.0427911	-0.129 to 0.043	0.331353	0.456278	-0.0444289	-0.138 to 0.057
IDL-FC	Free cholesterol in IDL	0.0108771	-0.076 to 0.097	0.805277	0.909551	0.0147235	-0.085 to 0.099
IDL-TG	Triglycerides in IDL	0.226632	0.146 to 0.307	4.86869e-08	6.96832e-07	0.227667	0.137 to 0.326
L-LDL-P	Concentration of large LDL particles	0.00188203	-0.085 to 0.088	0.965985	0.970204	0.00453485	-0.094 to 0.091
L-LDL-L	Total lipids in large LDL	-0.00376212	-0.09 to 0.083	0.932139	0.958426	-0.00452855	-0.106 to 0.085
L-LDL-PL	Phospholipids in large LDL	-0.0427533	-0.129 to 0.044	0.332515	0.456278	-0.0417376	-0.135 to 0.054
L-LDL-C	Cholesterol in large LDL	-0.00867356	-0.096 to 0.078	0.844973	0.921422	-0.00822158	-0.104 to 0.09
L-LDL-CE	Cholesteryl esters in large LDL	-0.00397862	-0.091 to 0.083	0.928681	0.958426	-0.0046581	-0.098 to 0.1
L-LDL-FC	Free cholesterol in large LDL	-0.0110769	-0.098 to 0.076	0.802191	0.909551	-0.0107563	-0.108 to 0.081
L-LDL-TG	Triglycerides in large LDL	0.193703	0.114 to 0.274	2.56113e-06	2.11573e-05	0.193306	0.108 to 0.282
M-LDL-P	Concentration of medium LDL particles	-0.00361778	-0.091 to 0.083	0.935102	0.958426	-0.00319903	-0.1 to 0.104
M-LDL-L	Total lipids in medium LDL	-0.0103384	-0.097 to 0.077	0.816033	0.909551	-0.011898	-0.108 to 0.077
M-LDL-PL	Phospholipids in medium LDL	-0.0539308	-0.141 to 0.033	0.223626	0.339142	-0.0507864	-0.149 to 0.047
M-LDL-C	Cholesterol in medium LDL	-0.00977879	-0.097 to 0.077	0.826142	0.909551	-0.00956647	-0.098 to 0.086
M-LDL-CE	Cholesteryl esters in medium LDL	0.00816883	-0.08 to 0.096	0.855417	0.923448	0.00553624	-0.082 to 0.108
M-LDL-FC	Free cholesterol in medium LDL	-0.0576769	-0.144 to 0.029	0.192917	0.304676	-0.0555557	-0.151 to 0.036
M-LDL-TG	Triglycerides in medium LDL	0.16063	0.078 to 0.243	0.000152866	0.000777918	0.159257	0.073 to 0.263
S-LDL-P	Concentration of small LDL particles	-0.0427209	-0.13 to 0.044	0.337109	0.456793	-0.041807	-0.136 to 0.062
S-LDL-L	Total lipids in small LDL	-0.0477827	-0.135 to 0.039	0.283015	0.410192	-0.0467041	-0.142 to 0.054
S-LDL-PL	Phospholipids in small LDL	-0.111407	-0.198 to -0.025	0.0118545	0.0366848	-0.110467	-0.198 to -0.015
S-LDL-C	Cholesterol in small LDL	-0.0317684	-0.119 to 0.055	0.475826	0.608716	-0.028546	-0.138 to 0.056
S-LDL-CE	Cholesteryl esters in small LDL	-0.0043375	-0.092 to 0.083	0.922706	0.958426	-0.00318745	-0.103 to 0.1
S-LDL-FC	Free cholesterol in small LDL	-0.108067	-0.195 to -0.021	0.0148439	0.0430286	-0.109479	-0.205 to -0.004
S-LDL-TG	Triglycerides in small LDL	0.0730418	-0.013 to 0.159	0.095232	0.17308	0.074416	-0.02 to 0.172
XL-HDL-P	Concentration of very large HDL particles	-0.131611	-0.214 to -0.049	0.00178735	0.007309	-0.132252	-0.224 to -0.044
XL-HDL-L	Total lipids in very large HDL	-0.137862	-0.22 to -0.056	0.00108024	0.00466743	-0.136206	-0.23 to -0.056
XL-HDL-PL	Phospholipids in very large HDL	-0.0846584	-0.166 to -0.004	0.0413167	0.09276	-0.0832328	-0.187 to 0.006
XL-HDL-C	Cholesterol in very large HDL	-0.173456	-0.257 to -0.09	4.95821e-05	0.000306873	-0.173931	-0.265 to -0.077
XL-HDL-CE	Cholesteryl esters in very large HDL	-0.171264	-0.255 to -0.088	6.41305e-05	0.000386471	-0.17417	-0.262 to -0.078
XL-HDL-FC	Free cholesterol in very large HDL	-0.16151	-0.244 to -0.079	0.000144819	0.000765914	-0.161118	-0.261 to -0.073
XL-HDL-TG	Triglycerides in very large HDL	-0.0255031	-0.111 to 0.06	0.558774	0.684425	-0.0272174	-0.118 to 0.066
L-HDL-P	Concentration of large HDL particles	-0.100577	-0.184 to -0.017	0.0180216	0.0474361	-0.10228	-0.187 to -0.007
L-HDL-L	Total lipids in large HDL	-0.102619	-0.186 to -0.02	0.0158062	0.0445884	-0.10254	-0.19 to -0.017
L-HDL-PL	Phospholipids in large HDL	-0.103075	-0.187 to -0.019	0.0165759	0.0446575	-0.102213	-0.19 to -0.013
L-HDL-C	Cholesterol in large HDL	-0.105719	-0.189 to -0.023	0.0127233	0.0383373	-0.107261	-0.2 to -0.015
L-HDL-CE	Cholesteryl esters in large HDL	-0.105539	-0.189 to -0.023	0.0129993	0.0386604	-0.10782	-0.196 to -0.021
L-HDL-FC	Free cholesterol in large HDL	-0.102327	-0.185 to -0.02	0.0157509	0.0445884	-0.102471	-0.202 to -0.015
L-HDL-TG	Triglycerides in large HDL	0.0462153	-0.036 to 0.128	0.269514	0.394191	0.0431994	-0.036 to 0.134
M-HDL-P	Concentration of medium HDL particles	-0.282126	-0.365 to -0.199	6.13354e-11	1.56064e-09	-0.282632	-0.361 to -0.2
M-HDL-L	Total lipids in medium HDL	-0.284104	-0.367 to -0.201	4.36405e-11	1.24921e-09	-0.282813	-0.367 to -0.206
M-HDL-PL	Phospholipids in medium HDL	-0.271276	-0.354 to -0.188	3.42152e-10	7.83528e-09	-0.271206	-0.345 to -0.189
M-HDL-C	Cholesterol in medium HDL	-0.294059	-0.376 to -0.212	7.82771e-12	3.58509e-10	-0.296604	-0.375 to -0.21
M-HDL-CE	Cholesteryl esters in medium HDL	-0.298763	-0.381 to -0.217	3.47133e-12	1.98734e-10	-0.300627	-0.39 to -0.216
M-HDL-FC	Free cholesterol in medium HDL	-0.266327	-0.349 to -0.183	7.10751e-10	1.47965e-08	-0.267073	-0.35 to -0.187
M-HDL-TG	Triglycerides in medium HDL	0.0105486	-0.076 to 0.097	0.811185	0.909551	0.0104582	-0.075 to 0.102
S-HDL-P	Concentration of small HDL particles	-0.208047	-0.293 to -0.123	1.95902e-06	1.72545e-05	-0.206114	-0.295 to -0.121
S-HDL-L	Total lipids in small HDL	-0.209021	-0.294 to -0.124	1.68692e-06	1.54522e-05	-0.209284	-0.306 to -0.123
S-HDL-PL	Phospholipids in small HDL	-0.293987	-0.377 to -0.211	1.38794e-11	5.2973e-10	-0.293205	-0.381 to -0.211
S-HDL-C	Cholesterol in small HDL	-0.0488282	-0.135 to 0.038	0.26812	0.394191	-0.0448201	-0.141 to 0.039
S-HDL-CE	Cholesteryl esters in small HDL	0.00726557	-0.08 to 0.094	0.870025	0.931008	0.00863871	-0.082 to 0.112
S-HDL-FC	Free cholesterol in small HDL	-0.286522	-0.369 to -0.204	2.93861e-11	9.61345e-10	-0.287479	-0.369 to -0.198
S-HDL-TG	Triglycerides in small HDL	0.133331	0.047 to 0.219	0.00246376	0.00956271	0.133351	0.041 to 0.224
XXL-VLDL-PL %	Phospholipids to total lipids ratio in chylomicrons and extremely large VLDL	-0.151117	-0.249 to -0.053	0.00266518	0.0101721	-0.154591	-0.247 to -0.052
XXL-VLDL-C %	Cholesterol to total lipids ratio in chylomicrons and extremely large VLDL	0.188138	0.092 to 0.284	0.00013926	0.000759299	0.189277	0.097 to 0.289
XXL-VLDL-CE %	Cholesteryl esters to total lipids ratio in chylomicrons and extremely large VLDL	0.190395	0.093 to 0.288	0.000147163	0.000765914	0.189946	0.1 to 0.295
XXL-VLDL-FC %	Free cholesterol to total lipids ratio in chylomicrons and extremely large VLDL	-0.00389458	-0.101 to 0.093	0.937499	0.958426	-0.00512742	-0.114 to 0.093
XXL-VLDL-TG %	Triglycerides to total lipids ratio in chylomicrons and extremely large VLDL	-0.142112	-0.239 to -0.045	0.00434039	0.015777	-0.139362	-0.265 to -0.041
XL-VLDL-PL %	Phospholipids to total lipids ratio in very large VLDL	-0.0591554	-0.161 to 0.042	0.254437	0.378351	-0.0609329	-0.169 to 0.037
XL-VLDL-C %	Cholesterol to total lipids ratio in very large VLDL	0.131501	0.036 to 0.227	0.00713098	0.0236666	0.130924	0.034 to 0.306
XL-VLDL-CE %	Cholesteryl esters to total lipids ratio in very large VLDL	0.185325	0.09 to 0.281	0.000159555	0.000794309	0.186728	0.084 to 0.303
XL-VLDL-FC %	Free cholesterol to total lipids ratio in very large VLDL	-0.0499241	-0.153 to 0.053	0.341845	0.460485	-0.0513463	-0.169 to 0.074
XL-VLDL-TG %	Triglycerides to total lipids ratio in very large VLDL	-0.055181	-0.156 to 0.046	0.285606	0.411345	-0.05411	-0.165 to 0.044
L-VLDL-PL %	Phospholipids to total lipids ratio in large VLDL	0.150947	0.061 to 0.241	0.00110434	0.00468321	0.149595	0.056 to 0.262
L-VLDL-C %	Cholesterol to total lipids ratio in large VLDL	0.0868293	0.002 to 0.171	0.0450015	0.0990899	0.0883711	-0.007 to 0.167
L-VLDL-CE %	Cholesteryl esters to total lipids ratio in large VLDL	0.13446	0.048 to 0.221	0.00242923	0.00956271	0.137424	0.039 to 0.222
L-VLDL-FC %	Free cholesterol to total lipids ratio in large VLDL	-0.0453568	-0.136 to 0.045	0.327045	0.456278	-0.0464956	-0.148 to 0.055
L-VLDL-TG %	Triglycerides to total lipids ratio in large VLDL	-0.125652	-0.214 to -0.038	0.00536967	0.0189583	-0.12655	-0.215 to -0.029
M-VLDL-PL %	Phospholipids to total lipids ratio in medium VLDL	0.105564	0.021 to 0.19	0.0146353	0.0429676	0.108396	0.018 to 0.179
M-VLDL-C %	Cholesterol to total lipids ratio in medium VLDL	0.0800628	-0.005 to 0.166	0.0669786	0.133375	0.0796636	-0.015 to 0.184
M-VLDL-CE %	Cholesteryl esters to total lipids ratio in medium VLDL	0.0857862	0 to 0.171	0.0500825	0.108197	0.0856619	0.001 to 0.18
M-VLDL-FC %	Free cholesterol to total lipids ratio in medium VLDL	0.0158818	-0.071 to 0.103	0.721737	0.856362	0.0144935	-0.076 to 0.144
M-VLDL-TG %	Triglycerides to total lipids ratio in medium VLDL	-0.10359	-0.188 to -0.019	0.0163556	0.0445884	-0.10541	-0.205 to -0.005
S-VLDL-PL %	Phospholipids to total lipids ratio in small VLDL	-0.0456139	-0.131 to 0.04	0.295762	0.423309	-0.044118	-0.134 to 0.042
S-VLDL-C %	Cholesterol to total lipids ratio in small VLDL	0.0136362	-0.073 to 0.101	0.758863	0.870495	0.0139651	-0.086 to 0.105
S-VLDL-CE %	Cholesteryl esters to total lipids ratio in small VLDL	0.00199832	-0.086 to 0.09	0.964605	0.970204	0.0022352	-0.103 to 0.095
S-VLDL-FC %	Free cholesterol to total lipids ratio in small VLDL	-0.00738252	-0.089 to 0.074	0.858928	0.923448	-0.00442629	-0.117 to 0.067
S-VLDL-TG %	Triglycerides to total lipids ratio in small VLDL	-0.00416367	-0.089 to 0.081	0.923419	0.958426	-0.00560042	-0.085 to 0.083
XS-VLDL-PL %	Phospholipids to total lipids ratio in very small VLDL	0.0813529	-0.006 to 0.169	0.0682849	0.134804	0.0803093	-0.013 to 0.174
XS-VLDL-C %	Cholesterol to total lipids ratio in very small VLDL	-0.124179	-0.211 to -0.037	0.00538119	0.0189583	-0.122392	-0.215 to -0.043
XS-VLDL-CE %	Cholesteryl esters to total lipids ratio in very small VLDL	-0.122131	-0.209 to -0.035	0.0060305	0.020924	-0.122759	-0.203 to -0.027
XS-VLDL-FC %	Free cholesterol to total lipids ratio in very small VLDL	-0.0306459	-0.118 to 0.056	0.490825	0.614201	-0.0316075	-0.127 to 0.056
XS-VLDL-TG %	Triglycerides to total lipids ratio in very small VLDL	0.0755461	-0.011 to 0.162	0.0890085	0.164379	0.0737732	-0.007 to 0.162
IDL-PL %	Phospholipids to total lipids ratio in IDL	-0.0407682	-0.125 to 0.044	0.344776	0.461718	-0.0383634	-0.147 to 0.04
IDL-C %	Cholesterol to total lipids ratio in IDL	-0.156159	-0.242 to -0.07	0.000421849	0.00193207	-0.15749	-0.241 to -0.05
IDL-CE %	Cholesteryl esters to total lipids ratio in IDL	-0.202817	-0.288 to -0.118	3.85102e-06	3.00824e-05	-0.200606	-0.287 to -0.107
IDL-FC %	Free cholesterol to total lipids ratio in IDL	0.031786	-0.056 to 0.12	0.478467	0.608716	0.0320832	-0.046 to 0.142
IDL-TG %	Triglycerides to total lipids ratio in IDL	0.21654	0.132 to 0.301	6.26491e-07	6.23767e-06	0.216621	0.122 to 0.31
L-LDL-PL %	Phospholipids to total lipids ratio in large LDL	-0.100919	-0.188 to -0.014	0.0228605	0.0569028	-0.100889	-0.21 to -0.012
L-LDL-C %	Cholesterol to total lipids ratio in large LDL	-0.0217568	-0.11 to 0.066	0.627177	0.751955	-0.0201179	-0.111 to 0.099
L-LDL-CE %	Cholesteryl esters to total lipids ratio in large LDL	-0.00638914	-0.094 to 0.082	0.886829	0.940845	-0.00757482	-0.091 to 0.116
L-LDL-FC %	Free cholesterol to total lipids ratio in large LDL	-0.0246579	-0.112 to 0.062	0.578512	0.704676	-0.0249644	-0.115 to 0.073
L-LDL-TG %	Triglycerides to total lipids ratio in large LDL	0.186763	0.103 to 0.27	1.38216e-05	9.04326e-05	0.18767	0.092 to 0.274
M-LDL-PL %	Phospholipids to total lipids ratio in medium LDL	-0.0737888	-0.161 to 0.014	0.0984225	0.17747	-0.0742234	-0.159 to 0.028
M-LDL-C %	Cholesterol to total lipids ratio in medium LDL	-0.015631	-0.103 to 0.072	0.726047	0.857035	-0.0174901	-0.103 to 0.085
M-LDL-CE %	Cholesteryl esters to total lipids ratio in medium LDL	0.00169433	-0.087 to 0.091	0.970204	0.970204	0.000742299	-0.107 to 0.087
M-LDL-FC %	Free cholesterol to total lipids ratio in medium LDL	-0.0909497	-0.178 to -0.004	0.0412567	0.09276	-0.0910704	-0.185 to 0.013
M-LDL-TG %	Triglycerides to total lipids ratio in medium LDL	0.196324	0.113 to 0.279	4.38452e-06	3.13767e-05	0.196835	0.107 to 0.287
S-LDL-PL %	Phospholipids to total lipids ratio in small LDL	-0.0798227	-0.167 to 0.007	0.0723421	0.140393	-0.0794017	-0.176 to 0.01
S-LDL-C %	Cholesterol to total lipids ratio in small LDL	0.0136002	-0.074 to 0.101	0.760258	0.870495	0.0154017	-0.092 to 0.106
S-LDL-CE %	Cholesteryl esters to total lipids ratio in small LDL	0.0335847	-0.054 to 0.122	0.45456	0.588104	0.0357367	-0.062 to 0.121
S-LDL-FC %	Free cholesterol to total lipids ratio in small LDL	-0.128135	-0.215 to -0.041	0.00395352	0.0146025	-0.128671	-0.22 to -0.039
S-LDL-TG %	Triglycerides to total lipids ratio in small LDL	0.147597	0.062 to 0.233	0.000742055	0.0032679	0.146776	0.061 to 0.232
XL-HDL-PL %	Phospholipids to total lipids ratio in very large HDL	0.157969	0.074 to 0.242	0.000247626	0.00120652	0.159369	0.075 to 0.249
XL-HDL-C %	Cholesterol to total lipids ratio in very large HDL	-0.211449	-0.296 to -0.127	1.1408e-06	1.08852e-05	-0.211951	-0.306 to -0.124
XL-HDL-CE %	Cholesteryl esters to total lipids ratio in very large HDL	-0.170871	-0.255 to -0.087	8.05013e-05	0.000470138	-0.171831	-0.258 to -0.081
XL-HDL-FC %	Free cholesterol to total lipids ratio in very large HDL	-0.229896	-0.316 to -0.144	2.47265e-07	2.69637e-06	-0.228207	-0.326 to -0.133
XL-HDL-TG %	Triglycerides to total lipids ratio in very large HDL	0.0779063	-0.008 to 0.164	0.0771647	0.148493	0.0770671	-0.015 to 0.167
L-HDL-PL %	Phospholipids to total lipids ratio in large HDL	0.00228561	-0.081 to 0.085	0.956991	0.970204	0.000740722	-0.082 to 0.093
L-HDL-C %	Cholesterol to total lipids ratio in large HDL	-0.103732	-0.188 to -0.019	0.01627	0.0445884	-0.102222	-0.201 to -0.02
L-HDL-CE %	Cholesteryl esters to total lipids ratio in large HDL	-0.0870396	-0.173 to -0.001	0.0473704	0.103313	-0.0880279	-0.179 to 0.001
L-HDL-FC %	Free cholesterol to total lipids ratio in large HDL	-0.0999835	-0.183 to -0.017	0.0190187	0.0494918	-0.0977458	-0.197 to -0.006
L-HDL-TG %	Triglycerides to total lipids ratio in large HDL	0.146255	0.064 to 0.229	0.000574631	0.00258021	0.146599	0.051 to 0.227
M-HDL-PL %	Phospholipids to total lipids ratio in medium HDL	0.234438	0.151 to 0.318	6.74183e-08	8.75984e-07	0.234113	0.139 to 0.325
M-HDL-C %	Cholesterol to total lipids ratio in medium HDL	-0.242467	-0.326 to -0.159	2.25936e-08	3.4493e-07	-0.241524	-0.344 to -0.159
M-HDL-CE %	Cholesteryl esters to total lipids ratio in medium HDL	-0.22593	-0.31 to -0.142	1.9923e-07	2.28118e-06	-0.225423	-0.331 to -0.147
M-HDL-FC %	Free cholesterol to total lipids ratio in medium HDL	-0.205064	-0.29 to -0.121	2.58691e-06	2.11573e-05	-0.203937	-0.282 to -0.124
M-HDL-TG %	Triglycerides to total lipids ratio in medium HDL	0.20019	0.116 to 0.284	3.94092e-06	3.00824e-05	0.199196	0.117 to 0.296
S-HDL-PL %	Phospholipids to total lipids ratio in small HDL	-0.169105	-0.255 to -0.083	0.000124902	0.000697626	-0.169099	-0.257 to -0.076
S-HDL-C %	Cholesterol to total lipids ratio in small HDL	0.0981822	0.011 to 0.185	0.0269765	0.0636867	0.0986834	0.021 to 0.202
S-HDL-CE %	Cholesteryl esters to total lipids ratio in small HDL	0.113148	0.026 to 0.2	0.0111081	0.0352575	0.114525	0.032 to 0.232
S-HDL-FC %	Free cholesterol to total lipids ratio in small HDL	-0.201689	-0.287 to -0.116	4.62868e-06	3.21202e-05	-0.204013	-0.293 to -0.107
S-HDL-TG %	Triglycerides to total lipids ratio in small HDL	0.220305	0.136 to 0.304	3.70004e-07	3.8514e-06	0.217928	0.132 to 0.319
VLDL particle size	Average diameter for VLDL particles	-0.0970654	-0.181 to -0.013	0.0232918	0.0573529	-0.0971449	-0.18 to -0.012
LDL particle size	Average diameter for LDL particles	0.228937	0.147 to 0.311	6.88546e-08	8.75984e-07	0.227023	0.146 to 0.326
HDL particle size	Average diameter for HDL particles	-0.125722	-0.209 to -0.043	0.00305064	0.0114524	-0.124506	-0.218 to -0.032
Total-C	Total cholesterol	-0.100644	-0.186 to -0.015	0.0219093	0.0551343	-0.100262	-0.188 to 0.003
VLDL-C	VLDL cholesterol	0.006274	-0.081 to 0.093	0.887435	0.940845	0.0073286	-0.077 to 0.1
Remnant-C	Remnant cholesterol (non-HDL, non-LDL -cholesterol)	-0.0139394	-0.1 to 0.073	0.752404	0.870205	-0.0127777	-0.103 to 0.077
LDL-C	LDL cholesterol	-0.0143613	-0.101 to 0.073	0.746581	0.870205	-0.012799	-0.107 to 0.086
HDL-C	HDL cholesterol	-0.24363	-0.324 to -0.163	5.2924e-09	9.32277e-08	-0.241582	-0.33 to -0.151
HDL2-C	HDL2 cholesterol	-0.241687	-0.323 to -0.161	9.30952e-09	1.52277e-07	-0.241286	-0.338 to -0.159
HDL3-C	HDL3 cholesterol	-0.179264	-0.258 to -0.101	9.96858e-06	6.71413e-05	-0.181517	-0.256 to -0.098
Esterified-C	Total esterified cholesterol	-0.119077	-0.205 to -0.033	0.00694273	0.0233807	-0.120839	-0.206 to -0.016
Free-C	Total free cholesterol	-0.0487658	-0.135 to 0.038	0.270253	0.394191	-0.0448802	-0.149 to 0.053
Total triglycerides	Total triglycerides	0.00983949	-0.077 to 0.096	0.823927	0.909551	0.0122879	-0.073 to 0.095
VLDL-TG	Triglycerides in VLDL	-0.030469	-0.117 to 0.056	0.488754	0.614201	-0.030329	-0.116 to 0.061
LDL-TG	Triglycerides in LDL	0.164511	0.083 to 0.246	8.21202e-05	0.000470138	0.165529	0.073 to 0.255
HDL-TG	Triglycerides in HDL	0.0548004	-0.03 to 0.14	0.207114	0.319177	0.0540812	-0.028 to 0.143
Phosphoglycerides	Phosphoglycerides	-0.108445	-0.193 to -0.024	0.0121012	0.0369489	-0.108488	-0.193 to -0.02
TG/PG	Ratio of triglycerides to phosphoglycerides	0.0450142	-0.041 to 0.131	0.305078	0.430899	0.0443023	-0.042 to 0.125
Phosphatidylcholines	Phosphatidylcholines	-0.063513	-0.151 to 0.024	0.153901	0.257251	-0.0613031	-0.154 to 0.029
Sphingomyelins	Sphingomyelins	-0.0788409	-0.16 to 0.002	0.0569763	0.117546	-0.078608	-0.166 to -0.001
Total cholines	Total cholines	-0.0319726	-0.118 to 0.054	0.465119	0.598383	-0.0312598	-0.119 to 0.056
ApoA1	Apolipoprotein A1	-0.257051	-0.339 to -0.175	1.76596e-09	3.37003e-08	-0.258315	-0.342 to -0.172
ApoB	Apolipoprotein B	-0.0281334	-0.115 to 0.058	0.524656	0.649439	-0.0285266	-0.124 to 0.063
ApoB/ApoA1	Ratio of apolipoprotein B to apolipoprotein A1	0.118792	0.034 to 0.204	0.0064875	0.0221737	0.11902	0.026 to 0.216
Total fatty acids	Total fatty acids	-0.056731	-0.143 to 0.029	0.195622	0.306832	-0.0565411	-0.144 to 0.029
Unsaturation	Degree of unsaturation	-0.0347951	-0.118 to 0.048	0.412812	0.540194	-0.0362719	-0.113 to 0.062
DHA	Docosahexaenoic acid	-0.107279	-0.189 to -0.025	0.0105026	0.0338747	-0.107089	-0.177 to -0.03
LA	Linoleic acid	-0.0724427	-0.159 to 0.014	0.101267	0.181173	-0.0698554	-0.163 to 0.018
Omega-3	Omega-3 fatty acids	-0.186096	-0.271 to -0.102	1.91189e-05	0.000121617	-0.184135	-0.274 to -0.108
Omega-6	Omega-6 fatty acids	-0.0759251	-0.161 to 0.009	0.0816523	0.15582	-0.074984	-0.168 to 0.011
PUFA	Polyunsaturated fatty acids	-0.0965527	-0.182 to -0.011	0.0267742	0.0636867	-0.0928404	-0.188 to -0.01
MUFA	Monounsaturated fatty acids	0.0143526	-0.073 to 0.102	0.748796	0.870205	0.0149811	-0.068 to 0.104
SFA	Saturated fatty acids	-0.0729734	-0.156 to 0.01	0.0861928	0.160776	-0.0715106	-0.153 to 0.012
DHA %	Ratio of docosahexaenoic acid to total fatty acids	-0.0994272	-0.183 to -0.016	0.0196445	0.0505459	-0.0991632	-0.174 to -0.026
LA %	Ratio of linoleic acid to total fatty acids	-0.0409724	-0.129 to 0.047	0.363775	0.481529	-0.0389855	-0.139 to 0.063
Omega-3 %	Ratio of omega-3 fatty acids to total fatty acids	-0.200994	-0.286 to -0.116	4.27913e-06	3.13767e-05	-0.201217	-0.284 to -0.108
Omega-6 %	Ratio of omega-6 fatty acids to total fatty acids	-0.0365692	-0.124 to 0.051	0.412426	0.540194	-0.0309794	-0.139 to 0.049
PUFA %	Ratio of polyunsaturated fatty acids to total fatty acids	-0.0844807	-0.172 to 0.003	0.0579926	0.118574	-0.083701	-0.179 to 0.013
MUFA %	Ratio of monounsaturated fatty acids to total fatty acids	0.132523	0.049 to 0.216	0.00196179	0.0078816	0.133588	0.044 to 0.22
SFA %	Ratio of saturated fatty acids to total fatty acids	-0.0542887	-0.138 to 0.03	0.205158	0.319177	-0.054419	-0.134 to 0.025
Glucose	Glucose	-0.0264928	-0.083 to 0.03	0.354992	0.472635	-0.0269937	-0.082 to 0.044
Lactate	Lactate	-0.0322688	-0.069 to 0.004	0.0839957	0.158967	-0.0318909	-0.074 to 0.004
Pyruvate	Pyruvate	-0.0322821	-0.08 to 0.016	0.186145	0.300192	-0.0303956	-0.089 to 0.017
Citrate	Citrate	-0.105848	-0.192 to -0.02	0.0161407	0.0445884	-0.107212	-0.193 to -0.016
Glycerol	Glycerol	-0.00809909	-0.096 to 0.079	0.856017	0.923448	-0.0109485	-0.118 to 0.09
Alanine	Alanine	-0.238276	-0.3 to -0.177	1.43224e-13	1.09328e-11	-0.23939	-0.299 to -0.172
Glutamine	Glutamine	-0.150008	-0.231 to -0.069	0.000308301	0.00147085	-0.150077	-0.243 to -0.052
Glycine	Glycine	-0.0889671	-0.162 to -0.016	0.0173985	0.0463285	-0.0876527	-0.162 to -0.018
Histidine	Histidine	-0.195523	-0.267 to -0.124	1.45451e-07	1.75307e-06	-0.196224	-0.271 to -0.118
Isoleucine	Isoleucine	-0.0598502	-0.143 to 0.023	0.15715	0.259307	-0.0587246	-0.136 to 0.03
Leucine	Leucine	-0.0791979	-0.159 to 0.001	0.0535914	0.114696	-0.0797025	-0.157 to 0.006
Valine	Valine	-0.0499543	-0.129 to 0.029	0.215076	0.32835	-0.0516733	-0.118 to 0.029
Phenylalanine	Phenylalanine	0.141412	0.064 to 0.218	0.000344479	0.00160991	0.13908	0.066 to 0.219
Tyrosine	Tyrosine	-0.106195	-0.188 to -0.024	0.0112393	0.0352575	-0.106884	-0.182 to -0.029
Acetate	Acetate	-0.0845678	-0.159 to -0.011	0.0255222	0.0615219	-0.0864167	-0.162 to -0.01
Acetoacetate	Acetoacetate	0.0104424	-0.075 to 0.095	0.809759	0.909551	0.0112141	-0.075 to 0.089
3-hydroxybutyrate	Beta-hydroxybutyrate	0.0536447	-0.026 to 0.134	0.18965	0.302216	0.053361	-0.018 to 0.124
Creatinine	Creatinine	0.0417072	-0.043 to 0.126	0.334911	0.456515	0.0423995	-0.05 to 0.125
Albumin	Albumin	-0.108674	-0.189 to -0.029	0.00811001	0.0265313	-0.110253	-0.183 to -0.023
Glycoprotein acetyls	Glycoprotein acetyls	0.502114	0.433 to 0.571	7.56594e-39	8.66301e-37	0.503938	0.418 to 0.575
hsCRP	High sensitivity C-Reactive Protein	-	-	-	-	-	-
Regression coefficients (β) are estimated difference in log metabolomic measure at 12 months of age (SD units) per 1 SD increase in 12-month log hsCRP.
Models are adjusted for infant sex, birth weight z-score, gestational age, exact age at 12-month time point, maternal household income, exposure to any breastfeeding, exposure to any maternal smoking during pregnancy, and 12-month blood sample processing time.
Adjusted p-values are based on the Benjamini-Hochberg method of adjustment for multiple comparisons.
Bootstrap estimates are calculated as the mean coefficent across 1000 iterations of bootstrap resampling.
Bootstrap 95% confidence intervals are bias-corrected accelerated percentile confidence intervals.
