# Supplementary material for: Early life infection and proinflammatory, atherogenic metabolomic and lipidomic profiles in infancy: a population-based cohort study
Source: eLife. 2022 May 10;11:e75170. doi: 10.7554/eLife.75170 (PMC9090335; doi:10.7554/eLife.75170)
Supplement: Figure 4—source data 2. [file elife-75170-fig4-data2.xlsx]

## Sheet: Figure 4 - Source Data 2
Figure 4 - Source Data 2. Summary of regression models for difference in 6-month NMR metabolomic measures per SD increase in 6-month log hsCRP.
		6-month hsCRP
Measure	Description	Estimate (β)	95% Confidence Interval	P-value	Adj. P-value	Bootstrap Estimate	Bootstrap 95% Confidence Interval
Total-C	Total cholesterol	-0.246349	-0.334 to -0.158	6.85567e-08	5.21446e-07	-0.24777	-0.348 to -0.14
non-HDL-C	Total cholesterol minus HDL-C	-0.217279	-0.306 to -0.129	2.0165e-06	1.01228e-05	-0.21693	-0.35 to -0.124
Remnant-C	Remnant cholesterol (non-HDL, non-LDL -cholesterol)	-0.162868	-0.252 to -0.074	0.000357269	0.000996384	-0.163704	-0.264 to -0.07
VLDL-C	VLDL cholesterol	-0.0883534	-0.177 to 0.001	0.0520648	0.090126	-0.0888468	-0.179 to 0.005
Clinical LDL-C	Clinical LDL cholesterol	-0.251825	-0.34 to -0.163	3.95698e-08	3.10376e-07	-0.251344	-0.482 to -0.165
LDL-C	LDL cholesterol	-0.252828	-0.341 to -0.164	3.76571e-08	3.04901e-07	-0.253874	-0.441 to -0.158
HDL-C	HDL cholesterol	-0.186447	-0.276 to -0.097	5.03556e-05	0.000170801	-0.187901	-0.297 to -0.09
Total triglycerides	Total triglycerides	-0.00712453	-0.092 to 0.078	0.86949	0.901826	-0.00792241	-0.093 to 0.077
VLDL-TG	Triglycerides in VLDL	-0.0158961	-0.099 to 0.067	0.708755	0.776845	-0.0152538	-0.099 to 0.061
LDL-TG	Triglycerides in LDL	0.0557471	-0.033 to 0.145	0.218918	0.298633	0.0526358	-0.043 to 0.149
HDL-TG	Triglycerides in HDL	-0.0231857	-0.113 to 0.067	0.614102	0.692401	-0.0262678	-0.106 to 0.074
Total-PL	Total phospholipids in lipoprotein particles	-0.213724	-0.303 to -0.125	3.45291e-06	1.5734e-05	-0.213767	-0.318 to -0.112
VLDL-PL	Phospholipids in VLDL	-0.0464501	-0.134 to 0.041	0.299413	0.384864	-0.0452396	-0.141 to 0.04
LDL-PL	Phospholipids in LDL	-0.215667	-0.304 to -0.127	2.43052e-06	1.15106e-05	-0.217776	-0.329 to -0.126
HDL-PL	Phospholipids in HDL	-0.175113	-0.266 to -0.084	0.000172211	0.000514583	-0.175093	-0.271 to -0.064
Total-CE	Total esterified cholesterol	-0.256919	-0.345 to -0.169	1.82294e-08	1.78982e-07	-0.260558	-0.366 to -0.155
VLDL-CE	Cholesteryl esters in VLDL	-0.0948984	-0.184 to -0.006	0.0373239	0.0659739	-0.0930922	-0.199 to -0.007
LDL-CE	Cholesteryl esters in LDL	-0.24752	-0.336 to -0.159	8.01121e-08	5.91416e-07	-0.246378	-0.544 to -0.154
HDL-CE	Cholesteryl esters in HDL	-0.196025	-0.285 to -0.107	1.93729e-05	7.15087e-05	-0.198003	-0.302 to -0.089
Total-FC	Total free cholesterol	-0.214183	-0.303 to -0.126	2.72457e-06	1.26642e-05	-0.214836	-0.329 to -0.122
VLDL-FC	Free cholesterol in VLDL	-0.0764568	-0.164 to 0.012	0.0892288	0.147345	-0.0762843	-0.172 to 0.012
LDL-FC	Free cholesterol in LDL	-0.259943	-0.348 to -0.172	1.17552e-08	1.2294e-07	-0.260955	-0.401 to -0.163
HDL-FC	Free cholesterol in HDL	-0.144651	-0.235 to -0.054	0.00177039	0.00400331	-0.142395	-0.262 to -0.044
Total-L	Total lipids in lipoprotein particles	-0.206216	-0.295 to -0.117	6.66281e-06	2.57287e-05	-0.207442	-0.311 to -0.11
VLDL-L	Total lipids in VLDL	-0.0438709	-0.13 to 0.042	0.319369	0.404857	-0.0448099	-0.133 to 0.037
LDL-L	Total lipids in LDL	-0.230304	-0.319 to -0.142	5.01977e-07	2.86355e-06	-0.230215	-0.382 to -0.139
HDL-L	Total lipids in HDL	-0.179709	-0.27 to -0.089	0.000109058	0.000337946	-0.178547	-0.285 to -0.077
Total-P	Total concentration of lipoprotein particles	-0.288926	-0.377 to -0.201	3.21877e-10	4.75242e-09	-0.288144	-0.394 to -0.195
VLDL-P	Concentration of VLDL particles	-0.0466376	-0.135 to 0.041	0.299964	0.384864	-0.0498608	-0.14 to 0.037
LDL-P	Concentration of LDL particles	-0.158686	-0.247 to -0.07	0.00049465	0.0012933	-0.160048	-0.253 to -0.07
HDL-P	Concentration of HDL particles	-0.282233	-0.371 to -0.194	8.42974e-10	1.17548e-08	-0.283334	-0.388 to -0.175
VLDL particle size	Average diameter for VLDL particles	-0.0683434	-0.15 to 0.014	0.103604	0.167772	-0.068474	-0.159 to 0.018
LDL particle size	Average diameter for LDL particles	-0.00402913	-0.094 to 0.086	0.930076	0.945138	-0.0032996	-0.101 to 0.084
HDL particle size	Average diameter for HDL particles	0.0370373	-0.053 to 0.127	0.421077	0.508127	0.0363436	-0.055 to 0.128
Phosphoglycerides	Phosphoglycerides	-0.209916	-0.299 to -0.12	5.62253e-06	2.31353e-05	-0.20672	-0.323 to -0.113
TG/PG	Ratio of triglycerides to phosphoglycerides	0.10446	0.021 to 0.188	0.0147108	0.0279729	0.104171	0.029 to 0.197
Total cholines	Total cholines	-0.219012	-0.308 to -0.13	2.15853e-06	1.04191e-05	-0.217853	-0.339 to -0.121
Phosphatidylcholines	Phosphatidylcholines	-0.243867	-0.333 to -0.155	1.16628e-07	8.36388e-07	-0.243036	-0.364 to -0.154
Sphingomyelins	Sphingomyelins	-0.107529	-0.196 to -0.019	0.0181345	0.0337168	-0.108229	-0.204 to -0.006
ApoB	Apolipoprotein B	-0.146692	-0.236 to -0.058	0.00129714	0.00301465	-0.14725	-0.248 to -0.058
ApoA1	Apolipoprotein A1	-0.225626	-0.315 to -0.136	1.07244e-06	5.85181e-06	-0.22646	-0.332 to -0.134
ApoB/ApoA1	Ratio of apolipoprotein B to apolipoprotein A1	0.00448401	-0.086 to 0.095	0.92228	0.941025	0.00297432	-0.08 to 0.103
Total fatty acids	Total fatty acids	-0.0719675	-0.162 to 0.018	0.117251	0.185094	-0.0730078	-0.171 to 0.023
Unsaturation	Degree of unsaturation	-0.103225	-0.192 to -0.014	0.0237997	0.0436039	-0.105809	-0.188 to -0.007
Omega-3	Omega-3 fatty acids	-0.0198125	-0.109 to 0.069	0.66177	0.734974	-0.0172479	-0.115 to 0.073
Omega-6	Omega-6 fatty acids	-0.15046	-0.24 to -0.061	0.00105633	0.00254941	-0.151664	-0.245 to -0.052
PUFA	Polyunsaturated fatty acids	-0.138046	-0.228 to -0.048	0.00266672	0.00597632	-0.140107	-0.235 to -0.045
MUFA	Monounsaturated fatty acids	0.00196107	-0.088 to 0.092	0.965865	0.969728	0.00332615	-0.09 to 0.093
SFA	Saturated fatty acids	-0.0705428	-0.16 to 0.019	0.124739	0.194469	-0.0685819	-0.158 to 0.025
LA	Linoleic acid	-0.131705	-0.221 to -0.042	0.00408415	0.00861446	-0.129046	-0.256 to -0.046
DHA	Docosahexaenoic acid	-0.0683668	-0.157 to 0.02	0.132202	0.203574	-0.071245	-0.156 to 0.022
Omega-3 %	Ratio of omega-3 fatty acids to total fatty acids	0.0144839	-0.074 to 0.103	0.748702	0.810018	0.0125511	-0.079 to 0.101
Omega-6 %	Ratio of omega-6 fatty acids to total fatty acids	-0.100163	-0.189 to -0.011	0.028204	0.0509295	-0.101711	-0.185 to -0.01
PUFA %	Ratio of polyunsaturated fatty acids to total fatty acids	-0.0939172	-0.184 to -0.004	0.0409815	0.0719325	-0.0959336	-0.176 to -0.004
MUFA %	Ratio of monounsaturated fatty acids to total fatty acids	0.128912	0.04 to 0.218	0.00467674	0.00978218	0.130685	0.029 to 0.22
SFA %	Ratio of saturated fatty acids to total fatty acids	-0.0236033	-0.113 to 0.066	0.605631	0.687844	-0.0219711	-0.108 to 0.067
LA %	Ratio of linoleic acid to total fatty acids	-0.102559	-0.191 to -0.014	0.023271	0.0429486	-0.10478	-0.192 to -0.018
DHA %	Ratio of docosahexaenoic acid to total fatty acids	-0.0247476	-0.114 to 0.065	0.587378	0.670145	-0.025816	-0.115 to 0.062
PUFA/MUFA	Ratio of polyunsaturated fatty acids to monounsaturated fatty acids	-0.122529	-0.212 to -0.033	0.00748852	0.0150369	-0.123025	-0.212 to -0.025
Omega-6/Omega-3	Ratio of omega-6 fatty acids to omega-3 fatty acids	-0.0314267	-0.12 to 0.057	0.48791	0.565338	-0.0322474	-0.12 to 0.055
Alanine	Alanine	-0.261994	-0.333 to -0.191	1.69359e-12	4.25091e-11	-0.260465	-0.333 to -0.196
Glutamine	Glutamine	-0.22021	-0.302 to -0.138	2.34595e-07	1.47208e-06	-0.221116	-0.307 to -0.139
Glycine	Glycine	-0.133678	-0.206 to -0.061	0.000345526	0.000974461	-0.133247	-0.207 to -0.056
Histidine	Histidine	-0.135031	-0.216 to -0.054	0.00118754	0.00281201	-0.133985	-0.222 to -0.048
Total BCAA	Total concentration of branched-chain amino acids (leucine + isoleucine + valine)	-0.14447	-0.229 to -0.06	0.000918851	0.00223914	-0.14295	-0.243 to -0.051
Isoleucine	Isoleucine	-0.193629	-0.28 to -0.107	1.37522e-05	5.15195e-05	-0.194334	-0.289 to -0.096
Leucine	Leucine	-0.150277	-0.234 to -0.067	0.000451677	0.00121904	-0.147839	-0.246 to -0.058
Valine	Valine	-0.116002	-0.202 to -0.03	0.00813902	0.0162134	-0.115895	-0.212 to -0.012
Phenylalanine	Phenylalanine	0.0199827	-0.061 to 0.101	0.629282	0.702573	0.0193639	-0.068 to 0.113
Tyrosine	Tyrosine	-0.0932421	-0.18 to -0.006	0.0356754	0.0635073	-0.0925282	-0.185 to -0.003
Glucose	Glucose	-0.0782425	-0.126 to -0.031	0.00136685	0.00314751	-0.0786731	-0.143 to -0.027
Lactate	Lactate	0.0230167	-0.009 to 0.055	0.164499	0.241458	0.0230639	-0.011 to 0.053
Pyruvate	Pyruvate	0.0480775	-0.001 to 0.097	0.057129	0.0982148	0.048136	-0.021 to 0.098
Citrate	Citrate	-0.0597034	-0.152 to 0.033	0.205389	0.286404	-0.0608177	-0.133 to 0.032
Glycerol	Glycerol	0.0430575	-0.063 to 0.149	0.424668	0.510008	0.0466546	-0.076 to 0.148
3-Hydroxybutyrate	3-Hydroxybutyrate	-0.0027959	-0.092 to 0.086	0.951026	0.959186	-0.00402289	-0.095 to 0.087
Acetate	Acetate	-0.0451739	-0.111 to 0.02	0.177464	0.257477	-0.0468655	-0.111 to 0.03
Acetoacetate	Acetoacetate	-0.0066342	-0.08 to 0.067	0.86007	0.89949	-0.00531889	-0.085 to 0.067
Acetone	Acetone	-0.0799038	-0.169 to 0.009	0.078016	0.130547	-0.0850934	-0.166 to 0.01
Creatinine	Creatinine	0.0792982	-0.012 to 0.17	0.0887055	0.147345	0.0792654	-0.016 to 0.181
Albumin	Albumin	-0.300286	-0.387 to -0.213	3.74812e-11	6.71984e-10	-0.300614	-0.395 to -0.216
Glycoprotein acetyls	Glycoprotein acetyls	0.551522	0.475 to 0.628	2.03641e-38	2.5557e-36	0.549753	0.471 to 0.627
XXL-VLDL-P	Concentration of chylomicrons and extremely large VLDL particles	0.0438242	-0.045 to 0.133	0.333325	0.418322	0.0454655	-0.041 to 0.134
XXL-VLDL-L	Total lipids in chylomicrons and extremely large VLDL	0.0338155	-0.055 to 0.123	0.455388	0.544297	0.0366537	-0.064 to 0.121
XXL-VLDL-PL	Phospholipids in chylomicrons and extremely large VLDL	0.0536857	-0.037 to 0.144	0.246009	0.330204	0.0533725	-0.034 to 0.144
XXL-VLDL-C	Cholesterol in chylomicrons and extremely large VLDL	0.0297367	-0.06 to 0.12	0.518062	0.595722	0.0318124	-0.075 to 0.117
XXL-VLDL-CE	Cholesteryl esters in chylomicrons and extremely large VLDL	0.0326636	-0.058 to 0.123	0.478629	0.561383	0.033929	-0.063 to 0.124
XXL-VLDL-FC	Free cholesterol in chylomicrons and extremely large VLDL	0.0294829	-0.06 to 0.119	0.519773	0.595722	0.030519	-0.054 to 0.117
XXL-VLDL-TG	Triglycerides in chylomicrons and extremely large VLDL	0.0404949	-0.049 to 0.13	0.376655	0.468022	0.042054	-0.05 to 0.12
XL-VLDL-P	Concentration of very large VLDL particles	-0.0316967	-0.117 to 0.053	0.465948	0.551665	-0.0279597	-0.153 to 0.054
XL-VLDL-L	Total lipids in very large VLDL	-0.0219818	-0.108 to 0.064	0.615161	0.692401	-0.0236169	-0.124 to 0.075
XL-VLDL-PL	Phospholipids in very large VLDL	-0.0147172	-0.103 to 0.074	0.744139	0.808567	-0.017081	-0.13 to 0.086
XL-VLDL-C	Cholesterol in very large VLDL	-0.048048	-0.136 to 0.04	0.287394	0.373762	-0.0470833	-0.158 to 0.038
XL-VLDL-CE	Cholesteryl esters in very large VLDL	-0.0732214	-0.163 to 0.016	0.110091	0.176258	-0.0736648	-0.19 to 0.026
XL-VLDL-FC	Free cholesterol in very large VLDL	-0.0126612	-0.1 to 0.074	0.775886	0.832254	-0.0110714	-0.12 to 0.078
XL-VLDL-TG	Triglycerides in very large VLDL	0.00266654	-0.083 to 0.089	0.951543	0.959186	0.00373464	-0.085 to 0.092
L-VLDL-P	Concentration of large VLDL particles	-0.0432349	-0.127 to 0.041	0.314992	0.401334	-0.0442304	-0.147 to 0.046
L-VLDL-L	Total lipids in large VLDL	-0.0536656	-0.137 to 0.03	0.208413	0.289015	-0.0529407	-0.149 to 0.038
L-VLDL-PL	Phospholipids in large VLDL	-0.0664226	-0.153 to 0.02	0.133291	0.203781	-0.06738	-0.23 to 0.036
L-VLDL-C	Cholesterol in large VLDL	-0.0646163	-0.151 to 0.022	0.14542	0.218427	-0.0630474	-0.178 to 0.037
L-VLDL-CE	Cholesteryl esters in large VLDL	-0.0716073	-0.159 to 0.016	0.110249	0.176258	-0.0721622	-0.193 to 0.026
L-VLDL-FC	Free cholesterol in large VLDL	-0.0567548	-0.143 to 0.029	0.195975	0.276347	-0.0534241	-0.166 to 0.036
L-VLDL-TG	Triglycerides in large VLDL	-0.0551174	-0.136 to 0.026	0.184526	0.264663	-0.0538917	-0.146 to 0.026
M-VLDL-P	Concentration of medium VLDL particles	-0.132347	-0.22 to -0.045	0.00327728	0.00697117	-0.133773	-0.244 to -0.039
M-VLDL-L	Total lipids in medium VLDL	-0.115262	-0.202 to -0.028	0.00965607	0.018935	-0.114781	-0.214 to -0.025
M-VLDL-PL	Phospholipids in medium VLDL	-0.159267	-0.25 to -0.069	0.000606163	0.00155252	-0.160396	-0.489 to -0.046
M-VLDL-C	Cholesterol in medium VLDL	-0.175688	-0.265 to -0.086	0.000136745	0.000413531	-0.17348	-0.296 to -0.078
M-VLDL-CE	Cholesteryl esters in medium VLDL	-0.184297	-0.274 to -0.095	6.21969e-05	0.000208152	-0.184015	-0.301 to -0.084
M-VLDL-FC	Free cholesterol in medium VLDL	-0.152168	-0.241 to -0.063	0.000890783	0.00219203	-0.153243	-0.303 to -0.059
M-VLDL-TG	Triglycerides in medium VLDL	-0.0621826	-0.146 to 0.022	0.146198	0.218427	-0.0586336	-0.158 to 0.022
S-VLDL-P	Concentration of small VLDL particles	-0.0165776	-0.105 to 0.072	0.712466	0.777517	-0.0155464	-0.118 to 0.068
S-VLDL-L	Total lipids in small VLDL	-0.0313433	-0.12 to 0.057	0.488758	0.565338	-0.0314579	-0.129 to 0.066
S-VLDL-PL	Phospholipids in small VLDL	-0.0831553	-0.172 to 0.006	0.0685304	0.116224	-0.0852538	-0.185 to 0.016
S-VLDL-C	Cholesterol in small VLDL	-0.0713388	-0.16 to 0.018	0.116998	0.185094	-0.0739667	-0.173 to 0.026
S-VLDL-CE	Cholesteryl esters in small VLDL	-0.0394721	-0.128 to 0.049	0.384147	0.472154	-0.038828	-0.143 to 0.054
S-VLDL-FC	Free cholesterol in small VLDL	-0.126267	-0.216 to -0.037	0.00577425	0.011726	-0.126189	-0.263 to -0.036
S-VLDL-TG	Triglycerides in small VLDL	0.0314775	-0.055 to 0.118	0.473696	0.558205	0.0331205	-0.066 to 0.119
XS-VLDL-P	Concentration of very small VLDL particles	-0.00127172	-0.089 to 0.087	0.977462	0.977462	-0.00187716	-0.095 to 0.085
XS-VLDL-L	Total lipids in very small VLDL	0.0188385	-0.069 to 0.107	0.675652	0.747086	0.01695	-0.076 to 0.114
XS-VLDL-PL	Phospholipids in very small VLDL	0.06305	-0.025 to 0.151	0.159913	0.236106	0.0626353	-0.025 to 0.149
XS-VLDL-C	Cholesterol in very small VLDL	-0.0561551	-0.144 to 0.032	0.212726	0.291772	-0.0562079	-0.142 to 0.03
XS-VLDL-CE	Cholesteryl esters in very small VLDL	-0.0851855	-0.173 to 0.003	0.058913	0.100593	-0.0854467	-0.177 to 0.003
XS-VLDL-FC	Free cholesterol in very small VLDL	0.00904146	-0.079 to 0.097	0.840506	0.882707	0.0102833	-0.082 to 0.096
XS-VLDL-TG	Triglycerides in very small VLDL	0.115776	0.028 to 0.204	0.0102038	0.019854	0.114372	0.018 to 0.211
IDL-P	Concentration of IDL particles	-0.135087	-0.224 to -0.046	0.00318695	0.00683696	-0.134845	-0.238 to -0.051
IDL-L	Total lipids in IDL	-0.175842	-0.264 to -0.088	0.000104354	0.000327409	-0.176055	-0.275 to -0.084
IDL-PL	Phospholipids in IDL	-0.160599	-0.248 to -0.073	0.000365061	0.00100693	-0.160524	-0.269 to -0.069
IDL-C	Cholesterol in IDL	-0.206939	-0.295 to -0.119	5.17947e-06	2.16675e-05	-0.209026	-0.301 to -0.107
IDL-CE	Cholesteryl esters in IDL	-0.210408	-0.299 to -0.122	3.85608e-06	1.66875e-05	-0.210608	-0.305 to -0.113
IDL-FC	Free cholesterol in IDL	-0.191494	-0.279 to -0.104	2.04569e-05	7.33528e-05	-0.190728	-0.287 to -0.104
IDL-TG	Triglycerides in IDL	0.0979644	0.01 to 0.186	0.0295265	0.0529367	0.0958097	0.008 to 0.187
L-LDL-P	Concentration of large LDL particles	-0.147597	-0.236 to -0.059	0.00114437	0.00273559	-0.148781	-0.252 to -0.056
L-LDL-L	Total lipids in large LDL	-0.241145	-0.329 to -0.153	1.3123e-07	9.14962e-07	-0.242043	-0.405 to -0.152
L-LDL-PL	Phospholipids in large LDL	-0.236581	-0.324 to -0.149	1.97794e-07	1.34179e-06	-0.235336	-0.347 to -0.145
L-LDL-C	Cholesterol in large LDL	-0.25562	-0.344 to -0.167	2.90718e-08	2.43234e-07	-0.259712	-0.503 to -0.154
L-LDL-CE	Cholesteryl esters in large LDL	-0.187057	-0.279 to -0.095	7.59918e-05	0.000250973	-0.192719	-0.679 to -0.063
L-LDL-FC	Free cholesterol in large LDL	-0.267201	-0.355 to -0.18	4.13483e-09	4.71746e-08	-0.269988	-0.464 to -0.18
L-LDL-TG	Triglycerides in large LDL	0.0603037	-0.028 to 0.149	0.181461	0.261763	0.0586302	-0.037 to 0.149
M-LDL-P	Concentration of medium LDL particles	-0.175342	-0.265 to -0.086	0.000134876	0.000412852	-0.174471	-0.272 to -0.077
M-LDL-L	Total lipids in medium LDL	-0.221592	-0.311 to -0.132	1.50936e-06	7.89272e-06	-0.221588	-0.383 to -0.127
M-LDL-PL	Phospholipids in medium LDL	-0.212877	-0.302 to -0.124	3.67855e-06	1.61985e-05	-0.212211	-0.327 to -0.121
M-LDL-C	Cholesterol in medium LDL	-0.239862	-0.329 to -0.151	2.11921e-07	1.39979e-06	-0.24033	-0.506 to -0.136
M-LDL-CE	Cholesteryl esters in medium LDL	-0.184839	-0.277 to -0.093	9.2477e-05	0.000293819	-0.179163	-0.743 to -0.064
M-LDL-FC	Free cholesterol in medium LDL	-0.255692	-0.344 to -0.167	2.4708e-08	2.14456e-07	-0.251125	-0.449 to -0.168
M-LDL-TG	Triglycerides in medium LDL	0.0426527	-0.047 to 0.132	0.348911	0.435705	0.0438939	-0.063 to 0.129
S-LDL-P	Concentration of small LDL particles	-0.151503	-0.24 to -0.063	0.000873898	0.00217177	-0.153436	-0.233 to -0.053
S-LDL-L	Total lipids in small LDL	-0.166608	-0.256 to -0.077	0.000283361	0.000817512	-0.168479	-0.279 to -0.084
S-LDL-PL	Phospholipids in small LDL	-0.108477	-0.198 to -0.019	0.0180386	0.0337168	-0.109991	-0.201 to -0.016
S-LDL-C	Cholesterol in small LDL	-0.207367	-0.296 to -0.119	6.08376e-06	2.38597e-05	-0.209289	-0.323 to -0.121
S-LDL-CE	Cholesteryl esters in small LDL	-0.207148	-0.296 to -0.118	6.03825e-06	2.38597e-05	-0.205662	-0.354 to -0.118
S-LDL-FC	Free cholesterol in small LDL	-0.195127	-0.284 to -0.106	2.24932e-05	7.95181e-05	-0.199172	-0.284 to -0.103
S-LDL-TG	Triglycerides in small LDL	0.0470863	-0.042 to 0.136	0.300531	0.384864	0.0481806	-0.04 to 0.135
XL-HDL-P	Concentration of very large HDL particles	0.0689808	-0.021 to 0.159	0.13396	0.203781	0.0679366	-0.018 to 0.169
XL-HDL-L	Total lipids in very large HDL	0.110779	0.02 to 0.201	0.0168634	0.031825	0.110986	0.023 to 0.205
XL-HDL-PL	Phospholipids in very large HDL	0.117486	0.025 to 0.21	0.0131659	0.0252262	0.116357	0.052 to 0.217
XL-HDL-C	Cholesterol in very large HDL	0.0771625	-0.013 to 0.167	0.094512	0.154042	0.0741847	-0.013 to 0.175
XL-HDL-CE	Cholesteryl esters in very large HDL	0.052747	-0.038 to 0.143	0.254446	0.337915	0.0524865	-0.041 to 0.145
XL-HDL-FC	Free cholesterol in very large HDL	0.158872	0.07 to 0.248	0.000511252	0.00132293	0.160439	0.066 to 0.251
XL-HDL-TG	Triglycerides in very large HDL	0.0767118	-0.013 to 0.166	0.0935821	0.153524	0.0798673	-0.026 to 0.165
L-HDL-P	Concentration of large HDL particles	-0.0603792	-0.15 to 0.03	0.189529	0.270294	-0.057885	-0.155 to 0.036
L-HDL-L	Total lipids in large HDL	-0.0503459	-0.141 to 0.04	0.274831	0.363067	-0.051539	-0.139 to 0.043
L-HDL-PL	Phospholipids in large HDL	-0.053211	-0.144 to 0.037	0.250326	0.334212	-0.0529919	-0.153 to 0.044
L-HDL-C	Cholesterol in large HDL	-0.0497891	-0.14 to 0.04	0.278588	0.366102	-0.0510823	-0.139 to 0.046
L-HDL-CE	Cholesteryl esters in large HDL	-0.0574358	-0.147 to 0.032	0.210411	0.290182	-0.0575827	-0.156 to 0.041
L-HDL-FC	Free cholesterol in large HDL	-0.0222928	-0.113 to 0.068	0.629796	0.702573	-0.0247557	-0.11 to 0.076
L-HDL-TG	Triglycerides in large HDL	-0.0101028	-0.101 to 0.08	0.826817	0.875188	-0.0119189	-0.101 to 0.089
M-HDL-P	Concentration of medium HDL particles	-0.232995	-0.322 to -0.144	4.67043e-07	2.72623e-06	-0.234008	-0.349 to -0.125
M-HDL-L	Total lipids in medium HDL	-0.221807	-0.311 to -0.132	1.70001e-06	8.70824e-06	-0.222211	-0.319 to -0.12
M-HDL-PL	Phospholipids in medium HDL	-0.213114	-0.303 to -0.123	4.45223e-06	1.89408e-05	-0.213209	-0.308 to -0.11
M-HDL-C	Cholesterol in medium HDL	-0.230625	-0.32 to -0.142	5.51857e-07	3.07814e-06	-0.22936	-0.327 to -0.123
M-HDL-CE	Cholesteryl esters in medium HDL	-0.233096	-0.322 to -0.144	3.98819e-07	2.44155e-06	-0.231052	-0.336 to -0.136
M-HDL-FC	Free cholesterol in medium HDL	-0.214911	-0.305 to -0.125	3.51039e-06	1.5734e-05	-0.217089	-0.327 to -0.105
M-HDL-TG	Triglycerides in medium HDL	-0.0584796	-0.148 to 0.031	0.203266	0.285026	-0.0570906	-0.152 to 0.035
S-HDL-P	Concentration of small HDL particles	-0.345177	-0.432 to -0.258	3.94144e-14	1.41329e-12	-0.34427	-0.447 to -0.246
S-HDL-L	Total lipids in small HDL	-0.313194	-0.401 to -0.226	7.53622e-12	1.71963e-10	-0.31126	-0.424 to -0.219
S-HDL-PL	Phospholipids in small HDL	-0.298112	-0.385 to -0.211	6.038e-11	9.47212e-10	-0.295128	-0.402 to -0.205
S-HDL-C	Cholesterol in small HDL	-0.341068	-0.428 to -0.254	7.82964e-14	2.45655e-12	-0.340596	-0.439 to -0.23
S-HDL-CE	Cholesteryl esters in small HDL	-0.356168	-0.442 to -0.27	4.65915e-15	1.94908e-13	-0.356172	-0.451 to -0.255
S-HDL-FC	Free cholesterol in small HDL	-0.257029	-0.346 to -0.168	2.39461e-08	2.14456e-07	-0.259288	-0.365 to -0.152
S-HDL-TG	Triglycerides in small HDL	-0.00705505	-0.096 to 0.081	0.87588	0.904716	-0.00535026	-0.097 to 0.084
XXL-VLDL-PL %	Phospholipids to total lipids ratio in chylomicrons and extremely large VLDL	0.118763	0.027 to 0.21	0.0113641	0.0219415	0.117653	0.022 to 0.234
XXL-VLDL-C %	Cholesterol to total lipids ratio in chylomicrons and extremely large VLDL	0.00469681	-0.078 to 0.087	0.911514	0.933837	0.00347865	-0.077 to 0.092
XXL-VLDL-CE %	Cholesteryl esters to total lipids ratio in chylomicrons and extremely large VLDL	0.00975818	-0.072 to 0.091	0.814111	0.867687	0.00782429	-0.064 to 0.1
XXL-VLDL-FC %	Free cholesterol to total lipids ratio in chylomicrons and extremely large VLDL	0.00775441	-0.081 to 0.096	0.863663	0.8995	0.00796825	-0.093 to 0.095
XXL-VLDL-TG %	Triglycerides to total lipids ratio in chylomicrons and extremely large VLDL	-0.0103519	-0.105 to 0.084	0.82986	0.875188	-0.010969	-0.113 to 0.079
XL-VLDL-PL %	Phospholipids to total lipids ratio in very large VLDL	0.0578646	-0.036 to 0.152	0.226684	0.307555	0.0593697	-0.031 to 0.136
XL-VLDL-C %	Cholesterol to total lipids ratio in very large VLDL	-0.0553773	-0.139 to 0.028	0.195056	0.276347	-0.0560015	-0.154 to 0.056
XL-VLDL-CE %	Cholesteryl esters to total lipids ratio in very large VLDL	-0.0654391	-0.149 to 0.018	0.12358	0.193867	-0.0659016	-0.157 to 0.042
XL-VLDL-FC %	Free cholesterol to total lipids ratio in very large VLDL	0.010613	-0.079 to 0.1	0.815833	0.867687	0.013939	-0.079 to 0.109
XL-VLDL-TG %	Triglycerides to total lipids ratio in very large VLDL	0.0379877	-0.054 to 0.13	0.417551	0.506306	0.0378246	-0.025 to 0.146
L-VLDL-PL %	Phospholipids to total lipids ratio in large VLDL	-0.0562408	-0.149 to 0.037	0.237255	0.320167	-0.0561062	-0.507 to 0.046
L-VLDL-C %	Cholesterol to total lipids ratio in large VLDL	-0.0360225	-0.119 to 0.047	0.393771	0.479789	-0.0366014	-0.157 to 0.051
L-VLDL-CE %	Cholesteryl esters to total lipids ratio in large VLDL	-0.045031	-0.128 to 0.038	0.286021	0.373762	-0.0468656	-0.148 to 0.046
L-VLDL-FC %	Free cholesterol to total lipids ratio in large VLDL	-0.0163356	-0.102 to 0.069	0.707828	0.776845	-0.0162309	-0.14 to 0.089
L-VLDL-TG %	Triglycerides to total lipids ratio in large VLDL	-0.00536803	-0.091 to 0.08	0.902482	0.928373	-0.00285525	-0.104 to 0.115
M-VLDL-PL %	Phospholipids to total lipids ratio in medium VLDL	-0.140407	-0.232 to -0.048	0.00291145	0.00635456	-0.136029	-0.616 to -0.014
M-VLDL-C %	Cholesterol to total lipids ratio in medium VLDL	-0.152354	-0.237 to -0.068	0.000436959	0.00119214	-0.153973	-0.278 to -0.062
M-VLDL-CE %	Cholesteryl esters to total lipids ratio in medium VLDL	-0.145924	-0.231 to -0.061	0.000788865	0.00200005	-0.145648	-0.253 to -0.059
M-VLDL-FC %	Free cholesterol to total lipids ratio in medium VLDL	-0.154305	-0.24 to -0.068	0.000475376	0.00125599	-0.150347	-0.375 to -0.064
M-VLDL-TG %	Triglycerides to total lipids ratio in medium VLDL	0.134086	0.051 to 0.217	0.00169479	0.0038672	0.135099	0.045 to 0.238
S-VLDL-PL %	Phospholipids to total lipids ratio in small VLDL	-0.216117	-0.302 to -0.13	1.28227e-06	6.84786e-06	-0.218075	-0.34 to -0.126
S-VLDL-C %	Cholesterol to total lipids ratio in small VLDL	-0.109947	-0.191 to -0.028	0.00845971	0.0167196	-0.110648	-0.188 to -0.022
S-VLDL-CE %	Cholesteryl esters to total lipids ratio in small VLDL	-0.0285054	-0.108 to 0.051	0.481559	0.562192	-0.0301578	-0.103 to 0.047
S-VLDL-FC %	Free cholesterol to total lipids ratio in small VLDL	-0.230252	-0.316 to -0.144	2.19266e-07	1.41117e-06	-0.230216	-0.377 to -0.142
S-VLDL-TG %	Triglycerides to total lipids ratio in small VLDL	0.141383	0.059 to 0.224	0.000845337	0.0021218	0.14254	0.058 to 0.234
XS-VLDL-PL %	Phospholipids to total lipids ratio in very small VLDL	0.26902	0.182 to 0.356	3.33027e-09	4.17949e-08	0.267843	0.172 to 0.368
XS-VLDL-C %	Cholesterol to total lipids ratio in very small VLDL	-0.250055	-0.336 to -0.164	2.47778e-08	2.14456e-07	-0.250625	-0.338 to -0.164
XS-VLDL-CE %	Cholesteryl esters to total lipids ratio in very small VLDL	-0.262716	-0.349 to -0.177	4.07205e-09	4.71746e-08	-0.262195	-0.351 to -0.168
XS-VLDL-FC %	Free cholesterol to total lipids ratio in very small VLDL	-0.0617331	-0.151 to 0.028	0.175931	0.256737	-0.0622755	-0.149 to 0.014
XS-VLDL-TG %	Triglycerides to total lipids ratio in very small VLDL	0.184618	0.098 to 0.272	3.84129e-05	0.000132077	0.185707	0.1 to 0.269
IDL-PL %	Phospholipids to total lipids ratio in IDL	0.137894	0.048 to 0.228	0.00290175	0.00635456	0.138742	0.028 to 0.243
IDL-C %	Cholesterol to total lipids ratio in IDL	-0.299862	-0.387 to -0.213	4.9195e-11	8.23196e-10	-0.300752	-0.404 to -0.194
IDL-CE %	Cholesteryl esters to total lipids ratio in IDL	-0.278937	-0.367 to -0.191	1.35197e-09	1.78603e-08	-0.277912	-0.388 to -0.182
IDL-FC %	Free cholesterol to total lipids ratio in IDL	-0.143208	-0.23 to -0.057	0.00124642	0.00292386	-0.146137	-0.22 to -0.066
IDL-TG %	Triglycerides to total lipids ratio in IDL	0.326035	0.24 to 0.412	4.67053e-13	1.30256e-11	0.325026	0.237 to 0.426
L-LDL-PL %	Phospholipids to total lipids ratio in large LDL	0.140577	0.048 to 0.233	0.00304738	0.00659389	0.140923	0.015 to 0.59
L-LDL-C %	Cholesterol to total lipids ratio in large LDL	-0.207449	-0.299 to -0.116	1.19533e-05	4.54587e-05	-0.21507	-0.719 to -0.082
L-LDL-CE %	Cholesteryl esters to total lipids ratio in large LDL	-0.13206	-0.225 to -0.039	0.00562351	0.0115697	-0.129517	-0.601 to -0.01
L-LDL-FC %	Free cholesterol to total lipids ratio in large LDL	-0.250059	-0.336 to -0.164	1.854e-08	1.78982e-07	-0.253198	-0.473 to -0.137
L-LDL-TG %	Triglycerides to total lipids ratio in large LDL	0.377347	0.292 to 0.463	6.40324e-17	5.35738e-15	0.376645	0.279 to 0.522
M-LDL-PL %	Phospholipids to total lipids ratio in medium LDL	0.175913	0.084 to 0.268	0.000202703	0.000598569	0.172305	0.055 to 0.624
M-LDL-C %	Cholesterol to total lipids ratio in medium LDL	-0.237565	-0.329 to -0.147	4.58664e-07	2.72623e-06	-0.236719	-0.691 to -0.115
M-LDL-CE %	Cholesteryl esters to total lipids ratio in medium LDL	-0.131602	-0.225 to -0.039	0.00579294	0.011726	-0.12933	-0.617 to -0.009
M-LDL-FC %	Free cholesterol to total lipids ratio in medium LDL	-0.173217	-0.259 to -0.087	8.99593e-05	0.000289485	-0.176307	-0.264 to -0.083
M-LDL-TG %	Triglycerides to total lipids ratio in medium LDL	0.356018	0.27 to 0.442	3.85207e-15	1.93374e-13	0.357264	0.252 to 0.501
S-LDL-PL %	Phospholipids to total lipids ratio in small LDL	0.301674	0.216 to 0.388	2.12074e-11	4.43588e-10	0.299478	0.206 to 0.467
S-LDL-C %	Cholesterol to total lipids ratio in small LDL	-0.36573	-0.449 to -0.282	1.22784e-16	7.70468e-15	-0.363754	-0.55 to -0.269
S-LDL-CE %	Cholesteryl esters to total lipids ratio in small LDL	-0.294677	-0.379 to -0.21	2.87174e-11	5.54466e-10	-0.289181	-0.563 to -0.205
S-LDL-FC %	Free cholesterol to total lipids ratio in small LDL	-0.138041	-0.228 to -0.048	0.00288201	0.00635456	-0.138849	-0.218 to -0.051
S-LDL-TG %	Triglycerides to total lipids ratio in small LDL	0.215023	0.127 to 0.303	2.08072e-06	1.02404e-05	0.217512	0.134 to 0.298
XL-HDL-PL %	Phospholipids to total lipids ratio in very large HDL	0.0943859	0.001 to 0.187	0.0471246	0.0821408	0.097719	0.044 to 0.218
XL-HDL-C %	Cholesterol to total lipids ratio in very large HDL	-0.209561	-0.299 to -0.12	5.91886e-06	2.38597e-05	-0.211745	-0.295 to -0.138
XL-HDL-CE %	Cholesteryl esters to total lipids ratio in very large HDL	-0.262515	-0.349 to -0.176	5.38393e-09	5.87551e-08	-0.263075	-0.361 to -0.185
XL-HDL-FC %	Free cholesterol to total lipids ratio in very large HDL	-0.0408692	-0.133 to 0.051	0.385624	0.472154	-0.0414889	-0.133 to 0.053
XL-HDL-TG %	Triglycerides to total lipids ratio in very large HDL	-0.0406615	-0.132 to 0.05	0.381791	0.472067	-0.0390968	-0.128 to 0.048
L-HDL-PL %	Phospholipids to total lipids ratio in large HDL	0.0133755	-0.072 to 0.099	0.759497	0.81817	0.0161751	-0.072 to 0.098
L-HDL-C %	Cholesterol to total lipids ratio in large HDL	-0.033643	-0.123 to 0.056	0.460671	0.548002	-0.0319034	-0.13 to 0.04
L-HDL-CE %	Cholesteryl esters to total lipids ratio in large HDL	-0.0639831	-0.152 to 0.024	0.156385	0.232264	-0.0647836	-0.145 to 0.023
L-HDL-FC %	Free cholesterol to total lipids ratio in large HDL	0.0824495	-0.009 to 0.174	0.077909	0.130547	0.0807028	-0.008 to 0.167
L-HDL-TG %	Triglycerides to total lipids ratio in large HDL	0.0451481	-0.045 to 0.135	0.326739	0.412118	0.0476185	-0.049 to 0.124
M-HDL-PL %	Phospholipids to total lipids ratio in medium HDL	0.182491	0.099 to 0.266	2.03673e-05	7.33528e-05	0.186275	0.089 to 0.289
M-HDL-C %	Cholesterol to total lipids ratio in medium HDL	-0.154626	-0.241 to -0.069	0.000470446	0.00125599	-0.155319	-0.258 to -0.067
M-HDL-CE %	Cholesteryl esters to total lipids ratio in medium HDL	-0.122873	-0.209 to -0.037	0.00534684	0.0110914	-0.12474	-0.219 to -0.031
M-HDL-FC %	Free cholesterol to total lipids ratio in medium HDL	-0.168649	-0.259 to -0.079	0.000262708	0.000766741	-0.170352	-0.34 to -0.067
M-HDL-TG %	Triglycerides to total lipids ratio in medium HDL	0.0994664	0.011 to 0.188	0.0280972	0.0509295	0.0989212	0.004 to 0.188
S-HDL-PL %	Phospholipids to total lipids ratio in small HDL	0.0652762	-0.019 to 0.15	0.129459	0.200581	0.0682561	-0.018 to 0.143
S-HDL-C %	Cholesterol to total lipids ratio in small HDL	-0.155422	-0.239 to -0.072	0.000302964	0.000864137	-0.157301	-0.235 to -0.064
S-HDL-CE %	Cholesteryl esters to total lipids ratio in small HDL	-0.182167	-0.268 to -0.097	3.59313e-05	0.000125261	-0.185748	-0.266 to -0.087
S-HDL-FC %	Free cholesterol to total lipids ratio in small HDL	0.0635853	-0.021 to 0.149	0.143281	0.216648	0.0615958	-0.05 to 0.147
S-HDL-TG %	Triglycerides to total lipids ratio in small HDL	0.177267	0.09 to 0.265	8.27009e-05	0.000269584	0.178289	0.077 to 0.265
hsCRP	High sensitivity C-Reactive Protein	-	-	-	-	-	-
Regression coefficients (β) are estimated difference in log metabolomic measure at 6 months of age (SD units) per 1 SD increase in 6-month log hsCRP.
Models are adjusted for infant sex, birth weight z-score, gestational age, exact age at 6-month time point, maternal household income, exposure to any breastfeeding, exposure to any maternal smoking during pregnancy, and 6-month blood sample processing time.
Adjusted p-values are based on the Benjamini-Hochberg method of adjustment for multiple comparisons.
Bootstrap estimates are calculated as the mean coefficent across 1000 iterations of bootstrap resampling.
Bootstrap 95% confidence intervals are bias-corrected accelerated percentile confidence intervals.
