# Supplementary material for: Early life infection and proinflammatory, atherogenic metabolomic and lipidomic profiles in infancy: a population-based cohort study
Source: eLife. 2022 May 10;11:e75170. doi: 10.7554/eLife.75170 (PMC9090335; doi:10.7554/eLife.75170)
Supplement: Figure 4—source data 3. [file elife-75170-fig4-data3.xlsx]

## Sheet: Figure 4 - Source Data 3
Figure 4 - Source Data 3. Summary of regression models for difference in 12-month NMR metabolomic measures (adjusted for corresponding 6-month measure) per SD increase in 12-month log hsCRP (adjusted for 6-month hsCRP).
		12-month hsCRP (adjusted for 6-month hsCRP)
Measure	Description	Estimate (β)	95% Confidence Interval	P-value	Adj. P-value	Bootstrap Estimate	Bootstrap 95% Confidence Interval
XXL-VLDL-P	Concentration of chylomicrons and extremely large VLDL particles	-0.08547	-0.176 to 0.005	0.0636607	0.152379	-0.0850708	-0.189 to 0.004
XXL-VLDL-L	Total lipids in chylomicrons and extremely large VLDL	-0.0823953	-0.173 to 0.008	0.0742446	0.16705	-0.0850049	-0.169 to 0.019
XXL-VLDL-PL	Phospholipids in chylomicrons and extremely large VLDL	-0.0798444	-0.171 to 0.011	0.0855173	0.179826	-0.0841102	-0.163 to 0.024
XXL-VLDL-C	Cholesterol in chylomicrons and extremely large VLDL	-0.0277585	-0.118 to 0.062	0.546757	0.672243	-0.0281683	-0.119 to 0.066
XXL-VLDL-CE	Cholesteryl esters in chylomicrons and extremely large VLDL	-0.00676609	-0.097 to 0.083	0.8831	0.903171	-0.00798179	-0.093 to 0.093
XXL-VLDL-FC	Free cholesterol in chylomicrons and extremely large VLDL	-0.0549438	-0.146 to 0.036	0.235572	0.373265	-0.0566296	-0.146 to 0.046
XXL-VLDL-TG	Triglycerides in chylomicrons and extremely large VLDL	-0.0867921	-0.177 to 0.004	0.0602361	0.148251	-0.0863199	-0.173 to 0.005
XL-VLDL-P	Concentration of very large VLDL particles	-0.0848036	-0.175 to 0.006	0.0668861	0.158414	-0.0861572	-0.168 to 0.01
XL-VLDL-L	Total lipids in very large VLDL	-0.0831632	-0.174 to 0.007	0.0722229	0.164143	-0.0850906	-0.171 to 0.016
XL-VLDL-PL	Phospholipids in very large VLDL	-0.0811113	-0.172 to 0.01	0.0800742	0.175807	-0.0838005	-0.167 to 0.01
XL-VLDL-C	Cholesterol in very large VLDL	-0.0660461	-0.156 to 0.024	0.151254	0.277997	-0.0668883	-0.158 to 0.025
XL-VLDL-CE	Cholesteryl esters in very large VLDL	-0.0555772	-0.146 to 0.035	0.227273	0.367887	-0.0521856	-0.154 to 0.029
XL-VLDL-FC	Free cholesterol in very large VLDL	-0.0842103	-0.175 to 0.006	0.0683294	0.160147	-0.0855728	-0.177 to 0.009
XL-VLDL-TG	Triglycerides in very large VLDL	-0.0814098	-0.173 to 0.01	0.0815749	0.176484	-0.0821283	-0.168 to 0.01
L-VLDL-P	Concentration of large VLDL particles	-0.0779964	-0.167 to 0.011	0.0877772	0.17989	-0.0786521	-0.166 to 0.014
L-VLDL-L	Total lipids in large VLDL	-0.0780138	-0.167 to 0.011	0.0879461	0.17989	-0.0779425	-0.17 to 0.009
L-VLDL-PL	Phospholipids in large VLDL	-0.0679754	-0.158 to 0.022	0.139267	0.265552	-0.0680663	-0.16 to 0.03
L-VLDL-C	Cholesterol in large VLDL	-0.0653226	-0.155 to 0.024	0.151972	0.277997	-0.0639679	-0.155 to 0.028
L-VLDL-CE	Cholesteryl esters in large VLDL	-0.0551031	-0.144 to 0.034	0.225347	0.367887	-0.0545248	-0.15 to 0.041
L-VLDL-FC	Free cholesterol in large VLDL	-0.0748012	-0.165 to 0.015	0.103771	0.203031	-0.0757503	-0.174 to 0.025
L-VLDL-TG	Triglycerides in large VLDL	-0.0854547	-0.175 to 0.004	0.0626871	0.151662	-0.0877305	-0.175 to 0.005
M-VLDL-P	Concentration of medium VLDL particles	-0.0330053	-0.119 to 0.053	0.450334	0.603127	-0.0335765	-0.116 to 0.062
M-VLDL-L	Total lipids in medium VLDL	-0.0320719	-0.118 to 0.054	0.463187	0.609457	-0.0345933	-0.117 to 0.056
M-VLDL-PL	Phospholipids in medium VLDL	-0.012481	-0.099 to 0.074	0.777867	0.829107	-0.0167685	-0.093 to 0.087
M-VLDL-C	Cholesterol in medium VLDL	0.0130264	-0.072 to 0.098	0.763647	0.822109	0.0110131	-0.071 to 0.118
M-VLDL-CE	Cholesteryl esters in medium VLDL	0.0362099	-0.048 to 0.121	0.401336	0.546226	0.0367573	-0.064 to 0.13
M-VLDL-FC	Free cholesterol in medium VLDL	-0.0101294	-0.096 to 0.076	0.817497	0.847966	-0.00988602	-0.102 to 0.082
M-VLDL-TG	Triglycerides in medium VLDL	-0.0547612	-0.141 to 0.031	0.213488	0.3639	-0.059162	-0.137 to 0.043
S-VLDL-P	Concentration of small VLDL particles	0.0701363	-0.014 to 0.155	0.104771	0.203219	0.0708439	-0.024 to 0.201
S-VLDL-L	Total lipids in small VLDL	0.0711854	-0.013 to 0.155	0.0981432	0.193704	0.0703366	-0.019 to 0.198
S-VLDL-PL	Phospholipids in small VLDL	0.0772023	-0.007 to 0.161	0.07175	0.164143	0.0779847	-0.012 to 0.204
S-VLDL-C	Cholesterol in small VLDL	0.0858329	0.004 to 0.167	0.0396655	0.104997	0.0863923	-0.004 to 0.222
S-VLDL-CE	Cholesteryl esters in small VLDL	0.0894586	0.006 to 0.173	0.0364488	0.100012	0.0908665	-0.008 to 0.215
S-VLDL-FC	Free cholesterol in small VLDL	0.0921911	0.009 to 0.175	0.0297186	0.0879827	0.0896835	0.004 to 0.22
S-VLDL-TG	Triglycerides in small VLDL	0.0597253	-0.028 to 0.147	0.180897	0.320486	0.0596581	-0.036 to 0.173
XS-VLDL-P	Concentration of very small VLDL particles	0.105969	0.024 to 0.188	0.0112448	0.0395325	0.109121	0.007 to 0.189
XS-VLDL-L	Total lipids in very small VLDL	0.0968993	0.014 to 0.179	0.0217751	0.0690057	0.0949719	0.009 to 0.19
XS-VLDL-PL	Phospholipids in very small VLDL	0.113735	0.029 to 0.199	0.00896138	0.0325421	0.111906	0.024 to 0.223
XS-VLDL-C	Cholesterol in very small VLDL	0.0524767	-0.031 to 0.136	0.218208	0.366395	0.0519138	-0.028 to 0.152
XS-VLDL-CE	Cholesteryl esters in very small VLDL	0.0386956	-0.045 to 0.122	0.365397	0.513839	0.0399241	-0.049 to 0.13
XS-VLDL-FC	Free cholesterol in very small VLDL	0.0762154	-0.009 to 0.161	0.0804806	0.175807	0.0774367	-0.015 to 0.163
XS-VLDL-TG	Triglycerides in very small VLDL	0.146026	0.061 to 0.231	0.000826551	0.00432498	0.145595	0.056 to 0.246
IDL-P	Concentration of IDL particles	0.0403631	-0.041 to 0.122	0.33293	0.496088	0.0402063	-0.049 to 0.131
IDL-L	Total lipids in IDL	0.0397352	-0.043 to 0.123	0.347503	0.503665	0.0410314	-0.05 to 0.127
IDL-PL	Phospholipids in IDL	0.0283616	-0.054 to 0.111	0.501328	0.630161	0.0283313	-0.061 to 0.13
IDL-C	Cholesterol in IDL	0.00987707	-0.074 to 0.094	0.817816	0.847966	0.0114139	-0.081 to 0.105
IDL-CE	Cholesteryl esters in IDL	-0.00646274	-0.091 to 0.078	0.880442	0.903171	-0.00596107	-0.103 to 0.087
IDL-FC	Free cholesterol in IDL	0.0526538	-0.032 to 0.137	0.221614	0.367887	0.0532416	-0.04 to 0.145
IDL-TG	Triglycerides in IDL	0.240109	0.16 to 0.32	8.00236e-09	4.50133e-07	0.237539	0.153 to 0.334
L-LDL-P	Concentration of large LDL particles	0.0173072	-0.064 to 0.099	0.67749	0.77773	0.0171548	-0.08 to 0.114
L-LDL-L	Total lipids in large LDL	0.0310287	-0.052 to 0.114	0.462924	0.609457	0.0308979	-0.06 to 0.128
L-LDL-PL	Phospholipids in large LDL	-0.0106311	-0.094 to 0.073	0.802709	0.84397	-0.0103211	-0.101 to 0.086
L-LDL-C	Cholesterol in large LDL	0.0307184	-0.053 to 0.114	0.472308	0.614273	0.0292277	-0.054 to 0.132
L-LDL-CE	Cholesteryl esters in large LDL	0.0312847	-0.056 to 0.118	0.481281	0.615274	0.0297845	-0.059 to 0.131
L-LDL-FC	Free cholesterol in large LDL	0.0308228	-0.054 to 0.116	0.476396	0.615274	0.032044	-0.058 to 0.124
L-LDL-TG	Triglycerides in large LDL	0.211545	0.132 to 0.291	2.49036e-07	5.3618e-06	0.213972	0.122 to 0.298
M-LDL-P	Concentration of medium LDL particles	0.0152166	-0.065 to 0.096	0.711011	0.790655	0.0145666	-0.081 to 0.104
M-LDL-L	Total lipids in medium LDL	0.0161757	-0.064 to 0.096	0.69228	0.782729	0.0146714	-0.067 to 0.103
M-LDL-PL	Phospholipids in medium LDL	-0.0227299	-0.1 to 0.055	0.566331	0.688781	-0.0201361	-0.098 to 0.076
M-LDL-C	Cholesterol in medium LDL	0.0186009	-0.063 to 0.1	0.655038	0.765921	0.0190255	-0.07 to 0.115
M-LDL-CE	Cholesteryl esters in medium LDL	0.0393042	-0.046 to 0.125	0.368633	0.51517	0.037536	-0.048 to 0.141
M-LDL-FC	Free cholesterol in medium LDL	-0.0148128	-0.093 to 0.063	0.709655	0.790655	-0.0125212	-0.104 to 0.075
M-LDL-TG	Triglycerides in medium LDL	0.175693	0.097 to 0.255	1.59108e-05	0.000154486	0.176292	0.093 to 0.276
S-LDL-P	Concentration of small LDL particles	-0.0177927	-0.099 to 0.063	0.668114	0.770901	-0.0158672	-0.106 to 0.072
S-LDL-L	Total lipids in small LDL	-0.0279667	-0.108 to 0.052	0.495402	0.626706	-0.0252535	-0.113 to 0.063
S-LDL-PL	Phospholipids in small LDL	-0.0883022	-0.168 to -0.009	0.0294592	0.0879827	-0.0884307	-0.168 to 0.021
S-LDL-C	Cholesterol in small LDL	-0.0101773	-0.092 to 0.072	0.807909	0.845486	-0.010551	-0.097 to 0.097
S-LDL-CE	Cholesteryl esters in small LDL	0.0131263	-0.07 to 0.097	0.757824	0.821294	0.0156497	-0.077 to 0.108
S-LDL-FC	Free cholesterol in small LDL	-0.0709742	-0.151 to 0.009	0.0840669	0.178683	-0.0705728	-0.158 to 0.037
S-LDL-TG	Triglycerides in small LDL	0.0843715	0 to 0.169	0.0504407	0.128968	0.0833898	-0.007 to 0.18
XL-HDL-P	Concentration of very large HDL particles	-0.0952176	-0.179 to -0.012	0.0255537	0.0789708	-0.0949563	-0.195 to -0.005
XL-HDL-L	Total lipids in very large HDL	-0.098254	-0.182 to -0.015	0.0213775	0.0687134	-0.0980262	-0.196 to -0.002
XL-HDL-PL	Phospholipids in very large HDL	-0.0375264	-0.123 to 0.048	0.389251	0.535754	-0.0374542	-0.131 to 0.057
XL-HDL-C	Cholesterol in very large HDL	-0.139948	-0.227 to -0.052	0.00182841	0.00894333	-0.13956	-0.228 to -0.033
XL-HDL-CE	Cholesteryl esters in very large HDL	-0.132834	-0.221 to -0.045	0.00319053	0.0143574	-0.135774	-0.224 to -0.026
XL-HDL-FC	Free cholesterol in very large HDL	-0.148062	-0.237 to -0.059	0.00117967	0.00603241	-0.148544	-0.248 to -0.04
XL-HDL-TG	Triglycerides in very large HDL	-0.0130613	-0.105 to 0.079	0.781203	0.829107	-0.010504	-0.125 to 0.075
L-HDL-P	Concentration of large HDL particles	-0.0314813	-0.115 to 0.052	0.461692	0.609457	-0.0285879	-0.122 to 0.063
L-HDL-L	Total lipids in large HDL	-0.0358058	-0.12 to 0.048	0.402993	0.546226	-0.0343699	-0.139 to 0.048
L-HDL-PL	Phospholipids in large HDL	-0.0405479	-0.127 to 0.046	0.357732	0.509429	-0.0403917	-0.129 to 0.053
L-HDL-C	Cholesterol in large HDL	-0.0370964	-0.121 to 0.046	0.384119	0.533498	-0.0343301	-0.124 to 0.056
L-HDL-CE	Cholesteryl esters in large HDL	-0.0346824	-0.119 to 0.049	0.41845	0.56378	-0.0343922	-0.122 to 0.061
L-HDL-FC	Free cholesterol in large HDL	-0.0432989	-0.126 to 0.04	0.307256	0.463977	-0.0431309	-0.137 to 0.043
L-HDL-TG	Triglycerides in large HDL	0.077076	-0.012 to 0.166	0.0900952	0.182019	0.077639	-0.018 to 0.17
M-HDL-P	Concentration of medium HDL particles	-0.221388	-0.307 to -0.136	5.52761e-07	9.56702e-06	-0.218712	-0.31 to -0.127
M-HDL-L	Total lipids in medium HDL	-0.227301	-0.313 to -0.142	2.62133e-07	5.3618e-06	-0.227583	-0.316 to -0.134
M-HDL-PL	Phospholipids in medium HDL	-0.210516	-0.296 to -0.125	1.91639e-06	2.69493e-05	-0.210535	-0.294 to -0.115
M-HDL-C	Cholesterol in medium HDL	-0.239106	-0.324 to -0.155	5.03845e-08	1.41706e-06	-0.235378	-0.329 to -0.148
M-HDL-CE	Cholesteryl esters in medium HDL	-0.245484	-0.33 to -0.161	2.28193e-08	9.28328e-07	-0.242566	-0.351 to -0.16
M-HDL-FC	Free cholesterol in medium HDL	-0.205748	-0.29 to -0.121	2.37166e-06	2.96457e-05	-0.204339	-0.293 to -0.121
M-HDL-TG	Triglycerides in medium HDL	0.0247897	-0.065 to 0.115	0.588366	0.700436	0.025965	-0.074 to 0.118
S-HDL-P	Concentration of small HDL particles	-0.168559	-0.257 to -0.081	0.00019489	0.00121806	-0.168986	-0.268 to -0.069
S-HDL-L	Total lipids in small HDL	-0.174739	-0.263 to -0.087	0.000116379	0.000872844	-0.173436	-0.276 to -0.085
S-HDL-PL	Phospholipids in small HDL	-0.253212	-0.341 to -0.166	2.47554e-08	9.28328e-07	-0.249887	-0.35 to -0.163
S-HDL-C	Cholesterol in small HDL	-0.0324189	-0.126 to 0.061	0.495794	0.626706	-0.0299512	-0.138 to 0.066
S-HDL-CE	Cholesteryl esters in small HDL	0.0178318	-0.077 to 0.113	0.713347	0.790655	0.019169	-0.084 to 0.128
S-HDL-FC	Free cholesterol in small HDL	-0.244112	-0.33 to -0.158	4.48341e-08	1.41706e-06	-0.243146	-0.329 to -0.163
S-HDL-TG	Triglycerides in small HDL	0.124794	0.037 to 0.213	0.00578226	0.0236547	0.124673	0.035 to 0.221
XXL-VLDL-PL %	Phospholipids to total lipids ratio in chylomicrons and extremely large VLDL	-0.124366	-0.234 to -0.015	0.0264661	0.0804713	-0.124849	-0.229 to -0.022
XXL-VLDL-C %	Cholesterol to total lipids ratio in chylomicrons and extremely large VLDL	0.150076	0.04 to 0.26	0.00786367	0.0299886	0.151724	0.036 to 0.256
XXL-VLDL-CE %	Cholesteryl esters to total lipids ratio in chylomicrons and extremely large VLDL	0.152635	0.039 to 0.266	0.00896714	0.0325421	0.155235	0.046 to 0.253
XXL-VLDL-FC %	Free cholesterol to total lipids ratio in chylomicrons and extremely large VLDL	0.00183818	-0.114 to 0.118	0.975171	0.979525	-0.00195118	-0.135 to 0.112
XXL-VLDL-TG %	Triglycerides to total lipids ratio in chylomicrons and extremely large VLDL	-0.0978572	-0.198 to 0.002	0.0562744	0.140686	-0.0972485	-0.199 to 0.021
XL-VLDL-PL %	Phospholipids to total lipids ratio in very large VLDL	-0.0663754	-0.176 to 0.044	0.23809	0.374617	-0.068109	-0.199 to 0.036
XL-VLDL-C %	Cholesterol to total lipids ratio in very large VLDL	0.14724	0.042 to 0.252	0.00619834	0.024904	0.148599	0.038 to 0.36
XL-VLDL-CE %	Cholesteryl esters to total lipids ratio in very large VLDL	0.199706	0.098 to 0.302	0.000153788	0.00101772	0.204365	0.095 to 0.329
XL-VLDL-FC %	Free cholesterol to total lipids ratio in very large VLDL	-0.0542768	-0.168 to 0.06	0.351786	0.504152	-0.0566675	-0.184 to 0.075
XL-VLDL-TG %	Triglycerides to total lipids ratio in very large VLDL	-0.0665515	-0.179 to 0.046	0.245426	0.380833	-0.0671594	-0.2 to 0.054
L-VLDL-PL %	Phospholipids to total lipids ratio in large VLDL	0.143271	0.047 to 0.24	0.0037901	0.0160901	0.142752	0.046 to 0.272
L-VLDL-C %	Cholesterol to total lipids ratio in large VLDL	0.0981377	0.009 to 0.187	0.0315664	0.0922395	0.0990695	0.011 to 0.196
L-VLDL-CE %	Cholesteryl esters to total lipids ratio in large VLDL	0.125104	0.033 to 0.217	0.00783107	0.0299886	0.12702	0.021 to 0.221
L-VLDL-FC %	Free cholesterol to total lipids ratio in large VLDL	-0.017869	-0.117 to 0.081	0.723165	0.793718	-0.0202948	-0.128 to 0.083
L-VLDL-TG %	Triglycerides to total lipids ratio in large VLDL	-0.137605	-0.229 to -0.046	0.00328536	0.0144942	-0.13929	-0.23 to -0.026
M-VLDL-PL %	Phospholipids to total lipids ratio in medium VLDL	0.107927	0.018 to 0.198	0.0190692	0.0646263	0.10833	0.021 to 0.197
M-VLDL-C %	Cholesterol to total lipids ratio in medium VLDL	0.114487	0.026 to 0.203	0.0119084	0.0412214	0.11534	0.005 to 0.218
M-VLDL-CE %	Cholesteryl esters to total lipids ratio in medium VLDL	0.116293	0.028 to 0.204	0.0100564	0.0359156	0.117038	0.016 to 0.215
M-VLDL-FC %	Free cholesterol to total lipids ratio in medium VLDL	0.0442003	-0.051 to 0.139	0.362729	0.513296	0.0458488	-0.049 to 0.171
M-VLDL-TG %	Triglycerides to total lipids ratio in medium VLDL	-0.136458	-0.222 to -0.051	0.00192596	0.00902794	-0.136203	-0.233 to -0.03
S-VLDL-PL %	Phospholipids to total lipids ratio in small VLDL	-0.0467361	-0.138 to 0.045	0.318115	0.477172	-0.0455599	-0.133 to 0.039
S-VLDL-C %	Cholesterol to total lipids ratio in small VLDL	0.0431444	-0.046 to 0.132	0.344213	0.502908	0.0445875	-0.044 to 0.138
S-VLDL-CE %	Cholesteryl esters to total lipids ratio in small VLDL	0.0207933	-0.072 to 0.114	0.660646	0.766213	0.0205772	-0.078 to 0.117
S-VLDL-FC %	Free cholesterol to total lipids ratio in small VLDL	0.05064	-0.036 to 0.137	0.25121	0.387138	0.0492106	-0.024 to 0.142
S-VLDL-TG %	Triglycerides to total lipids ratio in small VLDL	-0.032381	-0.12 to 0.055	0.469598	0.614273	-0.0326324	-0.121 to 0.056
XS-VLDL-PL %	Phospholipids to total lipids ratio in very small VLDL	0.0822395	-0.013 to 0.177	0.0906049	0.182019	0.0810516	-0.019 to 0.195
XS-VLDL-C %	Cholesterol to total lipids ratio in very small VLDL	-0.0984418	-0.19 to -0.007	0.0355593	0.100012	-0.0965636	-0.191 to -0.014
XS-VLDL-CE %	Cholesteryl esters to total lipids ratio in very small VLDL	-0.098379	-0.19 to -0.007	0.0360435	0.100012	-0.0982197	-0.194 to -0.012
XS-VLDL-FC %	Free cholesterol to total lipids ratio in very small VLDL	-0.0187824	-0.113 to 0.076	0.697489	0.784675	-0.0198621	-0.11 to 0.084
XS-VLDL-TG %	Triglycerides to total lipids ratio in very small VLDL	0.0548819	-0.035 to 0.144	0.229591	0.368985	0.0554947	-0.03 to 0.152
IDL-PL %	Phospholipids to total lipids ratio in IDL	-0.0685751	-0.16 to 0.023	0.143396	0.271127	-0.0669738	-0.171 to 0.024
IDL-C %	Cholesterol to total lipids ratio in IDL	-0.122249	-0.211 to -0.033	0.00734504	0.0289936	-0.120551	-0.221 to -0.013
IDL-CE %	Cholesteryl esters to total lipids ratio in IDL	-0.181596	-0.27 to -0.093	7.16095e-05	0.000575433	-0.179066	-0.277 to -0.085
IDL-FC %	Free cholesterol to total lipids ratio in IDL	0.0635855	-0.031 to 0.159	0.190626	0.335084	0.0647089	-0.033 to 0.177
IDL-TG %	Triglycerides to total lipids ratio in IDL	0.195095	0.108 to 0.282	1.2832e-05	0.000131236	0.195899	0.093 to 0.291
L-LDL-PL %	Phospholipids to total lipids ratio in large LDL	-0.131216	-0.219 to -0.044	0.00351577	0.0152125	-0.132099	-0.24 to -0.037
L-LDL-C %	Cholesterol to total lipids ratio in large LDL	0.00610911	-0.084 to 0.096	0.894334	0.910521	0.0113199	-0.09 to 0.135
L-LDL-CE %	Cholesteryl esters to total lipids ratio in large LDL	0.0216969	-0.065 to 0.108	0.624162	0.739139	0.0236194	-0.06 to 0.138
L-LDL-FC %	Free cholesterol to total lipids ratio in large LDL	-0.0508051	-0.141 to 0.04	0.272514	0.414295	-0.0489994	-0.147 to 0.044
L-LDL-TG %	Triglycerides to total lipids ratio in large LDL	0.172776	0.086 to 0.26	0.000113045	0.000872844	0.171388	0.08 to 0.274
M-LDL-PL %	Phospholipids to total lipids ratio in medium LDL	-0.0681687	-0.163 to 0.027	0.159446	0.284907	-0.0666003	-0.166 to 0.034
M-LDL-C %	Cholesterol to total lipids ratio in medium LDL	-0.000614467	-0.093 to 0.092	0.989602	0.989602	-0.00163144	-0.088 to 0.099
M-LDL-CE %	Cholesteryl esters to total lipids ratio in medium LDL	-0.005887	-0.103 to 0.092	0.905874	0.918115	-0.0058114	-0.127 to 0.084
M-LDL-FC %	Free cholesterol to total lipids ratio in medium LDL	-0.0941628	-0.19 to 0.002	0.0547912	0.138517	-0.0930492	-0.203 to 0.018
M-LDL-TG %	Triglycerides to total lipids ratio in medium LDL	0.189725	0.102 to 0.278	2.83395e-05	0.000245245	0.189235	0.103 to 0.289
S-LDL-PL %	Phospholipids to total lipids ratio in small LDL	-0.081198	-0.176 to 0.014	0.0939573	0.187083	-0.0809819	-0.189 to 0.017
S-LDL-C %	Cholesterol to total lipids ratio in small LDL	0.0298914	-0.064 to 0.124	0.534241	0.660462	0.0297702	-0.056 to 0.138
S-LDL-CE %	Cholesteryl esters to total lipids ratio in small LDL	0.0349576	-0.062 to 0.132	0.481028	0.615274	0.0366528	-0.061 to 0.138
S-LDL-FC %	Free cholesterol to total lipids ratio in small LDL	-0.135949	-0.23 to -0.041	0.00504311	0.021013	-0.134804	-0.237 to -0.03
S-LDL-TG %	Triglycerides to total lipids ratio in small LDL	0.144347	0.054 to 0.235	0.00191114	0.00902794	0.142297	0.049 to 0.244
XL-HDL-PL %	Phospholipids to total lipids ratio in very large HDL	0.169537	0.076 to 0.263	0.000395248	0.00222327	0.17391	0.065 to 0.257
XL-HDL-C %	Cholesterol to total lipids ratio in very large HDL	-0.222584	-0.314 to -0.131	2.36184e-06	2.96457e-05	-0.228819	-0.314 to -0.122
XL-HDL-CE %	Cholesteryl esters to total lipids ratio in very large HDL	-0.173258	-0.265 to -0.081	0.000249587	0.00151776	-0.176006	-0.268 to -0.074
XL-HDL-FC %	Free cholesterol to total lipids ratio in very large HDL	-0.217885	-0.314 to -0.121	1.20612e-05	0.000129227	-0.215272	-0.332 to -0.113
XL-HDL-TG %	Triglycerides to total lipids ratio in very large HDL	0.0816389	-0.011 to 0.174	0.0841796	0.178683	0.0831726	-0.024 to 0.179
L-HDL-PL %	Phospholipids to total lipids ratio in large HDL	-0.0233401	-0.107 to 0.061	0.586661	0.700436	-0.023058	-0.114 to 0.066
L-HDL-C %	Cholesterol to total lipids ratio in large HDL	-0.0929773	-0.18 to -0.006	0.0373444	0.101235	-0.0926049	-0.181 to 0.005
L-HDL-CE %	Cholesteryl esters to total lipids ratio in large HDL	-0.0895474	-0.179 to 0	0.0503895	0.128968	-0.0880295	-0.188 to -0.001
L-HDL-FC %	Free cholesterol to total lipids ratio in large HDL	-0.0942761	-0.181 to -0.007	0.0339643	0.097974	-0.0943988	-0.186 to -0.007
L-HDL-TG %	Triglycerides to total lipids ratio in large HDL	0.174511	0.084 to 0.265	0.000180144	0.00115807	0.175094	0.082 to 0.272
M-HDL-PL %	Phospholipids to total lipids ratio in medium HDL	0.233713	0.144 to 0.323	4.67223e-07	8.76043e-06	0.229715	0.137 to 0.341
M-HDL-C %	Cholesterol to total lipids ratio in medium HDL	-0.219421	-0.306 to -0.133	9.09242e-07	1.46128e-05	-0.21627	-0.315 to -0.123
M-HDL-CE %	Cholesteryl esters to total lipids ratio in medium HDL	-0.220128	-0.308 to -0.132	1.27551e-06	1.91327e-05	-0.218542	-0.319 to -0.128
M-HDL-FC %	Free cholesterol to total lipids ratio in medium HDL	-0.144632	-0.227 to -0.063	0.00059246	0.00325131	-0.146148	-0.232 to -0.065
M-HDL-TG %	Triglycerides to total lipids ratio in medium HDL	0.167513	0.082 to 0.253	0.000134714	0.000977764	0.165462	0.078 to 0.263
S-HDL-PL %	Phospholipids to total lipids ratio in small HDL	-0.160964	-0.253 to -0.069	0.000629144	0.00337042	-0.161062	-0.265 to -0.061
S-HDL-C %	Cholesterol to total lipids ratio in small HDL	0.102036	0.007 to 0.197	0.0357782	0.100012	0.101559	0.006 to 0.213
S-HDL-CE %	Cholesteryl esters to total lipids ratio in small HDL	0.11494	0.019 to 0.211	0.0192443	0.0646263	0.115182	0.011 to 0.25
S-HDL-FC %	Free cholesterol to total lipids ratio in small HDL	-0.181627	-0.274 to -0.089	0.000139698	0.000982248	-0.184005	-0.289 to -0.075
S-HDL-TG %	Triglycerides to total lipids ratio in small HDL	0.194847	0.107 to 0.283	1.73485e-05	0.000156136	0.192847	0.102 to 0.292
VLDL particle size	Average diameter for VLDL particles	-0.117949	-0.206 to -0.03	0.0088994	0.0325421	-0.119134	-0.205 to -0.035
LDL particle size	Average diameter for LDL particles	0.235489	0.147 to 0.324	2.42594e-07	5.3618e-06	0.237315	0.137 to 0.334
HDL particle size	Average diameter for HDL particles	-0.0630345	-0.141 to 0.015	0.114338	0.21988	-0.0637138	-0.151 to 0.03
Total-C	Total cholesterol	-0.0516734	-0.135 to 0.032	0.226243	0.367887	-0.0495989	-0.145 to 0.048
VLDL-C	VLDL cholesterol	0.0113825	-0.073 to 0.096	0.792357	0.836997	0.0106946	-0.086 to 0.101
Remnant-C	Remnant cholesterol (non-HDL, non-LDL -cholesterol)	0.00838581	-0.074 to 0.091	0.842104	0.869144	0.0100469	-0.089 to 0.098
LDL-C	LDL cholesterol	0.0188997	-0.064 to 0.102	0.65699	0.765921	0.0200927	-0.074 to 0.107
HDL-C	HDL cholesterol	-0.170336	-0.249 to -0.091	2.98207e-05	0.000248506	-0.170367	-0.265 to -0.092
Total triglycerides	Total triglycerides	0.00369895	-0.086 to 0.093	0.935476	0.943866	0.00198653	-0.081 to 0.098
VLDL-TG	Triglycerides in VLDL	-0.0425333	-0.131 to 0.046	0.349208	0.503665	-0.0435084	-0.127 to 0.047
LDL-TG	Triglycerides in LDL	0.179	0.098 to 0.26	1.64785e-05	0.000154486	0.177039	0.092 to 0.267
HDL-TG	Triglycerides in HDL	0.0826248	-0.007 to 0.172	0.0704909	0.16351	0.0828485	0.003 to 0.167
Phosphoglycerides	Phosphoglycerides	-0.0625225	-0.147 to 0.022	0.148187	0.277851	-0.0587269	-0.155 to 0.033
TG/PG	Ratio of triglycerides to phosphoglycerides	0.0256299	-0.065 to 0.116	0.578876	0.696509	0.0241813	-0.065 to 0.12
Phosphatidylcholines	Phosphatidylcholines	-0.0160122	-0.104 to 0.072	0.722627	0.793718	-0.0175954	-0.1 to 0.095
Sphingomyelins	Sphingomyelins	-0.0360555	-0.118 to 0.046	0.390505	0.535754	-0.0348633	-0.122 to 0.053
Total cholines	Total cholines	0.013367	-0.072 to 0.099	0.759241	0.821294	0.0138256	-0.071 to 0.11
ApoA1	Apolipoprotein A1	-0.189905	-0.272 to -0.107	8.133e-06	9.63119e-05	-0.188284	-0.279 to -0.103
ApoB	Apolipoprotein B	-0.0139868	-0.095 to 0.067	0.734969	0.802757	-0.012595	-0.101 to 0.078
ApoB/ApoA1	Ratio of apolipoprotein B to apolipoprotein A1	0.0834117	0.005 to 0.162	0.0380869	0.102018	0.084061	-0.004 to 0.169
Total fatty acids	Total fatty acids	-0.0423699	-0.13 to 0.045	0.341729	0.502908	-0.041166	-0.135 to 0.055
Unsaturation	Degree of unsaturation	-0.0273372	-0.118 to 0.064	0.556119	0.680037	-0.0258718	-0.123 to 0.071
DHA	Docosahexaenoic acid	-0.047956	-0.124 to 0.028	0.216303	0.365927	-0.0501624	-0.112 to 0.035
LA	Linoleic acid	-0.0651501	-0.154 to 0.023	0.149539	0.277997	-0.0630801	-0.161 to 0.032
Omega-3	Omega-3 fatty acids	-0.139325	-0.224 to -0.055	0.0012908	0.00645401	-0.136501	-0.228 to -0.053
Omega-6	Omega-6 fatty acids	-0.0623382	-0.148 to 0.024	0.156682	0.284301	-0.0607483	-0.157 to 0.034
PUFA	Polyunsaturated fatty acids	-0.0772803	-0.163 to 0.008	0.0774837	0.172612	-0.0769997	-0.169 to 0.019
MUFA	Monounsaturated fatty acids	0.0262918	-0.065 to 0.118	0.572861	0.692977	0.0240722	-0.068 to 0.127
SFA	Saturated fatty acids	-0.0566916	-0.143 to 0.03	0.199424	0.347833	-0.0582832	-0.147 to 0.032
DHA %	Ratio of docosahexaenoic acid to total fatty acids	-0.0519725	-0.132 to 0.028	0.201311	0.348423	-0.0532834	-0.124 to 0.025
LA %	Ratio of linoleic acid to total fatty acids	-0.0620898	-0.159 to 0.034	0.207587	0.356542	-0.0630063	-0.164 to 0.043
Omega-3 %	Ratio of omega-3 fatty acids to total fatty acids	-0.158496	-0.245 to -0.072	0.000367705	0.00212137	-0.15757	-0.253 to -0.076
Omega-6 %	Ratio of omega-6 fatty acids to total fatty acids	-0.0536876	-0.149 to 0.042	0.272127	0.414295	-0.0510277	-0.167 to 0.042
PUFA %	Ratio of polyunsaturated fatty acids to total fatty acids	-0.0918274	-0.188 to 0.004	0.0606184	0.148251	-0.0927008	-0.202 to 0.014
MUFA %	Ratio of monounsaturated fatty acids to total fatty acids	0.138793	0.05 to 0.228	0.00230755	0.0105959	0.141444	0.035 to 0.238
SFA %	Ratio of saturated fatty acids to total fatty acids	-0.0535061	-0.143 to 0.036	0.244211	0.380833	-0.0544821	-0.145 to 0.029
Glucose	Glucose	-0.0207373	-0.083 to 0.042	0.515531	0.640853	-0.021876	-0.088 to 0.058
Lactate	Lactate	-0.0243483	-0.064 to 0.016	0.23251	0.371026	-0.0229071	-0.073 to 0.013
Pyruvate	Pyruvate	-0.0323794	-0.085 to 0.02	0.22441	0.367887	-0.0315469	-0.094 to 0.029
Citrate	Citrate	-0.108062	-0.199 to -0.017	0.0209295	0.0682482	-0.105508	-0.208 to -0.023
Glycerol	Glycerol	-0.0356329	-0.141 to 0.07	0.508377	0.635471	-0.0346176	-0.143 to 0.082
Alanine	Alanine	-0.22044	-0.286 to -0.155	1.404e-10	1.053e-08	-0.221238	-0.284 to -0.147
Glutamine	Glutamine	-0.157453	-0.242 to -0.073	0.000308038	0.00182391	-0.160517	-0.247 to -0.062
Glycine	Glycine	-0.0906604	-0.167 to -0.014	0.0204246	0.0675814	-0.0898408	-0.168 to -0.017
Histidine	Histidine	-0.173717	-0.249 to -0.098	8.59163e-06	9.66559e-05	-0.172548	-0.256 to -0.1
Isoleucine	Isoleucine	-0.0215451	-0.11 to 0.067	0.633903	0.746744	-0.0226369	-0.11 to 0.065
Leucine	Leucine	-0.0415579	-0.127 to 0.044	0.342858	0.502908	-0.03994	-0.133 to 0.033
Valine	Valine	-0.0168363	-0.1 to 0.066	0.690004	0.782729	-0.0158991	-0.09 to 0.059
Phenylalanine	Phenylalanine	0.160864	0.078 to 0.243	0.000150908	0.00101772	0.158063	0.082 to 0.247
Tyrosine	Tyrosine	-0.0761671	-0.163 to 0.011	0.0864801	0.17989	-0.0749841	-0.161 to 0.004
Acetate	Acetate	-0.0858578	-0.161 to -0.011	0.0256216	0.0789708	-0.0873921	-0.166 to -0.01
Acetoacetate	Acetoacetate	-0.0132928	-0.102 to 0.075	0.767921	0.822773	-0.0148004	-0.106 to 0.083
3-hydroxybutyrate	Beta-hydroxybutyrate	0.059776	-0.023 to 0.143	0.159548	0.284907	0.0590224	-0.017 to 0.133
Creatinine	Creatinine	0.0181706	-0.071 to 0.107	0.689361	0.782729	0.0174397	-0.073 to 0.114
Albumin	Albumin	-0.0874688	-0.172 to -0.003	0.0441304	0.115457	-0.0862436	-0.175 to 0.004
Glycoprotein acetyls	Glycoprotein acetyls	0.485602	0.411 to 0.56	3.26334e-32	3.67126e-30	0.48515	0.402 to 0.571
hsCRP	High sensitivity C-Reactive Protein	-	-	-	-	-	-
Regression coefficients (β) are estimated difference in log metabolomic measure at 12 months of age (SD units) (adjusted for 6-month metabolomic measure) per 1 SD increase in 12-month log hsCRP (adjusted for 6-month hsCRP).
Models are adjusted for infant sex, birth weight z-score, gestational age, exact age at 6-month and 12-month time point, maternal household income, exposure to any breastfeeding, exposure to any maternal smoking during pregnancy, and 6-month and 12-month blood sample processing time.
Adjusted p-values are based on the Benjamini-Hochberg method of adjustment for multiple comparisons.
Bootstrap estimates are calculated as the mean coefficent across 1000 iterations of bootstrap resampling.
Bootstrap 95% confidence intervals are bias-corrected accelerated percentile confidence intervals.
