# Supplementary material for: Early life infection and proinflammatory, atherogenic metabolomic and lipidomic profiles in infancy: a population-based cohort study
Source: eLife. 2022 May 10;11:e75170. doi: 10.7554/eLife.75170 (PMC9090335; doi:10.7554/eLife.75170)
Supplement: Figure 5—source data 1. [file elife-75170-fig5-data1.xlsx]

## Sheet: Figure 5 - Source Data 1
Figure 5 - Source Data 1. Summary of regression models for difference in 12-month LC/MS lipidomic measures per 1 increase in parent-reported infection from birth to 12 months of age or per SD increase in 12-month log GlycA.
		Parent reported infections from birth to 12 months						12-month GlycA
Measure	Class Name	Estimate (β)	95% Confidence Interval	P-value	Adj. P-value	Bootstrap Estimate	Bootstrap 95% Confidence Interval	Estimate (β)	95% Confidence Interval	P-value	Adj. P-value	Bootstrap Estimate	Bootstrap 95% Confidence Interval
Total Sph	Sphingosines	0.00840656	-0.01 to 0.027	0.377796	0.70162	0.00831109	-0.017 to 0.027	0.09065	0.03 to 0.151	0.00363473	0.007348	0.0909356	0.034 to 0.151
Total S1P	Sphingosine phosphates	-0.00494296	-0.023 to 0.013	0.598514	0.933681	-0.0039541	-0.03 to 0.015	-0.0954344	-0.155 to -0.036	0.00185042	0.00400925	-0.0956321	-0.143 to -0.042
Total dhCer	Dihydro-ceramides	-0.00640197	-0.032 to 0.019	0.626947	0.94042	-0.00703603	-0.029 to 0.02	0.0618432	-0.026 to 0.15	0.167832	0.251748	0.0609549	-0.025 to 0.153
Total Cer	Ceramides	-0.00128326	-0.028 to 0.025	0.924927	0.991684	-0.00126914	-0.027 to 0.026	0.151383	0.065 to 0.238	0.000673123	0.00164074	0.150695	0.061 to 0.236
Total C1P	Ceramide-1-phosphate	-0.0395335	-0.066 to -0.013	0.0030734	0.0399542	-0.0381339	-0.062 to -0.015	-0.253502	-0.337 to -0.17	4.95244e-09	2.41432e-08	-0.250803	-0.346 to -0.175
Total MHC	Hexosyl-ceramides	-0.00134625	-0.027 to 0.024	0.917908	0.991684	-0.00151524	-0.028 to 0.026	0.0562343	-0.031 to 0.144	0.2075	0.299722	0.054456	-0.036 to 0.159
Total DHC	Di-hexosyl-ceramides	0.0288559	0.002 to 0.056	0.0359159	0.17509	0.0283039	0.002 to 0.056	0.290901	0.206 to 0.376	5.73138e-11	5.11577e-10	0.288122	0.195 to 0.384
Total THC	Tri-hexosyl-ceramides	-0.0408954	-0.067 to -0.014	0.0025385	0.0399542	-0.040777	-0.065 to -0.016	-0.215343	-0.302 to -0.129	1.46892e-06	4.77397e-06	-0.213932	-0.312 to -0.136
Total GM3	GM3-gangliosides	-0.00361483	-0.03 to 0.023	0.789018	0.991684	-0.00393218	-0.029 to 0.022	0.141741	0.054 to 0.23	0.00170423	0.00390971	0.141545	0.042 to 0.243
Total GM1	GM1-gangliosides	0.000830991	-0.026 to 0.028	0.951574	0.991684	0.000159093	-0.025 to 0.029	0.0695723	-0.019 to 0.158	0.124973	0.203081	0.0699337	-0.022 to 0.176
Total Sulfatide	Sulfatides	-0.019334	-0.046 to 0.007	0.152529	0.396575	-0.0186654	-0.048 to 0.007	-0.130649	-0.219 to -0.043	0.0037682	0.007348	-0.130374	-0.221 to -0.044
Total SM	Sphingomyelins	-0.0144795	-0.041 to 0.012	0.288005	0.591167	-0.0141711	-0.037 to 0.011	0.0229691	-0.065 to 0.111	0.610942	0.661853	0.0238385	-0.066 to 0.109
Total PA	Phosphatidic acid	-0.00728121	-0.023 to 0.008	0.356668	0.695502	-0.00714282	-0.026 to 0.007	-0.0603681	-0.112 to -0.009	0.0210979	0.0374008	-0.061086	-0.129 to -0.006
Total PC	Phosphatidylcholines	-0.000487298	-0.027 to 0.026	0.971629	0.991684	-0.000265034	-0.027 to 0.026	0.0015222	-0.086 to 0.089	0.972728	0.983034	0.00211439	-0.102 to 0.091
Total PC_O	Alkyl phosphatidylcholines	0.00273949	-0.024 to 0.029	0.839058	0.991684	0.0029853	-0.021 to 0.029	-0.047582	-0.135 to 0.04	0.28781	0.374153	-0.0467515	-0.136 to 0.048
Total PC_P	Alkenyl phosphatidylcholines	-0.0264341	-0.052 to -0.001	0.0444334	0.178451	-0.0274498	-0.049 to 0.001	-0.28404	-0.367 to -0.201	6.55868e-11	5.11577e-10	-0.281842	-0.372 to -0.2
Total LPC	Lysophosphatidylcholines	-0.0136389	-0.033 to 0.006	0.173241	0.422276	-0.0132942	-0.036 to 0.007	-0.0355462	-0.101 to 0.029	0.284065	0.374153	-0.0342288	-0.107 to 0.024
Total LPC_O	Lysoalkyl phosphatidylcholines	0.00487354	-0.012 to 0.022	0.569783	0.925897	0.00482886	-0.017 to 0.021	0.0211256	-0.034 to 0.076	0.452465	0.504175	0.0204915	-0.03 to 0.071
Total LPC_P	Lysoalkenyl phosphatidylcholines	-0.0221882	-0.04 to -0.004	0.0157643	0.0878297	-0.0212765	-0.042 to -0.003	-0.139181	-0.197 to -0.082	2.86418e-06	8.59253e-06	-0.137494	-0.196 to -0.09
Total PE	Phosphatidylethanolamines	0.0259476	0 to 0.052	0.0503322	0.178451	0.0255473	0 to 0.054	0.278232	0.194 to 0.363	2.76877e-10	1.7997e-09	0.27668	0.181 to 0.374
Total PE_O	Alkylphosphatidylethanolamines	-0.0332855	-0.059 to -0.007	0.0127948	0.0878297	-0.0338689	-0.056 to -0.01	-0.301718	-0.386 to -0.218	6.50335e-12	8.45436e-11	-0.300657	-0.393 to -0.214
Total PE_P	Alkenylphosphatidylethanolamines	-0.0332095	-0.059 to -0.007	0.0119977	0.0878297	-0.0333696	-0.057 to -0.008	-0.222937	-0.308 to -0.138	3.7528e-07	1.33054e-06	-0.221521	-0.309 to -0.139
Total LPE	Lysophosphatidylethanolamines	-0.00471653	-0.03 to 0.021	0.715513	0.991684	-0.00440205	-0.032 to 0.021	0.041641	-0.043 to 0.126	0.333126	0.393694	0.0428964	-0.046 to 0.117
Total LPE_P	Lysoalkenylphosphatidylethanolamines	-0.018043	-0.036 to 0	0.048009	0.178451	-0.017471	-0.038 to 0.001	-0.0259861	-0.085 to 0.033	0.387661	0.44467	-0.0243055	-0.087 to 0.024
Total PI	Phosphatidylinositols	-0.000154038	-0.027 to 0.027	0.991007	0.991684	-0.000456937	-0.026 to 0.025	0.04587	-0.042 to 0.134	0.308065	0.386539	0.0465502	-0.056 to 0.13
Total PIP1	Phosphatidylinositol phosphate	-0.000127228	-0.024 to 0.024	0.991684	0.991684	-0.000225715	-0.023 to 0.021	-0.0464402	-0.125 to 0.032	0.248508	0.346137	-0.0459463	-0.132 to 0.029
Total LPI	Lysophosphatidylinositols	0.00229345	-0.023 to 0.028	0.86098	0.991684	0.00238759	-0.023 to 0.028	0.117612	0.033 to 0.202	0.0063637	0.0118183	0.11879	0.033 to 0.199
Total PS	Phosphatidylserines	-0.00157281	-0.021 to 0.017	0.870793	0.991684	-0.00101738	-0.024 to 0.017	0.12146	0.061 to 0.182	0.000105248	0.000293191	0.121768	0.039 to 0.181
Total PG	Phosphatidylglycerols	0.0158607	-0.01 to 0.042	0.236066	0.511476	0.0158527	-0.01 to 0.044	0.230401	0.145 to 0.316	1.71924e-07	6.70504e-07	0.231948	0.136 to 0.328
Total CE	Cholesteryl esters	-0.0324273	-0.059 to -0.006	0.0155655	0.0878297	-0.0323259	-0.057 to -0.007	-0.252692	-0.337 to -0.169	7.29196e-09	3.15985e-08	-0.253363	-0.341 to -0.166
Total COH	Free cholesterol	-0.0100879	-0.036 to 0.016	0.44756	0.793401	-0.0100361	-0.035 to 0.013	0.0451314	-0.043 to 0.133	0.31716	0.386539	0.0454986	-0.046 to 0.143
Total DE	Dehydro-cholesteryl esters	-0.0516048	-0.078 to -0.026	0.000109728	0.0042794	-0.0509827	-0.076 to -0.025	-0.408933	-0.488 to -0.329	6.52484e-22	2.54469e-20	-0.407706	-0.487 to -0.329
Total FFA	Free fatty acids	0.00128641	-0.02 to 0.022	0.903534	0.991684	0.00128828	-0.017 to 0.021	-0.0686453	-0.139 to 0.001	0.055427	0.093985	-0.0685438	-0.132 to -0.006
Total Acylcarnitine	Acylcarnitines	-0.0149997	-0.033 to 0.003	0.0976516	0.317368	-0.0143417	-0.034 to 0.002	-0.107421	-0.166 to -0.049	0.000324714	0.000844257	-0.106988	-0.163 to -0.052
Total DG	Diacylglycerols	0.0211905	-0.005 to 0.047	0.110271	0.330813	0.0208812	-0.004 to 0.05	0.316911	0.235 to 0.399	1.50681e-13	2.93829e-12	0.317294	0.233 to 0.395
Total TG	Triacylglycerols	0.021022	-0.006 to 0.048	0.122516	0.341294	0.0205998	-0.006 to 0.047	0.27071	0.186 to 0.355	7.40582e-10	4.1261e-09	0.271834	0.189 to 0.351
Total TG_O	Alkyldiacylglycerols	-0.0167201	-0.043 to 0.009	0.20483	0.469904	-0.0169121	-0.039 to 0.006	0.000955666	-0.087 to 0.089	0.983034	0.983034	0.00495826	-0.096 to 0.1
Total Ubiquinone	Ubiquinone	-0.00925259	-0.035 to 0.017	0.484584	0.821685	-0.00845544	-0.038 to 0.013	0.00302702	-0.085 to 0.091	0.946172	0.983034	0.00458266	-0.093 to 0.092
Total OxSpecies	Oxidised species	0.00331753	-0.024 to 0.03	0.808859	0.991684	0.00271015	-0.027 to 0.04	0.0650111	-0.023 to 0.153	0.1474	0.229944	0.0638826	-0.017 to 0.17
Sph(d16:1)		-0.0206346	-0.046 to 0.005	0.116241	0.44544	-0.0201882	-0.043 to 0.003	-0.0493317	-0.134 to 0.035	0.253729	0.337726	-0.0477489	-0.139 to 0.04
Sph(d18:1)		0.0106723	-0.008 to 0.029	0.251318	0.632358	0.0110368	-0.016 to 0.029	0.100362	0.041 to 0.16	0.00098935	0.00263827	0.0994163	0.043 to 0.159
Sph(d18:2)		-0.00105773	-0.027 to 0.025	0.937507	0.980047	-0.00120891	-0.025 to 0.027	-0.0681791	-0.155 to 0.019	0.12556	0.184535	-0.0687784	-0.161 to 0.013
S1P(d16:1)		-0.0115606	-0.032 to 0.009	0.271853	0.647111	-0.0106584	-0.036 to 0.009	-0.122923	-0.191 to -0.055	0.000401107	0.00118349	-0.122033	-0.188 to -0.057
S1P(d18:0)		-0.00468364	-0.024 to 0.015	0.641462	0.849444	-0.00445085	-0.033 to 0.016	-0.118774	-0.182 to -0.055	0.000266169	0.00082619	-0.119507	-0.17 to -0.063
S1P(d18:1)		-0.00249073	-0.022 to 0.017	0.800179	0.921805	-0.00190184	-0.03 to 0.018	-0.0698037	-0.133 to -0.007	0.0308946	0.0566766	-0.0690477	-0.131 to -0.016
S1P(d18:2)		-0.011298	-0.029 to 0.007	0.217471	0.583936	-0.0111171	-0.034 to 0.009	-0.135733	-0.194 to -0.078	5.31299e-06	2.5768e-05	-0.136807	-0.189 to -0.081
Cer(d18:0/16:0)		0.00152431	-0.025 to 0.028	0.909281	0.974317	0.001115	-0.023 to 0.026	0.0799138	-0.006 to 0.166	0.0699875	0.113146	0.0799633	-0.001 to 0.163
Cer(d18:0/18:0)		-0.000626544	-0.026 to 0.025	0.961268	0.983273	-0.000799759	-0.028 to 0.027	0.192112	0.108 to 0.276	8.7559e-06	3.97344e-05	0.193427	0.103 to 0.279
Cer(d18:0/20:0)		-0.0187702	-0.045 to 0.007	0.156255	0.483083	-0.0190488	-0.043 to 0.005	0.0908274	0.004 to 0.177	0.0401556	0.0695552	0.0880089	0.003 to 0.182
Cer(d18:0/22:0)		-0.0035346	-0.029 to 0.022	0.788234	0.920293	-0.00369129	-0.029 to 0.023	0.0812999	-0.006 to 0.169	0.0696638	0.113094	0.0815914	-0.007 to 0.177
Cer(d18:0/24:0)		-0.0122237	-0.038 to 0.014	0.352774	0.709204	-0.0125684	-0.037 to 0.014	-0.0182481	-0.107 to 0.07	0.686289	0.764644	-0.0169255	-0.107 to 0.058
Cer(d18:0/24:1)		-0.00118965	-0.027 to 0.025	0.928393	0.980047	-0.0019717	-0.024 to 0.025	0.0708015	-0.017 to 0.158	0.112835	0.170353	0.0733881	-0.025 to 0.155
Cer(d16:1/16:0)		0.0105977	-0.015 to 0.036	0.417417	0.737848	0.0105707	-0.014 to 0.038	0.0780361	-0.009 to 0.165	0.0795718	0.127053	0.0786402	-0.003 to 0.149
Cer(d16:1/18:0)		0.00541254	-0.02 to 0.031	0.681393	0.875432	0.00539673	-0.02 to 0.032	0.0923377	0.006 to 0.179	0.0368924	0.0647704	0.0927457	0.014 to 0.18
Cer(d16:1/20:0)		0.0029985	-0.023 to 0.029	0.821789	0.927679	0.00290401	-0.027 to 0.029	0.0925977	0.006 to 0.179	0.036487	0.0642039	0.0918681	0.006 to 0.173
Cer(d16:1/22:0)		-0.00344654	-0.029 to 0.022	0.79315	0.921805	-0.00284093	-0.031 to 0.022	0.0562582	-0.031 to 0.143	0.204539	0.282263	0.0560886	-0.035 to 0.14
Cer(d16:1/23:0)		-0.010017	-0.036 to 0.016	0.448481	0.748556	-0.0104297	-0.034 to 0.016	-0.0303121	-0.117 to 0.057	0.49476	0.590668	-0.0281513	-0.116 to 0.045
Cer(d16:1/24:0)		-0.0132359	-0.039 to 0.012	0.310805	0.684345	-0.0136362	-0.041 to 0.012	-0.0762299	-0.164 to 0.011	0.0879367	0.138416	-0.0765117	-0.158 to 0.006
Cer(d16:1/24:1)		-0.00722636	-0.033 to 0.019	0.588726	0.826132	-0.00700787	-0.032 to 0.019	0.103796	0.017 to 0.191	0.0194127	0.0372878	0.107323	0.014 to 0.184
Cer(d17:1/16:0)		0.0132337	-0.012 to 0.038	0.304905	0.684345	0.0138092	-0.011 to 0.035	0.124166	0.038 to 0.211	0.00504491	0.0112173	0.124951	0.044 to 0.209
Cer(d17:1/18:0)		0.019305	-0.007 to 0.045	0.148904	0.472127	0.0195932	-0.01 to 0.046	0.167869	0.082 to 0.253	0.00013258	0.000453225	0.170282	0.077 to 0.248
Cer(d17:1/20:0)		0.0079293	-0.018 to 0.034	0.552758	0.803522	0.00700987	-0.017 to 0.033	0.1253	0.039 to 0.212	0.00466294	0.0105187	0.125202	0.038 to 0.21
Cer(d17:1/22:0)		-0.00699252	-0.033 to 0.019	0.59792	0.828546	-0.00713795	-0.032 to 0.018	0.0865633	0 to 0.173	0.0510143	0.086196	0.0880592	0.003 to 0.172
Cer(d17:1/23:0)		-0.0102514	-0.036 to 0.016	0.436635	0.747528	-0.0104589	-0.032 to 0.017	-0.0140194	-0.101 to 0.073	0.753501	0.816643	-0.016315	-0.095 to 0.074
Cer(d17:1/24:0)		-0.0150294	-0.041 to 0.011	0.259164	0.64004	-0.0160092	-0.039 to 0.011	-0.0408261	-0.129 to 0.047	0.363299	0.458407	-0.0404456	-0.127 to 0.046
Cer(d17:1/24:1)		-0.00249339	-0.028 to 0.023	0.850481	0.944166	-0.0028713	-0.027 to 0.022	0.124859	0.038 to 0.211	0.00484773	0.0108724	0.122992	0.033 to 0.208
Cer(d18:1/14:0)		0.0183893	-0.006 to 0.043	0.136965	0.463077	0.0180996	-0.005 to 0.042	0.0940194	0.013 to 0.175	0.0229156	0.0432665	0.0972948	0.01 to 0.165
Cer(d18:1/16:0)		0.0180941	-0.008 to 0.044	0.171945	0.515189	0.0174386	-0.008 to 0.043	0.241907	0.159 to 0.325	1.92114e-08	2.1048e-07	0.244276	0.154 to 0.319
Cer(d18:1/17:0)		-0.0197078	-0.046 to 0.006	0.138442	0.463077	-0.019357	-0.046 to 0.008	-0.00247081	-0.09 to 0.085	0.955727	0.961925	-0.00220831	-0.092 to 0.086
Cer(d18:1/18:0)		0.0230647	-0.003 to 0.049	0.0844069	0.401314	0.022585	-0.001 to 0.051	0.346304	0.265 to 0.428	8.25345e-16	1.28094e-13	0.342729	0.261 to 0.436
Cer(d18:1/19:0)		0.0130498	-0.013 to 0.039	0.33176	0.696118	0.0131547	-0.015 to 0.042	0.220617	0.136 to 0.306	5.04904e-07	3.69627e-06	0.219185	0.133 to 0.308
Cer(d18:1/20:0)		0.0145068	-0.012 to 0.041	0.281543	0.652171	0.0146248	-0.012 to 0.04	0.358736	0.278 to 0.44	6.2218e-17	1.54335e-14	0.358544	0.284 to 0.446
Cer(d18:1/21:0)		0.00938426	-0.017 to 0.036	0.488921	0.76958	0.0090737	-0.017 to 0.034	0.224792	0.14 to 0.31	3.25497e-07	2.50085e-06	0.223884	0.131 to 0.32
Cer(d18:1/22:0)		0.0107389	-0.016 to 0.037	0.430924	0.747528	0.0104842	-0.017 to 0.037	0.285736	0.202 to 0.37	6.18544e-11	1.45451e-09	0.287426	0.2 to 0.372
Cer(d18:1/23:0)		-0.00159157	-0.028 to 0.025	0.906066	0.973832	-0.00131538	-0.025 to 0.022	0.113714	0.027 to 0.2	0.0104055	0.0216479	0.113004	0.023 to 0.204
Cer(d18:1/24:0)		-0.000693669	-0.028 to 0.027	0.960494	0.983273	-0.000471776	-0.028 to 0.026	0.131489	0.043 to 0.22	0.00360544	0.00835172	0.133162	0.05 to 0.216
Cer(d18:1/24:1)		0.00514395	-0.022 to 0.032	0.70653	0.895861	0.00517188	-0.022 to 0.03	0.293452	0.209 to 0.377	2.1611e-11	5.98934e-10	0.29239	0.207 to 0.391
Cer(d18:1/26:0)		-0.00418291	-0.03 to 0.022	0.753788	0.910634	-0.0036784	-0.028 to 0.019	0.0170453	-0.071 to 0.105	0.703493	0.779873	0.0166234	-0.066 to 0.108
Cer(d18:2/14:0)		0.0124967	-0.014 to 0.039	0.350118	0.709204	0.0130276	-0.012 to 0.042	-0.0954056	-0.183 to -0.008	0.0323637	0.0578669	-0.094064	-0.176 to -0.023
Cer(d18:2/16:0)		0.00490843	-0.021 to 0.031	0.712738	0.896113	0.00481501	-0.021 to 0.032	-0.0246489	-0.111 to 0.061	0.574615	0.664533	-0.0254601	-0.112 to 0.061
Cer(d18:2/17:0)		-0.0271514	-0.053 to -0.001	0.0412847	0.337231	-0.0277172	-0.056 to -0.001	0.00666069	-0.081 to 0.094	0.881475	0.910818	0.00641342	-0.073 to 0.089
Cer(d18:2/18:0)		-0.00684494	-0.033 to 0.019	0.602728	0.83003	-0.00702288	-0.032 to 0.017	0.113835	0.028 to 0.2	0.00986435	0.0206885	0.111366	0.032 to 0.203
Cer(d18:2/20:0)		-0.00174363	-0.028 to 0.025	0.898045	0.970241	-0.00201878	-0.026 to 0.024	0.125478	0.039 to 0.212	0.00450728	0.010227	0.125235	0.038 to 0.216
Cer(d18:2/21:0)		-0.0121924	-0.039 to 0.014	0.370999	0.719227	-0.0118559	-0.037 to 0.014	0.063079	-0.024 to 0.15	0.15709	0.225327	0.0614218	-0.023 to 0.151
Cer(d18:2/22:0)		-0.0144884	-0.041 to 0.012	0.279515	0.649412	-0.0142349	-0.039 to 0.01	0.0890534	0.003 to 0.176	0.0441113	0.0753972	0.0894257	0.004 to 0.166
Cer(d18:2/23:0)		-0.0169904	-0.043 to 0.009	0.198443	0.568234	-0.0169897	-0.04 to 0.008	-0.00482966	-0.091 to 0.082	0.912933	0.934373	-0.0037193	-0.091 to 0.085
Cer(d18:2/24:0)		-0.0155463	-0.042 to 0.011	0.251859	0.632358	-0.0148231	-0.039 to 0.013	0.00127615	-0.086 to 0.089	0.977271	0.979796	0.00327096	-0.083 to 0.085
Cer(d18:2/24:1)		-0.00997206	-0.036 to 0.016	0.455367	0.749218	-0.00972461	-0.037 to 0.016	0.130322	0.045 to 0.216	0.00299873	0.00707299	0.132492	0.043 to 0.206
Cer(d18:2/26:0)		-0.010323	-0.036 to 0.015	0.433333	0.747528	-0.00991821	-0.034 to 0.014	-0.0279601	-0.115 to 0.059	0.53058	0.626682	-0.0268498	-0.123 to 0.061
Cer(d19:1/16:0)		-0.0113218	-0.037 to 0.015	0.394958	0.722173	-0.0105367	-0.034 to 0.011	0.0804709	-0.005 to 0.166	0.0658105	0.10774	0.0791456	-0.002 to 0.164
Cer(d19:1/18:0)		0.00795756	-0.018 to 0.034	0.552436	0.803522	0.00726841	-0.018 to 0.029	0.137884	0.052 to 0.224	0.00176134	0.00439485	0.136762	0.041 to 0.224
Cer(d19:1/20:0)		0.0119163	-0.014 to 0.038	0.372152	0.719227	0.0113286	-0.016 to 0.041	0.109173	0.023 to 0.195	0.0134973	0.0269947	0.109187	0.02 to 0.196
Cer(d19:1/22:0)		0.00080164	-0.025 to 0.027	0.951943	0.983273	0.000859627	-0.023 to 0.024	0.0534744	-0.034 to 0.14	0.228965	0.309541	0.0540116	-0.035 to 0.134
Cer(d19:1/23:0)		-0.00356493	-0.03 to 0.022	0.788653	0.920293	-0.00326304	-0.029 to 0.017	-0.0318974	-0.119 to 0.055	0.472849	0.567322	-0.0333517	-0.124 to 0.055
Cer(d19:1/24:0)		-0.00430323	-0.03 to 0.022	0.745937	0.910634	-0.00356662	-0.029 to 0.018	-0.0410809	-0.129 to 0.046	0.357922	0.454917	-0.0390891	-0.131 to 0.044
Cer(d19:1/24:1)		0.00374297	-0.022 to 0.029	0.775542	0.91185	0.00365207	-0.021 to 0.028	0.0598895	-0.027 to 0.147	0.179077	0.252203	0.060536	-0.022 to 0.152
Cer(d19:1/26:0)		-0.0133636	-0.039 to 0.013	0.314571	0.687625	-0.0123564	-0.041 to 0.012	-0.0508547	-0.138 to 0.036	0.252309	0.336991	-0.0509007	-0.135 to 0.038
Cer(d20:1/22:0)		-0.00988076	-0.036 to 0.016	0.45571	0.749218	-0.0108116	-0.033 to 0.018	0.133028	0.046 to 0.22	0.0027482	0.00652172	0.133327	0.046 to 0.228
Cer(d20:1/23:0)		-0.00599512	-0.033 to 0.021	0.658167	0.859827	-0.00575327	-0.031 to 0.018	0.0402664	-0.047 to 0.127	0.366021	0.460496	0.0411958	-0.05 to 0.124
Cer(d20:1/24:0)		-0.0169571	-0.043 to 0.009	0.199441	0.568994	-0.0170958	-0.045 to 0.008	-0.00485383	-0.093 to 0.083	0.913904	0.934373	-0.00412526	-0.081 to 0.08
Cer(d20:1/24:1)		-0.00256438	-0.028 to 0.023	0.845996	0.943237	-0.00304048	-0.031 to 0.024	0.146893	0.06 to 0.234	0.000949881	0.00255054	0.147354	0.048 to 0.236
Cer(d20:1/26:0)		-0.00618284	-0.033 to 0.02	0.645673	0.849517	-0.00639978	-0.031 to 0.02	0.00625548	-0.082 to 0.094	0.889322	0.916399	0.00511696	-0.077 to 0.091
Cer(m18:0/20:0)		0.00244296	-0.023 to 0.028	0.852931	0.944166	0.00309238	-0.028 to 0.027	0.0638543	-0.022 to 0.15	0.147848	0.214049	0.0643897	-0.025 to 0.159
Cer(m18:0/22:0)		0.0195294	-0.006 to 0.045	0.137269	0.463077	0.020642	-0.007 to 0.043	0.0686635	-0.018 to 0.155	0.120465	0.17874	0.0699542	-0.017 to 0.152
Cer(m18:0/23:0)		0.00681004	-0.019 to 0.032	0.603269	0.83003	0.00650058	-0.016 to 0.03	-0.0224437	-0.11 to 0.065	0.614443	0.697088	-0.0212862	-0.126 to 0.075
Cer(m18:0/24:0)		0.0100752	-0.016 to 0.036	0.452191	0.748556	0.0106739	-0.014 to 0.037	-0.00385288	-0.091 to 0.083	0.931063	0.946926	-0.00308789	-0.1 to 0.082
Cer(m18:0/24:1)		0.0254717	0 to 0.051	0.0547822	0.363319	0.0251068	0 to 0.051	0.128364	0.042 to 0.215	0.00372334	0.00859914	0.129207	0.032 to 0.224
Cer(m18:1/18:0)		-0.00329312	-0.028 to 0.022	0.79639	0.921805	-0.00305227	-0.029 to 0.021	0.0677907	-0.019 to 0.155	0.126232	0.185171	0.0694376	-0.031 to 0.158
Cer(m18:1/20:0)		0.00892583	-0.016 to 0.034	0.491302	0.770396	0.00845353	-0.014 to 0.038	0.0482801	-0.038 to 0.135	0.273954	0.361545	0.0506758	-0.049 to 0.133
Cer(m18:1/22:0)		0.0114844	-0.015 to 0.038	0.388122	0.722173	0.0117092	-0.016 to 0.037	-0.00618477	-0.094 to 0.082	0.890419	0.916399	-0.00518513	-0.096 to 0.081
Cer(m18:1/23:0)		0.00852815	-0.017 to 0.034	0.515695	0.790297	0.0093433	-0.017 to 0.033	-0.0391923	-0.127 to 0.049	0.382266	0.47845	-0.0365066	-0.129 to 0.045
Cer(m18:1/24:0)		0.011601	-0.014 to 0.038	0.382469	0.722173	0.011547	-0.013 to 0.041	-0.0408094	-0.129 to 0.047	0.363042	0.458407	-0.0395166	-0.128 to 0.047
Cer(m18:1/24:1)		0.0252838	-0.001 to 0.051	0.0561122	0.363319	0.0254928	0.001 to 0.05	0.054314	-0.033 to 0.142	0.224536	0.30603	0.0559795	-0.042 to 0.141
Cer1P(d18:1/16:0)		-0.0395335	-0.066 to -0.013	0.0030734	0.125524	-0.0384194	-0.065 to -0.015	-0.253502	-0.337 to -0.17	4.95244e-09	6.62603e-08	-0.252021	-0.346 to -0.176
HexCer(d16:1/18:0)		-0.026183	-0.052 to -0.001	0.0433682	0.343406	-0.0270991	-0.053 to 0.002	-0.155522	-0.242 to -0.069	0.000492938	0.00140632	-0.155859	-0.25 to -0.063
HexCer(d16:1/20:0)		-0.0396932	-0.065 to -0.015	0.00206299	0.107722	-0.041688	-0.067 to -0.013	-0.218013	-0.304 to -0.132	9.8608e-07	6.17095e-06	-0.218347	-0.307 to -0.129
HexCer(d16:1/22:0)		-0.033608	-0.059 to -0.009	0.00876372	0.261756	-0.0353135	-0.06 to -0.008	-0.202197	-0.289 to -0.116	5.85465e-06	2.82187e-05	-0.202246	-0.294 to -0.106
HexCer(d16:1/24:0)		-0.0425224	-0.068 to -0.017	0.001051	0.0899216	-0.0434827	-0.069 to -0.016	-0.208713	-0.295 to -0.123	2.66865e-06	1.44816e-05	-0.208127	-0.3 to -0.114
HexCer(d18:1/16:0)		0.028487	0.002 to 0.055	0.0334776	0.317409	0.0281403	0.003 to 0.056	0.184546	0.098 to 0.271	3.25823e-05	0.00012579	0.18564	0.099 to 0.281
HexCer(d18:1/18:0)		-0.0236121	-0.049 to 0.002	0.0703931	0.381993	-0.0241102	-0.05 to -0.001	-0.0599748	-0.148 to 0.028	0.180305	0.253472	-0.0628116	-0.162 to 0.024
HexCer(d18:1/20:0)		-0.03038	-0.056 to -0.005	0.0192207	0.281362	-0.0311544	-0.055 to -0.009	-0.120365	-0.208 to -0.033	0.00704062	0.0152187	-0.122468	-0.214 to -0.019
HexCer(d18:1/22:0)		-0.015918	-0.042 to 0.01	0.224364	0.594221	-0.0161765	-0.041 to 0.012	-0.0323333	-0.121 to 0.056	0.473012	0.567322	-0.0317234	-0.129 to 0.062
HexCer(d18:1/24:0)		-0.0199623	-0.046 to 0.006	0.126642	0.457088	-0.0198687	-0.046 to 0.005	-0.0285454	-0.116 to 0.059	0.522453	0.618968	-0.0297022	-0.122 to 0.062
HexCer(d18:1/24:1)		0.00798792	-0.018 to 0.034	0.541328	0.800261	0.00801949	-0.016 to 0.034	0.113666	0.027 to 0.2	0.0101269	0.0211819	0.112515	0.027 to 0.211
HexCer(d18:2/18:0)		-0.0456987	-0.071 to -0.02	0.000426368	0.0844757	-0.0465528	-0.068 to -0.025	-0.204219	-0.29 to -0.119	3.5356e-06	1.84136e-05	-0.205352	-0.292 to -0.112
HexCer(d18:2/20:0)		-0.0238572	-0.05 to 0.002	0.0752584	0.394603	-0.0238183	-0.049 to 0.002	-0.0726907	-0.16 to 0.015	0.103231	0.15926	-0.0730651	-0.156 to 0.01
HexCer(d18:2/22:0)		-0.0441245	-0.07 to -0.019	0.000762023	0.0844757	-0.0453899	-0.068 to -0.017	-0.194908	-0.281 to -0.109	1.15945e-05	5.05469e-05	-0.197258	-0.284 to -0.094
HexCer(d18:2/24:0)		-0.0407884	-0.066 to -0.015	0.00177361	0.107722	-0.0420714	-0.067 to -0.015	-0.178372	-0.264 to -0.092	5.50717e-05	0.000203503	-0.179452	-0.273 to -0.07
Hex2Cer(d16:1/16:0)		0.00709707	-0.02 to 0.034	0.602663	0.83003	0.00564385	-0.019 to 0.039	0.184343	0.098 to 0.271	3.70003e-05	0.000140805	0.184033	0.1 to 0.277
Hex2Cer(d16:1/24:1)		0.000402194	-0.026 to 0.027	0.976516	0.987228	-0.000192217	-0.025 to 0.028	-0.0391617	-0.127 to 0.048	0.38083	0.477422	-0.038925	-0.133 to 0.047
Hex2Cer(d18:1/16:0)		0.0367407	0.01 to 0.064	0.00742636	0.261756	0.0363679	0.009 to 0.064	0.345274	0.261 to 0.429	5.09291e-15	6.58683e-13	0.346021	0.252 to 0.438
Hex2Cer(d18:1/18:0)		-0.00444054	-0.031 to 0.022	0.744104	0.910634	-0.00473572	-0.029 to 0.021	-0.143622	-0.231 to -0.056	0.00138739	0.0035829	-0.143719	-0.245 to -0.056
Hex2Cer(d18:1/20:0)		-0.00751222	-0.034 to 0.018	0.571272	0.8146	-0.00730568	-0.029 to 0.016	0.160165	0.076 to 0.244	0.000218897	0.00069903	0.159433	0.071 to 0.251
Hex2Cer(d18:1/22:0)		0.00291717	-0.023 to 0.028	0.822701	0.927679	0.00369428	-0.022 to 0.024	0.188485	0.107 to 0.27	6.90313e-06	3.2864e-05	0.188828	0.108 to 0.273
Hex2Cer(d18:1/24:0)		0.00206448	-0.024 to 0.028	0.877427	0.955132	0.00237131	-0.022 to 0.024	0.0930484	0.008 to 0.178	0.0315005	0.0570443	0.0920693	0.015 to 0.177
Hex2Cer(d18:1/24:1)		0.0335168	0.007 to 0.06	0.0135176	0.275101	0.0328376	0.01 to 0.058	0.237776	0.152 to 0.324	9.63771e-08	8.49871e-07	0.238807	0.15 to 0.321
Hex2Cer(d18:2/16:0)		0.0200716	-0.006 to 0.046	0.135035	0.463077	0.0194952	-0.004 to 0.048	0.265601	0.181 to 0.351	1.87542e-09	2.91065e-08	0.264219	0.186 to 0.363
Hex2Cer(d18:2/24:1)		0.0115063	-0.015 to 0.038	0.394404	0.722173	0.01137	-0.011 to 0.037	-0.00814587	-0.096 to 0.08	0.856456	0.892613	-0.00780993	-0.1 to 0.092
Hex3Cer(d18:1/16:0)		-0.0298412	-0.057 to -0.003	0.0296147	0.317409	-0.0297125	-0.055 to -0.004	-0.207259	-0.294 to -0.12	3.70769e-06	1.91811e-05	-0.207123	-0.298 to -0.113
Hex3Cer(d18:1/18:0)		-0.0449339	-0.071 to -0.019	0.000620024	0.0844757	-0.0455885	-0.07 to -0.022	-0.199666	-0.286 to -0.113	7.3978e-06	3.47921e-05	-0.201045	-0.282 to -0.113
Hex3Cer(d18:1/20:0)		-0.0456237	-0.072 to -0.02	0.000642176	0.0844757	-0.0460309	-0.071 to -0.02	-0.156015	-0.243 to -0.069	0.000489646	0.00140286	-0.155719	-0.244 to -0.065
Hex3Cer(d18:1/22:0)		-0.04494	-0.071 to -0.019	0.000699357	0.0844757	-0.0445584	-0.07 to -0.022	-0.202108	-0.288 to -0.117	4.48871e-06	2.24153e-05	-0.201698	-0.296 to -0.109
Hex3Cer(d18:1/24:0)		-0.0340712	-0.06 to -0.008	0.0099243	0.270068	-0.0346509	-0.06 to -0.008	-0.169907	-0.257 to -0.083	0.000143943	0.000482036	-0.170381	-0.262 to -0.087
Hex3Cer(d18:1/24:1)		-0.0332588	-0.06 to -0.007	0.0141767	0.275101	-0.0334057	-0.054 to -0.007	-0.157508	-0.245 to -0.07	0.00044705	0.00130757	-0.160091	-0.251 to -0.073
GM3(d18:1/16:0)		0.0196218	-0.007 to 0.047	0.153962	0.477897	0.0199422	-0.007 to 0.047	0.240616	0.154 to 0.328	9.27705e-08	8.37092e-07	0.238039	0.147 to 0.35
GM3(d18:1/18:0)		-0.0468975	-0.073 to -0.02	0.000572779	0.0844757	-0.0459339	-0.071 to -0.021	-0.207262	-0.293 to -0.121	3.16407e-06	1.67685e-05	-0.208639	-0.295 to -0.125
GM3(d18:1/20:0)		0.00162888	-0.024 to 0.027	0.900224	0.970241	0.00253322	-0.026 to 0.029	0.122454	0.034 to 0.211	0.00664387	0.0144821	0.121285	0.03 to 0.216
GM3(d18:1/22:0)		-0.00758067	-0.034 to 0.019	0.578229	0.821644	-0.00763932	-0.03 to 0.019	0.094131	0.006 to 0.182	0.0357836	0.0633975	0.0910123	0.007 to 0.188
GM3(d18:1/24:0)		-0.0115179	-0.039 to 0.016	0.40656	0.727276	-0.0106514	-0.038 to 0.016	0.0516692	-0.037 to 0.14	0.253191	0.337587	0.0513932	-0.034 to 0.142
GM3(d18:1/24:1)		-0.00327777	-0.03 to 0.023	0.809284	0.924896	-0.00298805	-0.028 to 0.019	0.0988632	0.011 to 0.187	0.0276139	0.0515106	0.0989991	0.002 to 0.193
GM1(d18:1/16:0)		0.000830991	-0.026 to 0.028	0.951574	0.983273	0.000204763	-0.025 to 0.029	0.0695723	-0.019 to 0.158	0.124973	0.18437	0.0684016	-0.027 to 0.181
Sulfatide (d18:1:/16:0(OH))		-0.0146537	-0.041 to 0.012	0.276546	0.649412	-0.0147204	-0.042 to 0.013	-0.062548	-0.15 to 0.025	0.162662	0.231606	-0.0619837	-0.152 to 0.019
Sulfatide (d18:1:/16:0)		-0.0144139	-0.041 to 0.012	0.284548	0.65522	-0.0138151	-0.044 to 0.012	-0.0964061	-0.184 to -0.009	0.0313127	0.0570443	-0.0978566	-0.182 to -0.011
Sulfatide (d18:1:/24:0(OH))		-0.013141	-0.039 to 0.012	0.311307	0.684345	-0.0129586	-0.036 to 0.009	-0.112214	-0.199 to -0.025	0.0117383	0.0238454	-0.110269	-0.207 to -0.026
Sulfatide (d18:1:/24:0)		-0.0256119	-0.052 to 0.001	0.0591184	0.367007	-0.0254253	-0.05 to 0.003	-0.162302	-0.249 to -0.075	0.00028452	0.000869241	-0.161812	-0.264 to -0.082
Sulfatide (d18:1:/24:1(OH))		-0.0124428	-0.038 to 0.013	0.345135	0.704945	-0.013111	-0.04 to 0.012	-0.114876	-0.201 to -0.029	0.00930772	0.0196272	-0.114051	-0.199 to -0.033
Sulfatide (d18:1:/24:1)		-0.0255458	-0.051 to 0	0.053775	0.359736	-0.0255571	-0.051 to 0.001	-0.163889	-0.251 to -0.077	0.000243726	0.000771964	-0.165505	-0.267 to -0.08
SM(34:3)		-0.0199475	-0.047 to 0.007	0.143065	0.463581	-0.0202101	-0.047 to 0.005	-0.151025	-0.238 to -0.064	0.000733549	0.00201143	-0.148477	-0.244 to -0.071
SM(35:2) (b)		-0.0117266	-0.039 to 0.015	0.392608	0.722173	-0.0111587	-0.033 to 0.014	-0.0323561	-0.121 to 0.056	0.472635	0.567322	-0.0288415	-0.138 to 0.057
SM(37:1)		-0.0204505	-0.047 to 0.006	0.130051	0.458452	-0.0208225	-0.045 to 0.006	-0.0551515	-0.143 to 0.032	0.217876	0.299243	-0.0558877	-0.139 to 0.032
SM(37:2)		-0.0135837	-0.04 to 0.013	0.311233	0.684345	-0.0137253	-0.037 to 0.013	-0.0817091	-0.169 to 0.005	0.0666745	0.108925	-0.0808793	-0.171 to 0.004
SM(38:3) (a)		-0.00866541	-0.035 to 0.018	0.521151	0.790297	-0.00818793	-0.035 to 0.016	-0.000930348	-0.089 to 0.088	0.983566	0.984836	-0.00041726	-0.104 to 0.095
SM(38:3) (b)		0.00637079	-0.02 to 0.033	0.636193	0.843908	0.00619859	-0.02 to 0.034	-0.0579204	-0.145 to 0.029	0.192156	0.268672	-0.0568485	-0.15 to 0.03
SM(40:3) (a)		-0.00251359	-0.029 to 0.024	0.85413	0.944166	-0.00333205	-0.025 to 0.024	0.0278762	-0.06 to 0.116	0.535796	0.630922	0.0243302	-0.064 to 0.126
SM(40:3) (b)		-0.00800594	-0.034 to 0.018	0.547875	0.803522	-0.00859929	-0.033 to 0.019	-0.0142281	-0.102 to 0.073	0.749971	0.813955	-0.0108443	-0.106 to 0.069
SM(41:0)		-0.0122768	-0.038 to 0.013	0.342606	0.704945	-0.0131546	-0.036 to 0.012	-0.0354029	-0.123 to 0.053	0.431104	0.527661	-0.0361605	-0.122 to 0.063
SM(41:1) (a)		-0.00816852	-0.034 to 0.018	0.539194	0.800261	-0.00814301	-0.031 to 0.017	-0.0207163	-0.109 to 0.067	0.644451	0.725826	-0.0182486	-0.115 to 0.071
SM(43:1)		-0.0112816	-0.037 to 0.015	0.396601	0.722173	-0.0116914	-0.033 to 0.013	-0.0275374	-0.115 to 0.06	0.539664	0.634514	-0.0286461	-0.115 to 0.068
SM(43:2) (b)		0.00613144	-0.02 to 0.032	0.645059	0.849517	0.00599971	-0.022 to 0.03	0.127683	0.041 to 0.214	0.00401591	0.00916573	0.128272	0.038 to 0.226
SM(43:2) (c)		-0.00890809	-0.035 to 0.018	0.509304	0.78729	-0.00892724	-0.033 to 0.018	0.00676918	-0.081 to 0.095	0.880345	0.910818	0.00551845	-0.093 to 0.101
SM(44:1)		-0.0181164	-0.044 to 0.008	0.174508	0.518843	-0.0191212	-0.041 to 0.007	-0.0248624	-0.113 to 0.063	0.580111	0.666958	-0.0268455	-0.121 to 0.08
SM(44:2)		-0.00608395	-0.032 to 0.02	0.644079	0.849517	-0.00591264	-0.031 to 0.018	0.0386775	-0.049 to 0.127	0.390059	0.485291	0.0394967	-0.058 to 0.122
SM(44:3)		0.00271636	-0.023 to 0.029	0.839147	0.939651	0.00315166	-0.023 to 0.027	0.0098014	-0.079 to 0.098	0.828101	0.87074	0.00679637	-0.098 to 0.109
SM(d16:1/19:0)		-0.0117841	-0.038 to 0.014	0.373016	0.719227	-0.0113844	-0.038 to 0.014	-0.0564596	-0.143 to 0.03	0.202552	0.28068	-0.0555921	-0.157 to 0.03
SM(d16:1/23:0)/SM(d17:1/22:0)		-0.0197641	-0.046 to 0.006	0.140236	0.463077	-0.0190713	-0.047 to 0.003	-0.0983746	-0.186 to -0.011	0.0278726	0.0518685	-0.0951017	-0.189 to -0.013
SM(d16:1/24:1)		-0.0117694	-0.038 to 0.015	0.387945	0.722173	-0.0119543	-0.035 to 0.015	-0.0084466	-0.097 to 0.08	0.850986	0.891181	-0.00840517	-0.103 to 0.082
SM(d17:1/14:0)		-0.0231798	-0.049 to 0.003	0.0793398	0.394665	-0.0232819	-0.049 to 0.003	-0.139564	-0.226 to -0.053	0.00164331	0.00414028	-0.137884	-0.222 to -0.054
SM(d17:1/16:0)		-0.0224638	-0.048 to 0.003	0.0893076	0.401314	-0.0226726	-0.046 to 0.003	-0.0843887	-0.171 to 0.002	0.0574056	0.0957994	-0.0858245	-0.185 to -0.004
SM(d17:1/24:1)		-0.000952611	-0.027 to 0.025	0.942954	0.980875	-0.00148186	-0.023 to 0.029	0.0585915	-0.029 to 0.146	0.188649	0.264245	0.057042	-0.036 to 0.147
SM(d18:0/14:0)		-0.017	-0.043 to 0.009	0.208505	0.577643	-0.0175309	-0.041 to 0.007	-0.0964991	-0.184 to -0.009	0.0315361	0.0570443	-0.0956453	-0.179 to -0.008
SM(d18:0/16:0)		-0.0069806	-0.032 to 0.018	0.591448	0.828141	-0.00717858	-0.031 to 0.018	0.00164794	-0.087 to 0.09	0.9709	0.974668	0.00325202	-0.092 to 0.094
SM(d18:0/22:0)		-0.00955778	-0.034 to 0.015	0.449933	0.748556	-0.010386	-0.036 to 0.017	-0.00551716	-0.094 to 0.083	0.902476	0.926352	-0.00561025	-0.101 to 0.088
SM(d18:1/14:0/SM(d16:1/16:0)		-0.0232567	-0.049 to 0.003	0.0825083	0.401314	-0.0236409	-0.046 to 0.004	-0.0965762	-0.184 to -0.009	0.0307269	0.0565026	-0.0934208	-0.181 to -0.01
SM(d18:1/16:0)		-0.0104384	-0.038 to 0.017	0.452414	0.748556	-0.0100481	-0.036 to 0.015	0.0140275	-0.074 to 0.103	0.756161	0.817916	0.0166137	-0.084 to 0.095
SM(d18:1/17:0)/SM(d17:1/18:0)		-0.0191062	-0.045 to 0.007	0.149061	0.472127	-0.0183903	-0.043 to 0.005	-0.0165152	-0.104 to 0.071	0.71275	0.789007	-0.0169343	-0.11 to 0.076
SM(d18:1/18:0/SM(d16:1/20:0)		-0.0247044	-0.051 to 0.001	0.0632375	0.38107	-0.0243412	-0.05 to 0	0.00332328	-0.084 to 0.091	0.940803	0.951842	0.0062949	-0.096 to 0.086
SM(d18:1/20:0)/SM(d16:1/22:0)		-0.0227001	-0.049 to 0.004	0.0920232	0.401314	-0.0234975	-0.045 to 0.002	-0.0646266	-0.153 to 0.023	0.150177	0.216612	-0.0655438	-0.149 to 0.02
SM(d18:1/22:0)/SM(d16:1/24:0)		-0.01172	-0.038 to 0.015	0.385597	0.722173	-0.0110808	-0.037 to 0.013	0.0756458	-0.013 to 0.164	0.0945858	0.147683	0.0746165	-0.017 to 0.162
SM(d18:1/23:0)/SM(d17:1/24:0)		-0.0101756	-0.037 to 0.017	0.455084	0.749218	-0.00987286	-0.036 to 0.015	0.0275007	-0.061 to 0.116	0.541335	0.635516	0.02942	-0.069 to 0.117
SM(d18:1/24:0)		-0.00245687	-0.028 to 0.023	0.852274	0.944166	-0.00305881	-0.029 to 0.027	0.0469857	-0.042 to 0.136	0.299157	0.392802	0.0497176	-0.05 to 0.134
SM(d18:1/24:1)		0.00746369	-0.019 to 0.034	0.579175	0.821644	0.00661303	-0.017 to 0.034	0.19411	0.108 to 0.28	1.25701e-05	5.44937e-05	0.192135	0.108 to 0.284
SM(d18:2/14:0)		-0.0235887	-0.05 to 0.003	0.0788223	0.394665	-0.0239596	-0.045 to 0.001	-0.220429	-0.306 to -0.135	5.38264e-07	3.90367e-06	-0.222524	-0.309 to -0.135
SM(d18:2/16:0)		-0.0320154	-0.058 to -0.006	0.0169804	0.281362	-0.0316428	-0.055 to -0.005	-0.150242	-0.236 to -0.065	0.000621205	0.0017278	-0.1534	-0.226 to -0.066
SM(d18:2/17:0)		-0.0204714	-0.046 to 0.005	0.120698	0.448142	-0.020708	-0.046 to 0.006	-0.103053	-0.189 to -0.017	0.0196296	0.0376113	-0.106099	-0.19 to -0.007
SM(d18:2/18:0)		-0.0294795	-0.055 to -0.004	0.0247736	0.308568	-0.030415	-0.054 to -0.002	-0.0899193	-0.177 to -0.003	0.04371	0.075042	-0.0903118	-0.177 to 0.005
SM(d18:2/18:1)		-0.0239435	-0.05 to 0.002	0.0759537	0.394603	-0.0238666	-0.049 to 0.003	-0.0832312	-0.17 to 0.004	0.0614531	0.101463	-0.0822317	-0.17 to 0.004
SM(d18:2/20:0)		-0.022224	-0.049 to 0.005	0.104764	0.421229	-0.0213684	-0.046 to 0.004	-0.0928704	-0.181 to -0.005	0.0388142	0.0675782	-0.0915246	-0.192 to -0.008
SM(d18:2/22:0)		-0.02002	-0.047 to 0.007	0.140977	0.463552	-0.0193508	-0.044 to 0.006	-0.026064	-0.114 to 0.062	0.561005	0.653664	-0.0254285	-0.12 to 0.063
SM(d18:2/23:0)		-0.0206032	-0.047 to 0.006	0.127619	0.458452	-0.0197329	-0.044 to 0.004	-0.0773563	-0.164 to 0.01	0.0821382	0.130613	-0.0767651	-0.164 to 0.013
SM(d18:2/24:0)		-0.0237324	-0.05 to 0.003	0.0791807	0.394665	-0.023855	-0.048 to 0.004	-0.0778903	-0.166 to 0.01	0.084266	0.13345	-0.078792	-0.17 to 0.012
SM(d19:1/24:1)		0.00402005	-0.022 to 0.03	0.760607	0.91185	0.00387943	-0.018 to 0.031	0.0368926	-0.05 to 0.124	0.407221	0.504253	0.038055	-0.049 to 0.127
PA(34:1)		-0.0145259	-0.032 to 0.003	0.0975451	0.404786	-0.0139781	-0.033 to 0.002	-0.0710632	-0.127 to -0.015	0.0136133	0.0270178	-0.0708497	-0.15 to -0.004
PA(36:1)		-0.0108746	-0.031 to 0.01	0.300836	0.682599	-0.0107202	-0.033 to 0.008	-0.0688739	-0.138 to 0	0.049908	0.0847453	-0.0675067	-0.158 to 0.006
PA(36:2)		-0.00197096	-0.018 to 0.014	0.81323	0.925914	-0.00149016	-0.023 to 0.012	-0.0503933	-0.105 to 0.005	0.0729807	0.117228	-0.0496452	-0.121 to 0.006
PA(36:3)		-0.00134237	-0.017 to 0.014	0.864556	0.948933	-0.0017193	-0.018 to 0.015	-0.0608787	-0.112 to -0.01	0.0192861	0.0371366	-0.0603612	-0.12 to -0.003
PA(36:4)		-0.00718416	-0.025 to 0.011	0.436767	0.747528	-0.00696454	-0.026 to 0.01	-0.0394595	-0.1 to 0.021	0.203631	0.281671	-0.0372466	-0.122 to 0.031
PA(40:6)		-0.0159731	-0.04 to 0.008	0.186176	0.54518	-0.0155004	-0.036 to 0.005	-0.00637668	-0.084 to 0.071	0.872253	0.903696	-0.00580892	-0.095 to 0.074
PC(14:0_16:0)		-0.0168253	-0.043 to 0.009	0.210084	0.577643	-0.0169668	-0.04 to 0.008	-0.082654	-0.17 to 0.005	0.0649865	0.106616	-0.081514	-0.174 to 0.004
PC(14:0_20:4)		-0.00722237	-0.033 to 0.019	0.585831	0.826132	-0.00717887	-0.032 to 0.019	-0.0706415	-0.158 to 0.017	0.113642	0.171235	-0.0716966	-0.167 to 0.027
PC(14:0_22:6)		-0.0203814	-0.046 to 0.006	0.123816	0.455361	-0.0203825	-0.042 to 0.004	-0.0688333	-0.156 to 0.018	0.122504	0.181072	-0.0665989	-0.165 to 0.019
PC(15-MHDA_18:1)		0.00545961	-0.02 to 0.031	0.673226	0.869545	0.00521233	-0.02 to 0.029	-0.0425106	-0.13 to 0.045	0.33903	0.434855	-0.0394509	-0.134 to 0.043
PC(15-MHDA_18:2)		0.00435427	-0.021 to 0.029	0.73436	0.903881	0.00347622	-0.018 to 0.028	-0.0408919	-0.128 to 0.046	0.358189	0.454917	-0.0421969	-0.132 to 0.045
PC(15-MHDA_20:4)		0.0082235	-0.017 to 0.033	0.521155	0.790297	0.0081155	-0.014 to 0.033	-0.0360643	-0.123 to 0.05	0.414001	0.511569	-0.0361397	-0.127 to 0.051
PC(15-MHDA_22:6)		-0.00820951	-0.033 to 0.017	0.524557	0.790297	-0.00820225	-0.032 to 0.015	-0.0925916	-0.179 to -0.006	0.035952	0.0635506	-0.0917723	-0.177 to -0.002
PC(15:0_20:3)		0.0145598	-0.011 to 0.04	0.265635	0.64004	0.0154993	-0.011 to 0.038	-0.000708682	-0.088 to 0.086	0.98727	0.98727	-0.000101168	-0.103 to 0.087
PC(15:0_20:4)		-0.00377342	-0.029 to 0.021	0.767403	0.91185	-0.00334055	-0.03 to 0.019	-0.0741861	-0.16 to 0.012	0.0921699	0.144493	-0.0736918	-0.16 to 0.019
PC(15:0_22:6)		-0.0201287	-0.045 to 0.005	0.117354	0.446407	-0.0201041	-0.045 to 0.002	-0.0921377	-0.178 to -0.006	0.0364236	0.0642039	-0.0895535	-0.186 to -0.003
PC(16:0_16:0)		-0.00814863	-0.035 to 0.018	0.546913	0.803522	-0.00806316	-0.035 to 0.017	-0.0247222	-0.112 to 0.063	0.58015	0.666958	-0.0277928	-0.12 to 0.083
PC(16:0_18:0)		-0.0125114	-0.038 to 0.013	0.338414	0.704945	-0.0121391	-0.037 to 0.011	0.0720246	-0.014 to 0.158	0.100319	0.155694	0.0720973	-0.023 to 0.172
PC(16:0_18:1)		-0.00419454	-0.03 to 0.022	0.749452	0.910634	-0.00474655	-0.031 to 0.02	-0.0243737	-0.11 to 0.062	0.578265	0.666766	-0.0257601	-0.131 to 0.075
PC(16:0_18:2)		0.00156244	-0.026 to 0.029	0.910283	0.974317	0.00141252	-0.026 to 0.031	0.0149042	-0.073 to 0.103	0.740188	0.807857	0.0185712	-0.089 to 0.102
PC(16:0_18:3) (a)		-0.00134622	-0.028 to 0.025	0.919732	0.976742	-0.001292	-0.026 to 0.024	-0.0419796	-0.129 to 0.045	0.343159	0.439424	-0.0401823	-0.14 to 0.041
PC(16:0_18:3) (b)		0.0186472	-0.006 to 0.044	0.143466	0.463581	0.0182545	-0.004 to 0.044	0.060692	-0.022 to 0.144	0.152946	0.220197	0.0600696	-0.031 to 0.149
PC(16:0_20:3) (a)		0.0208125	-0.005 to 0.047	0.119758	0.448142	0.0203614	-0.005 to 0.047	0.0728987	-0.014 to 0.16	0.102085	0.158119	0.0741283	-0.02 to 0.162
PC(16:0_20:3) (b)		0.0277389	0.002 to 0.053	0.0346104	0.317409	0.0281576	0 to 0.053	0.115119	0.028 to 0.202	0.00949019	0.0199577	0.119433	0.004 to 0.207
PC(16:0_20:4)		0.00467558	-0.021 to 0.03	0.721592	0.90025	0.00401863	-0.024 to 0.03	-0.00309526	-0.091 to 0.085	0.945237	0.954784	-0.00123011	-0.108 to 0.095
PC(16:0_20:5)		-0.00753559	-0.033 to 0.018	0.560827	0.811835	-0.00851894	-0.035 to 0.019	-0.0411837	-0.128 to 0.046	0.353196	0.451533	-0.040582	-0.135 to 0.051
PC(16:0_22:6)		-0.0203229	-0.046 to 0.005	0.118175	0.447335	-0.0200292	-0.044 to 0.002	-0.070386	-0.157 to 0.016	0.110147	0.168256	-0.0696938	-0.159 to 0.014
PC(16:1_18:2)		-0.00976117	-0.037 to 0.017	0.475218	0.763497	-0.00939638	-0.035 to 0.015	-0.112561	-0.2 to -0.025	0.0117247	0.0238454	-0.110721	-0.199 to -0.03
PC(16:1_20:4)		-0.000435108	-0.026 to 0.026	0.973866	0.987228	-0.000783166	-0.025 to 0.024	-0.0841026	-0.171 to 0.003	0.0597326	0.0990439	-0.0864126	-0.168 to 0.015
PC(16:1_22:6)		-0.0158747	-0.042 to 0.01	0.227222	0.599742	-0.0159876	-0.041 to 0.008	-0.11752	-0.204 to -0.031	0.00783859	0.0166735	-0.114764	-0.215 to -0.037
PC(17:0_18:1)		0.00363906	-0.022 to 0.029	0.779742	0.915401	0.00365075	-0.019 to 0.026	-0.0282806	-0.115 to 0.059	0.524509	0.620456	-0.028378	-0.128 to 0.06
PC(17:0_18:2)		-0.00443537	-0.029 to 0.02	0.724865	0.902882	-0.00437219	-0.029 to 0.02	-0.0320444	-0.119 to 0.055	0.471464	0.567322	-0.0304358	-0.123 to 0.056
PC(17:0_20:4)		0.00353497	-0.022 to 0.029	0.782159	0.916851	0.00383566	-0.023 to 0.026	-0.0263476	-0.112 to 0.06	0.549123	0.642714	-0.0268342	-0.111 to 0.072
PC(17:0_22:6)		-0.0150494	-0.04 to 0.01	0.241462	0.617481	-0.0156475	-0.04 to 0.008	-0.0476741	-0.133 to 0.038	0.276384	0.364132	-0.0467856	-0.13 to 0.038
PC(17:1_18:2)		0.00492088	-0.021 to 0.031	0.713472	0.896113	0.00557712	-0.018 to 0.029	-0.0741598	-0.162 to 0.014	0.0980135	0.152422	-0.0720248	-0.164 to 0.016
PC(18:0_18:1)		0.000495198	-0.025 to 0.026	0.970041	0.987228	0.000490231	-0.024 to 0.026	0.0222932	-0.065 to 0.109	0.616256	0.698123	0.0220763	-0.082 to 0.121
PC(18:0_18:2)		0.00139086	-0.026 to 0.029	0.920062	0.976742	0.00123053	-0.025 to 0.027	0.0614168	-0.025 to 0.148	0.164889	0.23392	0.0639991	-0.039 to 0.139
PC(18:0_20:3)		0.034943	0.009 to 0.061	0.00877016	0.261756	0.0342566	0.013 to 0.06	0.13734	0.051 to 0.224	0.00190806	0.00473052	0.137145	0.03 to 0.225
PC(18:0_20:4)		0.00155488	-0.024 to 0.027	0.904916	0.973832	0.000884743	-0.021 to 0.028	0.0178177	-0.069 to 0.104	0.6868	0.764644	0.017173	-0.065 to 0.11
PC(18:0_22:4)		0.0224422	-0.004 to 0.049	0.0944846	0.401314	0.0224745	-0.001 to 0.05	0.110455	0.023 to 0.198	0.0135448	0.0270018	0.111347	0.016 to 0.202
PC(18:0_22:5) (n3)		-0.00640634	-0.032 to 0.02	0.628411	0.84009	-0.00682898	-0.033 to 0.021	0.0064943	-0.08 to 0.093	0.882822	0.910997	0.00671832	-0.09 to 0.098
PC(18:0_22:5) (n6)		0.0131349	-0.013 to 0.039	0.321392	0.689713	0.0130666	-0.01 to 0.038	0.0443046	-0.043 to 0.132	0.320764	0.41764	0.0442681	-0.061 to 0.137
PC(18:0_22:6)		-0.0121	-0.037 to 0.013	0.34579	0.704945	-0.0124566	-0.037 to 0.014	0.0349759	-0.051 to 0.121	0.425915	0.523788	0.0351322	-0.05 to 0.115
PC(18:1_18:1)		0.0100341	-0.017 to 0.037	0.468236	0.760149	0.010821	-0.017 to 0.036	-0.0118415	-0.1 to 0.076	0.791633	0.846341	-0.00742668	-0.114 to 0.08
PC(18:1_18:2)		-0.00854674	-0.036 to 0.019	0.542445	0.800261	-0.00799524	-0.035 to 0.02	-0.057203	-0.146 to 0.031	0.20533	0.282511	-0.0562426	-0.146 to 0.036
PC(18:1_20:3)		0.0282711	0.002 to 0.055	0.0357861	0.317409	0.0283584	0.001 to 0.051	0.0136132	-0.074 to 0.101	0.759595	0.819813	0.0142983	-0.084 to 0.108
PC(18:1_22:6) (a)		-0.000900081	-0.027 to 0.025	0.946649	0.982085	-0.000103335	-0.027 to 0.022	-0.0359092	-0.123 to 0.051	0.420434	0.517868	-0.034721	-0.128 to 0.045
PC(18:1_22:6) (b)		0.00372304	-0.022 to 0.029	0.775149	0.91185	0.00429929	-0.022 to 0.028	0.00802564	-0.079 to 0.095	0.856332	0.892613	0.0118113	-0.095 to 0.089
PC(18:2_18:2)		-0.00558745	-0.033 to 0.022	0.687384	0.879936	-0.00556635	-0.031 to 0.022	-0.026085	-0.115 to 0.063	0.564144	0.656336	-0.0248132	-0.109 to 0.057
PC(18:2_20:5)		-0.0144302	-0.04 to 0.012	0.278043	0.649412	-0.0144623	-0.04 to 0.009	-0.0897797	-0.177 to -0.003	0.0435551	0.0749418	-0.0858221	-0.181 to -0.001
PC(20:0_20:4)		0.00326181	-0.023 to 0.03	0.809142	0.924896	0.00341847	-0.023 to 0.029	-0.00479037	-0.093 to 0.084	0.915399	0.934671	-0.00536445	-0.09 to 0.078
PC(28:0)		-0.011742	-0.038 to 0.014	0.372375	0.719227	-0.0114396	-0.036 to 0.016	-0.0575496	-0.145 to 0.03	0.197727	0.275904	-0.0550631	-0.152 to 0.032
PC(31:0) (a)		0.000730558	-0.025 to 0.026	0.955182	0.983273	0.000181076	-0.02 to 0.026	-0.0351333	-0.122 to 0.052	0.429994	0.527661	-0.0333774	-0.124 to 0.054
PC(31:0) (b)		0.000625422	-0.025 to 0.026	0.961733	0.983273	2.60118e-05	-0.026 to 0.025	-0.0539615	-0.141 to 0.033	0.224854	0.30603	-0.0558821	-0.145 to 0.035
PC(32:1)		-0.00191963	-0.026 to 0.022	0.877589	0.955132	-0.00240601	-0.027 to 0.022	-0.0469276	-0.13 to 0.036	0.270112	0.357081	-0.0481958	-0.141 to 0.052
PC(32:2)		-0.016541	-0.043 to 0.01	0.216434	0.583169	-0.0163014	-0.042 to 0.008	-0.0912263	-0.178 to -0.005	0.03884	0.0675782	-0.0930194	-0.188 to -0.007
PC(33:0) (a)		0.00451482	-0.021 to 0.03	0.728127	0.903881	0.00416601	-0.018 to 0.03	-0.0491706	-0.136 to 0.038	0.269656	0.357081	-0.0494964	-0.139 to 0.039
PC(33:0) (b)		0.00140264	-0.024 to 0.027	0.914904	0.976568	0.00134242	-0.022 to 0.027	-0.0243409	-0.112 to 0.063	0.584645	0.669152	-0.024656	-0.122 to 0.066
PC(33:1)		0.00123922	-0.024 to 0.026	0.923057	0.977206	0.00112178	-0.023 to 0.024	-0.0401836	-0.126 to 0.046	0.360201	0.456251	-0.0405163	-0.137 to 0.05
PC(33:2)		-0.00682684	-0.033 to 0.019	0.608682	0.835813	-0.00613861	-0.032 to 0.016	-0.0691189	-0.155 to 0.017	0.117083	0.174724	-0.0686823	-0.163 to 0.02
PC(34:5)		-0.00569446	-0.032 to 0.02	0.668196	0.866263	-0.00654465	-0.032 to 0.02	-0.0543085	-0.142 to 0.034	0.227214	0.308248	-0.0526761	-0.147 to 0.033
PC(35:5)		-0.00485259	-0.03 to 0.021	0.709016	0.896113	-0.00569359	-0.032 to 0.02	-0.0522167	-0.139 to 0.035	0.240981	0.322973	-0.051403	-0.143 to 0.047
PC(36:6) (a)		-0.00249008	-0.028 to 0.023	0.849904	0.944166	-0.00184453	-0.028 to 0.021	-0.0697394	-0.157 to 0.018	0.118494	0.17649	-0.0666326	-0.163 to 0.022
PC(38:2)		0.0137117	-0.013 to 0.041	0.323161	0.690835	0.0132758	-0.016 to 0.036	0.103512	0.016 to 0.191	0.0204627	0.039111	0.103539	0.007 to 0.196
PC(38:4) (b)		0.0238614	-0.002 to 0.05	0.0687497	0.38107	0.0237167	-0.001 to 0.048	0.0425667	-0.044 to 0.129	0.337442	0.433535	0.0431382	-0.058 to 0.136
PC(38:5) (a)		-0.00476822	-0.03 to 0.021	0.714812	0.896113	-0.005266	-0.031 to 0.024	-0.119318	-0.205 to -0.034	0.00657616	0.0143749	-0.117251	-0.213 to -0.026
PC(38:5) (b)		-5.45311e-05	-0.026 to 0.026	0.99667	0.99667	-0.000543224	-0.025 to 0.024	-0.0207312	-0.108 to 0.066	0.640417	0.722331	-0.0196688	-0.113 to 0.08
PC(38:6) (a)		-0.0127976	-0.039 to 0.014	0.343112	0.704945	-0.0132044	-0.035 to 0.014	-0.100994	-0.188 to -0.014	0.0236244	0.0444965	-0.0988544	-0.196 to -0.023
PC(38:7)(c)		-0.0297344	-0.055 to -0.004	0.0236596	0.300982	-0.0307937	-0.053 to -0.004	-0.128889	-0.215 to -0.043	0.00347979	0.00808477	-0.127404	-0.212 to -0.042
PC(39:5)(a)		-0.0134202	-0.039 to 0.012	0.299129	0.680715	-0.0135795	-0.04 to 0.013	-0.110564	-0.197 to -0.024	0.0123539	0.0250303	-0.107901	-0.208 to -0.034
PC(39:5)(b)		-0.0038632	-0.029 to 0.022	0.767115	0.91185	-0.00389364	-0.031 to 0.02	-0.0943937	-0.181 to -0.008	0.032281	0.0578523	-0.0938264	-0.18 to -0.009
PC(40:10)		0.00359196	-0.019 to 0.026	0.753293	0.910634	0.00425108	-0.017 to 0.024	0.0294535	-0.045 to 0.104	0.439017	0.535656	0.0312218	-0.058 to 0.108
PC(40:7) (a)		-0.00417271	-0.03 to 0.022	0.754173	0.910634	-0.00409313	-0.027 to 0.022	-0.121067	-0.208 to -0.035	0.00629155	0.0137916	-0.119492	-0.209 to -0.032
PC(40:8)		-0.0223459	-0.048 to 0.003	0.0869635	0.401314	-0.0226722	-0.046 to 0.003	-0.123616	-0.209 to -0.039	0.00453295	0.0102553	-0.12462	-0.201 to -0.028
PC(44:12)		-0.0305954	-0.055 to -0.006	0.0153238	0.281362	-0.0309178	-0.056 to -0.011	-0.145807	-0.23 to -0.062	0.000702874	0.00193415	-0.143612	-0.214 to -0.061
PC(O-16:0/16:0)		0.00683369	-0.02 to 0.034	0.617787	0.83931	0.00685428	-0.02 to 0.032	-0.0154089	-0.103 to 0.073	0.731462	0.803987	-0.0150337	-0.131 to 0.078
PC(O-16:0/20:3)		0.0165026	-0.009 to 0.042	0.212967	0.577792	0.0166199	-0.011 to 0.044	-0.0199695	-0.108 to 0.068	0.655667	0.737189	-0.0183609	-0.12 to 0.069
PC(O-16:0/20:4)		-0.00747002	-0.034 to 0.019	0.581324	0.823189	-0.00775448	-0.034 to 0.02	-0.0343708	-0.123 to 0.054	0.446363	0.543764	-0.0346242	-0.119 to 0.065
PC(O-16:0/22:6)		-0.00669887	-0.032 to 0.018	0.597106	0.828546	-0.00686054	-0.03 to 0.016	0.00357853	-0.082 to 0.089	0.934734	0.948175	0.00621507	-0.081 to 0.09
PC(O-18:0/18:1)		-0.00305021	-0.029 to 0.023	0.816027	0.927141	-0.00263689	-0.031 to 0.022	-0.0671763	-0.153 to 0.019	0.12556	0.184535	-0.0676693	-0.145 to 0.025
PC(O-18:0/18:2)		-0.000296791	-0.027 to 0.026	0.982406	0.990718	-0.000974958	-0.026 to 0.025	-0.0972431	-0.184 to -0.01	0.0293506	0.0542287	-0.0985643	-0.18 to -0.008
PC(O-18:0/20:4)		-0.00102935	-0.027 to 0.025	0.937958	0.980047	-0.000365409	-0.027 to 0.026	-0.00779082	-0.095 to 0.079	0.860641	0.895251	-0.00629841	-0.112 to 0.078
PC(O-18:0/22:6)		-0.00827344	-0.033 to 0.017	0.516145	0.790297	-0.00860509	-0.032 to 0.017	-0.00922105	-0.095 to 0.077	0.83357	0.875305	-0.0083562	-0.093 to 0.078
PC(O-18:1/18:1)		0.000848126	-0.026 to 0.028	0.951197	0.983273	0.000139537	-0.023 to 0.029	-0.140708	-0.228 to -0.054	0.00159683	0.00404947	-0.140538	-0.236 to -0.047
PC(O-18:1/18:2)		0.00555637	-0.021 to 0.032	0.684103	0.877462	0.00641143	-0.023 to 0.031	-0.115411	-0.204 to -0.027	0.0105838	0.0219599	-0.113059	-0.202 to -0.027
PC(O-32:1)		-0.00291171	-0.028 to 0.022	0.818416	0.927679	-0.00281994	-0.029 to 0.022	-0.173204	-0.259 to -0.088	8.38732e-05	0.000295534	-0.171576	-0.261 to -0.089
PC(O-32:2)		-0.00414336	-0.03 to 0.022	0.754559	0.910634	-0.00362085	-0.029 to 0.022	-0.167972	-0.254 to -0.081	0.000157893	0.00052586	-0.168078	-0.258 to -0.08
PC(O-34:1)		0.00871512	-0.016 to 0.033	0.483932	0.765859	0.00883699	-0.014 to 0.037	-0.0950261	-0.181 to -0.009	0.0316224	0.0570674	-0.0953493	-0.189 to 0.007
PC(O-34:2)		0.00276247	-0.023 to 0.029	0.83629	0.938315	0.00278559	-0.021 to 0.03	-0.111687	-0.2 to -0.023	0.0135705	0.0270018	-0.110794	-0.192 to -0.022
PC(O-34:4)		0.00241501	-0.024 to 0.029	0.856426	0.945093	0.00254748	-0.028 to 0.031	-0.132052	-0.219 to -0.045	0.00320374	0.00753365	-0.130195	-0.213 to -0.049
PC(O-35:4)		0.0080803	-0.017 to 0.033	0.529025	0.790989	0.00771301	-0.015 to 0.033	-0.106463	-0.192 to -0.021	0.0150636	0.0294442	-0.105023	-0.203 to -0.021
PC(O-36:0)		0.00900382	-0.017 to 0.035	0.496876	0.774286	0.00856305	-0.018 to 0.032	0.0201169	-0.064 to 0.104	0.637756	0.720376	0.0210789	-0.072 to 0.106
PC(O-36:5)		0.000371972	-0.025 to 0.026	0.97705	0.987228	0.000525892	-0.029 to 0.029	-0.0969563	-0.183 to -0.01	0.0284482	0.052813	-0.0953007	-0.184 to -0.008
PC(O-38:5)		0.0108558	-0.016 to 0.037	0.423367	0.743287	0.0108229	-0.015 to 0.037	0.0110931	-0.076 to 0.098	0.803098	0.854875	0.0122091	-0.073 to 0.105
PC(O-40:5)		0.0234615	-0.002 to 0.049	0.0735903	0.391137	0.0231209	0 to 0.052	0.0681695	-0.018 to 0.154	0.121885	0.180501	0.0679405	-0.03 to 0.166
PC(O-40:7) (a)		0.00305021	-0.022 to 0.028	0.813754	0.925914	0.00343261	-0.02 to 0.026	0.0272829	-0.058 to 0.113	0.531419	0.626719	0.0304415	-0.06 to 0.122
PC(O-40:7) (b)		0.00974198	-0.015 to 0.035	0.446964	0.748556	0.0101656	-0.018 to 0.036	-0.00571723	-0.093 to 0.082	0.898096	0.923076	-0.00344954	-0.108 to 0.079
PC(P-15:0/20:4) (a)		0.0278002	0.002 to 0.054	0.0346324	0.317409	0.0273938	0.003 to 0.05	-0.0909601	-0.177 to -0.005	0.0378213	0.0661022	-0.0904805	-0.168 to -0.006
PC(P-15:0/20:4) (b)		0.0102329	-0.015 to 0.035	0.427542	0.747235	0.0104219	-0.015 to 0.034	-0.17636	-0.261 to -0.092	4.78439e-05	0.000179357	-0.171674	-0.274 to -0.1
PC(P-16:0/14:0)		-0.0305781	-0.056 to -0.005	0.0208465	0.285648	-0.0311185	-0.057 to -0.005	-0.288026	-0.372 to -0.204	4.96822e-11	1.23189e-09	-0.287243	-0.369 to -0.204
PC(P-16:0/16:0)		-0.0169186	-0.044 to 0.01	0.213387	0.577792	-0.0162027	-0.041 to 0.011	-0.279513	-0.364 to -0.195	1.93043e-10	3.74504e-09	-0.282747	-0.357 to -0.182
PC(P-16:0/16:1)		-0.0224051	-0.048 to 0.004	0.0926394	0.401314	-0.0223033	-0.048 to 0.003	-0.317723	-0.399 to -0.236	1.17507e-13	1.01317e-11	-0.319926	-0.396 to -0.234
PC(P-16:0/18:0)		-0.0255736	-0.052 to 0.001	0.0564557	0.363319	-0.025807	-0.052 to 0	-0.144396	-0.231 to -0.058	0.00115376	0.0030453	-0.143419	-0.234 to -0.054
PC(P-16:0/18:1)		-0.035185	-0.061 to -0.009	0.00870222	0.261756	-0.0349697	-0.06 to -0.01	-0.302334	-0.386 to -0.219	4.45606e-12	1.72895e-10	-0.301938	-0.385 to -0.216
PC(P-16:0/18:2)		-0.0240938	-0.051 to 0.003	0.0784695	0.394665	-0.0241279	-0.05 to 0.003	-0.282157	-0.367 to -0.197	1.58801e-10	3.15973e-09	-0.27895	-0.379 to -0.199
PC(P-16:0/18:3)		0.00521472	-0.021 to 0.032	0.69897	0.889181	0.00480656	-0.02 to 0.032	-0.232253	-0.317 to -0.147	1.29564e-07	1.08109e-06	-0.231328	-0.318 to -0.148
PC(P-16:0/20:4)		-0.0225167	-0.049 to 0.004	0.0918366	0.401314	-0.0221029	-0.048 to 0.005	-0.239038	-0.324 to -0.154	5.16986e-08	4.95286e-07	-0.235456	-0.327 to -0.159
PC(P-16:0/20:5)		-0.01448	-0.04 to 0.011	0.261075	0.64004	-0.0151867	-0.041 to 0.012	-0.200431	-0.285 to -0.116	4.24837e-06	2.14074e-05	-0.199369	-0.293 to -0.119
PC(P-16:0/22:6)		-0.0261237	-0.051 to -0.001	0.0417285	0.337305	-0.0265179	-0.049 to -0.001	-0.206545	-0.291 to -0.123	1.91048e-06	1.08414e-05	-0.205206	-0.298 to -0.126
PC(P-17:0/20:4) (a)		-0.0171429	-0.042 to 0.007	0.172139	0.515189	-0.0177599	-0.043 to 0.009	-0.190731	-0.273 to -0.108	7.69517e-06	3.55623e-05	-0.188596	-0.278 to -0.104
PC(P-17:0/20:4) (b)		-0.0215245	-0.047 to 0.004	0.0925042	0.401314	-0.0218712	-0.046 to 0.003	-0.185329	-0.269 to -0.102	1.57528e-05	6.53701e-05	-0.184018	-0.275 to -0.098
PC(P-18:0/18:2)		-0.0222393	-0.048 to 0.004	0.0915721	0.401314	-0.0226146	-0.05 to 0.002	-0.217737	-0.303 to -0.132	8.02133e-07	5.366e-06	-0.214388	-0.314 to -0.14
PC(P-18:0/20:4)		-0.0218381	-0.047 to 0.003	0.0865869	0.401314	-0.0226999	-0.046 to 0.003	-0.154015	-0.239 to -0.069	0.000421144	0.00123791	-0.152782	-0.24 to -0.068
PC(P-18:0/22:5)		-0.0113185	-0.036 to 0.014	0.372863	0.719227	-0.0117362	-0.035 to 0.01	-0.0852449	-0.17 to 0	0.0501907	0.0850393	-0.0826397	-0.189 to -0.001
PC(P-18:0/22:6)		-0.0236899	-0.048 to 0.001	0.058068	0.363393	-0.0246994	-0.047 to -0.001	-0.0925324	-0.177 to -0.008	0.0321499	0.0577508	-0.0932698	-0.186 to -0.008
PC(P-18:1/18:1)		-0.00746579	-0.033 to 0.018	0.572109	0.8146	-0.00852874	-0.035 to 0.018	-0.210889	-0.296 to -0.126	1.71181e-06	9.83971e-06	-0.20846	-0.305 to -0.127
PC(P-18:1/22:6)		-0.0277354	-0.053 to -0.003	0.0308748	0.317409	-0.0279235	-0.05 to -0.005	-0.153521	-0.238 to -0.069	0.000382838	0.0011339	-0.150656	-0.243 to -0.066
PC(P-20:0/20:4)		-0.00414245	-0.03 to 0.022	0.75288	0.910634	-0.00450232	-0.028 to 0.023	-0.0698578	-0.156 to 0.016	0.111856	0.169863	-0.0654454	-0.163 to 0.012
PC(P-35:2)(a)		-0.0130933	-0.038 to 0.012	0.308383	0.684345	-0.0139437	-0.04 to 0.01	-0.187342	-0.272 to -0.103	1.72087e-05	7.06559e-05	-0.185815	-0.271 to -0.104
PC(P-35:2)(b)		-0.0101147	-0.036 to 0.016	0.440867	0.747528	-0.0105336	-0.036 to 0.014	-0.178736	-0.265 to -0.093	5.17061e-05	0.000192903	-0.178976	-0.268 to -0.098
PC(P-36:3)		-0.0137065	-0.04 to 0.012	0.303015	0.683546	-0.0137931	-0.041 to 0.011	-0.262694	-0.347 to -0.178	2.18156e-09	3.31373e-08	-0.261592	-0.345 to -0.185
PC(P-38:5) (a)		-0.0310298	-0.056 to -0.006	0.0165473	0.281362	-0.0314112	-0.053 to -0.006	-0.2911	-0.374 to -0.209	1.40801e-11	4.37045e-10	-0.289151	-0.39 to -0.21
PC(P-38:5) (b)		-0.0184464	-0.044 to 0.007	0.151949	0.477379	-0.0184793	-0.043 to 0.005	-0.226488	-0.31 to -0.143	1.75196e-07	1.40157e-06	-0.225602	-0.314 to -0.141
LPC(14:0) [sn1]		-0.017745	-0.04 to 0.005	0.125738	0.455946	-0.0165725	-0.043 to 0.005	-0.0937612	-0.169 to -0.019	0.0149032	0.0292783	-0.0926673	-0.172 to -0.016
LPC(14:0) [sn2]		-0.0172614	-0.04 to 0.005	0.137216	0.463077	-0.0169233	-0.039 to 0.006	-0.0984159	-0.174 to -0.023	0.011231	0.0231174	-0.0976122	-0.175 to -0.021
LPC(15-MHDA) [sn1] [104_sn1]		-0.000945056	-0.023 to 0.021	0.934101	0.980047	-0.000361838	-0.025 to 0.02	-0.048395	-0.123 to 0.026	0.204786	0.282263	-0.0488218	-0.122 to 0.034
LPC(15-MHDA) [sn1] / LPC(17:0) [sn2]		-0.00415991	-0.025 to 0.017	0.702425	0.892114	-0.00381495	-0.029 to 0.015	-0.0324618	-0.103 to 0.038	0.370142	0.464773	-0.0317534	-0.107 to 0.044
LPC(15-MHDA) [sn2]		-0.000225896	-0.023 to 0.022	0.984272	0.990718	0.000389289	-0.025 to 0.02	-0.061379	-0.137 to 0.014	0.112837	0.170353	-0.0598679	-0.142 to 0.022
LPC(15:0) [sn1]		-0.0056808	-0.028 to 0.016	0.610704	0.835813	-0.00578295	-0.028 to 0.016	-0.0439039	-0.116 to 0.029	0.235778	0.317645	-0.0417464	-0.13 to 0.025
LPC(15:0) [sn2]		-0.0081594	-0.031 to 0.015	0.483276	0.765859	-0.00735848	-0.032 to 0.015	-0.072529	-0.149 to 0.004	0.0632792	0.104256	-0.072782	-0.151 to 0.005
LPC(16:0) [sn1]		-0.0110706	-0.029 to 0.007	0.238651	0.617481	-0.0100414	-0.033 to 0.008	-0.0224035	-0.083 to 0.038	0.470619	0.567322	-0.0208423	-0.082 to 0.043
LPC(16:0) [sn2]		-0.0124633	-0.03 to 0.005	0.172615	0.515189	-0.0109309	-0.033 to 0.006	-0.00589471	-0.065 to 0.053	0.844393	0.885472	-0.00194239	-0.062 to 0.05
LPC(16:1) [sn1]		-0.0125304	-0.034 to 0.009	0.251014	0.632358	-0.0119163	-0.033 to 0.008	-0.0781504	-0.149 to -0.008	0.0304759	0.0561742	-0.074888	-0.162 to -0.009
LPC(16:1) [sn2]		-0.0120464	-0.035 to 0.011	0.301767	0.682716	-0.011761	-0.034 to 0.009	-0.105441	-0.182 to -0.029	0.00690408	0.0150072	-0.106253	-0.184 to -0.024
LPC(17:0) [sn1]		-0.00287189	-0.022 to 0.017	0.774108	0.91185	-0.00264417	-0.023 to 0.018	-0.00595369	-0.071 to 0.059	0.856955	0.892613	-0.00707553	-0.075 to 0.057
LPC(17:1) (a) [sn1] [104_sn1]		-0.00661255	-0.029 to 0.016	0.563518	0.811835	-0.00632945	-0.03 to 0.012	-0.0697007	-0.145 to 0.005	0.0690863	0.112628	-0.0700462	-0.151 to 0.008
LPC(17:1) [sn1] (a) / LPC(17:1) [sn2] (b)		-0.00578979	-0.029 to 0.017	0.619047	0.83931	-0.00559903	-0.03 to 0.018	-0.0783953	-0.155 to -0.002	0.0457806	0.0780785	-0.0772838	-0.162 to 0.008
LPC(17:1) [sn1] (b)		-0.00753075	-0.032 to 0.017	0.552939	0.803522	-0.00721995	-0.031 to 0.016	-0.0940705	-0.18 to -0.009	0.0314276	0.0570443	-0.0933131	-0.177 to -0.002
LPC(17:1) [sn2] (a)		-0.0063217	-0.03 to 0.017	0.594155	0.828141	-0.00522587	-0.031 to 0.015	-0.0869268	-0.165 to -0.009	0.0291123	0.0539168	-0.0855805	-0.17 to -0.008
LPC(18:0) [sn1]		-0.00677333	-0.025 to 0.012	0.477867	0.763749	-0.00665434	-0.031 to 0.014	0.0352975	-0.027 to 0.098	0.266902	0.35465	0.0356801	-0.019 to 0.1
LPC(18:0) [sn2]		-0.00861271	-0.027 to 0.01	0.36816	0.719227	-0.00816559	-0.03 to 0.011	0.0103994	-0.052 to 0.073	0.74598	0.811155	0.0127321	-0.05 to 0.068
LPC(18:1) [sn1]		-0.0106163	-0.031 to 0.01	0.317065	0.689713	-0.00986644	-0.032 to 0.012	-0.0575349	-0.127 to 0.012	0.105318	0.161836	-0.0551572	-0.13 to 0.017
LPC(18:1) [sn2]		-0.02076	-0.043 to 0.002	0.0699485	0.381993	-0.0201737	-0.044 to 0.004	-0.0938638	-0.169 to -0.019	0.0141767	0.0279927	-0.0899124	-0.171 to -0.021
LPC(18:2) [sn1]		-0.027038	-0.052 to -0.002	0.0362806	0.317409	-0.0263924	-0.054 to -0.001	-0.147034	-0.231 to -0.063	0.000612584	0.00170995	-0.146883	-0.227 to -0.071
LPC(18:2) [sn2]		-0.0283652	-0.054 to -0.003	0.031241	0.317409	-0.0286212	-0.058 to 0.001	-0.153266	-0.238 to -0.068	0.000449897	0.00130757	-0.152322	-0.235 to -0.074
LPC(18:3) (a) [sn1] [104_sn1]		-0.00923651	-0.034 to 0.015	0.464165	0.756706	-0.00851321	-0.037 to 0.014	-0.0837375	-0.168 to 0	0.0510956	0.086196	-0.0826602	-0.172 to -0.015
LPC(18:3) [sn1] (a)/LPC(18:3) [sn2] (b)		-0.00383305	-0.029 to 0.021	0.764532	0.91185	-0.00312289	-0.031 to 0.021	-0.0682218	-0.153 to 0.017	0.115838	0.173199	-0.0650651	-0.152 to 0.007
LPC(18:3) [sn1] (b)		0.00448316	-0.021 to 0.03	0.733716	0.903881	0.00462202	-0.021 to 0.028	-0.0186049	-0.106 to 0.068	0.674976	0.754728	-0.0183079	-0.103 to 0.065
LPC(18:3) [sn2] (a)		-0.0108879	-0.036 to 0.015	0.404784	0.727276	-0.0104752	-0.039 to 0.015	-0.0926975	-0.179 to -0.007	0.0351582	0.0624319	-0.0919645	-0.171 to -0.017
LPC(19:0) (a) [sn1] [104_sn1]		0.000605008	-0.021 to 0.022	0.956048	0.983273	0.000953616	-0.022 to 0.027	-0.071297	-0.143 to 0	0.0516212	0.0867058	-0.0683034	-0.148 to -0.004
LPC(19:0) [sn1] (a) / LPC(19:0) [sn2] (b)		-0.00868652	-0.029 to 0.012	0.40675	0.727276	-0.00793872	-0.034 to 0.013	-0.0372173	-0.105 to 0.031	0.285266	0.375198	-0.0334741	-0.11 to 0.026
LPC(19:0) [sn1] (b)		-0.00586845	-0.027 to 0.015	0.587379	0.826132	-0.00505727	-0.028 to 0.015	-0.00938255	-0.079 to 0.06	0.791809	0.846341	-0.00912748	-0.079 to 0.059
LPC(19:0) [sn2] (a)		-0.00415217	-0.026 to 0.018	0.71091	0.896113	-0.00374101	-0.03 to 0.021	-0.0595456	-0.133 to 0.014	0.114864	0.172407	-0.0588138	-0.138 to 0.019
LPC(19:1) (a)		-0.0131068	-0.035 to 0.008	0.232794	0.610298	-0.0125214	-0.038 to 0.01	-0.0800079	-0.151 to -0.009	0.0267602	0.0500383	-0.0796803	-0.152 to 0.001
LPC(19:1) (b)		-0.00825771	-0.029 to 0.013	0.445314	0.748556	-0.00781479	-0.03 to 0.013	-0.0418133	-0.111 to 0.028	0.239434	0.321455	-0.0419875	-0.109 to 0.025
LPC(19:1) (c)		-0.00594655	-0.029 to 0.018	0.619748	0.83931	-0.00646055	-0.03 to 0.02	-0.0134349	-0.093 to 0.066	0.739952	0.807857	-0.0115284	-0.105 to 0.07
LPC(20:0) [sn1]		-0.0131733	-0.034 to 0.007	0.205845	0.576784	-0.0128604	-0.035 to 0.008	-0.04865	-0.117 to 0.019	0.161933	0.230993	-0.0468028	-0.116 to 0.015
LPC(20:0) [sn2]		-0.0169999	-0.038 to 0.004	0.108198	0.429551	-0.016063	-0.04 to 0.003	-0.0602914	-0.129 to 0.009	0.0875657	0.138112	-0.0594597	-0.124 to -0.005
LPC(20:1) [sn1]		-0.00633852	-0.024 to 0.011	0.474443	0.763497	-0.00565527	-0.027 to 0.013	0.0174755	-0.04 to 0.075	0.550929	0.643857	0.0202419	-0.041 to 0.068
LPC(20:1) [sn2]		-0.0103668	-0.029 to 0.009	0.288549	0.662468	-0.00982024	-0.03 to 0.009	0.0253023	-0.038 to 0.088	0.430851	0.527661	0.0260298	-0.035 to 0.086
LPC(20:2) [sn1]		-0.00986868	-0.03 to 0.01	0.339841	0.704945	-0.00880061	-0.035 to 0.01	-0.016956	-0.084 to 0.05	0.621721	0.703288	-0.0153457	-0.085 to 0.049
LPC(20:2) [sn2]		-0.0062977	-0.028 to 0.016	0.572085	0.8146	-0.00539891	-0.029 to 0.017	-0.015136	-0.088 to 0.057	0.682176	0.761681	-0.0135481	-0.087 to 0.052
LPC(20:3) [sn1]		0.00882833	-0.016 to 0.033	0.480439	0.765546	0.00877874	-0.015 to 0.037	0.0582711	-0.024 to 0.14	0.164561	0.233881	0.0603096	-0.025 to 0.15
LPC(20:3) [sn2]		0.00743188	-0.018 to 0.033	0.564936	0.811835	0.00808274	-0.017 to 0.034	0.0622972	-0.022 to 0.147	0.149068	0.215413	0.0629141	-0.017 to 0.15
LPC(20:4) [sn1]		-0.0101489	-0.033 to 0.013	0.38459	0.722173	-0.00957889	-0.035 to 0.016	0.0336348	-0.043 to 0.11	0.388893	0.485179	0.0352619	-0.042 to 0.108
LPC(20:4) [sn2]		-0.0135968	-0.037 to 0.01	0.262292	0.64004	-0.0133611	-0.038 to 0.013	0.0181923	-0.062 to 0.099	0.65739	0.737189	0.0196112	-0.059 to 0.099
LPC(20:5) [sn1]		-0.0104584	-0.035 to 0.014	0.405873	0.727276	-0.0108049	-0.036 to 0.013	0.0100905	-0.074 to 0.095	0.814885	0.862689	0.0100169	-0.078 to 0.099
LPC(20:5) [sn2]		-0.0100367	-0.035 to 0.015	0.431849	0.747528	-0.00980682	-0.036 to 0.015	0.00949531	-0.076 to 0.095	0.827811	0.87074	0.00959376	-0.077 to 0.105
LPC(22:0) [sn1]		-0.0117768	-0.038 to 0.014	0.371775	0.719227	-0.0113741	-0.037 to 0.014	-0.149806	-0.235 to -0.065	0.000575243	0.00161151	-0.147366	-0.234 to -0.073
LPC(22:0) [sn2]		-0.0169718	-0.043 to 0.009	0.209352	0.577643	-0.0158388	-0.041 to 0.012	-0.155044	-0.241 to -0.069	0.000448658	0.00130757	-0.15257	-0.243 to -0.078
LPC(22:1) [sn1]		-0.0225068	-0.044 to -0.001	0.0392345	0.334571	-0.0221753	-0.044 to 0	-0.0879857	-0.159 to -0.017	0.0153574	0.0299431	-0.085973	-0.161 to -0.019
LPC(22:1) [sn2]		-0.0195649	-0.042 to 0.003	0.0861749	0.401314	-0.0198649	-0.043 to 0.004	-0.0715253	-0.145 to 0.002	0.0576163	0.0959447	-0.0741628	-0.137 to 0.009
LPC(22:4) [sn1]		-0.00104425	-0.023 to 0.021	0.924999	0.977928	-0.000664942	-0.022 to 0.023	0.0556436	-0.016 to 0.128	0.130859	0.191237	0.057494	-0.019 to 0.124
LPC(22:4) [sn2]		-0.00118678	-0.024 to 0.022	0.920445	0.976742	-0.00117312	-0.025 to 0.022	0.0478668	-0.03 to 0.126	0.22762	0.308261	0.0477355	-0.023 to 0.117
LPC(22:5) (n3) [sn1] [104_sn1]		-0.023856	-0.047 to -0.001	0.0446657	0.350107	-0.0238982	-0.047 to -0.002	-0.0143795	-0.092 to 0.064	0.718347	0.792941	-0.0142821	-0.09 to 0.061
LPC(22:5) [sn1] (n3)/LPC(22:5) [sn2] (n6)		-0.0195941	-0.043 to 0.004	0.0999874	0.41053	-0.0197467	-0.043 to 0.003	-0.0134349	-0.092 to 0.065	0.738333	0.807857	-0.0113656	-0.101 to 0.061
LPC(22:5) [sn1] (n6)		-0.00309726	-0.027 to 0.021	0.800652	0.921805	-0.00233882	-0.028 to 0.019	0.0275053	-0.053 to 0.108	0.502293	0.597821	0.026581	-0.047 to 0.11
LPC(22:5) [sn2] (n3)		-0.0230795	-0.048 to 0.001	0.0659805	0.38107	-0.0232462	-0.046 to 0.004	-0.0213023	-0.104 to 0.061	0.613042	0.696516	-0.0187255	-0.109 to 0.06
LPC(22:6) [sn1]		-0.0231494	-0.047 to 0	0.0530033	0.359736	-0.0231206	-0.047 to 0	0.0218813	-0.058 to 0.101	0.589727	0.672982	0.0259213	-0.06 to 0.096
LPC(22:6) [sn2]		-0.0271095	-0.051 to -0.003	0.0271927	0.314949	-0.026662	-0.05 to -0.002	0.00972844	-0.072 to 0.091	0.814868	0.862689	0.0127653	-0.073 to 0.087
LPC(24:0) [sn1]		-0.00588482	-0.033 to 0.021	0.668674	0.866263	-0.00502058	-0.035 to 0.018	-0.109388	-0.197 to -0.022	0.0147355	0.0290222	-0.107655	-0.198 to -0.017
LPC(24:0) [sn2]		-0.00956921	-0.037 to 0.017	0.488145	0.76958	-0.00941992	-0.036 to 0.015	-0.119848	-0.207 to -0.032	0.00746096	0.0159937	-0.118882	-0.221 to -0.03
LPC(26:0) [sn1]		0.00671364	-0.019 to 0.033	0.61028	0.835813	0.00648905	-0.02 to 0.032	-0.0270685	-0.115 to 0.06	0.544305	0.638037	-0.0276178	-0.122 to 0.073
LPC(26:0) [sn2]		-0.00423287	-0.03 to 0.022	0.750237	0.910634	-0.00473829	-0.03 to 0.023	-0.0923776	-0.179 to -0.005	0.0377549	0.0661022	-0.0918631	-0.191 to 0.001
LPC(O-16:0)		0.00136847	-0.015 to 0.018	0.873481	0.955132	0.00199802	-0.02 to 0.018	0.00908582	-0.046 to 0.064	0.746346	0.811155	0.00946394	-0.045 to 0.063
LPC(O-18:0)		-0.00396985	-0.023 to 0.015	0.675923	0.871289	-0.00369633	-0.025 to 0.018	0.0109784	-0.051 to 0.073	0.726902	0.800108	0.0122814	-0.053 to 0.08
LPC(O-18:1)		0.00542271	-0.01 to 0.021	0.4969	0.774286	0.00621296	-0.015 to 0.021	0.037251	-0.014 to 0.089	0.157809	0.225941	0.0385593	-0.021 to 0.081
LPC(O-20:0)		0.00302522	-0.019 to 0.026	0.792291	0.921805	0.00315977	-0.02 to 0.028	0.00437096	-0.07 to 0.079	0.908277	0.931074	0.00483535	-0.07 to 0.079
LPC(O-20:1)		0.0193413	0.002 to 0.037	0.0336648	0.317409	0.0192169	-0.002 to 0.037	0.0865439	0.028 to 0.145	0.00390459	0.00896439	0.086791	0.028 to 0.145
LPC(O-22:0)		0.00480321	-0.021 to 0.031	0.718799	0.898209	0.00494181	-0.021 to 0.033	-0.0327578	-0.119 to 0.054	0.457233	0.555263	-0.0290997	-0.126 to 0.049
LPC(O-22:1)		0.0211545	-0.003 to 0.045	0.0828375	0.401314	0.0217699	-0.004 to 0.042	0.0817622	0.003 to 0.16	0.042193	0.0727594	0.0852181	-0.001 to 0.168
LPC(O-24:0)		0.0102849	-0.017 to 0.037	0.457269	0.750192	0.00956664	-0.013 to 0.04	-0.0581448	-0.147 to 0.03	0.198437	0.275962	-0.0584835	-0.152 to 0.034
LPC(O-24:1)		0.0209388	-0.005 to 0.047	0.119468	0.448142	0.0201189	-0.003 to 0.046	0.0195738	-0.067 to 0.106	0.657112	0.737189	0.0218218	-0.071 to 0.106
LPC(O-24:2)		0.0284949	0.005 to 0.052	0.0183076	0.281362	0.0291331	0.006 to 0.052	0.0347312	-0.045 to 0.114	0.393526	0.488601	0.0360309	-0.047 to 0.111
LPC(P-16:0)		-0.0213744	-0.039 to -0.004	0.0191029	0.281362	-0.0209661	-0.042 to -0.005	-0.142814	-0.2 to -0.086	1.1833e-06	7.11813e-06	-0.140272	-0.198 to -0.092
LPC(P-17:0) (a)		-0.0178549	-0.039 to 0.003	0.0988934	0.408198	-0.0176141	-0.039 to 0.003	-0.127657	-0.197 to -0.058	0.000353432	0.00106304	-0.124983	-0.198 to -0.054
LPC(P-17:0) (b)		-0.0157338	-0.036 to 0.004	0.120538	0.448142	-0.0156162	-0.038 to 0.003	-0.124755	-0.19 to -0.059	0.000207102	0.000664094	-0.123697	-0.184 to -0.056
LPC(P-18:0)		-0.0253115	-0.045 to -0.005	0.0141805	0.275101	-0.0252402	-0.048 to -0.004	-0.115053	-0.182 to -0.049	0.000747258	0.0020418	-0.113884	-0.187 to -0.051
LPC(P-18:1)		-0.020341	-0.037 to -0.003	0.018822	0.281362	-0.0189169	-0.041 to -0.003	-0.120949	-0.175 to -0.067	1.42194e-05	6.02964e-05	-0.11905	-0.177 to -0.069
LPC(P-20:0)		-0.0119107	-0.035 to 0.012	0.320723	0.689713	-0.0110906	-0.035 to 0.013	-0.12693	-0.205 to -0.048	0.00161427	0.00408036	-0.125545	-0.212 to -0.047
PE(15-MHDA_18:1)		0.0267785	0.001 to 0.052	0.0412032	0.337231	0.0273719	0.003 to 0.052	0.0953935	0.008 to 0.183	0.0330986	0.0590448	0.0938391	0.005 to 0.186
PE(15-MHDA_18:2)		0.0208834	-0.005 to 0.047	0.116526	0.44544	0.0211378	-0.005 to 0.044	0.113669	0.026 to 0.202	0.0114908	0.0235516	0.112945	0.019 to 0.206
PE(15-MHDA_20:4)		0.016463	-0.009 to 0.042	0.202992	0.572807	0.0179202	-0.01 to 0.04	0.102839	0.016 to 0.19	0.0213845	0.0406724	0.103357	0.017 to 0.204
PE(15-MHDA_22:6)		0.0110904	-0.014 to 0.036	0.389059	0.722173	0.0111525	-0.011 to 0.035	0.0944037	0.008 to 0.181	0.0333829	0.0594155	0.0942731	0.008 to 0.191
PE(16:0_16:0)		0.00237164	-0.023 to 0.028	0.857404	0.945093	0.00184371	-0.024 to 0.033	0.0650251	-0.02 to 0.15	0.135602	0.197795	0.0673752	-0.02 to 0.149
PE(16:0_16:1)		0.0176929	-0.008 to 0.043	0.1789	0.529873	0.0171978	-0.007 to 0.043	0.112265	0.026 to 0.199	0.0115027	0.0235516	0.112676	0.025 to 0.201
PE(16:0_18:1)		0.0290381	0.003 to 0.055	0.0276355	0.315369	0.0295371	0.001 to 0.054	0.200637	0.114 to 0.287	6.53458e-06	3.13015e-05	0.201362	0.096 to 0.298
PE(16:0_18:2)		0.0235278	-0.002 to 0.049	0.0762764	0.394603	0.0240424	-0.004 to 0.052	0.222404	0.136 to 0.309	5.8517e-07	4.05439e-06	0.221668	0.126 to 0.314
PE(16:0_18:3) (a)		0.0239874	-0.002 to 0.05	0.0682648	0.38107	0.0242899	0.001 to 0.05	0.133073	0.046 to 0.22	0.0027306	0.00649984	0.134418	0.046 to 0.223
PE(16:0_18:3) (b)		0.0335994	0.008 to 0.059	0.0100927	0.270068	0.0334719	0.011 to 0.058	0.199687	0.115 to 0.284	4.50616e-06	2.24153e-05	0.200286	0.114 to 0.288
PE(16:0_20:3)		0.0317438	0.006 to 0.058	0.0175384	0.281362	0.0316995	0.008 to 0.056	0.186748	0.1 to 0.274	3.17229e-05	0.000123085	0.187885	0.09 to 0.279
PE(16:0_20:4)		0.0235419	-0.002 to 0.049	0.0675657	0.38107	0.0240407	-0.001 to 0.049	0.259593	0.175 to 0.344	2.96417e-09	4.25963e-08	0.258946	0.172 to 0.355
PE(16:0_20:5)		0.0110382	-0.014 to 0.037	0.396577	0.722173	0.0109364	-0.013 to 0.037	0.0991611	0.012 to 0.186	0.0263692	0.0494263	0.100589	0.003 to 0.195
PE(16:0_22:6)		0.0104433	-0.015 to 0.036	0.416276	0.737511	0.0109527	-0.013 to 0.033	0.212479	0.128 to 0.297	1.13432e-06	6.87679e-06	0.211217	0.126 to 0.297
PE(16:1_18:2)		0.0173525	-0.009 to 0.044	0.196834	0.565717	0.0173705	-0.007 to 0.045	0.108258	0.02 to 0.197	0.0169688	0.0329672	0.10748	0.026 to 0.207
PE(16:1_20:4)		0.0148585	-0.011 to 0.04	0.253864	0.633435	0.015135	-0.01 to 0.042	0.11096	0.023 to 0.199	0.0134844	0.0269947	0.111921	0.017 to 0.203
PE(17:0_18:1)		0.0307026	0.005 to 0.056	0.0197577	0.281362	0.0312253	0.005 to 0.055	0.169543	0.083 to 0.256	0.000144114	0.000482036	0.170675	0.076 to 0.26
PE(17:0_18:2)		0.0282293	0.002 to 0.054	0.0356085	0.317409	0.0279004	-0.001 to 0.055	0.184892	0.098 to 0.272	3.70158e-05	0.000140805	0.186399	0.099 to 0.27
PE(17:0_20:4)		0.0267654	0.002 to 0.052	0.0368129	0.317409	0.027599	0.003 to 0.053	0.210242	0.124 to 0.296	2.07939e-06	1.16928e-05	0.209925	0.122 to 0.312
PE(17:0_22:6)		0.00964286	-0.015 to 0.035	0.450336	0.748556	0.00943494	-0.012 to 0.036	0.1631	0.078 to 0.249	0.000204033	0.000656969	0.16155	0.075 to 0.261
PE(18:0_18:1)		0.0299853	0.004 to 0.056	0.0250513	0.308568	0.0299853	0.004 to 0.058	0.197611	0.111 to 0.284	9.69284e-06	4.34777e-05	0.197274	0.104 to 0.283
PE(18:0_18:2)		0.0249899	-0.001 to 0.051	0.062361	0.38107	0.0253585	-0.004 to 0.05	0.241898	0.156 to 0.328	5.07994e-08	4.92755e-07	0.24353	0.151 to 0.33
PE(18:0_20:3) (a)		0.0427375	0.017 to 0.068	0.00115878	0.0899216	0.0429724	0.02 to 0.07	0.268409	0.184 to 0.353	1.04652e-09	1.69187e-08	0.266043	0.166 to 0.363
PE(18:0_20:3) (b)		0.0278183	0.002 to 0.054	0.0350805	0.317409	0.0279054	0.001 to 0.054	0.183474	0.098 to 0.269	2.95327e-05	0.000116332	0.187296	0.096 to 0.28
PE(18:0_20:4)		0.021085	-0.005 to 0.047	0.109848	0.430514	0.0218274	-0.003 to 0.05	0.318614	0.236 to 0.402	2.32776e-13	1.64213e-11	0.319423	0.23 to 0.402
PE(18:0_22:4)		0.0268234	0.001 to 0.052	0.0403061	0.337231	0.0269175	0.003 to 0.055	0.273796	0.192 to 0.356	1.415e-10	2.88959e-09	0.274851	0.188 to 0.358
PE(18:0_22:5) (n3)		0.01722	-0.008 to 0.043	0.189151	0.55181	0.016841	-0.01 to 0.043	0.218848	0.134 to 0.304	5.72966e-07	4.04201e-06	0.218502	0.126 to 0.313
PE(18:0_22:5) (n6)		0.0282271	0.003 to 0.054	0.0318268	0.317409	0.0283895	0.005 to 0.056	0.22046	0.135 to 0.306	5.51589e-07	3.94703e-06	0.218547	0.125 to 0.312
PE(18:0_22:6)		0.00756096	-0.018 to 0.033	0.559047	0.81088	0.00781585	-0.016 to 0.03	0.257934	0.175 to 0.341	2.22054e-09	3.31373e-08	0.256172	0.176 to 0.346
PE(18:1_18:1)		0.0226608	-0.004 to 0.049	0.0920307	0.401314	0.0231699	-0.004 to 0.049	0.135344	0.048 to 0.223	0.00263793	0.00633756	0.138927	0.049 to 0.217
PE(18:1_18:2)		0.0201459	-0.006 to 0.046	0.130397	0.458452	0.0200078	-0.008 to 0.046	0.156191	0.068 to 0.244	0.000524686	0.00148597	0.157507	0.067 to 0.243
PE(18:1_22:6) (a)		0.00294776	-0.023 to 0.029	0.825292	0.928155	0.00331248	-0.026 to 0.027	0.141988	0.056 to 0.228	0.00134165	0.00348562	0.142647	0.046 to 0.224
PE(18:1_22:6) (b)		0.00826632	-0.017 to 0.034	0.525507	0.790297	0.00801863	-0.014 to 0.033	0.143421	0.057 to 0.229	0.00115867	0.0030479	0.144129	0.05 to 0.238
PE(20:0_20:4)		0.00292772	-0.02 to 0.025	0.798931	0.921805	0.00343888	-0.019 to 0.025	0.14398	0.071 to 0.217	0.000138033	0.000465713	0.144333	0.072 to 0.212
PE(36:0)		0.0171195	-0.009 to 0.043	0.191081	0.552971	0.0175058	-0.008 to 0.042	0.0155849	-0.071 to 0.102	0.723883	0.797917	0.0146253	-0.067 to 0.101
PE(38:5) (a)		0.0232773	-0.002 to 0.049	0.0752885	0.394603	0.0234616	-0.003 to 0.05	0.15799	0.072 to 0.244	0.000359264	0.00107226	0.159268	0.058 to 0.253
PE(38:5) (b)		0.0224096	-0.003 to 0.048	0.0865591	0.401314	0.0228346	0 to 0.047	0.162003	0.076 to 0.248	0.000252147	0.000795391	0.16202	0.071 to 0.262
PE(O-16:0/18:2)		-0.0111712	-0.038 to 0.015	0.408664	0.727346	-0.0115894	-0.035 to 0.014	-0.260165	-0.345 to -0.175	4.02504e-09	5.67896e-08	-0.260993	-0.344 to -0.169
PE(O-16:0/20:3)		-0.00464407	-0.031 to 0.022	0.731167	0.903881	-0.00510333	-0.027 to 0.022	-0.209919	-0.296 to -0.123	2.56765e-06	1.40317e-05	-0.21142	-0.301 to -0.107
PE(O-16:0/20:4)		-0.0283302	-0.055 to -0.002	0.0368079	0.317409	-0.027385	-0.051 to -0.006	-0.294368	-0.378 to -0.21	1.93327e-11	5.55637e-10	-0.292717	-0.383 to -0.209
PE(O-16:0/22:4)		-0.00663764	-0.034 to 0.02	0.628985	0.84009	-0.00658942	-0.031 to 0.019	-0.186804	-0.274 to -0.1	2.92079e-05	0.000115639	-0.189188	-0.278 to -0.09
PE(O-16:0/22:6)		-0.0345636	-0.06 to -0.009	0.00858809	0.261756	-0.0348546	-0.056 to -0.013	-0.255052	-0.339 to -0.171	5.36511e-09	7.03431e-08	-0.253397	-0.346 to -0.173
PE(O-18:0/20:4)		-0.0258364	-0.052 to 0	0.0500483	0.359736	-0.0262175	-0.048 to -0.002	-0.257389	-0.342 to -0.172	5.4389e-09	7.03431e-08	-0.255049	-0.35 to -0.174
PE(O-18:0/22:5)		-0.0229552	-0.049 to 0.003	0.0818962	0.401314	-0.0236374	-0.052 to 0.003	-0.22303	-0.309 to -0.137	4.93239e-07	3.64527e-06	-0.224322	-0.319 to -0.13
PE(O-18:0/22:6)		-0.0381248	-0.063 to -0.013	0.00297759	0.125524	-0.0392536	-0.061 to -0.019	-0.260018	-0.344 to -0.176	2.70623e-09	3.96232e-08	-0.259103	-0.349 to -0.167
PE(O-18:1/18:2)		-0.0224685	-0.049 to 0.004	0.0965646	0.404409	-0.0224344	-0.047 to 0.003	-0.245547	-0.33 to -0.161	2.28116e-08	2.45859e-07	-0.245051	-0.331 to -0.16
PE(O-18:1/22:6)		-0.0412414	-0.067 to -0.015	0.00182458	0.107722	-0.04136	-0.062 to -0.017	-0.215758	-0.3 to -0.132	6.9668e-07	4.70107e-06	-0.214087	-0.305 to -0.127
PE(O-34:1)		-0.0318738	-0.058 to -0.005	0.0188984	0.281362	-0.0315972	-0.056 to -0.009	-0.284833	-0.369 to -0.201	8.95624e-11	1.88253e-09	-0.282701	-0.371 to -0.2
PE(O-36:5)		-0.0199965	-0.046 to 0.006	0.132069	0.461648	-0.0199155	-0.044 to 0.005	-0.251595	-0.337 to -0.166	1.42982e-08	1.62317e-07	-0.251767	-0.337 to -0.161
PE(O-38:5) (a)		-0.0281535	-0.054 to -0.002	0.0360014	0.317409	-0.0277754	-0.054 to -0.005	-0.286016	-0.37 to -0.202	7.53553e-11	1.71987e-09	-0.284993	-0.378 to -0.194
PE(O-38:5) (b)		-0.0153496	-0.041 to 0.011	0.24848	0.632199	-0.0166888	-0.039 to 0.01	-0.244986	-0.331 to -0.159	3.39503e-08	3.56019e-07	-0.246591	-0.336 to -0.15
PE(P-15:0/20:4) (a)		0.0153815	-0.01 to 0.041	0.230897	0.607376	0.0153545	-0.007 to 0.041	-0.00284351	-0.089 to 0.084	0.94872	0.956113	0.000202133	-0.09 to 0.082
PE(P-15:0/20:4) (b)		0.00108474	-0.025 to 0.027	0.934755	0.980047	0.000689835	-0.025 to 0.026	-0.071274	-0.159 to 0.016	0.1117	0.169863	-0.0727163	-0.166 to 0.016
PE(P-15:0/22:6) (a)		0.00628223	-0.019 to 0.032	0.626033	0.84009	0.00611181	-0.017 to 0.03	-0.0537937	-0.141 to 0.033	0.225184	0.30603	-0.0527817	-0.143 to 0.038
PE(P-15:0/22:6) (b)		-0.0201443	-0.046 to 0.005	0.122342	0.452082	-0.0214191	-0.044 to 0.003	-0.188354	-0.274 to -0.103	1.83644e-05	7.5004e-05	-0.185521	-0.277 to -0.111
PE(P-16:0/18:1)		-0.0123229	-0.039 to 0.014	0.363542	0.719227	-0.0131353	-0.039 to 0.016	-0.152905	-0.239 to -0.067	0.00053365	0.00150586	-0.152055	-0.24 to -0.061
PE(P-16:0/18:2)		-0.0105172	-0.037 to 0.016	0.440913	0.747528	-0.0113074	-0.038 to 0.017	-0.181424	-0.267 to -0.096	4.00047e-05	0.000151432	-0.182521	-0.268 to -0.1
PE(P-16:0/18:3)		-0.00869629	-0.035 to 0.018	0.519895	0.790297	-0.00841617	-0.037 to 0.016	-0.171486	-0.257 to -0.086	0.00010084	0.00034934	-0.171152	-0.255 to -0.087
PE(P-16:0/20:3) (a)		-0.00917042	-0.036 to 0.018	0.501855	0.77999	-0.00980111	-0.035 to 0.018	-0.162579	-0.249 to -0.076	0.000261244	0.00081744	-0.161139	-0.253 to -0.085
PE(P-16:0/20:3) (b)		-0.0186576	-0.045 to 0.008	0.167295	0.509102	-0.0185917	-0.045 to 0.01	-0.189669	-0.275 to -0.104	1.58609e-05	6.54685e-05	-0.191846	-0.274 to -0.1
PE(P-16:0/20:4)		-0.0313947	-0.057 to -0.005	0.01827	0.281362	-0.0313715	-0.055 to -0.005	-0.173189	-0.259 to -0.088	8.41663e-05	0.000295534	-0.173411	-0.255 to -0.09
PE(P-16:0/20:5)		-0.02801	-0.054 to -0.002	0.0320201	0.317409	-0.0287426	-0.055 to -0.002	-0.202689	-0.288 to -0.117	4.59339e-06	2.27036e-05	-0.202408	-0.299 to -0.116
PE(P-16:0/22:4)		-0.0121417	-0.038 to 0.014	0.359475	0.71895	-0.0104557	-0.037 to 0.011	-0.13868	-0.222 to -0.055	0.00118787	0.00311416	-0.13672	-0.225 to -0.049
PE(P-16:0/22:5) (n3)		-0.0241585	-0.05 to 0.002	0.072628	0.388685	-0.0242954	-0.049 to 0.003	-0.177479	-0.263 to -0.092	5.89139e-05	0.000214584	-0.178061	-0.266 to -0.096
PE(P-16:0/22:5) (n6)		-0.00540694	-0.033 to 0.022	0.697477	0.888739	-0.00544115	-0.028 to 0.018	-0.163342	-0.251 to -0.076	0.000291679	0.000887619	-0.163871	-0.247 to -0.07
PE(P-16:0/22:6)		-0.032587	-0.058 to -0.007	0.0122781	0.275101	-0.0335993	-0.056 to -0.007	-0.176754	-0.262 to -0.091	5.75008e-05	0.000210475	-0.174171	-0.267 to -0.103
PE(P-17:0/20:4) (a)		-0.0156088	-0.04 to 0.009	0.218524	0.584741	-0.0157724	-0.041 to 0.009	-0.180316	-0.264 to -0.096	3.16521e-05	0.000123085	-0.178859	-0.264 to -0.099
PE(P-17:0/20:4) (b)		-0.0217516	-0.047 to 0.003	0.0918407	0.401314	-0.0218734	-0.047 to 0.003	-0.174279	-0.259 to -0.09	5.91765e-05	0.000214584	-0.173962	-0.262 to -0.09
PE(P-17:0/22:6) (a)		-0.0239811	-0.048 to 0	0.0534114	0.359736	-0.0245982	-0.049 to -0.001	-0.17924	-0.263 to -0.095	3.54898e-05	0.000136337	-0.176637	-0.267 to -0.101
PE(P-17:0/22:6) (b)		-0.0302612	-0.055 to -0.005	0.0171412	0.281362	-0.0312664	-0.056 to -0.006	-0.163594	-0.248 to -0.079	0.000161805	0.000532038	-0.16124	-0.246 to -0.09
PE(P-18:0/18:1)		-0.0118716	-0.038 to 0.014	0.371415	0.719227	-0.0119224	-0.039 to 0.014	-0.162517	-0.249 to -0.076	0.000240241	0.000764045	-0.162993	-0.249 to -0.072
PE(P-18:0/18:2)		-0.0120601	-0.038 to 0.014	0.366935	0.719227	-0.0120689	-0.038 to 0.014	-0.207312	-0.293 to -0.122	2.78835e-06	1.49933e-05	-0.205797	-0.299 to -0.128
PE(P-18:0/18:3)		-0.0076278	-0.034 to 0.018	0.564385	0.811835	-0.00792337	-0.031 to 0.016	-0.160458	-0.246 to -0.075	0.000275266	0.000844293	-0.159301	-0.241 to -0.079
PE(P-18:0/20:3) (a)		-0.0109753	-0.037 to 0.015	0.409859	0.727804	-0.01184	-0.039 to 0.013	-0.157099	-0.245 to -0.07	0.000466667	0.00134622	-0.155478	-0.247 to -0.069
PE(P-18:0/20:3) (b)		-0.0111953	-0.037 to 0.015	0.398312	0.722173	-0.0116297	-0.036 to 0.016	-0.169689	-0.256 to -0.083	0.000128977	0.00044286	-0.169956	-0.262 to -0.08
PE(P-18:0/20:4)		-0.0269798	-0.052 to -0.002	0.036433	0.317409	-0.0276367	-0.053 to -0.003	-0.155414	-0.24 to -0.071	0.000357206	0.00107024	-0.155055	-0.242 to -0.065
PE(P-18:0/20:5)		-0.0223739	-0.047 to 0.002	0.0783237	0.394665	-0.0231954	-0.051 to 0.002	-0.192067	-0.278 to -0.107	1.2923e-05	5.57127e-05	-0.192648	-0.284 to -0.09
PE(P-18:0/22:4)		-0.00876953	-0.033 to 0.015	0.476939	0.763749	-0.00863999	-0.03 to 0.012	-0.0521433	-0.132 to 0.027	0.199366	0.276758	-0.0523151	-0.137 to 0.033
PE(P-18:0/22:5) (n3)		-0.0252574	-0.051 to 0	0.0532032	0.359736	-0.0255196	-0.053 to 0.002	-0.152222	-0.238 to -0.066	0.000555019	0.00156049	-0.152421	-0.246 to -0.06
PE(P-18:0/22:5) (n6)		-0.0171641	-0.044 to 0.01	0.207862	0.577643	-0.0170343	-0.041 to 0.007	-0.167836	-0.255 to -0.081	0.000177431	0.000578513	-0.170127	-0.254 to -0.083
PE(P-18:0/22:6)		-0.0311389	-0.056 to -0.006	0.0135855	0.275101	-0.0318055	-0.055 to -0.009	-0.162943	-0.247 to -0.079	0.00017256	0.000565007	-0.162991	-0.25 to -0.079
PE(P-18:1/18:1)		-0.0300542	-0.056 to -0.004	0.0236171	0.300982	-0.0303249	-0.055 to -0.005	-0.235512	-0.321 to -0.15	9.40479e-08	8.38864e-07	-0.238973	-0.325 to -0.135
PE(P-18:1/18:1) (a)		-0.0334198	-0.059 to -0.007	0.0121714	0.275101	-0.0337571	-0.057 to -0.009	-0.244801	-0.33 to -0.16	2.69001e-08	2.85952e-07	-0.244562	-0.338 to -0.163
PE(P-18:1/18:1) (b)		-0.00946274	-0.035 to 0.016	0.470959	0.762972	-0.0105894	-0.034 to 0.015	-0.15197	-0.239 to -0.065	0.000627753	0.00173358	-0.150834	-0.245 to -0.059
PE(P-18:1/18:2) (a)		-0.0224794	-0.048 to 0.003	0.0904581	0.401314	-0.0231086	-0.049 to 0.002	-0.218366	-0.303 to -0.133	6.65155e-07	4.52772e-06	-0.216819	-0.304 to -0.134
PE(P-18:1/18:2) (b)		-0.00142602	-0.028 to 0.025	0.916385	0.976742	-0.00226069	-0.025 to 0.027	-0.168025	-0.255 to -0.081	0.000161302	0.000532038	-0.166795	-0.259 to -0.076
PE(P-18:1/18:3)		-0.022064	-0.049 to 0.005	0.109049	0.429551	-0.0213927	-0.047 to 0.003	-0.197775	-0.284 to -0.112	7.69906e-06	3.55623e-05	-0.196869	-0.278 to -0.108
PE(P-18:1/20:3) (a)		-0.0172555	-0.044 to 0.009	0.202957	0.572807	-0.0166665	-0.043 to 0.01	-0.204228	-0.29 to -0.118	3.96278e-06	2.02311e-05	-0.205991	-0.289 to -0.117
PE(P-18:1/20:3) (b)		-0.0122163	-0.039 to 0.014	0.364505	0.719227	-0.0132447	-0.04 to 0.014	-0.174133	-0.261 to -0.087	9.44373e-05	0.000328625	-0.171048	-0.265 to -0.091
PE(P-18:1/20:4) (a)		-0.0310543	-0.057 to -0.005	0.0199419	0.281362	-0.0302075	-0.057 to -0.006	-0.193426	-0.279 to -0.108	1.10347e-05	4.8653e-05	-0.191514	-0.277 to -0.108
PE(P-18:1/20:4) (b)		-0.0100274	-0.035 to 0.015	0.439657	0.747528	-0.0103886	-0.032 to 0.015	-0.133451	-0.219 to -0.048	0.00234686	0.00570897	-0.131446	-0.22 to -0.047
PE(P-18:1/20:5) (a)		-0.0350464	-0.06 to -0.01	0.00705412	0.260667	-0.035898	-0.062 to -0.012	-0.233014	-0.318 to -0.148	1.06446e-07	9.17801e-07	-0.230132	-0.326 to -0.141
PE(P-18:1/20:5) (b)		-0.00645719	-0.032 to 0.019	0.622369	0.84009	-0.00673446	-0.031 to 0.02	-0.13986	-0.227 to -0.053	0.00167198	0.00419889	-0.137993	-0.23 to -0.051
PE(P-18:1/22:4)		-0.0104194	-0.037 to 0.016	0.434896	0.747528	-0.0100838	-0.032 to 0.015	-0.203928	-0.288 to -0.12	2.80158e-06	1.49933e-05	-0.207401	-0.291 to -0.127
PE(P-18:1/22:5) (a)		-0.0336493	-0.059 to -0.008	0.0105424	0.272697	-0.0338949	-0.059 to -0.01	-0.209797	-0.294 to -0.125	1.509e-06	8.75396e-06	-0.206765	-0.3 to -0.123
PE(P-18:1/22:5) (b)		-0.0202224	-0.047 to 0.007	0.138999	0.463077	-0.01978	-0.044 to 0.002	-0.209461	-0.295 to -0.124	2.3108e-06	1.28084e-05	-0.208563	-0.297 to -0.12
PE(P-18:1/22:6) (a)		-0.035271	-0.061 to -0.01	0.00672467	0.260667	-0.035333	-0.057 to -0.012	-0.154692	-0.239 to -0.07	0.000372117	0.00110637	-0.152592	-0.255 to -0.074
PE(P-18:1/22:6) (b)		-0.0225991	-0.048 to 0.003	0.0784675	0.394665	-0.0231826	-0.047 to 0.002	-0.131379	-0.217 to -0.046	0.00269463	0.00643396	-0.129439	-0.219 to -0.054
PE(P-19:0/20:4) (a)		-0.00856476	-0.034 to 0.016	0.502571	0.77999	-0.00926439	-0.032 to 0.017	-0.0743174	-0.16 to 0.011	0.0888084	0.139505	-0.0733164	-0.158 to 0.013
PE(P-19:0/20:4) (b)		-0.0100626	-0.036 to 0.016	0.441195	0.747528	-0.00969103	-0.036 to 0.012	-0.120475	-0.205 to -0.036	0.00562921	0.0124452	-0.119272	-0.211 to -0.045
PE(P-20:0/18:1)		-0.00488153	-0.031 to 0.022	0.717327	0.897815	-0.00473679	-0.031 to 0.022	-0.110321	-0.197 to -0.023	0.0132388	0.0266147	-0.10881	-0.196 to -0.031
PE(P-20:0/18:2)		0.00258702	-0.024 to 0.029	0.847978	0.944091	0.00246336	-0.027 to 0.028	-0.140698	-0.227 to -0.054	0.00152487	0.00390529	-0.139458	-0.242 to -0.058
PE(P-20:0/20:4)		-0.0132078	-0.039 to 0.013	0.320204	0.689713	-0.0130135	-0.037 to 0.012	-0.064108	-0.15 to 0.022	0.142824	0.20755	-0.0632454	-0.143 to 0.007
PE(P-20:0/22:6)		-0.0112311	-0.037 to 0.014	0.386148	0.722173	-0.0110401	-0.036 to 0.012	-0.0143485	-0.1 to 0.071	0.743327	0.810143	-0.0136322	-0.096 to 0.069
PE(P-20:1/20:4)		0.0253643	-0.001 to 0.052	0.0644616	0.38107	0.0241752	-0.001 to 0.058	0.0715095	-0.016 to 0.159	0.110775	0.168883	0.0727822	-0.019 to 0.156
PE(P-20:1/22:6)		0.0162923	-0.009 to 0.042	0.213694	0.577792	0.0166817	-0.01 to 0.044	0.0905099	0.005 to 0.176	0.039423	0.0684391	0.0927223	-0.001 to 0.181
LPE(16:0) [sn1]		-0.011828	-0.035 to 0.012	0.321748	0.689713	-0.0112021	-0.037 to 0.012	0.00924812	-0.069 to 0.087	0.816806	0.863544	0.0105268	-0.075 to 0.085
LPE(16:0) [sn2]		-0.0117591	-0.035 to 0.012	0.326339	0.691909	-0.0119473	-0.036 to 0.013	0.00950857	-0.069 to 0.088	0.813456	0.862689	0.00955561	-0.075 to 0.089
LPE(17:0) [sn1]		-0.0158026	-0.042 to 0.011	0.240261	0.617481	-0.0155998	-0.036 to 0.009	-0.0246158	-0.112 to 0.063	0.581647	0.667689	-0.0220421	-0.117 to 0.062
LPE(17:0) [sn2]		-0.0144024	-0.04 to 0.011	0.275919	0.649412	-0.0132295	-0.04 to 0.008	-0.0291599	-0.116 to 0.058	0.511137	0.607416	-0.0281045	-0.129 to 0.056
LPE(18:0) [sn1]		0.00206209	-0.018 to 0.022	0.841607	0.940385	0.00240298	-0.023 to 0.022	0.0999687	0.033 to 0.167	0.00342805	0.0079885	0.102322	0.017 to 0.16
LPE(18:0) [sn2]		-0.00318184	-0.024 to 0.018	0.763871	0.91185	-0.00231538	-0.028 to 0.019	0.0991253	0.031 to 0.168	0.00470501	0.0105829	0.100212	0.028 to 0.169
LPE(18:1) [sn1]		0.00370988	-0.022 to 0.029	0.773606	0.91185	0.00391529	-0.023 to 0.032	0.0228375	-0.061 to 0.107	0.594005	0.676869	0.0228609	-0.062 to 0.101
LPE(18:1) [sn2]		0.000708444	-0.025 to 0.027	0.95731	0.983273	0.0013092	-0.027 to 0.029	0.0145385	-0.071 to 0.1	0.739029	0.807857	0.0155734	-0.071 to 0.098
LPE(18:2) [sn1]		-0.00603302	-0.033 to 0.021	0.656977	0.85972	-0.004981	-0.037 to 0.022	-0.0231779	-0.111 to 0.065	0.606134	0.689678	-0.0203793	-0.097 to 0.061
LPE(18:2) [sn2]		-0.0117964	-0.038 to 0.015	0.385736	0.722173	-0.0115769	-0.04 to 0.017	-0.0340538	-0.122 to 0.054	0.449278	0.546458	-0.0327006	-0.111 to 0.046
LPE(20:4) [sn1]		-0.00207393	-0.028 to 0.024	0.877005	0.955132	-0.00255171	-0.029 to 0.035	0.143926	0.056 to 0.231	0.00134304	0.00348562	0.145382	0.052 to 0.251
LPE(20:4) [sn2]		-0.00706554	-0.033 to 0.019	0.593167	0.828141	-0.00736472	-0.036 to 0.029	0.120969	0.033 to 0.209	0.00713943	0.0153894	0.121605	0.026 to 0.218
LPE(22:6) [sn1]		-0.0266747	-0.052 to -0.001	0.0429685	0.343406	-0.0278461	-0.052 to 0.006	0.056605	-0.029 to 0.143	0.198039	0.275904	0.0551204	-0.034 to 0.147
LPE(22:6) [sn2]		-0.0258657	-0.052 to 0	0.0494664	0.359736	-0.0258829	-0.053 to 0.005	0.0833238	-0.003 to 0.17	0.0590736	0.0981608	0.0865048	-0.01 to 0.167
LPE(P-16:0)		-0.0191456	-0.037 to -0.001	0.0366739	0.317409	-0.0181444	-0.042 to -0.001	-0.0300165	-0.089 to 0.029	0.318748	0.415711	-0.0296591	-0.091 to 0.026
LPE(P-18:0)		-0.0183533	-0.037 to 0	0.0537223	0.359736	-0.0175692	-0.041 to 0	-0.0228802	-0.084 to 0.039	0.466917	0.564374	-0.0232298	-0.082 to 0.034
LPE(P-18:1)		-0.0161556	-0.034 to 0.002	0.0837147	0.401314	-0.0156893	-0.036 to 0.003	-0.0212208	-0.082 to 0.04	0.494116	0.590668	-0.0198159	-0.08 to 0.035
LPE(P-20:0)		-0.00785471	-0.029 to 0.013	0.468101	0.760149	-0.00685296	-0.032 to 0.013	-0.0326829	-0.102 to 0.037	0.357297	0.454917	-0.0298863	-0.099 to 0.028
PI (38:5) (b)		0.0197795	-0.006 to 0.046	0.139542	0.463077	0.0194216	-0.005 to 0.044	0.0249554	-0.063 to 0.113	0.57697	0.666263	0.0269676	-0.067 to 0.12
PI(15-MHDA_20:4)\PI(17:0_20:4)		0.0115366	-0.015 to 0.038	0.386568	0.722173	0.01102	-0.012 to 0.035	0.0163623	-0.071 to 0.104	0.715173	0.790561	0.0192077	-0.089 to 0.103
PI(16:0_16:1)		0.0108899	-0.015 to 0.037	0.406277	0.727276	0.0111364	-0.014 to 0.037	0.112605	0.025 to 0.2	0.0116971	0.0238454	0.115195	0.013 to 0.207
PI(16:0_20:3) (a)		0.0173635	-0.01 to 0.044	0.205888	0.576784	0.0163072	-0.008 to 0.042	0.0787498	-0.01 to 0.167	0.0812102	0.129403	0.0799174	-0.015 to 0.171
PI(16:0_20:3) (b)		0.0193597	-0.007 to 0.045	0.145625	0.465042	0.0199626	-0.008 to 0.046	0.0404516	-0.047 to 0.128	0.366142	0.460496	0.041131	-0.064 to 0.143
PI(16:0_20:4)		0.000422088	-0.026 to 0.027	0.975384	0.987228	0.000523167	-0.024 to 0.03	0.0715088	-0.017 to 0.16	0.112472	0.170353	0.0736515	-0.026 to 0.168
PI(16:0/16:0)		0.00644958	-0.02 to 0.033	0.628661	0.84009	0.00625498	-0.019 to 0.03	0.0817073	-0.007 to 0.17	0.0702022	0.113258	0.0800643	-0.009 to 0.183
PI(17:0_18:1)		0.0216521	-0.005 to 0.048	0.105824	0.423296	0.022231	-0.003 to 0.045	0.0700131	-0.018 to 0.158	0.119218	0.177228	0.0698561	-0.031 to 0.168
PI(17:0_18:2)		0.0285694	0.002 to 0.055	0.0337009	0.317409	0.0292144	0.005 to 0.051	0.201212	0.114 to 0.288	7.28902e-06	3.44895e-05	0.20427	0.106 to 0.287
PI(18:0_18:1)		0.00493128	-0.021 to 0.031	0.712563	0.896113	0.00440209	-0.019 to 0.03	0.0115225	-0.076 to 0.099	0.797276	0.850483	0.0118541	-0.079 to 0.103
PI(18:0_20:2)		-0.00178936	-0.028 to 0.025	0.895357	0.969033	-0.00185153	-0.026 to 0.02	-0.119181	-0.207 to -0.032	0.00784256	0.0166735	-0.118454	-0.209 to -0.038
PI(18:0_20:3) (a)		0.0159746	-0.01 to 0.042	0.235491	0.615289	0.0161944	-0.011 to 0.043	-0.0806099	-0.169 to 0.007	0.0731166	0.117228	-0.0768879	-0.172 to 0.004
PI(18:0_20:3) (b)		0.00636162	-0.019 to 0.032	0.62507	0.84009	0.00556967	-0.02 to 0.034	-0.107279	-0.193 to -0.022	0.0141451	0.0279927	-0.10576	-0.208 to -0.01
PI(18:0_20:4)		-0.0125943	-0.039 to 0.014	0.347022	0.704945	-0.0123519	-0.037 to 0.014	-0.0846397	-0.171 to 0.002	0.0560662	0.0937659	-0.0828779	-0.174 to -0.001
PI(18:0_22:4)		0.00294453	-0.023 to 0.029	0.822355	0.927679	0.00382943	-0.022 to 0.026	-0.0131817	-0.101 to 0.074	0.768137	0.826732	-0.00920357	-0.115 to 0.079
PI(18:0_22:5) (n3)		-0.0163949	-0.042 to 0.009	0.211472	0.577792	-0.016979	-0.042 to 0.01	0.0392249	-0.049 to 0.127	0.383808	0.479606	0.0401227	-0.053 to 0.13
PI(18:0_22:5) (n6)		0.00827704	-0.017 to 0.034	0.528238	0.790989	0.00788182	-0.016 to 0.035	-0.00355293	-0.092 to 0.085	0.937042	0.949275	-0.00335114	-0.086 to 0.088
PI(18:0_22:6)		-0.0141202	-0.039 to 0.011	0.275993	0.649412	-0.0148115	-0.038 to 0.007	0.184342	0.099 to 0.27	2.8607e-05	0.000113841	0.185302	0.094 to 0.273
PI(18:1_18:2)		0.0100691	-0.016 to 0.036	0.44291	0.748556	0.0105002	-0.016 to 0.036	0.0727157	-0.015 to 0.16	0.104396	0.160737	0.0734714	-0.002 to 0.164
PI(20:0_20:4)		-0.00299076	-0.029 to 0.023	0.823674	0.927679	-0.00282173	-0.027 to 0.021	-0.0188661	-0.106 to 0.068	0.671762	0.752218	-0.0172616	-0.104 to 0.069
PI(34:0)		0.00201557	-0.024 to 0.028	0.880022	0.956438	0.00146481	-0.02 to 0.031	0.080857	-0.007 to 0.169	0.0718184	0.115625	0.0824089	-0.014 to 0.164
PI(34:1)		0.0112831	-0.015 to 0.037	0.397865	0.722173	0.0118116	-0.017 to 0.036	0.0965851	0.009 to 0.184	0.0315017	0.0570443	0.0996012	0.001 to 0.186
PI(36:2)		0.012697	-0.014 to 0.039	0.344213	0.704945	0.0118662	-0.01 to 0.039	0.216792	0.131 to 0.303	1.06768e-06	6.62813e-06	0.216304	0.132 to 0.297
PI(37:6)		-0.0299202	-0.056 to -0.004	0.0256076	0.310492	-0.0300948	-0.06 to -0.004	-0.252916	-0.339 to -0.167	1.44329e-08	1.62317e-07	-0.251711	-0.344 to -0.164
PI(38:5) (a)		0.00540617	-0.021 to 0.032	0.693291	0.884858	0.00497589	-0.021 to 0.036	0.114318	0.026 to 0.202	0.0111725	0.0230581	0.11931	0.007 to 0.222
PI(38:6)		-0.00653145	-0.033 to 0.019	0.622935	0.84009	-0.00649904	-0.032 to 0.018	0.221283	0.136 to 0.306	4.72293e-07	3.55824e-06	0.223716	0.132 to 0.316
PI(39:6)		0.00192753	-0.024 to 0.028	0.883545	0.958924	0.0020469	-0.021 to 0.024	0.137136	0.05 to 0.224	0.00205304	0.00504163	0.140634	0.038 to 0.221
PIP1(38:4)		-0.000127228	-0.024 to 0.024	0.991684	0.994247	-0.000139749	-0.023 to 0.024	-0.0464402	-0.125 to 0.032	0.248508	0.332487	-0.0454669	-0.136 to 0.028
LPI(18:0) [sn1]		-0.0122167	-0.038 to 0.013	0.346864	0.704945	-0.0119429	-0.036 to 0.012	0.0317033	-0.053 to 0.117	0.465511	0.563551	0.0326514	-0.058 to 0.116
LPI(18:0) [sn2]		-0.00226548	-0.028 to 0.023	0.862883	0.948438	-0.00235892	-0.027 to 0.023	-0.0427074	-0.13 to 0.044	0.336453	0.432981	-0.0431402	-0.142 to 0.044
LPI(18:1) [sn1]		-0.005107	-0.03 to 0.02	0.688301	0.879936	-0.00540811	-0.032 to 0.02	0.0118394	-0.073 to 0.096	0.783567	0.841604	0.0124083	-0.075 to 0.095
LPI(18:1) [sn2]		0.00104935	-0.025 to 0.027	0.936323	0.980047	0.000999318	-0.028 to 0.027	0.0903099	0.004 to 0.176	0.0403878	0.0698015	0.0910342	-0.006 to 0.174
LPI(18:2) [sn1]		0.0146756	-0.011 to 0.041	0.266329	0.64004	0.0150789	-0.011 to 0.042	0.192617	0.109 to 0.277	8.66454e-06	3.95511e-05	0.194261	0.112 to 0.272
LPI(18:2) [sn2]		0.0103276	-0.016 to 0.036	0.438447	0.747528	0.00930695	-0.015 to 0.038	0.191511	0.106 to 0.277	1.4887e-05	6.27842e-05	0.190675	0.106 to 0.282
LPI(20:4) [sn1]		-0.00207727	-0.028 to 0.024	0.874083	0.955132	-0.0017903	-0.027 to 0.029	0.0858275	0.001 to 0.171	0.0477948	0.081335	0.08644	-0.001 to 0.175
LPI(20:4) [sn2]		-0.00336514	-0.029 to 0.023	0.79963	0.921805	-0.00371225	-0.028 to 0.022	0.0146294	-0.072 to 0.101	0.739722	0.807857	0.0157676	-0.069 to 0.095
PS(36:1)		0.00651136	-0.013 to 0.026	0.518593	0.790297	0.00707088	-0.013 to 0.026	0.19638	0.135 to 0.258	9.10572e-10	1.50341e-08	0.197173	0.133 to 0.263
PS(36:2)		0.013762	-0.005 to 0.033	0.152979	0.477652	0.0133277	-0.008 to 0.031	0.182526	0.123 to 0.242	4.48734e-09	6.21817e-08	0.18097	0.123 to 0.248
PS(38:3)		0.00458735	-0.015 to 0.024	0.648085	0.849517	0.00466321	-0.018 to 0.023	0.131214	0.068 to 0.194	5.41604e-05	0.000201093	0.130641	0.061 to 0.201
PS(38:4)		-0.00680292	-0.026 to 0.012	0.483194	0.765859	-0.00644499	-0.027 to 0.011	0.0813619	0.02 to 0.143	0.0102125	0.0213036	0.080936	0.006 to 0.137
PS(38:5)		-0.00807739	-0.028 to 0.012	0.431327	0.747528	-0.0073625	-0.031 to 0.011	0.0753858	0.011 to 0.14	0.0219276	0.0415021	0.0751956	0.005 to 0.134
PS(40:5)		-0.00465997	-0.026 to 0.016	0.662686	0.862826	-0.00481806	-0.028 to 0.015	0.0757675	0.007 to 0.145	0.0318786	0.0573963	0.0747425	-0.003 to 0.145
PS(40:6)		-0.00526012	-0.028 to 0.017	0.647293	0.849517	-0.00454926	-0.029 to 0.014	0.0427849	-0.033 to 0.119	0.269926	0.357081	0.0430321	-0.057 to 0.116
PG(34:1)		0.015012	-0.011 to 0.041	0.266408	0.64004	0.0142402	-0.01 to 0.046	0.159773	0.073 to 0.246	0.000324458	0.000979687	0.160092	0.063 to 0.256
PG(36:1)		0.000514878	-0.026 to 0.027	0.969107	0.987228	0.000561434	-0.024 to 0.026	0.169148	0.083 to 0.255	0.000133371	0.000453931	0.17295	0.066 to 0.255
PG(36:2)		0.0262111	0 to 0.052	0.0499413	0.359736	0.0268177	-0.002 to 0.049	0.278078	0.194 to 0.362	2.05403e-10	3.88762e-09	0.280472	0.184 to 0.373
CE(14:0)		-0.0266328	-0.053 to -0.001	0.0455724	0.353642	-0.0267062	-0.051 to -0.004	-0.224441	-0.31 to -0.139	3.59057e-07	2.73165e-06	-0.224135	-0.308 to -0.144
CE(15:0)		-0.0295367	-0.056 to -0.004	0.0264064	0.314949	-0.0298127	-0.056 to 0	-0.270307	-0.354 to -0.187	4.83289e-10	8.52346e-09	-0.272346	-0.341 to -0.181
CE(16:0)		-0.0263233	-0.053 to 0	0.0515111	0.359736	-0.0266273	-0.051 to -0.003	-0.0349401	-0.123 to 0.053	0.436952	0.533975	-0.0352497	-0.131 to 0.053
CE(16:1)		-0.023368	-0.049 to 0.002	0.0714428	0.384997	-0.0236699	-0.049 to 0.002	-0.185003	-0.27 to -0.1	2.4595e-05	9.88899e-05	-0.185115	-0.271 to -0.094
CE(16:2)		-0.0332772	-0.059 to -0.007	0.013101	0.275101	-0.0331682	-0.061 to -0.004	-0.358615	-0.44 to -0.277	7.9554e-17	1.54335e-14	-0.358265	-0.446 to -0.281
CE(17:0)		-0.0149635	-0.041 to 0.011	0.251553	0.632358	-0.0147334	-0.039 to 0.01	-0.0593242	-0.146 to 0.028	0.181781	0.255085	-0.0588044	-0.141 to 0.037
CE(17:1)		-0.0191814	-0.045 to 0.006	0.143499	0.463581	-0.0198929	-0.044 to 0.005	-0.215666	-0.301 to -0.131	8.68194e-07	5.70948e-06	-0.217985	-0.297 to -0.131
CE(18:0)		-0.0162728	-0.042 to 0.01	0.219864	0.586305	-0.0154965	-0.042 to 0.004	-0.00411083	-0.092 to 0.084	0.926812	0.94384	-0.000274373	-0.105 to 0.076
CE(18:1)		-0.0125402	-0.038 to 0.013	0.34375	0.704945	-0.0125724	-0.039 to 0.01	-0.0531138	-0.14 to 0.034	0.232829	0.314218	-0.0520656	-0.143 to 0.05
CE(18:2)		-0.0252726	-0.052 to 0.002	0.0665617	0.38107	-0.0247091	-0.056 to 0	-0.239092	-0.325 to -0.153	7.20761e-08	6.71813e-07	-0.240136	-0.329 to -0.151
CE(18:3)		-0.0260832	-0.053 to 0.001	0.0554558	0.363319	-0.0244599	-0.056 to 0.002	-0.25119	-0.335 to -0.168	6.99773e-09	8.75845e-08	-0.253333	-0.337 to -0.173
CE(20:0)		-0.0194448	-0.045 to 0.006	0.133991	0.463077	-0.0199147	-0.044 to 0.005	0.0646846	-0.022 to 0.151	0.142523	0.2075	0.0654611	-0.017 to 0.147
CE(20:1)		-0.00957289	-0.036 to 0.017	0.478327	0.763749	-0.0102285	-0.035 to 0.017	0.0363657	-0.051 to 0.124	0.416264	0.513546	0.0384575	-0.068 to 0.116
CE(20:2)		0.0040178	-0.022 to 0.03	0.763703	0.91185	0.00343822	-0.019 to 0.031	0.0539247	-0.033 to 0.141	0.223293	0.305062	0.0527699	-0.032 to 0.148
CE(20:3)		0.00315355	-0.023 to 0.029	0.811222	0.925748	0.00277899	-0.026 to 0.031	-0.138856	-0.225 to -0.052	0.00171906	0.00430319	-0.136495	-0.216 to -0.054
CE(20:4)		-0.0324824	-0.058 to -0.007	0.0134703	0.275101	-0.0326721	-0.061 to -0.006	-0.323705	-0.407 to -0.241	1.17142e-13	1.01317e-11	-0.323933	-0.415 to -0.24
CE(20:5)		-0.025194	-0.05 to 0	0.0509135	0.359736	-0.0257633	-0.05 to 0.002	-0.284549	-0.368 to -0.201	5.07997e-11	1.23189e-09	-0.282719	-0.377 to -0.203
CE(22:0)		0.00129737	-0.024 to 0.027	0.92136	0.976742	0.000841384	-0.023 to 0.03	0.0836926	-0.004 to 0.171	0.060566	0.100212	0.0847066	0.006 to 0.163
CE(22:1)		-0.0158259	-0.042 to 0.01	0.236981	0.617105	-0.0159073	-0.043 to 0.011	0.0739266	-0.013 to 0.161	0.0969547	0.151078	0.0748065	-0.018 to 0.154
CE(22:4)		-0.0152688	-0.042 to 0.011	0.255976	0.635672	-0.0154762	-0.044 to 0.01	-0.169617	-0.256 to -0.083	0.000137493	0.000465713	-0.170118	-0.268 to -0.064
CE(22:5) (n3)		-0.0413143	-0.067 to -0.016	0.00149177	0.105238	-0.0427094	-0.068 to -0.016	-0.275774	-0.359 to -0.192	2.23014e-10	4.0353e-09	-0.273204	-0.376 to -0.2
CE(22:5) (n6)		-0.0217022	-0.048 to 0.004	0.103556	0.420731	-0.0220687	-0.049 to 0.007	-0.278137	-0.362 to -0.194	2.23606e-10	4.0353e-09	-0.277773	-0.367 to -0.188
CE(22:6)		-0.043236	-0.069 to -0.018	0.000890568	0.0863851	-0.0444474	-0.069 to -0.018	-0.289528	-0.374 to -0.205	4.30175e-11	1.11272e-09	-0.289089	-0.374 to -0.206
CE(24:0)		-0.0101083	-0.036 to 0.015	0.439428	0.747528	-0.0113357	-0.033 to 0.017	0.0245692	-0.063 to 0.112	0.583345	0.66865	0.0236715	-0.055 to 0.11
CE(24:1)		-0.00551506	-0.032 to 0.021	0.678478	0.873133	-0.00601339	-0.031 to 0.021	0.0720292	-0.015 to 0.159	0.106445	0.163003	0.0708798	-0.009 to 0.174
CE(24:4)		-0.0076023	-0.034 to 0.019	0.569969	0.8146	-0.00805794	-0.036 to 0.021	-0.075646	-0.164 to 0.013	0.0932482	0.145888	-0.0756998	-0.168 to 0.032
CE(24:5)		-0.0413283	-0.068 to -0.015	0.00208226	0.107722	-0.04129	-0.065 to -0.019	-0.235053	-0.321 to -0.149	1.20035e-07	1.01247e-06	-0.235787	-0.322 to -0.136
CE(24:6)		-0.0127437	-0.039 to 0.013	0.334923	0.70054	-0.0129327	-0.037 to 0.018	-0.17133	-0.256 to -0.086	8.823e-05	0.000308408	-0.17253	-0.263 to -0.095
COH		-0.0100879	-0.036 to 0.016	0.44756	0.748556	-0.0100897	-0.036 to 0.013	0.0451314	-0.043 to 0.133	0.31716	0.414337	0.0461443	-0.041 to 0.137
DE(16:0)		-0.0346645	-0.061 to -0.009	0.00931241	0.267645	-0.034354	-0.059 to -0.008	-0.220778	-0.306 to -0.136	4.8317e-07	3.60519e-06	-0.221746	-0.309 to -0.139
DE(18:1)		-0.0326484	-0.058 to -0.007	0.013175	0.275101	-0.0335167	-0.06 to -0.006	-0.316297	-0.4 to -0.233	5.46056e-13	3.02671e-11	-0.316954	-0.399 to -0.24
DE(18:2)		-0.0515222	-0.078 to -0.025	0.000130508	0.0844757	-0.0504693	-0.078 to -0.026	-0.394915	-0.475 to -0.315	1.95828e-20	1.51962e-17	-0.394759	-0.483 to -0.314
DE(20:4)		-0.0393995	-0.065 to -0.014	0.00285143	0.125524	-0.0403918	-0.068 to -0.013	-0.372205	-0.454 to -0.29	8.17019e-18	3.17003e-15	-0.372673	-0.463 to -0.28
DE(20:5)		-0.0317562	-0.057 to -0.006	0.0157925	0.281362	-0.0319326	-0.059 to 0.001	-0.251202	-0.336 to -0.167	9.42957e-09	1.14334e-07	-0.25143	-0.33 to -0.169
DE(22:6)		-0.0387005	-0.064 to -0.014	0.00268572	0.125524	-0.0396688	-0.066 to -0.016	-0.333518	-0.417 to -0.251	2.047e-14	2.26924e-12	-0.333323	-0.414 to -0.251
FA(14:0)		-0.0120664	-0.035 to 0.011	0.305287	0.684345	-0.0112521	-0.032 to 0.007	-0.0675637	-0.142 to 0.007	0.0758157	0.121305	-0.0688118	-0.138 to 0.008
FA(15:0)		-0.00587812	-0.03 to 0.018	0.634669	0.843327	-0.0057332	-0.029 to 0.014	0.00692575	-0.073 to 0.087	0.865074	0.898658	0.0064242	-0.066 to 0.085
FA(16:0)		-0.00551015	-0.026 to 0.015	0.595493	0.828141	-0.00551636	-0.023 to 0.014	-0.0597338	-0.127 to 0.008	0.0841532	0.13345	-0.0593417	-0.124 to 0.002
FA(16:1)		0.00407031	-0.019 to 0.028	0.733957	0.903881	0.00376003	-0.019 to 0.027	-0.0613153	-0.137 to 0.015	0.114822	0.172407	-0.0620926	-0.139 to 0.01
FA(16:2)		-0.014417	-0.041 to 0.012	0.283145	0.65393	-0.0137176	-0.041 to 0.011	0.0409651	-0.046 to 0.128	0.357066	0.454917	0.0422602	-0.054 to 0.123
FA(17:0)		-0.0111271	-0.037 to 0.014	0.392915	0.722173	-0.0111204	-0.036 to 0.015	-0.0781739	-0.162 to 0.006	0.069605	0.113094	-0.0781821	-0.161 to 0.003
FA(17:1)		0.00631255	-0.018 to 0.031	0.613598	0.835914	0.0064391	-0.016 to 0.031	-0.0575645	-0.137 to 0.022	0.155549	0.223529	-0.0571534	-0.139 to 0.019
FA(18:0)		-0.0119648	-0.039 to 0.015	0.377978	0.722173	-0.0124293	-0.034 to 0.015	-0.0901935	-0.178 to -0.003	0.0438181	0.0750615	-0.0897808	-0.167 to -0.01
FA(18:1)		0.00389366	-0.018 to 0.026	0.729164	0.903881	0.00344211	-0.016 to 0.027	-0.0734786	-0.147 to 0	0.0516127	0.0867058	-0.0749437	-0.139 to 0.003
FA(18:2)		0.00120621	-0.019 to 0.022	0.909064	0.974317	0.00122229	-0.018 to 0.021	-0.0298616	-0.1 to 0.041	0.407431	0.504253	-0.0294717	-0.098 to 0.033
FA(18:3)		0.00689171	-0.014 to 0.028	0.519398	0.790297	0.00725456	-0.014 to 0.028	-0.0360628	-0.108 to 0.036	0.326604	0.422408	-0.0346558	-0.101 to 0.03
FA(20:2)		-0.0112778	-0.035 to 0.012	0.352141	0.709204	-0.0125176	-0.035 to 0.017	-0.117883	-0.198 to -0.037	0.00423069	0.00962761	-0.118832	-0.203 to -0.04
FA(20:3)		-0.00580882	-0.03 to 0.018	0.631955	0.841172	-0.00589266	-0.031 to 0.017	-0.0962689	-0.176 to -0.017	0.0180015	0.0348359	-0.0946255	-0.175 to -0.02
FA(20:4)		-0.0225142	-0.047 to 0.001	0.0664132	0.38107	-0.0235678	-0.046 to 0.004	-0.0636391	-0.145 to 0.018	0.126742	0.18557	-0.063165	-0.151 to 0.011
FA(20:5)		-0.0165784	-0.042 to 0.009	0.207197	0.577643	-0.0165197	-0.04 to 0.01	-0.0971097	-0.182 to -0.012	0.0258856	0.0486374	-0.100989	-0.189 to -0.004
FA(22:4)		-0.0121786	-0.036 to 0.012	0.325395	0.691909	-0.0126419	-0.036 to 0.012	-0.13743	-0.219 to -0.056	0.000981923	0.00262749	-0.135792	-0.221 to -0.068
FA(22:5)		-0.0149617	-0.038 to 0.008	0.201743	0.572807	-0.0156744	-0.039 to 0.016	-0.159627	-0.237 to -0.083	5.54565e-05	0.000203954	-0.158328	-0.239 to -0.084
FA(22:6)		-0.0255529	-0.048 to -0.003	0.0281398	0.31647	-0.0253392	-0.047 to -0.003	-0.156991	-0.233 to -0.081	6.09872e-05	0.000220121	-0.154531	-0.245 to -0.085
AC(12:0)		-0.00772864	-0.033 to 0.018	0.551541	0.803522	-0.00761556	-0.033 to 0.018	-0.0794872	-0.165 to 0.006	0.0699236	0.113146	-0.0809541	-0.174 to 0.006
AC(13:0)		-0.0126109	-0.039 to 0.013	0.342037	0.704945	-0.0126369	-0.041 to 0.014	-0.0548661	-0.142 to 0.033	0.220276	0.301472	-0.0509117	-0.141 to 0.023
AC(14:0)		-0.0269701	-0.048 to -0.006	0.0116594	0.275101	-0.0263119	-0.047 to -0.006	-0.122543	-0.191 to -0.054	0.000489918	0.00140286	-0.123426	-0.183 to -0.052
AC(14:1)		-0.000380399	-0.026 to 0.025	0.976627	0.987228	-0.00140312	-0.028 to 0.027	-0.0520397	-0.138 to 0.034	0.237425	0.319309	-0.0509062	-0.134 to 0.039
AC(14:2)		-9.08524e-05	-0.026 to 0.025	0.994417	0.9957	-0.000233427	-0.027 to 0.024	-0.0253931	-0.112 to 0.061	0.565263	0.656653	-0.0229363	-0.124 to 0.07
AC(15:0) (a)		-0.0112811	-0.035 to 0.012	0.352139	0.709204	-0.0113588	-0.036 to 0.015	-0.0931564	-0.171 to -0.015	0.0191478	0.036962	-0.0902438	-0.18 to -0.021
AC(15:0) (b)		-0.0137793	-0.034 to 0.006	0.182939	0.539775	-0.0132738	-0.035 to 0.004	-0.094887	-0.161 to -0.029	0.00498005	0.0111369	-0.0951584	-0.157 to -0.026
AC(16:0)		-0.0149786	-0.032 to 0.002	0.0886469	0.401314	-0.0148263	-0.032 to 0.003	-0.125091	-0.181 to -0.069	1.51279e-05	6.34553e-05	-0.123657	-0.184 to -0.073
AC(16:1)		-0.0153595	-0.036 to 0.005	0.14457	0.463581	-0.0147099	-0.037 to 0.006	-0.101091	-0.168 to -0.034	0.00341584	0.007984	-0.10002	-0.164 to -0.032
AC(17:0) (a)		-0.0124601	-0.034 to 0.009	0.252617	0.632358	-0.0118001	-0.034 to 0.009	-0.10674	-0.176 to -0.037	0.00268289	0.00642568	-0.107146	-0.183 to -0.033
AC(17:0) (b)		-0.0101866	-0.031 to 0.01	0.327269	0.691991	-0.00992502	-0.031 to 0.007	-0.126426	-0.192 to -0.061	0.000182156	0.000591436	-0.124043	-0.195 to -0.065
AC(18:0)		-0.0193769	-0.038 to 0	0.0464645	0.356994	-0.0190269	-0.039 to 0	-0.146742	-0.208 to -0.085	4.03325e-06	2.04562e-05	-0.145207	-0.221 to -0.083
AC(18:1)		-0.0107892	-0.027 to 0.005	0.184024	0.54092	-0.0105677	-0.033 to 0.006	-0.0824346	-0.134 to -0.03	0.00199088	0.00490452	-0.0828425	-0.131 to -0.038
AC(18:2)		-0.00519113	-0.02 to 0.01	0.491425	0.770396	-0.00491776	-0.024 to 0.011	-0.0836345	-0.133 to -0.035	0.000870929	0.00234667	-0.0818605	-0.128 to -0.04
DG(14:0_16:0)		0.00439832	-0.022 to 0.031	0.745543	0.910634	0.0044726	-0.022 to 0.034	0.122083	0.035 to 0.209	0.00617163	0.0135671	0.121473	0.042 to 0.214
DG(14:0_18:2)		0.0157103	-0.011 to 0.042	0.2419	0.617481	0.0158376	-0.013 to 0.044	0.190711	0.105 to 0.276	1.52812e-05	6.3754e-05	0.188432	0.111 to 0.273
DG(16:0_16:0)		0.00719897	-0.019 to 0.033	0.586619	0.826132	0.00697209	-0.018 to 0.035	0.184194	0.099 to 0.269	2.58533e-05	0.000103413	0.184435	0.096 to 0.267
DG(16:0_16:1)		0.0064671	-0.02 to 0.033	0.631963	0.841172	0.00654317	-0.022 to 0.036	0.164702	0.077 to 0.253	0.000262825	0.000819085	0.165848	0.077 to 0.265
DG(16:0_18:1)		0.0111694	-0.014 to 0.037	0.392426	0.722173	0.0110142	-0.017 to 0.038	0.258883	0.177 to 0.341	1.47634e-09	2.33804e-08	0.258089	0.177 to 0.348
DG(16:0_18:2)		0.0135357	-0.012 to 0.039	0.294705	0.672621	0.0141406	-0.015 to 0.037	0.298555	0.217 to 0.38	2.83704e-12	1.15871e-10	0.299187	0.226 to 0.37
DG(16:0_20:4)		0.000629295	-0.024 to 0.025	0.960145	0.983273	0.0003593	-0.026 to 0.029	0.225998	0.144 to 0.308	1.04451e-07	9.10721e-07	0.226407	0.142 to 0.32
DG(16:0_22:5)		-0.00947278	-0.035 to 0.016	0.474744	0.763497	-0.00907027	-0.035 to 0.018	0.183646	0.098 to 0.269	3.08499e-05	0.000120907	0.184103	0.096 to 0.274
DG(16:0_22:6)		-0.0214027	-0.046 to 0.004	0.092719	0.401314	-0.0214779	-0.048 to 0.003	0.155063	0.072 to 0.238	0.000261093	0.00081744	0.154753	0.081 to 0.241
DG(16:1_18:1)		0.0216031	-0.005 to 0.048	0.108498	0.429551	0.0213124	-0.005 to 0.053	0.235376	0.149 to 0.322	1.34135e-07	1.10732e-06	0.235257	0.14 to 0.32
DG(18:0_18:1)		0.0243836	-0.002 to 0.05	0.0676313	0.38107	0.0244099	-0.004 to 0.052	0.291769	0.209 to 0.374	1.36548e-11	4.37045e-10	0.292203	0.21 to 0.376
DG(18:0_18:2)		0.0228321	-0.003 to 0.048	0.0810369	0.400539	0.0237205	-0.004 to 0.049	0.313826	0.232 to 0.395	1.97282e-13	1.53091e-11	0.31647	0.228 to 0.389
DG(18:0_20:4)		0.00499228	-0.016 to 0.026	0.646827	0.849517	0.00565406	-0.019 to 0.026	0.255198	0.188 to 0.322	3.43972e-13	2.22435e-11	0.256319	0.19 to 0.329
DG(18:0_22:6)		-0.00817964	-0.034 to 0.018	0.541924	0.800261	-0.00847412	-0.037 to 0.021	0.0731206	-0.014 to 0.161	0.102523	0.158482	0.0753846	-0.005 to 0.148
DG(18:1_18:1)		0.0253628	-0.001 to 0.052	0.0631231	0.38107	0.0254668	-0.005 to 0.051	0.302001	0.218 to 0.386	5.49319e-12	2.02986e-10	0.304556	0.215 to 0.386
DG(18:1_18:2)		0.0254333	-0.001 to 0.052	0.0571198	0.363319	0.0253541	-0.001 to 0.049	0.313514	0.23 to 0.397	6.9212e-13	3.58057e-11	0.316725	0.223 to 0.383
DG(18:1_18:3)		0.0282435	0.002 to 0.054	0.033456	0.317409	0.0279284	0.002 to 0.053	0.271834	0.187 to 0.356	5.84058e-10	1.00717e-08	0.271699	0.197 to 0.356
DG(18:1_20:3)		0.0300527	0.005 to 0.055	0.0210167	0.285648	0.030142	0.002 to 0.054	0.184937	0.101 to 0.269	2.08203e-05	8.41488e-05	0.185472	0.091 to 0.27
DG(18:1_20:4)		0.018372	-0.007 to 0.043	0.151657	0.477379	0.0184003	-0.007 to 0.044	0.298262	0.218 to 0.378	1.0502e-12	4.79386e-11	0.30107	0.217 to 0.375
DG(18:1_20:5)		0.008313	-0.017 to 0.033	0.515739	0.790297	0.00875622	-0.015 to 0.032	0.168226	0.085 to 0.251	8.28699e-05	0.00029364	0.168549	0.077 to 0.255
DG(18:1_22:5)		0.00363772	-0.021 to 0.029	0.774687	0.91185	0.00333534	-0.023 to 0.029	0.239132	0.157 to 0.321	1.92579e-08	2.1048e-07	0.237888	0.155 to 0.328
DG(18:1_22:6)		-0.0111615	-0.036 to 0.014	0.383017	0.722173	-0.0106832	-0.035 to 0.014	0.184479	0.102 to 0.267	1.30663e-05	5.60192e-05	0.185675	0.104 to 0.267
DG(18:2_18:2)		0.0121886	-0.014 to 0.038	0.356592	0.715028	0.0124657	-0.012 to 0.036	0.242965	0.158 to 0.328	3.90444e-08	3.93487e-07	0.243655	0.17 to 0.336
DG(18:2_20:4)		0.0115726	-0.013 to 0.036	0.360965	0.719227	0.0115582	-0.014 to 0.037	0.243969	0.162 to 0.326	9.16584e-09	1.129e-07	0.243612	0.165 to 0.317
DG(18:2_22:6)		-0.0138634	-0.039 to 0.011	0.278307	0.649412	-0.0138996	-0.041 to 0.012	0.179685	0.098 to 0.262	2.07255e-05	8.41488e-05	0.182867	0.094 to 0.254
TG(48:0) [SIM]		-0.00117238	-0.028 to 0.025	0.931066	0.980047	-0.000714676	-0.031 to 0.024	0.0464425	-0.042 to 0.135	0.302155	0.396069	0.046486	-0.045 to 0.128
TG(48:1) [SIM]		-0.00326521	-0.03 to 0.023	0.807452	0.924896	-0.00289358	-0.029 to 0.025	0.0385403	-0.049 to 0.126	0.390234	0.485291	0.0400366	-0.056 to 0.13
TG(48:2) [SIM]		0.0108532	-0.016 to 0.037	0.421145	0.742747	0.0113288	-0.017 to 0.038	0.140921	0.054 to 0.228	0.00156565	0.00398403	0.141901	0.049 to 0.231
TG(48:3) [SIM]		0.023143	-0.003 to 0.05	0.0885401	0.401314	0.0223616	-0.004 to 0.052	0.17683	0.09 to 0.264	7.38272e-05	0.000262798	0.180007	0.083 to 0.259
TG(49:1) [SIM]		-0.00343365	-0.03 to 0.023	0.800031	0.921805	-0.00254174	-0.03 to 0.02	0.0245991	-0.064 to 0.113	0.586323	0.670084	0.0250886	-0.08 to 0.114
TG(50:0) [SIM]		0.00681148	-0.02 to 0.033	0.614009	0.835914	0.0064202	-0.021 to 0.034	0.145422	0.058 to 0.233	0.00114889	0.0030428	0.143721	0.056 to 0.232
TG(50:1) [SIM]		0.00461734	-0.022 to 0.031	0.734986	0.903881	0.00413972	-0.02 to 0.03	0.125607	0.038 to 0.213	0.00500508	0.0111608	0.124102	0.041 to 0.21
TG(50:2) [SIM]		0.00774827	-0.019 to 0.034	0.567134	0.813487	0.00850171	-0.02 to 0.033	0.142946	0.056 to 0.23	0.00138976	0.0035829	0.145753	0.04 to 0.235
TG(50:3) [SIM]		0.0159765	-0.011 to 0.043	0.239066	0.617481	0.0155185	-0.008 to 0.043	0.211514	0.125 to 0.298	1.91401e-06	1.08414e-05	0.211873	0.123 to 0.304
TG(50:4) [SIM]		0.0198667	-0.006 to 0.046	0.140021	0.463077	0.0194673	-0.009 to 0.047	0.251058	0.166 to 0.336	1.40223e-08	1.62317e-07	0.253526	0.161 to 0.337
TG(51:0) [SIM]		-0.00786496	-0.034 to 0.019	0.562038	0.811835	-0.00782724	-0.033 to 0.023	-0.00993844	-0.098 to 0.078	0.824772	0.869597	-0.0081472	-0.091 to 0.071
TG(51:1) [SIM]		0.0103128	-0.016 to 0.037	0.444257	0.748556	0.0103825	-0.015 to 0.036	0.12468	0.037 to 0.212	0.00545744	0.0120999	0.125039	0.035 to 0.211
TG(51:2) [SIM]		0.0067711	-0.019 to 0.033	0.612726	0.835914	0.00640183	-0.015 to 0.033	0.145937	0.059 to 0.233	0.00107301	0.00285156	0.146127	0.048 to 0.243
TG(52:1) [SIM]		0.0136583	-0.013 to 0.04	0.310342	0.684345	0.0136912	-0.012 to 0.041	0.216858	0.131 to 0.303	9.56191e-07	6.11613e-06	0.216259	0.12 to 0.308
TG(52:2) [SIM]		0.0207084	-0.006 to 0.048	0.133892	0.463077	0.0200089	-0.006 to 0.045	0.216613	0.131 to 0.302	9.73704e-07	6.14304e-06	0.218889	0.126 to 0.299
TG(52:3) [SIM]		0.0208307	-0.006 to 0.048	0.129997	0.458452	0.0203674	-0.003 to 0.046	0.220725	0.135 to 0.306	6.20556e-07	4.26152e-06	0.221006	0.138 to 0.304
TG(52:4) [SIM]		0.0206023	-0.006 to 0.047	0.12544	0.455946	0.0210986	-0.007 to 0.045	0.285973	0.201 to 0.371	8.97596e-11	1.88253e-09	0.286544	0.198 to 0.363
TG(52:5) [SIM]		0.0198699	-0.006 to 0.046	0.135565	0.463077	0.0207726	-0.004 to 0.044	0.29856	0.214 to 0.383	1.18734e-11	4.00599e-10	0.299416	0.211 to 0.379
TG(53:2) [SIM]		0.0207037	-0.005 to 0.046	0.115848	0.44544	0.0206758	-0.002 to 0.047	0.229247	0.144 to 0.315	2.14574e-07	1.69908e-06	0.228152	0.132 to 0.322
TG(54:0) [SIM]		0.0152198	-0.011 to 0.042	0.260926	0.64004	0.0155692	-0.012 to 0.04	0.143335	0.056 to 0.231	0.00143153	0.00367837	0.145402	0.052 to 0.225
TG(54:1) [SIM]		0.0254556	-0.001 to 0.052	0.0577579	0.363393	0.0258799	0.001 to 0.053	0.214147	0.128 to 0.3	1.46174e-06	8.59324e-06	0.217455	0.123 to 0.295
TG(54:2) [SIM]		0.0294383	0.003 to 0.055	0.0271754	0.314949	0.02948	0.003 to 0.057	0.311806	0.229 to 0.395	8.39153e-13	4.06989e-11	0.313711	0.229 to 0.396
TG(54:3) [SIM]		0.0263803	0 to 0.053	0.0495186	0.359736	0.0264271	0.004 to 0.05	0.219312	0.133 to 0.306	8.66691e-07	5.70948e-06	0.220401	0.134 to 0.299
TG(54:4) [SIM]		0.0317415	0.006 to 0.058	0.0175082	0.281362	0.0326519	0.007 to 0.054	0.200319	0.114 to 0.287	7.58802e-06	3.54717e-05	0.198815	0.115 to 0.281
TG(54:5) [SIM]		0.0262652	0 to 0.052	0.048835	0.359736	0.0267961	0.002 to 0.05	0.219021	0.133 to 0.305	8.99046e-07	5.81383e-06	0.219014	0.144 to 0.299
TG(54:6) [SIM]		0.0144169	-0.011 to 0.04	0.274779	0.649412	0.0144182	-0.01 to 0.038	0.2291	0.143 to 0.315	2.87468e-07	2.23075e-06	0.228136	0.149 to 0.317
TG(54:7) [SIM]		0.0126937	-0.012 to 0.038	0.319233	0.689713	0.013086	-0.013 to 0.038	0.256062	0.171 to 0.341	6.59132e-09	8.38502e-08	0.254796	0.175 to 0.344
TG(56:6) [SIM]		0.000996805	-0.025 to 0.027	0.939209	0.980047	0.000913221	-0.022 to 0.026	0.202109	0.118 to 0.286	3.17651e-06	1.67685e-05	0.203018	0.113 to 0.284
TG(56:7) [SIM]		-0.014531	-0.04 to 0.011	0.262748	0.64004	-0.0144366	-0.041 to 0.009	0.200202	0.117 to 0.284	3.22689e-06	1.69194e-05	0.199306	0.112 to 0.284
TG(56:8) [SIM]		-0.00207555	-0.028 to 0.024	0.87457	0.955132	-0.00209657	-0.025 to 0.021	0.239148	0.155 to 0.323	3.62689e-08	3.75262e-07	0.241075	0.154 to 0.314
TG(56:9) [SIM]		0.0155339	-0.01 to 0.041	0.241367	0.617481	0.0157897	-0.011 to 0.039	0.209764	0.124 to 0.296	2.17579e-06	1.21468e-05	0.210409	0.124 to 0.288
TG(58:10) [SIM]		-0.00637688	-0.032 to 0.019	0.625112	0.84009	-0.00665889	-0.029 to 0.02	0.147183	0.062 to 0.232	0.000770511	0.00209795	0.149692	0.061 to 0.225
TG(58:8) [SIM]		-0.00813412	-0.034 to 0.017	0.532934	0.79448	-0.00753839	-0.033 to 0.016	0.15256	0.068 to 0.237	0.000460788	0.00133422	0.153882	0.063 to 0.234
TG(58:9) [SIM]		-0.00423987	-0.03 to 0.021	0.746681	0.910634	-0.00407592	-0.029 to 0.021	0.174502	0.089 to 0.26	6.66227e-05	0.000238696	0.17623	0.089 to 0.246
TG(48:0) [NL-16:0]		-0.00239909	-0.029 to 0.024	0.858855	0.94535	-0.00165677	-0.03 to 0.025	0.0619113	-0.026 to 0.15	0.168624	0.238346	0.0612665	-0.029 to 0.152
TG(48:0) [NL-18:0]		-0.00271489	-0.029 to 0.024	0.842226	0.940385	-0.00306918	-0.028 to 0.025	0.0172707	-0.071 to 0.105	0.701147	0.778488	0.0185823	-0.073 to 0.106
TG(48:1) [NL-16:1]		-0.00296045	-0.029 to 0.023	0.821994	0.927679	-0.00260474	-0.029 to 0.025	-0.014008	-0.103 to 0.075	0.756783	0.817916	-0.0120271	-0.099 to 0.08
TG(48:1) [NL-18:1]		-0.00345396	-0.03 to 0.023	0.796961	0.921805	-0.0024227	-0.032 to 0.021	0.0616591	-0.026 to 0.149	0.166974	0.236444	0.0601179	-0.038 to 0.151
TG(48:2) [NL-14:0]		0.0114809	-0.015 to 0.038	0.395089	0.722173	0.0111106	-0.017 to 0.04	0.160377	0.074 to 0.247	0.000315079	0.000955082	0.163243	0.057 to 0.247
TG(48:2) [NL-14:1]		0.000407272	-0.026 to 0.027	0.975852	0.987228	-4.52927e-05	-0.026 to 0.025	0.120622	0.033 to 0.209	0.00742382	0.0159581	0.119699	0.029 to 0.211
TG(48:2) [NL-16:1]		-0.00359097	-0.029 to 0.022	0.785806	0.919737	-0.00402466	-0.028 to 0.024	0.0411442	-0.047 to 0.129	0.360415	0.456251	0.0415536	-0.057 to 0.132
TG(48:2) [NL-18:2]		0.0113529	-0.015 to 0.038	0.402928	0.727276	0.011071	-0.016 to 0.037	0.161034	0.075 to 0.247	0.000274242	0.000844293	0.162492	0.06 to 0.244
TG(48:3) [NL-14:0]		0.0119595	-0.014 to 0.038	0.373516	0.719227	0.0120062	-0.013 to 0.039	0.177706	0.091 to 0.264	6.67489e-05	0.000238696	0.176665	0.088 to 0.268
TG(48:3) [NL-16:1]		0.00278395	-0.024 to 0.029	0.836744	0.938315	0.00324812	-0.024 to 0.028	0.119869	0.032 to 0.208	0.00757728	0.0161983	0.122653	0.033 to 0.2
TG(48:3) [NL-18:3]		0.0153264	-0.011 to 0.042	0.256398	0.635672	0.0154581	-0.013 to 0.045	0.15511	0.068 to 0.242	0.000522088	0.00148403	0.154966	0.062 to 0.243
TG(49:1) [NL-16:1]		0.000921627	-0.025 to 0.027	0.944963	0.981648	0.00140181	-0.027 to 0.026	-0.0714171	-0.16 to 0.017	0.115564	0.173124	-0.0696445	-0.156 to 0.02
TG(49:1) [NL-17:1]		0.000265043	-0.026 to 0.027	0.984335	0.990718	-0.000112544	-0.024 to 0.026	0.0445566	-0.044 to 0.133	0.323918	0.42041	0.0433649	-0.05 to 0.129
TG(50:0) [NL-18:0]		0.00820579	-0.018 to 0.035	0.543801	0.800739	0.00895014	-0.022 to 0.033	0.139509	0.052 to 0.227	0.00180328	0.00448508	0.139759	0.044 to 0.225
TG(50:1) [NL-14:0]		0.00400922	-0.023 to 0.031	0.768144	0.91185	0.003555	-0.021 to 0.029	0.0440583	-0.044 to 0.132	0.324623	0.420547	0.043276	-0.04 to 0.142
TG(50:1) [NL-16:0]		0.00876719	-0.018 to 0.036	0.520684	0.790297	0.00821635	-0.016 to 0.033	0.136242	0.049 to 0.223	0.00230473	0.00562412	0.136073	0.045 to 0.221
TG(50:1) [NL-18:1]		0.00341825	-0.023 to 0.03	0.802268	0.921805	0.00343193	-0.023 to 0.029	0.114133	0.027 to 0.202	0.010958	0.0226758	0.116244	0.031 to 0.196
TG(50:2) [NL-14:0]		0.0127291	-0.013 to 0.038	0.32904	0.693845	0.0125366	-0.015 to 0.038	0.13988	0.054 to 0.226	0.00156589	0.00398403	0.141416	0.055 to 0.237
TG(50:2) [NL-16:1]		0.00161867	-0.023 to 0.027	0.899493	0.970241	0.00180263	-0.023 to 0.025	0.0716654	-0.015 to 0.159	0.106498	0.163003	0.0697827	-0.026 to 0.164
TG(50:2) [NL-18:1]		0.00991424	-0.016 to 0.036	0.450635	0.748556	0.0103018	-0.019 to 0.034	0.108689	0.021 to 0.196	0.0149973	0.0293886	0.110676	0.017 to 0.2
TG(50:2) [NL-18:2]		0.00876116	-0.018 to 0.036	0.522763	0.790297	0.00902196	-0.019 to 0.035	0.145275	0.058 to 0.233	0.001202	0.00314057	0.146156	0.06 to 0.225
TG(50:3) [NL-14:0]		0.0118318	-0.014 to 0.038	0.378227	0.722173	0.0118707	-0.015 to 0.037	0.220841	0.135 to 0.306	5.78657e-07	4.04539e-06	0.222427	0.13 to 0.308
TG(50:3) [NL-14:1]		0.00712847	-0.019 to 0.033	0.594669	0.828141	0.00695908	-0.02 to 0.033	0.135518	0.048 to 0.223	0.00252801	0.00609236	0.137571	0.039 to 0.22
TG(50:3) [NL-16:1]		0.0131673	-0.012 to 0.038	0.308501	0.684345	0.0130714	-0.012 to 0.039	0.169714	0.084 to 0.255	0.000115127	0.000397061	0.174379	0.076 to 0.253
TG(50:3) [NL-18:2]		0.0175594	-0.009 to 0.044	0.191687	0.552971	0.0178151	-0.01 to 0.041	0.250433	0.166 to 0.335	1.1933e-08	1.42462e-07	0.252113	0.167 to 0.337
TG(50:3) [NL-18:3]		0.0178316	-0.009 to 0.045	0.190855	0.552971	0.0167852	-0.005 to 0.04	0.183136	0.096 to 0.27	4.26631e-05	0.000160712	0.183068	0.094 to 0.273
TG(50:4) [NL-14:0]		0.0206072	-0.006 to 0.047	0.125436	0.455946	0.0209314	-0.007 to 0.046	0.241485	0.156 to 0.327	4.60531e-08	4.5237e-07	0.243453	0.157 to 0.32
TG(50:4) [NL-18:3]		0.0205005	-0.006 to 0.047	0.128714	0.458452	0.0209268	-0.006 to 0.045	0.228811	0.143 to 0.315	2.79552e-07	2.19123e-06	0.232934	0.127 to 0.303
TG(50:4) [NL-20:4]		-0.00184437	-0.028 to 0.024	0.890439	0.965057	-0.00272719	-0.027 to 0.025	0.166441	0.08 to 0.253	0.000185681	0.00060037	0.169826	0.074 to 0.262
TG(51:0) [NL-16:0]		0.00929511	-0.017 to 0.036	0.493921	0.772747	0.00905526	-0.017 to 0.034	0.134111	0.046 to 0.222	0.00282897	0.00669292	0.134441	0.048 to 0.222
TG(51:1) [NL-17:0]		0.0113145	-0.015 to 0.037	0.396964	0.722173	0.0119575	-0.015 to 0.037	0.152623	0.066 to 0.24	0.000625691	0.00173358	0.154204	0.052 to 0.241
TG(51:2) [NL-15:0]		0.0135957	-0.013 to 0.04	0.312405	0.68482	0.0140728	-0.012 to 0.037	0.129329	0.042 to 0.216	0.0037505	0.00863616	0.129134	0.034 to 0.223
TG(51:2) [NL-17:0]		0.00827545	-0.017 to 0.034	0.524593	0.790297	0.00912142	-0.019 to 0.032	0.111062	0.024 to 0.198	0.012721	0.0256402	0.116123	0.002 to 0.206
TG(51:2) [NL-17:1]		0.00830114	-0.017 to 0.034	0.52328	0.790297	0.0083607	-0.015 to 0.034	0.111065	0.024 to 0.198	0.012718	0.0256402	0.112768	0.022 to 0.211
TG(52:1) [NL-18:0]		0.0148423	-0.011 to 0.041	0.268014	0.64191	0.014579	-0.011 to 0.042	0.208498	0.123 to 0.294	2.48857e-06	1.3696e-05	0.209384	0.119 to 0.298
TG(52:1) [NL-18:1]		0.0120236	-0.014 to 0.038	0.365079	0.719227	0.0120506	-0.018 to 0.04	0.21537	0.13 to 0.301	1.10454e-06	6.74903e-06	0.216786	0.126 to 0.302
TG(52:2) [NL-16:0]		0.0244784	-0.002 to 0.051	0.0686069	0.38107	0.0242061	-0.001 to 0.052	0.241232	0.156 to 0.326	4.26484e-08	4.24297e-07	0.243868	0.145 to 0.325
TG(52:2) [NL-18:2]		0.0190366	-0.007 to 0.045	0.158844	0.489138	0.0190681	-0.008 to 0.041	0.197283	0.112 to 0.283	7.8238e-06	3.59247e-05	0.197876	0.116 to 0.281
TG(52:3) [NL-16:1]		0.0138545	-0.011 to 0.039	0.279282	0.649412	0.0143159	-0.012 to 0.039	0.0623095	-0.024 to 0.149	0.159674	0.228189	0.064941	-0.032 to 0.149
TG(52:3) [NL-18:2]		0.0215171	-0.005 to 0.048	0.114018	0.444611	0.020631	-0.004 to 0.05	0.236376	0.152 to 0.321	7.2722e-08	6.71813e-07	0.236071	0.156 to 0.325
TG(52:4) [NL-16:1]		0.0182815	-0.008 to 0.044	0.172209	0.515189	0.0190537	-0.01 to 0.043	0.236924	0.152 to 0.322	8.38274e-08	7.65295e-07	0.238908	0.148 to 0.322
TG(52:4) [NL-18:2]		0.0117587	-0.014 to 0.038	0.375238	0.720754	0.0125431	-0.016 to 0.036	0.239094	0.154 to 0.324	6.23611e-08	5.90149e-07	0.240501	0.153 to 0.318
TG(52:4) [NL-18:3]		0.0311633	0.005 to 0.058	0.02135	0.285648	0.030975	0.008 to 0.057	0.274045	0.189 to 0.359	6.65764e-10	1.12311e-08	0.276764	0.182 to 0.354
TG(52:5) [NL-18:3]		0.0199991	-0.006 to 0.046	0.130564	0.458452	0.020625	-0.007 to 0.044	0.29561	0.211 to 0.38	1.89279e-11	5.55637e-10	0.296171	0.212 to 0.372
TG(52:5) [NL-20:4]		0.00050732	-0.026 to 0.027	0.96969	0.987228	0.000264501	-0.025 to 0.029	0.215209	0.13 to 0.301	1.09788e-06	6.74903e-06	0.216209	0.113 to 0.309
TG(52:5) [NL-20:5]		-0.00403167	-0.03 to 0.022	0.764683	0.91185	-0.0037261	-0.03 to 0.021	0.107479	0.02 to 0.195	0.0169934	0.0329672	0.107936	0.019 to 0.203
TG(53:2) [NL-17:1]		0.0222444	-0.004 to 0.048	0.0937249	0.401314	0.0223433	-0.005 to 0.048	0.196566	0.11 to 0.283	1.01085e-05	4.50815e-05	0.195666	0.099 to 0.288
TG(53:2) [NL-18:1]		0.0239719	-0.002 to 0.05	0.067592	0.38107	0.0243007	-0.001 to 0.049	0.232917	0.148 to 0.318	1.17959e-07	1.00589e-06	0.232162	0.141 to 0.324
TG(54:0) [NL-18:0]		0.0150378	-0.011 to 0.042	0.265994	0.64004	0.0152958	-0.011 to 0.042	0.129209	0.042 to 0.217	0.00401178	0.00916573	0.130237	0.042 to 0.216
TG(54:1) [NL-18:1]		0.0263068	0 to 0.053	0.0516249	0.359736	0.0263596	-0.001 to 0.052	0.22263	0.137 to 0.309	5.54415e-07	3.94703e-06	0.222765	0.13 to 0.303
TG(54:2) [NL-18:0]		0.0271988	0.001 to 0.053	0.0411839	0.337231	0.0277725	0.002 to 0.054	0.317219	0.234 to 0.401	3.84447e-13	2.29485e-11	0.319359	0.226 to 0.389
TG(54:2) [NL-20:1]		0.0223413	-0.004 to 0.049	0.096933	0.404409	0.0216477	-0.006 to 0.048	0.283079	0.2 to 0.367	8.08248e-11	1.792e-09	0.284005	0.184 to 0.369
TG(54:3) [NL-18:1]		0.0250727	-0.002 to 0.052	0.0657828	0.38107	0.0247881	-0.002 to 0.049	0.1696	0.082 to 0.257	0.000159684	0.00052955	0.17053	0.089 to 0.26
TG(54:3) [NL-18:2]		0.0217305	-0.004 to 0.047	0.0966064	0.404409	0.0215834	0 to 0.047	0.291531	0.208 to 0.375	2.72997e-11	7.30503e-10	0.291583	0.211 to 0.376
TG(54:4) [NL-18:2]		0.0221697	-0.004 to 0.048	0.094045	0.401314	0.0225776	-0.005 to 0.047	0.21346	0.128 to 0.299	1.42155e-06	8.42081e-06	0.215535	0.125 to 0.29
TG(54:4) [NL-20:3]		0.0248123	-0.001 to 0.05	0.0570384	0.363319	0.0245	-0.001 to 0.048	0.191944	0.107 to 0.277	1.11562e-05	4.89108e-05	0.190728	0.103 to 0.275
TG(54:5) [NL-18:3]		0.0262595	0 to 0.053	0.051499	0.359736	0.0272308	-0.003 to 0.049	0.214402	0.128 to 0.301	1.51164e-06	8.75396e-06	0.216707	0.136 to 0.296
TG(54:5) [NL-20:4]		0.00728928	-0.019 to 0.034	0.588655	0.826132	0.00638001	-0.02 to 0.032	0.298207	0.215 to 0.381	6.72923e-12	2.37358e-10	0.296554	0.211 to 0.378
TG(54:6) [NL-18:3]		0.0241913	-0.002 to 0.05	0.0661688	0.38107	0.0247153	-0.004 to 0.049	0.216648	0.13 to 0.303	1.2841e-06	7.66509e-06	0.215636	0.136 to 0.295
TG(54:6) [NL-20:4]		0.00840974	-0.018 to 0.035	0.528956	0.790989	0.00897245	-0.018 to 0.032	0.304273	0.221 to 0.387	2.40706e-12	1.03771e-10	0.306151	0.213 to 0.377
TG(54:6) [NL-20:5]		0.00101557	-0.025 to 0.027	0.93847	0.980047	0.001115	-0.028 to 0.025	0.136398	0.05 to 0.223	0.00207447	0.00507819	0.135282	0.044 to 0.232
TG(54:6) [NL-22:6]		-0.0211102	-0.046 to 0.004	0.10322	0.420731	-0.0214376	-0.047 to 0.001	0.115362	0.03 to 0.201	0.00839619	0.0177532	0.115154	0.027 to 0.194
TG(54:7) [NL-20:5]		0.0103691	-0.016 to 0.037	0.441074	0.747528	0.0105459	-0.014 to 0.034	0.259155	0.174 to 0.344	4.63783e-09	6.31396e-08	0.262975	0.166 to 0.339
TG(54:7) [NL-22:6]		-0.0109324	-0.037 to 0.015	0.408119	0.727346	-0.0103518	-0.038 to 0.015	0.198528	0.114 to 0.283	5.03672e-06	2.45817e-05	0.199178	0.112 to 0.278
TG(56:6) [NL-20:4]		0.019135	-0.006 to 0.045	0.144057	0.463581	0.0200463	-0.006 to 0.043	0.203226	0.118 to 0.289	3.88226e-06	1.99512e-05	0.205256	0.112 to 0.285
TG(56:6) [NL-22:5](a)		-0.00759674	-0.032 to 0.017	0.549332	0.803522	-0.00806573	-0.033 to 0.016	0.13188	0.047 to 0.217	0.00239053	0.00579705	0.130614	0.039 to 0.228
TG(56:6) [NL-22:5](b)		-0.00790822	-0.033 to 0.017	0.533408	0.79448	-0.00824211	-0.033 to 0.018	0.134384	0.05 to 0.219	0.00196928	0.00486676	0.133011	0.046 to 0.227
TG(56:7) [NL-20:4]		0.0189036	-0.007 to 0.045	0.153267	0.477652	0.019358	-0.008 to 0.045	0.192468	0.107 to 0.278	1.33206e-05	5.67957e-05	0.192505	0.108 to 0.27
TG(56:7) [NL-20:5]		-0.000208631	-0.026 to 0.025	0.987226	0.991668	0.000184634	-0.026 to 0.021	0.133278	0.048 to 0.219	0.00240092	0.00580409	0.134487	0.035 to 0.229
TG(56:7) [NL-22:5](a)		-0.00372388	-0.029 to 0.021	0.772113	0.91185	-0.00379367	-0.031 to 0.023	0.227874	0.144 to 0.312	1.53733e-07	1.24267e-06	0.228038	0.139 to 0.316
TG(56:7) [NL-22:5](b)		-0.00370778	-0.029 to 0.021	0.773137	0.91185	-0.00343806	-0.03 to 0.025	0.228462	0.145 to 0.312	1.42518e-07	1.16414e-06	0.228238	0.14 to 0.311
TG(56:7) [NL-22:6]		-0.0158554	-0.041 to 0.009	0.210661	0.577643	-0.0168008	-0.042 to 0.007	0.144195	0.06 to 0.228	0.000819613	0.0022161	0.143346	0.065 to 0.229
TG(56:8) [NL-20:4]		0.0130823	-0.013 to 0.039	0.318675	0.689713	0.0132442	-0.013 to 0.036	0.242669	0.158 to 0.328	3.6917e-08	3.76942e-07	0.244101	0.16 to 0.331
TG(56:8) [NL-20:5]		0.00964378	-0.017 to 0.036	0.471952	0.762989	0.0100521	-0.016 to 0.036	0.197074	0.111 to 0.283	9.58397e-06	4.32393e-05	0.197916	0.106 to 0.28
TG(56:8) [NL-22:6]		-0.0103235	-0.036 to 0.015	0.425117	0.744674	-0.00979715	-0.039 to 0.014	0.242751	0.16 to 0.325	1.35208e-08	1.58972e-07	0.244512	0.15 to 0.317
TG(56:9) [NL-22:6]		-0.0057774	-0.032 to 0.02	0.6611	0.862208	-0.00564277	-0.032 to 0.018	0.213363	0.129 to 0.297	8.7801e-07	5.72551e-06	0.212546	0.136 to 0.305
TG(58:10) [NL-22:6]		-0.000965749	-0.027 to 0.025	0.941213	0.980378	-0.000357209	-0.029 to 0.024	0.211499	0.128 to 0.295	9.61557e-07	6.11613e-06	0.211849	0.134 to 0.289
TG(58:8) [NL-22:6]		-0.00877043	-0.035 to 0.017	0.506279	0.784176	-0.00896363	-0.033 to 0.015	0.192432	0.108 to 0.277	1.0762e-05	4.77219e-05	0.194818	0.105 to 0.265
TG(58:9) [NL-22:6]		0.000989608	-0.025 to 0.027	0.939632	0.980047	0.00172605	-0.027 to 0.025	0.198417	0.114 to 0.282	4.63727e-06	2.27754e-05	0.198184	0.112 to 0.281
TG(O-50:1) [SIM]		-0.0146691	-0.041 to 0.011	0.268852	0.641935	-0.0145014	-0.04 to 0.008	0.0105715	-0.078 to 0.099	0.814118	0.862689	0.0129032	-0.084 to 0.105
TG(O-50:2) [SIM]		-0.0187576	-0.045 to 0.007	0.161194	0.494413	-0.0190124	-0.041 to 0.006	-0.12041	-0.207 to -0.033	0.00694555	0.0150552	-0.121711	-0.191 to -0.028
TG(O-50:3) [SIM]		-0.0268546	-0.054 to 0	0.0494423	0.359736	-0.0269132	-0.052 to 0	-0.151096	-0.239 to -0.063	0.000812437	0.00220437	-0.149916	-0.238 to -0.062
TG(O-52:0) [SIM]		-0.00810941	-0.034 to 0.018	0.540806	0.800261	-0.00887321	-0.029 to 0.018	-0.00203557	-0.09 to 0.086	0.963778	0.968771	0.0016144	-0.092 to 0.107
TG(O-52:1) [SIM]		-0.0115785	-0.037 to 0.014	0.370213	0.719227	-0.0119471	-0.037 to 0.014	-0.0073087	-0.095 to 0.08	0.870373	0.902954	-0.00613895	-0.102 to 0.105
TG(O-52:2) [SIM]		-0.0129878	-0.039 to 0.013	0.32553	0.691909	-0.0130787	-0.035 to 0.011	0.0430705	-0.045 to 0.131	0.336225	0.432981	0.0446316	-0.049 to 0.149
TG(O-54:2) [SIM]		-0.0177014	-0.043 to 0.007	0.16912	0.512646	-0.0189825	-0.041 to 0.005	-0.0255712	-0.113 to 0.062	0.567	0.657686	-0.0235152	-0.13 to 0.081
TG(O-54:3) [SIM]		-0.0305865	-0.057 to -0.005	0.0219324	0.288467	-0.0305668	-0.053 to -0.008	-0.0549907	-0.143 to 0.033	0.220228	0.301472	-0.0538386	-0.142 to 0.039
TG(O-54:4) [SIM]		-0.00417956	-0.031 to 0.022	0.755979	0.910931	-0.00435892	-0.029 to 0.025	0.103301	0.016 to 0.191	0.0214492	0.0406959	0.106059	0.007 to 0.204
TG(O-50:1) [NL-15:0]		-0.00338014	-0.03 to 0.023	0.803016	0.921805	-0.00264684	-0.03 to 0.024	0.0440839	-0.043 to 0.132	0.323975	0.42041	0.0452016	-0.049 to 0.15
TG(O-50:1) [NL-16:0]		-0.00997017	-0.037 to 0.017	0.463749	0.756706	-0.00973831	-0.035 to 0.016	0.0305376	-0.058 to 0.119	0.50017	0.596209	0.0310726	-0.063 to 0.122
TG(O-50:1) [NL-17:1]		0.00573631	-0.021 to 0.032	0.673449	0.869545	0.00593282	-0.02 to 0.03	0.0661707	-0.023 to 0.155	0.144248	0.209228	0.068899	-0.024 to 0.157
TG(O-50:1) [NL-18:1]		-0.0116685	-0.038 to 0.015	0.382627	0.722173	-0.0118225	-0.036 to 0.014	0.00376894	-0.084 to 0.092	0.933053	0.947708	0.00448765	-0.089 to 0.105
TG(O-50:2) [NL-16:1]		-0.0106429	-0.037 to 0.015	0.422909	0.743287	-0.00983163	-0.033 to 0.012	-0.128561	-0.214 to -0.043	0.00330549	0.00774943	-0.129149	-0.221 to -0.048
TG(O-50:2) [NL-18:1]		-0.0279652	-0.053 to -0.003	0.0313374	0.317409	-0.0292873	-0.052 to -0.004	-0.123221	-0.21 to -0.036	0.00576285	0.0127045	-0.124231	-0.218 to -0.036
TG(O-50:2) [NL-18:2]		-0.00984709	-0.036 to 0.016	0.461274	0.755166	-0.00972595	-0.039 to 0.014	0.00815699	-0.08 to 0.096	0.85548	0.892613	0.00751073	-0.095 to 0.098
TG(O-50:3) [NL-18:2]		-0.0214867	-0.047 to 0.004	0.104255	0.421229	-0.0215187	-0.049 to 0.003	-0.162801	-0.25 to -0.076	0.00026945	0.000833039	-0.16362	-0.249 to -0.068
TG(O-52:0) [NL-16:0]		-0.000198101	-0.026 to 0.025	0.987834	0.991668	-0.000129007	-0.026 to 0.026	0.0115806	-0.077 to 0.1	0.797876	0.850483	0.0141153	-0.084 to 0.126
TG(O-52:1) [NL-16:0]		-0.00690201	-0.033 to 0.019	0.602316	0.83003	-0.0076304	-0.03 to 0.021	0.0123621	-0.076 to 0.101	0.784123	0.841604	0.015374	-0.085 to 0.113
TG(O-52:1) [NL-18:1]		-0.0146331	-0.04 to 0.011	0.266297	0.64004	-0.0148073	-0.039 to 0.011	-0.0171782	-0.105 to 0.071	0.701241	0.778488	-0.0131852	-0.11 to 0.095
TG(O-52:2) [NL-16:0]		-0.0185298	-0.045 to 0.008	0.164448	0.502407	-0.0182941	-0.041 to 0.009	0.00417812	-0.083 to 0.092	0.925506	0.943748	0.00564583	-0.079 to 0.093
TG(O-52:2) [NL-17:1]		-0.0134528	-0.039 to 0.012	0.308744	0.684345	-0.0133355	-0.037 to 0.014	0.0327908	-0.055 to 0.121	0.464406	0.563092	0.0334655	-0.053 to 0.124
TG(O-52:2) [NL-18:1]		-0.0219249	-0.048 to 0.004	0.0946398	0.401314	-0.0225222	-0.045 to 0.001	-0.0286051	-0.116 to 0.059	0.521347	0.618601	-0.02747	-0.123 to 0.063
TG(O-54:2) [NL-17:1]		-0.0158156	-0.041 to 0.01	0.222594	0.591551	-0.0166624	-0.039 to 0.011	-0.0135128	-0.101 to 0.074	0.761356	0.820572	-0.0138182	-0.1 to 0.086
TG(O-54:2) [NL-18:1]		-0.0205004	-0.046 to 0.005	0.116155	0.44544	-0.020853	-0.045 to 0.001	-0.0431867	-0.131 to 0.044	0.333428	0.430515	-0.043132	-0.141 to 0.052
TG(O-54:3) [NL-17:1]		-0.0129804	-0.039 to 0.013	0.331912	0.696118	-0.0132488	-0.036 to 0.014	-0.0101666	-0.098 to 0.078	0.82081	0.866597	-0.0107351	-0.097 to 0.095
TG(O-54:3) [NL-18:1]		-0.0224072	-0.048 to 0.003	0.0858574	0.401314	-0.0225791	-0.047 to 0.002	-0.0251451	-0.112 to 0.062	0.571648	0.662088	-0.0244956	-0.122 to 0.068
TG(O-54:4) [NL-17:1]		0.0140734	-0.012 to 0.04	0.293372	0.671555	0.0146257	-0.012 to 0.037	0.0970018	0.009 to 0.185	0.0310456	0.0568193	0.0985719	0.008 to 0.175
TG(O-54:4) [NL-18:2]		-0.0190394	-0.045 to 0.006	0.143528	0.463581	-0.0202979	-0.039 to 0.008	-0.0118862	-0.099 to 0.075	0.789834	0.846341	-0.0143017	-0.106 to 0.076
Ubiquinone		-0.00925259	-0.035 to 0.017	0.484584	0.765859	-0.00967749	-0.034 to 0.018	0.00302702	-0.085 to 0.091	0.946172	0.954784	0.00334765	-0.087 to 0.092
CE(18:2) [+OH]		0.00456082	-0.022 to 0.032	0.740181	0.90883	0.00280306	-0.025 to 0.041	0.0615876	-0.026 to 0.15	0.170997	0.241261	0.0611178	-0.026 to 0.168
CE(20:4) [+OH]		-0.00139694	-0.027 to 0.024	0.913632	0.976554	-0.0019306	-0.027 to 0.023	0.076913	-0.01 to 0.164	0.0848462	0.134095	0.0779403	-0.014 to 0.172
CE(22:6) [+OH]		-0.0236358	-0.049 to 0.002	0.0699818	0.381993	-0.0229827	-0.05 to 0	-0.0257663	-0.112 to 0.061	0.55911	0.652435	-0.0228386	-0.115 to 0.055
LPC(18:2) [+OH]		-0.00313332	-0.02 to 0.014	0.714672	0.896113	-0.00263264	-0.026 to 0.015	0.0523152	-0.003 to 0.108	0.0642681	0.105661	0.0516555	0.002 to 0.105
LPC(20:4) [+OH]		-0.00317428	-0.018 to 0.011	0.666136	0.865865	-0.00299286	-0.025 to 0.014	0.0629224	0.017 to 0.109	0.00810678	0.0171881	0.0636148	0.019 to 0.107
LPC(22:6) [+OH]		-0.0102617	-0.024 to 0.003	0.140105	0.463077	-0.00946304	-0.032 to 0.005	0.0157312	-0.029 to 0.06	0.486199	0.582239	0.0155873	-0.026 to 0.057
PC(34:2) [+OH]		0.00392949	-0.022 to 0.03	0.769085	0.91185	0.00354827	-0.022 to 0.038	0.0451886	-0.041 to 0.132	0.305314	0.399534	0.045416	-0.054 to 0.133
PC(36:4) [+OH]		0.000747292	-0.025 to 0.027	0.955273	0.983273	0.000632922	-0.026 to 0.03	0.0861418	-0.001 to 0.173	0.0520215	0.0871894	0.0851804	-0.01 to 0.185
PC(38:6) [+OH]		-0.0045346	-0.03 to 0.021	0.730002	0.903881	-0.00389682	-0.032 to 0.021	-0.101567	-0.188 to -0.015	0.0213453	0.0406724	-0.0988057	-0.191 to -0.01
Regression coefficients (β) are estimated difference in log lipidomic measure at 12 months of age (SD units) per 1 increase in total parent-reported infections from birth to 12 months of age, or per 1 SD increase in 12-month log GlycA.
Models are adjusted for infant sex, birth weight z-score, gestational age, exact age at 12-month time point, maternal household income, exposure to any breastfeeding, exposure to any maternal smoking during pregnancy, and 12-month blood sample processing time.
Adjusted p-values are based on the Benjamini-Hochberg method of adjustment for multiple comparisons.
Bootstrap estimates are calculated as the mean coefficent across 1000 iterations of bootstrap resampling.
Bootstrap 95% confidence intervals are bias-corrected accelerated percentile confidence intervals.
