# Supplementary material for: Early life infection and proinflammatory, atherogenic metabolomic and lipidomic profiles in infancy: a population-based cohort study
Source: eLife. 2022 May 10;11:e75170. doi: 10.7554/eLife.75170 (PMC9090335; doi:10.7554/eLife.75170)
Supplement: Figure 5—source data 2. [file elife-75170-fig5-data2.xlsx]

## Sheet: Figure 5 - Source Data 2
Figure 5 - Source Data 2. Summary of regression models for difference in 6-month LC/MS lipidomic measures per 1 increase in parent-reported infection from birth to 6 months of age or per SD increase in 6-month log GlycA.
		Parent reported infections from birth to 6 months						6-month GlycA
Measure	Class Name	Estimate (β)	95% Confidence Interval	P-value	Adj. P-value	Bootstrap Estimate	Bootstrap 95% Confidence Interval	Estimate (β)	95% Confidence Interval	P-value	Adj. P-value	Bootstrap Estimate	Bootstrap 95% Confidence Interval
Total Sph	Sphingosines	0.0185489	-0.011 to 0.048	0.220251	0.686098	0.0190015	-0.008 to 0.046	0.139021	0.087 to 0.191	2.10705e-07	1.17393e-06	0.138665	0.092 to 0.189
Total S1P	Sphingosine phosphates	-0.00477573	-0.037 to 0.027	0.768758	0.88029	-0.00461392	-0.034 to 0.025	-0.0327566	-0.089 to 0.024	0.25607	0.322413	-0.0323915	-0.09 to 0.025
Total dhCer	Dihydro-ceramides	0.008116	-0.039 to 0.055	0.734078	0.88029	0.00798254	-0.034 to 0.05	-0.103342	-0.185 to -0.021	0.0138283	0.023448	-0.101536	-0.194 to -0.017
Total Cer	Ceramides	0.00768368	-0.039 to 0.054	0.746249	0.88029	0.00737871	-0.041 to 0.059	0.139909	0.059 to 0.221	0.00072672	0.00166718	0.141372	0.057 to 0.223
Total C1P	Ceramide-1-phosphate	-0.0384956	-0.086 to 0.009	0.109378	0.686098	-0.0380226	-0.088 to 0.011	-0.187941	-0.271 to -0.105	1.03703e-05	3.67675e-05	-0.188455	-0.279 to -0.102
Total MHC	Hexosyl-ceramides	0.00979024	-0.036 to 0.056	0.676837	0.88029	0.00854569	-0.034 to 0.053	-0.0628058	-0.144 to 0.019	0.132041	0.183914	-0.0637952	-0.148 to 0.014
Total DHC	Di-hexosyl-ceramides	0.0548353	0.008 to 0.101	0.0214555	0.418382	0.0544884	0.008 to 0.1	0.133328	0.051 to 0.216	0.00163999	0.0033663	0.131866	0.046 to 0.221
Total THC	Tri-hexosyl-ceramides	-0.0453037	-0.093 to 0.002	0.0609746	0.686098	-0.0452159	-0.092 to -0.001	-0.188987	-0.271 to -0.107	8.19849e-06	3.19741e-05	-0.191632	-0.263 to -0.104
Total GM3	GM3-gangliosides	-0.00980581	-0.056 to 0.036	0.676573	0.88029	-0.00961766	-0.059 to 0.034	-0.103229	-0.184 to -0.023	0.0124295	0.0220341	-0.102838	-0.178 to -0.025
Total GM1	GM1-gangliosides	0.0593399	0.012 to 0.106	0.0136112	0.418382	0.059584	0.015 to 0.108	0.0120904	-0.071 to 0.096	0.77645	0.796883	0.0129396	-0.078 to 0.097
Total Sulfatide	Sulfatides	0.00536808	-0.042 to 0.053	0.824545	0.88029	0.00642396	-0.045 to 0.055	-0.146394	-0.23 to -0.063	0.000630795	0.00153756	-0.149348	-0.233 to -0.067
Total SM	Sphingomyelins	-0.0113498	-0.058 to 0.036	0.635299	0.88029	-0.0113236	-0.055 to 0.035	-0.0448804	-0.127 to 0.037	0.285208	0.337064	-0.0440902	-0.129 to 0.036
Total PA	Phosphatidic acid	-0.0206407	-0.05 to 0.009	0.173551	0.686098	-0.020135	-0.049 to 0.009	-0.0297031	-0.082 to 0.023	0.267693	0.326251	-0.0289425	-0.087 to 0.023
Total PC	Phosphatidylcholines	-0.0232916	-0.07 to 0.023	0.326463	0.84579	-0.0222774	-0.065 to 0.021	-0.125421	-0.206 to -0.045	0.00242508	0.00472891	-0.12495	-0.215 to -0.043
Total PC_O	Alkyl phosphatidylcholines	0.00587958	-0.041 to 0.053	0.806102	0.88029	0.00461359	-0.041 to 0.055	-0.135427	-0.217 to -0.054	0.00121684	0.00263649	-0.133282	-0.208 to -0.05
Total PC_P	Alkenyl phosphatidylcholines	-0.0349968	-0.082 to 0.012	0.14123	0.686098	-0.0365878	-0.083 to 0.01	-0.292873	-0.371 to -0.214	9.66681e-13	2.12598e-11	-0.292438	-0.369 to -0.223
Total LPC	Lysophosphatidylcholines	-0.0228107	-0.059 to 0.013	0.213982	0.686098	-0.0227158	-0.059 to 0.008	-0.0895676	-0.152 to -0.027	0.00510664	0.00948376	-0.0880996	-0.15 to -0.025
Total LPC_O	Lysoalkyl phosphatidylcholines	0.00530091	-0.025 to 0.036	0.733336	0.88029	0.00492938	-0.022 to 0.034	-0.0133417	-0.067 to 0.04	0.625707	0.659529	-0.0125951	-0.065 to 0.045
Total LPC_P	Lysoalkenyl phosphatidylcholines	-0.0314824	-0.066 to 0.003	0.0717708	0.686098	-0.032071	-0.064 to -0.002	-0.18015	-0.239 to -0.122	3.10141e-09	4.03183e-08	-0.179505	-0.234 to -0.116
Total PE	Phosphatidylethanolamines	-0.00556105	-0.052 to 0.041	0.813855	0.88029	-0.00585707	-0.051 to 0.043	0.221866	0.142 to 0.302	7.82295e-08	5.08491e-07	0.223715	0.137 to 0.317
Total PE_O	Alkylphosphatidylethanolamines	-0.00868082	-0.055 to 0.038	0.712932	0.88029	-0.00858762	-0.059 to 0.039	-0.232554	-0.312 to -0.153	1.41592e-08	1.38052e-07	-0.231298	-0.318 to -0.157
Total PE_P	Alkenylphosphatidylethanolamines	-0.0124718	-0.058 to 0.033	0.591276	0.88029	-0.0127464	-0.058 to 0.03	-0.205254	-0.283 to -0.127	3.43224e-07	1.67322e-06	-0.206494	-0.284 to -0.13
Total LPE	Lysophosphatidylethanolamines	-0.0286766	-0.075 to 0.018	0.228699	0.686098	-0.0299655	-0.075 to 0.018	-0.082339	-0.164 to 0	0.0499303	0.0778913	-0.0848595	-0.157 to -0.004
Total LPE_P	Lysoalkenylphosphatidylethanolamines	0.0044739	-0.029 to 0.038	0.792224	0.88029	0.00467548	-0.026 to 0.033	-0.0295114	-0.088 to 0.029	0.324343	0.37204	-0.0286149	-0.09 to 0.026
Total PI	Phosphatidylinositols	-0.0249286	-0.072 to 0.022	0.300146	0.836121	-0.024352	-0.074 to 0.02	-0.0645399	-0.148 to 0.019	0.128282	0.183914	-0.063245	-0.154 to 0.023
Total PIP1	Phosphatidylinositol phosphate	0.00451912	-0.038 to 0.047	0.834011	0.88029	0.00550961	-0.036 to 0.048	-0.0255901	-0.101 to 0.05	0.507646	0.565662	-0.0269064	-0.092 to 0.057
Total LPI	Lysophosphatidylinositols	0.000573477	-0.045 to 0.046	0.98029	0.98029	-0.000253461	-0.046 to 0.049	-0.000831627	-0.081 to 0.08	0.983851	0.983851	-0.000884838	-0.078 to 0.081
Total PS	Phosphatidylserines	0.0207158	-0.011 to 0.053	0.204289	0.686098	0.0209913	-0.007 to 0.051	0.102572	0.046 to 0.159	0.000392061	0.00109217	0.104061	0.043 to 0.156
Total PG	Phosphatidylglycerols	-0.00484688	-0.05 to 0.041	0.835147	0.88029	-0.00569835	-0.047 to 0.045	0.146583	0.066 to 0.227	0.000367526	0.00109217	0.146037	0.065 to 0.232
Total CE	Cholesteryl esters	-0.0227195	-0.07 to 0.025	0.346991	0.84579	-0.0225712	-0.065 to 0.014	-0.198325	-0.281 to -0.116	3.10787e-06	1.34674e-05	-0.198525	-0.289 to -0.101
Total COH	Free cholesterol	-0.00613038	-0.053 to 0.041	0.798256	0.88029	-0.00507883	-0.053 to 0.036	-0.0570452	-0.14 to 0.026	0.177411	0.238587	-0.0545684	-0.15 to 0.023
Total DE	Dehydro-cholesteryl esters	-0.0193027	-0.065 to 0.027	0.411243	0.88029	-0.0196544	-0.058 to 0.022	-0.291772	-0.37 to -0.213	1.09025e-12	2.12598e-11	-0.292821	-0.372 to -0.213
Total FFA	Free fatty acids	-0.0143355	-0.054 to 0.025	0.479169	0.88029	-0.0147305	-0.057 to 0.026	-0.04099	-0.112 to 0.03	0.256277	0.322413	-0.039643	-0.108 to 0.033
Total Acylcarnitine	Acylcarnitines	0.00594672	-0.03 to 0.042	0.743597	0.88029	0.00546662	-0.033 to 0.044	-0.109028	-0.171 to -0.047	0.000598362	0.00153756	-0.108394	-0.176 to -0.042
Total DG	Diacylglycerols	-0.0173697	-0.064 to 0.03	0.469996	0.88029	-0.0172492	-0.067 to 0.032	0.227545	0.146 to 0.309	6.57459e-08	5.08491e-07	0.229859	0.137 to 0.307
Total TG	Triacylglycerols	-0.00389031	-0.05 to 0.042	0.867362	0.890187	-0.0039769	-0.049 to 0.046	0.178444	0.099 to 0.258	1.32892e-05	4.31899e-05	0.181347	0.09 to 0.26
Total TG_O	Alkyldiacylglycerols	-0.00791444	-0.053 to 0.037	0.729571	0.88029	-0.00766874	-0.057 to 0.034	-0.0763391	-0.156 to 0.003	0.0612348	0.0918522	-0.0755292	-0.153 to 0.017
Total Ubiquinone	Ubiquinone	0.0313894	-0.016 to 0.078	0.191729	0.686098	0.0323168	-0.012 to 0.074	-0.0958597	-0.179 to -0.012	0.0248913	0.0404484	-0.0947541	-0.195 to -0.013
Total OxSpecies	Oxidised species	0.0291072	-0.018 to 0.076	0.223139	0.686098	0.0294992	-0.023 to 0.112	-0.0224474	-0.106 to 0.061	0.599878	0.649868	-0.0236088	-0.114 to 0.064
Sph(d16:1)		0.0039776	-0.042 to 0.05	0.864604	0.997793	0.00481561	-0.041 to 0.049	0.118453	0.037 to 0.2	0.00447159	0.0098299	0.119414	0.038 to 0.19
Sph(d18:1)		0.0158272	-0.012 to 0.044	0.273464	0.997793	0.016533	-0.012 to 0.041	0.142332	0.093 to 0.192	2.37014e-08	3.60634e-07	0.144462	0.085 to 0.189
Sph(d18:2)		0.024762	-0.023 to 0.072	0.30752	0.997793	0.0242773	-0.026 to 0.068	-0.0172434	-0.103 to 0.068	0.692058	0.739721	-0.0167805	-0.098 to 0.075
S1P(d16:1)		-0.00893523	-0.044 to 0.026	0.61727	0.997793	-0.00957298	-0.044 to 0.025	0.00511395	-0.057 to 0.067	0.872093	0.891626	0.00596929	-0.062 to 0.072
S1P(d18:0)		-0.0156042	-0.05 to 0.019	0.370566	0.997793	-0.016548	-0.044 to 0.015	-0.0321708	-0.093 to 0.029	0.302105	0.368763	-0.0313501	-0.098 to 0.033
S1P(d18:1)		-0.00176706	-0.036 to 0.033	0.919591	0.997793	-0.00307042	-0.034 to 0.029	-0.0372406	-0.098 to 0.024	0.230619	0.29466	-0.0357187	-0.102 to 0.027
S1P(d18:2)		-0.00438912	-0.036 to 0.027	0.785176	0.997793	-0.00450542	-0.034 to 0.025	-0.0583654	-0.114 to -0.003	0.0401844	0.0656486	-0.0587172	-0.117 to 0.001
Cer(d18:0/16:0)		-0.00442755	-0.052 to 0.043	0.853896	0.997793	-0.00456905	-0.05 to 0.044	0.0294162	-0.053 to 0.112	0.485784	0.556	0.0294921	-0.055 to 0.118
Cer(d18:0/18:0)		0.00694479	-0.039 to 0.053	0.767204	0.997793	0.00685684	-0.037 to 0.047	-0.0594175	-0.141 to 0.022	0.151947	0.205063	-0.0575048	-0.152 to 0.022
Cer(d18:0/20:0)		-0.00380856	-0.051 to 0.043	0.873861	0.997793	-0.00383427	-0.047 to 0.044	-0.108946	-0.192 to -0.026	0.0100862	0.0200175	-0.106787	-0.188 to -0.02
Cer(d18:0/22:0)		0.00949107	-0.037 to 0.056	0.692273	0.997793	0.00847937	-0.037 to 0.054	-0.0722721	-0.155 to 0.011	0.0876749	0.128612	-0.0706274	-0.158 to 0.013
Cer(d18:0/24:0)		0.00437659	-0.043 to 0.052	0.855902	0.997793	0.00307771	-0.039 to 0.051	-0.139932	-0.223 to -0.057	0.000959808	0.00250778	-0.139158	-0.234 to -0.056
Cer(d18:0/24:1)		0.0148273	-0.032 to 0.061	0.531314	0.997793	0.0146371	-0.028 to 0.057	-0.0929757	-0.175 to -0.011	0.0261435	0.0451834	-0.0927905	-0.179 to -0.004
Cer(d16:1/16:0)		0.0168815	-0.029 to 0.063	0.471043	0.997793	0.0170692	-0.023 to 0.065	0.199507	0.119 to 0.28	1.44275e-06	9.99617e-06	0.201887	0.104 to 0.283
Cer(d16:1/18:0)		0.045706	-0.001 to 0.093	0.0575483	0.997793	0.0465287	-0.004 to 0.096	0.18878	0.107 to 0.27	7.28886e-06	3.87408e-05	0.187201	0.106 to 0.288
Cer(d16:1/20:0)		0.00455205	-0.042 to 0.051	0.847544	0.997793	0.00596442	-0.047 to 0.052	0.153453	0.072 to 0.235	0.000228897	0.000704856	0.15416	0.063 to 0.236
Cer(d16:1/22:0)		0.00219385	-0.043 to 0.048	0.924852	0.997793	0.00319486	-0.043 to 0.05	0.156665	0.077 to 0.237	0.000134883	0.000453114	0.157607	0.071 to 0.243
Cer(d16:1/23:0)		-0.00645175	-0.052 to 0.039	0.780546	0.997793	-0.00601476	-0.048 to 0.04	0.107448	0.027 to 0.188	0.00882377	0.0177851	0.10795	0.017 to 0.189
Cer(d16:1/24:0)		-0.0130133	-0.058 to 0.032	0.574141	0.997793	-0.0135251	-0.053 to 0.035	0.0796794	-0.001 to 0.16	0.0527992	0.0827721	0.0815318	0.002 to 0.165
Cer(d16:1/24:1)		0.0199628	-0.026 to 0.066	0.3986	0.997793	0.0212374	-0.027 to 0.063	0.212036	0.132 to 0.292	2.76918e-07	2.466e-06	0.210804	0.128 to 0.305
Cer(d17:1/16:0)		0.0339716	-0.013 to 0.081	0.15603	0.997793	0.0330326	-0.009 to 0.084	0.156596	0.075 to 0.239	0.000204488	0.000637281	0.157206	0.072 to 0.257
Cer(d17:1/18:0)		0.0223386	-0.025 to 0.07	0.356722	0.997793	0.0234071	-0.026 to 0.069	0.0606498	-0.023 to 0.145	0.157719	0.211747	0.063009	-0.031 to 0.156
Cer(d17:1/20:0)		0.0273187	-0.019 to 0.074	0.249508	0.997793	0.027266	-0.022 to 0.079	0.0637451	-0.018 to 0.146	0.12883	0.177403	0.0651757	-0.025 to 0.148
Cer(d17:1/22:0)		0.00718737	-0.04 to 0.054	0.76418	0.997793	0.00761357	-0.04 to 0.058	0.11921	0.037 to 0.202	0.00481696	0.0103832	0.121499	0.031 to 0.199
Cer(d17:1/23:0)		-0.0129378	-0.06 to 0.034	0.586452	0.997793	-0.0132565	-0.063 to 0.033	0.0689464	-0.013 to 0.151	0.101669	0.146301	0.068314	-0.022 to 0.158
Cer(d17:1/24:0)		-0.0200635	-0.067 to 0.027	0.400565	0.997793	-0.0199665	-0.069 to 0.033	0.0261213	-0.057 to 0.109	0.537009	0.605696	0.0268515	-0.067 to 0.111
Cer(d17:1/24:1)		0.0230342	-0.024 to 0.07	0.335584	0.997793	0.023337	-0.031 to 0.072	0.126486	0.044 to 0.209	0.00262872	0.00610745	0.125092	0.037 to 0.205
Cer(d18:1/14:0)		0.010829	-0.034 to 0.056	0.635987	0.997793	0.0114489	-0.031 to 0.053	0.0998817	0.02 to 0.179	0.0142154	0.0268328	0.101985	0.02 to 0.177
Cer(d18:1/16:0)		0.0502695	0.004 to 0.097	0.0339055	0.997793	0.049491	0.004 to 0.096	0.157259	0.077 to 0.238	0.000147121	0.000485899	0.154365	0.075 to 0.237
Cer(d18:1/17:0)		0.0249753	-0.021 to 0.071	0.284387	0.997793	0.024906	-0.022 to 0.072	0.0498822	-0.032 to 0.131	0.230477	0.29466	0.0503678	-0.03 to 0.133
Cer(d18:1/18:0)		0.0343934	-0.012 to 0.08	0.142456	0.997793	0.0355063	-0.015 to 0.08	0.107859	0.027 to 0.188	0.00891315	0.0178724	0.105561	0.031 to 0.197
Cer(d18:1/19:0)		0.0202369	-0.027 to 0.067	0.39744	0.997793	0.0210182	-0.025 to 0.067	0.0331262	-0.05 to 0.116	0.432745	0.500463	0.0323182	-0.046 to 0.114
Cer(d18:1/20:0)		0.0299002	-0.016 to 0.076	0.203806	0.997793	0.0318713	-0.017 to 0.07	0.105583	0.025 to 0.186	0.0105033	0.0207922	0.105709	0.026 to 0.185
Cer(d18:1/21:0)		0.00891678	-0.037 to 0.055	0.706483	0.997793	0.00973639	-0.041 to 0.058	0.108469	0.027 to 0.19	0.00933224	0.0186165	0.108345	0.021 to 0.198
Cer(d18:1/22:0)		0.0119773	-0.035 to 0.058	0.61378	0.997793	0.0120855	-0.034 to 0.067	0.166621	0.086 to 0.247	5.41608e-05	0.000205077	0.168645	0.086 to 0.259
Cer(d18:1/23:0)		0.0105171	-0.036 to 0.057	0.658787	0.997793	0.00989163	-0.036 to 0.061	0.13742	0.056 to 0.219	0.00101297	0.0026115	0.13561	0.044 to 0.219
Cer(d18:1/24:0)		0.00723719	-0.039 to 0.054	0.76135	0.997793	0.00776852	-0.041 to 0.058	0.120621	0.039 to 0.202	0.0039789	0.00889807	0.121084	0.032 to 0.203
Cer(d18:1/24:1)		0.0330874	-0.013 to 0.079	0.160368	0.997793	0.0332747	-0.015 to 0.08	0.110728	0.03 to 0.191	0.00737344	0.0152175	0.110485	0.04 to 0.199
Cer(d18:1/26:0)		-0.0183659	-0.066 to 0.029	0.449999	0.997793	-0.0191366	-0.06 to 0.028	0.0242301	-0.061 to 0.109	0.576242	0.636079	0.0244055	-0.08 to 0.116
Cer(d18:2/14:0)		0.0601751	0.013 to 0.107	0.0129066	0.997793	0.060736	0.014 to 0.106	0.0485411	-0.036 to 0.133	0.259529	0.326965	0.0496498	-0.036 to 0.124
Cer(d18:2/16:0)		0.0394613	-0.007 to 0.086	0.0950801	0.997793	0.0401661	-0.009 to 0.083	0.106432	0.025 to 0.188	0.0106942	0.0210627	0.104679	0.026 to 0.199
Cer(d18:2/17:0)		-0.0331047	-0.08 to 0.013	0.162847	0.997793	-0.0322259	-0.086 to 0.009	0.0379579	-0.045 to 0.121	0.371515	0.442171	0.0377726	-0.072 to 0.123
Cer(d18:2/18:0)		0.0220356	-0.024 to 0.068	0.352772	0.997793	0.0218909	-0.023 to 0.07	0.0499519	-0.032 to 0.132	0.230868	0.29466	0.0478931	-0.032 to 0.137
Cer(d18:2/20:0)		0.00871142	-0.038 to 0.056	0.716103	0.997793	0.007668	-0.044 to 0.058	0.0640872	-0.018 to 0.147	0.128816	0.177403	0.0646304	-0.02 to 0.153
Cer(d18:2/21:0)		0.0169293	-0.03 to 0.064	0.482377	0.997793	0.0164315	-0.033 to 0.07	0.103411	0.021 to 0.186	0.0147753	0.027628	0.103146	0.02 to 0.181
Cer(d18:2/22:0)		0.0051805	-0.041 to 0.052	0.826741	0.997793	0.00681626	-0.046 to 0.05	0.11817	0.037 to 0.2	0.00458834	0.0100581	0.115768	0.034 to 0.2
Cer(d18:2/23:0)		-0.00421312	-0.05 to 0.042	0.857596	0.997793	-0.00266628	-0.055 to 0.042	0.0812209	0 to 0.162	0.050315	0.0796667	0.0802998	-0.004 to 0.174
Cer(d18:2/24:0)		-0.00651344	-0.053 to 0.04	0.783821	0.997793	-0.00704556	-0.053 to 0.042	0.0757719	-0.006 to 0.158	0.0709145	0.10633	0.0769995	-0.016 to 0.155
Cer(d18:2/24:1)		0.0171746	-0.029 to 0.063	0.466916	0.997793	0.0183717	-0.034 to 0.065	0.119972	0.039 to 0.201	0.00389217	0.00875455	0.121035	0.038 to 0.201
Cer(d18:2/26:0)		-0.0113454	-0.058 to 0.035	0.635153	0.997793	-0.0112999	-0.057 to 0.038	0.0486204	-0.035 to 0.132	0.252567	0.319727	0.0486867	-0.032 to 0.132
Cer(d19:1/16:0)		-0.00617931	-0.053 to 0.04	0.795231	0.997793	-0.00594528	-0.058 to 0.04	-0.113351	-0.196 to -0.031	0.00742353	0.0152803	-0.113926	-0.195 to -0.031
Cer(d19:1/18:0)		0.00535454	-0.04 to 0.051	0.81826	0.997793	0.00601617	-0.043 to 0.048	-0.0672047	-0.148 to 0.013	0.103005	0.147475	-0.0657425	-0.14 to 0.021
Cer(d19:1/20:0)		-0.00510826	-0.052 to 0.041	0.829306	0.997793	-0.00630614	-0.051 to 0.042	-0.086988	-0.169 to -0.005	0.0390733	0.0641034	-0.0855887	-0.166 to -0.005
Cer(d19:1/22:0)		0.00280151	-0.043 to 0.048	0.904164	0.997793	0.00250266	-0.042 to 0.052	-0.113521	-0.194 to -0.033	0.00581913	0.0123716	-0.113116	-0.189 to -0.036
Cer(d19:1/23:0)		0.00482978	-0.041 to 0.051	0.836919	0.997793	0.00686287	-0.045 to 0.047	-0.109767	-0.191 to -0.029	0.00823124	0.016721	-0.109286	-0.189 to -0.037
Cer(d19:1/24:0)		0.00124315	-0.045 to 0.047	0.957607	0.997793	0.00217507	-0.041 to 0.049	-0.129365	-0.21 to -0.049	0.00175198	0.00423532	-0.131479	-0.201 to -0.046
Cer(d19:1/24:1)		0.00768003	-0.038 to 0.053	0.7405	0.997793	0.00815558	-0.037 to 0.048	-0.0939352	-0.174 to -0.014	0.0224506	0.0399579	-0.0941277	-0.162 to -0.016
Cer(d19:1/26:0)		-0.00669037	-0.054 to 0.04	0.780111	0.997793	-0.0075697	-0.045 to 0.041	-0.130271	-0.213 to -0.047	0.00224364	0.00529525	-0.133675	-0.221 to -0.043
Cer(d20:1/22:0)		-0.0158264	-0.062 to 0.03	0.498704	0.997793	-0.0144627	-0.059 to 0.026	-0.0767907	-0.158 to 0.004	0.0638675	0.097947	-0.075929	-0.163 to -0.001
Cer(d20:1/23:0)		-0.0139204	-0.061 to 0.033	0.558308	0.997793	-0.0140362	-0.068 to 0.028	-0.0719363	-0.154 to 0.011	0.0880423	0.128907	-0.0712652	-0.162 to 0.019
Cer(d20:1/24:0)		-0.0189554	-0.065 to 0.027	0.423083	0.997793	-0.0183705	-0.06 to 0.027	-0.0468423	-0.129 to 0.036	0.265757	0.333162	-0.0451398	-0.135 to 0.03
Cer(d20:1/24:1)		0.00178293	-0.044 to 0.047	0.938828	0.997793	0.00106371	-0.037 to 0.045	-0.0271181	-0.108 to 0.054	0.510369	0.581566	-0.0273745	-0.097 to 0.052
Cer(d20:1/26:0)		0.0350116	-0.012 to 0.082	0.143828	0.997793	0.0354163	-0.009 to 0.081	0.0495086	-0.034 to 0.133	0.247893	0.314836	0.0501655	-0.058 to 0.143
Cer(m18:0/20:0)		-0.0122582	-0.058 to 0.033	0.597627	0.997793	-0.0115753	-0.054 to 0.032	-0.0615903	-0.142 to 0.019	0.134096	0.182879	-0.0619737	-0.137 to 0.017
Cer(m18:0/22:0)		0.00193297	-0.045 to 0.048	0.935119	0.997793	0.0021067	-0.056 to 0.049	0.0254757	-0.056 to 0.107	0.54239	0.609993	0.0268832	-0.061 to 0.116
Cer(m18:0/23:0)		0.0210899	-0.026 to 0.068	0.378606	0.997793	0.0226985	-0.032 to 0.068	0.0246776	-0.058 to 0.108	0.560438	0.625755	0.0256546	-0.067 to 0.121
Cer(m18:0/24:0)		0.0078015	-0.039 to 0.055	0.744432	0.997793	0.00856307	-0.038 to 0.059	0.0073746	-0.076 to 0.09	0.861754	0.885724	0.0108425	-0.091 to 0.083
Cer(m18:0/24:1)		0.0269762	-0.02 to 0.073	0.255871	0.997793	0.0266827	-0.017 to 0.078	0.0514895	-0.03 to 0.133	0.21874	0.282432	0.0514339	-0.027 to 0.142
Cer(m18:1/18:0)		-0.0227527	-0.068 to 0.023	0.325758	0.997793	-0.0237146	-0.071 to 0.023	-0.0861703	-0.165 to -0.007	0.0332453	0.0553612	-0.087712	-0.162 to 0.004
Cer(m18:1/20:0)		-0.0170993	-0.063 to 0.029	0.463743	0.997793	-0.0175173	-0.062 to 0.029	-0.0622381	-0.143 to 0.018	0.129638	0.177737	-0.0630132	-0.142 to 0.017
Cer(m18:1/22:0)		-0.0185789	-0.065 to 0.028	0.434149	0.997793	-0.0180715	-0.065 to 0.03	-0.0363115	-0.119 to 0.046	0.386995	0.459187	-0.0353144	-0.121 to 0.048
Cer(m18:1/23:0)		-0.0132799	-0.06 to 0.034	0.579416	0.997793	-0.0123835	-0.066 to 0.035	0.00922523	-0.074 to 0.092	0.82801	0.853302	0.01141	-0.079 to 0.09
Cer(m18:1/24:0)		-0.025811	-0.073 to 0.021	0.279309	0.997793	-0.0246457	-0.075 to 0.028	-0.035883	-0.118 to 0.046	0.3926	0.463711	-0.0360822	-0.122 to 0.047
Cer(m18:1/24:1)		0.00700813	-0.039 to 0.053	0.765309	0.997793	0.00770852	-0.036 to 0.052	0.00396324	-0.077 to 0.085	0.923855	0.93714	0.00500857	-0.074 to 0.092
Cer1P(d18:1/16:0)		-0.0384956	-0.086 to 0.009	0.109378	0.997793	-0.0383912	-0.098 to 0.009	-0.187941	-0.271 to -0.105	1.03703e-05	5.15857e-05	-0.18716	-0.289 to -0.108
HexCer(d16:1/18:0)		-0.0533706	-0.101 to -0.006	0.0270935	0.997793	-0.0546207	-0.103 to -0.004	-0.272055	-0.354 to -0.19	1.43442e-10	6.54771e-09	-0.271066	-0.353 to -0.196
HexCer(d16:1/20:0)		-0.043556	-0.091 to 0.004	0.0718022	0.997793	-0.044668	-0.088 to -0.005	-0.216996	-0.3 to -0.134	3.97941e-07	3.43113e-06	-0.217737	-0.297 to -0.126
HexCer(d16:1/22:0)		-0.0278732	-0.074 to 0.018	0.234595	0.997793	-0.0283457	-0.067 to 0.018	-0.0984287	-0.18 to -0.017	0.0185185	0.0334973	-0.0986789	-0.184 to -0.016
HexCer(d16:1/24:0)		-0.0409503	-0.087 to 0.006	0.0849863	0.997793	-0.0410235	-0.084 to 0.004	-0.12295	-0.206 to -0.04	0.00369894	0.00834413	-0.126544	-0.199 to -0.026
HexCer(d18:1/16:0)		0.0482753	0.002 to 0.095	0.0412037	0.997793	0.0462745	0.006 to 0.098	0.0859286	0.004 to 0.168	0.0414958	0.0675069	0.0863073	-0.003 to 0.184
HexCer(d18:1/18:0)		-0.0220064	-0.068 to 0.024	0.350886	0.997793	-0.023776	-0.068 to 0.029	-0.217707	-0.298 to -0.138	1.40385e-07	1.47214e-06	-0.21753	-0.299 to -0.14
HexCer(d18:1/20:0)		-0.0178625	-0.064 to 0.028	0.444353	0.997793	-0.0188888	-0.065 to 0.025	-0.214021	-0.293 to -0.135	1.68293e-07	1.71836e-06	-0.214532	-0.289 to -0.132
HexCer(d18:1/22:0)		0.00372614	-0.042 to 0.05	0.873453	0.997793	0.00332611	-0.041 to 0.045	-0.111691	-0.193 to -0.031	0.007014	0.0145531	-0.111189	-0.192 to -0.036
HexCer(d18:1/24:0)		-0.0167786	-0.063 to 0.03	0.478124	0.997793	-0.0186187	-0.062 to 0.029	-0.118142	-0.2 to -0.036	0.00481454	0.0103832	-0.117192	-0.203 to -0.035
HexCer(d18:1/24:1)		0.0294119	-0.016 to 0.075	0.209221	0.997793	0.0276117	-0.011 to 0.071	0.00162323	-0.08 to 0.083	0.968937	0.976119	-0.00198714	-0.075 to 0.097
HexCer(d18:2/18:0)		-0.0290827	-0.075 to 0.017	0.219142	0.997793	-0.0294004	-0.076 to 0.015	-0.245568	-0.325 to -0.166	2.8526e-09	5.98274e-08	-0.244882	-0.327 to -0.167
HexCer(d18:2/20:0)		-0.0329024	-0.079 to 0.014	0.165859	0.997793	-0.0323974	-0.078 to 0.014	-0.190678	-0.272 to -0.11	4.73636e-06	2.68279e-05	-0.189506	-0.278 to -0.106
HexCer(d18:2/22:0)		-0.0267355	-0.073 to 0.019	0.257036	0.997793	-0.0279404	-0.069 to 0.024	-0.19869	-0.279 to -0.118	1.80417e-06	1.20693e-05	-0.199655	-0.277 to -0.123
HexCer(d18:2/24:0)		-0.0288689	-0.075 to 0.018	0.223927	0.997793	-0.0292818	-0.079 to 0.017	-0.196677	-0.278 to -0.116	2.5373e-06	1.61389e-05	-0.197045	-0.281 to -0.116
Hex2Cer(d16:1/16:0)		0.039208	-0.007 to 0.086	0.0978445	0.997793	0.0397778	-0.01 to 0.088	0.223122	0.143 to 0.303	7.24445e-08	8.59558e-07	0.225039	0.128 to 0.308
Hex2Cer(d16:1/24:1)		0.0183578	-0.028 to 0.065	0.43656	0.997793	0.0180689	-0.021 to 0.059	-0.0233369	-0.106 to 0.059	0.578488	0.637652	-0.0230804	-0.104 to 0.062
Hex2Cer(d18:1/16:0)		0.0618961	0.015 to 0.109	0.00977136	0.997793	0.0612745	0.016 to 0.108	0.197009	0.115 to 0.279	3.32991e-06	2.03466e-05	0.198048	0.109 to 0.282
Hex2Cer(d18:1/18:0)		0.0156327	-0.032 to 0.063	0.518848	0.997793	0.0158056	-0.036 to 0.066	-0.132072	-0.215 to -0.049	0.00187387	0.00450194	-0.131595	-0.207 to -0.047
Hex2Cer(d18:1/20:0)		0.00102159	-0.045 to 0.047	0.965181	0.997793	0.00114029	-0.043 to 0.048	-0.0626418	-0.144 to 0.019	0.130975	0.178938	-0.0636696	-0.147 to 0.022
Hex2Cer(d18:1/22:0)		0.0123682	-0.032 to 0.057	0.585868	0.997793	0.012131	-0.034 to 0.055	0.00374463	-0.075 to 0.083	0.926152	0.937377	0.00299666	-0.078 to 0.085
Hex2Cer(d18:1/24:0)		-0.00844768	-0.054 to 0.037	0.718569	0.997793	-0.00889929	-0.053 to 0.038	-0.0135481	-0.095 to 0.068	0.7456	0.788889	-0.0145041	-0.106 to 0.077
Hex2Cer(d18:1/24:1)		0.0698572	0.024 to 0.116	0.00312514	0.997793	0.0706383	0.027 to 0.115	0.0686441	-0.014 to 0.151	0.10483	0.149664	0.0677529	-0.015 to 0.165
Hex2Cer(d18:2/16:0)		0.0678938	0.022 to 0.114	0.0041757	0.997793	0.0674183	0.019 to 0.115	0.120725	0.038 to 0.203	0.00423017	0.00935216	0.121604	0.032 to 0.192
Hex2Cer(d18:2/24:1)		0.0419818	-0.005 to 0.089	0.0795196	0.997793	0.0406011	-0.003 to 0.088	-0.146935	-0.23 to -0.064	0.000569146	0.00157173	-0.146433	-0.224 to -0.064
Hex3Cer(d18:1/16:0)		-0.0337589	-0.081 to 0.014	0.165046	0.997793	-0.0340249	-0.078 to 0.015	-0.161516	-0.244 to -0.079	0.000150494	0.000494844	-0.162974	-0.241 to -0.075
Hex3Cer(d18:1/18:0)		-0.0594019	-0.106 to -0.012	0.0133534	0.997793	-0.0591569	-0.105 to -0.011	-0.230518	-0.312 to -0.15	3.85903e-08	5.44474e-07	-0.231513	-0.309 to -0.149
Hex3Cer(d18:1/20:0)		-0.0340985	-0.081 to 0.013	0.154712	0.997793	-0.0347511	-0.079 to 0.015	-0.193382	-0.275 to -0.112	3.77188e-06	2.23433e-05	-0.193396	-0.267 to -0.108
Hex3Cer(d18:1/22:0)		-0.0311418	-0.077 to 0.015	0.187898	0.997793	-0.0308104	-0.081 to 0.014	-0.157203	-0.239 to -0.076	0.000175962	0.00056192	-0.15673	-0.242 to -0.071
Hex3Cer(d18:1/24:0)		-0.0495553	-0.096 to -0.003	0.0387937	0.997793	-0.0507781	-0.095 to -0.005	-0.116452	-0.2 to -0.033	0.00626697	0.0131437	-0.117019	-0.19 to -0.034
Hex3Cer(d18:1/24:1)		-0.038359	-0.086 to 0.009	0.11254	0.997793	-0.0384551	-0.085 to 0.013	-0.138532	-0.222 to -0.055	0.00122138	0.00305739	-0.138347	-0.231 to -0.062
GM3(d18:1/16:0)		0.0416288	-0.005 to 0.089	0.0823593	0.997793	0.0395577	-0.001 to 0.087	0.0121115	-0.071 to 0.095	0.775392	0.810427	0.0117419	-0.077 to 0.092
GM3(d18:1/18:0)		-0.0304714	-0.077 to 0.016	0.198279	0.997793	-0.0307511	-0.079 to 0.011	-0.228472	-0.309 to -0.148	3.54399e-08	5.09284e-07	-0.227995	-0.308 to -0.151
GM3(d18:1/20:0)		-0.0183281	-0.064 to 0.028	0.435196	0.997793	-0.019043	-0.064 to 0.028	-0.0896251	-0.171 to -0.008	0.0317531	0.053219	-0.0903772	-0.166 to -0.006
GM3(d18:1/22:0)		-0.0163859	-0.062 to 0.03	0.484281	0.997793	-0.0162212	-0.063 to 0.028	-0.0824826	-0.163 to -0.002	0.0453128	0.0725005	-0.0815945	-0.154 to -0.005
GM3(d18:1/24:0)		-0.0409546	-0.088 to 0.006	0.0902765	0.997793	-0.0417484	-0.083 to 0.003	-0.0745259	-0.157 to 0.008	0.0785998	0.116178	-0.0748225	-0.156 to 0.011
GM3(d18:1/24:1)		-0.00918308	-0.055 to 0.037	0.694348	0.997793	-0.00920414	-0.059 to 0.037	-0.109337	-0.19 to -0.029	0.00785242	0.0159934	-0.106917	-0.191 to -0.035
GM1(d18:1/16:0)		0.0593399	0.012 to 0.106	0.0136112	0.997793	0.0595958	0.008 to 0.102	0.0120904	-0.071 to 0.096	0.77645	0.810427	0.0138593	-0.073 to 0.101
Sulfatide (d18:1:/16:0(OH))		-0.0181945	-0.066 to 0.03	0.456115	0.997793	-0.0177061	-0.068 to 0.038	-0.0749964	-0.16 to 0.01	0.0835261	0.122758	-0.0727733	-0.163 to 0.012
Sulfatide (d18:1:/16:0)		0.022616	-0.025 to 0.07	0.349403	0.997793	0.0228232	-0.028 to 0.071	-0.101961	-0.186 to -0.018	0.017708	0.0321813	-0.0991351	-0.196 to -0.021
Sulfatide (d18:1:/24:0(OH))		0.00160632	-0.046 to 0.049	0.946926	0.997793	0.00287182	-0.05 to 0.048	-0.0380274	-0.122 to 0.046	0.37648	0.447394	-0.0399767	-0.115 to 0.043
Sulfatide (d18:1:/24:0)		-0.0179233	-0.065 to 0.03	0.460357	0.997793	-0.0189864	-0.068 to 0.029	-0.211156	-0.294 to -0.128	7.75265e-07	5.95649e-06	-0.210693	-0.292 to -0.123
Sulfatide (d18:1:/24:1(OH))		-0.0169066	-0.064 to 0.03	0.483151	0.997793	-0.0167574	-0.07 to 0.034	-0.130966	-0.214 to -0.047	0.0022155	0.00527371	-0.131602	-0.205 to -0.056
Sulfatide (d18:1:/24:1)		-0.013085	-0.061 to 0.034	0.589124	0.997793	-0.0136521	-0.059 to 0.031	-0.208841	-0.291 to -0.127	8.3182e-07	6.26691e-06	-0.208275	-0.292 to -0.131
SM(34:3)		-0.00153165	-0.048 to 0.045	0.948959	0.997793	-0.00129275	-0.043 to 0.044	-0.0868821	-0.17 to -0.004	0.039769	0.0651071	-0.0870364	-0.171 to 0.01
SM(35:2) (b)		-0.00987915	-0.057 to 0.037	0.678859	0.997793	-0.0113493	-0.056 to 0.038	-0.134696	-0.215 to -0.055	0.00102895	0.00262652	-0.134591	-0.209 to -0.052
SM(37:1)		-0.027428	-0.075 to 0.02	0.256342	0.997793	-0.0271386	-0.074 to 0.021	-0.0990212	-0.182 to -0.016	0.0199898	0.0359909	-0.103716	-0.18 to -0.013
SM(37:2)		-0.00821084	-0.054 to 0.038	0.727714	0.997793	-0.00799123	-0.054 to 0.037	-0.159616	-0.24 to -0.079	0.000119303	0.000407837	-0.160319	-0.235 to -0.083
SM(38:3) (a)		0.0263389	-0.02 to 0.073	0.267555	0.997793	0.0263854	-0.017 to 0.073	0.0658706	-0.017 to 0.148	0.117691	0.164978	0.0647193	-0.024 to 0.154
SM(38:3) (b)		0.00116752	-0.045 to 0.047	0.960508	0.997793	0.00137222	-0.044 to 0.047	-0.149815	-0.231 to -0.069	0.000322569	0.000937505	-0.149497	-0.23 to -0.07
SM(40:3) (a)		0.00654394	-0.041 to 0.054	0.786249	0.997793	0.00663684	-0.036 to 0.055	0.0584659	-0.025 to 0.142	0.169952	0.226214	0.0585407	-0.022 to 0.14
SM(40:3) (b)		0.000990297	-0.045 to 0.047	0.966134	0.997793	0.000353223	-0.044 to 0.048	-0.142737	-0.223 to -0.063	0.000508536	0.00141951	-0.141664	-0.221 to -0.068
SM(41:0)		-0.00444845	-0.051 to 0.042	0.850026	0.997793	-0.00464994	-0.049 to 0.04	-0.139723	-0.221 to -0.059	0.000791911	0.00211176	-0.139626	-0.216 to -0.057
SM(41:1) (a)		-0.00102547	-0.047 to 0.045	0.965358	0.997793	-0.000791714	-0.045 to 0.044	-0.0846731	-0.167 to -0.003	0.0430944	0.0693802	-0.087106	-0.159 to 0.001
SM(43:1)		-0.0189882	-0.065 to 0.027	0.420131	0.997793	-0.0190702	-0.063 to 0.029	-0.0936022	-0.175 to -0.012	0.0250731	0.0438214	-0.0935316	-0.168 to -0.016
SM(43:2) (b)		0.0056274	-0.04 to 0.051	0.809885	0.997793	0.00459269	-0.037 to 0.051	-0.0551441	-0.136 to 0.026	0.184079	0.242522	-0.0557795	-0.135 to 0.029
SM(43:2) (c)		-0.0157043	-0.063 to 0.032	0.516498	0.997793	-0.0154461	-0.061 to 0.031	0.0110491	-0.073 to 0.095	0.797173	0.82923	0.0108454	-0.073 to 0.099
SM(44:1)		-0.036217	-0.083 to 0.011	0.129615	0.997793	-0.0354521	-0.083 to 0.007	-0.0846575	-0.167 to -0.002	0.0455568	0.0727409	-0.0838862	-0.163 to -0.01
SM(44:2)		-0.0176077	-0.064 to 0.029	0.455697	0.997793	-0.0170885	-0.062 to 0.023	-0.0463396	-0.129 to 0.036	0.269902	0.337269	-0.0466035	-0.121 to 0.034
SM(44:3)		-0.00998312	-0.057 to 0.037	0.680069	0.997793	-0.0101714	-0.05 to 0.032	0.0130799	-0.071 to 0.097	0.761367	0.801657	0.0140193	-0.065 to 0.097
SM(d16:1/19:0)		-0.011764	-0.058 to 0.034	0.614522	0.997793	-0.010831	-0.06 to 0.03	-0.173282	-0.253 to -0.093	2.59735e-05	0.000111975	-0.171514	-0.251 to -0.097
SM(d16:1/23:0)/SM(d17:1/22:0)		-0.0135307	-0.06 to 0.033	0.567754	0.997793	-0.0129781	-0.062 to 0.033	0.0411188	-0.041 to 0.123	0.328276	0.397413	0.038686	-0.047 to 0.128
SM(d16:1/24:1)		0.00402622	-0.043 to 0.051	0.86755	0.997793	0.00302305	-0.034 to 0.053	0.0442971	-0.039 to 0.128	0.299452	0.367101	0.0412953	-0.045 to 0.141
SM(d17:1/14:0)		-0.00779981	-0.055 to 0.04	0.74679	0.997793	-0.0072518	-0.058 to 0.04	-0.101105	-0.184 to -0.018	0.0176104	0.032079	-0.100404	-0.182 to -0.014
SM(d17:1/16:0)		-0.0160718	-0.063 to 0.031	0.503919	0.997793	-0.0143949	-0.067 to 0.033	-0.0937809	-0.177 to -0.011	0.0269992	0.0463527	-0.092517	-0.178 to -0.007
SM(d17:1/24:1)		0.0122559	-0.034 to 0.059	0.605304	0.997793	0.012479	-0.031 to 0.061	-0.0118794	-0.094 to 0.07	0.777008	0.810427	-0.0116217	-0.09 to 0.075
SM(d18:0/14:0)		0.000510434	-0.047 to 0.048	0.983229	0.997793	0.000659592	-0.049 to 0.047	-0.0780449	-0.162 to 0.006	0.0694044	0.104376	-0.0764022	-0.163 to 0.009
SM(d18:0/16:0)		-0.0100741	-0.056 to 0.036	0.669477	0.997793	-0.00995474	-0.057 to 0.035	-0.1348	-0.216 to -0.054	0.00119368	0.00300297	-0.133743	-0.207 to -0.055
SM(d18:0/22:0)		-0.00369116	-0.05 to 0.042	0.874769	0.997793	-0.00475639	-0.049 to 0.043	-0.131855	-0.213 to -0.051	0.00148456	0.00366884	-0.131064	-0.212 to -0.052
SM(d18:1/14:0/SM(d16:1/16:0)		-0.0161517	-0.063 to 0.031	0.501599	0.997793	-0.0153798	-0.063 to 0.03	-0.0193723	-0.102 to 0.064	0.647626	0.697997	-0.0193623	-0.114 to 0.062
SM(d18:1/16:0)		-0.0057097	-0.052 to 0.041	0.810866	0.997793	-0.00688922	-0.051 to 0.042	-0.0915232	-0.173 to -0.01	0.0278669	0.0476316	-0.0896444	-0.176 to -0.015
SM(d18:1/17:0)/SM(d17:1/18:0)		-0.0122413	-0.058 to 0.034	0.600433	0.997793	-0.0120526	-0.053 to 0.032	-0.149095	-0.229 to -0.069	0.000301938	0.000887515	-0.150707	-0.218 to -0.067
SM(d18:1/18:0/SM(d16:1/20:0)		-0.0297016	-0.076 to 0.017	0.208596	0.997793	-0.0303678	-0.073 to 0.019	-0.148734	-0.229 to -0.068	0.000326146	0.000944362	-0.147498	-0.222 to -0.064
SM(d18:1/20:0)/SM(d16:1/22:0)		-0.0208145	-0.067 to 0.026	0.38111	0.997793	-0.0211603	-0.067 to 0.026	0.000950295	-0.082 to 0.084	0.98202	0.985832	0.000283668	-0.078 to 0.085
SM(d18:1/22:0)/SM(d16:1/24:0)		-0.00983443	-0.057 to 0.037	0.680643	0.997793	-0.0104381	-0.058 to 0.041	0.0740085	-0.009 to 0.157	0.0799106	0.117891	0.0733141	-0.013 to 0.153
SM(d18:1/23:0)/SM(d17:1/24:0)		-0.00402755	-0.051 to 0.043	0.867682	0.997793	-0.00460473	-0.049 to 0.046	0.0869969	0.003 to 0.171	0.0419549	0.0679687	0.0859564	-0.008 to 0.171
SM(d18:1/24:0)		-0.0214668	-0.069 to 0.026	0.377229	0.997793	-0.0208407	-0.066 to 0.025	0.0598259	-0.025 to 0.145	0.167161	0.223264	0.0588373	-0.022 to 0.146
SM(d18:1/24:1)		0.0172173	-0.029 to 0.064	0.467922	0.997793	0.0163799	-0.024 to 0.056	0.0433004	-0.039 to 0.125	0.302233	0.368763	0.0440258	-0.035 to 0.125
SM(d18:2/14:0)		0.00194592	-0.045 to 0.049	0.935598	0.997793	0.00188568	-0.046 to 0.046	-0.149271	-0.232 to -0.067	0.0004418	0.00125581	-0.147729	-0.237 to -0.063
SM(d18:2/16:0)		-0.00591462	-0.052 to 0.041	0.803514	0.997793	-0.00595696	-0.053 to 0.036	-0.161602	-0.242 to -0.081	0.000101348	0.000355864	-0.163026	-0.242 to -0.072
SM(d18:2/17:0)		-0.00876532	-0.055 to 0.037	0.708633	0.997793	-0.00941458	-0.053 to 0.038	-0.168688	-0.249 to -0.088	4.4002e-05	0.000173328	-0.167646	-0.247 to -0.086
SM(d18:2/18:0)		-0.0220519	-0.068 to 0.024	0.345525	0.997793	-0.023364	-0.066 to 0.027	-0.176891	-0.256 to -0.097	1.5629e-05	7.44056e-05	-0.178726	-0.262 to -0.101
SM(d18:2/18:1)		0.00290048	-0.043 to 0.049	0.901831	0.997793	0.00194838	-0.043 to 0.053	-0.174598	-0.255 to -0.094	2.305e-05	0.000102798	-0.174392	-0.248 to -0.096
SM(d18:2/20:0)		-0.0244821	-0.071 to 0.022	0.303887	0.997793	-0.0249182	-0.073 to 0.024	-0.157974	-0.239 to -0.077	0.000153987	0.000502573	-0.159325	-0.241 to -0.076
SM(d18:2/22:0)		-0.017005	-0.064 to 0.03	0.478289	0.997793	-0.0165215	-0.062 to 0.026	-0.0653318	-0.148 to 0.018	0.12422	0.17275	-0.0653818	-0.151 to 0.018
SM(d18:2/23:0)		-0.00968937	-0.057 to 0.038	0.688734	0.997793	-0.010138	-0.055 to 0.037	0.00981139	-0.074 to 0.094	0.819074	0.84634	0.0083731	-0.082 to 0.09
SM(d18:2/24:0)		-0.0346352	-0.082 to 0.013	0.152034	0.997793	-0.0337642	-0.078 to 0.011	-0.0481829	-0.132 to 0.036	0.262465	0.330102	-0.0485213	-0.129 to 0.041
SM(d19:1/24:1)		0.00287543	-0.042 to 0.048	0.900998	0.997793	0.00213124	-0.035 to 0.046	-0.0969395	-0.177 to -0.017	0.0181986	0.0329956	-0.0978855	-0.166 to -0.018
PA(34:1)		-0.0148192	-0.047 to 0.017	0.363749	0.997793	-0.0139756	-0.046 to 0.018	-0.0481644	-0.105 to 0.009	0.097046	0.141026	-0.0477314	-0.109 to 0.008
PA(36:1)		-0.0181222	-0.055 to 0.019	0.336822	0.997793	-0.0182021	-0.054 to 0.019	-0.0374814	-0.103 to 0.028	0.264849	0.332561	-0.0362519	-0.106 to 0.023
PA(36:2)		-0.0163487	-0.047 to 0.015	0.300481	0.997793	-0.0159263	-0.045 to 0.014	-0.0162048	-0.071 to 0.039	0.562296	0.626028	-0.0152064	-0.072 to 0.038
PA(36:3)		-0.0250957	-0.055 to 0.005	0.100652	0.997793	-0.0255188	-0.054 to 0.003	-0.0097563	-0.063 to 0.043	0.717334	0.763582	-0.0103227	-0.064 to 0.044
PA(36:4)		-0.0342415	-0.069 to 0.001	0.0550017	0.997793	-0.03481	-0.066 to 0	-0.0289691	-0.091 to 0.033	0.357376	0.428485	-0.0300802	-0.095 to 0.035
PA(40:6)		0.0085646	-0.033 to 0.05	0.688973	0.997793	0.00840956	-0.036 to 0.05	-0.0580144	-0.133 to 0.017	0.128638	0.177403	-0.057469	-0.134 to 0.024
PC(14:0_16:0)		-0.0155344	-0.062 to 0.031	0.511339	0.997793	-0.0148023	-0.06 to 0.033	-0.176444	-0.257 to -0.096	1.94731e-05	8.94148e-05	-0.175172	-0.257 to -0.101
PC(14:0_20:4)		0.000266651	-0.047 to 0.047	0.991153	0.997793	0.00133506	-0.053 to 0.043	0.0414274	-0.043 to 0.125	0.334327	0.403481	0.0400069	-0.032 to 0.129
PC(14:0_22:6)		0.00908383	-0.038 to 0.056	0.705104	0.997793	0.00987707	-0.032 to 0.051	0.0107115	-0.073 to 0.095	0.802625	0.833785	0.0123315	-0.074 to 0.087
PC(15-MHDA_18:1)		-0.0115762	-0.057 to 0.034	0.618547	0.997793	-0.0118948	-0.054 to 0.035	-0.156929	-0.237 to -0.077	0.000125454	0.000425118	-0.156931	-0.239 to -0.08
PC(15-MHDA_18:2)		-0.00890131	-0.055 to 0.037	0.704957	0.997793	-0.00978131	-0.054 to 0.031	-0.132241	-0.213 to -0.052	0.0013934	0.00346564	-0.132077	-0.211 to -0.053
PC(15-MHDA_20:4)		-0.0138973	-0.06 to 0.032	0.554639	0.997793	-0.014288	-0.059 to 0.031	-0.12308	-0.204 to -0.042	0.00298144	0.00680471	-0.121918	-0.203 to -0.044
PC(15-MHDA_22:6)		-0.0038859	-0.049 to 0.041	0.865778	0.997793	-0.00462071	-0.047 to 0.04	-0.150997	-0.23 to -0.072	0.000196237	0.000619026	-0.149971	-0.221 to -0.083
PC(15:0_20:3)		0.00828453	-0.038 to 0.055	0.728408	0.997793	0.0089044	-0.043 to 0.052	-0.0539949	-0.137 to 0.029	0.2016	0.262486	-0.0539378	-0.135 to 0.031
PC(15:0_20:4)		-0.00409384	-0.05 to 0.042	0.861271	0.997793	-0.00424534	-0.049 to 0.045	-0.090157	-0.171 to -0.009	0.0293435	0.0497894	-0.0890274	-0.176 to -0.008
PC(15:0_22:6)		0.00342617	-0.042 to 0.049	0.882541	0.997793	0.0049197	-0.04 to 0.046	-0.100782	-0.181 to -0.021	0.0140211	0.0266023	-0.099218	-0.175 to -0.031
PC(16:0_16:0)		-0.0241181	-0.071 to 0.022	0.309983	0.997793	-0.0245859	-0.065 to 0.019	-0.159789	-0.24 to -0.079	0.000115271	0.000395799	-0.15918	-0.247 to -0.087
PC(16:0_18:0)		-0.0300822	-0.076 to 0.016	0.198443	0.997793	-0.03079	-0.074 to 0.016	-0.150207	-0.23 to -0.07	0.000255047	0.000770103	-0.149759	-0.228 to -0.075
PC(16:0_18:1)		-0.0145831	-0.061 to 0.032	0.538018	0.997793	-0.0161706	-0.062 to 0.032	-0.107283	-0.188 to -0.027	0.00938692	0.0186776	-0.106944	-0.2 to -0.025
PC(16:0_18:2)		-0.0100764	-0.056 to 0.036	0.670516	0.997793	-0.00932961	-0.059 to 0.033	-0.0522259	-0.134 to 0.03	0.211997	0.27464	-0.052249	-0.146 to 0.023
PC(16:0_18:3) (a)		0.00574892	-0.041 to 0.052	0.808012	0.997793	0.00624795	-0.041 to 0.053	0.0118763	-0.07 to 0.094	0.776379	0.810427	0.013845	-0.074 to 0.102
PC(16:0_18:3) (b)		-0.0215249	-0.067 to 0.024	0.351499	0.997793	-0.0216339	-0.069 to 0.023	0.0620557	-0.018 to 0.142	0.128947	0.177403	0.0634975	-0.022 to 0.141
PC(16:0_20:3) (a)		-0.0164699	-0.063 to 0.03	0.491781	0.997793	-0.0161566	-0.063 to 0.034	-0.0589237	-0.142 to 0.024	0.163772	0.219115	-0.0569511	-0.157 to 0.017
PC(16:0_20:3) (b)		-0.0163081	-0.063 to 0.031	0.497929	0.997793	-0.0159712	-0.061 to 0.032	0.00493231	-0.079 to 0.089	0.908412	0.92268	0.00363175	-0.079 to 0.094
PC(16:0_20:4)		-0.00296269	-0.05 to 0.044	0.900848	0.997793	-0.00284539	-0.047 to 0.043	-0.0551526	-0.137 to 0.027	0.187305	0.246354	-0.0555148	-0.142 to 0.023
PC(16:0_20:5)		-0.00569248	-0.052 to 0.04	0.808459	0.997793	-0.00382283	-0.054 to 0.037	-0.0229507	-0.105 to 0.059	0.581528	0.640093	-0.022695	-0.097 to 0.06
PC(16:0_22:6)		-0.000269162	-0.046 to 0.046	0.99082	0.997793	-0.000531019	-0.048 to 0.035	-0.137932	-0.218 to -0.058	0.000826111	0.00219542	-0.138246	-0.218 to -0.066
PC(16:1_18:2)		-0.0203342	-0.067 to 0.026	0.392368	0.997793	-0.0184347	-0.072 to 0.031	-0.0341818	-0.117 to 0.048	0.417673	0.487389	-0.0339025	-0.114 to 0.052
PC(16:1_20:4)		-0.020275	-0.068 to 0.027	0.402513	0.997793	-0.0190768	-0.071 to 0.024	-0.0337611	-0.118 to 0.05	0.432371	0.500463	-0.0317487	-0.119 to 0.049
PC(16:1_22:6)		-0.00893409	-0.056 to 0.038	0.708608	0.997793	-0.0079371	-0.049 to 0.037	-0.0860369	-0.169 to -0.003	0.042869	0.0693049	-0.0871695	-0.165 to -0.003
PC(17:0_18:1)		-0.0180414	-0.064 to 0.028	0.44307	0.997793	-0.0180781	-0.063 to 0.024	-0.136824	-0.217 to -0.056	0.000939047	0.00246183	-0.137519	-0.22 to -0.062
PC(17:0_18:2)		-0.0370331	-0.084 to 0.01	0.119555	0.997793	-0.0372287	-0.081 to 0.007	-0.15505	-0.236 to -0.074	0.000188292	0.000596385	-0.154629	-0.237 to -0.073
PC(17:0_20:4)		-0.013455	-0.059 to 0.032	0.564972	0.997793	-0.0137839	-0.062 to 0.035	-0.113783	-0.194 to -0.033	0.00585535	0.0124146	-0.110864	-0.195 to -0.036
PC(17:0_22:6)		-0.00662335	-0.052 to 0.039	0.773812	0.997793	-0.00619347	-0.048 to 0.035	-0.131557	-0.211 to -0.052	0.00123861	0.00309056	-0.129533	-0.208 to -0.062
PC(17:1_18:2)		-0.0210246	-0.068 to 0.025	0.375811	0.997793	-0.020965	-0.065 to 0.023	-0.152517	-0.234 to -0.071	0.000256991	0.000772965	-0.152533	-0.231 to -0.067
PC(18:0_18:1)		-0.0340529	-0.08 to 0.012	0.148773	0.997793	-0.0340582	-0.08 to 0.012	-0.136156	-0.217 to -0.055	0.00100891	0.0026097	-0.135128	-0.216 to -0.052
PC(18:0_18:2)		-0.0217291	-0.068 to 0.025	0.361336	0.997793	-0.0201499	-0.074 to 0.026	-0.103757	-0.185 to -0.023	0.0122255	0.0235995	-0.104854	-0.204 to -0.025
PC(18:0_20:3)		-0.0100105	-0.056 to 0.036	0.670825	0.997793	-0.00987601	-0.054 to 0.037	-0.0259075	-0.108 to 0.056	0.535845	0.605263	-0.0243827	-0.106 to 0.052
PC(18:0_20:4)		-0.0170777	-0.063 to 0.029	0.469162	0.997793	-0.0165181	-0.062 to 0.031	-0.101115	-0.182 to -0.02	0.0151386	0.0281717	-0.100169	-0.182 to -0.017
PC(18:0_22:4)		0.000463085	-0.047 to 0.047	0.984593	0.997793	0.000412081	-0.051 to 0.047	-0.0675311	-0.151 to 0.016	0.111604	0.15775	-0.0659859	-0.152 to 0.017
PC(18:0_22:5) (n3)		-0.0129566	-0.059 to 0.033	0.580801	0.997793	-0.012516	-0.061 to 0.033	-0.169091	-0.249 to -0.089	4.34177e-05	0.000171899	-0.169602	-0.249 to -0.084
PC(18:0_22:5) (n6)		-0.00456571	-0.051 to 0.042	0.848834	0.997793	-0.00488496	-0.052 to 0.041	-0.0696201	-0.153 to 0.013	0.100686	0.145227	-0.0726622	-0.157 to 0.03
PC(18:0_22:6)		-0.00279349	-0.048 to 0.043	0.903934	0.997793	-0.00301586	-0.044 to 0.038	-0.0887942	-0.169 to -0.008	0.0306513	0.0515952	-0.0922464	-0.161 to -0.007
PC(18:1_18:1)		-0.032893	-0.079 to 0.014	0.165622	0.997793	-0.0318309	-0.082 to 0.017	-0.066064	-0.148 to 0.016	0.113909	0.160603	-0.0666672	-0.144 to 0.011
PC(18:1_18:2)		-0.0215053	-0.068 to 0.025	0.363011	0.997793	-0.0214622	-0.065 to 0.024	-0.0668214	-0.149 to 0.015	0.109949	0.156265	-0.0671613	-0.165 to 0.015
PC(18:1_20:3)		-0.00858696	-0.055 to 0.038	0.717937	0.997793	-0.00768215	-0.056 to 0.039	-0.0195408	-0.102 to 0.063	0.643983	0.696004	-0.0177954	-0.101 to 0.058
PC(18:1_22:6) (a)		0.00331747	-0.044 to 0.051	0.891237	0.997793	0.00283808	-0.045 to 0.048	-0.0279328	-0.112 to 0.057	0.517111	0.588384	-0.0276624	-0.103 to 0.043
PC(18:1_22:6) (b)		0.00870473	-0.037 to 0.054	0.708243	0.997793	0.00929593	-0.046 to 0.051	-0.133709	-0.214 to -0.053	0.00119577	0.00300297	-0.133113	-0.213 to -0.055
PC(18:2_18:2)		-0.0363911	-0.083 to 0.011	0.129115	0.997793	-0.0363152	-0.085 to 0.012	-0.0867682	-0.17 to -0.004	0.0410342	0.0668961	-0.0865667	-0.181 to 0.005
PC(18:2_20:5)		-0.0198341	-0.067 to 0.027	0.409649	0.997793	-0.0203213	-0.063 to 0.03	-0.130087	-0.213 to -0.047	0.00224502	0.00529525	-0.130667	-0.214 to -0.053
PC(20:0_20:4)		-0.0145436	-0.062 to 0.033	0.549985	0.997793	-0.015219	-0.058 to 0.03	-0.0364708	-0.121 to 0.048	0.399941	0.470947	-0.0370791	-0.109 to 0.044
PC(28:0)		-0.00206826	-0.049 to 0.044	0.930488	0.997793	-0.00194393	-0.048 to 0.043	-0.0498456	-0.132 to 0.033	0.236092	0.300834	-0.048481	-0.134 to 0.03
PC(31:0) (a)		-0.00022086	-0.046 to 0.045	0.992441	0.997793	0.000437727	-0.044 to 0.044	-0.138083	-0.218 to -0.058	0.000783953	0.00209775	-0.135417	-0.218 to -0.059
PC(31:0) (b)		-0.0137839	-0.059 to 0.032	0.553268	0.997793	-0.0131709	-0.061 to 0.025	-0.16212	-0.242 to -0.082	7.55561e-05	0.000272705	-0.160539	-0.243 to -0.083
PC(32:1)		-0.0200078	-0.065 to 0.025	0.380141	0.997793	-0.0191599	-0.063 to 0.022	-0.125579	-0.204 to -0.047	0.001777	0.00428246	-0.123668	-0.218 to -0.053
PC(32:2)		-0.0149616	-0.061 to 0.031	0.520459	0.997793	-0.0139469	-0.058 to 0.028	0.0214496	-0.06 to 0.103	0.604304	0.662345	0.0225691	-0.069 to 0.105
PC(33:0) (a)		-0.00832782	-0.054 to 0.037	0.719736	0.997793	-0.00898974	-0.057 to 0.038	-0.151786	-0.231 to -0.072	0.000204293	0.000637281	-0.151009	-0.225 to -0.074
PC(33:0) (b)		-0.0156106	-0.061 to 0.03	0.50276	0.997793	-0.0151512	-0.063 to 0.03	-0.170009	-0.25 to -0.09	3.39343e-05	0.00014234	-0.16837	-0.249 to -0.093
PC(33:1)		-0.0113577	-0.057 to 0.034	0.624874	0.997793	-0.0111285	-0.061 to 0.03	-0.155638	-0.235 to -0.076	0.000138157	0.000462111	-0.155925	-0.23 to -0.077
PC(33:2)		-0.00286793	-0.049 to 0.043	0.902885	0.997793	-0.00295122	-0.056 to 0.045	-0.0871728	-0.168 to -0.006	0.0351134	0.058098	-0.0862685	-0.169 to 0.004
PC(34:5)		-0.0032907	-0.05 to 0.044	0.891279	0.997793	-0.00289952	-0.046 to 0.042	0.0233236	-0.061 to 0.107	0.586377	0.644517	0.0246669	-0.057 to 0.105
PC(35:5)		-0.00397208	-0.05 to 0.042	0.864831	0.997793	-0.00322356	-0.047 to 0.039	-0.0628846	-0.144 to 0.018	0.128746	0.177403	-0.0603592	-0.143 to 0.024
PC(36:6) (a)		-0.00798803	-0.055 to 0.039	0.737775	0.997793	-0.00720886	-0.058 to 0.036	-0.0527554	-0.136 to 0.03	0.213557	0.276201	-0.0521849	-0.133 to 0.035
PC(38:2)		-0.0159312	-0.063 to 0.031	0.505188	0.997793	-0.0149479	-0.058 to 0.028	-0.0579781	-0.141 to 0.025	0.169221	0.225629	-0.0551258	-0.141 to 0.022
PC(38:4) (b)		0.0060144	-0.041 to 0.053	0.803458	0.997793	0.00629207	-0.043 to 0.061	-0.0666403	-0.15 to 0.017	0.119142	0.166584	-0.0664408	-0.158 to 0.021
PC(38:5) (a)		-0.0125161	-0.059 to 0.034	0.600099	0.997793	-0.011315	-0.064 to 0.033	-0.172276	-0.254 to -0.091	4.20159e-05	0.000167202	-0.17485	-0.255 to -0.095
PC(38:5) (b)		-0.00602957	-0.052 to 0.04	0.798796	0.997793	-0.00497101	-0.054 to 0.038	-0.0747733	-0.157 to 0.007	0.074058	0.11073	-0.0761548	-0.156 to 0.009
PC(38:6) (a)		-0.0147375	-0.062 to 0.033	0.544246	0.997793	-0.0146421	-0.061 to 0.028	-0.103519	-0.187 to -0.02	0.0156794	0.0289008	-0.103362	-0.187 to -0.011
PC(38:7)(c)		-0.0193667	-0.065 to 0.026	0.407369	0.997793	-0.0192341	-0.063 to 0.03	-0.180255	-0.26 to -0.101	1.12088e-05	5.43629e-05	-0.180491	-0.259 to -0.113
PC(39:5)(a)		-0.0151494	-0.061 to 0.031	0.516422	0.997793	-0.0152248	-0.06 to 0.028	-0.159406	-0.24 to -0.079	0.000110841	0.000382278	-0.159786	-0.242 to -0.08
PC(39:5)(b)		-0.0168011	-0.063 to 0.029	0.472661	0.997793	-0.0175075	-0.062 to 0.033	-0.175557	-0.256 to -0.096	2.02586e-05	9.19339e-05	-0.174924	-0.263 to -0.1
PC(40:10)		0.00975538	-0.027 to 0.046	0.598237	0.997793	0.0103528	-0.025 to 0.045	0.036196	-0.028 to 0.101	0.272178	0.339021	0.0384189	-0.039 to 0.096
PC(40:7) (a)		-0.0334507	-0.08 to 0.014	0.163333	0.997793	-0.0339174	-0.075 to 0.013	-0.115541	-0.199 to -0.032	0.00660607	0.0137804	-0.11577	-0.202 to -0.033
PC(40:8)		-0.0336814	-0.081 to 0.013	0.159908	0.997793	-0.0341694	-0.074 to 0.009	-0.163985	-0.246 to -0.082	0.000107536	0.000375893	-0.163192	-0.244 to -0.083
PC(44:12)		-0.0201841	-0.066 to 0.026	0.393006	0.997793	-0.0206494	-0.062 to 0.024	-0.23808	-0.318 to -0.158	9.37684e-09	1.77474e-07	-0.23832	-0.313 to -0.168
PC(O-16:0/16:0)		0.000497002	-0.047 to 0.048	0.983493	0.997793	-0.000216128	-0.05 to 0.053	-0.0636053	-0.146 to 0.019	0.130577	0.178709	-0.0631966	-0.143 to 0.014
PC(O-16:0/20:3)		-0.0135593	-0.061 to 0.033	0.572234	0.997793	-0.0137379	-0.059 to 0.03	-0.111584	-0.195 to -0.028	0.00878946	0.017762	-0.110411	-0.192 to -0.033
PC(O-16:0/20:4)		0.00117734	-0.046 to 0.048	0.960768	0.997793	0.00109414	-0.048 to 0.042	-0.0933228	-0.175 to -0.011	0.025986	0.0451121	-0.0942231	-0.175 to -0.008
PC(O-16:0/22:6)		0.00837791	-0.037 to 0.054	0.719135	0.997793	0.0077002	-0.033 to 0.051	-0.0755724	-0.156 to 0.005	0.0662424	0.10099	-0.0744517	-0.147 to -0.004
PC(O-18:0/18:1)		-0.00946292	-0.056 to 0.037	0.691864	0.997793	-0.0100956	-0.055 to 0.038	-0.154348	-0.236 to -0.073	0.000232692	0.000713713	-0.155655	-0.226 to -0.066
PC(O-18:0/18:2)		-0.00863737	-0.056 to 0.039	0.721074	0.997793	-0.00969985	-0.053 to 0.038	-0.12221	-0.205 to -0.039	0.00408415	0.00908109	-0.121153	-0.215 to -0.033
PC(O-18:0/20:4)		-0.00248662	-0.048 to 0.043	0.915634	0.997793	-0.00173564	-0.047 to 0.043	-0.166853	-0.247 to -0.087	4.91992e-05	0.000189943	-0.165787	-0.246 to -0.093
PC(O-18:0/22:6)		0.00517576	-0.04 to 0.05	0.82266	0.997793	0.00383986	-0.037 to 0.05	-0.142098	-0.221 to -0.063	0.000463127	0.00130686	-0.141073	-0.215 to -0.069
PC(O-18:1/18:1)		0.00495289	-0.042 to 0.052	0.836713	0.997793	0.00495339	-0.039 to 0.048	-0.0950564	-0.178 to -0.012	0.025345	0.044098	-0.0904781	-0.184 to -0.009
PC(O-18:1/18:2)		-0.0038621	-0.05 to 0.042	0.869715	0.997793	-0.00329397	-0.051 to 0.036	-0.0331123	-0.115 to 0.049	0.427124	0.496923	-0.0295275	-0.118 to 0.052
PC(O-32:1)		-0.00723862	-0.053 to 0.039	0.758739	0.997793	-0.00719958	-0.053 to 0.038	-0.191083	-0.271 to -0.111	3.75376e-06	2.23433e-05	-0.189737	-0.27 to -0.114
PC(O-32:2)		-0.0123172	-0.059 to 0.034	0.604525	0.997793	-0.0121438	-0.058 to 0.031	-0.18568	-0.266 to -0.105	8.14903e-06	4.3018e-05	-0.183309	-0.27 to -0.112
PC(O-34:1)		0.00306177	-0.043 to 0.049	0.896763	0.997793	0.00220681	-0.045 to 0.052	-0.117141	-0.198 to -0.036	0.00476672	0.0103323	-0.117719	-0.192 to -0.036
PC(O-34:2)		-0.00270518	-0.05 to 0.044	0.910417	0.997793	-0.00293133	-0.047 to 0.045	-0.055029	-0.138 to 0.028	0.19665	0.257771	-0.0547887	-0.155 to 0.026
PC(O-34:4)		-0.0083756	-0.055 to 0.038	0.725758	0.997793	-0.00925796	-0.056 to 0.038	-0.166644	-0.248 to -0.085	6.82634e-05	0.00024987	-0.164508	-0.245 to -0.089
PC(O-35:4)		0.0102881	-0.036 to 0.056	0.660425	0.997793	0.0102769	-0.038 to 0.057	-0.137071	-0.218 to -0.056	0.000913364	0.00240261	-0.137548	-0.213 to -0.044
PC(O-36:0)		-0.0165099	-0.062 to 0.029	0.478821	0.997793	-0.0160064	-0.062 to 0.028	-0.0892686	-0.169 to -0.009	0.029386	0.0497894	-0.0885417	-0.164 to -0.018
PC(O-36:5)		-0.00124388	-0.047 to 0.045	0.957584	0.997793	-0.0020331	-0.044 to 0.042	-0.139311	-0.22 to -0.059	0.000716303	0.00194354	-0.140484	-0.211 to -0.059
PC(O-38:5)		0.028249	-0.019 to 0.075	0.237494	0.997793	0.0287942	-0.017 to 0.07	-0.103279	-0.186 to -0.021	0.0141898	0.0268328	-0.102511	-0.182 to -0.029
PC(O-40:5)		0.0320907	-0.014 to 0.078	0.170677	0.997793	0.031893	-0.013 to 0.076	-0.0889164	-0.17 to -0.008	0.0314579	0.0528383	-0.0884286	-0.166 to -0.008
PC(O-40:7) (a)		0.0262325	-0.02 to 0.072	0.263319	0.997793	0.0257175	-0.011 to 0.068	-0.0306734	-0.112 to 0.051	0.462144	0.530509	-0.029593	-0.101 to 0.042
PC(O-40:7) (b)		0.00280975	-0.044 to 0.05	0.906642	0.997793	0.00386728	-0.049 to 0.047	-0.140036	-0.223 to -0.057	0.000988139	0.00256865	-0.140308	-0.236 to -0.052
PC(P-15:0/20:4) (a)		0.0274586	-0.019 to 0.074	0.244496	0.997793	0.0270909	-0.021 to 0.079	0.0771143	-0.005 to 0.159	0.0667559	0.101375	0.078084	-0.005 to 0.166
PC(P-15:0/20:4) (b)		0.0247181	-0.021 to 0.071	0.292533	0.997793	0.0244962	-0.023 to 0.078	-0.192036	-0.272 to -0.112	3.38068e-06	2.04954e-05	-0.190429	-0.283 to -0.115
PC(P-16:0/14:0)		-0.0213192	-0.068 to 0.026	0.37386	0.997793	-0.0210229	-0.07 to 0.027	-0.303254	-0.383 to -0.224	2.79423e-13	4.37478e-11	-0.304239	-0.383 to -0.231
PC(P-16:0/16:0)		-0.0237622	-0.071 to 0.023	0.32254	0.997793	-0.0235412	-0.073 to 0.023	-0.26353	-0.344 to -0.183	2.42715e-10	8.56123e-09	-0.264177	-0.338 to -0.178
PC(P-16:0/16:1)		-0.034829	-0.081 to 0.012	0.1426	0.997793	-0.0348869	-0.083 to 0.014	-0.288206	-0.367 to -0.209	2.59941e-12	3.36191e-10	-0.286809	-0.369 to -0.215
PC(P-16:0/18:0)		-0.024382	-0.071 to 0.022	0.304849	0.997793	-0.0248887	-0.068 to 0.024	-0.239613	-0.319 to -0.16	6.32811e-09	1.29227e-07	-0.241755	-0.313 to -0.156
PC(P-16:0/18:1)		-0.0487051	-0.096 to -0.002	0.0433733	0.997793	-0.0504091	-0.096 to 0.002	-0.267634	-0.349 to -0.187	1.99693e-10	7.74811e-09	-0.267727	-0.348 to -0.192
PC(P-16:0/18:2)		-0.0368558	-0.084 to 0.011	0.128523	0.997793	-0.037969	-0.09 to 0.015	-0.233796	-0.316 to -0.152	3.46164e-08	5.06837e-07	-0.233186	-0.326 to -0.146
PC(P-16:0/18:3)		-0.0147095	-0.062 to 0.033	0.541791	0.997793	-0.0147849	-0.066 to 0.036	-0.174991	-0.258 to -0.092	3.88686e-05	0.000160436	-0.176704	-0.262 to -0.092
PC(P-16:0/20:4)		-0.0305685	-0.077 to 0.016	0.199421	0.997793	-0.0310338	-0.073 to 0.017	-0.24754	-0.327 to -0.168	2.2602e-09	5.01119e-08	-0.246821	-0.321 to -0.175
PC(P-16:0/20:5)		-0.0133645	-0.059 to 0.032	0.564126	0.997793	-0.0131975	-0.059 to 0.036	-0.209131	-0.288 to -0.131	2.42735e-07	2.28247e-06	-0.208004	-0.291 to -0.135
PC(P-16:0/22:6)		-0.0162863	-0.062 to 0.029	0.484939	0.997793	-0.016601	-0.061 to 0.024	-0.197724	-0.277 to -0.118	1.33524e-06	9.41954e-06	-0.198095	-0.267 to -0.128
PC(P-17:0/20:4) (a)		-0.0153964	-0.061 to 0.03	0.504968	0.997793	-0.015151	-0.062 to 0.024	-0.229974	-0.308 to -0.152	1.17574e-08	2.0275e-07	-0.230116	-0.308 to -0.159
PC(P-17:0/20:4) (b)		-0.0194704	-0.065 to 0.026	0.401705	0.997793	-0.0202207	-0.067 to 0.025	-0.257796	-0.335 to -0.18	1.70684e-10	6.97108e-09	-0.25755	-0.334 to -0.185
PC(P-18:0/18:2)		-0.0431997	-0.091 to 0.004	0.074517	0.997793	-0.042998	-0.09 to 0.004	-0.254062	-0.335 to -0.173	1.672e-09	3.95639e-08	-0.255481	-0.333 to -0.173
PC(P-18:0/20:4)		-0.0203237	-0.066 to 0.025	0.381762	0.997793	-0.0223125	-0.063 to 0.026	-0.233926	-0.312 to -0.156	7.27657e-09	1.41165e-07	-0.234841	-0.306 to -0.162
PC(P-18:0/22:5)		0.00599548	-0.039 to 0.051	0.795557	0.997793	0.00430133	-0.042 to 0.048	-0.196843	-0.275 to -0.118	1.15965e-06	8.33231e-06	-0.196072	-0.282 to -0.123
PC(P-18:0/22:6)		-0.00958927	-0.055 to 0.036	0.677093	0.997793	-0.0115745	-0.053 to 0.033	-0.172235	-0.251 to -0.094	2.0253e-05	9.19339e-05	-0.171364	-0.246 to -0.102
PC(P-18:1/18:1)		-0.0424591	-0.09 to 0.005	0.078624	0.997793	-0.0413924	-0.092 to 0.004	-0.22995	-0.312 to -0.148	5.54124e-08	7.16667e-07	-0.230731	-0.311 to -0.144
PC(P-18:1/22:6)		-0.0199026	-0.066 to 0.026	0.394304	0.997793	-0.0206004	-0.06 to 0.023	-0.203131	-0.283 to -0.124	7.31904e-07	5.67957e-06	-0.20188	-0.282 to -0.13
PC(P-20:0/20:4)		-0.0127165	-0.059 to 0.033	0.588332	0.997793	-0.0134417	-0.056 to 0.034	-0.207203	-0.287 to -0.128	4.27424e-07	3.56646e-06	-0.207548	-0.278 to -0.131
PC(P-35:2)(a)		-0.0253216	-0.071 to 0.02	0.279115	0.997793	-0.0258316	-0.074 to 0.022	-0.230896	-0.31 to -0.152	1.61912e-08	2.71288e-07	-0.228805	-0.315 to -0.155
PC(P-35:2)(b)		-0.0300067	-0.076 to 0.016	0.203478	0.997793	-0.0318238	-0.079 to 0.02	-0.259971	-0.339 to -0.181	2.24229e-10	8.2858e-09	-0.257512	-0.342 to -0.181
PC(P-36:3)		-0.0434527	-0.09 to 0.003	0.0677912	0.997793	-0.0428269	-0.093 to 0.003	-0.266669	-0.346 to -0.187	1.25688e-10	6.09586e-09	-0.265096	-0.351 to -0.195
PC(P-38:5) (a)		-0.0358767	-0.082 to 0.01	0.128688	0.997793	-0.0359366	-0.085 to 0.006	-0.298931	-0.377 to -0.221	2.51449e-13	4.37478e-11	-0.296803	-0.376 to -0.23
PC(P-38:5) (b)		-0.00838765	-0.054 to 0.038	0.721211	0.997793	-0.00871188	-0.052 to 0.037	-0.254321	-0.333 to -0.175	5.38574e-10	1.74139e-08	-0.252615	-0.33 to -0.177
LPC(14:0) [sn1]		-0.00727217	-0.048 to 0.034	0.727496	0.997793	-0.00594313	-0.048 to 0.03	-0.0463731	-0.119 to 0.026	0.211151	0.274002	-0.0458053	-0.116 to 0.019
LPC(14:0) [sn2]		-0.0124932	-0.054 to 0.029	0.550752	0.997793	-0.0129727	-0.049 to 0.028	-0.0727623	-0.145 to 0	0.0499341	0.0792411	-0.0740455	-0.141 to -0.002
LPC(15-MHDA) [sn1] [104_sn1]		-0.0129352	-0.056 to 0.031	0.56048	0.997793	-0.0137969	-0.051 to 0.029	-0.129149	-0.206 to -0.053	0.000989723	0.00256865	-0.13057	-0.2 to -0.054
LPC(15-MHDA) [sn1] / LPC(17:0) [sn2]		-0.0129267	-0.055 to 0.029	0.544779	0.997793	-0.0131761	-0.054 to 0.024	-0.118039	-0.191 to -0.045	0.00169046	0.00411223	-0.118656	-0.189 to -0.046
LPC(15-MHDA) [sn2]		-0.0141472	-0.058 to 0.03	0.528456	0.997793	-0.0135297	-0.058 to 0.023	-0.137493	-0.215 to -0.06	0.000511659	0.00142311	-0.135858	-0.217 to -0.07
LPC(15:0) [sn1]		-0.0128254	-0.053 to 0.027	0.532361	0.997793	-0.0131452	-0.051 to 0.023	-0.0994596	-0.17 to -0.029	0.00601097	0.0126753	-0.100468	-0.165 to -0.024
LPC(15:0) [sn2]		-0.00941948	-0.051 to 0.032	0.659137	0.997793	-0.0095903	-0.05 to 0.028	-0.106397	-0.18 to -0.033	0.00470584	0.0102577	-0.105361	-0.174 to -0.04
LPC(16:0) [sn1]		-0.0109278	-0.043 to 0.022	0.509592	0.997793	-0.010481	-0.04 to 0.021	-0.0175662	-0.074 to 0.039	0.542311	0.609993	-0.0171757	-0.079 to 0.041
LPC(16:0) [sn2]		-0.00485304	-0.036 to 0.027	0.762815	0.997793	-0.00513824	-0.033 to 0.027	-0.0114746	-0.067 to 0.044	0.684789	0.73296	-0.0104232	-0.07 to 0.045
LPC(16:1) [sn1]		-0.0255943	-0.065 to 0.014	0.203726	0.997793	-0.0245144	-0.065 to 0.007	-0.107493	-0.176 to -0.038	0.00237331	0.00556402	-0.108101	-0.18 to -0.04
LPC(16:1) [sn2]		-0.0234637	-0.065 to 0.018	0.269245	0.997793	-0.0225096	-0.061 to 0.014	-0.0956153	-0.169 to -0.022	0.0106502	0.0210295	-0.0970142	-0.164 to -0.022
LPC(17:0) [sn1]		-0.026142	-0.063 to 0.011	0.17066	0.997793	-0.0264782	-0.063 to 0.005	-0.105803	-0.171 to -0.04	0.00159875	0.00392605	-0.1062	-0.168 to -0.044
LPC(17:1) (a) [sn1] [104_sn1]		-0.0158756	-0.058 to 0.026	0.460638	0.997793	-0.0161387	-0.055 to 0.023	-0.144184	-0.218 to -0.071	0.000132607	0.000447405	-0.14444	-0.209 to -0.067
LPC(17:1) [sn1] (a) / LPC(17:1) [sn2] (b)		-0.0181448	-0.061 to 0.025	0.404973	0.997793	-0.0187312	-0.06 to 0.019	-0.158744	-0.233 to -0.084	3.27763e-05	0.000138986	-0.15975	-0.231 to -0.087
LPC(17:1) [sn1] (b)		-0.00898751	-0.054 to 0.036	0.697188	0.997793	-0.00817381	-0.053 to 0.032	-0.162443	-0.241 to -0.084	6.2763e-05	0.000233034	-0.161609	-0.242 to -0.091
LPC(17:1) [sn2] (a)		-0.014521	-0.058 to 0.029	0.512595	0.997793	-0.0148344	-0.059 to 0.024	-0.155779	-0.231 to -0.08	6.19532e-05	0.000231133	-0.155217	-0.23 to -0.092
LPC(18:0) [sn1]		-0.0259297	-0.06 to 0.008	0.131858	0.997793	-0.0259689	-0.058 to 0.008	-0.0582996	-0.117 to 0.001	0.0539896	0.0844676	-0.0567952	-0.114 to 0.005
LPC(18:0) [sn2]		-0.013963	-0.048 to 0.02	0.426215	0.997793	-0.0136413	-0.049 to 0.02	-0.0510317	-0.112 to 0.009	0.0989383	0.142972	-0.0500707	-0.112 to 0.011
LPC(18:1) [sn1]		-0.0285048	-0.067 to 0.01	0.144474	0.997793	-0.0285088	-0.067 to 0.009	-0.129231	-0.196 to -0.062	0.00016905	0.000542079	-0.129034	-0.19 to -0.067
LPC(18:1) [sn2]		-0.0211117	-0.062 to 0.019	0.307974	0.997793	-0.021156	-0.059 to 0.018	-0.113833	-0.185 to -0.043	0.0017327	0.0042018	-0.114776	-0.183 to -0.048
LPC(18:2) [sn1]		-0.0342212	-0.081 to 0.012	0.151629	0.997793	-0.033365	-0.086 to 0.008	-0.196627	-0.278 to -0.116	2.46982e-06	1.59715e-05	-0.195925	-0.271 to -0.116
LPC(18:2) [sn2]		-0.0345075	-0.081 to 0.012	0.1472	0.997793	-0.0372697	-0.082 to 0.013	-0.174151	-0.256 to -0.093	3.17979e-05	0.000135578	-0.175438	-0.249 to -0.101
LPC(18:3) (a) [sn1] [104_sn1]		-0.0172435	-0.061 to 0.026	0.439719	0.997793	-0.0179654	-0.055 to 0.026	-0.0703578	-0.148 to 0.007	0.0757965	0.112895	-0.0710194	-0.148 to 0.01
LPC(18:3) [sn1] (a)/LPC(18:3) [sn2] (b)		-0.018292	-0.062 to 0.026	0.414935	0.997793	-0.0182546	-0.056 to 0.021	-0.0659042	-0.144 to 0.012	0.0976518	0.141641	-0.0638436	-0.15 to 0.008
LPC(18:3) [sn1] (b)		-0.0289318	-0.074 to 0.016	0.205675	0.997793	-0.0289961	-0.072 to 0.014	-0.054024	-0.133 to 0.025	0.181929	0.240506	-0.052324	-0.132 to 0.025
LPC(18:3) [sn2] (a)		-0.00521843	-0.05 to 0.04	0.819705	0.997793	-0.00470569	-0.048 to 0.034	-0.0739205	-0.153 to 0.005	0.0681871	0.103145	-0.0738306	-0.149 to 0.012
LPC(19:0) (a) [sn1] [104_sn1]		-0.0198994	-0.063 to 0.023	0.367494	0.997793	-0.0188035	-0.067 to 0.017	-0.141475	-0.217 to -0.066	0.000281466	0.000833654	-0.143534	-0.212 to -0.064
LPC(19:0) [sn1] (a) / LPC(19:0) [sn2] (b)		-0.0251339	-0.065 to 0.014	0.213062	0.997793	-0.0257553	-0.065 to 0.011	-0.102849	-0.172 to -0.033	0.00391906	0.00878956	-0.100852	-0.174 to -0.038
LPC(19:0) [sn1] (b)		-0.0208657	-0.059 to 0.018	0.290059	0.997793	-0.0212099	-0.056 to 0.021	-0.0644289	-0.132 to 0.003	0.0633664	0.0975641	-0.062072	-0.127 to 0.009
LPC(19:0) [sn2] (a)		-0.0101724	-0.054 to 0.034	0.650087	0.997793	-0.0111409	-0.052 to 0.031	-0.14258	-0.22 to -0.066	0.000314058	0.000916198	-0.141412	-0.222 to -0.072
LPC(19:1) (a)		-0.0155322	-0.057 to 0.025	0.45778	0.997793	-0.0151073	-0.058 to 0.025	-0.132911	-0.204 to -0.062	0.000265019	0.000794033	-0.132553	-0.204 to -0.066
LPC(19:1) (b)		-0.0177546	-0.059 to 0.023	0.396848	0.997793	-0.0182354	-0.059 to 0.022	-0.14999	-0.222 to -0.078	5.10245e-05	0.000196015	-0.149019	-0.218 to -0.09
LPC(19:1) (c)		-0.0065711	-0.05 to 0.037	0.768541	0.997793	-0.00628777	-0.049 to 0.039	-0.141933	-0.218 to -0.066	0.00028665	0.00084578	-0.141175	-0.214 to -0.071
LPC(20:0) [sn1]		-0.020412	-0.056 to 0.015	0.26398	0.997793	-0.0201972	-0.055 to 0.016	-0.0500205	-0.113 to 0.013	0.121332	0.169341	-0.0469067	-0.114 to 0.012
LPC(20:0) [sn2]		-0.0148981	-0.051 to 0.021	0.418847	0.997793	-0.0148698	-0.05 to 0.018	-0.0615703	-0.125 to 0.002	0.0589071	0.0912414	-0.0600276	-0.128 to 0.005
LPC(20:1) [sn1]		-0.011027	-0.041 to 0.019	0.468129	0.997793	-0.0106949	-0.037 to 0.017	-0.0172573	-0.07 to 0.035	0.520912	0.591241	-0.0178937	-0.065 to 0.036
LPC(20:1) [sn2]		-0.000206495	-0.033 to 0.032	0.990089	0.997793	-5.66924e-05	-0.031 to 0.028	0.00388308	-0.054 to 0.061	0.89493	0.91257	0.00470706	-0.051 to 0.064
LPC(20:2) [sn1]		-0.00527501	-0.042 to 0.031	0.776955	0.997793	-0.00499491	-0.037 to 0.029	-0.0632624	-0.128 to 0.001	0.0546034	0.0850848	-0.0641252	-0.123 to -0.006
LPC(20:2) [sn2]		0.0014029	-0.038 to 0.041	0.944684	0.997793	0.00137242	-0.034 to 0.037	-0.0528308	-0.123 to 0.017	0.140601	0.191414	-0.0532062	-0.117 to 0.024
LPC(20:3) [sn1]		-0.0190628	-0.065 to 0.027	0.413306	0.997793	-0.0184595	-0.059 to 0.02	-0.084887	-0.165 to -0.005	0.0386013	0.0634632	-0.0845409	-0.163 to -0.008
LPC(20:3) [sn2]		-0.0162016	-0.062 to 0.03	0.491708	0.997793	-0.0165636	-0.058 to 0.022	-0.0657419	-0.147 to 0.016	0.114112	0.160603	-0.0668736	-0.141 to 0.009
LPC(20:4) [sn1]		-0.00997193	-0.055 to 0.035	0.661387	0.997793	-0.0116457	-0.047 to 0.033	-0.0869219	-0.165 to -0.009	0.029575	0.0500004	-0.0887506	-0.162 to -0.001
LPC(20:4) [sn2]		-0.00166528	-0.047 to 0.044	0.942799	0.997793	-0.00136061	-0.045 to 0.043	-0.0735865	-0.153 to 0.006	0.0709779	0.10633	-0.0730172	-0.155 to 0.004
LPC(20:5) [sn1]		-0.0094844	-0.055 to 0.036	0.68335	0.997793	-0.00974556	-0.058 to 0.036	-0.0264193	-0.107 to 0.054	0.521145	0.591241	-0.0256245	-0.104 to 0.057
LPC(20:5) [sn2]		-0.0135831	-0.059 to 0.032	0.560055	0.997793	-0.01363	-0.058 to 0.032	-0.0212701	-0.102 to 0.06	0.607075	0.664443	-0.0199716	-0.097 to 0.057
LPC(22:0) [sn1]		-0.0244807	-0.07 to 0.021	0.287034	0.997793	-0.0241001	-0.065 to 0.016	-0.0674877	-0.147 to 0.012	0.0979002	0.141736	-0.0637723	-0.151 to 0.006
LPC(22:0) [sn2]		-0.014519	-0.06 to 0.031	0.533318	0.997793	-0.0129221	-0.057 to 0.029	-0.0607682	-0.142 to 0.02	0.142021	0.193009	-0.0599434	-0.147 to 0.022
LPC(22:1) [sn1]		-0.0427038	-0.083 to -0.002	0.0398295	0.997793	-0.0432913	-0.083 to -0.002	-0.203511	-0.274 to -0.133	2.2024e-08	3.45097e-07	-0.204501	-0.261 to -0.138
LPC(22:1) [sn2]		-0.0251755	-0.067 to 0.017	0.238245	0.997793	-0.0264184	-0.063 to 0.02	-0.166112	-0.239 to -0.093	9.78553e-06	4.98024e-05	-0.163899	-0.234 to -0.098
LPC(22:4) [sn1]		-0.00971478	-0.051 to 0.032	0.644445	0.997793	-0.0100401	-0.053 to 0.028	-0.0679051	-0.141 to 0.005	0.0673534	0.102082	-0.0674413	-0.146 to 0.008
LPC(22:4) [sn2]		-0.00573641	-0.049 to 0.038	0.795587	0.997793	-0.00565897	-0.046 to 0.038	-0.0822073	-0.159 to -0.006	0.0357198	0.0588505	-0.0810315	-0.158 to -0.004
LPC(22:5) (n3) [sn1] [104_sn1]		-0.0289426	-0.074 to 0.016	0.206059	0.997793	-0.0295155	-0.071 to 0.015	-0.165014	-0.243 to -0.087	3.95275e-05	0.000161438	-0.165307	-0.249 to -0.087
LPC(22:5) [sn1] (n3)/LPC(22:5) [sn2] (n6)		-0.0210581	-0.066 to 0.024	0.359251	0.997793	-0.0214244	-0.063 to 0.024	-0.156217	-0.235 to -0.078	0.000109656	0.000379879	-0.156201	-0.238 to -0.083
LPC(22:5) [sn1] (n6)		-0.0205128	-0.066 to 0.025	0.376584	0.997793	-0.0206577	-0.068 to 0.024	-0.10471	-0.185 to -0.024	0.0109318	0.021368	-0.105901	-0.185 to -0.025
LPC(22:5) [sn2] (n3)		-0.0269665	-0.072 to 0.018	0.242436	0.997793	-0.0261537	-0.075 to 0.017	-0.159538	-0.238 to -0.081	8.30269e-05	0.000298282	-0.162006	-0.237 to -0.082
LPC(22:6) [sn1]		-0.0104531	-0.055 to 0.035	0.649101	0.997793	-0.0111209	-0.054 to 0.03	-0.112087	-0.191 to -0.033	0.00566976	0.0120872	-0.114357	-0.19 to -0.044
LPC(22:6) [sn2]		-0.00854649	-0.054 to 0.037	0.712488	0.997793	-0.00917355	-0.05 to 0.029	-0.110228	-0.19 to -0.03	0.00711608	0.0147255	-0.11111	-0.19 to -0.025
LPC(24:0) [sn1]		-0.019796	-0.066 to 0.026	0.402205	0.997793	-0.0192138	-0.061 to 0.027	1.52574e-05	-0.082 to 0.083	0.999711	0.999711	0.000239611	-0.082 to 0.084
LPC(24:0) [sn2]		-0.0162434	-0.063 to 0.03	0.493075	0.997793	-0.0150321	-0.059 to 0.027	0.00509539	-0.078 to 0.088	0.90402	0.920629	0.00669228	-0.079 to 0.09
LPC(26:0) [sn1]		-0.0179163	-0.066 to 0.03	0.463315	0.997793	-0.0191387	-0.06 to 0.026	-0.0247002	-0.109 to 0.06	0.567435	0.629761	-0.0251057	-0.106 to 0.061
LPC(26:0) [sn2]		-0.00219762	-0.05 to 0.045	0.927712	0.997793	-0.000774182	-0.047 to 0.042	-0.0241202	-0.108 to 0.06	0.573102	0.633524	-0.0234698	-0.109 to 0.065
LPC(O-16:0)		0.000611825	-0.031 to 0.032	0.969712	0.997793	-0.000151216	-0.029 to 0.029	-0.0225625	-0.078 to 0.033	0.425333	0.495583	-0.0220175	-0.079 to 0.033
LPC(O-18:0)		-0.007573	-0.046 to 0.031	0.698879	0.997793	-0.00758241	-0.047 to 0.023	-0.104731	-0.172 to -0.038	0.0023259	0.0054694	-0.103692	-0.177 to -0.046
LPC(O-18:1)		0.00696323	-0.02 to 0.034	0.61226	0.997793	0.00739282	-0.02 to 0.032	0.0114726	-0.036 to 0.059	0.636951	0.692261	0.0134376	-0.036 to 0.063
LPC(O-20:0)		-0.0075308	-0.049 to 0.034	0.725092	0.997793	-0.0075732	-0.047 to 0.032	-0.0921391	-0.166 to -0.019	0.0142463	0.0268328	-0.0912518	-0.168 to -0.021
LPC(O-20:1)		0.0333899	-0.001 to 0.068	0.0570193	0.997793	0.0336016	0 to 0.062	0.032737	-0.028 to 0.094	0.292827	0.361837	0.0326649	-0.029 to 0.099
LPC(O-22:0)		-0.00264262	-0.049 to 0.044	0.911925	0.997793	-0.00227838	-0.047 to 0.042	-0.0899311	-0.172 to -0.008	0.032722	0.0547247	-0.0898621	-0.173 to -0.005
LPC(O-22:1)		0.0339912	-0.01 to 0.078	0.13144	0.997793	0.0346403	-0.008 to 0.076	0.016601	-0.062 to 0.095	0.678114	0.727823	0.0165458	-0.06 to 0.1
LPC(O-24:0)		-6.11109e-06	-0.048 to 0.048	0.999799	0.999799	0.000671228	-0.047 to 0.046	-0.0202964	-0.104 to 0.064	0.636027	0.692226	-0.0206477	-0.118 to 0.067
LPC(O-24:1)		0.0262079	-0.021 to 0.073	0.273819	0.997793	0.0257153	-0.019 to 0.066	0.0266165	-0.057 to 0.11	0.532397	0.602245	0.0260607	-0.063 to 0.114
LPC(O-24:2)		0.0218513	-0.022 to 0.066	0.334133	0.997793	0.0217098	-0.027 to 0.069	0.0797835	0.001 to 0.158	0.0473632	0.0754699	0.0811154	-0.008 to 0.166
LPC(P-16:0)		-0.0295501	-0.062 to 0.003	0.0749489	0.997793	-0.0298395	-0.061 to 0.002	-0.158076	-0.214 to -0.102	4.66892e-08	6.35629e-07	-0.157762	-0.216 to -0.098
LPC(P-17:0) (a)		-0.0247737	-0.068 to 0.019	0.264661	0.997793	-0.0256244	-0.071 to 0.016	-0.207283	-0.283 to -0.132	1.04586e-07	1.14308e-06	-0.20685	-0.277 to -0.136
LPC(P-17:0) (b)		-0.0302265	-0.072 to 0.012	0.156799	0.997793	-0.0317258	-0.073 to 0.009	-0.222447	-0.294 to -0.151	2.34386e-09	5.05232e-08	-0.223193	-0.286 to -0.15
LPC(P-18:0)		-0.0370628	-0.078 to 0.004	0.076553	0.997793	-0.0365737	-0.077 to 0	-0.196966	-0.268 to -0.126	6.98842e-08	8.47346e-07	-0.196434	-0.268 to -0.127
LPC(P-18:1)		-0.0242136	-0.056 to 0.007	0.134919	0.997793	-0.0237	-0.057 to 0.003	-0.13127	-0.186 to -0.076	3.64697e-06	2.19383e-05	-0.131102	-0.184 to -0.074
LPC(P-20:0)		-0.0158082	-0.061 to 0.029	0.49203	0.997793	-0.0168191	-0.055 to 0.029	-0.246855	-0.324 to -0.17	7.1505e-10	2.13415e-08	-0.247405	-0.316 to -0.176
PE(15-MHDA_18:1)		-0.00394889	-0.051 to 0.043	0.869707	0.997793	-0.00272444	-0.052 to 0.041	-0.0267994	-0.111 to 0.057	0.532117	0.602245	-0.0264949	-0.106 to 0.052
PE(15-MHDA_18:2)		-0.00800784	-0.055 to 0.039	0.73842	0.997793	-0.00861454	-0.052 to 0.038	-0.017351	-0.101 to 0.066	0.683897	0.73296	-0.0161634	-0.1 to 0.065
PE(15-MHDA_20:4)		0.00423228	-0.042 to 0.05	0.85721	0.997793	0.00544707	-0.042 to 0.051	-0.0327725	-0.115 to 0.049	0.43244	0.500463	-0.0325468	-0.114 to 0.046
PE(15-MHDA_22:6)		0.0108906	-0.035 to 0.057	0.642191	0.997793	0.0116516	-0.039 to 0.051	-0.0395294	-0.121 to 0.042	0.34285	0.411845	-0.0411093	-0.112 to 0.041
PE(16:0_16:0)		-0.0267153	-0.073 to 0.019	0.255018	0.997793	-0.0272218	-0.072 to 0.02	0.0233552	-0.058 to 0.105	0.573111	0.633524	0.0206633	-0.054 to 0.114
PE(16:0_16:1)		-0.00174936	-0.049 to 0.045	0.941973	0.997793	-0.00126082	-0.048 to 0.042	0.0677976	-0.015 to 0.151	0.110936	0.157379	0.0682805	-0.013 to 0.152
PE(16:0_18:1)		-0.000178838	-0.046 to 0.046	0.993936	0.997793	-6.97887e-06	-0.049 to 0.05	0.202443	0.122 to 0.283	9.82158e-07	7.32841e-06	0.203081	0.114 to 0.289
PE(16:0_18:2)		-0.00632344	-0.052 to 0.039	0.785578	0.997793	-0.00562809	-0.047 to 0.04	0.1778	0.098 to 0.257	1.43425e-05	6.9129e-05	0.179387	0.081 to 0.258
PE(16:0_18:3) (a)		0.00384607	-0.042 to 0.05	0.870783	0.997793	0.00475885	-0.045 to 0.05	0.143297	0.062 to 0.224	0.000577093	0.00158803	0.145361	0.056 to 0.236
PE(16:0_18:3) (b)		-0.0110607	-0.057 to 0.035	0.636518	0.997793	-0.0108332	-0.06 to 0.029	0.181703	0.102 to 0.261	9.81929e-06	4.98024e-05	0.184348	0.088 to 0.268
PE(16:0_20:3)		-0.0160662	-0.063 to 0.031	0.504096	0.997793	-0.0164538	-0.061 to 0.026	0.0936294	0.01 to 0.177	0.0281793	0.0480596	0.096758	0.004 to 0.175
PE(16:0_20:4)		0.0130503	-0.033 to 0.06	0.582415	0.997793	0.0146336	-0.033 to 0.053	0.201957	0.121 to 0.283	1.31788e-06	9.38235e-06	0.203312	0.116 to 0.292
PE(16:0_20:5)		-0.00369856	-0.05 to 0.043	0.876275	0.997793	-0.00363814	-0.051 to 0.04	0.0941739	0.012 to 0.176	0.0253396	0.044098	0.0945644	0.013 to 0.183
PE(16:0_22:6)		0.029741	-0.017 to 0.076	0.208327	0.997793	0.0304929	-0.013 to 0.075	0.170538	0.089 to 0.252	4.61219e-05	0.000180761	0.170193	0.097 to 0.248
PE(16:1_18:2)		-0.0278014	-0.075 to 0.019	0.244431	0.997793	-0.0272187	-0.07 to 0.014	0.0477419	-0.035 to 0.131	0.25955	0.326965	0.0483916	-0.036 to 0.134
PE(16:1_20:4)		-0.024782	-0.071 to 0.022	0.297985	0.997793	-0.024719	-0.07 to 0.017	0.0944474	0.012 to 0.177	0.0250117	0.0438129	0.0954309	0.012 to 0.185
PE(17:0_18:1)		-0.0111372	-0.058 to 0.036	0.643229	0.997793	-0.0121465	-0.054 to 0.034	0.119224	0.036 to 0.202	0.00514787	0.0110658	0.119512	0.043 to 0.209
PE(17:0_18:2)		-0.0178228	-0.064 to 0.029	0.452154	0.997793	-0.0168594	-0.061 to 0.026	0.123772	0.042 to 0.205	0.00311914	0.0070981	0.124668	0.029 to 0.218
PE(17:0_20:4)		-0.00396758	-0.051 to 0.043	0.868197	0.997793	-0.00355779	-0.049 to 0.042	0.0938053	0.011 to 0.177	0.0272244	0.0466361	0.0953781	0.011 to 0.178
PE(17:0_22:6)		0.00963972	-0.036 to 0.055	0.679553	0.997793	0.00827496	-0.033 to 0.054	0.0634374	-0.018 to 0.145	0.126018	0.174937	0.0630463	-0.008 to 0.136
PE(18:0_18:1)		-0.0076367	-0.054 to 0.039	0.748221	0.997793	-0.00798709	-0.051 to 0.038	0.178269	0.097 to 0.26	2.12172e-05	9.5724e-05	0.177785	0.095 to 0.259
PE(18:0_18:2)		-0.0111773	-0.057 to 0.035	0.634175	0.997793	-0.011016	-0.057 to 0.035	0.173932	0.094 to 0.254	2.57469e-05	0.000111618	0.174383	0.086 to 0.253
PE(18:0_20:3) (a)		0.00419821	-0.042 to 0.051	0.859636	0.997793	0.00492162	-0.038 to 0.052	0.20838	0.127 to 0.289	6.0466e-07	4.88767e-06	0.209393	0.123 to 0.279
PE(18:0_20:3) (b)		-0.005617	-0.052 to 0.04	0.811367	0.997793	-0.00558217	-0.052 to 0.04	0.0955273	0.014 to 0.177	0.0219664	0.039186	0.0970935	0.015 to 0.17
PE(18:0_20:4)		0.0103086	-0.036 to 0.057	0.664332	0.997793	0.0120594	-0.039 to 0.049	0.22127	0.141 to 0.302	9.81086e-08	1.0876e-06	0.222789	0.137 to 0.304
PE(18:0_22:4)		0.0178822	-0.027 to 0.063	0.436407	0.997793	0.0171616	-0.021 to 0.065	0.148942	0.07 to 0.228	0.000237424	0.000725359	0.148631	0.07 to 0.229
PE(18:0_22:5) (n3)		0.000692632	-0.045 to 0.047	0.976539	0.997793	0.000400708	-0.042 to 0.044	0.0606326	-0.021 to 0.142	0.146194	0.197642	0.0632184	-0.018 to 0.146
PE(18:0_22:5) (n6)		0.0210335	-0.026 to 0.068	0.377364	0.997793	0.0205833	-0.022 to 0.073	0.180974	0.099 to 0.263	1.64327e-05	7.77549e-05	0.179576	0.096 to 0.275
PE(18:0_22:6)		0.0276255	-0.018 to 0.073	0.238277	0.997793	0.0277396	-0.013 to 0.073	0.188348	0.108 to 0.268	5.07741e-06	2.81434e-05	0.188087	0.111 to 0.266
PE(18:1_18:1)		-0.00718171	-0.054 to 0.039	0.761543	0.997793	-0.0054007	-0.054 to 0.04	0.16172	0.08 to 0.243	0.000109075	0.000379562	0.163755	0.077 to 0.251
PE(18:1_18:2)		-0.0158859	-0.062 to 0.03	0.501333	0.997793	-0.0155945	-0.067 to 0.03	0.129001	0.047 to 0.211	0.00203394	0.00487141	0.128771	0.042 to 0.22
PE(18:1_22:6) (a)		0.00441289	-0.043 to 0.051	0.854153	0.997793	0.00370396	-0.042 to 0.052	0.118266	0.035 to 0.202	0.00561652	0.0120067	0.115856	0.042 to 0.202
PE(18:1_22:6) (b)		0.00715829	-0.039 to 0.053	0.761678	0.997793	0.00792647	-0.042 to 0.05	0.00968266	-0.072 to 0.092	0.817343	0.845678	0.00892836	-0.071 to 0.091
PE(20:0_20:4)		0.00228982	-0.037 to 0.041	0.908806	0.997793	0.00260836	-0.032 to 0.038	0.151132	0.083 to 0.22	1.77141e-05	8.31073e-05	0.152089	0.082 to 0.215
PE(36:0)		0.00974533	-0.037 to 0.057	0.685596	0.997793	0.0102352	-0.03 to 0.048	0.0836804	-0.001 to 0.168	0.052039	0.0819083	0.0824176	0.011 to 0.171
PE(38:5) (a)		-0.00147246	-0.049 to 0.046	0.951106	0.997793	-0.00122658	-0.048 to 0.047	0.0943101	0.011 to 0.177	0.0260585	0.0451371	0.0958325	0.011 to 0.179
PE(38:5) (b)		0.0146056	-0.032 to 0.061	0.540453	0.997793	0.0145894	-0.032 to 0.064	0.105503	0.023 to 0.188	0.0125189	0.0240071	0.104231	0.028 to 0.197
PE(O-16:0/18:2)		-0.0161231	-0.063 to 0.031	0.503165	0.997793	-0.0165943	-0.064 to 0.035	-0.161382	-0.244 to -0.079	0.000147147	0.000485899	-0.160854	-0.259 to -0.074
PE(O-16:0/20:3)		-0.016993	-0.063 to 0.029	0.473715	0.997793	-0.0176227	-0.065 to 0.033	-0.188957	-0.27 to -0.108	5.80514e-06	3.19489e-05	-0.186331	-0.272 to -0.113
PE(O-16:0/20:4)		-0.00407601	-0.051 to 0.043	0.865289	0.997793	-0.00482319	-0.057 to 0.048	-0.21556	-0.297 to -0.134	2.79649e-07	2.466e-06	-0.21527	-0.301 to -0.129
PE(O-16:0/22:4)		-0.00538221	-0.053 to 0.042	0.823009	0.997793	-0.00679716	-0.056 to 0.048	-0.16491	-0.247 to -0.083	9.25984e-05	0.000329616	-0.165357	-0.239 to -0.082
PE(O-16:0/22:6)		0.00979821	-0.037 to 0.056	0.679174	0.997793	0.00803414	-0.035 to 0.053	-0.214885	-0.295 to -0.135	1.84869e-07	1.79323e-06	-0.215057	-0.298 to -0.132
PE(O-18:0/20:4)		-0.0144053	-0.06 to 0.032	0.539239	0.997793	-0.0148823	-0.06 to 0.034	-0.191445	-0.271 to -0.112	3.01954e-06	1.87453e-05	-0.192726	-0.266 to -0.114
PE(O-18:0/22:5)		-0.0161015	-0.061 to 0.029	0.487108	0.997793	-0.0170197	-0.064 to 0.031	-0.198741	-0.277 to -0.12	1.0051e-06	7.42815e-06	-0.198726	-0.274 to -0.128
PE(O-18:0/22:6)		-0.0147812	-0.06 to 0.031	0.524235	0.997793	-0.0166664	-0.061 to 0.031	-0.216334	-0.295 to -0.138	9.20212e-08	1.0349e-06	-0.217788	-0.284 to -0.139
PE(O-18:1/18:2)		-0.0107523	-0.058 to 0.036	0.652494	0.997793	-0.0114984	-0.054 to 0.039	-0.185953	-0.268 to -0.104	9.6039e-06	4.93551e-05	-0.183724	-0.283 to -0.102
PE(O-18:1/22:6)		-0.00291919	-0.049 to 0.043	0.900288	0.997793	-0.00376358	-0.046 to 0.046	-0.210737	-0.29 to -0.132	2.33646e-07	2.23839e-06	-0.211615	-0.288 to -0.138
PE(O-34:1)		-0.0269913	-0.073 to 0.019	0.255208	0.997793	-0.0276047	-0.075 to 0.023	-0.21438	-0.295 to -0.134	2.47072e-07	2.28247e-06	-0.211847	-0.296 to -0.139
PE(O-36:5)		-0.000284438	-0.046 to 0.045	0.990281	0.997793	-0.000116793	-0.042 to 0.046	-0.206111	-0.285 to -0.127	4.16853e-07	3.5547e-06	-0.207926	-0.278 to -0.124
PE(O-38:5) (a)		-0.0061693	-0.052 to 0.04	0.793486	0.997793	-0.00587727	-0.053 to 0.042	-0.220256	-0.3 to -0.141	8.37056e-08	9.69485e-07	-0.218167	-0.299 to -0.147
PE(O-38:5) (b)		-0.0139075	-0.06 to 0.032	0.552794	0.997793	-0.0117112	-0.063 to 0.027	-0.204659	-0.284 to -0.125	6.45428e-07	5.16342e-06	-0.201532	-0.286 to -0.123
PE(P-15:0/20:4) (a)		0.0467619	0 to 0.093	0.0481581	0.997793	0.0471405	-0.01 to 0.09	0.121065	0.039 to 0.203	0.004105	0.00910137	0.123741	0.03 to 0.209
PE(P-15:0/20:4) (b)		0.00786427	-0.039 to 0.055	0.744348	0.997793	0.00847103	-0.041 to 0.062	0.0412611	-0.043 to 0.125	0.336198	0.405108	0.0409256	-0.044 to 0.134
PE(P-15:0/22:6) (a)		0.0325803	-0.013 to 0.078	0.163909	0.997793	0.0337133	-0.016 to 0.078	0.105339	0.024 to 0.187	0.0115229	0.0224668	0.108669	0.011 to 0.189
PE(P-15:0/22:6) (b)		0.0150435	-0.031 to 0.061	0.519364	0.997793	0.0156249	-0.029 to 0.056	-0.134916	-0.215 to -0.054	0.00108797	0.00275903	-0.134142	-0.215 to -0.062
PE(P-16:0/18:1)		-0.0339657	-0.08 to 0.012	0.152399	0.997793	-0.0321612	-0.08 to 0.012	-0.104883	-0.187 to -0.023	0.0125295	0.0240071	-0.104703	-0.192 to -0.03
PE(P-16:0/18:2)		-0.0265974	-0.074 to 0.021	0.269897	0.997793	-0.0263302	-0.077 to 0.023	-0.0702177	-0.154 to 0.014	0.101996	0.146301	-0.0693991	-0.178 to 0.014
PE(P-16:0/18:3)		-0.0156817	-0.063 to 0.031	0.514339	0.997793	-0.015454	-0.06 to 0.025	-0.0777431	-0.161 to 0.006	0.0690277	0.104011	-0.0761522	-0.163 to 0.01
PE(P-16:0/20:3) (a)		-0.0143777	-0.061 to 0.032	0.54326	0.997793	-0.0140744	-0.058 to 0.033	-0.154762	-0.236 to -0.073	0.000209855	0.000648796	-0.155639	-0.232 to -0.072
PE(P-16:0/20:3) (b)		-0.0223324	-0.068 to 0.024	0.340038	0.997793	-0.0221044	-0.066 to 0.02	-0.125372	-0.206 to -0.045	0.00239279	0.005576	-0.124524	-0.205 to -0.04
PE(P-16:0/20:4)		-0.00330154	-0.049 to 0.042	0.887641	0.997793	-0.00449102	-0.044 to 0.041	-0.141762	-0.221 to -0.062	0.000525053	0.00145515	-0.142245	-0.225 to -0.055
PE(P-16:0/20:5)		-0.00264618	-0.048 to 0.043	0.90878	0.997793	-0.00323777	-0.047 to 0.043	-0.141999	-0.221 to -0.063	0.000476271	0.00133908	-0.140514	-0.219 to -0.068
PE(P-16:0/22:4)		-0.0110197	-0.056 to 0.034	0.632754	0.997793	-0.0111492	-0.057 to 0.035	-0.121336	-0.201 to -0.042	0.00295923	0.00677393	-0.119395	-0.195 to -0.043
PE(P-16:0/22:5) (n3)		-0.0323457	-0.078 to 0.013	0.165278	0.997793	-0.0327358	-0.079 to 0.016	-0.215944	-0.295 to -0.137	1.20775e-07	1.30168e-06	-0.215909	-0.296 to -0.137
PE(P-16:0/22:5) (n6)		-0.0269411	-0.074 to 0.02	0.259236	0.997793	-0.0271723	-0.077 to 0.023	-0.148319	-0.231 to -0.066	0.000443788	0.00125686	-0.148982	-0.224 to -0.06
PE(P-16:0/22:6)		0.00776695	-0.038 to 0.053	0.738914	0.997793	0.00695881	-0.033 to 0.055	-0.167589	-0.247 to -0.088	4.13171e-05	0.000166125	-0.168884	-0.248 to -0.091
PE(P-17:0/20:4) (a)		0.00313306	-0.042 to 0.048	0.891455	0.997793	0.00405215	-0.042 to 0.045	-0.157864	-0.236 to -0.079	8.98769e-05	0.000321403	-0.155318	-0.238 to -0.089
PE(P-17:0/20:4) (b)		-0.00214591	-0.047 to 0.043	0.925998	0.997793	-0.00119572	-0.043 to 0.041	-0.15519	-0.234 to -0.076	0.000124674	0.00042433	-0.153643	-0.229 to -0.075
PE(P-17:0/22:6) (a)		0.003543	-0.041 to 0.048	0.876875	0.997793	0.00468227	-0.045 to 0.045	-0.16211	-0.24 to -0.084	5.41762e-05	0.000205077	-0.163771	-0.228 to -0.083
PE(P-17:0/22:6) (b)		-0.00597975	-0.051 to 0.039	0.794958	0.997793	-0.00689967	-0.052 to 0.039	-0.177809	-0.256 to -0.099	1.06035e-05	5.24099e-05	-0.176736	-0.255 to -0.097
PE(P-18:0/18:1)		-0.0226682	-0.069 to 0.024	0.339509	0.997793	-0.0233893	-0.07 to 0.019	-0.142708	-0.224 to -0.062	0.000603646	0.00165523	-0.144398	-0.22 to -0.057
PE(P-18:0/18:2)		-0.0295404	-0.077 to 0.018	0.222954	0.997793	-0.0289662	-0.075 to 0.013	-0.121478	-0.205 to -0.038	0.00462137	0.0101019	-0.121832	-0.231 to -0.04
PE(P-18:0/18:3)		-0.0202196	-0.067 to 0.027	0.400138	0.997793	-0.0205801	-0.067 to 0.026	-0.093553	-0.177 to -0.01	0.0288935	0.0491696	-0.0929156	-0.18 to 0.01
PE(P-18:0/20:3) (a)		-0.020106	-0.066 to 0.026	0.390925	0.997793	-0.0207648	-0.063 to 0.023	-0.18629	-0.266 to -0.106	6.11962e-06	3.3109e-05	-0.184037	-0.266 to -0.111
PE(P-18:0/20:3) (b)		-0.0220506	-0.067 to 0.023	0.340241	0.997793	-0.0222173	-0.067 to 0.022	-0.146936	-0.226 to -0.068	0.00031363	0.000916198	-0.145373	-0.223 to -0.069
PE(P-18:0/20:4)		8.39984e-05	-0.045 to 0.045	0.997073	0.998374	-0.000784758	-0.04 to 0.039	-0.155312	-0.233 to -0.078	9.86554e-05	0.000349574	-0.154532	-0.229 to -0.084
PE(P-18:0/20:5)		-0.00581935	-0.051 to 0.039	0.799827	0.997793	-0.00562818	-0.051 to 0.035	-0.160088	-0.238 to -0.082	7.13835e-05	0.000260064	-0.160665	-0.237 to -0.073
PE(P-18:0/22:4)		-0.00683727	-0.05 to 0.037	0.757605	0.997793	-0.00814576	-0.049 to 0.032	-0.123725	-0.199 to -0.048	0.00143492	0.0035575	-0.124285	-0.192 to -0.05
PE(P-18:0/22:5) (n3)		-0.0207151	-0.066 to 0.024	0.369193	0.997793	-0.020474	-0.066 to 0.028	-0.191074	-0.27 to -0.113	2.37686e-06	1.55438e-05	-0.190926	-0.271 to -0.117
PE(P-18:0/22:5) (n6)		-0.0231161	-0.069 to 0.023	0.328395	0.997793	-0.0227823	-0.068 to 0.022	-0.183635	-0.264 to -0.103	9.99343e-06	5.03565e-05	-0.185431	-0.263 to -0.097
PE(P-18:0/22:6)		-0.00776744	-0.053 to 0.037	0.734064	0.997793	-0.0077825	-0.052 to 0.033	-0.168543	-0.246 to -0.091	2.55743e-05	0.000111493	-0.169357	-0.239 to -0.096
PE(P-18:1/18:1)		-0.0332897	-0.08 to 0.013	0.159901	0.997793	-0.0334411	-0.077 to 0.011	-0.210459	-0.291 to -0.13	4.24473e-07	3.56646e-06	-0.211201	-0.291 to -0.132
PE(P-18:1/18:1) (a)		-0.0342522	-0.081 to 0.012	0.14912	0.997793	-0.033424	-0.077 to 0.006	-0.203347	-0.284 to -0.122	1.13072e-06	8.20037e-06	-0.202539	-0.288 to -0.124
PE(P-18:1/18:1) (b)		-0.0185017	-0.065 to 0.028	0.431339	0.997793	-0.017575	-0.065 to 0.023	-0.189048	-0.269 to -0.109	4.92743e-06	2.75085e-05	-0.187935	-0.272 to -0.113
PE(P-18:1/18:2) (a)		-0.0293018	-0.076 to 0.017	0.219883	0.997793	-0.0289613	-0.07 to 0.015	-0.14386	-0.226 to -0.061	0.000681744	0.00186279	-0.140409	-0.242 to -0.06
PE(P-18:1/18:2) (b)		-0.0216194	-0.068 to 0.025	0.363356	0.997793	-0.0226326	-0.068 to 0.023	-0.192172	-0.274 to -0.111	4.56906e-06	2.62636e-05	-0.192505	-0.277 to -0.113
PE(P-18:1/18:3)		-0.022229	-0.069 to 0.025	0.354764	0.997793	-0.0219848	-0.067 to 0.019	-0.169458	-0.252 to -0.087	6.59751e-05	0.000242638	-0.167194	-0.262 to -0.083
PE(P-18:1/20:3) (a)		-0.0224832	-0.069 to 0.024	0.339438	0.997793	-0.0225294	-0.067 to 0.023	-0.190576	-0.271 to -0.11	4.49289e-06	2.60185e-05	-0.190403	-0.263 to -0.109
PE(P-18:1/20:3) (b)		-0.020044	-0.066 to 0.026	0.390164	0.997793	-0.0198824	-0.064 to 0.024	-0.18301	-0.263 to -0.103	8.46209e-06	4.4071e-05	-0.181117	-0.266 to -0.112
PE(P-18:1/20:4) (a)		-0.010603	-0.057 to 0.035	0.651797	0.997793	-0.0115713	-0.054 to 0.033	-0.196728	-0.276 to -0.117	1.53218e-06	1.05219e-05	-0.195145	-0.281 to -0.123
PE(P-18:1/20:4) (b)		-0.0079366	-0.053 to 0.037	0.731953	0.997793	-0.00929083	-0.053 to 0.036	-0.168734	-0.248 to -0.09	3.34165e-05	0.00014093	-0.169207	-0.238 to -0.081
PE(P-18:1/20:5) (a)		-0.011123	-0.057 to 0.034	0.632587	0.997793	-0.0112325	-0.055 to 0.037	-0.167804	-0.247 to -0.088	4.04725e-05	0.000163576	-0.169427	-0.248 to -0.088
PE(P-18:1/20:5) (b)		-0.0171204	-0.062 to 0.028	0.458083	0.997793	-0.0180047	-0.064 to 0.027	-0.16577	-0.245 to -0.087	4.77471e-05	0.000186041	-0.164623	-0.248 to -0.088
PE(P-18:1/22:4)		-0.0209584	-0.068 to 0.026	0.382413	0.997793	-0.0213497	-0.068 to 0.023	-0.242579	-0.323 to -0.162	6.81993e-09	1.35699e-07	-0.242152	-0.324 to -0.167
PE(P-18:1/22:5) (a)		-0.0241617	-0.07 to 0.021	0.297619	0.997793	-0.0239283	-0.07 to 0.019	-0.221516	-0.3 to -0.143	5.00505e-08	6.69641e-07	-0.223303	-0.296 to -0.133
PE(P-18:1/22:5) (b)		-0.0330963	-0.08 to 0.013	0.163158	0.997793	-0.0325957	-0.08 to 0.009	-0.218468	-0.299 to -0.138	1.71219e-07	1.72257e-06	-0.218453	-0.295 to -0.137
PE(P-18:1/22:6) (a)		-0.00143219	-0.047 to 0.044	0.951094	0.997793	-0.00184294	-0.042 to 0.044	-0.180948	-0.261 to -0.101	1.01507e-05	5.08192e-05	-0.180915	-0.258 to -0.107
PE(P-18:1/22:6) (b)		-0.0033427	-0.048 to 0.042	0.884562	0.997793	-0.00384197	-0.044 to 0.04	-0.18294	-0.261 to -0.104	6.14393e-06	3.3109e-05	-0.183202	-0.259 to -0.104
PE(P-19:0/20:4) (a)		0.00117286	-0.044 to 0.046	0.959214	0.997793	0.00159736	-0.043 to 0.044	-0.141395	-0.22 to -0.063	0.000440532	0.00125581	-0.139486	-0.223 to -0.063
PE(P-19:0/20:4) (b)		0.012638	-0.033 to 0.058	0.587303	0.997793	0.0136978	-0.028 to 0.051	-0.137617	-0.217 to -0.059	0.000694226	0.00189024	-0.135114	-0.215 to -0.066
PE(P-20:0/18:1)		-0.000822224	-0.048 to 0.046	0.972841	0.997793	0.000729579	-0.045 to 0.047	0.013358	-0.071 to 0.097	0.755643	0.79671	0.0145882	-0.071 to 0.104
PE(P-20:0/18:2)		0.000634284	-0.046 to 0.047	0.978828	0.997793	0.000105707	-0.047 to 0.051	0.0104223	-0.073 to 0.094	0.806952	0.837158	0.00893754	-0.091 to 0.096
PE(P-20:0/20:4)		0.0190311	-0.027 to 0.065	0.417159	0.997793	0.0190672	-0.02 to 0.06	-0.0831608	-0.164 to -0.003	0.0430233	0.0693802	-0.0823984	-0.157 to 0.001
PE(P-20:0/22:6)		0.0286746	-0.017 to 0.075	0.223073	0.997793	0.0288546	-0.008 to 0.067	-0.0408802	-0.122 to 0.04	0.32405	0.392911	-0.041183	-0.112 to 0.031
PE(P-20:1/20:4)		0.0841762	0.038 to 0.13	0.000385709	0.29931	0.0854026	0.04 to 0.131	0.203539	0.123 to 0.284	1.07413e-06	7.86341e-06	0.202889	0.119 to 0.279
PE(P-20:1/22:6)		0.0644201	0.019 to 0.11	0.00590163	0.997793	0.0655769	0.02 to 0.104	0.103862	0.023 to 0.184	0.0118069	0.0229627	0.104098	0.028 to 0.18
LPE(16:0) [sn1]		-0.0147448	-0.06 to 0.031	0.527712	0.997793	-0.016256	-0.061 to 0.027	-0.107112	-0.187 to -0.027	0.00885337	0.0177985	-0.10883	-0.189 to -0.03
LPE(16:0) [sn2]		0.00487368	-0.041 to 0.051	0.83573	0.997793	0.00586177	-0.047 to 0.044	-0.110229	-0.191 to -0.03	0.00746574	0.0153265	-0.109645	-0.192 to -0.028
LPE(17:0) [sn1]		0.029874	-0.017 to 0.077	0.213385	0.997793	0.0290348	-0.015 to 0.076	0.0518542	-0.032 to 0.136	0.227018	0.291665	0.0533008	-0.028 to 0.14
LPE(17:0) [sn2]		-0.00337551	-0.05 to 0.043	0.887297	0.997793	-0.00385491	-0.048 to 0.043	-0.043959	-0.127 to 0.039	0.300077	0.367287	-0.0441721	-0.124 to 0.033
LPE(18:0) [sn1]		-0.00451464	-0.044 to 0.035	0.821728	0.997793	-0.00454548	-0.045 to 0.035	0.0336105	-0.035 to 0.102	0.338374	0.407098	0.0335266	-0.03 to 0.101
LPE(18:0) [sn2]		0.00506324	-0.035 to 0.045	0.804711	0.997793	0.00459118	-0.033 to 0.046	0.0330985	-0.037 to 0.104	0.357807	0.428485	0.034365	-0.03 to 0.097
LPE(18:1) [sn1]		-0.0234594	-0.069 to 0.022	0.313489	0.997793	-0.0236044	-0.072 to 0.022	-0.0429937	-0.124 to 0.038	0.298443	0.366443	-0.0416895	-0.116 to 0.034
LPE(18:1) [sn2]		-0.0237894	-0.07 to 0.022	0.310233	0.997793	-0.0248355	-0.074 to 0.027	-0.035265	-0.117 to 0.046	0.397147	0.468368	-0.0347316	-0.109 to 0.044
LPE(18:2) [sn1]		-0.0397807	-0.086 to 0.006	0.0925438	0.997793	-0.0410135	-0.086 to 0.004	-0.131966	-0.214 to -0.05	0.00161026	0.00393111	-0.132539	-0.208 to -0.042
LPE(18:2) [sn2]		-0.0346667	-0.081 to 0.012	0.143177	0.997793	-0.0352908	-0.081 to 0.014	-0.128043	-0.21 to -0.046	0.00223517	0.00529525	-0.12856	-0.208 to -0.038
LPE(20:4) [sn1]		-0.0170914	-0.064 to 0.029	0.471375	0.997793	-0.0177541	-0.065 to 0.027	-0.0666106	-0.148 to 0.015	0.111348	0.157676	-0.0631863	-0.154 to 0.014
LPE(20:4) [sn2]		-0.0103578	-0.057 to 0.036	0.662926	0.997793	-0.0109216	-0.056 to 0.038	-0.05478	-0.137 to 0.027	0.191118	0.250944	-0.0573159	-0.134 to 0.027
LPE(22:6) [sn1]		-0.0108932	-0.057 to 0.035	0.643915	0.997793	-0.0130242	-0.053 to 0.035	-0.0736636	-0.155 to 0.008	0.0762333	0.113211	-0.0738735	-0.148 to 0.005
LPE(22:6) [sn2]		-0.00369865	-0.05 to 0.043	0.875727	0.997793	-0.0027726	-0.05 to 0.036	-0.0474398	-0.129 to 0.034	0.255156	0.322477	-0.046369	-0.131 to 0.036
LPE(P-16:0)		0.00267809	-0.03 to 0.035	0.870854	0.997793	0.00289247	-0.03 to 0.034	0.0101408	-0.047 to 0.067	0.727602	0.771338	0.00978895	-0.056 to 0.067
LPE(P-18:0)		-0.00102978	-0.038 to 0.036	0.956018	0.997793	-0.000441851	-0.036 to 0.029	-0.0728648	-0.137 to -0.009	0.0265421	0.0456689	-0.0724762	-0.143 to -0.009
LPE(P-18:1)		0.0131458	-0.021 to 0.047	0.445489	0.997793	0.0132311	-0.019 to 0.042	-0.00962404	-0.069 to 0.05	0.751829	0.793768	-0.00703637	-0.08 to 0.048
LPE(P-20:0)		0.00803393	-0.031 to 0.047	0.686971	0.997793	0.0076452	-0.031 to 0.045	-0.0214258	-0.091 to 0.048	0.546179	0.613364	-0.0199793	-0.089 to 0.044
PI (38:5) (b)		0.00322761	-0.044 to 0.05	0.892586	0.997793	0.00336544	-0.043 to 0.045	-0.119642	-0.202 to -0.038	0.00443928	0.00978659	-0.118242	-0.201 to -0.043
PI(15-MHDA_20:4)\PI(17:0_20:4)		-0.002859	-0.049 to 0.044	0.904344	0.997793	-0.0030207	-0.055 to 0.045	-0.136062	-0.218 to -0.054	0.00117642	0.00297361	-0.135971	-0.213 to -0.054
PI(16:0_16:1)		-0.0104513	-0.057 to 0.036	0.661583	0.997793	-0.00806947	-0.06 to 0.038	0.021056	-0.062 to 0.104	0.61912	0.676673	0.0195085	-0.067 to 0.107
PI(16:0_20:3) (a)		-0.0310714	-0.078 to 0.015	0.191212	0.997793	-0.0298629	-0.081 to 0.014	-0.0600476	-0.143 to 0.023	0.154835	0.208236	-0.0604307	-0.149 to 0.024
PI(16:0_20:3) (b)		-0.03541	-0.082 to 0.012	0.139627	0.997793	-0.0351133	-0.085 to 0.015	-0.0645967	-0.148 to 0.019	0.129166	0.177403	-0.0626672	-0.157 to 0.027
PI(16:0_20:4)		8.81502e-05	-0.047 to 0.047	0.997087	0.998374	-0.000137131	-0.05 to 0.05	-0.0900093	-0.174 to -0.006	0.0354122	0.0584679	-0.0912507	-0.179 to -0.004
PI(16:0/16:0)		0.0118363	-0.035 to 0.059	0.622271	0.997793	0.0125873	-0.04 to 0.056	0.00726733	-0.076 to 0.091	0.864226	0.885918	0.00774573	-0.087 to 0.099
PI(17:0_18:1)		-0.0225157	-0.069 to 0.024	0.338949	0.997793	-0.022575	-0.069 to 0.022	-0.0567317	-0.139 to 0.026	0.178253	0.236452	-0.0563089	-0.138 to 0.026
PI(17:0_18:2)		-0.0127157	-0.06 to 0.034	0.597473	0.997793	-0.0133839	-0.059 to 0.031	0.0819668	-0.001 to 0.165	0.0521426	0.0819083	0.0834551	-0.008 to 0.174
PI(18:0_18:1)		-0.0429677	-0.09 to 0.004	0.0751316	0.997793	-0.0432369	-0.089 to 0.007	-0.0325407	-0.117 to 0.052	0.449127	0.516329	-0.0314416	-0.119 to 0.046
PI(18:0_20:2)		-0.043164	-0.09 to 0.003	0.0691562	0.997793	-0.0441309	-0.088 to 0.002	-0.0775701	-0.16 to 0.005	0.0651182	0.0994719	-0.0744804	-0.175 to 0.003
PI(18:0_20:3) (a)		-0.0243035	-0.07 to 0.022	0.299833	0.997793	-0.0236497	-0.074 to 0.023	-0.110259	-0.191 to -0.029	0.00779873	0.0159258	-0.108337	-0.185 to -0.043
PI(18:0_20:3) (b)		-0.036963	-0.083 to 0.009	0.118727	0.997793	-0.0373999	-0.085 to 0.011	-0.173387	-0.255 to -0.092	3.48281e-05	0.000145304	-0.175086	-0.255 to -0.092
PI(18:0_20:4)		-0.0231902	-0.07 to 0.024	0.335203	0.997793	-0.0239035	-0.069 to 0.027	-0.143411	-0.226 to -0.061	0.000723023	0.00195493	-0.142249	-0.229 to -0.067
PI(18:0_22:4)		-0.0177045	-0.064 to 0.029	0.455895	0.997793	-0.0174899	-0.067 to 0.026	-0.132052	-0.214 to -0.05	0.00161095	0.00393111	-0.130613	-0.216 to -0.037
PI(18:0_22:5) (n3)		-0.0232074	-0.069 to 0.022	0.319704	0.997793	-0.0232297	-0.07 to 0.023	-0.105131	-0.186 to -0.025	0.0108559	0.0212733	-0.106292	-0.19 to -0.023
PI(18:0_22:5) (n6)		-0.0299258	-0.077 to 0.017	0.214002	0.997793	-0.0291677	-0.082 to 0.024	-0.0991376	-0.183 to -0.016	0.0203489	0.0365526	-0.0991191	-0.18 to -0.019
PI(18:0_22:6)		-0.00404135	-0.05 to 0.042	0.863967	0.997793	-0.0047845	-0.042 to 0.04	0.0352206	-0.047 to 0.117	0.400599	0.471007	0.0352925	-0.048 to 0.112
PI(18:1_18:2)		-0.0270156	-0.073 to 0.019	0.246506	0.997793	-0.0268913	-0.076 to 0.02	0.0769481	-0.004 to 0.158	0.0637564	0.097947	0.0770755	-0.013 to 0.163
PI(20:0_20:4)		0.0015258	-0.045 to 0.048	0.948234	0.997793	0.00137438	-0.037 to 0.05	0.030467	-0.051 to 0.112	0.466582	0.534812	0.0299376	-0.049 to 0.122
PI(34:0)		-0.00271453	-0.05 to 0.044	0.909515	0.997793	-0.00348402	-0.047 to 0.045	-0.00159793	-0.084 to 0.081	0.96983	0.976119	-0.00373405	-0.086 to 0.088
PI(34:1)		-0.0235501	-0.07 to 0.023	0.323476	0.997793	-0.0232022	-0.073 to 0.021	0.0353691	-0.047 to 0.118	0.403161	0.473302	0.0346736	-0.046 to 0.12
PI(36:2)		-0.00520937	-0.051 to 0.041	0.823493	0.997793	-0.00374017	-0.058 to 0.04	0.16906	0.089 to 0.249	3.93896e-05	0.000161438	0.16766	0.085 to 0.25
PI(37:6)		-0.0332258	-0.08 to 0.013	0.163543	0.997793	-0.0320354	-0.085 to 0.007	-0.215431	-0.297 to -0.134	2.75864e-07	2.466e-06	-0.213358	-0.308 to -0.132
PI(38:5) (a)		-0.0191295	-0.066 to 0.028	0.421899	0.997793	-0.0183783	-0.072 to 0.026	-0.0776548	-0.16 to 0.005	0.0666098	0.101351	-0.0767531	-0.169 to 0.005
PI(38:6)		0.000807706	-0.046 to 0.048	0.973172	0.997793	0.000445085	-0.041 to 0.046	0.0354619	-0.048 to 0.119	0.407066	0.477165	0.0368272	-0.044 to 0.121
PI(39:6)		-0.0074727	-0.053 to 0.038	0.747638	0.997793	-0.00639679	-0.051 to 0.035	-0.0637607	-0.145 to 0.017	0.122924	0.171255	-0.061857	-0.143 to 0.004
PIP1(38:4)		0.00451912	-0.038 to 0.047	0.834011	0.997793	0.00648117	-0.035 to 0.046	-0.0255901	-0.101 to 0.05	0.507646	0.579313	-0.0219642	-0.103 to 0.048
LPI(18:0) [sn1]		0.00751565	-0.037 to 0.052	0.742688	0.997793	0.00726224	-0.032 to 0.052	0.044354	-0.035 to 0.124	0.276317	0.343076	0.0456094	-0.03 to 0.128
LPI(18:0) [sn2]		0.0144185	-0.032 to 0.061	0.546192	0.997793	0.0137048	-0.035 to 0.059	-0.0438092	-0.127 to 0.04	0.304855	0.371378	-0.0440863	-0.132 to 0.037
LPI(18:1) [sn1]		-0.016313	-0.061 to 0.028	0.47445	0.997793	-0.0156521	-0.06 to 0.033	-0.00579283	-0.085 to 0.073	0.88608	0.904734	-0.00454949	-0.085 to 0.073
LPI(18:1) [sn2]		-0.0136306	-0.06 to 0.033	0.56458	0.997793	-0.0147098	-0.065 to 0.036	-0.032475	-0.115 to 0.05	0.441691	0.508535	-0.0317752	-0.12 to 0.056
LPI(18:2) [sn1]		0.0059098	-0.039 to 0.051	0.798393	0.997793	0.00535747	-0.042 to 0.051	0.120371	0.04 to 0.201	0.00337687	0.0076398	0.12117	0.041 to 0.196
LPI(18:2) [sn2]		0.0124685	-0.033 to 0.058	0.594889	0.997793	0.012028	-0.031 to 0.059	0.155418	0.075 to 0.236	0.000183634	0.000584016	0.156651	0.071 to 0.24
LPI(20:4) [sn1]		0.0075195	-0.039 to 0.054	0.750941	0.997793	0.00676406	-0.038 to 0.049	-0.0773988	-0.159 to 0.005	0.0648347	0.0992341	-0.0799655	-0.155 to 0.012
LPI(20:4) [sn2]		-0.0103217	-0.057 to 0.036	0.663848	0.997793	-0.0110842	-0.059 to 0.038	-0.0821461	-0.164 to 0	0.0504077	0.0796667	-0.0812863	-0.167 to 0.003
PS(36:1)		0.030703	-0.003 to 0.064	0.0716258	0.997793	0.030845	-0.002 to 0.062	0.171224	0.114 to 0.229	1.02794e-08	1.81292e-07	0.173772	0.107 to 0.233
PS(36:2)		0.0242723	-0.008 to 0.056	0.137376	0.997793	0.0239458	-0.008 to 0.055	0.154118	0.098 to 0.21	9.04742e-08	1.03247e-06	0.154309	0.102 to 0.21
PS(38:3)		0.0116737	-0.022 to 0.045	0.494613	0.997793	0.0129321	-0.017 to 0.039	0.0921076	0.033 to 0.151	0.00239032	0.005576	0.0936088	0.036 to 0.152
PS(38:4)		0.0171772	-0.015 to 0.049	0.295335	0.997793	0.0165868	-0.013 to 0.045	0.0712215	0.014 to 0.128	0.0146554	0.02747	0.0708165	0.015 to 0.129
PS(38:5)		0.00744326	-0.026 to 0.04	0.658726	0.997793	0.00755785	-0.024 to 0.042	0.014108	-0.045 to 0.073	0.640441	0.694109	0.0164549	-0.05 to 0.072
PS(40:5)		0.00442333	-0.033 to 0.042	0.815318	0.997793	0.00445371	-0.031 to 0.035	0.0290947	-0.037 to 0.095	0.38831	0.460044	0.0294599	-0.047 to 0.101
PS(40:6)		0.0160261	-0.025 to 0.057	0.443139	0.997793	0.0144571	-0.022 to 0.053	0.0216301	-0.051 to 0.095	0.561256	0.625769	0.0213124	-0.054 to 0.09
PG(34:1)		-0.0150975	-0.061 to 0.031	0.520451	0.997793	-0.0146043	-0.057 to 0.031	0.104119	0.023 to 0.185	0.0122702	0.023627	0.103064	0.022 to 0.202
PG(36:1)		-0.0131384	-0.059 to 0.032	0.571478	0.997793	-0.013005	-0.06 to 0.042	0.0932006	0.013 to 0.173	0.0230813	0.0408928	0.0922017	0.006 to 0.182
PG(36:2)		0.014934	-0.031 to 0.061	0.525048	0.997793	0.0138102	-0.026 to 0.059	0.189551	0.109 to 0.27	4.64813e-06	2.65217e-05	0.187649	0.097 to 0.279
CE(14:0)		-0.00661234	-0.054 to 0.041	0.78452	0.997793	-0.00679629	-0.055 to 0.036	-0.212645	-0.296 to -0.13	6.72653e-07	5.32631e-06	-0.213061	-0.301 to -0.136
CE(15:0)		0.000182535	-0.046 to 0.046	0.993827	0.997793	-0.000255416	-0.045 to 0.04	-0.275426	-0.355 to -0.196	2.51622e-11	1.62716e-09	-0.276316	-0.351 to -0.191
CE(16:0)		-0.0212469	-0.068 to 0.026	0.373594	0.997793	-0.0218214	-0.068 to 0.024	-0.157916	-0.239 to -0.076	0.000161722	0.00052073	-0.15873	-0.232 to -0.066
CE(16:1)		-0.0124216	-0.059 to 0.034	0.600753	0.997793	-0.0125368	-0.056 to 0.029	-0.227703	-0.308 to -0.147	4.52708e-08	6.27324e-07	-0.227355	-0.305 to -0.148
CE(16:2)		-0.00253372	-0.049 to 0.044	0.914913	0.997793	-0.00306635	-0.045 to 0.044	-0.315641	-0.394 to -0.237	2.00968e-14	7.79755e-12	-0.314075	-0.392 to -0.232
CE(17:0)		-0.0244557	-0.07 to 0.021	0.296054	0.997793	-0.0250944	-0.067 to 0.022	-0.221859	-0.301 to -0.143	6.15221e-08	7.82642e-07	-0.224809	-0.291 to -0.145
CE(17:1)		-0.0125262	-0.059 to 0.034	0.595317	0.997793	-0.0128983	-0.056 to 0.032	-0.278277	-0.357 to -0.199	1.29232e-11	1.22782e-09	-0.277969	-0.352 to -0.203
CE(18:0)		-0.0374642	-0.084 to 0.009	0.114083	0.997793	-0.037887	-0.079 to 0.01	-0.237856	-0.318 to -0.158	9.67286e-09	1.77755e-07	-0.240335	-0.312 to -0.16
CE(18:1)		-0.0381211	-0.086 to 0.009	0.116952	0.997793	-0.0378351	-0.079 to 0.005	-0.153548	-0.237 to -0.07	0.000338515	0.000976534	-0.15248	-0.246 to -0.074
CE(18:2)		-0.000830825	-0.048 to 0.046	0.97243	0.997793	-0.000610087	-0.047 to 0.046	-0.101746	-0.185 to -0.018	0.0171568	0.0313263	-0.103797	-0.199 to -0.018
CE(18:3)		0.0136175	-0.032 to 0.06	0.562437	0.997793	0.0125732	-0.033 to 0.058	-0.104713	-0.187 to -0.023	0.0126521	0.0241824	-0.104921	-0.183 to -0.025
CE(20:0)		-0.0416202	-0.089 to 0.006	0.0845432	0.997793	-0.0423428	-0.086 to 0.005	-0.158976	-0.242 to -0.076	0.000198113	0.00062241	-0.1591	-0.243 to -0.081
CE(20:1)		-0.0258498	-0.073 to 0.022	0.285505	0.997793	-0.0262293	-0.072 to 0.021	-0.167053	-0.251 to -0.084	9.94048e-05	0.000350628	-0.167261	-0.249 to -0.09
CE(20:2)		-0.00580224	-0.053 to 0.042	0.811113	0.997793	-0.00535156	-0.056 to 0.037	-0.104139	-0.188 to -0.02	0.0154229	0.0286321	-0.10366	-0.186 to -0.011
CE(20:3)		-0.0148769	-0.062 to 0.032	0.53318	0.997793	-0.0153824	-0.058 to 0.027	-0.0739442	-0.157 to 0.01	0.0830567	0.1223	-0.0727297	-0.159 to 0.001
CE(20:4)		-0.0126772	-0.059 to 0.033	0.588879	0.997793	-0.0120266	-0.058 to 0.027	-0.230465	-0.31 to -0.151	2.50012e-08	3.73095e-07	-0.232231	-0.304 to -0.148
CE(20:5)		-0.00178209	-0.047 to 0.044	0.939125	0.997793	-0.0032048	-0.042 to 0.044	-0.173603	-0.254 to -0.093	2.78033e-05	0.000119201	-0.177171	-0.257 to -0.088
CE(22:0)		-0.0426826	-0.09 to 0.005	0.0768601	0.997793	-0.0432468	-0.088 to 0.004	-0.0418031	-0.126 to 0.043	0.333339	0.402914	-0.0422524	-0.125 to 0.042
CE(22:1)		-0.022058	-0.069 to 0.025	0.356176	0.997793	-0.0215345	-0.065 to 0.021	-0.154645	-0.237 to -0.072	0.000267565	0.000798579	-0.154465	-0.234 to -0.084
CE(22:4)		0.00133609	-0.045 to 0.048	0.955155	0.997793	0.000171536	-0.043 to 0.046	-0.138892	-0.221 to -0.056	0.00101701	0.00261325	-0.138618	-0.21 to -0.063
CE(22:5) (n3)		0.0216118	-0.024 to 0.068	0.356545	0.997793	0.0205716	-0.016 to 0.064	-0.215186	-0.295 to -0.135	1.78533e-07	1.75369e-06	-0.215051	-0.295 to -0.14
CE(22:5) (n6)		-0.00252851	-0.049 to 0.044	0.915269	0.997793	-0.00179733	-0.048 to 0.04	-0.210654	-0.291 to -0.13	4.40441e-07	3.63598e-06	-0.213627	-0.293 to -0.13
CE(22:6)		0.0152558	-0.03 to 0.061	0.512025	0.997793	0.0137095	-0.021 to 0.059	-0.196419	-0.276 to -0.117	1.75168e-06	1.182e-05	-0.197328	-0.274 to -0.12
CE(24:0)		-0.0579263	-0.105 to -0.011	0.0161591	0.997793	-0.0579157	-0.102 to -0.015	-0.0691263	-0.154 to 0.015	0.109413	0.155788	-0.0690753	-0.154 to 0.017
CE(24:1)		-0.0354364	-0.082 to 0.012	0.140154	0.997793	-0.0354296	-0.081 to 0.004	-0.109152	-0.193 to -0.026	0.0107546	0.021128	-0.108958	-0.195 to -0.023
CE(24:4)		-0.0191052	-0.066 to 0.028	0.426247	0.997793	-0.0187225	-0.064 to 0.028	-0.237684	-0.319 to -0.156	1.99312e-08	3.22221e-07	-0.236364	-0.318 to -0.158
CE(24:5)		-0.0269247	-0.074 to 0.02	0.261772	0.997793	-0.0274528	-0.068 to 0.016	-0.325458	-0.405 to -0.246	5.43771e-15	4.21966e-12	-0.326057	-0.397 to -0.249
CE(24:6)		-0.00441976	-0.051 to 0.042	0.852463	0.997793	-0.00487276	-0.052 to 0.038	-0.181245	-0.263 to -0.1	1.50302e-05	7.19965e-05	-0.182199	-0.261 to -0.1
COH		-0.00613038	-0.053 to 0.041	0.798256	0.997793	-0.00575501	-0.053 to 0.035	-0.0570452	-0.14 to 0.026	0.177411	0.235738	-0.0597202	-0.137 to 0.025
DE(16:0)		-0.0235153	-0.071 to 0.023	0.327217	0.997793	-0.0235529	-0.065 to 0.017	-0.150235	-0.233 to -0.067	0.000431895	0.00123672	-0.149932	-0.228 to -0.061
DE(18:1)		-0.0299377	-0.077 to 0.018	0.217605	0.997793	-0.0300916	-0.073 to 0.025	-0.286631	-0.368 to -0.205	1.58677e-11	1.22782e-09	-0.285969	-0.374 to -0.21
DE(18:2)		-0.0139174	-0.06 to 0.032	0.553497	0.997793	-0.0134903	-0.051 to 0.031	-0.2656	-0.345 to -0.186	1.13032e-10	5.84751e-09	-0.265285	-0.344 to -0.186
DE(20:4)		-0.0097891	-0.055 to 0.035	0.671415	0.997793	-0.0105109	-0.049 to 0.03	-0.271677	-0.349 to -0.194	1.74047e-11	1.22782e-09	-0.273201	-0.351 to -0.188
DE(20:5)		-0.000976254	-0.047 to 0.045	0.966679	0.997793	-0.00262221	-0.039 to 0.043	-0.185181	-0.265 to -0.105	7.11086e-06	3.80554e-05	-0.187971	-0.258 to -0.102
DE(22:6)		0.00263897	-0.043 to 0.048	0.909983	0.997793	0.00303888	-0.042 to 0.04	-0.270513	-0.349 to -0.192	3.34568e-11	1.99711e-09	-0.26953	-0.345 to -0.197
FA(14:0)		-0.0233805	-0.066 to 0.02	0.286998	0.997793	-0.0238235	-0.069 to 0.029	-0.0574587	-0.134 to 0.019	0.142346	0.193113	-0.0555599	-0.13 to 0.024
FA(15:0)		-0.0116223	-0.057 to 0.034	0.615511	0.997793	-0.0119608	-0.067 to 0.043	-0.0336311	-0.115 to 0.047	0.416209	0.486413	-0.0325021	-0.116 to 0.048
FA(16:0)		-0.0180015	-0.058 to 0.022	0.381912	0.997793	-0.0198661	-0.056 to 0.028	-0.0691794	-0.141 to 0.003	0.059554	0.0920596	-0.0687613	-0.135 to 0.007
FA(16:1)		-0.0244918	-0.069 to 0.02	0.276598	0.997793	-0.0254082	-0.067 to 0.019	-0.0869492	-0.166 to -0.008	0.0305212	0.0514879	-0.0883864	-0.165 to -0.013
FA(16:2)		-0.0459151	-0.092 to 0	0.0494945	0.997793	-0.0458276	-0.09 to 0.008	0.00493317	-0.077 to 0.087	0.906334	0.921776	0.00402302	-0.074 to 0.099
FA(17:0)		-0.0204894	-0.066 to 0.025	0.382775	0.997793	-0.0206749	-0.072 to 0.037	-0.0764236	-0.158 to 0.006	0.0684975	0.103413	-0.0790313	-0.147 to 0.008
FA(17:1)		-0.0276667	-0.073 to 0.017	0.229679	0.997793	-0.0280341	-0.078 to 0.026	-0.0981156	-0.178 to -0.018	0.0170454	0.0311963	-0.0994235	-0.178 to -0.019
FA(18:0)		-0.010868	-0.057 to 0.035	0.644854	0.997793	-0.0130003	-0.065 to 0.051	-0.118825	-0.201 to -0.037	0.00474302	0.0103098	-0.122553	-0.189 to -0.04
FA(18:1)		-0.00997477	-0.051 to 0.031	0.636015	0.997793	-0.00965091	-0.054 to 0.031	-0.0412414	-0.115 to 0.032	0.271284	0.338451	-0.0400991	-0.113 to 0.032
FA(18:2)		-0.0094219	-0.047 to 0.028	0.624892	0.997793	-0.00874667	-0.049 to 0.027	0.0313009	-0.036 to 0.098	0.361498	0.432238	0.0312854	-0.029 to 0.1
FA(18:3)		-0.0151404	-0.054 to 0.024	0.446132	0.997793	-0.0151259	-0.053 to 0.024	0.0209046	-0.048 to 0.09	0.550595	0.617222	0.0199847	-0.037 to 0.089
FA(20:2)		-0.033725	-0.078 to 0.01	0.132564	0.997793	-0.035546	-0.082 to 0.017	-0.0359383	-0.115 to 0.043	0.37136	0.442171	-0.036195	-0.107 to 0.048
FA(20:3)		-0.0330762	-0.078 to 0.012	0.153548	0.997793	-0.0331085	-0.08 to 0.016	-0.0948411	-0.176 to -0.014	0.0218008	0.0389802	-0.0968608	-0.175 to -0.013
FA(20:4)		-0.0194903	-0.065 to 0.026	0.402338	0.997793	-0.0204737	-0.065 to 0.03	-0.0952814	-0.176 to -0.014	0.0213075	0.0381861	-0.0947787	-0.18 to -0.012
FA(20:5)		-0.0214555	-0.068 to 0.025	0.365131	0.997793	-0.0223251	-0.068 to 0.032	-0.0963376	-0.179 to -0.014	0.022879	0.0406272	-0.0961165	-0.173 to -0.022
FA(22:4)		-0.0179119	-0.063 to 0.027	0.436617	0.997793	-0.0188824	-0.067 to 0.033	-0.0810945	-0.162 to -0.001	0.0486987	0.0774389	-0.0810947	-0.173 to -0.003
FA(22:5)		-0.0222426	-0.067 to 0.023	0.331186	0.997793	-0.0242736	-0.065 to 0.029	-0.0975488	-0.177 to -0.018	0.0168782	0.0309632	-0.0974296	-0.173 to -0.012
FA(22:6)		-0.017233	-0.061 to 0.027	0.443572	0.997793	-0.0167793	-0.064 to 0.025	-0.108996	-0.187 to -0.031	0.00650513	0.0136064	-0.108748	-0.177 to -0.031
AC(12:0)		0.00391784	-0.042 to 0.05	0.868598	0.997793	0.00362407	-0.052 to 0.049	-0.109182	-0.191 to -0.027	0.00909395	0.0181879	-0.108545	-0.192 to -0.029
AC(13:0)		0.0145147	-0.032 to 0.061	0.539634	0.997793	0.0150721	-0.034 to 0.063	-0.100492	-0.183 to -0.018	0.0168503	0.0309632	-0.100391	-0.182 to -0.015
AC(14:0)		-0.0071817	-0.05 to 0.035	0.73986	0.997793	-0.00817918	-0.051 to 0.041	-0.177671	-0.251 to -0.104	2.6372e-06	1.66379e-05	-0.177597	-0.256 to -0.101
AC(14:1)		0.00151228	-0.045 to 0.048	0.948857	0.997793	0.00166292	-0.055 to 0.05	-0.0816261	-0.163 to 0	0.0505122	0.0796696	-0.0822448	-0.165 to -0.002
AC(14:2)		-0.000925712	-0.048 to 0.046	0.969042	0.997793	-0.00101962	-0.056 to 0.048	-0.0244471	-0.107 to 0.059	0.563998	0.627024	-0.025277	-0.102 to 0.065
AC(15:0) (a)		-0.0137934	-0.059 to 0.032	0.554265	0.997793	-0.0143039	-0.062 to 0.036	-0.198043	-0.277 to -0.119	1.35068e-06	9.44256e-06	-0.196036	-0.281 to -0.126
AC(15:0) (b)		-0.0121384	-0.055 to 0.031	0.583155	0.997793	-0.0128259	-0.059 to 0.038	-0.160343	-0.236 to -0.085	3.84991e-05	0.000159761	-0.159563	-0.24 to -0.086
AC(16:0)		-0.00607441	-0.044 to 0.032	0.753315	0.997793	-0.00712927	-0.047 to 0.04	-0.143131	-0.209 to -0.078	2.17623e-05	9.76159e-05	-0.142334	-0.209 to -0.073
AC(16:1)		-0.00750054	-0.05 to 0.035	0.727864	0.997793	-0.00592993	-0.054 to 0.038	-0.132211	-0.206 to -0.058	0.000501717	0.00140553	-0.132876	-0.213 to -0.056
AC(17:0) (a)		-0.0134508	-0.058 to 0.031	0.553655	0.997793	-0.013369	-0.062 to 0.033	-0.188709	-0.266 to -0.111	2.50039e-06	1.60355e-05	-0.189489	-0.263 to -0.114
AC(17:0) (b)		-0.00959645	-0.053 to 0.034	0.666199	0.997793	-0.00922345	-0.058 to 0.033	-0.179205	-0.255 to -0.103	4.82719e-06	2.71442e-05	-0.178893	-0.248 to -0.107
AC(18:0)		-0.0196871	-0.061 to 0.022	0.35572	0.997793	-0.018977	-0.063 to 0.023	-0.176029	-0.248 to -0.104	2.38365e-06	1.55438e-05	-0.175223	-0.255 to -0.113
AC(18:1)		0.014433	-0.014 to 0.043	0.316363	0.997793	0.014311	-0.014 to 0.042	-0.0571087	-0.106 to -0.008	0.0235869	0.0415987	-0.0574915	-0.1 to 0.003
AC(18:2)		0.0104139	-0.016 to 0.037	0.435625	0.997793	0.0103899	-0.014 to 0.034	-0.0113283	-0.058 to 0.035	0.631823	0.689081	-0.011281	-0.057 to 0.046
DG(14:0_16:0)		-0.0244462	-0.071 to 0.022	0.306383	0.997793	-0.0254473	-0.073 to 0.024	-0.0126919	-0.096 to 0.071	0.765943	0.804292	-0.0128196	-0.097 to 0.081
DG(14:0_18:2)		-0.0304643	-0.077 to 0.016	0.201434	0.997793	-0.0306205	-0.076 to 0.017	0.153757	0.072 to 0.236	0.000254497	0.000770103	0.154732	0.071 to 0.244
DG(16:0_16:0)		-0.0178781	-0.065 to 0.029	0.454345	0.997793	-0.0175582	-0.066 to 0.024	0.0593523	-0.024 to 0.143	0.162806	0.2182	0.0591794	-0.032 to 0.155
DG(16:0_16:1)		-0.0330151	-0.08 to 0.014	0.170087	0.997793	-0.0335164	-0.08 to 0.01	-0.0426566	-0.127 to 0.041	0.320709	0.389468	-0.0429987	-0.126 to 0.043
DG(16:0_18:1)		-0.0108498	-0.057 to 0.036	0.648372	0.997793	-0.0111257	-0.056 to 0.036	0.15307	0.071 to 0.235	0.000270709	0.000804868	0.153596	0.071 to 0.238
DG(16:0_18:2)		-0.00605162	-0.053 to 0.041	0.799756	0.997793	-0.00566618	-0.052 to 0.04	0.256892	0.177 to 0.337	5.74793e-10	1.78416e-08	0.258264	0.167 to 0.34
DG(16:0_20:4)		-0.00915469	-0.054 to 0.036	0.690653	0.997793	-0.00953661	-0.053 to 0.038	0.0321197	-0.048 to 0.112	0.431071	0.500463	0.0355307	-0.062 to 0.108
DG(16:0_22:5)		-0.000499759	-0.046 to 0.045	0.982892	0.997793	0.000479779	-0.049 to 0.043	0.0475606	-0.033 to 0.128	0.249892	0.316856	0.0468626	-0.044 to 0.132
DG(16:0_22:6)		0.00489563	-0.041 to 0.05	0.833344	0.997793	0.00436161	-0.038 to 0.05	0.0934707	0.013 to 0.174	0.0234995	0.0415391	0.0921006	0.015 to 0.171
DG(16:1_18:1)		-0.0250968	-0.072 to 0.022	0.295689	0.997793	-0.0257658	-0.068 to 0.023	0.0550792	-0.029 to 0.139	0.197541	0.257916	0.0563098	-0.032 to 0.136
DG(18:0_18:1)		-0.0189004	-0.066 to 0.028	0.432785	0.997793	-0.0183787	-0.079 to 0.03	0.13547	0.052 to 0.219	0.00152784	0.00376382	0.134699	0.042 to 0.227
DG(18:0_18:2)		-0.0213406	-0.068 to 0.026	0.373975	0.997793	-0.0197058	-0.07 to 0.023	0.185961	0.104 to 0.268	1.10268e-05	5.39427e-05	0.185929	0.084 to 0.27
DG(18:0_20:4)		0.0175617	-0.022 to 0.057	0.380172	0.997793	0.0175391	-0.021 to 0.054	0.167224	0.1 to 0.235	1.60747e-06	1.09421e-05	0.168028	0.092 to 0.245
DG(18:0_22:6)		-0.00310248	-0.05 to 0.044	0.896558	0.997793	-0.003597	-0.056 to 0.051	-0.00120986	-0.085 to 0.083	0.97745	0.982514	-0.00308258	-0.077 to 0.085
DG(18:1_18:1)		-0.013061	-0.06 to 0.034	0.588962	0.997793	-0.0142262	-0.066 to 0.038	0.230313	0.148 to 0.312	5.52572e-08	7.16667e-07	0.229921	0.145 to 0.315
DG(18:1_18:2)		-0.0107289	-0.058 to 0.036	0.653186	0.997793	-0.0113622	-0.055 to 0.037	0.279676	0.2 to 0.359	1.61989e-11	1.22782e-09	0.278548	0.194 to 0.353
DG(18:1_18:3)		-0.0223892	-0.069 to 0.024	0.344882	0.997793	-0.0209472	-0.064 to 0.023	0.249339	0.17 to 0.329	1.68249e-09	3.95639e-08	0.250508	0.172 to 0.327
DG(18:1_20:3)		-0.000816105	-0.047 to 0.046	0.972622	0.997793	-0.000138819	-0.049 to 0.044	0.158825	0.077 to 0.241	0.000157158	0.00051027	0.160221	0.076 to 0.235
DG(18:1_20:4)		0.0169308	-0.029 to 0.063	0.47325	0.997793	0.0167521	-0.027 to 0.07	0.26016	0.181 to 0.34	2.89833e-10	9.77873e-09	0.258332	0.192 to 0.35
DG(18:1_20:5)		-0.00180535	-0.048 to 0.044	0.939027	0.997793	-0.00215771	-0.044 to 0.044	0.101847	0.02 to 0.184	0.0148163	0.0276381	0.102601	0.015 to 0.176
DG(18:1_22:5)		0.00394152	-0.042 to 0.05	0.867648	0.997793	0.00569402	-0.044 to 0.046	0.158682	0.078 to 0.24	0.000142234	0.000473706	0.159707	0.072 to 0.249
DG(18:1_22:6)		0.0126672	-0.034 to 0.059	0.591241	0.997793	0.0131135	-0.035 to 0.057	0.157756	0.076 to 0.239	0.000160924	0.000520321	0.159387	0.08 to 0.231
DG(18:2_18:2)		-0.0125123	-0.059 to 0.034	0.598938	0.997793	-0.0124679	-0.057 to 0.031	0.207918	0.127 to 0.289	7.07935e-07	5.54906e-06	0.208377	0.125 to 0.294
DG(18:2_20:4)		0.017553	-0.028 to 0.064	0.454391	0.997793	0.0178599	-0.022 to 0.063	0.297428	0.22 to 0.375	2.8188e-13	4.37478e-11	0.296605	0.22 to 0.382
DG(18:2_22:6)		0.0109348	-0.036 to 0.057	0.644737	0.997793	0.0105769	-0.034 to 0.054	0.186511	0.105 to 0.268	8.44233e-06	4.4071e-05	0.187298	0.107 to 0.253
TG(48:0) [SIM]		-0.0123211	-0.059 to 0.034	0.602213	0.997793	-0.012728	-0.061 to 0.039	-0.0687737	-0.151 to 0.014	0.10199	0.146301	-0.0674788	-0.155 to 0.019
TG(48:1) [SIM]		-0.00666898	-0.052 to 0.039	0.775178	0.997793	-0.00623706	-0.056 to 0.039	-0.0375712	-0.119 to 0.044	0.367023	0.438169	-0.0350116	-0.133 to 0.042
TG(48:2) [SIM]		-0.000203211	-0.046 to 0.046	0.993085	0.997793	-0.00147737	-0.044 to 0.048	0.114529	0.033 to 0.196	0.00587742	0.0124274	0.116125	0.019 to 0.193
TG(48:3) [SIM]		-0.00461157	-0.05 to 0.041	0.843322	0.997793	-0.00477657	-0.047 to 0.042	0.188798	0.109 to 0.269	4.35796e-06	2.54269e-05	0.189621	0.099 to 0.272
TG(49:1) [SIM]		0.00550866	-0.04 to 0.051	0.814431	0.997793	0.00652727	-0.045 to 0.057	-0.136966	-0.218 to -0.056	0.00102832	0.00262652	-0.134639	-0.215 to -0.05
TG(50:0) [SIM]		-0.00854902	-0.054 to 0.037	0.714112	0.997793	-0.00946812	-0.056 to 0.039	-0.0176654	-0.099 to 0.064	0.670455	0.7206	-0.0173253	-0.102 to 0.061
TG(50:1) [SIM]		0.00104933	-0.045 to 0.047	0.964204	0.997793	0.000549348	-0.047 to 0.05	-0.0162335	-0.097 to 0.065	0.694513	0.741324	-0.0168865	-0.103 to 0.078
TG(50:2) [SIM]		-0.0140031	-0.06 to 0.032	0.550577	0.997793	-0.0136313	-0.06 to 0.04	0.0150239	-0.067 to 0.097	0.718724	0.764014	0.0175076	-0.071 to 0.095
TG(50:3) [SIM]		-0.00261055	-0.049 to 0.043	0.91153	0.997793	-0.0018507	-0.047 to 0.049	0.124585	0.044 to 0.206	0.0026896	0.00623023	0.127652	0.032 to 0.209
TG(50:4) [SIM]		-0.0106256	-0.056 to 0.035	0.649909	0.997793	-0.00973111	-0.055 to 0.039	0.206747	0.127 to 0.286	4.7442e-07	3.87526e-06	0.207603	0.118 to 0.292
TG(51:0) [SIM]		-0.0107793	-0.058 to 0.037	0.655174	0.997793	-0.0128549	-0.059 to 0.041	-0.0451984	-0.13 to 0.039	0.29381	0.362475	-0.0464778	-0.123 to 0.055
TG(51:1) [SIM]		-0.00436508	-0.05 to 0.041	0.85115	0.997793	-0.00485574	-0.053 to 0.045	-0.0552776	-0.136 to 0.026	0.181709	0.240506	-0.0553958	-0.129 to 0.031
TG(51:2) [SIM]		0.000602873	-0.045 to 0.046	0.979293	0.997793	0.000884394	-0.047 to 0.048	-0.0412426	-0.122 to 0.04	0.318418	0.387292	-0.0412658	-0.122 to 0.038
TG(52:1) [SIM]		-0.00842361	-0.054 to 0.037	0.715658	0.997793	-0.00959008	-0.056 to 0.038	0.0132898	-0.067 to 0.094	0.746191	0.788889	0.0120622	-0.068 to 0.099
TG(52:2) [SIM]		0.00647593	-0.04 to 0.053	0.783979	0.997793	0.00615598	-0.036 to 0.048	0.129224	0.047 to 0.211	0.00205585	0.00490873	0.126527	0.042 to 0.225
TG(52:3) [SIM]		0.0156022	-0.031 to 0.062	0.511067	0.997793	0.0148988	-0.025 to 0.065	0.225852	0.145 to 0.307	6.37221e-08	7.97554e-07	0.225808	0.148 to 0.31
TG(52:4) [SIM]		0.0239671	-0.022 to 0.07	0.311756	0.997793	0.0246569	-0.017 to 0.067	0.253926	0.175 to 0.333	7.50275e-10	2.15634e-08	0.252483	0.169 to 0.336
TG(52:5) [SIM]		-0.00301263	-0.049 to 0.043	0.897825	0.997793	-0.00334205	-0.046 to 0.042	0.260923	0.183 to 0.339	1.56619e-10	6.75202e-09	0.262545	0.167 to 0.345
TG(53:2) [SIM]		-0.00289334	-0.048 to 0.043	0.901057	0.997793	-0.00314205	-0.055 to 0.041	0.0247098	-0.057 to 0.106	0.551205	0.617222	0.0251155	-0.058 to 0.106
TG(54:0) [SIM]		-0.0110712	-0.057 to 0.035	0.637308	0.997793	-0.0107882	-0.054 to 0.035	0.0155207	-0.067 to 0.098	0.711503	0.758415	0.0156591	-0.065 to 0.098
TG(54:1) [SIM]		-0.0170509	-0.063 to 0.029	0.464127	0.997793	-0.0165495	-0.064 to 0.03	0.0535307	-0.028 to 0.135	0.197757	0.257916	0.0506758	-0.024 to 0.148
TG(54:2) [SIM]		-0.00533298	-0.051 to 0.041	0.820115	0.997793	-0.00548113	-0.045 to 0.038	0.173586	0.094 to 0.254	2.52613e-05	0.00011075	0.174851	0.088 to 0.258
TG(54:3) [SIM]		-0.00336584	-0.049 to 0.043	0.886058	0.997793	-0.00297356	-0.05 to 0.036	0.195548	0.116 to 0.275	2.04514e-06	1.35643e-05	0.196316	0.12 to 0.275
TG(54:4) [SIM]		-0.00556841	-0.051 to 0.04	0.811439	0.997793	-0.00612511	-0.044 to 0.041	0.213618	0.135 to 0.293	1.73145e-07	1.72257e-06	0.215355	0.131 to 0.29
TG(54:5) [SIM]		-0.00488138	-0.051 to 0.041	0.834874	0.997793	-0.00469467	-0.048 to 0.04	0.231397	0.152 to 0.311	1.64311e-08	2.71288e-07	0.231162	0.16 to 0.309
TG(54:6) [SIM]		-0.00293953	-0.049 to 0.043	0.900866	0.997793	-0.00312105	-0.046 to 0.049	0.248158	0.169 to 0.328	1.91759e-09	4.37663e-08	0.250924	0.163 to 0.329
TG(54:7) [SIM]		-0.0118416	-0.058 to 0.034	0.613875	0.997793	-0.0113152	-0.058 to 0.033	0.247712	0.169 to 0.327	1.55923e-09	3.90311e-08	0.248584	0.164 to 0.325
TG(56:6) [SIM]		0.0350555	-0.011 to 0.081	0.136134	0.997793	0.0352072	-0.012 to 0.078	0.204431	0.124 to 0.285	8.21641e-07	6.25091e-06	0.203868	0.11 to 0.295
TG(56:7) [SIM]		0.0266905	-0.019 to 0.072	0.251307	0.997793	0.0248382	-0.017 to 0.078	0.152685	0.073 to 0.233	0.00020767	0.000644609	0.154143	0.064 to 0.234
TG(56:8) [SIM]		0.024476	-0.021 to 0.07	0.294102	0.997793	0.0243905	-0.021 to 0.067	0.221873	0.142 to 0.301	6.69106e-08	8.24168e-07	0.220525	0.148 to 0.312
TG(56:9) [SIM]		0.0106436	-0.036 to 0.057	0.655092	0.997793	0.00975058	-0.033 to 0.062	0.180448	0.098 to 0.262	1.9115e-05	8.82932e-05	0.177512	0.099 to 0.279
TG(58:10) [SIM]		0.024867	-0.021 to 0.071	0.289059	0.997793	0.0242235	-0.018 to 0.07	0.152652	0.071 to 0.234	0.000250009	0.000760813	0.153918	0.061 to 0.235
TG(58:8) [SIM]		0.0147881	-0.031 to 0.061	0.528378	0.997793	0.0149406	-0.03 to 0.055	0.124067	0.043 to 0.205	0.00286874	0.00658622	0.126375	0.038 to 0.198
TG(58:9) [SIM]		0.0170942	-0.029 to 0.063	0.470386	0.997793	0.0169991	-0.031 to 0.065	0.158963	0.077 to 0.241	0.00015414	0.000502573	0.162	0.075 to 0.233
TG(48:0) [NL-16:0]		-0.00896077	-0.055 to 0.037	0.703873	0.997793	-0.00877147	-0.054 to 0.034	-0.0226984	-0.105 to 0.059	0.588555	0.645995	-0.0250595	-0.104 to 0.07
TG(48:0) [NL-18:0]		-0.0028766	-0.049 to 0.043	0.902447	0.997793	-0.00200907	-0.051 to 0.045	-0.124776	-0.206 to -0.043	0.00279769	0.00646134	-0.125617	-0.201 to -0.035
TG(48:1) [NL-16:1]		-0.0121462	-0.058 to 0.034	0.604279	0.997793	-0.011212	-0.06 to 0.038	-0.138716	-0.22 to -0.058	0.00084665	0.00223469	-0.139199	-0.214 to -0.04
TG(48:1) [NL-18:1]		-0.000876576	-0.047 to 0.045	0.970115	0.997793	-0.000890317	-0.049 to 0.046	-0.0194228	-0.101 to 0.062	0.641405	0.694184	-0.0157203	-0.105 to 0.066
TG(48:2) [NL-14:0]		0.00310477	-0.043 to 0.049	0.894298	0.997793	0.00247331	-0.046 to 0.048	0.0589884	-0.022 to 0.14	0.154832	0.208236	0.0603079	-0.029 to 0.155
TG(48:2) [NL-14:1]		0.0107637	-0.035 to 0.057	0.645617	0.997793	0.00952446	-0.035 to 0.057	-0.049238	-0.131 to 0.032	0.237505	0.302138	-0.050473	-0.129 to 0.025
TG(48:2) [NL-16:1]		-0.0115642	-0.057 to 0.034	0.621798	0.997793	-0.0111666	-0.062 to 0.03	-0.139515	-0.221 to -0.058	0.000829611	0.0021972	-0.141258	-0.244 to -0.056
TG(48:2) [NL-18:2]		-0.00922059	-0.055 to 0.037	0.69284	0.997793	-0.0103587	-0.054 to 0.038	0.0769815	-0.004 to 0.158	0.0630652	0.0972935	0.0759028	-0.017 to 0.183
TG(48:3) [NL-14:0]		-0.00651936	-0.052 to 0.039	0.780879	0.997793	-0.00666045	-0.056 to 0.037	0.0883661	0.007 to 0.17	0.0334457	0.0555757	0.0881848	0.01 to 0.177
TG(48:3) [NL-16:1]		-0.00988	-0.056 to 0.036	0.673258	0.997793	-0.0104397	-0.053 to 0.037	-0.0120959	-0.094 to 0.07	0.77281	0.810406	-0.0120511	-0.11 to 0.071
TG(48:3) [NL-18:3]		-0.00965224	-0.056 to 0.036	0.68184	0.997793	-0.0105466	-0.06 to 0.044	0.0936234	0.012 to 0.175	0.0249329	0.0437735	0.0931604	0.006 to 0.184
TG(49:1) [NL-16:1]		0.00212366	-0.045 to 0.049	0.929571	0.997793	0.00368737	-0.042 to 0.051	-0.168654	-0.251 to -0.086	7.48982e-05	0.000271593	-0.169117	-0.248 to -0.086
TG(49:1) [NL-17:1]		-0.001146	-0.047 to 0.045	0.961015	0.997793	-0.00112637	-0.049 to 0.043	-0.139811	-0.221 to -0.059	0.000774252	0.00207896	-0.138979	-0.227 to -0.054
TG(50:0) [NL-18:0]		-0.00270226	-0.048 to 0.043	0.907822	0.997793	-0.00300897	-0.049 to 0.048	-0.00685685	-0.088 to 0.074	0.8688	0.889431	-0.00642134	-0.089 to 0.073
TG(50:1) [NL-14:0]		-0.0113995	-0.058 to 0.035	0.628269	0.997793	-0.0109894	-0.063 to 0.034	-0.0559254	-0.138 to 0.026	0.183624	0.242334	-0.0538447	-0.143 to 0.02
TG(50:1) [NL-16:0]		0.0183017	-0.028 to 0.064	0.435214	0.997793	0.0193091	-0.025 to 0.066	0.0198283	-0.061 to 0.101	0.632249	0.689081	0.0196862	-0.072 to 0.105
TG(50:1) [NL-18:1]		-0.00736948	-0.053 to 0.039	0.753537	0.997793	-0.00745223	-0.054 to 0.046	-0.0527441	-0.134 to 0.029	0.203942	0.265091	-0.0520834	-0.142 to 0.039
TG(50:2) [NL-14:0]		0.00807632	-0.038 to 0.054	0.730123	0.997793	0.00825243	-0.038 to 0.053	0.0731995	-0.008 to 0.154	0.0775673	0.114871	0.0738852	-0.018 to 0.151
TG(50:2) [NL-16:1]		-0.00192449	-0.048 to 0.044	0.934444	0.997793	-0.0011192	-0.051 to 0.049	-0.0843961	-0.165 to -0.003	0.0418045	0.0678667	-0.0847264	-0.164 to 0.003
TG(50:2) [NL-18:1]		-0.00124942	-0.047 to 0.045	0.95778	0.997793	-0.00116887	-0.048 to 0.046	-0.00248192	-0.085 to 0.08	0.952937	0.961611	-0.00304897	-0.086 to 0.087
TG(50:2) [NL-18:2]		0.00445047	-0.042 to 0.051	0.850568	0.997793	0.00421854	-0.041 to 0.054	0.0450806	-0.037 to 0.127	0.280178	0.347314	0.0458642	-0.04 to 0.134
TG(50:3) [NL-14:0]		0.00910214	-0.037 to 0.055	0.696101	0.997793	0.00957263	-0.035 to 0.05	0.190296	0.111 to 0.27	3.16635e-06	1.95007e-05	0.190173	0.108 to 0.27
TG(50:3) [NL-14:1]		0.0124477	-0.034 to 0.059	0.599215	0.997793	0.0131047	-0.04 to 0.052	-0.00986775	-0.092 to 0.073	0.814901	0.844276	-0.0110147	-0.097 to 0.08
TG(50:3) [NL-16:1]		-0.00383586	-0.05 to 0.042	0.870459	0.997793	-0.00388227	-0.05 to 0.046	-0.0192541	-0.101 to 0.063	0.645478	0.69665	-0.0190945	-0.107 to 0.063
TG(50:3) [NL-18:2]		0.00679653	-0.039 to 0.052	0.769937	0.997793	0.00772083	-0.037 to 0.055	0.165481	0.086 to 0.245	5.19542e-05	0.000198603	0.167046	0.08 to 0.256
TG(50:3) [NL-18:3]		-0.00808084	-0.054 to 0.038	0.732897	0.997793	-0.00790817	-0.056 to 0.036	0.0438065	-0.038 to 0.126	0.295689	0.364213	0.0431986	-0.049 to 0.143
TG(50:4) [NL-14:0]		-0.00416624	-0.05 to 0.042	0.858386	0.997793	-0.0033004	-0.05 to 0.041	0.219786	0.141 to 0.299	7.31068e-08	8.59558e-07	0.218943	0.129 to 0.3
TG(50:4) [NL-18:3]		-0.00887628	-0.055 to 0.037	0.706048	0.997793	-0.010504	-0.058 to 0.038	0.168581	0.088 to 0.249	4.79487e-05	0.000186041	0.168887	0.077 to 0.255
TG(50:4) [NL-20:4]		0.00792566	-0.038 to 0.053	0.733091	0.997793	0.00836292	-0.039 to 0.058	0.045139	-0.036 to 0.126	0.275475	0.342577	0.0466104	-0.042 to 0.133
TG(51:0) [NL-16:0]		-0.0052756	-0.051 to 0.041	0.821965	0.997793	-0.00529441	-0.052 to 0.039	-0.0512856	-0.133 to 0.031	0.220122	0.283745	-0.0503061	-0.132 to 0.03
TG(51:1) [NL-17:0]		-0.0110665	-0.057 to 0.035	0.634266	0.997793	-0.0111452	-0.061 to 0.037	-0.0430783	-0.124 to 0.038	0.298123	0.366443	-0.0423754	-0.129 to 0.038
TG(51:2) [NL-15:0]		-0.00206146	-0.048 to 0.044	0.930106	0.997793	-0.0027415	-0.047 to 0.044	0.00363857	-0.078 to 0.086	0.930718	0.940413	0.00379197	-0.086 to 0.086
TG(51:2) [NL-17:0]		0.00568427	-0.04 to 0.051	0.806958	0.997793	0.00579725	-0.04 to 0.051	-0.0321935	-0.113 to 0.049	0.436383	0.503169	-0.0329581	-0.109 to 0.05
TG(51:2) [NL-17:1]		0.00574523	-0.04 to 0.051	0.804923	0.997793	0.00583988	-0.04 to 0.055	-0.0322648	-0.113 to 0.049	0.435325	0.502697	-0.0306939	-0.116 to 0.049
TG(52:1) [NL-18:0]		-0.00699392	-0.052 to 0.038	0.761573	0.997793	-0.00726771	-0.052 to 0.036	0.00920961	-0.071 to 0.089	0.821978	0.848211	0.00839081	-0.079 to 0.086
TG(52:1) [NL-18:1]		-0.00816318	-0.054 to 0.037	0.724494	0.997793	-0.0091414	-0.056 to 0.037	-0.000150882	-0.081 to 0.08	0.997073	0.99836	0.00245224	-0.084 to 0.086
TG(52:2) [NL-16:0]		0.0325122	-0.014 to 0.079	0.169014	0.997793	0.0315861	-0.013 to 0.078	0.215344	0.135 to 0.296	2.46058e-07	2.28247e-06	0.215618	0.129 to 0.298
TG(52:2) [NL-18:2]		-0.0172804	-0.063 to 0.028	0.458384	0.997793	-0.0169641	-0.068 to 0.027	0.00381424	-0.077 to 0.085	0.926505	0.937377	0.00310279	-0.082 to 0.091
TG(52:3) [NL-16:1]		-0.00665531	-0.054 to 0.04	0.781891	0.997793	-0.00666287	-0.059 to 0.038	-0.0551719	-0.139 to 0.029	0.197757	0.257916	-0.0551496	-0.141 to 0.034
TG(52:3) [NL-18:2]		0.0165018	-0.03 to 0.063	0.485974	0.997793	0.0160742	-0.028 to 0.06	0.217003	0.137 to 0.297	1.63876e-07	1.69557e-06	0.216031	0.133 to 0.303
TG(52:4) [NL-16:1]		0.0208893	-0.025 to 0.067	0.376904	0.997793	0.0211384	-0.021 to 0.07	0.124852	0.043 to 0.206	0.00280988	0.00647023	0.123235	0.032 to 0.209
TG(52:4) [NL-18:2]		0.0130507	-0.033 to 0.059	0.577425	0.997793	0.0134971	-0.03 to 0.057	0.281777	0.204 to 0.36	4.728e-12	5.24132e-10	0.281675	0.199 to 0.362
TG(52:4) [NL-18:3]		0.00761175	-0.039 to 0.054	0.748344	0.997793	0.00780365	-0.039 to 0.053	0.213899	0.134 to 0.294	2.56543e-07	2.34209e-06	0.213865	0.117 to 0.31
TG(52:5) [NL-18:3]		0.00313043	-0.043 to 0.049	0.894528	0.997793	0.00294359	-0.04 to 0.052	0.250269	0.171 to 0.33	1.26632e-09	3.38851e-08	0.249982	0.162 to 0.338
TG(52:5) [NL-20:4]		0.00864615	-0.037 to 0.054	0.707797	0.997793	0.00666991	-0.037 to 0.057	0.0498953	-0.031 to 0.13	0.224372	0.288744	0.0482255	-0.035 to 0.139
TG(52:5) [NL-20:5]		0.00448171	-0.04 to 0.049	0.845136	0.997793	0.00440761	-0.043 to 0.05	-0.0429386	-0.123 to 0.037	0.292207	0.361647	-0.0411337	-0.14 to 0.036
TG(53:2) [NL-17:1]		-0.00444081	-0.05 to 0.041	0.848265	0.997793	-0.00431868	-0.05 to 0.041	-0.011343	-0.092 to 0.07	0.784143	0.816772	-0.0101891	-0.089 to 0.06
TG(53:2) [NL-18:1]		0.000305607	-0.045 to 0.046	0.989514	0.997793	0.0010399	-0.046 to 0.042	0.0337768	-0.047 to 0.115	0.413637	0.484137	0.0332725	-0.044 to 0.119
TG(54:0) [NL-18:0]		-0.00712629	-0.053 to 0.039	0.760656	0.997793	-0.00804581	-0.052 to 0.038	-0.0281591	-0.11 to 0.054	0.500289	0.571759	-0.0275527	-0.101 to 0.055
TG(54:1) [NL-18:1]		-0.023425	-0.069 to 0.022	0.315749	0.997793	-0.0235651	-0.069 to 0.025	0.0459846	-0.035 to 0.127	0.269157	0.336881	0.0456118	-0.043 to 0.119
TG(54:2) [NL-18:0]		-0.00617755	-0.052 to 0.04	0.793339	0.997793	-0.00511851	-0.055 to 0.039	0.166269	0.086 to 0.247	5.96154e-05	0.000223486	0.167495	0.083 to 0.252
TG(54:2) [NL-20:1]		-0.00123916	-0.047 to 0.045	0.957679	0.997793	-0.000924491	-0.048 to 0.046	0.164447	0.085 to 0.244	6.32561e-05	0.000233746	0.165942	0.074 to 0.257
TG(54:3) [NL-18:1]		0.00706995	-0.039 to 0.053	0.761632	0.997793	0.00769358	-0.036 to 0.049	0.181134	0.102 to 0.26	9.24803e-06	4.78431e-05	0.181699	0.102 to 0.259
TG(54:3) [NL-18:2]		0.0221681	-0.024 to 0.068	0.346164	0.997793	0.0223078	-0.024 to 0.069	0.270743	0.192 to 0.349	3.71261e-11	2.05784e-09	0.27274	0.185 to 0.339
TG(54:4) [NL-18:2]		-0.0210743	-0.067 to 0.025	0.366718	0.997793	-0.0208841	-0.064 to 0.024	0.19253	0.113 to 0.272	2.80713e-06	1.75672e-05	0.194918	0.094 to 0.271
TG(54:4) [NL-20:3]		0.00401644	-0.042 to 0.05	0.864006	0.997793	0.00515983	-0.044 to 0.051	0.115019	0.034 to 0.196	0.00542692	0.0116334	0.114018	0.031 to 0.205
TG(54:5) [NL-18:3]		0.00393781	-0.042 to 0.05	0.867642	0.997793	0.00468907	-0.044 to 0.043	0.231108	0.151 to 0.311	2.22356e-08	3.45097e-07	0.230214	0.145 to 0.326
TG(54:5) [NL-20:4]		0.0319745	-0.014 to 0.078	0.172361	0.997793	0.0322398	-0.016 to 0.074	0.176392	0.096 to 0.256	1.85108e-05	8.60142e-05	0.173963	0.092 to 0.261
TG(54:6) [NL-18:3]		-0.00994773	-0.056 to 0.036	0.669684	0.997793	-0.00967393	-0.052 to 0.03	0.234644	0.156 to 0.314	9.84983e-09	1.77755e-07	0.233542	0.149 to 0.324
TG(54:6) [NL-20:4]		0.0308555	-0.016 to 0.077	0.193618	0.997793	0.0324275	-0.017 to 0.086	0.251687	0.172 to 0.332	1.31548e-09	3.40271e-08	0.253025	0.16 to 0.345
TG(54:6) [NL-20:5]		0.0089575	-0.036 to 0.054	0.699114	0.997793	0.00894034	-0.04 to 0.058	-0.000817582	-0.082 to 0.08	0.98417	0.986713	-3.47287e-05	-0.075 to 0.085
TG(54:6) [NL-22:6]		0.0105034	-0.034 to 0.055	0.645634	0.997793	0.0113799	-0.035 to 0.058	0.0175729	-0.062 to 0.097	0.664602	0.7153	0.0171379	-0.058 to 0.096
TG(54:7) [NL-20:5]		0.0088965	-0.037 to 0.055	0.70293	0.997793	0.00879096	-0.04 to 0.059	0.146059	0.066 to 0.226	0.0003873	0.00111313	0.146537	0.071 to 0.231
TG(54:7) [NL-22:6]		0.00366252	-0.041 to 0.049	0.873328	0.997793	0.00390712	-0.043 to 0.046	0.102487	0.023 to 0.182	0.0120846	0.0233857	0.10192	0.023 to 0.177
TG(56:6) [NL-20:4]		0.0505693	0.004 to 0.097	0.0339077	0.997793	0.0503158	0.003 to 0.1	0.215807	0.134 to 0.297	2.96038e-07	2.58119e-06	0.21693	0.135 to 0.289
TG(56:6) [NL-22:5](a)		0.00847143	-0.037 to 0.054	0.714101	0.997793	0.00781244	-0.036 to 0.05	0.0726105	-0.008 to 0.153	0.076301	0.113211	0.0728677	-0.019 to 0.159
TG(56:6) [NL-22:5](b)		0.00959557	-0.036 to 0.055	0.678036	0.997793	0.00908381	-0.036 to 0.05	0.0730553	-0.007 to 0.153	0.0743784	0.110995	0.0727982	-0.01 to 0.153
TG(56:7) [NL-20:4]		0.0333042	-0.014 to 0.08	0.164403	0.997793	0.0320616	-0.01 to 0.08	0.222892	0.141 to 0.304	1.25799e-07	1.33726e-06	0.221478	0.148 to 0.309
TG(56:7) [NL-20:5]		0.0106971	-0.036 to 0.057	0.650566	0.997793	0.00929634	-0.034 to 0.068	0.0197302	-0.063 to 0.102	0.638448	0.692917	0.0188754	-0.066 to 0.095
TG(56:7) [NL-22:5](a)		0.018595	-0.027 to 0.064	0.423491	0.997793	0.0181418	-0.021 to 0.07	0.172284	0.093 to 0.252	2.46992e-05	0.000108901	0.170986	0.092 to 0.259
TG(56:7) [NL-22:5](b)		0.0184522	-0.027 to 0.064	0.427016	0.997793	0.0183366	-0.027 to 0.063	0.172324	0.093 to 0.252	2.45554e-05	0.000108886	0.174469	0.074 to 0.253
TG(56:7) [NL-22:6]		0.0175686	-0.027 to 0.062	0.441176	0.997793	0.0172311	-0.027 to 0.058	0.0949445	0.016 to 0.174	0.0188634	0.0340418	0.0954793	0.017 to 0.166
TG(56:8) [NL-20:4]		0.0271973	-0.02 to 0.074	0.256082	0.997793	0.0275603	-0.024 to 0.075	0.256284	0.175 to 0.337	1.08121e-09	2.99651e-08	0.257113	0.167 to 0.339
TG(56:8) [NL-20:5]		0.0122753	-0.034 to 0.059	0.605684	0.997793	0.0124859	-0.032 to 0.059	0.141578	0.06 to 0.223	0.000752712	0.00202814	0.143864	0.069 to 0.221
TG(56:8) [NL-22:6]		0.0204308	-0.025 to 0.066	0.375734	0.997793	0.0195822	-0.027 to 0.067	0.187159	0.108 to 0.266	4.27483e-06	2.51308e-05	0.187179	0.11 to 0.265
TG(56:9) [NL-22:6]		0.0218713	-0.024 to 0.067	0.34725	0.997793	0.0211442	-0.028 to 0.064	0.168895	0.089 to 0.249	4.19756e-05	0.000167202	0.168413	0.095 to 0.245
TG(58:10) [NL-22:6]		0.00935973	-0.037 to 0.055	0.690647	0.997793	0.00991258	-0.035 to 0.058	0.188383	0.108 to 0.269	6.03674e-06	3.29895e-05	0.190372	0.102 to 0.263
TG(58:8) [NL-22:6]		0.0137357	-0.033 to 0.06	0.560818	0.997793	0.013197	-0.031 to 0.057	0.123528	0.042 to 0.205	0.00318635	0.00722984	0.124053	0.041 to 0.192
TG(58:9) [NL-22:6]		0.0182551	-0.028 to 0.065	0.440144	0.997793	0.019334	-0.029 to 0.066	0.168311	0.087 to 0.25	5.8767e-05	0.000221375	0.167895	0.098 to 0.247
TG(O-50:1) [SIM]		-0.00711971	-0.052 to 0.038	0.757283	0.997793	-0.00615211	-0.057 to 0.037	-0.0829111	-0.163 to -0.003	0.0432758	0.0695279	-0.0831792	-0.168 to 0.016
TG(O-50:2) [SIM]		-0.00282335	-0.049 to 0.043	0.904923	0.997793	-0.00199653	-0.057 to 0.048	-0.0889012	-0.171 to -0.006	0.0349656	0.0579771	-0.0887628	-0.178 to 0.019
TG(O-50:3) [SIM]		0.000450003	-0.047 to 0.048	0.985185	0.997793	-0.00126262	-0.051 to 0.048	-0.188318	-0.272 to -0.105	1.10527e-05	5.39427e-05	-0.186395	-0.282 to -0.1
TG(O-52:0) [SIM]		-0.00145836	-0.047 to 0.044	0.950425	0.997793	-0.00235459	-0.049 to 0.051	-0.0656301	-0.148 to 0.016	0.117781	0.164978	-0.0685554	-0.143 to 0.031
TG(O-52:1) [SIM]		-0.0122551	-0.057 to 0.033	0.59242	0.997793	-0.0123825	-0.054 to 0.033	-0.099618	-0.179 to -0.02	0.0143455	0.0269543	-0.0992357	-0.183 to -0.015
TG(O-52:2) [SIM]		-0.00987597	-0.055 to 0.035	0.665714	0.997793	-0.0101361	-0.057 to 0.034	-0.0903039	-0.17 to -0.011	0.0264269	0.0455718	-0.0931027	-0.167 to -0.003
TG(O-54:2) [SIM]		-0.0117596	-0.056 to 0.033	0.606429	0.997793	-0.011874	-0.058 to 0.029	-0.100758	-0.18 to -0.022	0.0129879	0.0247024	-0.103188	-0.178 to -0.01
TG(O-54:3) [SIM]		-0.00501795	-0.05 to 0.04	0.827119	0.997793	-0.00533556	-0.052 to 0.04	-0.0689422	-0.149 to 0.011	0.0920363	0.134501	-0.0688377	-0.146 to 0.026
TG(O-54:4) [SIM]		-0.0089402	-0.054 to 0.036	0.69803	0.997793	-0.00877686	-0.055 to 0.035	-0.0494019	-0.13 to 0.031	0.227933	0.292357	-0.0487825	-0.133 to 0.035
TG(O-50:1) [NL-15:0]		-0.0152852	-0.061 to 0.03	0.508386	0.997793	-0.0148415	-0.063 to 0.028	-0.064996	-0.146 to 0.016	0.114244	0.160603	-0.0631627	-0.144 to 0.028
TG(O-50:1) [NL-16:0]		-0.009727	-0.055 to 0.035	0.672229	0.997793	-0.00930636	-0.056 to 0.04	-0.0683145	-0.148 to 0.012	0.0947798	0.137991	-0.0686437	-0.14 to 0.022
TG(O-50:1) [NL-17:1]		-0.00198643	-0.047 to 0.043	0.93161	0.997793	-0.0024533	-0.052 to 0.044	-0.0668212	-0.147 to 0.014	0.104919	0.149664	-0.0654813	-0.145 to 0.028
TG(O-50:1) [NL-18:1]		-0.0130269	-0.058 to 0.032	0.571564	0.997793	-0.0144512	-0.058 to 0.035	-0.0776299	-0.158 to 0.002	0.0578352	0.0899402	-0.0756123	-0.162 to 0.006
TG(O-50:2) [NL-16:1]		-0.0152491	-0.062 to 0.031	0.521863	0.997793	-0.0156484	-0.06 to 0.034	-0.0815814	-0.165 to 0.001	0.0544783	0.0850607	-0.0824625	-0.165 to 0.008
TG(O-50:2) [NL-18:1]		-0.00538656	-0.051 to 0.04	0.815902	0.997793	-0.00661204	-0.057 to 0.041	-0.134726	-0.215 to -0.055	0.00103911	0.00264377	-0.135115	-0.22 to -0.054
TG(O-50:2) [NL-18:2]		-0.011746	-0.058 to 0.035	0.62066	0.997793	-0.0120092	-0.061 to 0.037	-0.0706737	-0.153 to 0.012	0.0945476	0.137912	-0.0690726	-0.164 to 0.023
TG(O-50:3) [NL-18:2]		-0.0201938	-0.067 to 0.026	0.396731	0.997793	-0.0202239	-0.075 to 0.03	-0.173568	-0.256 to -0.091	4.03994e-05	0.000163576	-0.174729	-0.267 to -0.09
TG(O-52:0) [NL-16:0]		-0.0135364	-0.059 to 0.031	0.55546	0.997793	-0.0132641	-0.057 to 0.031	-0.101697	-0.181 to -0.022	0.0127002	0.0242147	-0.10108	-0.179 to -0.02
TG(O-52:1) [NL-16:0]		-0.0137983	-0.059 to 0.031	0.547059	0.997793	-0.0144587	-0.055 to 0.03	-0.102272	-0.182 to -0.023	0.0120187	0.0233162	-0.104229	-0.169 to -0.014
TG(O-52:1) [NL-18:1]		-0.0152157	-0.06 to 0.03	0.506338	0.997793	-0.0155369	-0.06 to 0.032	-0.110153	-0.189 to -0.031	0.00664142	0.013817	-0.111426	-0.182 to -0.029
TG(O-52:2) [NL-16:0]		-0.0162054	-0.061 to 0.028	0.477584	0.997793	-0.0158982	-0.063 to 0.031	-0.0980038	-0.177 to -0.019	0.015607	0.0288672	-0.0964952	-0.179 to -0.013
TG(O-52:2) [NL-17:1]		-0.0078032	-0.053 to 0.037	0.732666	0.997793	-0.00777345	-0.056 to 0.04	-0.0817926	-0.161 to -0.002	0.0441417	0.0707727	-0.0808684	-0.163 to 0.01
TG(O-52:2) [NL-18:1]		-0.0132748	-0.058 to 0.031	0.561239	0.997793	-0.0142526	-0.062 to 0.03	-0.0981793	-0.178 to -0.019	0.015624	0.0288672	-0.098289	-0.19 to -0.015
TG(O-54:2) [NL-17:1]		-0.0104055	-0.055 to 0.034	0.648963	0.997793	-0.0104467	-0.055 to 0.034	-0.106721	-0.186 to -0.028	0.00849261	0.017207	-0.10731	-0.18 to -0.018
TG(O-54:2) [NL-18:1]		-0.0124463	-0.057 to 0.032	0.58595	0.997793	-0.0118861	-0.059 to 0.03	-0.116519	-0.196 to -0.037	0.00405929	0.00905175	-0.11722	-0.195 to -0.032
TG(O-54:3) [NL-17:1]		-0.0187238	-0.064 to 0.027	0.418544	0.997793	-0.0193126	-0.064 to 0.028	-0.0878751	-0.168 to -0.007	0.0328494	0.0548196	-0.0897351	-0.173 to -0.008
TG(O-54:3) [NL-18:1]		-0.0153571	-0.06 to 0.029	0.501798	0.997793	-0.0151304	-0.059 to 0.028	-0.111553	-0.191 to -0.032	0.00606576	0.0127562	-0.111527	-0.189 to -0.026
TG(O-54:4) [NL-17:1]		-0.0138811	-0.06 to 0.032	0.553456	0.997793	-0.0129655	-0.057 to 0.03	-0.0123685	-0.094 to 0.069	0.765348	0.804292	-0.0122774	-0.106 to 0.078
TG(O-54:4) [NL-18:2]		-0.0082019	-0.054 to 0.037	0.724917	0.997793	-0.0098237	-0.059 to 0.044	-0.111028	-0.192 to -0.03	0.0075555	0.0154698	-0.109002	-0.202 to -0.03
Ubiquinone		0.0313894	-0.016 to 0.078	0.191729	0.997793	0.0316097	-0.012 to 0.073	-0.0958597	-0.179 to -0.012	0.0248913	0.0437735	-0.0967993	-0.187 to -0.006
CE(18:2) [+OH]		0.0292767	-0.017 to 0.076	0.218995	0.997793	0.0267678	-0.017 to 0.104	-0.00734552	-0.091 to 0.076	0.863416	0.885918	-0.0080463	-0.1 to 0.076
CE(20:4) [+OH]		0.0369186	-0.01 to 0.084	0.121473	0.997793	0.0358151	-0.009 to 0.083	-0.0149596	-0.098 to 0.068	0.724458	0.769055	-0.0134674	-0.106 to 0.068
CE(22:6) [+OH]		-0.00183257	-0.049 to 0.045	0.938836	0.997793	-0.00297784	-0.045 to 0.039	-0.0803894	-0.164 to 0.003	0.0588488	0.0912414	-0.0797739	-0.157 to 0.012
LPC(18:2) [+OH]		-0.00969794	-0.036 to 0.017	0.471067	0.997793	-0.00958922	-0.037 to 0.015	0.0350659	-0.012 to 0.082	0.143816	0.194766	0.036412	-0.01 to 0.084
LPC(20:4) [+OH]		0.000987174	-0.023 to 0.025	0.936307	0.997793	0.000962044	-0.023 to 0.023	0.0187769	-0.024 to 0.062	0.390689	0.462157	0.0204774	-0.023 to 0.061
LPC(22:6) [+OH]		-0.00705179	-0.029 to 0.015	0.531288	0.997793	-0.00665448	-0.026 to 0.013	0.0119056	-0.027 to 0.051	0.553784	0.619216	0.0126453	-0.029 to 0.056
PC(34:2) [+OH]		0.0201595	-0.026 to 0.067	0.397171	0.997793	0.0206963	-0.04 to 0.083	0.0243014	-0.059 to 0.108	0.568083	0.629761	0.0248451	-0.057 to 0.101
PC(36:4) [+OH]		0.00473269	-0.041 to 0.051	0.840482	0.997793	0.00476156	-0.041 to 0.056	-0.00803841	-0.09 to 0.073	0.846847	0.871556	-0.00805008	-0.091 to 0.071
PC(38:6) [+OH]		-0.0181151	-0.064 to 0.028	0.439659	0.997793	-0.0183241	-0.063 to 0.027	-0.176771	-0.257 to -0.097	1.77781e-05	8.31073e-05	-0.178272	-0.257 to -0.096
Regression coefficients (β) are estimated difference in log lipidomic measure at 6 months of age (SD units) per 1 increase in total parent-reported infections from birth to 6 months of age, or per 1 SD increase in 6-month log GlycA.
Models are adjusted for infant sex, birth weight z-score, gestational age, exact age at 6-month time point, maternal household income, exposure to any breastfeeding, exposure to any maternal smoking during pregnancy, and 6-month blood sample processing time.
Adjusted p-values are based on the Benjamini-Hochberg method of adjustment for multiple comparisons.
Bootstrap estimates are calculated as the mean coefficent across 1000 iterations of bootstrap resampling.
Bootstrap 95% confidence intervals are bias-corrected accelerated percentile confidence intervals.
