# Supplementary material for: Early life infection and proinflammatory, atherogenic metabolomic and lipidomic profiles in infancy: a population-based cohort study
Source: eLife. 2022 May 10;11:e75170. doi: 10.7554/eLife.75170 (PMC9090335; doi:10.7554/eLife.75170)
Supplement: Figure 5—source data 3. [file elife-75170-fig5-data3.xlsx]

## Sheet: Figure 5 - Source Data 2
Figure 5 - Source Data 3. Summary of regression models for difference in 12-month LC/MS lipidomic measures (adjusted for corresponding 6-month measure) per 1 increase in parent-reported infection from 6 to 12 months of age (adjusted for infections from birth to 6 months) or per SD increase in 12-month log GlycA (adjusted for 6-month GlycA).
		Parent reported infections from 6 to 12 months (adjusted for infections from birth to 6 months)						12-month GlycA (adjusted for 6-month GlycA)
Measure	Class Name	Estimate (β)	95% Confidence Interval	P-value	Adj. P-value	Bootstrap Estimate	Bootstrap 95% Confidence Interval	Estimate (β)	95% Confidence Interval	P-value	Adj. P-value	Bootstrap Estimate	Bootstrap 95% Confidence Interval
Total Sph	Sphingosines	0.00642426	-0.022 to 0.035	0.657845	0.801748	0.0083737	-0.039 to 0.037	0.120345	0.053 to 0.188	0.000521656	0.00145318	0.120226	0.056 to 0.188
Total S1P	Sphingosine phosphates	-0.0152507	-0.043 to 0.013	0.286222	0.558134	-0.0126627	-0.071 to 0.016	-0.0764291	-0.143 to -0.01	0.0255233	0.0474004	-0.0758643	-0.135 to -0.016
Total dhCer	Dihydro-ceramides	0.0101237	-0.025 to 0.045	0.571903	0.769111	0.00934814	-0.021 to 0.048	0.0780598	-0.006 to 0.162	0.0683039	0.106554	0.0782211	-0.011 to 0.166
Total Cer	Ceramides	0.0192091	-0.019 to 0.057	0.322245	0.598455	0.0189421	-0.02 to 0.053	0.159613	0.07 to 0.25	0.000564946	0.00146886	0.157025	0.067 to 0.244
Total C1P	Ceramide-1-phosphate	-0.0533434	-0.091 to -0.015	0.00630228	0.0931563	-0.0535489	-0.092 to -0.014	-0.209932	-0.3 to -0.12	6.86572e-06	2.67763e-05	-0.210672	-0.314 to -0.121
Total MHC	Hexosyl-ceramides	0.0138312	-0.02 to 0.048	0.42985	0.698506	0.0135859	-0.023 to 0.052	0.0686699	-0.013 to 0.151	0.100956	0.151434	0.0660117	-0.019 to 0.172
Total DHC	Di-hexosyl-ceramides	0.0422472	0.003 to 0.081	0.0352593	0.229186	0.0426611	0.002 to 0.079	0.332582	0.243 to 0.422	1.35292e-12	2.6382e-11	0.332391	0.243 to 0.423
Total THC	Tri-hexosyl-ceramides	-0.0349845	-0.072 to 0.002	0.063967	0.261503	-0.0361426	-0.072 to 0.004	-0.145386	-0.233 to -0.058	0.00122719	0.00265892	-0.146793	-0.239 to -0.057
Total GM3	GM3-gangliosides	0.0160845	-0.021 to 0.054	0.401443	0.680707	0.0161531	-0.019 to 0.053	0.198545	0.11 to 0.287	1.35907e-05	4.81851e-05	0.194151	0.108 to 0.308
Total GM1	GM1-gangliosides	0.0232624	-0.015 to 0.061	0.231898	0.476001	0.0228679	-0.016 to 0.064	0.0939535	0.003 to 0.185	0.0442951	0.0751091	0.0912703	0 to 0.196
Total Sulfatide	Sulfatides	-0.0286594	-0.065 to 0.008	0.127043	0.378951	-0.0280645	-0.064 to 0.007	-0.107415	-0.195 to -0.02	0.0166749	0.0325161	-0.108253	-0.196 to -0.024
Total SM	Sphingomyelins	0.00241709	-0.037 to 0.042	0.904342	0.994645	0.00280227	-0.034 to 0.04	0.0717127	-0.022 to 0.166	0.134759	0.187699	0.070612	-0.033 to 0.17
Total PA	Phosphatidic acid	0.00701882	-0.017 to 0.031	0.560858	0.769111	0.00742944	-0.021 to 0.028	-0.0599293	-0.117 to -0.003	0.038872	0.0689095	-0.0612225	-0.141 to 0
Total PC	Phosphatidylcholines	0.0345883	-0.005 to 0.074	0.0891306	0.316009	0.0334132	-0.001 to 0.071	0.0468834	-0.049 to 0.143	0.337257	0.398577	0.0428644	-0.05 to 0.148
Total PC_O	Alkyl phosphatidylcholines	0.0266643	-0.011 to 0.064	0.166727	0.406397	0.0263067	-0.009 to 0.063	-0.010763	-0.101 to 0.08	0.815606	0.859692	-0.0107859	-0.106 to 0.084
Total PC_P	Alkenyl phosphatidylcholines	-0.0156969	-0.051 to 0.019	0.37813	0.670322	-0.0165607	-0.048 to 0.022	-0.237055	-0.317 to -0.157	1.28095e-08	7.13673e-08	-0.237734	-0.319 to -0.135
Total LPC	Lysophosphatidylcholines	-0.0066269	-0.036 to 0.023	0.656156	0.801748	-0.0057281	-0.046 to 0.022	-0.0136978	-0.084 to 0.056	0.701583	0.781764	-0.0136163	-0.077 to 0.056
Total LPC_O	Lysoalkyl phosphatidylcholines	0.0077813	-0.017 to 0.032	0.536615	0.769111	0.00916756	-0.034 to 0.034	0.0362304	-0.023 to 0.096	0.232174	0.29209	0.0351152	-0.025 to 0.091
Total LPC_P	Lysoalkenyl phosphatidylcholines	-0.0306123	-0.056 to -0.005	0.0189736	0.153607	-0.0293983	-0.067 to -0.004	-0.117761	-0.178 to -0.057	0.000157121	0.000471364	-0.116575	-0.174 to -0.057
Total PE	Phosphatidylethanolamines	0.051872	0.014 to 0.09	0.00716587	0.0931563	0.0518992	0.012 to 0.093	0.297612	0.211 to 0.384	4.35716e-11	4.24823e-10	0.297091	0.205 to 0.386
Total PE_O	Alkylphosphatidylethanolamines	-0.0244961	-0.062 to 0.013	0.197185	0.452366	-0.0245943	-0.058 to 0.011	-0.28926	-0.375 to -0.204	8.80777e-11	6.87006e-10	-0.287325	-0.381 to -0.209
Total PE_P	Alkenylphosphatidylethanolamines	-0.0371241	-0.074 to -0.001	0.0469714	0.261503	-0.0376747	-0.067 to -0.002	-0.179099	-0.265 to -0.093	5.68231e-05	0.000184675	-0.176257	-0.27 to -0.096
Total LPE	Lysophosphatidylethanolamines	0.00562051	-0.031 to 0.042	0.763525	0.902348	0.00615303	-0.031 to 0.047	0.0873343	0 to 0.175	0.0508131	0.0825712	0.0872588	0.01 to 0.163
Total LPE_P	Lysoalkenylphosphatidylethanolamines	-0.025386	-0.052 to 0.001	0.057553	0.261503	-0.0241402	-0.061 to 0.002	-0.000809373	-0.064 to 0.062	0.98	0.98	0.000737314	-0.064 to 0.06
Total PI	Phosphatidylinositols	0.0247811	-0.015 to 0.065	0.223258	0.476001	0.0255121	-0.012 to 0.063	0.0658224	-0.03 to 0.161	0.1773	0.238437	0.0687498	-0.034 to 0.167
Total PIP1	Phosphatidylinositol phosphate	-0.001228	-0.038 to 0.036	0.948323	0.994645	-0.00132278	-0.039 to 0.038	-0.0692209	-0.158 to 0.02	0.12781	0.184614	-0.0696461	-0.148 to 0.018
Total LPI	Lysophosphatidylinositols	0.0135568	-0.025 to 0.052	0.492889	0.768907	0.0141214	-0.024 to 0.05	0.157346	0.066 to 0.248	0.000770821	0.00176835	0.156434	0.067 to 0.247
Total PS	Phosphatidylserines	-0.000878556	-0.03 to 0.028	0.953242	0.994645	0.00062417	-0.039 to 0.03	0.12097	0.051 to 0.191	0.000713118	0.00173823	0.121242	0.03 to 0.192
Total PG	Phosphatidylglycerols	0.027885	-0.01 to 0.066	0.15385	0.400009	0.0265933	-0.014 to 0.067	0.242531	0.153 to 0.332	1.76244e-07	8.59188e-07	0.245121	0.13 to 0.332
Total CE	Cholesteryl esters	-0.0302393	-0.07 to 0.009	0.136034	0.378951	-0.0294481	-0.071 to 0.008	-0.247333	-0.34 to -0.155	2.35742e-07	1.02155e-06	-0.245064	-0.345 to -0.164
Total COH	Free cholesterol	-0.00370502	-0.042 to 0.035	0.851082	0.976241	-0.00490641	-0.039 to 0.034	0.0586755	-0.034 to 0.151	0.214588	0.278964	0.0575899	-0.046 to 0.159
Total DE	Dehydro-cholesteryl esters	-0.0723695	-0.112 to -0.033	0.000374077	0.014589	-0.0723383	-0.111 to -0.03	-0.416684	-0.504 to -0.329	5.04088e-19	1.96594e-17	-0.416517	-0.502 to -0.332
Total FFA	Free fatty acids	-0.000123227	-0.032 to 0.032	0.993935	0.994645	0.000311509	-0.035 to 0.029	-0.0447777	-0.121 to 0.032	0.251125	0.306058	-0.041739	-0.121 to 0.024
Total Acylcarnitine	Acylcarnitines	-0.0220914	-0.048 to 0.004	0.0981121	0.318864	-0.0205819	-0.054 to 0.005	-0.0894483	-0.152 to -0.027	0.00524205	0.01076	-0.0902869	-0.15 to -0.023
Total DG	Diacylglycerols	0.0348062	-0.002 to 0.072	0.067052	0.261503	0.0357036	-0.005 to 0.074	0.308994	0.225 to 0.393	2.8074e-12	3.64962e-11	0.310047	0.229 to 0.393
Total TG	Triacylglycerols	0.0477192	0.008 to 0.088	0.0196932	0.153607	0.0472938	0.006 to 0.091	0.285347	0.192 to 0.378	3.67769e-09	2.3905e-08	0.286745	0.199 to 0.379
Total TG_O	Alkyldiacylglycerols	-0.00949183	-0.047 to 0.028	0.618917	0.801748	-0.00887587	-0.055 to 0.033	0.0034839	-0.087 to 0.094	0.939743	0.964473	0.00653019	-0.092 to 0.099
Total Ubiquinone	Ubiquinone	-0.000125835	-0.037 to 0.037	0.994645	0.994645	-0.00081686	-0.035 to 0.035	0.0107318	-0.077 to 0.099	0.811527	0.859692	0.0100735	-0.085 to 0.106
Total OxSpecies	Oxidised species	0.0103036	-0.025 to 0.045	0.563017	0.769111	0.0103714	-0.023 to 0.05	0.0267671	-0.057 to 0.111	0.532621	0.610948	0.0265461	-0.063 to 0.123
Sph(d16:1)		-0.0170935	-0.055 to 0.021	0.381094	0.732001	-0.0154703	-0.059 to 0.015	-0.0088884	-0.101 to 0.083	0.850246	0.889206	-0.00697813	-0.112 to 0.077
Sph(d18:1)		0.00700261	-0.021 to 0.035	0.618475	0.857586	0.00758595	-0.039 to 0.039	0.129024	0.064 to 0.194	0.000123424	0.000469496	0.127317	0.068 to 0.192
Sph(d18:2)		0.0145353	-0.027 to 0.056	0.489509	0.778621	0.0127359	-0.027 to 0.054	-0.0667267	-0.166 to 0.032	0.188074	0.275889	-0.0658883	-0.163 to 0.032
S1P(d16:1)		-0.0133648	-0.043 to 0.016	0.376427	0.730268	-0.0134782	-0.052 to 0.018	-0.0768637	-0.147 to -0.006	0.0329599	0.0606088	-0.0743346	-0.15 to -0.009
S1P(d18:0)		-0.0138625	-0.044 to 0.016	0.370429	0.729493	-0.0112965	-0.071 to 0.022	-0.110977	-0.183 to -0.039	0.00266847	0.00676711	-0.110715	-0.173 to -0.05
S1P(d18:1)		-0.014412	-0.044 to 0.015	0.333716	0.701798	-0.0112896	-0.074 to 0.019	-0.0518807	-0.122 to 0.018	0.146511	0.224688	-0.0524465	-0.112 to 0.017
S1P(d18:2)		-0.019765	-0.047 to 0.007	0.152649	0.515025	-0.0185095	-0.061 to 0.01	-0.114098	-0.178 to -0.05	0.000522437	0.0017106	-0.115602	-0.176 to -0.055
Cer(d18:0/16:0)		0.0185273	-0.021 to 0.058	0.353536	0.721876	0.019166	-0.023 to 0.054	0.116518	0.024 to 0.209	0.0143925	0.0303494	0.114551	0.031 to 0.213
Cer(d18:0/18:0)		-0.002824	-0.04 to 0.035	0.882269	0.962098	-0.0034853	-0.04 to 0.039	0.200665	0.113 to 0.288	9.10017e-06	4.8368e-05	0.200967	0.103 to 0.292
Cer(d18:0/20:0)		-0.00765797	-0.045 to 0.03	0.690466	0.88856	-0.00807202	-0.043 to 0.033	0.114816	0.025 to 0.205	0.0124538	0.0269659	0.114776	0.02 to 0.212
Cer(d18:0/22:0)		0.0168782	-0.019 to 0.053	0.361765	0.721876	0.0166259	-0.02 to 0.054	0.0875475	0.001 to 0.174	0.0480391	0.0849165	0.0828814	0.005 to 0.189
Cer(d18:0/24:0)		-0.0061797	-0.041 to 0.028	0.725796	0.903991	-0.00640824	-0.043 to 0.027	-0.00477291	-0.087 to 0.078	0.909895	0.936314	-0.00239641	-0.088 to 0.077
Cer(d18:0/24:1)		0.0145214	-0.02 to 0.049	0.411804	0.736447	0.0137213	-0.019 to 0.051	0.0935566	0.011 to 0.176	0.0274912	0.0524157	0.0947334	0.007 to 0.183
Cer(d16:1/16:0)		0.0194264	-0.015 to 0.054	0.264984	0.652785	0.0185238	-0.016 to 0.054	0.0960807	0.014 to 0.178	0.0215919	0.0426344	0.0968855	0.016 to 0.171
Cer(d16:1/18:0)		0.0101055	-0.026 to 0.046	0.579347	0.832782	0.0104922	-0.03 to 0.044	0.0944343	0.009 to 0.18	0.0309778	0.0576469	0.0951447	0.002 to 0.174
Cer(d16:1/20:0)		0.0210514	-0.014 to 0.056	0.234482	0.610752	0.0204897	-0.013 to 0.059	0.0999903	0.017 to 0.183	0.018435	0.0375474	0.0983099	0.018 to 0.176
Cer(d16:1/22:0)		0.0073484	-0.027 to 0.042	0.676475	0.880779	0.00727755	-0.027 to 0.04	0.0493191	-0.033 to 0.132	0.240684	0.336524	0.049427	-0.031 to 0.124
Cer(d16:1/23:0)		2.34162e-06	-0.035 to 0.035	0.999895	0.999895	-9.62443e-05	-0.033 to 0.036	-0.0258228	-0.11 to 0.058	0.545902	0.643799	-0.0269869	-0.108 to 0.049
Cer(d16:1/24:0)		-0.00614876	-0.041 to 0.029	0.728639	0.904679	-0.00621898	-0.04 to 0.029	-0.0613954	-0.144 to 0.022	0.148147	0.226303	-0.0611519	-0.144 to 0.013
Cer(d16:1/24:1)		0.00458237	-0.032 to 0.041	0.803818	0.933658	0.00331306	-0.033 to 0.044	0.128275	0.042 to 0.214	0.0036914	0.00915185	0.127542	0.043 to 0.217
Cer(d17:1/16:0)		0.0189525	-0.018 to 0.056	0.311849	0.68283	0.0182123	-0.02 to 0.056	0.111875	0.025 to 0.199	0.0123843	0.0269193	0.112206	0.033 to 0.206
Cer(d17:1/18:0)		0.0271786	-0.012 to 0.066	0.174488	0.548315	0.0269874	-0.011 to 0.066	0.170731	0.078 to 0.264	0.000352787	0.00121134	0.175612	0.076 to 0.267
Cer(d17:1/20:0)		0.0282611	-0.009 to 0.066	0.141735	0.490069	0.0271853	-0.009 to 0.066	0.121387	0.032 to 0.211	0.00825108	0.0186672	0.121401	0.033 to 0.208
Cer(d17:1/22:0)		0.00601879	-0.03 to 0.042	0.74283	0.909205	0.00614269	-0.031 to 0.042	0.0869857	0.001 to 0.173	0.0476059	0.0845358	0.0864461	0.008 to 0.166
Cer(d17:1/23:0)		0.00271187	-0.033 to 0.039	0.88335	0.962098	0.00216363	-0.034 to 0.037	-0.0142179	-0.101 to 0.073	0.748247	0.820112	-0.0178453	-0.097 to 0.075
Cer(d17:1/24:0)		-0.00431094	-0.04 to 0.031	0.813068	0.936114	-0.0056271	-0.038 to 0.033	-0.0319933	-0.118 to 0.054	0.464931	0.570865	-0.0321227	-0.115 to 0.05
Cer(d17:1/24:1)		0.0152766	-0.021 to 0.052	0.411806	0.736447	0.0141919	-0.02 to 0.056	0.13451	0.048 to 0.221	0.00250576	0.00648156	0.133748	0.042 to 0.214
Cer(d18:1/14:0)		0.0395011	0.004 to 0.075	0.0303586	0.242431	0.0385224	0.002 to 0.075	0.10504	0.019 to 0.191	0.0165576	0.0342631	0.105253	0.031 to 0.19
Cer(d18:1/16:0)		0.044933	0.007 to 0.083	0.0219962	0.216064	0.0446239	0.008 to 0.082	0.272213	0.183 to 0.362	4.7476e-09	8.00899e-08	0.270722	0.183 to 0.376
Cer(d18:1/17:0)		0.000960711	-0.034 to 0.035	0.956463	0.979375	0.00157519	-0.034 to 0.033	0.020927	-0.062 to 0.104	0.621246	0.711043	0.0193343	-0.064 to 0.099
Cer(d18:1/18:0)		0.0369264	-0.002 to 0.076	0.0623594	0.322606	0.0349522	-0.001 to 0.08	0.335598	0.247 to 0.424	4.53096e-13	4.39504e-11	0.334411	0.239 to 0.427
Cer(d18:1/19:0)		0.0273351	-0.011 to 0.065	0.159793	0.529913	0.0261938	-0.014 to 0.072	0.208127	0.119 to 0.298	6.73693e-06	3.7883e-05	0.206669	0.114 to 0.296
Cer(d18:1/20:0)		0.0487082	0.01 to 0.087	0.0130369	0.171468	0.0485018	0.006 to 0.085	0.359538	0.273 to 0.446	3.40697e-15	5.28762e-13	0.356821	0.269 to 0.449
Cer(d18:1/21:0)		0.0362625	-0.002 to 0.075	0.066307	0.334119	0.0352206	-0.001 to 0.08	0.200531	0.11 to 0.291	1.80515e-05	8.70059e-05	0.200162	0.115 to 0.289
Cer(d18:1/22:0)		0.0366122	-0.002 to 0.075	0.0648255	0.328788	0.0363613	-0.001 to 0.076	0.28657	0.197 to 0.376	7.73946e-10	1.58048e-08	0.282537	0.189 to 0.373
Cer(d18:1/23:0)		0.00466298	-0.033 to 0.043	0.810788	0.934875	0.00546403	-0.034 to 0.042	0.108828	0.018 to 0.2	0.0194901	0.0391822	0.107561	0.013 to 0.194
Cer(d18:1/24:0)		0.0147994	-0.025 to 0.054	0.461794	0.771734	0.0148975	-0.027 to 0.053	0.143914	0.05 to 0.238	0.00273209	0.00690586	0.142344	0.056 to 0.224
Cer(d18:1/24:1)		0.0310235	-0.008 to 0.07	0.119571	0.473405	0.0308222	-0.007 to 0.073	0.324847	0.235 to 0.414	4.30498e-12	2.56974e-10	0.323366	0.228 to 0.426
Cer(d18:1/26:0)		0.00566164	-0.031 to 0.042	0.761357	0.918838	0.00541052	-0.028 to 0.046	0.0274096	-0.06 to 0.115	0.540436	0.640725	0.0262339	-0.056 to 0.123
Cer(d18:2/14:0)		0.0345381	-0.005 to 0.074	0.0900226	0.408524	0.0341054	-0.004 to 0.076	-0.122555	-0.217 to -0.028	0.0114568	0.0249733	-0.124355	-0.204 to -0.037
Cer(d18:2/16:0)		0.0200865	-0.016 to 0.057	0.281128	0.661076	0.0208924	-0.014 to 0.057	-0.00109961	-0.089 to 0.087	0.980469	0.988109	-0.00112829	-0.083 to 0.093
Cer(d18:2/17:0)		-0.0215221	-0.06 to 0.017	0.279047	0.660672	-0.0231085	-0.059 to 0.019	-0.0122643	-0.106 to 0.082	0.798015	0.858199	-0.00958051	-0.115 to 0.075
Cer(d18:2/18:0)		0.00258819	-0.034 to 0.04	0.891199	0.965845	0.00198077	-0.039 to 0.045	0.11497	0.027 to 0.203	0.0110236	0.0241648	0.112635	0.025 to 0.2
Cer(d18:2/20:0)		0.0281479	-0.01 to 0.066	0.147242	0.503347	0.0267556	-0.005 to 0.067	0.127602	0.037 to 0.218	0.00594527	0.0138962	0.127079	0.041 to 0.208
Cer(d18:2/21:0)		0.00769442	-0.031 to 0.046	0.693902	0.888561	0.00717178	-0.034 to 0.045	0.0701217	-0.022 to 0.162	0.13459	0.207638	0.0674043	-0.014 to 0.157
Cer(d18:2/22:0)		0.00824045	-0.029 to 0.045	0.663126	0.880051	0.00843503	-0.028 to 0.04	0.0836247	-0.005 to 0.172	0.064872	0.109914	0.0834663	-0.008 to 0.164
Cer(d18:2/23:0)		-0.00480736	-0.041 to 0.032	0.796609	0.933658	-0.00516059	-0.038 to 0.03	-0.0126304	-0.1 to 0.075	0.777615	0.842778	-0.0116807	-0.093 to 0.068
Cer(d18:2/24:0)		0.00160066	-0.037 to 0.04	0.934473	0.976354	0.00204777	-0.033 to 0.041	0.00687671	-0.085 to 0.099	0.883221	0.916282	0.00561983	-0.081 to 0.087
Cer(d18:2/24:1)		0.0127942	-0.024 to 0.05	0.496183	0.78388	0.0132116	-0.024 to 0.047	0.149958	0.062 to 0.238	0.000857938	0.00252182	0.149563	0.069 to 0.237
Cer(d18:2/26:0)		-0.0201781	-0.057 to 0.017	0.289421	0.661556	-0.0214334	-0.051 to 0.021	-0.0332852	-0.123 to 0.056	0.466363	0.571719	-0.0344646	-0.12 to 0.073
Cer(d19:1/16:0)		0.0050132	-0.034 to 0.045	0.803694	0.933658	0.00371443	-0.032 to 0.049	0.0996345	0.005 to 0.194	0.0391998	0.0710725	0.0985035	0.005 to 0.195
Cer(d19:1/18:0)		0.0169497	-0.023 to 0.056	0.400502	0.736447	0.0149369	-0.021 to 0.057	0.122381	0.028 to 0.216	0.0109689	0.0241648	0.123863	0.026 to 0.204
Cer(d19:1/20:0)		0.0460477	0.007 to 0.085	0.0197071	0.206658	0.0440911	0.009 to 0.094	0.0955256	0.003 to 0.188	0.0426513	0.0769707	0.0974898	0.008 to 0.185
Cer(d19:1/22:0)		0.0200059	-0.019 to 0.059	0.312377	0.68283	0.0180097	-0.018 to 0.061	0.0468795	-0.046 to 0.139	0.321663	0.422353	0.0448366	-0.039 to 0.142
Cer(d19:1/23:0)		0.00748768	-0.031 to 0.046	0.704932	0.889832	0.00601433	-0.034 to 0.044	-0.0398419	-0.132 to 0.053	0.398627	0.505449	-0.0392945	-0.12 to 0.055
Cer(d19:1/24:0)		0.0126844	-0.026 to 0.051	0.515975	0.791142	0.0116494	-0.028 to 0.052	-0.0399425	-0.131 to 0.051	0.390764	0.498739	-0.039049	-0.119 to 0.058
Cer(d19:1/24:1)		0.0255293	-0.012 to 0.063	0.184019	0.551914	0.0241624	-0.011 to 0.063	0.0588403	-0.031 to 0.149	0.199728	0.28862	0.0606527	-0.032 to 0.141
Cer(d19:1/26:0)		-0.00177772	-0.039 to 0.036	0.926409	0.976354	-0.00169332	-0.044 to 0.038	-0.0606568	-0.151 to 0.029	0.186564	0.274192	-0.0570876	-0.15 to 0.024
Cer(d20:1/22:0)		0.00512565	-0.032 to 0.043	0.788713	0.93157	0.00440964	-0.035 to 0.04	0.127209	0.038 to 0.216	0.00542563	0.012915	0.127533	0.033 to 0.221
Cer(d20:1/23:0)		0.00365358	-0.036 to 0.043	0.855269	0.953693	0.00294493	-0.035 to 0.048	0.0228494	-0.071 to 0.117	0.63473	0.720103	0.0225623	-0.079 to 0.114
Cer(d20:1/24:0)		-0.00108783	-0.036 to 0.034	0.952007	0.978486	-0.00162601	-0.044 to 0.035	-0.00175828	-0.087 to 0.083	0.967599	0.980182	-0.00141393	-0.09 to 0.073
Cer(d20:1/24:1)		0.0169845	-0.019 to 0.053	0.361557	0.721876	0.0164856	-0.023 to 0.052	0.156206	0.07 to 0.243	0.000448357	0.00148686	0.158602	0.062 to 0.246
Cer(d20:1/26:0)		-0.00298671	-0.042 to 0.036	0.879788	0.962098	-0.00302691	-0.038 to 0.038	0.02215	-0.07 to 0.115	0.639191	0.723049	0.0237887	-0.064 to 0.109
Cer(m18:0/20:0)		0.0138772	-0.024 to 0.052	0.471923	0.77775	0.0139711	-0.021 to 0.052	0.0785309	-0.012 to 0.169	0.0900858	0.146555	0.0795535	-0.008 to 0.182
Cer(m18:0/22:0)		0.0260918	-0.011 to 0.063	0.167969	0.53861	0.0260814	-0.01 to 0.063	0.0682025	-0.021 to 0.157	0.133846	0.207315	0.068396	-0.009 to 0.154
Cer(m18:0/23:0)		0.00946073	-0.028 to 0.047	0.617211	0.857586	0.00787909	-0.024 to 0.048	-0.0166144	-0.106 to 0.072	0.714694	0.790032	-0.0154825	-0.109 to 0.075
Cer(m18:0/24:0)		0.0219342	-0.016 to 0.06	0.253579	0.64097	0.0214837	-0.016 to 0.059	0.00570913	-0.085 to 0.096	0.901654	0.931669	0.00256386	-0.079 to 0.102
Cer(m18:0/24:1)		0.037098	0 to 0.074	0.0490274	0.283412	0.0364138	0.003 to 0.075	0.152232	0.064 to 0.24	0.000763011	0.00230388	0.149007	0.065 to 0.25
Cer(m18:1/18:0)		0.00325298	-0.032 to 0.039	0.857832	0.953693	0.00333349	-0.03 to 0.043	0.0847598	0 to 0.17	0.0513362	0.0897227	0.0850396	-0.001 to 0.178
Cer(m18:1/20:0)		0.0362495	0 to 0.072	0.0500353	0.283412	0.0366328	0.001 to 0.072	0.0544188	-0.032 to 0.141	0.220229	0.311056	0.0563345	-0.035 to 0.141
Cer(m18:1/22:0)		0.0362854	-0.001 to 0.074	0.0581867	0.317978	0.0352526	0.003 to 0.074	0.00343895	-0.087 to 0.093	0.940301	0.9602	0.00378984	-0.092 to 0.084
Cer(m18:1/23:0)		0.0141576	-0.022 to 0.05	0.443973	0.75388	0.0144701	-0.021 to 0.047	-0.042026	-0.129 to 0.045	0.344093	0.448014	-0.0428654	-0.131 to 0.037
Cer(m18:1/24:0)		0.029756	-0.008 to 0.068	0.123286	0.476185	0.0294657	-0.007 to 0.069	-0.038189	-0.129 to 0.053	0.410083	0.51828	-0.0378733	-0.126 to 0.051
Cer(m18:1/24:1)		0.0508682	0.015 to 0.087	0.00597621	0.150871	0.0512587	0.018 to 0.085	0.0795418	-0.008 to 0.167	0.0745308	0.123094	0.0802483	-0.007 to 0.165
Cer1P(d18:1/16:0)		-0.0533434	-0.091 to -0.015	0.00630228	0.150871	-0.0532173	-0.091 to -0.014	-0.209932	-0.3 to -0.12	6.86572e-06	3.83295e-05	-0.210716	-0.294 to -0.13
HexCer(d16:1/18:0)		-0.0346143	-0.071 to 0.001	0.0602445	0.320522	-0.0358697	-0.073 to 0.004	-0.153934	-0.239 to -0.069	0.000428407	0.00143295	-0.155035	-0.25 to -0.069
HexCer(d16:1/20:0)		-0.0290127	-0.062 to 0.004	0.0876396	0.404381	-0.0300791	-0.063 to 0.005	-0.18558	-0.263 to -0.108	3.49955e-06	2.19004e-05	-0.188721	-0.267 to -0.102
HexCer(d16:1/22:0)		-0.020555	-0.054 to 0.013	0.234541	0.610752	-0.0197481	-0.057 to 0.012	-0.173625	-0.253 to -0.094	2.29486e-05	0.000108586	-0.173133	-0.25 to -0.089
HexCer(d16:1/24:0)		-0.0380669	-0.072 to -0.004	0.0285663	0.240951	-0.0380184	-0.072 to -0.009	-0.181976	-0.262 to -0.102	9.87512e-06	5.17776e-05	-0.183973	-0.264 to -0.103
HexCer(d18:1/16:0)		0.0293696	-0.006 to 0.065	0.105847	0.441882	0.0291274	-0.005 to 0.071	0.192187	0.108 to 0.276	9.00934e-06	4.82155e-05	0.190732	0.1 to 0.291
HexCer(d18:1/18:0)		-0.00806283	-0.043 to 0.026	0.646784	0.87212	-0.00871532	-0.046 to 0.028	-0.0409544	-0.123 to 0.041	0.329541	0.431238	-0.0408371	-0.128 to 0.042
HexCer(d18:1/20:0)		-0.00988929	-0.043 to 0.024	0.562774	0.821721	-0.0102077	-0.042 to 0.023	-0.115417	-0.194 to -0.037	0.00432518	0.0105878	-0.116377	-0.205 to -0.039
HexCer(d18:1/22:0)		-0.00465271	-0.04 to 0.03	0.794687	0.933658	-0.00357799	-0.04 to 0.032	-0.035016	-0.118 to 0.048	0.411218	0.518765	-0.0327531	-0.128 to 0.061
HexCer(d18:1/24:0)		-0.00834761	-0.043 to 0.026	0.635492	0.866682	-0.00709296	-0.042 to 0.024	-0.0140613	-0.097 to 0.069	0.739718	0.814215	-0.0171399	-0.103 to 0.088
HexCer(d18:1/24:1)		0.0288046	-0.005 to 0.063	0.0992315	0.430188	0.0292716	-0.007 to 0.064	0.13414	0.053 to 0.215	0.00130232	0.00364837	0.131674	0.052 to 0.227
HexCer(d18:2/18:0)		-0.0183305	-0.055 to 0.018	0.325132	0.695049	-0.0181436	-0.052 to 0.018	-0.181781	-0.268 to -0.096	4.06612e-05	0.000172421	-0.184682	-0.283 to -0.094
HexCer(d18:2/20:0)		-0.0188554	-0.057 to 0.019	0.328965	0.698074	-0.0179411	-0.058 to 0.018	-0.0588911	-0.149 to 0.032	0.202941	0.291664	-0.0612611	-0.135 to 0.034
HexCer(d18:2/22:0)		-0.0404803	-0.076 to -0.005	0.024211	0.225639	-0.0407014	-0.074 to -0.002	-0.179548	-0.262 to -0.097	2.45122e-05	0.000113901	-0.183251	-0.268 to -0.077
HexCer(d18:2/24:0)		-0.0251798	-0.06 to 0.009	0.154891	0.520328	-0.0249023	-0.064 to 0.006	-0.168641	-0.25 to -0.087	5.79495e-05	0.00023793	-0.169834	-0.256 to -0.075
Hex2Cer(d16:1/16:0)		0.00604545	-0.03 to 0.042	0.742209	0.909205	0.00548211	-0.031 to 0.047	0.23924	0.156 to 0.323	3.60698e-08	4.05654e-07	0.240427	0.15 to 0.32
Hex2Cer(d16:1/24:1)		-0.00119219	-0.037 to 0.035	0.948673	0.976354	-0.000531887	-0.043 to 0.035	-0.00173764	-0.089 to 0.085	0.968814	0.980182	-0.000962894	-0.097 to 0.089
Hex2Cer(d18:1/16:0)		0.0537755	0.014 to 0.093	0.00762081	0.150871	0.0543185	0.01 to 0.094	0.392249	0.304 to 0.48	4.69513e-17	1.82171e-14	0.391005	0.297 to 0.5
Hex2Cer(d18:1/18:0)		-0.00266135	-0.04 to 0.035	0.89013	0.965845	-0.00255106	-0.038 to 0.032	-0.127935	-0.217 to -0.039	0.00502197	0.0120279	-0.129059	-0.213 to -0.032
Hex2Cer(d18:1/20:0)		-0.00481562	-0.043 to 0.033	0.803024	0.933658	-0.00459528	-0.043 to 0.033	0.180438	0.092 to 0.269	7.8139e-05	0.000310953	0.179121	0.096 to 0.276
Hex2Cer(d18:1/22:0)		0.0101156	-0.027 to 0.047	0.593593	0.842631	0.011253	-0.027 to 0.045	0.214943	0.129 to 0.301	1.50796e-06	1.0448e-05	0.215117	0.125 to 0.29
Hex2Cer(d18:1/24:0)		0.00466171	-0.032 to 0.042	0.804589	0.933658	0.00504827	-0.028 to 0.039	0.0979531	0.01 to 0.186	0.0299019	0.0560481	0.0980179	0.004 to 0.185
Hex2Cer(d18:1/24:1)		0.0412077	0.003 to 0.079	0.0329043	0.252809	0.0408248	0.007 to 0.082	0.25817	0.17 to 0.346	1.46709e-08	2.13941e-07	0.257524	0.173 to 0.345
Hex2Cer(d18:2/16:0)		0.0378475	0 to 0.076	0.0494616	0.283412	0.0372661	-0.002 to 0.078	0.31984	0.234 to 0.406	1.55958e-12	1.3447e-10	0.319821	0.23 to 0.407
Hex2Cer(d18:2/24:1)		0.0184284	-0.018 to 0.055	0.324841	0.695049	0.0183044	-0.019 to 0.061	0.0202488	-0.067 to 0.108	0.650464	0.729422	0.0191651	-0.075 to 0.109
Hex3Cer(d18:1/16:0)		-0.0173001	-0.055 to 0.021	0.372698	0.729493	-0.0173278	-0.055 to 0.025	-0.15057	-0.24 to -0.061	0.00109465	0.00310017	-0.148066	-0.243 to -0.056
Hex3Cer(d18:1/18:0)		-0.0470675	-0.082 to -0.013	0.00783158	0.150871	-0.04652	-0.08 to -0.005	-0.138737	-0.221 to -0.056	0.00102287	0.00292731	-0.141094	-0.223 to -0.049
Hex3Cer(d18:1/20:0)		-0.0521311	-0.088 to -0.016	0.0046935	0.150871	-0.0529154	-0.086 to -0.021	-0.0798128	-0.166 to 0.007	0.0716937	0.119387	-0.0818862	-0.174 to 0.005
Hex3Cer(d18:1/22:0)		-0.0470405	-0.083 to -0.011	0.0115627	0.169296	-0.0471901	-0.083 to -0.012	-0.143693	-0.23 to -0.058	0.00116559	0.00328908	-0.145972	-0.24 to -0.043
Hex3Cer(d18:1/24:0)		-0.0419703	-0.078 to -0.006	0.0244248	0.225639	-0.0419148	-0.081 to -0.003	-0.110266	-0.198 to -0.023	0.0138369	0.0294176	-0.109991	-0.197 to -0.015
Hex3Cer(d18:1/24:1)		-0.0257413	-0.063 to 0.011	0.17513	0.548315	-0.0259404	-0.063 to 0.011	-0.0914272	-0.181 to -0.002	0.0451334	0.0806994	-0.0917804	-0.179 to 0.01
GM3(d18:1/16:0)		0.0325857	-0.005 to 0.07	0.0882611	0.404381	0.0324036	-0.007 to 0.072	0.283582	0.197 to 0.37	2.91434e-10	6.91258e-09	0.280468	0.187 to 0.411
GM3(d18:1/18:0)		-0.0422647	-0.08 to -0.004	0.0290867	0.242431	-0.042922	-0.078 to 0	-0.14459	-0.235 to -0.055	0.00174069	0.00475624	-0.144837	-0.238 to -0.056
GM3(d18:1/20:0)		0.0201851	-0.015 to 0.055	0.261604	0.646511	0.0199811	-0.017 to 0.058	0.149169	0.065 to 0.233	0.000531866	0.00173415	0.148284	0.061 to 0.237
GM3(d18:1/22:0)		0.0111337	-0.027 to 0.05	0.571691	0.825022	0.0111201	-0.026 to 0.051	0.146488	0.055 to 0.238	0.00182209	0.00492662	0.143636	0.049 to 0.25
GM3(d18:1/24:0)		0.0165139	-0.022 to 0.055	0.40668	0.736447	0.0168926	-0.022 to 0.055	0.0923962	0 to 0.185	0.0516165	0.09001	0.0921224	0.004 to 0.193
GM3(d18:1/24:1)		0.00898564	-0.029 to 0.047	0.643184	0.871156	0.00917139	-0.025 to 0.043	0.163031	0.073 to 0.253	0.000436041	0.00145222	0.161639	0.07 to 0.275
GM1(d18:1/16:0)		0.0232624	-0.015 to 0.061	0.231898	0.610752	0.0224313	-0.016 to 0.064	0.0939535	0.003 to 0.185	0.0442951	0.0796357	0.0908748	-0.006 to 0.195
Sulfatide (d18:1:/16:0(OH))		-0.0340932	-0.072 to 0.004	0.080093	0.386038	-0.034814	-0.065 to 0.001	-0.0286657	-0.12 to 0.063	0.540818	0.640725	-0.0298357	-0.111 to 0.059
Sulfatide (d18:1:/16:0)		-0.0251629	-0.062 to 0.011	0.175775	0.548315	-0.0254133	-0.065 to 0.01	-0.0942982	-0.181 to -0.007	0.0340755	0.0622178	-0.0931378	-0.184 to -0.012
Sulfatide (d18:1:/24:0(OH))		-0.0159952	-0.052 to 0.02	0.389002	0.736447	-0.0151152	-0.057 to 0.016	-0.0961249	-0.183 to -0.009	0.0302092	0.0564877	-0.0946185	-0.199 to -0.018
Sulfatide (d18:1:/24:0)		-0.0319096	-0.069 to 0.005	0.093896	0.420927	-0.0323396	-0.072 to 0.005	-0.157628	-0.246 to -0.069	0.000546715	0.00176038	-0.155709	-0.259 to -0.072
Sulfatide (d18:1:/24:1(OH))		-0.00716941	-0.044 to 0.03	0.703511	0.889832	-0.00677748	-0.045 to 0.027	-0.0677016	-0.156 to 0.02	0.132584	0.20577	-0.0656883	-0.151 to 0.014
Sulfatide (d18:1:/24:1)		-0.0349893	-0.072 to 0.002	0.0627905	0.322685	-0.0358332	-0.071 to 0.004	-0.117134	-0.205 to -0.029	0.00910411	0.0204185	-0.120289	-0.214 to -0.027
SM(34:3)		-0.00893642	-0.048 to 0.03	0.655695	0.877274	-0.00930464	-0.05 to 0.031	-0.107901	-0.2 to -0.016	0.0219143	0.0430103	-0.10549	-0.211 to -0.024
SM(35:2) (b)		0.00166273	-0.038 to 0.042	0.93496	0.976354	0.00140871	-0.038 to 0.04	0.0290026	-0.066 to 0.124	0.551046	0.64888	0.0297387	-0.076 to 0.124
SM(37:1)		-0.00186043	-0.039 to 0.036	0.922422	0.976354	-0.00151666	-0.042 to 0.032	-0.0388949	-0.129 to 0.051	0.395424	0.503857	-0.0378385	-0.13 to 0.047
SM(37:2)		-0.00259463	-0.042 to 0.036	0.896093	0.965845	-0.00381665	-0.038 to 0.041	-0.0686002	-0.161 to 0.024	0.147582	0.225885	-0.0692242	-0.16 to 0.026
SM(38:3) (a)		0.00283862	-0.036 to 0.041	0.885229	0.962098	0.00293075	-0.033 to 0.042	0.0244717	-0.067 to 0.116	0.601324	0.693354	0.019365	-0.081 to 0.127
SM(38:3) (b)		0.017281	-0.022 to 0.057	0.394637	0.736447	0.0145497	-0.019 to 0.061	-0.0550451	-0.15 to 0.04	0.255725	0.352473	-0.0529867	-0.156 to 0.041
SM(40:3) (a)		0.000376934	-0.039 to 0.04	0.985051	0.993716	-0.000476981	-0.035 to 0.038	0.0897767	-0.004 to 0.184	0.0624715	0.107015	0.0837968	0.001 to 0.198
SM(40:3) (b)		0.00138977	-0.037 to 0.04	0.943767	0.976354	0.000362611	-0.036 to 0.041	0.00525232	-0.087 to 0.097	0.910975	0.936314	0.00760976	-0.079 to 0.092
SM(41:0)		-0.00967041	-0.044 to 0.025	0.583302	0.833596	-0.00905347	-0.046 to 0.02	-0.0273739	-0.11 to 0.055	0.517492	0.616856	-0.0255698	-0.113 to 0.057
SM(41:1) (a)		-0.00438283	-0.043 to 0.034	0.823674	0.941353	-0.00546768	-0.043 to 0.035	-0.0120119	-0.104 to 0.08	0.798479	0.858199	-0.0103106	-0.107 to 0.077
SM(43:1)		-0.00421094	-0.042 to 0.034	0.828219	0.942464	-0.0025482	-0.045 to 0.031	-0.0205823	-0.111 to 0.07	0.656848	0.735518	-0.0221166	-0.11 to 0.088
SM(43:2) (b)		0.0262686	-0.013 to 0.065	0.189621	0.554064	0.0257657	-0.011 to 0.068	0.143968	0.051 to 0.237	0.00255954	0.00657683	0.143238	0.045 to 0.242
SM(43:2) (c)		0.00441028	-0.035 to 0.043	0.824897	0.941353	0.00533528	-0.033 to 0.043	0.0210046	-0.072 to 0.114	0.659312	0.737213	0.0216258	-0.084 to 0.116
SM(44:1)		-0.00659353	-0.045 to 0.031	0.733837	0.905524	-0.00644476	-0.043 to 0.033	-0.00219964	-0.093 to 0.088	0.962069	0.975903	-0.00543009	-0.083 to 0.098
SM(44:2)		0.0236323	-0.013 to 0.061	0.211893	0.58993	0.0238855	-0.013 to 0.061	0.0837664	-0.005 to 0.172	0.0640068	0.108924	0.0801151	-0.006 to 0.183
SM(44:3)		0.0318336	-0.006 to 0.07	0.0983525	0.428773	0.0322614	-0.006 to 0.067	0.0664882	-0.024 to 0.157	0.148693	0.22659	0.0632453	-0.029 to 0.174
SM(d16:1/19:0)		-0.00999209	-0.049 to 0.029	0.613088	0.856135	-0.0111777	-0.044 to 0.034	-0.038614	-0.131 to 0.054	0.411803	0.518765	-0.0387219	-0.15 to 0.054
SM(d16:1/23:0)/SM(d17:1/22:0)		-0.0166951	-0.053 to 0.019	0.363879	0.724025	-0.0157857	-0.049 to 0.018	-0.0764901	-0.163 to 0.01	0.0829689	0.135831	-0.0773308	-0.162 to 0.003
SM(d16:1/24:1)		-0.0137052	-0.052 to 0.024	0.477836	0.77775	-0.0140463	-0.052 to 0.028	0.0537256	-0.037 to 0.145	0.247696	0.342624	0.0501386	-0.032 to 0.147
SM(d17:1/14:0)		-0.0133151	-0.05 to 0.023	0.47752	0.77775	-0.0150585	-0.049 to 0.026	-0.0973489	-0.185 to -0.01	0.0297566	0.0559931	-0.0969757	-0.186 to -0.017
SM(d17:1/16:0)		-0.0130828	-0.05 to 0.024	0.486612	0.778579	-0.0156346	-0.051 to 0.026	-0.0346243	-0.123 to 0.054	0.4428	0.548027	-0.0350558	-0.129 to 0.057
SM(d17:1/24:1)		0.0161968	-0.022 to 0.054	0.406377	0.736447	0.0148147	-0.021 to 0.056	0.0941274	0.003 to 0.186	0.0443333	0.0796357	0.0931132	0 to 0.193
SM(d18:0/14:0)		-0.00348332	-0.041 to 0.034	0.854343	0.953693	-0.0038472	-0.038 to 0.038	-0.0293083	-0.118 to 0.06	0.518657	0.617297	-0.0295264	-0.115 to 0.061
SM(d18:0/16:0)		0.00528912	-0.03 to 0.04	0.767942	0.923148	0.00484364	-0.03 to 0.044	0.0473991	-0.037 to 0.131	0.269523	0.366929	0.048306	-0.04 to 0.143
SM(d18:0/22:0)		-0.00140968	-0.034 to 0.032	0.933298	0.976354	-0.000935182	-0.035 to 0.03	0.0129937	-0.066 to 0.092	0.745889	0.818684	0.0109254	-0.061 to 0.106
SM(d18:1/14:0/SM(d16:1/16:0)		-0.0105436	-0.047 to 0.026	0.569091	0.825022	-0.0111511	-0.046 to 0.025	-0.0351372	-0.122 to 0.052	0.428109	0.534104	-0.0362672	-0.123 to 0.051
SM(d18:1/16:0)		-0.00263654	-0.043 to 0.038	0.898865	0.965845	-0.00207273	-0.04 to 0.038	0.0576238	-0.039 to 0.155	0.244635	0.339601	0.0560705	-0.044 to 0.165
SM(d18:1/17:0)/SM(d17:1/18:0)		-0.0169115	-0.055 to 0.021	0.381811	0.732001	-0.0176449	-0.056 to 0.025	-0.018197	-0.109 to 0.073	0.695211	0.772718	-0.0192885	-0.114 to 0.082
SM(d18:1/18:0/SM(d16:1/20:0)		-0.00970132	-0.047 to 0.028	0.613085	0.856135	-0.0101129	-0.043 to 0.027	0.042677	-0.047 to 0.133	0.3532	0.458333	0.0418132	-0.049 to 0.132
SM(d18:1/20:0)/SM(d16:1/22:0)		-0.00420345	-0.041 to 0.033	0.824234	0.941353	-0.00441814	-0.039 to 0.031	-0.0197614	-0.109 to 0.069	0.662959	0.739162	-0.0199161	-0.11 to 0.061
SM(d18:1/22:0)/SM(d16:1/24:0)		0.00458166	-0.035 to 0.044	0.818711	0.939034	0.00570776	-0.032 to 0.039	0.102041	0.009 to 0.195	0.0323061	0.0596893	0.0990551	0.008 to 0.195
SM(d18:1/23:0)/SM(d17:1/24:0)		-0.00578352	-0.044 to 0.033	0.769687	0.923148	-0.00621904	-0.037 to 0.032	0.0409904	-0.052 to 0.134	0.38607	0.493558	0.0403384	-0.05 to 0.143
SM(d18:1/24:0)		0.0141868	-0.024 to 0.052	0.462878	0.771734	0.01348	-0.019 to 0.055	0.0659373	-0.024 to 0.156	0.152337	0.230886	0.0620147	-0.024 to 0.169
SM(d18:1/24:1)		0.0321237	-0.006 to 0.07	0.100688	0.434077	0.0332689	-0.003 to 0.069	0.260256	0.171 to 0.349	1.71708e-08	2.2584e-07	0.258487	0.169 to 0.352
SM(d18:2/14:0)		-0.00138445	-0.038 to 0.035	0.941043	0.976354	-0.00367989	-0.036 to 0.038	-0.175755	-0.262 to -0.09	6.91459e-05	0.000276584	-0.178865	-0.255 to -0.085
SM(d18:2/16:0)		-0.0101241	-0.047 to 0.027	0.593685	0.842631	-0.0106281	-0.048 to 0.027	-0.102131	-0.191 to -0.014	0.0242035	0.0469547	-0.106076	-0.19 to -0.007
SM(d18:2/17:0)		-0.0100773	-0.048 to 0.028	0.603974	0.854068	-0.0125332	-0.047 to 0.031	-0.0830233	-0.174 to 0.008	0.0734147	0.12173	-0.0802587	-0.179 to 0.003
SM(d18:2/18:0)		-0.0240993	-0.062 to 0.013	0.208961	0.589649	-0.0248047	-0.058 to 0.014	-0.0573758	-0.147 to 0.032	0.210651	0.300488	-0.0571149	-0.146 to 0.043
SM(d18:2/18:1)		-0.0115043	-0.051 to 0.028	0.571987	0.825022	-0.0116542	-0.052 to 0.028	-0.0543265	-0.15 to 0.041	0.265534	0.364054	-0.0526128	-0.145 to 0.045
SM(d18:2/20:0)		0.00920855	-0.029 to 0.048	0.63886	0.868377	0.00909313	-0.028 to 0.05	-0.0521449	-0.144 to 0.04	0.266056	0.364126	-0.0541645	-0.152 to 0.033
SM(d18:2/22:0)		0.0153658	-0.023 to 0.054	0.434061	0.752532	0.0157886	-0.019 to 0.054	0.0215906	-0.07 to 0.113	0.643002	0.724194	0.0210744	-0.075 to 0.119
SM(d18:2/23:0)		-0.0127896	-0.051 to 0.025	0.510633	0.791142	-0.0136013	-0.051 to 0.022	-0.0618985	-0.153 to 0.029	0.183048	0.270563	-0.0642052	-0.15 to 0.033
SM(d18:2/24:0)		0.000295431	-0.037 to 0.038	0.987729	0.994134	0.00125911	-0.033 to 0.037	-0.032053	-0.122 to 0.057	0.483271	0.584141	-0.0360638	-0.122 to 0.068
SM(d19:1/24:1)		0.0156125	-0.022 to 0.053	0.416722	0.738303	0.013629	-0.02 to 0.053	0.0561246	-0.033 to 0.146	0.219813	0.311056	0.056107	-0.041 to 0.15
PA(34:1)		-0.00509554	-0.031 to 0.021	0.705147	0.889832	-0.0043928	-0.037 to 0.02	-0.0748704	-0.138 to -0.012	0.0208551	0.0413902	-0.0763481	-0.156 to -0.002
PA(36:1)		0.00130578	-0.03 to 0.032	0.934494	0.976354	0.000356053	-0.033 to 0.032	-0.0737874	-0.148 to 0.001	0.0534168	0.0929405	-0.075757	-0.177 to 0.011
PA(36:2)		0.00414666	-0.021 to 0.029	0.744758	0.91013	0.00455643	-0.023 to 0.028	-0.0418046	-0.102 to 0.018	0.17098	0.255155	-0.0433716	-0.116 to 0.021
PA(36:3)		0.0157606	-0.008 to 0.039	0.189125	0.554064	0.0159759	-0.012 to 0.04	-0.066704	-0.123 to -0.01	0.0204577	0.0407055	-0.0699631	-0.129 to 0.003
PA(36:4)		0.00669522	-0.021 to 0.034	0.633328	0.865251	0.00730686	-0.024 to 0.03	-0.0354372	-0.101 to 0.03	0.292642	0.392212	-0.0351207	-0.133 to 0.035
PA(40:6)		0.00566603	-0.029 to 0.041	0.750718	0.91597	0.00559197	-0.028 to 0.039	0.0164586	-0.068 to 0.101	0.701763	0.777954	0.0174475	-0.079 to 0.103
PC(14:0_16:0)		-0.010011	-0.048 to 0.028	0.608652	0.856135	-0.0116368	-0.045 to 0.032	-0.0284577	-0.12 to 0.063	0.542866	0.64138	-0.0292435	-0.12 to 0.057
PC(14:0_20:4)		0.0179893	-0.019 to 0.055	0.346225	0.715952	0.0158731	-0.02 to 0.059	-0.0360475	-0.126 to 0.053	0.43049	0.536213	-0.0380554	-0.118 to 0.057
PC(14:0_22:6)		-0.0123955	-0.05 to 0.025	0.513564	0.791142	-0.0131432	-0.048 to 0.02	-0.0254573	-0.114 to 0.064	0.575317	0.671158	-0.0262453	-0.105 to 0.055
PC(15-MHDA_18:1)		0.0197546	-0.018 to 0.057	0.304752	0.680931	0.0180962	-0.017 to 0.057	-0.0374827	-0.127 to 0.052	0.414264	0.520176	-0.0392357	-0.135 to 0.055
PC(15-MHDA_18:2)		0.0226436	-0.014 to 0.06	0.229434	0.610752	0.0217376	-0.013 to 0.061	-0.031267	-0.12 to 0.057	0.487879	0.588462	-0.0304451	-0.117 to 0.063
PC(15-MHDA_20:4)		0.023365	-0.013 to 0.06	0.212101	0.58993	0.0218697	-0.009 to 0.063	-0.0290499	-0.116 to 0.058	0.513002	0.612446	-0.0302863	-0.11 to 0.063
PC(15-MHDA_22:6)		-0.0155301	-0.05 to 0.019	0.381077	0.732001	-0.0164063	-0.052 to 0.016	-0.0836325	-0.166 to -0.001	0.047906	0.0848745	-0.0808058	-0.171 to -0.009
PC(15:0_20:3)		0.03815	0 to 0.076	0.0483683	0.283412	0.0356022	0.002 to 0.076	-0.00425549	-0.095 to 0.087	0.927125	0.949142	-0.00244208	-0.107 to 0.086
PC(15:0_20:4)		0.0178494	-0.017 to 0.053	0.322043	0.692259	0.0158317	-0.017 to 0.057	-0.0551995	-0.139 to 0.029	0.197154	0.285456	-0.0535493	-0.146 to 0.032
PC(15:0_22:6)		-0.016838	-0.051 to 0.017	0.331382	0.700688	-0.0169814	-0.05 to 0.016	-0.0679618	-0.149 to 0.013	0.101338	0.162141	-0.0689625	-0.149 to 0.011
PC(16:0_16:0)		0.00879022	-0.031 to 0.049	0.666354	0.880051	0.009421	-0.031 to 0.05	0.0367471	-0.059 to 0.133	0.454629	0.559987	0.0338155	-0.058 to 0.148
PC(16:0_18:0)		0.0064947	-0.031 to 0.044	0.734144	0.905524	0.0069325	-0.031 to 0.041	0.0978363	0.008 to 0.187	0.032385	0.059693	0.0985691	0.002 to 0.189
PC(16:0_18:1)		0.0199129	-0.018 to 0.058	0.305366	0.680931	0.0181717	-0.022 to 0.055	0.013978	-0.078 to 0.106	0.765258	0.831708	0.00852728	-0.085 to 0.118
PC(16:0_18:2)		0.0325747	-0.009 to 0.074	0.121693	0.476185	0.0327877	-0.006 to 0.073	0.0558822	-0.043 to 0.155	0.270073	0.367034	0.0586963	-0.047 to 0.148
PC(16:0_18:3) (a)		0.0308719	-0.008 to 0.069	0.116804	0.466452	0.029236	-0.006 to 0.072	-0.0141097	-0.107 to 0.079	0.766559	0.831958	-0.015508	-0.112 to 0.07
PC(16:0_18:3) (b)		0.0417897	0.006 to 0.078	0.0239082	0.225639	0.04097	0.007 to 0.077	0.0700924	-0.017 to 0.157	0.115958	0.182894	0.0689561	-0.025 to 0.166
PC(16:0_20:3) (a)		0.0465399	0.008 to 0.085	0.0173265	0.197725	0.0462474	0.012 to 0.083	0.0995396	0.008 to 0.191	0.0335835	0.0616095	0.0994146	-0.004 to 0.191
PC(16:0_20:3) (b)		0.0535998	0.015 to 0.092	0.00619673	0.150871	0.0509809	0.015 to 0.095	0.117435	0.026 to 0.209	0.0124752	0.0269659	0.116048	0.018 to 0.217
PC(16:0_20:4)		0.033313	0 to 0.066	0.0490578	0.283412	0.0319446	0.001 to 0.066	0.0431978	-0.036 to 0.122	0.284441	0.383872	0.0443388	-0.042 to 0.118
PC(16:0_20:5)		0.0152215	-0.021 to 0.052	0.413244	0.736447	0.0140653	-0.021 to 0.055	-0.022805	-0.11 to 0.065	0.609357	0.699499	-0.0246136	-0.107 to 0.063
PC(16:0_22:6)		-0.0136217	-0.048 to 0.021	0.4369	0.752532	-0.0123016	-0.044 to 0.016	-0.0398375	-0.122 to 0.042	0.341754	0.446467	-0.0390525	-0.117 to 0.038
PC(16:1_18:2)		0.0158133	-0.023 to 0.055	0.426586	0.750636	0.015958	-0.023 to 0.052	-0.0860714	-0.179 to 0.007	0.0703722	0.117438	-0.0847566	-0.18 to -0.007
PC(16:1_20:4)		0.0302271	-0.006 to 0.067	0.106517	0.441882	0.0300127	-0.004 to 0.069	-0.0464438	-0.134 to 0.041	0.300468	0.39857	-0.0462916	-0.137 to 0.041
PC(16:1_22:6)		-0.00782744	-0.043 to 0.028	0.666977	0.880051	-0.00799219	-0.042 to 0.026	-0.0808214	-0.166 to 0.004	0.0632534	0.107878	-0.0796222	-0.17 to -0.003
PC(17:0_18:1)		0.0215704	-0.017 to 0.06	0.268799	0.65388	0.0206783	-0.013 to 0.058	-0.0203735	-0.112 to 0.071	0.662884	0.739162	-0.0204705	-0.115 to 0.073
PC(17:0_18:2)		0.0153622	-0.021 to 0.051	0.403144	0.736447	0.0144005	-0.015 to 0.049	0.00518445	-0.081 to 0.092	0.906342	0.934026	0.00501373	-0.085 to 0.091
PC(17:0_20:4)		0.0303935	-0.004 to 0.065	0.0873855	0.404381	0.0291029	-0.004 to 0.065	-0.0164978	-0.099 to 0.066	0.696043	0.772718	-0.015734	-0.107 to 0.062
PC(17:0_22:6)		-0.0177898	-0.05 to 0.015	0.285311	0.661487	-0.0180081	-0.044 to 0.014	-0.0181207	-0.096 to 0.06	0.650102	0.729422	-0.0182044	-0.089 to 0.058
PC(17:1_18:2)		0.0418617	0.003 to 0.081	0.034608	0.258229	0.0416745	0.004 to 0.081	-0.0497753	-0.143 to 0.044	0.296914	0.395206	-0.0483086	-0.152 to 0.047
PC(18:0_18:1)		0.026402	-0.012 to 0.065	0.181007	0.548678	0.0257002	-0.011 to 0.067	0.0544631	-0.038 to 0.147	0.250517	0.345909	0.0521945	-0.047 to 0.16
PC(18:0_18:2)		0.0306761	-0.01 to 0.071	0.139166	0.488656	0.0317546	-0.002 to 0.063	0.1085	0.011 to 0.206	0.0289737	0.0547046	0.106766	0.013 to 0.195
PC(18:0_20:3)		0.0583488	0.021 to 0.096	0.00245683	0.12733	0.0575877	0.022 to 0.094	0.157722	0.068 to 0.248	0.000656935	0.002031	0.158252	0.071 to 0.254
PC(18:0_20:4)		0.0265392	-0.008 to 0.061	0.131769	0.485581	0.0271131	-0.004 to 0.056	0.0466348	-0.036 to 0.129	0.267974	0.365462	0.0476623	-0.039 to 0.128
PC(18:0_22:4)		0.0580313	0.021 to 0.095	0.00214451	0.12733	0.0582124	0.015 to 0.093	0.128814	0.04 to 0.217	0.00457948	0.0111401	0.125884	0.04 to 0.216
PC(18:0_22:5) (n3)		0.0202593	-0.017 to 0.057	0.283141	0.661453	0.0186527	-0.013 to 0.058	-0.00309639	-0.092 to 0.086	0.945506	0.962877	-0.00524245	-0.09 to 0.088
PC(18:0_22:5) (n6)		0.0380083	0.002 to 0.074	0.0405526	0.268964	0.0384215	0.002 to 0.073	0.110954	0.024 to 0.198	0.0128522	0.0276269	0.109878	0.022 to 0.197
PC(18:0_22:6)		-0.0099572	-0.044 to 0.024	0.563345	0.821721	-0.00920074	-0.04 to 0.021	0.0806138	0 to 0.161	0.0498127	0.0876523	0.0817934	-0.014 to 0.159
PC(18:1_18:1)		0.0435645	0.003 to 0.084	0.0356764	0.263665	0.0437742	0.006 to 0.081	0.0103167	-0.088 to 0.108	0.836602	0.8821	0.00856255	-0.1 to 0.119
PC(18:1_18:2)		0.0236517	-0.017 to 0.065	0.257448	0.644452	0.0236458	-0.013 to 0.062	-0.0284484	-0.127 to 0.07	0.57091	0.667208	-0.0273094	-0.127 to 0.076
PC(18:1_20:3)		0.0551455	0.017 to 0.093	0.00453254	0.150871	0.0552008	0.018 to 0.092	0.0371829	-0.055 to 0.129	0.42712	0.533728	0.0388717	-0.063 to 0.125
PC(18:1_22:6) (a)		-0.00883075	-0.046 to 0.029	0.644386	0.871156	-0.0066916	-0.045 to 0.026	0.0114152	-0.078 to 0.101	0.80319	0.860877	0.0129635	-0.09 to 0.098
PC(18:1_22:6) (b)		0.00242134	-0.034 to 0.039	0.897107	0.965845	0.00132823	-0.028 to 0.04	0.0315469	-0.056 to 0.119	0.480309	0.581968	0.0320804	-0.064 to 0.122
PC(18:2_18:2)		0.0271459	-0.013 to 0.068	0.190666	0.554147	0.0291111	-0.016 to 0.061	0.0031401	-0.095 to 0.101	0.949832	0.964751	0.00507554	-0.1 to 0.095
PC(18:2_20:5)		0.0196813	-0.019 to 0.058	0.316831	0.689322	0.0193987	-0.017 to 0.057	-0.0664841	-0.159 to 0.026	0.159117	0.239292	-0.0644687	-0.16 to 0.025
PC(20:0_20:4)		0.0319825	-0.007 to 0.071	0.109913	0.447282	0.0324834	-0.004 to 0.067	0.0252956	-0.069 to 0.12	0.599131	0.691854	0.0237603	-0.054 to 0.118
PC(28:0)		-0.00864043	-0.046 to 0.029	0.651077	0.872601	-0.0104348	-0.043 to 0.029	-0.00942669	-0.099 to 0.08	0.836631	0.8821	-0.0100986	-0.095 to 0.078
PC(31:0) (a)		0.00509095	-0.033 to 0.043	0.793339	0.933658	0.00303303	-0.032 to 0.048	-0.035487	-0.126 to 0.055	0.443536	0.548064	-0.0361597	-0.123 to 0.057
PC(31:0) (b)		0.00286773	-0.036 to 0.041	0.883857	0.962098	-0.000127571	-0.031 to 0.046	-0.0427308	-0.134 to 0.049	0.3608	0.467413	-0.0463531	-0.134 to 0.043
PC(32:1)		0.0116833	-0.025 to 0.048	0.528435	0.793336	0.0108309	-0.026 to 0.049	-0.0118899	-0.099 to 0.075	0.789828	0.852443	-0.0132778	-0.1 to 0.078
PC(32:2)		0.00551611	-0.033 to 0.044	0.777824	0.927176	0.00487332	-0.03 to 0.044	-0.0579698	-0.15 to 0.034	0.216077	0.306537	-0.0594999	-0.136 to 0.031
PC(33:0) (a)		0.00935922	-0.029 to 0.047	0.628708	0.864242	0.00746118	-0.026 to 0.052	-0.0431104	-0.133 to 0.047	0.349148	0.453834	-0.0449331	-0.133 to 0.056
PC(33:0) (b)		0.00853213	-0.03 to 0.047	0.66737	0.880051	0.0077438	-0.032 to 0.051	-0.0199933	-0.113 to 0.073	0.672838	0.749099	-0.0200896	-0.12 to 0.078
PC(33:1)		0.0156676	-0.022 to 0.053	0.411764	0.736447	0.0135266	-0.022 to 0.054	-0.0263896	-0.116 to 0.063	0.563927	0.661039	-0.0242969	-0.109 to 0.072
PC(33:2)		0.0162476	-0.021 to 0.054	0.399132	0.736447	0.0160293	-0.022 to 0.053	-0.0548473	-0.145 to 0.035	0.234352	0.329067	-0.0555222	-0.15 to 0.032
PC(34:5)		0.0184576	-0.02 to 0.057	0.343021	0.713656	0.0170762	-0.021 to 0.053	-0.0306666	-0.122 to 0.061	0.511679	0.611808	-0.0310756	-0.117 to 0.057
PC(35:5)		0.0123512	-0.025 to 0.05	0.516827	0.791142	0.01067	-0.021 to 0.052	-0.0476212	-0.137 to 0.041	0.295255	0.393831	-0.0463341	-0.14 to 0.036
PC(36:6) (a)		0.021964	-0.016 to 0.06	0.25505	0.642592	0.0210631	-0.014 to 0.061	-0.0504988	-0.141 to 0.04	0.2757	0.374027	-0.0514464	-0.139 to 0.039
PC(38:2)		0.0484316	0.008 to 0.089	0.01892	0.206658	0.0490903	0.009 to 0.087	0.15442	0.058 to 0.251	0.00178973	0.00487309	0.15418	0.043 to 0.25
PC(38:4) (b)		0.0514601	0.014 to 0.089	0.00757195	0.150871	0.0500296	0.014 to 0.088	0.048197	-0.043 to 0.139	0.298982	0.397277	0.049574	-0.038 to 0.143
PC(38:5) (a)		0.0167597	-0.019 to 0.053	0.361631	0.721876	0.0161366	-0.018 to 0.051	-0.130562	-0.215 to -0.046	0.00259669	0.00660667	-0.128944	-0.214 to -0.049
PC(38:5) (b)		0.0219201	-0.015 to 0.059	0.244197	0.625403	0.0206095	-0.015 to 0.06	0.0102064	-0.078 to 0.099	0.821029	0.87267	0.0116847	-0.085 to 0.092
PC(38:6) (a)		0.0208041	-0.017 to 0.059	0.285564	0.661487	0.0186407	-0.012 to 0.06	-0.0660321	-0.157 to 0.025	0.15727	0.237897	-0.0656364	-0.153 to 0.023
PC(38:7)(c)		-0.0225964	-0.057 to 0.012	0.195391	0.561569	-0.0234013	-0.052 to 0.009	-0.0873887	-0.169 to -0.006	0.0363672	0.0660913	-0.0861424	-0.166 to -0.011
PC(39:5)(a)		-0.0199932	-0.056 to 0.016	0.271884	0.657265	-0.0196455	-0.055 to 0.015	-0.107918	-0.193 to -0.023	0.0132509	0.0284052	-0.108139	-0.193 to -0.026
PC(39:5)(b)		0.0147638	-0.022 to 0.051	0.426054	0.750636	0.0138297	-0.021 to 0.053	-0.0987695	-0.185 to -0.013	0.0249413	0.0481453	-0.0989209	-0.193 to -0.013
PC(40:10)		0.00739829	-0.024 to 0.039	0.643759	0.871156	0.00803623	-0.023 to 0.038	0.0487511	-0.026 to 0.124	0.20358	0.292011	0.0477874	-0.036 to 0.126
PC(40:7) (a)		0.0231443	-0.014 to 0.061	0.227741	0.610752	0.0222693	-0.012 to 0.06	-0.107188	-0.197 to -0.017	0.0196176	0.0391884	-0.106467	-0.203 to -0.026
PC(40:8)		-0.00118179	-0.037 to 0.034	0.948005	0.976354	-0.00122706	-0.033 to 0.03	-0.072313	-0.157 to 0.012	0.0947568	0.15319	-0.0692731	-0.156 to 0.007
PC(44:12)		-0.0289825	-0.062 to 0.004	0.0885886	0.404381	-0.0280357	-0.059 to 0	-0.0895515	-0.169 to -0.01	0.0279042	0.0530021	-0.0873183	-0.175 to -0.021
PC(O-16:0/16:0)		0.0333367	-0.005 to 0.072	0.0911419	0.411199	0.0335938	-0.005 to 0.07	0.025157	-0.067 to 0.118	0.593934	0.686875	0.0225469	-0.069 to 0.138
PC(O-16:0/20:3)		0.0374223	0.001 to 0.074	0.046231	0.283412	0.0369147	0.002 to 0.072	-0.0105055	-0.099 to 0.078	0.815649	0.869428	-0.00929749	-0.117 to 0.077
PC(O-16:0/20:4)		0.00719967	-0.03 to 0.045	0.707005	0.889832	0.00785805	-0.032 to 0.043	0.00759022	-0.082 to 0.097	0.868125	0.904249	0.00742759	-0.086 to 0.098
PC(O-16:0/22:6)		-0.0067224	-0.039 to 0.026	0.685438	0.8865	-0.00576803	-0.04 to 0.023	0.0473518	-0.031 to 0.125	0.234927	0.329067	0.0467074	-0.03 to 0.132
PC(O-18:0/18:1)		0.015564	-0.022 to 0.053	0.412861	0.736447	0.0138484	-0.023 to 0.053	-0.050757	-0.14 to 0.038	0.264373	0.363104	-0.0510876	-0.138 to 0.048
PC(O-18:0/18:2)		0.0200469	-0.018 to 0.058	0.301116	0.677292	0.0190245	-0.014 to 0.051	-0.0781886	-0.169 to 0.013	0.0931436	0.150897	-0.0803491	-0.171 to 0.026
PC(O-18:0/20:4)		0.0133721	-0.023 to 0.05	0.473158	0.77775	0.0127736	-0.027 to 0.053	0.00921438	-0.078 to 0.096	0.835702	0.8821	0.00942649	-0.084 to 0.103
PC(O-18:0/22:6)		-0.0113972	-0.043 to 0.02	0.483087	0.77775	-0.0105593	-0.044 to 0.018	0.0257845	-0.051 to 0.102	0.50876	0.610198	0.0267468	-0.06 to 0.105
PC(O-18:1/18:1)		0.033366	-0.006 to 0.073	0.0955774	0.420927	0.0326439	-0.003 to 0.072	-0.106339	-0.2 to -0.013	0.026637	0.0510378	-0.106992	-0.215 to -0.009
PC(O-18:1/18:2)		0.035753	-0.003 to 0.075	0.0729822	0.358444	0.0361712	-0.004 to 0.071	-0.0949823	-0.189 to -0.001	0.0472635	0.0841203	-0.092593	-0.191 to 0.004
PC(O-32:1)		0.00456417	-0.03 to 0.039	0.797066	0.933658	0.00443611	-0.03 to 0.039	-0.143496	-0.226 to -0.061	0.000678416	0.00208083	-0.143051	-0.216 to -0.059
PC(O-32:2)		0.0160305	-0.021 to 0.053	0.394795	0.736447	0.0151795	-0.017 to 0.054	-0.139548	-0.227 to -0.052	0.0018539	0.00499522	-0.140414	-0.236 to -0.053
PC(O-34:1)		0.0380464	0.003 to 0.073	0.0340191	0.256299	0.0376223	0.003 to 0.071	-0.0563312	-0.14 to 0.028	0.18919	0.276907	-0.060018	-0.15 to 0.043
PC(O-34:2)		0.025344	-0.013 to 0.064	0.199063	0.570012	0.0262863	-0.015 to 0.064	-0.103069	-0.196 to -0.01	0.0298004	0.0559931	-0.101264	-0.202 to -0.018
PC(O-34:4)		0.0218669	-0.016 to 0.06	0.261412	0.646511	0.0207384	-0.015 to 0.062	-0.100698	-0.192 to -0.01	0.0303691	0.0566501	-0.100353	-0.192 to -0.009
PC(O-35:4)		0.015852	-0.021 to 0.053	0.397873	0.736447	0.0145657	-0.02 to 0.055	-0.109492	-0.197 to -0.022	0.0143332	0.0303066	-0.110246	-0.207 to -0.02
PC(O-36:0)		0.0294444	-0.008 to 0.067	0.126734	0.483218	0.029455	-0.015 to 0.067	0.0521677	-0.039 to 0.143	0.260089	0.357853	0.0508858	-0.048 to 0.15
PC(O-36:5)		0.0190842	-0.018 to 0.057	0.318465	0.689322	0.0185232	-0.016 to 0.056	-0.0969788	-0.186 to -0.008	0.0338227	0.061902	-0.0972873	-0.192 to -0.01
PC(O-38:5)		0.036654	-0.002 to 0.075	0.0610538	0.320522	0.0363069	0.002 to 0.073	0.0443973	-0.047 to 0.136	0.34323	0.447641	0.0420047	-0.055 to 0.148
PC(O-40:5)		0.0471201	0.012 to 0.083	0.00937843	0.155477	0.0463987	0.008 to 0.082	0.0822797	-0.003 to 0.167	0.0578006	0.0996739	0.0824496	-0.015 to 0.181
PC(O-40:7) (a)		0.00464483	-0.029 to 0.039	0.788152	0.93157	0.00645851	-0.028 to 0.037	0.0781815	-0.003 to 0.159	0.0590261	0.101561	0.0797111	0.003 to 0.16
PC(O-40:7) (b)		0.0238827	-0.002 to 0.05	0.0721759	0.356742	0.0235398	0.001 to 0.049	-0.00601216	-0.068 to 0.056	0.848476	0.888553	-0.00448751	-0.081 to 0.096
PC(P-15:0/20:4) (a)		0.0121734	-0.025 to 0.049	0.52217	0.793237	0.0119415	-0.026 to 0.047	-0.0818109	-0.172 to 0.008	0.0745541	0.123094	-0.0816432	-0.169 to 0.015
PC(P-15:0/20:4) (b)		-0.000697949	-0.038 to 0.037	0.970959	0.985726	-0.00140753	-0.038 to 0.038	-0.165083	-0.254 to -0.076	0.000324367	0.00112874	-0.162208	-0.256 to -0.076
PC(P-16:0/14:0)		-0.0237876	-0.06 to 0.013	0.202283	0.577101	-0.0244589	-0.059 to 0.015	-0.245086	-0.329 to -0.162	1.66274e-08	2.2584e-07	-0.246653	-0.329 to -0.159
PC(P-16:0/16:0)		0.00023791	-0.036 to 0.036	0.989707	0.994835	-0.000930037	-0.034 to 0.034	-0.238645	-0.322 to -0.156	3.19988e-08	3.70613e-07	-0.239401	-0.322 to -0.136
PC(P-16:0/16:1)		-0.012598	-0.048 to 0.023	0.482861	0.77775	-0.0130358	-0.045 to 0.022	-0.270517	-0.351 to -0.19	1.20353e-10	3.59208e-09	-0.272136	-0.353 to -0.185
PC(P-16:0/18:0)		-0.00632316	-0.043 to 0.031	0.737112	0.906496	-0.0071744	-0.041 to 0.033	-0.111067	-0.199 to -0.023	0.0134276	0.0286258	-0.113671	-0.209 to -0.004
PC(P-16:0/18:1)		-0.0163234	-0.051 to 0.018	0.358711	0.721876	-0.0169005	-0.049 to 0.016	-0.230192	-0.311 to -0.15	3.54758e-08	4.04842e-07	-0.230224	-0.312 to -0.138
PC(P-16:0/18:2)		-0.003507	-0.042 to 0.035	0.856959	0.953693	-0.00378738	-0.039 to 0.031	-0.227205	-0.316 to -0.139	7.11762e-07	5.31084e-06	-0.224644	-0.324 to -0.146
PC(P-16:0/18:3)		0.0291611	-0.009 to 0.068	0.138973	0.488656	0.0273362	-0.008 to 0.07	-0.214024	-0.305 to -0.123	5.5301e-06	3.27066e-05	-0.211461	-0.311 to -0.129
PC(P-16:0/20:4)		-0.0122065	-0.047 to 0.023	0.496996	0.78388	-0.0123666	-0.048 to 0.021	-0.206808	-0.288 to -0.125	9.78427e-07	7.09588e-06	-0.207313	-0.296 to -0.108
PC(P-16:0/20:5)		-0.00450164	-0.041 to 0.032	0.80788	0.934567	-0.00525098	-0.043 to 0.029	-0.178394	-0.264 to -0.093	5.13723e-05	0.000213181	-0.176431	-0.268 to -0.098
PC(P-16:0/22:6)		-0.0332137	-0.065 to -0.001	0.0439472	0.275024	-0.0327423	-0.061 to -0.003	-0.156934	-0.233 to -0.081	6.14103e-05	0.0002495	-0.156442	-0.235 to -0.082
PC(P-17:0/20:4) (a)		-0.0212673	-0.055 to 0.012	0.210526	0.589776	-0.0219958	-0.052 to 0.018	-0.169348	-0.247 to -0.092	2.42459e-05	0.000113342	-0.167694	-0.252 to -0.092
PC(P-17:0/20:4) (b)		-0.0249725	-0.058 to 0.008	0.140515	0.488967	-0.0246838	-0.058 to 0.01	-0.17206	-0.25 to -0.094	1.74137e-05	8.49874e-05	-0.170086	-0.256 to -0.097
PC(P-18:0/18:2)		-0.0131631	-0.05 to 0.023	0.478187	0.77775	-0.0147339	-0.047 to 0.021	-0.159254	-0.245 to -0.074	0.000300935	0.00105668	-0.156392	-0.248 to -0.07
PC(P-18:0/20:4)		-0.0232208	-0.056 to 0.009	0.16196	0.533818	-0.02365	-0.053 to 0.01	-0.12654	-0.203 to -0.05	0.0013385	0.00373625	-0.126983	-0.208 to -0.042
PC(P-18:0/22:5)		-0.00490939	-0.037 to 0.028	0.766839	0.923148	-0.00489539	-0.036 to 0.028	-0.0658811	-0.143 to 0.011	0.0957666	0.15418	-0.0652498	-0.155 to 0.019
PC(P-18:0/22:6)		-0.0325997	-0.064 to -0.001	0.0405433	0.268964	-0.0320331	-0.062 to -0.003	-0.0500258	-0.125 to 0.025	0.189481	0.276907	-0.0485176	-0.126 to 0.029
PC(P-18:1/18:1)		0.0169991	-0.019 to 0.053	0.350418	0.720087	0.0164792	-0.016 to 0.055	-0.149353	-0.233 to -0.065	0.000550885	0.00176647	-0.151317	-0.243 to -0.064
PC(P-18:1/22:6)		-0.0173677	-0.05 to 0.016	0.302294	0.677977	-0.0174281	-0.05 to 0.012	-0.095004	-0.173 to -0.017	0.0177555	0.0363543	-0.09476	-0.175 to -0.012
PC(P-20:0/20:4)		-0.00571475	-0.039 to 0.027	0.734013	0.905524	-0.00670743	-0.04 to 0.028	-0.0352481	-0.114 to 0.043	0.380602	0.487371	-0.0356717	-0.117 to 0.06
PC(P-35:2)(a)		-0.0121417	-0.047 to 0.022	0.489346	0.778621	-0.0130605	-0.046 to 0.025	-0.155123	-0.236 to -0.074	0.00020891	0.000743642	-0.154602	-0.241 to -0.079
PC(P-35:2)(b)		-0.0117478	-0.048 to 0.025	0.527342	0.793336	-0.012989	-0.045 to 0.026	-0.150289	-0.237 to -0.064	0.000694616	0.00212213	-0.14803	-0.243 to -0.062
PC(P-36:3)		-0.0108498	-0.047 to 0.026	0.559396	0.820662	-0.0116275	-0.046 to 0.028	-0.238132	-0.323 to -0.154	5.39238e-08	5.73217e-07	-0.237705	-0.326 to -0.149
PC(P-38:5) (a)		-0.0234681	-0.057 to 0.011	0.176648	0.548315	-0.0234739	-0.053 to 0.009	-0.255006	-0.333 to -0.177	2.93963e-10	6.91258e-09	-0.25458	-0.336 to -0.168
PC(P-38:5) (b)		-0.0168676	-0.052 to 0.019	0.352059	0.720839	-0.0188742	-0.049 to 0.013	-0.178013	-0.261 to -0.095	3.16031e-05	0.000140137	-0.177405	-0.273 to -0.095
LPC(14:0) [sn1]		-0.0174297	-0.051 to 0.016	0.310688	0.68283	-0.0174038	-0.06 to 0.018	-0.0556218	-0.136 to 0.025	0.178077	0.265235	-0.057356	-0.133 to 0.023
LPC(14:0) [sn2]		-0.0197528	-0.053 to 0.014	0.251851	0.638681	-0.0190279	-0.057 to 0.016	-0.0627538	-0.144 to 0.018	0.129461	0.20173	-0.0625904	-0.145 to 0.018
LPC(15-MHDA) [sn1] [104_sn1]		0.00203465	-0.031 to 0.035	0.904671	0.969648	0.00211617	-0.033 to 0.039	-0.0569756	-0.136 to 0.022	0.158656	0.239063	-0.0556189	-0.141 to 0.022
LPC(15-MHDA) [sn1] / LPC(17:0) [sn2]		0.00304726	-0.029 to 0.035	0.850767	0.953693	0.0040937	-0.035 to 0.036	-0.0287178	-0.105 to 0.047	0.459513	0.565106	-0.0253775	-0.112 to 0.043
LPC(15-MHDA) [sn2]		0.00262557	-0.031 to 0.036	0.877256	0.962098	0.00264368	-0.034 to 0.038	-0.063246	-0.142 to 0.016	0.117592	0.185094	-0.0598089	-0.151 to 0.011
LPC(15:0) [sn1]		0.00313823	-0.029 to 0.036	0.850177	0.953693	0.00364763	-0.033 to 0.039	-0.0417655	-0.12 to 0.036	0.293842	0.39314	-0.0420971	-0.121 to 0.036
LPC(15:0) [sn2]		-0.00406939	-0.038 to 0.03	0.81495	0.93689	-0.00386468	-0.043 to 0.031	-0.0676389	-0.149 to 0.014	0.104019	0.166088	-0.0685931	-0.146 to 0.011
LPC(16:0) [sn1]		-0.0053259	-0.033 to 0.022	0.70553	0.889832	-0.00431826	-0.043 to 0.026	-0.0154697	-0.082 to 0.051	0.647725	0.728456	-0.0135324	-0.083 to 0.044
LPC(16:0) [sn2]		-0.0119206	-0.039 to 0.015	0.382036	0.732001	-0.0105385	-0.053 to 0.018	0.00841228	-0.056 to 0.073	0.797622	0.858199	0.0103276	-0.055 to 0.068
LPC(16:1) [sn1]		-0.00801024	-0.04 to 0.024	0.626838	0.86399	-0.00708341	-0.049 to 0.027	-0.0507955	-0.129 to 0.027	0.201811	0.291088	-0.0488148	-0.14 to 0.02
LPC(16:1) [sn2]		-0.00984535	-0.044 to 0.024	0.570624	0.825022	-0.0102619	-0.047 to 0.03	-0.0651627	-0.147 to 0.017	0.120156	0.188747	-0.0655523	-0.141 to 0.019
LPC(17:0) [sn1]		0.0041506	-0.025 to 0.033	0.780646	0.929113	0.0050414	-0.038 to 0.034	0.00118729	-0.069 to 0.071	0.97358	0.983722	0.00224618	-0.073 to 0.067
LPC(17:1) (a) [sn1] [104_sn1]		0.00141608	-0.032 to 0.035	0.934523	0.976354	0.0012207	-0.037 to 0.036	-0.0577898	-0.139 to 0.023	0.163868	0.245485	-0.057336	-0.139 to 0.03
LPC(17:1) [sn1] (a) / LPC(17:1) [sn2] (b)		0.00744375	-0.027 to 0.042	0.670116	0.880051	0.00686824	-0.026 to 0.044	-0.0662837	-0.148 to 0.016	0.114583	0.181462	-0.0665633	-0.146 to 0.028
LPC(17:1) [sn1] (b)		-0.00244515	-0.04 to 0.035	0.898476	0.965845	-0.00410712	-0.043 to 0.035	-0.0890009	-0.178 to 0	0.0510757	0.0894689	-0.0903322	-0.182 to 0.003
LPC(17:1) [sn2] (a)		0.000373646	-0.034 to 0.035	0.983243	0.993486	-0.000250453	-0.036 to 0.038	-0.0723949	-0.156 to 0.011	0.0909432	0.14764	-0.0718673	-0.171 to 0.011
LPC(18:0) [sn1]		-0.0024374	-0.03 to 0.025	0.862462	0.954736	-0.00143038	-0.036 to 0.027	0.0504403	-0.015 to 0.116	0.134306	0.207613	0.0508414	-0.013 to 0.112
LPC(18:0) [sn2]		-0.0059113	-0.034 to 0.022	0.675897	0.880779	-0.00444366	-0.039 to 0.021	0.03491	-0.031 to 0.101	0.30281	0.400308	0.0361299	-0.026 to 0.096
LPC(18:1) [sn1]		-0.00361054	-0.035 to 0.027	0.819234	0.939034	-0.00274829	-0.041 to 0.03	-0.0268443	-0.101 to 0.048	0.480723	0.581968	-0.0269976	-0.1 to 0.048
LPC(18:1) [sn2]		-0.0155793	-0.049 to 0.017	0.355682	0.721876	-0.0141709	-0.056 to 0.018	-0.0612107	-0.14 to 0.018	0.130656	0.203185	-0.0596414	-0.139 to 0.018
LPC(18:2) [sn1]		-0.0134531	-0.051 to 0.024	0.48007	0.77775	-0.0123319	-0.05 to 0.023	-0.100307	-0.189 to -0.011	0.0279354	0.0530021	-0.0978137	-0.182 to -0.025
LPC(18:2) [sn2]		-0.015858	-0.054 to 0.022	0.410178	0.736447	-0.0145417	-0.053 to 0.018	-0.0987576	-0.189 to -0.009	0.032052	0.0593613	-0.0983769	-0.178 to -0.014
LPC(18:3) (a) [sn1] [104_sn1]		0.0108422	-0.026 to 0.048	0.568973	0.825022	0.0111422	-0.025 to 0.045	-0.0610643	-0.151 to 0.029	0.184887	0.272761	-0.0606058	-0.145 to 0.026
LPC(18:3) [sn1] (a)/LPC(18:3) [sn2] (b)		0.0119969	-0.025 to 0.049	0.530173	0.794235	0.0121967	-0.025 to 0.048	-0.0466819	-0.137 to 0.044	0.312941	0.412296	-0.0471759	-0.133 to 0.037
LPC(18:3) [sn1] (b)		0.020921	-0.017 to 0.059	0.283181	0.661453	0.0212816	-0.02 to 0.058	0.00680326	-0.086 to 0.099	0.885303	0.917216	0.0081118	-0.08 to 0.097
LPC(18:3) [sn2] (a)		0.0150947	-0.023 to 0.053	0.440316	0.752532	0.0160769	-0.023 to 0.054	-0.0656353	-0.158 to 0.027	0.165518	0.247479	-0.0658393	-0.151 to 0.024
LPC(19:0) (a) [sn1] [104_sn1]		0.00184823	-0.03 to 0.034	0.91011	0.971722	0.00201576	-0.035 to 0.035	-0.0712778	-0.148 to 0.005	0.0679891	0.114874	-0.0695053	-0.142 to 0.011
LPC(19:0) [sn1] (a) / LPC(19:0) [sn2] (b)		-0.00800705	-0.039 to 0.023	0.611763	0.856135	-0.00730326	-0.045 to 0.022	-0.0231128	-0.098 to 0.051	0.543024	0.64138	-0.0196751	-0.091 to 0.039
LPC(19:0) [sn1] (b)		-0.00857528	-0.04 to 0.023	0.593968	0.842631	-0.00787849	-0.048 to 0.023	0.00886325	-0.067 to 0.085	0.818954	0.871753	0.0115462	-0.065 to 0.08
LPC(19:0) [sn2] (a)		-0.00176979	-0.034 to 0.03	0.913684	0.97259	-0.000812728	-0.038 to 0.03	-0.0504427	-0.127 to 0.026	0.197171	0.285456	-0.048914	-0.127 to 0.031
LPC(19:1) (a)		0.000600225	-0.031 to 0.032	0.970489	0.985726	0.00094928	-0.036 to 0.034	-0.0493477	-0.125 to 0.027	0.204255	0.292439	-0.0489253	-0.125 to 0.026
LPC(19:1) (b)		0.000169028	-0.032 to 0.032	0.991681	0.995529	-0.000539197	-0.036 to 0.036	-0.0188684	-0.095 to 0.057	0.62813	0.715755	-0.0173084	-0.092 to 0.057
LPC(19:1) (c)		0.0147243	-0.021 to 0.05	0.414726	0.736447	0.0150013	-0.022 to 0.05	-0.000113071	-0.085 to 0.084	0.997909	0.997909	-0.000372686	-0.081 to 0.081
LPC(20:0) [sn1]		-0.00859841	-0.039 to 0.022	0.580055	0.832782	-0.00824628	-0.046 to 0.02	-0.020757	-0.093 to 0.052	0.576019	0.671158	-0.019122	-0.088 to 0.043
LPC(20:0) [sn2]		-0.0166809	-0.047 to 0.014	0.28886	0.661556	-0.0160145	-0.051 to 0.012	-0.0368007	-0.11 to 0.037	0.326019	0.42735	-0.0346941	-0.103 to 0.027
LPC(20:1) [sn1]		-0.00601975	-0.032 to 0.02	0.650592	0.872601	-0.00444347	-0.043 to 0.023	0.0337307	-0.029 to 0.096	0.28936	0.389157	0.0346209	-0.026 to 0.085
LPC(20:1) [sn2]		-0.00945576	-0.038 to 0.019	0.516206	0.791142	-0.00945733	-0.045 to 0.019	0.0425457	-0.026 to 0.111	0.222735	0.313688	0.0448566	-0.026 to 0.103
LPC(20:2) [sn1]		-0.00700623	-0.037 to 0.023	0.650656	0.872601	-0.00538117	-0.043 to 0.023	0.00825942	-0.064 to 0.081	0.823189	0.87267	0.0101163	-0.058 to 0.08
LPC(20:2) [sn2]		-0.00163899	-0.034 to 0.031	0.921166	0.976354	9.27587e-05	-0.039 to 0.028	0.00692529	-0.071 to 0.084	0.861021	0.898054	0.00887051	-0.076 to 0.077
LPC(20:3) [sn1]		0.0221889	-0.014 to 0.058	0.228635	0.610752	0.0228791	-0.016 to 0.062	0.0779155	-0.009 to 0.165	0.0785908	0.128935	0.0789362	-0.008 to 0.166
LPC(20:3) [sn2]		0.0204308	-0.017 to 0.057	0.280104	0.660672	0.0199937	-0.018 to 0.058	0.0808547	-0.008 to 0.17	0.0748185	0.123268	0.0827884	-0.002 to 0.163
LPC(20:4) [sn1]		0.00342479	-0.029 to 0.036	0.837441	0.950079	0.00359717	-0.033 to 0.039	0.0726948	-0.005 to 0.151	0.0681822	0.114874	0.0747931	-0.005 to 0.147
LPC(20:4) [sn2]		-0.00267512	-0.036 to 0.031	0.875541	0.962098	-0.00186987	-0.038 to 0.033	0.0582942	-0.021 to 0.138	0.151967	0.230776	0.059596	-0.014 to 0.134
LPC(20:5) [sn1]		0.00603952	-0.03 to 0.042	0.739469	0.907956	0.0051535	-0.027 to 0.042	0.0313452	-0.054 to 0.117	0.472597	0.575722	0.0300354	-0.052 to 0.115
LPC(20:5) [sn2]		0.00894776	-0.027 to 0.045	0.629569	0.864242	0.00789311	-0.026 to 0.049	0.0275911	-0.06 to 0.115	0.535372	0.636215	0.0258293	-0.057 to 0.122
LPC(22:0) [sn1]		-0.00087623	-0.04 to 0.038	0.964942	0.983109	0.000392469	-0.038 to 0.035	-0.129622	-0.222 to -0.037	0.00629695	0.014543	-0.130044	-0.214 to -0.031
LPC(22:0) [sn2]		-0.0242693	-0.064 to 0.015	0.232131	0.610752	-0.0210873	-0.065 to 0.013	-0.148653	-0.243 to -0.055	0.00208091	0.00553009	-0.145883	-0.248 to -0.063
LPC(22:1) [sn1]		-0.0197514	-0.051 to 0.011	0.214533	0.591739	-0.0196355	-0.054 to 0.011	-0.0410554	-0.116 to 0.034	0.283081	0.382702	-0.0409682	-0.117 to 0.028
LPC(22:1) [sn2]		-0.0181361	-0.05 to 0.014	0.270524	0.65602	-0.0177217	-0.052 to 0.01	-0.0346554	-0.112 to 0.043	0.379421	0.486946	-0.0335187	-0.112 to 0.032
LPC(22:4) [sn1]		0.00724295	-0.025 to 0.039	0.659756	0.879674	0.00820907	-0.033 to 0.042	0.071917	-0.005 to 0.149	0.0682434	0.114874	0.0723784	-0.002 to 0.145
LPC(22:4) [sn2]		0.0116578	-0.022 to 0.046	0.501127	0.787196	0.0119884	-0.024 to 0.046	0.0694013	-0.012 to 0.151	0.0949962	0.153258	0.0689928	-0.007 to 0.145
LPC(22:5) (n3) [sn1] [104_sn1]		-0.0139269	-0.047 to 0.02	0.414593	0.736447	-0.0145522	-0.047 to 0.021	-0.0197615	-0.1 to 0.061	0.629736	0.716533	-0.0184544	-0.098 to 0.049
LPC(22:5) [sn1] (n3)/LPC(22:5) [sn2] (n6)		-0.00717837	-0.041 to 0.026	0.673647	0.880051	-0.00779231	-0.045 to 0.026	-0.0124971	-0.093 to 0.068	0.760077	0.828398	-0.0116715	-0.096 to 0.064
LPC(22:5) [sn1] (n6)		0.00710383	-0.028 to 0.042	0.689162	0.888356	0.00791396	-0.028 to 0.042	0.0785643	-0.005 to 0.162	0.0648062	0.109914	0.0798289	0.003 to 0.168
LPC(22:5) [sn2] (n3)		-0.0138233	-0.049 to 0.021	0.442209	0.752532	-0.0135076	-0.049 to 0.022	-0.0199962	-0.104 to 0.064	0.642951	0.724194	-0.0183398	-0.106 to 0.061
LPC(22:6) [sn1]		-0.0253786	-0.058 to 0.008	0.131736	0.485581	-0.023903	-0.058 to 0.01	0.0649234	-0.014 to 0.144	0.106227	0.169266	0.06643	-0.019 to 0.145
LPC(22:6) [sn2]		-0.0360277	-0.07 to -0.002	0.0365763	0.267001	-0.0350541	-0.069 to -0.006	0.0538345	-0.027 to 0.134	0.191376	0.279151	0.0541617	-0.027 to 0.141
LPC(24:0) [sn1]		0.00627863	-0.034 to 0.047	0.76087	0.918838	0.00687727	-0.034 to 0.046	-0.0777354	-0.174 to 0.019	0.115826	0.182894	-0.0770415	-0.177 to 0.016
LPC(24:0) [sn2]		-0.00354937	-0.044 to 0.037	0.862258	0.954736	-0.00340877	-0.043 to 0.034	-0.0910116	-0.187 to 0.005	0.0627981	0.107338	-0.0901971	-0.192 to 0.004
LPC(26:0) [sn1]		0.0319863	-0.005 to 0.069	0.095127	0.420927	0.0321102	-0.015 to 0.071	0.014554	-0.075 to 0.104	0.750877	0.821834	0.0159429	-0.085 to 0.118
LPC(26:0) [sn2]		0.0137513	-0.023 to 0.051	0.469686	0.777135	0.0131327	-0.026 to 0.052	-0.0604222	-0.15 to 0.029	0.186169	0.27413	-0.0623672	-0.153 to 0.049
LPC(O-16:0)		0.00073309	-0.024 to 0.026	0.953825	0.979058	0.00193919	-0.036 to 0.027	0.0236594	-0.036 to 0.083	0.437671	0.542544	0.0259391	-0.034 to 0.081
LPC(O-18:0)		0.00268245	-0.024 to 0.03	0.846631	0.953693	0.00329258	-0.036 to 0.032	0.016656	-0.049 to 0.082	0.617364	0.707643	0.017394	-0.051 to 0.081
LPC(O-18:1)		0.00785782	-0.015 to 0.031	0.503847	0.78784	0.00917981	-0.032 to 0.035	0.0464061	-0.009 to 0.102	0.100375	0.160932	0.0474765	-0.005 to 0.1
LPC(O-20:0)		0.00466487	-0.028 to 0.037	0.7776	0.927176	0.00621935	-0.039 to 0.041	0.0215475	-0.056 to 0.099	0.587271	0.680182	0.0229666	-0.055 to 0.099
LPC(O-20:1)		0.0318219	0.006 to 0.058	0.0161399	0.19007	0.0328102	-0.002 to 0.062	0.105364	0.043 to 0.167	0.000946905	0.00275205	0.10721	0.043 to 0.167
LPC(O-22:0)		0.00715241	-0.029 to 0.044	0.700934	0.889832	0.00696972	-0.036 to 0.049	0.00703909	-0.081 to 0.095	0.875071	0.909043	0.00371008	-0.08 to 0.101
LPC(O-22:1)		0.0294828	-0.004 to 0.063	0.0879078	0.404381	0.0295282	-0.006 to 0.066	0.105917	0.025 to 0.187	0.0108047	0.0238874	0.104393	0.021 to 0.194
LPC(O-24:0)		0.0276065	-0.009 to 0.064	0.138957	0.488656	0.027807	-0.014 to 0.066	-0.000498123	-0.089 to 0.088	0.991175	0.996311	-0.00188369	-0.092 to 0.097
LPC(O-24:1)		0.0423186	0.007 to 0.078	0.0201307	0.208286	0.0425443	0.008 to 0.077	0.070758	-0.015 to 0.157	0.107715	0.171284	0.0713098	-0.009 to 0.161
LPC(O-24:2)		0.0535901	0.019 to 0.088	0.00220157	0.12733	0.0542665	0.02 to 0.086	0.0369902	-0.045 to 0.119	0.379642	0.486946	0.038031	-0.039 to 0.124
LPC(P-16:0)		-0.0299806	-0.055 to -0.005	0.0213689	0.215436	-0.0285749	-0.063 to -0.002	-0.120787	-0.181 to -0.06	0.000102987	0.000401597	-0.118228	-0.183 to -0.064
LPC(P-17:0) (a)		-0.0293468	-0.058 to 0	0.0485627	0.283412	-0.0300819	-0.064 to 0.003	-0.118383	-0.187 to -0.049	0.000823894	0.00244954	-0.116746	-0.191 to -0.056
LPC(P-17:0) (b)		-0.0239513	-0.051 to 0.003	0.0859852	0.404381	-0.024509	-0.057 to 0.009	-0.117942	-0.182 to -0.053	0.000372714	0.00127412	-0.116024	-0.188 to -0.057
LPC(P-18:0)		-0.0306359	-0.058 to -0.003	0.0306163	0.242431	-0.0296612	-0.065 to -0.002	-0.0888781	-0.155 to -0.023	0.00883006	0.0198612	-0.0889272	-0.16 to -0.023
LPC(P-18:1)		-0.0265533	-0.051 to -0.002	0.0323624	0.251132	-0.0258302	-0.06 to -0.001	-0.10063	-0.158 to -0.043	0.000706188	0.00214903	-0.0980022	-0.168 to -0.045
LPC(P-20:0)		-0.0258182	-0.06 to 0.008	0.13626	0.488656	-0.0263052	-0.06 to 0.011	-0.092522	-0.174 to -0.011	0.0260404	0.0500182	-0.0912746	-0.165 to -0.017
PE(15-MHDA_18:1)		0.0446193	0.006 to 0.084	0.0252767	0.226357	0.0425803	0.005 to 0.087	0.098597	0.005 to 0.192	0.0396385	0.0717005	0.0975303	0.012 to 0.19
PE(15-MHDA_18:2)		0.037909	-0.002 to 0.078	0.0612304	0.320522	0.0369746	0.002 to 0.081	0.120154	0.025 to 0.215	0.0133459	0.0285301	0.11955	0.018 to 0.223
PE(15-MHDA_20:4)		0.0294123	-0.008 to 0.067	0.123061	0.476185	0.0286396	-0.006 to 0.069	0.101827	0.013 to 0.191	0.0255072	0.0491156	0.100699	0.013 to 0.202
PE(15-MHDA_22:6)		0.0164271	-0.02 to 0.053	0.375087	0.729493	0.0155303	-0.019 to 0.05	0.113925	0.028 to 0.2	0.0098314	0.0219229	0.114428	0.029 to 0.204
PE(16:0_16:0)		0.0115848	-0.027 to 0.051	0.561374	0.821721	0.0120814	-0.028 to 0.053	0.092028	-0.001 to 0.186	0.0543027	0.0938506	0.0930688	0.002 to 0.183
PE(16:0_16:1)		0.0300283	-0.009 to 0.069	0.133939	0.488656	0.0284858	-0.01 to 0.069	0.135755	0.042 to 0.229	0.00467486	0.0113365	0.133793	0.043 to 0.231
PE(16:0_18:1)		0.0454121	0.007 to 0.083	0.0196956	0.206658	0.0452854	0.01 to 0.082	0.210212	0.121 to 0.3	5.56349e-06	3.27066e-05	0.20919	0.111 to 0.294
PE(16:0_18:2)		0.0473051	0.01 to 0.084	0.0127179	0.171347	0.0476122	0.012 to 0.084	0.237398	0.151 to 0.324	1.27018e-07	1.17341e-06	0.237003	0.14 to 0.327
PE(16:0_18:3) (a)		0.057016	0.02 to 0.094	0.00262703	0.127411	0.0561983	0.023 to 0.089	0.150996	0.062 to 0.24	0.000927861	0.00270684	0.151334	0.058 to 0.235
PE(16:0_18:3) (b)		0.0588737	0.021 to 0.096	0.00223194	0.12733	0.0577444	0.023 to 0.095	0.196396	0.108 to 0.285	1.70991e-05	8.39802e-05	0.195211	0.116 to 0.283
PE(16:0_20:3)		0.0611067	0.022 to 0.1	0.00246127	0.12733	0.0599521	0.024 to 0.101	0.201113	0.107 to 0.295	3.09609e-05	0.000138079	0.199601	0.101 to 0.292
PE(16:0_20:4)		0.0355788	0 to 0.071	0.0485088	0.283412	0.0340968	0.001 to 0.074	0.271105	0.19 to 0.352	1.33818e-10	3.84604e-09	0.269088	0.182 to 0.357
PE(16:0_20:5)		0.0297253	-0.008 to 0.068	0.12534	0.481505	0.0280481	-0.006 to 0.072	0.108088	0.018 to 0.199	0.0195679	0.0391884	0.110184	0.015 to 0.194
PE(16:0_22:6)		0.0111027	-0.022 to 0.044	0.51068	0.791142	0.0113631	-0.019 to 0.043	0.226385	0.15 to 0.303	1.14887e-08	1.81373e-07	0.227199	0.145 to 0.305
PE(16:1_18:2)		0.0309392	-0.009 to 0.071	0.131682	0.485581	0.0295724	-0.009 to 0.073	0.121732	0.026 to 0.217	0.0128202	0.0276269	0.12376	0.024 to 0.213
PE(16:1_20:4)		0.0393202	0.002 to 0.077	0.0414202	0.272391	0.0381802	0.002 to 0.079	0.116481	0.027 to 0.206	0.0112415	0.0245729	0.117434	0.014 to 0.202
PE(17:0_18:1)		0.0490378	0.01 to 0.088	0.0135616	0.172521	0.0482725	0.009 to 0.091	0.178185	0.086 to 0.271	0.000183227	0.000667533	0.17886	0.075 to 0.266
PE(17:0_18:2)		0.0514391	0.013 to 0.09	0.00948903	0.155477	0.0502452	0.018 to 0.095	0.198724	0.107 to 0.29	2.62145e-05	0.00012037	0.196678	0.104 to 0.278
PE(17:0_20:4)		0.0494998	0.013 to 0.086	0.00736951	0.150871	0.0486763	0.015 to 0.082	0.217552	0.133 to 0.302	7.05074e-07	5.31084e-06	0.216808	0.131 to 0.302
PE(17:0_22:6)		0.018357	-0.016 to 0.052	0.289663	0.661556	0.0182498	-0.013 to 0.051	0.189967	0.11 to 0.27	4.00578e-06	2.48679e-05	0.191639	0.102 to 0.268
PE(18:0_18:1)		0.0546335	0.016 to 0.093	0.00588644	0.150871	0.0551367	0.014 to 0.09	0.20936	0.118 to 0.301	9.45303e-06	4.99017e-05	0.210838	0.108 to 0.301
PE(18:0_18:2)		0.0520729	0.014 to 0.09	0.00802588	0.150871	0.0517045	0.011 to 0.085	0.253233	0.164 to 0.343	4.74011e-08	5.10878e-07	0.253494	0.164 to 0.34
PE(18:0_20:3) (a)		0.0649769	0.027 to 0.103	0.0008243	0.12733	0.0636145	0.026 to 0.106	0.273228	0.185 to 0.361	2.59147e-09	4.57041e-08	0.273326	0.174 to 0.356
PE(18:0_20:3) (b)		0.0563303	0.017 to 0.095	0.0048814	0.150871	0.056165	0.015 to 0.093	0.191781	0.099 to 0.285	6.03432e-05	0.000246454	0.18863	0.093 to 0.301
PE(18:0_20:4)		0.0501145	0.013 to 0.087	0.00789415	0.150871	0.0497201	0.017 to 0.087	0.333502	0.25 to 0.417	3.03113e-14	3.92026e-12	0.334949	0.246 to 0.421
PE(18:0_22:4)		0.0631918	0.026 to 0.101	0.000995304	0.12733	0.062552	0.024 to 0.101	0.278787	0.192 to 0.366	7.36675e-10	1.54503e-08	0.276862	0.186 to 0.376
PE(18:0_22:5) (n3)		0.0495413	0.012 to 0.087	0.0102041	0.158368	0.0480263	0.012 to 0.089	0.214235	0.126 to 0.303	2.81444e-06	1.77561e-05	0.216587	0.114 to 0.298
PE(18:0_22:5) (n6)		0.0526933	0.016 to 0.089	0.00466079	0.150871	0.0520576	0.022 to 0.092	0.249199	0.164 to 0.334	1.60941e-08	2.2584e-07	0.247692	0.158 to 0.345
PE(18:0_22:6)		0.0161386	-0.018 to 0.05	0.350764	0.720087	0.0163841	-0.012 to 0.048	0.277325	0.201 to 0.354	5.47125e-12	2.88717e-10	0.278317	0.188 to 0.352
PE(18:1_18:1)		0.0450484	0.006 to 0.084	0.0234392	0.225639	0.0458454	0.005 to 0.084	0.158687	0.066 to 0.251	0.000806732	0.00241708	0.159028	0.069 to 0.25
PE(18:1_18:2)		0.0453986	0.007 to 0.083	0.0196035	0.206658	0.0460666	0.004 to 0.08	0.17753	0.088 to 0.267	0.000124584	0.000471598	0.178603	0.079 to 0.263
PE(18:1_22:6) (a)		0.0082937	-0.029 to 0.046	0.663236	0.880051	0.00820271	-0.027 to 0.044	0.186166	0.099 to 0.273	3.52016e-05	0.000155207	0.185784	0.103 to 0.281
PE(18:1_22:6) (b)		0.0209869	-0.016 to 0.058	0.268195	0.65388	0.0202512	-0.013 to 0.057	0.169763	0.082 to 0.257	0.000166814	0.000616417	0.169165	0.08 to 0.266
PE(20:0_20:4)		0.0284987	-0.006 to 0.063	0.102617	0.437531	0.0281944	-0.007 to 0.068	0.181196	0.101 to 0.261	1.22517e-05	6.25484e-05	0.180199	0.093 to 0.266
PE(36:0)		0.0271092	-0.013 to 0.067	0.183591	0.551914	0.0251775	-0.01 to 0.064	0.027059	-0.068 to 0.122	0.578498	0.672027	0.0249057	-0.055 to 0.122
PE(38:5) (a)		0.0485342	0.011 to 0.086	0.0108638	0.162122	0.0486362	0.013 to 0.086	0.173675	0.086 to 0.262	0.000125465	0.000472627	0.173208	0.084 to 0.263
PE(38:5) (b)		0.0454136	0.008 to 0.083	0.018306	0.205876	0.044009	0.012 to 0.085	0.173727	0.085 to 0.263	0.000152421	0.000568648	0.17199	0.09 to 0.267
PE(O-16:0/18:2)		0.00154504	-0.037 to 0.04	0.938001	0.976354	0.00146585	-0.036 to 0.039	-0.264907	-0.355 to -0.175	1.65157e-08	2.2584e-07	-0.263587	-0.355 to -0.17
PE(O-16:0/20:3)		0.0127241	-0.026 to 0.052	0.523353	0.793237	0.012162	-0.024 to 0.053	-0.22262	-0.314 to -0.131	2.46813e-06	1.56989e-05	-0.221624	-0.319 to -0.131
PE(O-16:0/20:4)		-0.0206951	-0.059 to 0.018	0.293783	0.666595	-0.0201491	-0.056 to 0.011	-0.291245	-0.38 to -0.202	3.28167e-10	7.48992e-09	-0.290033	-0.379 to -0.208
PE(O-16:0/22:4)		0.0114764	-0.027 to 0.05	0.556929	0.820071	0.00989562	-0.026 to 0.05	-0.201939	-0.291 to -0.112	1.23834e-05	6.28074e-05	-0.203492	-0.291 to -0.118
PE(O-16:0/22:6)		-0.033204	-0.068 to 0.002	0.0642047	0.327782	-0.033453	-0.062 to -0.003	-0.218098	-0.3 to -0.136	2.66047e-07	2.31969e-06	-0.217692	-0.296 to -0.131
PE(O-18:0/20:4)		-0.0255548	-0.063 to 0.012	0.178812	0.548452	-0.0262577	-0.061 to 0.013	-0.253295	-0.34 to -0.167	1.70361e-08	2.2584e-07	-0.251708	-0.35 to -0.168
PE(O-18:0/22:5)		-0.00973578	-0.047 to 0.028	0.613417	0.856135	-0.0112665	-0.05 to 0.028	-0.227465	-0.315 to -0.14	5.80993e-07	4.55405e-06	-0.226097	-0.318 to -0.144
PE(O-18:0/22:6)		-0.0442306	-0.078 to -0.011	0.00961715	0.155477	-0.0453889	-0.074 to -0.014	-0.23022	-0.308 to -0.152	1.35426e-08	2.0606e-07	-0.234115	-0.308 to -0.146
PE(O-18:1/18:2)		-0.00815285	-0.046 to 0.03	0.672637	0.880051	-0.00866815	-0.041 to 0.03	-0.237209	-0.324 to -0.15	1.5523e-07	1.41716e-06	-0.235858	-0.327 to -0.157
PE(O-18:1/22:6)		-0.0334953	-0.067 to 0	0.0495603	0.283412	-0.0336155	-0.064 to -0.004	-0.16983	-0.248 to -0.092	2.58843e-05	0.000119561	-0.16886	-0.25 to -0.09
PE(O-34:1)		-0.0197637	-0.058 to 0.018	0.307082	0.682795	-0.0210504	-0.056 to 0.019	-0.271719	-0.359 to -0.185	1.8859e-09	3.56941e-08	-0.273464	-0.361 to -0.191
PE(O-36:5)		-0.00567068	-0.045 to 0.033	0.775188	0.927176	-0.00695166	-0.043 to 0.033	-0.246376	-0.337 to -0.156	1.60952e-07	1.45232e-06	-0.248193	-0.329 to -0.151
PE(O-38:5) (a)		-0.0153062	-0.053 to 0.023	0.428007	0.751432	-0.0158747	-0.052 to 0.021	-0.285897	-0.373 to -0.199	2.89666e-10	6.91258e-09	-0.285532	-0.372 to -0.196
PE(O-38:5) (b)		-0.00626908	-0.045 to 0.033	0.752388	0.916567	-0.00804269	-0.044 to 0.03	-0.237421	-0.328 to -0.147	4.38763e-07	3.66107e-06	-0.239114	-0.324 to -0.137
PE(P-15:0/20:4) (a)		-0.00189787	-0.038 to 0.034	0.917966	0.975762	-0.00263077	-0.038 to 0.032	0.0140084	-0.073 to 0.101	0.752788	0.822766	0.0137747	-0.069 to 0.103
PE(P-15:0/20:4) (b)		-0.0056767	-0.044 to 0.032	0.769475	0.923148	-0.00720842	-0.039 to 0.034	-0.0394382	-0.131 to 0.052	0.397653	0.505039	-0.0399276	-0.146 to 0.05
PE(P-15:0/22:6) (a)		-0.0251836	-0.062 to 0.011	0.176542	0.548315	-0.026179	-0.056 to 0.015	-0.040049	-0.128 to 0.048	0.372693	0.479618	-0.0411069	-0.126 to 0.063
PE(P-15:0/22:6) (b)		-0.0351965	-0.072 to 0.001	0.0598768	0.320522	-0.0356952	-0.077 to 0.003	-0.152173	-0.239 to -0.065	0.000645145	0.00201057	-0.151488	-0.238 to -0.066
PE(P-16:0/18:1)		-0.0145557	-0.054 to 0.024	0.464301	0.771734	-0.0155143	-0.055 to 0.026	-0.145842	-0.239 to -0.053	0.002191	0.00572465	-0.142168	-0.247 to -0.051
PE(P-16:0/18:2)		-0.00364727	-0.042 to 0.035	0.853244	0.953693	-0.00414302	-0.043 to 0.039	-0.166054	-0.257 to -0.075	0.000399383	0.00135337	-0.16412	-0.258 to -0.072
PE(P-16:0/18:3)		0.00719118	-0.033 to 0.047	0.724142	0.903849	0.00655165	-0.033 to 0.048	-0.17689	-0.272 to -0.082	0.000281179	0.000991794	-0.177204	-0.271 to -0.069
PE(P-16:0/20:3) (a)		-0.0201322	-0.059 to 0.019	0.308477	0.68283	-0.0218663	-0.058 to 0.019	-0.15787	-0.25 to -0.066	0.000830193	0.00244954	-0.159947	-0.244 to -0.064
PE(P-16:0/20:3) (b)		-0.028616	-0.068 to 0.011	0.15912	0.529913	-0.0308143	-0.066 to 0.014	-0.182618	-0.277 to -0.088	0.000169913	0.000624894	-0.183233	-0.274 to -0.072
PE(P-16:0/20:4)		-0.0386519	-0.075 to -0.002	0.0398001	0.268607	-0.03897	-0.071 to -0.005	-0.125576	-0.213 to -0.038	0.00523287	0.0124945	-0.12364	-0.213 to -0.043
PE(P-16:0/20:5)		-0.0221924	-0.06 to 0.016	0.251065	0.638681	-0.0218562	-0.059 to 0.017	-0.173408	-0.263 to -0.084	0.00017771	0.000650485	-0.169644	-0.268 to -0.085
PE(P-16:0/22:4)		-0.000307115	-0.035 to 0.034	0.986032	0.993716	-0.000675673	-0.035 to 0.03	-0.141512	-0.222 to -0.061	0.000652447	0.00202519	-0.144072	-0.216 to -0.055
PE(P-16:0/22:5) (n3)		-0.011144	-0.051 to 0.028	0.580587	0.832782	-0.0122504	-0.048 to 0.032	-0.179136	-0.273 to -0.086	0.000193688	0.000695841	-0.180157	-0.269 to -0.092
PE(P-16:0/22:5) (n6)		0.00797136	-0.029 to 0.045	0.673469	0.880051	0.00679375	-0.025 to 0.041	-0.104175	-0.193 to -0.016	0.0213799	0.0423235	-0.106941	-0.187 to -0.022
PE(P-16:0/22:6)		-0.0465474	-0.081 to -0.012	0.00787111	0.150871	-0.0455527	-0.083 to -0.018	-0.125982	-0.207 to -0.045	0.00252507	0.00650982	-0.125479	-0.197 to -0.05
PE(P-17:0/20:4) (a)		-0.020084	-0.055 to 0.015	0.266564	0.65388	-0.0217313	-0.057 to 0.016	-0.148866	-0.233 to -0.065	0.000567035	0.00181078	-0.146779	-0.238 to -0.069
PE(P-17:0/20:4) (b)		-0.0286739	-0.064 to 0.007	0.11521	0.465639	-0.0277752	-0.067 to 0.007	-0.142621	-0.228 to -0.058	0.00106856	0.00303737	-0.140905	-0.221 to -0.055
PE(P-17:0/22:6) (a)		-0.0412263	-0.073 to -0.01	0.0106277	0.161708	-0.0423501	-0.073 to -0.013	-0.136191	-0.211 to -0.061	0.000416881	0.00140652	-0.136717	-0.214 to -0.056
PE(P-17:0/22:6) (b)		-0.0411592	-0.073 to -0.009	0.0124859	0.171347	-0.0417477	-0.069 to -0.009	-0.12764	-0.205 to -0.051	0.00122542	0.00344537	-0.126633	-0.205 to -0.055
PE(P-18:0/18:1)		-0.0215966	-0.061 to 0.018	0.283845	0.661453	-0.0229904	-0.064 to 0.022	-0.153504	-0.247 to -0.06	0.00145496	0.00400372	-0.153625	-0.249 to -0.058
PE(P-18:0/18:2)		-0.0164074	-0.055 to 0.022	0.408688	0.736447	-0.0179409	-0.055 to 0.025	-0.195637	-0.288 to -0.104	3.62036e-05	0.000158723	-0.196367	-0.289 to -0.097
PE(P-18:0/18:3)		-0.0104249	-0.05 to 0.03	0.609727	0.856135	-0.011962	-0.049 to 0.026	-0.163537	-0.259 to -0.068	0.000817972	0.00244133	-0.164883	-0.257 to -0.068
PE(P-18:0/20:3) (a)		-0.0185361	-0.057 to 0.02	0.34374	0.713656	-0.0198648	-0.055 to 0.019	-0.146287	-0.238 to -0.055	0.00179614	0.00487344	-0.14449	-0.243 to -0.05
PE(P-18:0/20:3) (b)		-0.0150855	-0.054 to 0.024	0.450441	0.763193	-0.0168558	-0.051 to 0.026	-0.163057	-0.255 to -0.071	0.000592207	0.0018681	-0.165175	-0.237 to -0.059
PE(P-18:0/20:4)		-0.036764	-0.072 to -0.001	0.0438385	0.275024	-0.0372237	-0.068 to -0.002	-0.122812	-0.208 to -0.038	0.00495863	0.011913	-0.120856	-0.208 to -0.041
PE(P-18:0/20:5)		-0.0239928	-0.061 to 0.013	0.204048	0.578938	-0.0257158	-0.059 to 0.014	-0.168302	-0.256 to -0.081	0.000184097	0.000667566	-0.16655	-0.255 to -0.081
PE(P-18:0/22:4)		0.00289886	-0.031 to 0.037	0.866422	0.955961	0.00324462	-0.033 to 0.037	-0.0601542	-0.141 to 0.02	0.144254	0.221666	-0.0612355	-0.134 to 0.028
PE(P-18:0/22:5) (n3)		-0.0221798	-0.06 to 0.015	0.248952	0.635484	-0.0236932	-0.058 to 0.017	-0.151308	-0.241 to -0.062	0.000972842	0.0028071	-0.152755	-0.241 to -0.057
PE(P-18:0/22:5) (n6)		-0.0190188	-0.057 to 0.019	0.328107	0.698074	-0.0193438	-0.056 to 0.016	-0.111323	-0.202 to -0.02	0.0167581	0.034494	-0.112664	-0.201 to -0.02
PE(P-18:0/22:6)		-0.0467586	-0.079 to -0.014	0.00471166	0.150871	-0.0468317	-0.075 to -0.016	-0.119477	-0.197 to -0.042	0.00258741	0.00660471	-0.116623	-0.192 to -0.044
PE(P-18:1/18:1)		-0.0247066	-0.062 to 0.012	0.192786	0.558216	-0.0262469	-0.059 to 0.012	-0.205019	-0.292 to -0.118	5.12507e-06	3.08299e-05	-0.202905	-0.295 to -0.12
PE(P-18:1/18:1) (a)		-0.0294277	-0.066 to 0.007	0.117214	0.466452	-0.0298038	-0.068 to 0.004	-0.210076	-0.296 to -0.124	2.26967e-06	1.46772e-05	-0.206713	-0.303 to -0.125
PE(P-18:1/18:1) (b)		-0.00791443	-0.047 to 0.031	0.693031	0.888561	-0.00990239	-0.047 to 0.035	-0.147046	-0.24 to -0.054	0.00205249	0.00549217	-0.145879	-0.241 to -0.045
PE(P-18:1/18:2) (a)		-0.0202257	-0.058 to 0.018	0.294742	0.666821	-0.0187604	-0.058 to 0.015	-0.185728	-0.274 to -0.097	4.50569e-05	0.000188996	-0.181029	-0.279 to -0.103
PE(P-18:1/18:2) (b)		0.0137923	-0.027 to 0.054	0.504583	0.78784	0.0121196	-0.023 to 0.056	-0.165838	-0.262 to -0.07	0.000748354	0.00226845	-0.166038	-0.267 to -0.067
PE(P-18:1/18:3)		0.00165411	-0.04 to 0.043	0.937741	0.976354	-0.000248534	-0.043 to 0.045	-0.196621	-0.294 to -0.099	9.1479e-05	0.000358524	-0.195405	-0.306 to -0.09
PE(P-18:1/20:3) (a)		-0.011871	-0.05 to 0.026	0.541049	0.80278	-0.0126827	-0.05 to 0.028	-0.184382	-0.274 to -0.095	6.78236e-05	0.0002727	-0.184906	-0.264 to -0.093
PE(P-18:1/20:3) (b)		-0.0125188	-0.052 to 0.027	0.538684	0.800914	-0.0140463	-0.052 to 0.03	-0.162198	-0.256 to -0.068	0.000793889	0.00238782	-0.159428	-0.26 to -0.073
PE(P-18:1/20:4) (a)		-0.0285883	-0.065 to 0.008	0.127654	0.483218	-0.0291459	-0.064 to 0.005	-0.142988	-0.23 to -0.056	0.00139438	0.00387531	-0.141701	-0.229 to -0.056
PE(P-18:1/20:4) (b)		-0.00983474	-0.047 to 0.027	0.604231	0.854068	-0.0103915	-0.045 to 0.032	-0.109416	-0.198 to -0.021	0.0153312	0.0319813	-0.105072	-0.211 to -0.03
PE(P-18:1/20:5) (a)		-0.0227043	-0.06 to 0.015	0.233203	0.610752	-0.0236625	-0.058 to 0.015	-0.204596	-0.292 to -0.117	6.52658e-06	3.69681e-05	-0.203927	-0.296 to -0.106
PE(P-18:1/20:5) (b)		0.00670841	-0.032 to 0.045	0.733642	0.905524	0.00460967	-0.029 to 0.045	-0.12983	-0.221 to -0.038	0.00563358	0.0132877	-0.129569	-0.223 to -0.034
PE(P-18:1/22:4)		0.00774195	-0.029 to 0.045	0.681999	0.884847	0.00754213	-0.027 to 0.04	-0.192698	-0.279 to -0.107	1.46575e-05	7.25686e-05	-0.192256	-0.272 to -0.117
PE(P-18:1/22:5) (a)		-0.0201308	-0.057 to 0.017	0.289857	0.661556	-0.0221748	-0.054 to 0.019	-0.190609	-0.279 to -0.103	2.63712e-05	0.000120377	-0.18934	-0.276 to -0.102
PE(P-18:1/22:5) (b)		-0.00958721	-0.047 to 0.028	0.620027	0.857586	-0.0106064	-0.039 to 0.022	-0.144895	-0.235 to -0.055	0.00168763	0.00462757	-0.148923	-0.224 to -0.052
PE(P-18:1/22:6) (a)		-0.0317681	-0.065 to 0.001	0.0614055	0.320522	-0.0311753	-0.063 to -0.002	-0.0973449	-0.176 to -0.018	0.0159484	0.0330908	-0.0964857	-0.178 to -0.017
PE(P-18:1/22:6) (b)		-0.0261285	-0.06 to 0.008	0.132033	0.485581	-0.0253436	-0.06 to 0.004	-0.0965146	-0.177 to -0.016	0.0196447	0.0391884	-0.094616	-0.175 to -0.016
PE(P-19:0/20:4) (a)		-0.0143231	-0.05 to 0.022	0.435762	0.752532	-0.0157154	-0.052 to 0.022	-0.0693333	-0.155 to 0.016	0.11325	0.179718	-0.06657	-0.168 to 0.009
PE(P-19:0/20:4) (b)		-0.028159	-0.065 to 0.009	0.136599	0.488656	-0.0284226	-0.068 to 0.008	-0.106704	-0.195 to -0.018	0.0186203	0.0378255	-0.104678	-0.196 to -0.03
PE(P-20:0/18:1)		-0.0177583	-0.057 to 0.021	0.374325	0.729493	-0.0182722	-0.061 to 0.017	-0.0927278	-0.187 to 0.001	0.0538717	0.0933135	-0.0910492	-0.184 to 0
PE(P-20:0/18:2)		-0.0108582	-0.05 to 0.028	0.58294	0.833596	-0.011275	-0.055 to 0.027	-0.129285	-0.222 to -0.037	0.00637387	0.0146769	-0.127866	-0.224 to -0.035
PE(P-20:0/20:4)		-0.0304634	-0.067 to 0.006	0.101514	0.435221	-0.0296647	-0.068 to 0.005	-0.0294343	-0.117 to 0.058	0.510243	0.611032	-0.0290311	-0.105 to 0.051
PE(P-20:0/22:6)		-0.0370507	-0.072 to -0.002	0.0390585	0.268607	-0.0357577	-0.07 to -0.004	0.0307095	-0.053 to 0.115	0.474228	0.575902	0.0299599	-0.044 to 0.118
PE(P-20:1/20:4)		0.027106	-0.013 to 0.067	0.189079	0.554064	0.0274097	-0.012 to 0.064	0.116551	0.02 to 0.213	0.0183107	0.0373924	0.117142	0.013 to 0.214
PE(P-20:1/22:6)		0.0116553	-0.025 to 0.048	0.528117	0.793336	0.0129836	-0.025 to 0.045	0.135427	0.05 to 0.221	0.00208831	0.00553082	0.1351	0.055 to 0.226
LPE(16:0) [sn1]		-0.00990757	-0.044 to 0.024	0.571839	0.825022	-0.00886079	-0.053 to 0.026	0.0382259	-0.044 to 0.121	0.363838	0.469781	0.039648	-0.049 to 0.118
LPE(16:0) [sn2]		-0.0120179	-0.047 to 0.022	0.494987	0.78388	-0.0120907	-0.051 to 0.025	0.0248251	-0.058 to 0.108	0.556994	0.65489	0.0257225	-0.049 to 0.101
LPE(17:0) [sn1]		-0.00805896	-0.042 to 0.026	0.638973	0.868377	-0.00831257	-0.037 to 0.023	0.00679708	-0.074 to 0.088	0.869536	0.904504	0.0063974	-0.081 to 0.094
LPE(17:0) [sn2]		-0.00746965	-0.044 to 0.029	0.688668	0.888356	-0.00654835	-0.044 to 0.024	-0.00543675	-0.093 to 0.083	0.903643	0.932483	-0.00339017	-0.097 to 0.078
LPE(18:0) [sn1]		0.00679042	-0.023 to 0.037	0.657238	0.877825	0.00835273	-0.034 to 0.036	0.111959	0.041 to 0.183	0.00217824	0.00571053	0.115026	0.041 to 0.177
LPE(18:0) [sn2]		0.000745998	-0.03 to 0.031	0.961983	0.98267	0.00282172	-0.041 to 0.033	0.109464	0.037 to 0.182	0.00342756	0.00855236	0.112444	0.035 to 0.173
LPE(18:1) [sn1]		0.0114923	-0.025 to 0.048	0.536062	0.800914	0.0116406	-0.031 to 0.047	0.0596957	-0.028 to 0.147	0.180916	0.267921	0.0593286	-0.023 to 0.145
LPE(18:1) [sn2]		0.00516019	-0.032 to 0.043	0.787315	0.93157	0.006291	-0.036 to 0.04	0.0508325	-0.039 to 0.141	0.267698	0.365462	0.0538071	-0.041 to 0.124
LPE(18:2) [sn1]		0.0126297	-0.026 to 0.051	0.518093	0.791418	0.0145974	-0.026 to 0.048	0.0221094	-0.07 to 0.114	0.637311	0.721975	0.0261742	-0.063 to 0.098
LPE(18:2) [sn2]		-0.00259041	-0.041 to 0.036	0.895928	0.965845	-0.00148253	-0.038 to 0.035	0.00942603	-0.083 to 0.102	0.842476	0.883461	0.0115847	-0.078 to 0.095
LPE(20:4) [sn1]		0.014202	-0.024 to 0.052	0.462446	0.771734	0.0128296	-0.027 to 0.057	0.207956	0.119 to 0.297	5.86802e-06	3.34823e-05	0.206972	0.123 to 0.301
LPE(20:4) [sn2]		0.0038645	-0.033 to 0.041	0.839216	0.950519	0.00450577	-0.037 to 0.044	0.174745	0.087 to 0.263	0.000114852	0.000441215	0.175408	0.088 to 0.268
LPE(22:6) [sn1]		-0.0196665	-0.056 to 0.017	0.287145	0.661556	-0.0201688	-0.056 to 0.019	0.1269	0.041 to 0.213	0.00392	0.0096793	0.126122	0.042 to 0.217
LPE(22:6) [sn2]		-0.0299262	-0.067 to 0.007	0.110091	0.447282	-0.0290498	-0.066 to 0.006	0.147422	0.061 to 0.234	0.000919178	0.00269163	0.146335	0.058 to 0.232
LPE(P-16:0)		-0.0336227	-0.06 to -0.007	0.0128069	0.171347	-0.0328072	-0.07 to -0.006	0.000138914	-0.064 to 0.064	0.996597	0.997909	0.000922764	-0.063 to 0.056
LPE(P-18:0)		-0.0233127	-0.051 to 0.004	0.0950853	0.420927	-0.0224174	-0.061 to 0.006	-0.0114565	-0.077 to 0.055	0.733765	0.80996	-0.00995871	-0.081 to 0.048
LPE(P-18:1)		-0.0207349	-0.047 to 0.006	0.128937	0.485581	-0.0198349	-0.055 to 0.009	0.00458138	-0.06 to 0.069	0.889504	0.92034	0.00255161	-0.063 to 0.071
LPE(P-20:0)		-0.0160275	-0.048 to 0.016	0.320979	0.691888	-0.0148277	-0.051 to 0.015	-0.00403261	-0.081 to 0.073	0.918141	0.942431	-0.00332093	-0.078 to 0.068
PI (38:5) (b)		0.0351776	-0.004 to 0.074	0.0783783	0.380135	0.0346232	-0.004 to 0.075	0.0266797	-0.067 to 0.12	0.577058	0.67136	0.0285244	-0.066 to 0.121
PI(15-MHDA_20:4)\PI(17:0_20:4)		0.0320177	-0.006 to 0.071	0.10374	0.439905	0.0304861	-0.004 to 0.071	0.0327768	-0.06 to 0.126	0.489121	0.588462	0.0336936	-0.068 to 0.124
PI(16:0_16:1)		0.0127243	-0.025 to 0.051	0.512923	0.791142	0.0100265	-0.023 to 0.056	0.119538	0.029 to 0.21	0.0100717	0.0223944	0.118625	0.026 to 0.21
PI(16:0_20:3) (a)		0.0380274	-0.002 to 0.078	0.0615435	0.320522	0.0378958	0.001 to 0.076	0.0810974	-0.015 to 0.177	0.0976557	0.156896	0.0809517	-0.016 to 0.174
PI(16:0_20:3) (b)		0.0406251	0.002 to 0.079	0.038494	0.268607	0.0401724	0.001 to 0.076	0.0260518	-0.066 to 0.119	0.581197	0.674154	0.0289733	-0.073 to 0.131
PI(16:0_20:4)		0.0137243	-0.027 to 0.054	0.504263	0.78784	0.0128985	-0.026 to 0.055	0.098685	0.002 to 0.195	0.0451027	0.0806994	0.100254	-0.002 to 0.203
PI(16:0/16:0)		0.00511838	-0.033 to 0.043	0.79053	0.932297	0.00471324	-0.03 to 0.045	0.0839423	-0.006 to 0.174	0.0691018	0.115567	0.0851644	-0.009 to 0.178
PI(17:0_18:1)		0.030987	-0.008 to 0.07	0.116352	0.466452	0.0302387	-0.008 to 0.072	0.0580335	-0.035 to 0.151	0.220465	0.311056	0.058012	-0.031 to 0.156
PI(17:0_18:2)		0.0482012	0.01 to 0.087	0.0140858	0.176299	0.0476168	0.011 to 0.091	0.198359	0.107 to 0.289	2.31671e-05	0.000108956	0.19861	0.104 to 0.289
PI(18:0_18:1)		0.0291881	-0.01 to 0.068	0.142095	0.490069	0.030162	-0.008 to 0.065	0.0155804	-0.078 to 0.109	0.745038	0.818684	0.0169647	-0.085 to 0.114
PI(18:0_20:2)		0.0165613	-0.022 to 0.055	0.403679	0.736447	0.017511	-0.019 to 0.051	-0.112318	-0.205 to -0.02	0.0176506	0.036235	-0.109546	-0.221 to -0.029
PI(18:0_20:3) (a)		0.0134604	-0.022 to 0.049	0.454786	0.767712	0.0144103	-0.025 to 0.049	-0.110248	-0.194 to -0.026	0.010318	0.0228765	-0.107938	-0.208 to -0.033
PI(18:0_20:3) (b)		0.0285436	-0.009 to 0.066	0.137838	0.488656	0.0267012	-0.005 to 0.069	-0.112976	-0.203 to -0.023	0.0140692	0.0298297	-0.112606	-0.206 to -0.008
PI(18:0_20:4)		0.0142144	-0.024 to 0.052	0.466522	0.773549	0.01379	-0.025 to 0.052	-0.0588192	-0.15 to 0.032	0.207296	0.296246	-0.0599349	-0.146 to 0.031
PI(18:0_22:4)		0.0289377	-0.009 to 0.067	0.139009	0.488656	0.0288527	-0.007 to 0.071	-0.00141588	-0.094 to 0.091	0.976029	0.984913	-0.00270342	-0.091 to 0.107
PI(18:0_22:5) (n3)		-0.00126756	-0.038 to 0.035	0.945479	0.976354	-0.0028879	-0.039 to 0.04	0.0347347	-0.052 to 0.122	0.434246	0.540024	0.0358635	-0.054 to 0.129
PI(18:0_22:5) (n6)		0.0192485	-0.018 to 0.056	0.31032	0.68283	0.0189435	-0.016 to 0.052	0.049581	-0.04 to 0.139	0.27718	0.375378	0.0502427	-0.035 to 0.138
PI(18:0_22:6)		-0.0239102	-0.058 to 0.01	0.166046	0.53861	-0.0236784	-0.056 to 0.008	0.20298	0.124 to 0.282	6.52067e-07	4.96083e-06	0.202309	0.121 to 0.287
PI(18:1_18:2)		0.0360185	-0.002 to 0.075	0.0673633	0.337251	0.0367584	0 to 0.075	0.0853354	-0.006 to 0.177	0.0690815	0.115567	0.085177	0.005 to 0.175
PI(20:0_20:4)		0.0240085	-0.016 to 0.064	0.242187	0.622308	0.0247679	-0.013 to 0.061	-0.00494308	-0.101 to 0.091	0.91971	0.942794	-0.00763383	-0.101 to 0.083
PI(34:0)		-0.00133731	-0.039 to 0.036	0.944481	0.976354	-0.00308532	-0.04 to 0.037	0.0889282	-0.001 to 0.179	0.0537247	0.0932671	0.0886785	-0.003 to 0.184
PI(34:1)		0.022956	-0.015 to 0.061	0.241771	0.622308	0.0233307	-0.013 to 0.064	0.107622	0.016 to 0.2	0.0223946	0.0436638	0.108408	0.015 to 0.212
PI(36:2)		0.0242082	-0.015 to 0.063	0.223392	0.606126	0.0251046	-0.014 to 0.059	0.227776	0.137 to 0.319	1.28713e-06	9.16339e-06	0.230311	0.129 to 0.31
PI(37:6)		-0.0496513	-0.087 to -0.012	0.00948712	0.155477	-0.0505629	-0.09 to -0.009	-0.217486	-0.306 to -0.129	1.77571e-06	1.17773e-05	-0.217075	-0.315 to -0.124
PI(38:5) (a)		0.0402123	0 to 0.08	0.0499839	0.283412	0.0401217	0 to 0.087	0.136305	0.041 to 0.232	0.00551632	0.0130508	0.137357	0.035 to 0.243
PI(38:6)		-0.0145106	-0.05 to 0.021	0.423305	0.748257	-0.0145509	-0.045 to 0.022	0.247284	0.165 to 0.329	7.34687e-09	1.18774e-07	0.247054	0.163 to 0.333
PI(39:6)		0.00132065	-0.035 to 0.037	0.942441	0.976354	0.00123421	-0.031 to 0.036	0.156582	0.072 to 0.241	0.000335617	0.00116267	0.15681	0.067 to 0.242
PIP1(38:4)		-0.001228	-0.038 to 0.036	0.948323	0.976354	-0.00133954	-0.041 to 0.035	-0.0692209	-0.158 to 0.02	0.12781	0.19996	-0.0685283	-0.164 to 0.023
LPI(18:0) [sn1]		0.0135654	-0.023 to 0.05	0.464433	0.771734	0.0128858	-0.022 to 0.05	0.0367618	-0.05 to 0.124	0.408138	0.516664	0.0321732	-0.045 to 0.139
LPI(18:0) [sn2]		0.0098929	-0.029 to 0.049	0.616219	0.857586	0.00898822	-0.025 to 0.049	-0.0720603	-0.165 to 0.021	0.12813	0.200057	-0.0712354	-0.179 to 0.025
LPI(18:1) [sn1]		0.00216457	-0.035 to 0.04	0.910364	0.971722	0.00247577	-0.037 to 0.041	0.0334424	-0.057 to 0.124	0.470596	0.574475	0.0346217	-0.051 to 0.129
LPI(18:1) [sn2]		0.00622794	-0.033 to 0.045	0.753912	0.916984	0.00718544	-0.032 to 0.046	0.115648	0.023 to 0.209	0.0152985	0.0319813	0.116657	0.017 to 0.204
LPI(18:2) [sn1]		0.0165458	-0.022 to 0.055	0.40102	0.736447	0.0184798	-0.023 to 0.055	0.222895	0.133 to 0.313	1.68884e-06	1.12978e-05	0.223964	0.137 to 0.315
LPI(18:2) [sn2]		0.0293842	-0.01 to 0.068	0.140185	0.488967	0.0308881	-0.01 to 0.065	0.202144	0.111 to 0.293	1.77128e-05	8.59072e-05	0.200641	0.11 to 0.289
LPI(20:4) [sn1]		0.00814552	-0.031 to 0.047	0.680702	0.884798	0.0092809	-0.03 to 0.051	0.143446	0.052 to 0.235	0.00217719	0.00571053	0.14311	0.066 to 0.244
LPI(20:4) [sn2]		-0.0115246	-0.05 to 0.027	0.559446	0.820662	-0.0102526	-0.051 to 0.023	0.0360109	-0.056 to 0.128	0.44427	0.548098	0.0388912	-0.068 to 0.122
PS(36:1)		0.0186518	-0.012 to 0.049	0.232294	0.610752	0.0190099	-0.019 to 0.054	0.213766	0.143 to 0.285	6.35171e-09	1.04871e-07	0.211374	0.14 to 0.292
PS(36:2)		0.0282798	0 to 0.057	0.0543579	0.303466	0.0287239	-0.004 to 0.058	0.173589	0.107 to 0.241	5.70374e-07	4.51643e-06	0.173624	0.102 to 0.246
PS(38:3)		0.0114652	-0.019 to 0.042	0.462394	0.771734	0.0127465	-0.025 to 0.045	0.140094	0.068 to 0.212	0.000161955	0.000601324	0.138734	0.049 to 0.212
PS(38:4)		-0.0138033	-0.043 to 0.016	0.35699	0.721876	-0.0120787	-0.054 to 0.015	0.0785182	0.008 to 0.149	0.0288165	0.0545406	0.076988	-0.001 to 0.153
PS(38:5)		-0.0102614	-0.042 to 0.021	0.523373	0.793237	-0.00929566	-0.044 to 0.024	0.0752813	0 to 0.151	0.0506186	0.0888688	0.0759885	-0.012 to 0.149
PS(40:5)		-0.000363946	-0.032 to 0.031	0.982129	0.993486	0.00062685	-0.034 to 0.033	0.0549913	-0.021 to 0.131	0.158215	0.238861	0.0548423	-0.04 to 0.135
PS(40:6)		-0.0191786	-0.054 to 0.015	0.27573	0.65871	-0.0187628	-0.053 to 0.014	0.0337387	-0.049 to 0.117	0.426411	0.533702	0.0315739	-0.084 to 0.115
PG(34:1)		0.0186888	-0.02 to 0.057	0.340722	0.713656	0.0185696	-0.022 to 0.063	0.18199	0.091 to 0.273	0.000104258	0.000404522	0.183954	0.069 to 0.271
PG(36:1)		0.0157425	-0.022 to 0.053	0.408735	0.736447	0.0163026	-0.027 to 0.056	0.187682	0.099 to 0.276	3.64542e-05	0.000158924	0.189616	0.093 to 0.286
PG(36:2)		0.0367699	-0.002 to 0.075	0.0606145	0.320522	0.0373149	-0.002 to 0.079	0.279063	0.19 to 0.368	1.74214e-09	3.46641e-08	0.279962	0.175 to 0.374
CE(14:0)		-0.0390536	-0.078 to 0	0.0494904	0.283412	-0.0393448	-0.073 to 0.005	-0.211669	-0.303 to -0.12	7.00078e-06	3.88043e-05	-0.212054	-0.294 to -0.12
CE(15:0)		-0.027737	-0.067 to 0.011	0.162347	0.533818	-0.0277899	-0.068 to 0.014	-0.275299	-0.365 to -0.186	3.21272e-09	5.54016e-08	-0.279766	-0.36 to -0.187
CE(16:0)		-0.0186648	-0.058 to 0.02	0.346904	0.715952	-0.019476	-0.056 to 0.021	-0.0235392	-0.117 to 0.07	0.622648	0.711185	-0.0265598	-0.132 to 0.067
CE(16:1)		-0.0260273	-0.064 to 0.012	0.178547	0.548452	-0.0272331	-0.061 to 0.011	-0.176999	-0.267 to -0.087	0.000122059	0.00046659	-0.177826	-0.261 to -0.086
CE(16:2)		-0.04921	-0.089 to -0.01	0.0149202	0.182807	-0.0492581	-0.09 to -0.009	-0.376481	-0.465 to -0.288	1.13372e-15	2.19942e-13	-0.376335	-0.458 to -0.288
CE(17:0)		-0.0167907	-0.055 to 0.021	0.390033	0.736447	-0.0183424	-0.056 to 0.023	-0.060267	-0.151 to 0.031	0.194487	0.283102	-0.060024	-0.154 to 0.023
CE(17:1)		-0.0137944	-0.052 to 0.024	0.476674	0.77775	-0.015563	-0.05 to 0.026	-0.207303	-0.296 to -0.119	5.60957e-06	3.27295e-05	-0.20668	-0.291 to -0.118
CE(18:0)		-0.00672408	-0.044 to 0.031	0.724477	0.903849	-0.00663663	-0.042 to 0.034	-0.0101952	-0.099 to 0.079	0.822788	0.87267	-0.00978363	-0.107 to 0.083
CE(18:1)		0.00132426	-0.036 to 0.038	0.94404	0.976354	0.000778564	-0.037 to 0.038	-0.0475337	-0.136 to 0.04	0.290177	0.38958	-0.0499135	-0.143 to 0.057
CE(18:2)		-0.0277197	-0.069 to 0.014	0.188694	0.554064	-0.0282021	-0.076 to 0.017	-0.241776	-0.338 to -0.145	1.30999e-06	9.24137e-06	-0.243803	-0.345 to -0.134
CE(18:3)		-0.0199593	-0.06 to 0.02	0.332716	0.701597	-0.0210519	-0.059 to 0.029	-0.270972	-0.365 to -0.177	2.81333e-08	3.30779e-07	-0.273803	-0.364 to -0.18
CE(20:0)		0.00184612	-0.034 to 0.037	0.919178	0.975762	0.00108893	-0.034 to 0.038	0.0541732	-0.031 to 0.139	0.213487	0.303974	0.0544683	-0.029 to 0.137
CE(20:1)		0.0158165	-0.02 to 0.051	0.38521	0.736263	0.0161226	-0.02 to 0.05	0.060893	-0.024 to 0.146	0.160344	0.240671	0.0618752	-0.028 to 0.153
CE(20:2)		0.0267468	-0.011 to 0.064	0.163235	0.534156	0.0250909	-0.008 to 0.064	0.0795847	-0.01 to 0.169	0.0833082	0.136099	0.078209	-0.013 to 0.171
CE(20:3)		0.00931828	-0.029 to 0.047	0.631476	0.864242	0.0100016	-0.036 to 0.046	-0.133914	-0.224 to -0.043	0.0039291	0.0096793	-0.132778	-0.221 to -0.044
CE(20:4)		-0.0383669	-0.076 to -0.001	0.0454402	0.282093	-0.0382569	-0.079 to 0.004	-0.311145	-0.396 to -0.226	3.6199e-12	2.3809e-10	-0.310768	-0.405 to -0.223
CE(20:5)		-0.0291965	-0.066 to 0.008	0.121784	0.476185	-0.0304744	-0.064 to 0.007	-0.283754	-0.368 to -0.2	1.12371e-10	3.488e-09	-0.285535	-0.363 to -0.197
CE(22:0)		0.0318659	-0.005 to 0.068	0.0867043	0.404381	0.0324786	-0.007 to 0.069	0.0784844	-0.009 to 0.166	0.0782307	0.128617	0.0790182	-0.005 to 0.163
CE(22:1)		0.00911248	-0.027 to 0.045	0.621087	0.857586	0.00983883	-0.025 to 0.043	0.100677	0.015 to 0.186	0.0217857	0.0429079	0.0984102	0.006 to 0.192
CE(22:4)		-0.015375	-0.054 to 0.024	0.439912	0.752532	-0.0151121	-0.061 to 0.027	-0.144772	-0.238 to -0.052	0.00235176	0.00610355	-0.145719	-0.242 to -0.033
CE(22:5) (n3)		-0.0626521	-0.1 to -0.025	0.001121	0.12733	-0.0626234	-0.101 to -0.023	-0.241924	-0.33 to -0.154	1.18956e-07	1.12573e-06	-0.242679	-0.328 to -0.139
CE(22:5) (n6)		-0.0229059	-0.061 to 0.015	0.23909	0.618445	-0.0241623	-0.058 to 0.021	-0.24391	-0.333 to -0.155	1.22803e-07	1.14813e-06	-0.244875	-0.337 to -0.155
CE(22:6)		-0.0634114	-0.101 to -0.026	0.000959831	0.12733	-0.0627952	-0.104 to -0.026	-0.247486	-0.335 to -0.16	5.47383e-08	5.74013e-07	-0.246084	-0.332 to -0.161
CE(24:0)		0.0131069	-0.023 to 0.049	0.474919	0.77775	0.013664	-0.021 to 0.05	0.0210245	-0.065 to 0.107	0.632913	0.719093	0.0215862	-0.063 to 0.093
CE(24:1)		0.0300888	-0.006 to 0.067	0.10762	0.441882	0.0303134	-0.01 to 0.065	0.0935568	0.006 to 0.181	0.0359676	0.0655185	0.0894067	0.009 to 0.188
CE(24:4)		0.0154377	-0.02 to 0.051	0.398462	0.736447	0.0161438	-0.019 to 0.051	-0.0312265	-0.116 to 0.054	0.470832	0.574475	-0.0308551	-0.129 to 0.063
CE(24:5)		-0.0254068	-0.063 to 0.012	0.180182	0.548678	-0.0255665	-0.063 to 0.012	-0.188503	-0.276 to -0.101	2.78136e-05	0.000124759	-0.188437	-0.287 to -0.093
CE(24:6)		-0.0122735	-0.051 to 0.027	0.536869	0.800914	-0.0128951	-0.051 to 0.029	-0.183342	-0.275 to -0.091	0.000108395	0.000418479	-0.186705	-0.274 to -0.089
COH		-0.00370502	-0.042 to 0.035	0.851082	0.953693	-0.00474587	-0.038 to 0.034	0.0586755	-0.034 to 0.151	0.214588	0.304982	0.0529089	-0.037 to 0.165
DE(16:0)		-0.0499877	-0.089 to -0.011	0.0122572	0.171347	-0.0492186	-0.088 to -0.008	-0.228337	-0.321 to -0.136	1.66973e-06	1.12671e-05	-0.231767	-0.318 to -0.133
DE(18:1)		-0.0236845	-0.062 to 0.015	0.230435	0.610752	-0.0234892	-0.061 to 0.016	-0.30699	-0.394 to -0.22	1.69712e-11	6.93139e-10	-0.307338	-0.394 to -0.219
DE(18:2)		-0.0739868	-0.114 to -0.034	0.000320856	0.124492	-0.0734551	-0.119 to -0.036	-0.407819	-0.497 to -0.319	8.67051e-18	6.72831e-15	-0.405473	-0.499 to -0.325
DE(20:4)		-0.0528683	-0.091 to -0.014	0.00726516	0.150871	-0.0521185	-0.094 to -0.009	-0.368295	-0.454 to -0.282	5.60904e-16	1.45087e-13	-0.368607	-0.471 to -0.287
DE(20:5)		-0.0430854	-0.081 to -0.005	0.0270211	0.232982	-0.0429015	-0.08 to -0.005	-0.252639	-0.341 to -0.164	4.30334e-08	4.75027e-07	-0.249765	-0.34 to -0.17
DE(22:6)		-0.066201	-0.102 to -0.03	0.00031596	0.124492	-0.0654829	-0.102 to -0.032	-0.314782	-0.397 to -0.233	2.58068e-13	2.86087e-11	-0.315132	-0.393 to -0.232
FA(14:0)		-0.0136802	-0.048 to 0.021	0.44069	0.752532	-0.0136968	-0.051 to 0.018	-0.0434727	-0.127 to 0.04	0.308636	0.407315	-0.0434828	-0.117 to 0.033
FA(15:0)		-0.0072256	-0.044 to 0.03	0.701679	0.889832	-0.00710964	-0.046 to 0.031	0.0107183	-0.078 to 0.099	0.813031	0.86783	0.00906459	-0.064 to 0.096
FA(16:0)		-0.00772837	-0.038 to 0.023	0.620319	0.857586	-0.00718371	-0.037 to 0.023	-0.033799	-0.107 to 0.04	0.368454	0.474951	-0.0347354	-0.096 to 0.034
FA(16:1)		-0.00535882	-0.04 to 0.029	0.758641	0.918838	-0.00568928	-0.039 to 0.03	-0.048866	-0.131 to 0.033	0.244254	0.339601	-0.0475263	-0.123 to 0.031
FA(16:2)		-0.0223041	-0.062 to 0.018	0.276726	0.65871	-0.0222572	-0.062 to 0.019	0.0341835	-0.063 to 0.131	0.48907	0.588462	0.033931	-0.068 to 0.138
FA(17:0)		-0.0191703	-0.059 to 0.02	0.341884	0.713656	-0.0198488	-0.062 to 0.02	-0.0629128	-0.158 to 0.032	0.194815	0.283102	-0.0619158	-0.147 to 0.02
FA(17:1)		0.011742	-0.026 to 0.049	0.538759	0.800914	0.0110493	-0.029 to 0.05	-0.0480214	-0.138 to 0.042	0.295373	0.393831	-0.0473323	-0.13 to 0.039
FA(18:0)		-0.0226156	-0.063 to 0.017	0.267686	0.65388	-0.0233112	-0.062 to 0.022	-0.0841457	-0.18 to 0.012	0.086522	0.141053	-0.0826044	-0.171 to -0.006
FA(18:1)		0.000103554	-0.034 to 0.034	0.995194	0.996478	2.0201e-05	-0.035 to 0.03	-0.0484394	-0.129 to 0.033	0.241951	0.337081	-0.0490585	-0.121 to 0.032
FA(18:2)		0.00497639	-0.027 to 0.037	0.759586	0.918838	0.00602404	-0.026 to 0.036	-0.00778641	-0.084 to 0.069	0.841851	0.883461	-0.00745405	-0.076 to 0.065
FA(18:3)		0.0140174	-0.018 to 0.046	0.395254	0.736447	0.0147259	-0.018 to 0.045	-0.0317202	-0.109 to 0.046	0.424261	0.531868	-0.0329545	-0.098 to 0.038
FA(20:2)		-0.0141861	-0.05 to 0.022	0.43809	0.752532	-0.0141035	-0.05 to 0.023	-0.100556	-0.186 to -0.015	0.0219486	0.0430103	-0.0995554	-0.176 to -0.022
FA(20:3)		0.00235877	-0.033 to 0.038	0.895909	0.965845	0.000546884	-0.03 to 0.043	-0.0864173	-0.171 to -0.002	0.0458323	0.0817606	-0.0862462	-0.16 to -0.006
FA(20:4)		-0.0211131	-0.056 to 0.014	0.238383	0.618445	-0.02099	-0.056 to 0.011	-0.0432862	-0.128 to 0.041	0.314437	0.413565	-0.0454241	-0.122 to 0.034
FA(20:5)		-0.0122485	-0.05 to 0.026	0.525782	0.793336	-0.0135468	-0.047 to 0.03	-0.1054	-0.196 to -0.015	0.0223297	0.043647	-0.107768	-0.194 to -0.021
FA(22:4)		-0.0184761	-0.055 to 0.018	0.3189	0.689322	-0.0194827	-0.054 to 0.018	-0.118614	-0.205 to -0.032	0.007627	0.0175105	-0.119245	-0.2 to -0.042
FA(22:5)		-0.0229934	-0.057 to 0.011	0.188591	0.554064	-0.023574	-0.055 to 0.012	-0.126114	-0.208 to -0.045	0.00257048	0.00658315	-0.125752	-0.199 to -0.049
FA(22:6)		-0.0455201	-0.077 to -0.014	0.00535077	0.150871	-0.0448309	-0.078 to -0.017	-0.115257	-0.192 to -0.039	0.00330981	0.00828519	-0.115004	-0.199 to -0.045
AC(12:0)		-0.0232988	-0.062 to 0.015	0.234376	0.610752	-0.02266	-0.064 to 0.016	-0.0430144	-0.135 to 0.049	0.362336	0.468622	-0.0448291	-0.133 to 0.064
AC(13:0)		-0.0265267	-0.063 to 0.01	0.151873	0.514646	-0.0270251	-0.062 to 0.008	-0.0296405	-0.117 to 0.058	0.50615	0.608007	-0.027935	-0.117 to 0.052
AC(14:0)		-0.0333449	-0.064 to -0.003	0.0319708	0.2506	-0.0327751	-0.068 to -0.004	-0.085037	-0.158 to -0.012	0.0228417	0.044424	-0.0822262	-0.151 to -0.013
AC(14:1)		-0.00392137	-0.042 to 0.034	0.841503	0.950519	-0.00365311	-0.041 to 0.035	-0.0338312	-0.126 to 0.059	0.473903	0.575902	-0.0329055	-0.125 to 0.062
AC(14:2)		0.00597798	-0.032 to 0.044	0.760755	0.918838	0.00634134	-0.03 to 0.045	-0.0115516	-0.104 to 0.081	0.806958	0.863724	-0.00907565	-0.108 to 0.08
AC(15:0) (a)		-0.0151678	-0.05 to 0.02	0.397532	0.736447	-0.0161721	-0.051 to 0.025	-0.0840457	-0.167 to -0.001	0.0487913	0.08605	-0.0825734	-0.164 to -0.001
AC(15:0) (b)		-0.0133786	-0.043 to 0.017	0.381199	0.732001	-0.0138447	-0.048 to 0.02	-0.0852909	-0.156 to -0.014	0.0192476	0.0387951	-0.0837515	-0.155 to -0.015
AC(16:0)		-0.019638	-0.045 to 0.006	0.127549	0.483218	-0.0192871	-0.05 to 0.005	-0.109407	-0.169 to -0.049	0.000383443	0.00130505	-0.108376	-0.166 to -0.051
AC(16:1)		-0.0247232	-0.055 to 0.005	0.106777	0.441882	-0.024385	-0.06 to 0.007	-0.0830198	-0.155 to -0.011	0.0244472	0.0473092	-0.0834659	-0.154 to -0.008
AC(17:0) (a)		-0.00449831	-0.036 to 0.027	0.776512	0.927176	-0.00493985	-0.036 to 0.029	-0.105852	-0.179 to -0.033	0.00478911	0.0115774	-0.104215	-0.19 to -0.038
AC(17:0) (b)		-0.00965154	-0.039 to 0.02	0.521058	0.793237	-0.0105413	-0.041 to 0.021	-0.125547	-0.195 to -0.056	0.000426571	0.00143295	-0.125207	-0.197 to -0.051
AC(18:0)		-0.0196735	-0.047 to 0.008	0.157581	0.52708	-0.0191651	-0.051 to 0.007	-0.143948	-0.208 to -0.08	1.41024e-05	7.0723e-05	-0.141526	-0.218 to -0.077
AC(18:1)		-0.0150543	-0.039 to 0.009	0.219344	0.601452	-0.0130822	-0.059 to 0.01	-0.08027	-0.137 to -0.023	0.00610341	0.0141804	-0.0784041	-0.137 to -0.029
AC(18:2)		-0.00661161	-0.029 to 0.015	0.556714	0.820071	-0.00603933	-0.04 to 0.017	-0.0733936	-0.126 to -0.021	0.00616543	0.0142817	-0.0742485	-0.124 to -0.029
DG(14:0_16:0)		0.00344977	-0.037 to 0.044	0.866274	0.955961	0.00236895	-0.039 to 0.054	0.124874	0.029 to 0.221	0.011016	0.0241648	0.125761	0.032 to 0.214
DG(14:0_18:2)		0.0199554	-0.019 to 0.059	0.31109	0.68283	0.0190529	-0.02 to 0.063	0.202988	0.112 to 0.294	1.41264e-05	7.0723e-05	0.2071	0.106 to 0.282
DG(16:0_16:0)		0.00748128	-0.031 to 0.046	0.706773	0.889832	0.0079304	-0.038 to 0.054	0.180718	0.088 to 0.273	0.000141215	0.000529384	0.180223	0.093 to 0.267
DG(16:0_16:1)		0.0048045	-0.033 to 0.043	0.804919	0.933658	0.00511578	-0.041 to 0.048	0.155015	0.065 to 0.245	0.000828707	0.00244954	0.155748	0.064 to 0.247
DG(16:0_18:1)		0.0133468	-0.024 to 0.05	0.480565	0.77775	0.0139985	-0.031 to 0.054	0.25357	0.168 to 0.34	1.40444e-08	2.09586e-07	0.254579	0.173 to 0.346
DG(16:0_18:2)		0.0253857	-0.011 to 0.062	0.170559	0.542435	0.0262115	-0.009 to 0.063	0.288778	0.206 to 0.371	2.36812e-11	9.13643e-10	0.289268	0.198 to 0.363
DG(16:0_20:4)		0.0044537	-0.032 to 0.041	0.809788	0.934875	0.00447251	-0.035 to 0.045	0.227599	0.143 to 0.312	2.19371e-07	1.93445e-06	0.22583	0.141 to 0.317
DG(16:0_22:5)		0.00132361	-0.036 to 0.039	0.944595	0.976354	0.000496121	-0.035 to 0.043	0.169177	0.081 to 0.258	0.000203755	0.000728637	0.168082	0.085 to 0.258
DG(16:0_22:6)		-0.0390354	-0.073 to -0.005	0.0256694	0.226357	-0.03793	-0.074 to -0.007	0.16636	0.085 to 0.247	6.63534e-05	0.000268178	0.167883	0.088 to 0.249
DG(16:1_18:1)		0.0296772	-0.009 to 0.068	0.129865	0.485581	0.0281954	-0.015 to 0.073	0.23011	0.14 to 0.32	7.28002e-07	5.33039e-06	0.230108	0.145 to 0.333
DG(18:0_18:1)		0.0387356	0.001 to 0.076	0.0432838	0.275024	0.039494	-0.005 to 0.08	0.282632	0.196 to 0.369	3.69599e-10	7.96692e-09	0.285776	0.198 to 0.368
DG(18:0_18:2)		0.0331063	-0.003 to 0.07	0.0768245	0.374942	0.0343915	-0.003 to 0.075	0.298677	0.215 to 0.382	8.69127e-12	4.21526e-10	0.298719	0.216 to 0.379
DG(18:0_20:4)		0.0231898	-0.008 to 0.054	0.143263	0.49191	0.0243351	-0.017 to 0.055	0.256425	0.185 to 0.327	5.58086e-12	2.88717e-10	0.25574	0.186 to 0.328
DG(18:0_22:6)		0.00203194	-0.03 to 0.034	0.899879	0.965845	0.00168837	-0.027 to 0.029	0.0835783	0.008 to 0.16	0.0316946	0.0588398	0.081866	0.012 to 0.158
DG(18:1_18:1)		0.0396226	0.001 to 0.078	0.0434641	0.275024	0.0387616	-0.001 to 0.079	0.304809	0.217 to 0.392	2.98484e-11	1.05284e-09	0.306162	0.223 to 0.39
DG(18:1_18:2)		0.0434014	0.006 to 0.081	0.025137	0.226357	0.0454974	0.004 to 0.078	0.303641	0.218 to 0.389	1.36067e-11	5.86599e-10	0.305368	0.228 to 0.378
DG(18:1_18:3)		0.054493	0.017 to 0.092	0.00412843	0.150871	0.0561464	0.015 to 0.09	0.241901	0.156 to 0.328	6.48399e-08	6.57656e-07	0.243156	0.165 to 0.321
DG(18:1_20:3)		0.0577771	0.021 to 0.094	0.00216513	0.12733	0.0573535	0.022 to 0.1	0.161994	0.074 to 0.25	0.000341729	0.00117858	0.16283	0.077 to 0.249
DG(18:1_20:4)		0.0371834	0.001 to 0.073	0.0436496	0.275024	0.0379734	-0.001 to 0.067	0.29986	0.218 to 0.382	3.6818e-12	2.3809e-10	0.299837	0.226 to 0.378
DG(18:1_20:5)		0.0300222	-0.006 to 0.066	0.10455	0.440928	0.0292719	-0.007 to 0.063	0.159745	0.074 to 0.246	0.000303833	0.00106205	0.158205	0.07 to 0.248
DG(18:1_22:5)		0.0170994	-0.019 to 0.053	0.356752	0.721876	0.016	-0.017 to 0.054	0.245817	0.161 to 0.33	2.08378e-08	2.60809e-07	0.246497	0.155 to 0.32
DG(18:1_22:6)		-0.0217516	-0.056 to 0.013	0.214758	0.591739	-0.0198609	-0.056 to 0.01	0.205747	0.126 to 0.285	6.14671e-07	4.72262e-06	0.206099	0.13 to 0.28
DG(18:2_18:2)		0.0294018	-0.008 to 0.067	0.123342	0.476185	0.0310321	-0.011 to 0.065	0.226416	0.141 to 0.312	3.34751e-07	2.82355e-06	0.227067	0.151 to 0.304
DG(18:2_20:4)		0.0298692	-0.006 to 0.066	0.107623	0.441882	0.0302703	-0.006 to 0.063	0.23402	0.15 to 0.318	8.49343e-08	8.13692e-07	0.234585	0.153 to 0.314
DG(18:2_22:6)		-0.0217599	-0.057 to 0.013	0.226972	0.610752	-0.0211324	-0.056 to 0.011	0.193644	0.111 to 0.276	5.25026e-06	3.134e-05	0.193028	0.116 to 0.272
TG(48:0) [SIM]		0.00346439	-0.037 to 0.044	0.867264	0.955961	0.00352345	-0.04 to 0.047	0.0579721	-0.04 to 0.156	0.245253	0.339851	0.0591427	-0.039 to 0.163
TG(48:1) [SIM]		-0.0049134	-0.045 to 0.035	0.808111	0.934567	-0.00588715	-0.049 to 0.041	0.0618434	-0.033 to 0.157	0.202962	0.291664	0.0638277	-0.035 to 0.16
TG(48:2) [SIM]		0.0173546	-0.022 to 0.057	0.387282	0.736447	0.018103	-0.025 to 0.061	0.16456	0.072 to 0.258	0.000576846	0.00182707	0.165217	0.068 to 0.252
TG(48:3) [SIM]		0.0364104	-0.003 to 0.076	0.0707633	0.352002	0.0366641	-0.009 to 0.074	0.196763	0.104 to 0.29	3.98589e-05	0.000169948	0.199036	0.101 to 0.285
TG(49:1) [SIM]		-0.00878453	-0.049 to 0.032	0.671174	0.880051	-0.010161	-0.05 to 0.037	0.0359963	-0.061 to 0.133	0.4693	0.574412	0.0362864	-0.059 to 0.129
TG(50:0) [SIM]		0.0145272	-0.026 to 0.055	0.481513	0.77775	0.0142768	-0.031 to 0.056	0.157793	0.061 to 0.254	0.0014281	0.00394379	0.157663	0.064 to 0.257
TG(50:1) [SIM]		0.00715075	-0.034 to 0.049	0.735155	0.905524	0.00652235	-0.037 to 0.054	0.147441	0.049 to 0.246	0.00361766	0.00899777	0.145642	0.048 to 0.246
TG(50:2) [SIM]		0.0171518	-0.023 to 0.058	0.407557	0.736447	0.0159815	-0.022 to 0.059	0.163292	0.067 to 0.26	0.000973081	0.0028071	0.163398	0.07 to 0.262
TG(50:3) [SIM]		0.0282599	-0.011 to 0.068	0.163826	0.534156	0.0270602	-0.01 to 0.068	0.233349	0.14 to 0.327	1.28494e-06	9.16339e-06	0.234003	0.139 to 0.324
TG(50:4) [SIM]		0.0411661	0.002 to 0.08	0.0398064	0.268607	0.0419685	0.002 to 0.076	0.269646	0.179 to 0.361	1.16864e-08	1.81373e-07	0.268914	0.185 to 0.365
TG(51:0) [SIM]		0.00441332	-0.035 to 0.044	0.8283	0.942464	0.00396546	-0.035 to 0.046	-0.0035931	-0.1 to 0.093	0.941639	0.9602	-0.0024749	-0.087 to 0.088
TG(51:1) [SIM]		0.0194305	-0.021 to 0.06	0.343953	0.713656	0.0187293	-0.026 to 0.064	0.130405	0.034 to 0.226	0.00806223	0.0184551	0.131066	0.025 to 0.222
TG(51:2) [SIM]		0.0155898	-0.024 to 0.055	0.439962	0.752532	0.0151692	-0.026 to 0.058	0.158871	0.065 to 0.253	0.00100014	0.00287448	0.158069	0.068 to 0.257
TG(52:1) [SIM]		0.0267063	-0.014 to 0.067	0.19442	0.560855	0.026549	-0.019 to 0.072	0.232535	0.138 to 0.327	2.14087e-06	1.39606e-05	0.232371	0.127 to 0.325
TG(52:2) [SIM]		0.0433263	0.002 to 0.084	0.0382867	0.268607	0.0430155	-0.001 to 0.083	0.239057	0.143 to 0.335	1.62929e-06	1.11888e-05	0.239661	0.145 to 0.328
TG(52:3) [SIM]		0.042942	0.002 to 0.084	0.0396165	0.268607	0.0434382	-0.001 to 0.081	0.237051	0.141 to 0.333	1.88148e-06	1.23731e-05	0.239183	0.149 to 0.319
TG(52:4) [SIM]		0.0456031	0.006 to 0.085	0.0238529	0.225639	0.0461488	0.012 to 0.079	0.286638	0.195 to 0.378	1.83058e-09	3.55133e-08	0.288238	0.192 to 0.375
TG(52:5) [SIM]		0.0508971	0.013 to 0.089	0.00897942	0.155477	0.0506538	0.016 to 0.086	0.292686	0.205 to 0.38	1.50905e-10	4.03801e-09	0.29449	0.206 to 0.362
TG(53:2) [SIM]		0.0402114	0.001 to 0.079	0.0425912	0.275024	0.0397178	-0.004 to 0.085	0.223213	0.132 to 0.315	2.3129e-06	1.48331e-05	0.225288	0.121 to 0.314
TG(54:0) [SIM]		0.0253094	-0.015 to 0.066	0.22223	0.606126	0.0248536	-0.02 to 0.071	0.138482	0.041 to 0.236	0.00544899	0.0129309	0.140152	0.05 to 0.239
TG(54:1) [SIM]		0.0451917	0.005 to 0.085	0.026487	0.230943	0.0454666	0.002 to 0.089	0.208785	0.114 to 0.303	1.8552e-05	8.88663e-05	0.213579	0.1 to 0.291
TG(54:2) [SIM]		0.056514	0.018 to 0.095	0.0042731	0.150871	0.0576385	0.016 to 0.098	0.310869	0.222 to 0.4	2.47249e-11	9.13643e-10	0.308994	0.224 to 0.402
TG(54:3) [SIM]		0.0551772	0.016 to 0.094	0.00565607	0.150871	0.0571905	0.013 to 0.09	0.215908	0.124 to 0.307	4.8793e-06	2.95807e-05	0.218811	0.131 to 0.298
TG(54:4) [SIM]		0.0609264	0.022 to 0.1	0.0021211	0.12733	0.0628004	0.024 to 0.099	0.197756	0.106 to 0.289	2.77301e-05	0.000124759	0.198639	0.114 to 0.282
TG(54:5) [SIM]		0.0617043	0.023 to 0.1	0.00182646	0.12733	0.0621372	0.028 to 0.099	0.215967	0.125 to 0.307	4.22089e-06	2.59953e-05	0.217539	0.127 to 0.301
TG(54:6) [SIM]		0.0514475	0.013 to 0.09	0.00837374	0.151117	0.0515412	0.014 to 0.09	0.221012	0.132 to 0.31	1.65458e-06	1.12628e-05	0.223957	0.135 to 0.305
TG(54:7) [SIM]		0.0499262	0.013 to 0.087	0.00816569	0.150871	0.0490307	0.013 to 0.086	0.239567	0.153 to 0.326	8.33189e-08	8.08193e-07	0.239518	0.165 to 0.329
TG(56:6) [SIM]		0.0240951	-0.014 to 0.062	0.215039	0.591739	0.0253151	-0.012 to 0.06	0.207345	0.117 to 0.297	7.86816e-06	4.25804e-05	0.209298	0.12 to 0.295
TG(56:7) [SIM]		-0.00334777	-0.04 to 0.033	0.857019	0.953693	-0.00215776	-0.038 to 0.032	0.221214	0.136 to 0.306	5.08552e-07	4.07652e-06	0.222874	0.132 to 0.305
TG(56:8) [SIM]		0.0121429	-0.025 to 0.049	0.516893	0.791142	0.0127424	-0.026 to 0.046	0.262012	0.178 to 0.346	2.41635e-09	4.41997e-08	0.262344	0.175 to 0.34
TG(56:9) [SIM]		0.0468415	0.009 to 0.085	0.0162222	0.19007	0.0471404	0.006 to 0.084	0.212346	0.123 to 0.302	4.70556e-06	2.87521e-05	0.212873	0.125 to 0.297
TG(58:10) [SIM]		0.00656254	-0.029 to 0.043	0.721366	0.90287	0.00675985	-0.03 to 0.045	0.162373	0.077 to 0.248	0.0002187	0.000774937	0.162989	0.082 to 0.244
TG(58:8) [SIM]		-0.000639737	-0.037 to 0.036	0.972502	0.985726	-0.000153775	-0.034 to 0.034	0.178852	0.093 to 0.265	5.20607e-05	0.000214889	0.181121	0.092 to 0.264
TG(58:9) [SIM]		0.00735455	-0.029 to 0.044	0.693764	0.888561	0.00821611	-0.028 to 0.041	0.197925	0.112 to 0.284	7.90152e-06	4.25804e-05	0.196704	0.126 to 0.287
TG(48:0) [NL-16:0]		-0.000692437	-0.041 to 0.039	0.973023	0.985726	-0.000297551	-0.047 to 0.042	0.0733148	-0.023 to 0.17	0.136748	0.210549	0.0727061	-0.024 to 0.17
TG(48:0) [NL-18:0]		0.001407	-0.039 to 0.042	0.946008	0.976354	0.000868944	-0.042 to 0.047	0.0255891	-0.072 to 0.124	0.608917	0.699499	0.0269269	-0.064 to 0.121
TG(48:1) [NL-16:1]		-0.0147418	-0.054 to 0.024	0.460546	0.771734	-0.0159849	-0.056 to 0.036	-0.000172873	-0.094 to 0.094	0.997123	0.997909	-0.00111406	-0.101 to 0.086
TG(48:1) [NL-18:1]		-0.0022798	-0.042 to 0.037	0.909833	0.971722	-0.00327307	-0.04 to 0.042	0.087913	-0.007 to 0.182	0.0688022	0.115564	0.0872171	-0.013 to 0.187
TG(48:2) [NL-14:0]		0.0186007	-0.021 to 0.059	0.361784	0.721876	0.0190608	-0.028 to 0.058	0.191027	0.097 to 0.286	8.63052e-05	0.000339964	0.19343	0.094 to 0.281
TG(48:2) [NL-14:1]		0.000899951	-0.04 to 0.042	0.965373	0.983109	-0.0020304	-0.039 to 0.048	0.137313	0.04 to 0.234	0.00572945	0.0134729	0.135724	0.042 to 0.232
TG(48:2) [NL-16:1]		-0.00419813	-0.043 to 0.035	0.833025	0.946453	-0.00675596	-0.044 to 0.045	0.0641005	-0.029 to 0.158	0.17955	0.266407	0.0657133	-0.037 to 0.17
TG(48:2) [NL-18:2]		0.0275659	-0.013 to 0.068	0.180321	0.548678	0.0266547	-0.014 to 0.068	0.19322	0.098 to 0.289	8.23068e-05	0.000325868	0.196313	0.103 to 0.29
TG(48:3) [NL-14:0]		0.026933	-0.013 to 0.067	0.184208	0.551914	0.0278305	-0.021 to 0.062	0.198133	0.104 to 0.292	4.24763e-05	0.000179139	0.200339	0.105 to 0.285
TG(48:3) [NL-16:1]		0.0168928	-0.023 to 0.057	0.41135	0.736447	0.0157846	-0.033 to 0.058	0.150634	0.055 to 0.247	0.00221618	0.00577098	0.151699	0.052 to 0.245
TG(48:3) [NL-18:3]		0.0281048	-0.012 to 0.068	0.167137	0.53861	0.0271712	-0.018 to 0.071	0.167683	0.073 to 0.262	0.000576154	0.00182707	0.167095	0.074 to 0.27
TG(49:1) [NL-16:1]		-0.0029584	-0.043 to 0.037	0.884713	0.962098	-0.00296793	-0.042 to 0.038	-0.0705961	-0.166 to 0.025	0.148918	0.22659	-0.0722675	-0.155 to 0.017
TG(49:1) [NL-17:1]		-0.00380863	-0.044 to 0.036	0.85291	0.953693	-0.00522207	-0.045 to 0.047	0.0577665	-0.039 to 0.154	0.241606	0.337081	0.0578899	-0.037 to 0.157
TG(50:0) [NL-18:0]		0.0159365	-0.024 to 0.056	0.438451	0.752532	0.0160856	-0.028 to 0.06	0.147064	0.051 to 0.243	0.00287499	0.00722003	0.147288	0.049 to 0.253
TG(50:1) [NL-14:0]		0.00947402	-0.031 to 0.05	0.647347	0.87212	0.00946795	-0.037 to 0.057	0.0591701	-0.038 to 0.157	0.234623	0.329067	0.0608077	-0.041 to 0.153
TG(50:1) [NL-16:0]		0.010141	-0.031 to 0.052	0.631212	0.864242	0.0107946	-0.036 to 0.052	0.155888	0.057 to 0.255	0.00207448	0.00553009	0.155358	0.054 to 0.255
TG(50:1) [NL-18:1]		0.00148928	-0.04 to 0.043	0.943672	0.976354	0.000877843	-0.049 to 0.05	0.133603	0.035 to 0.232	0.00822589	0.0186665	0.134435	0.037 to 0.23
TG(50:2) [NL-14:0]		0.0126943	-0.026 to 0.051	0.515841	0.791142	0.0119876	-0.023 to 0.048	0.162582	0.072 to 0.253	0.000464299	0.00152668	0.164596	0.068 to 0.254
TG(50:2) [NL-16:1]		0.00128192	-0.037 to 0.039	0.94737	0.976354	0.000359375	-0.039 to 0.039	0.0872997	-0.004 to 0.178	0.0602536	0.103444	0.0873889	-0.005 to 0.188
TG(50:2) [NL-18:1]		0.00297523	-0.035 to 0.041	0.879145	0.962098	0.00234574	-0.037 to 0.045	0.12827	0.037 to 0.219	0.00599865	0.0139788	0.128686	0.026 to 0.221
TG(50:2) [NL-18:2]		0.018869	-0.023 to 0.06	0.37212	0.729493	0.0192722	-0.022 to 0.064	0.151701	0.053 to 0.25	0.00275244	0.00693472	0.151756	0.043 to 0.25
TG(50:3) [NL-14:0]		0.0297724	-0.009 to 0.069	0.135375	0.488656	0.0311351	-0.008 to 0.064	0.245215	0.155 to 0.336	1.79e-07	1.5966e-06	0.243602	0.164 to 0.336
TG(50:3) [NL-14:1]		0.0177577	-0.023 to 0.058	0.389269	0.736447	0.0163175	-0.025 to 0.063	0.141512	0.045 to 0.238	0.00428082	0.0105124	0.142373	0.049 to 0.234
TG(50:3) [NL-16:1]		0.0204289	-0.018 to 0.059	0.300714	0.677292	0.0193154	-0.016 to 0.058	0.193791	0.103 to 0.285	3.78211e-05	0.00016215	0.194967	0.095 to 0.282
TG(50:3) [NL-18:2]		0.0271463	-0.012 to 0.067	0.177927	0.548452	0.0281002	-0.012 to 0.066	0.281788	0.191 to 0.372	2.44921e-09	4.41997e-08	0.283001	0.194 to 0.362
TG(50:3) [NL-18:3]		0.0288666	-0.012 to 0.07	0.16789	0.53861	0.0286532	-0.009 to 0.071	0.187201	0.09 to 0.285	0.000185967	0.00067121	0.185646	0.088 to 0.286
TG(50:4) [NL-14:0]		0.0458414	0.007 to 0.085	0.021377	0.215436	0.0462158	0.008 to 0.082	0.257767	0.167 to 0.348	4.34626e-08	4.75027e-07	0.258591	0.179 to 0.348
TG(50:4) [NL-18:3]		0.0389767	-0.001 to 0.078	0.0538549	0.302836	0.0382011	0 to 0.077	0.23816	0.145 to 0.331	7.2812e-07	5.33039e-06	0.239718	0.145 to 0.332
TG(50:4) [NL-20:4]		0.00109164	-0.038 to 0.04	0.956658	0.979375	0.000327589	-0.038 to 0.042	0.202945	0.11 to 0.295	2.09116e-05	9.95548e-05	0.203472	0.111 to 0.289
TG(51:0) [NL-16:0]		0.0135303	-0.027 to 0.054	0.513717	0.791142	0.0126531	-0.031 to 0.059	0.137122	0.04 to 0.234	0.00577764	0.0135452	0.137877	0.042 to 0.233
TG(51:1) [NL-17:0]		0.0142797	-0.026 to 0.054	0.485269	0.778579	0.0127735	-0.029 to 0.062	0.160736	0.065 to 0.256	0.00102607	0.00292731	0.162321	0.07 to 0.255
TG(51:2) [NL-15:0]		0.0220955	-0.017 to 0.062	0.273495	0.657929	0.0212512	-0.018 to 0.066	0.14946	0.055 to 0.244	0.0020037	0.00538018	0.152508	0.057 to 0.24
TG(51:2) [NL-17:0]		0.0173238	-0.021 to 0.056	0.374695	0.729493	0.0153091	-0.02 to 0.058	0.123579	0.032 to 0.215	0.00822675	0.0186665	0.125311	0.025 to 0.216
TG(51:2) [NL-17:1]		0.0174518	-0.021 to 0.056	0.371138	0.729493	0.0150533	-0.021 to 0.062	0.12358	0.032 to 0.215	0.00822146	0.0186665	0.124868	0.029 to 0.217
TG(52:1) [NL-18:0]		0.0302413	-0.01 to 0.07	0.138047	0.488656	0.0299373	-0.016 to 0.074	0.220638	0.126 to 0.315	5.82105e-06	3.34823e-05	0.223012	0.124 to 0.32
TG(52:1) [NL-18:1]		0.0255136	-0.014 to 0.065	0.204419	0.578938	0.0230321	-0.013 to 0.076	0.23064	0.138 to 0.323	1.44847e-06	1.01262e-05	0.231591	0.128 to 0.32
TG(52:2) [NL-16:0]		0.0575153	0.017 to 0.098	0.00513969	0.150871	0.0571817	0.018 to 0.1	0.263794	0.17 to 0.358	6.67618e-08	6.64195e-07	0.264001	0.157 to 0.357
TG(52:2) [NL-18:2]		0.0412554	0 to 0.082	0.0480712	0.283412	0.0397659	0.003 to 0.089	0.209404	0.113 to 0.306	2.74475e-05	0.000124557	0.209734	0.118 to 0.305
TG(52:3) [NL-16:1]		0.0115288	-0.027 to 0.05	0.555977	0.820071	0.0102063	-0.028 to 0.049	0.0499133	-0.042 to 0.142	0.288192	0.388259	0.0522041	-0.045 to 0.144
TG(52:3) [NL-18:2]		0.0471779	0.007 to 0.087	0.0217493	0.216064	0.047623	0.006 to 0.087	0.246628	0.152 to 0.341	4.48659e-07	3.70382e-06	0.247618	0.151 to 0.336
TG(52:4) [NL-16:1]		0.0338391	-0.006 to 0.074	0.0960104	0.420927	0.0339252	-0.006 to 0.068	0.248134	0.155 to 0.341	2.69734e-07	2.32571e-06	0.252098	0.16 to 0.347
TG(52:4) [NL-18:2]		0.0381118	-0.001 to 0.077	0.0557549	0.308359	0.0395784	0.003 to 0.071	0.237496	0.146 to 0.329	5.09565e-07	4.07652e-06	0.240044	0.138 to 0.316
TG(52:4) [NL-18:3]		0.0537868	0.015 to 0.093	0.00749694	0.150871	0.0531658	0.017 to 0.093	0.270652	0.179 to 0.363	1.48876e-08	2.13941e-07	0.271288	0.174 to 0.355
TG(52:5) [NL-18:3]		0.0477206	0.01 to 0.085	0.0134276	0.172521	0.0474079	0.013 to 0.082	0.288196	0.201 to 0.375	2.01987e-10	5.22472e-09	0.289034	0.208 to 0.373
TG(52:5) [NL-20:4]		0.0101044	-0.029 to 0.049	0.611715	0.856135	0.00782928	-0.028 to 0.053	0.254631	0.164 to 0.345	6.04744e-08	6.25708e-07	0.25504	0.157 to 0.35
TG(52:5) [NL-20:5]		0.00840424	-0.032 to 0.049	0.683019	0.884847	0.00737134	-0.035 to 0.053	0.115595	0.019 to 0.212	0.0190041	0.0385044	0.114354	0.015 to 0.22
TG(53:2) [NL-17:1]		0.0346654	-0.005 to 0.074	0.0875979	0.404381	0.0337565	-0.013 to 0.08	0.199523	0.106 to 0.293	3.75138e-05	0.000161726	0.19942	0.107 to 0.291
TG(53:2) [NL-18:1]		0.0418953	0.003 to 0.08	0.0338792	0.256299	0.0415729	0.005 to 0.086	0.234599	0.144 to 0.325	5.95133e-07	4.61823e-06	0.23671	0.138 to 0.321
TG(54:0) [NL-18:0]		0.0251421	-0.015 to 0.066	0.222855	0.606126	0.0238716	-0.015 to 0.072	0.120474	0.024 to 0.217	0.0151436	0.0317607	0.124488	0.02 to 0.213
TG(54:1) [NL-18:1]		0.048045	0.008 to 0.088	0.0189744	0.206658	0.0476208	0.008 to 0.101	0.214487	0.119 to 0.31	1.22228e-05	6.25484e-05	0.215818	0.114 to 0.307
TG(54:2) [NL-18:0]		0.0484001	0.009 to 0.088	0.0164107	0.19007	0.0492737	0.006 to 0.09	0.321458	0.231 to 0.412	1.27265e-11	5.80926e-10	0.323392	0.22 to 0.405
TG(54:2) [NL-20:1]		0.0382147	-0.001 to 0.077	0.0560292	0.308359	0.0376345	-0.002 to 0.078	0.295777	0.205 to 0.386	3.6252e-10	7.96692e-09	0.29623	0.203 to 0.388
TG(54:3) [NL-18:1]		0.044122	0.004 to 0.084	0.030509	0.242431	0.044639	0.004 to 0.08	0.166067	0.072 to 0.26	0.000607441	0.0019084	0.166739	0.075 to 0.26
TG(54:3) [NL-18:2]		0.0563049	0.018 to 0.094	0.00397775	0.150871	0.0563059	0.023 to 0.095	0.295097	0.207 to 0.383	1.45171e-10	4.02331e-09	0.294521	0.203 to 0.371
TG(54:4) [NL-18:2]		0.0484388	0.01 to 0.087	0.0150768	0.182807	0.0483307	0.011 to 0.086	0.211299	0.12 to 0.303	7.55633e-06	4.15866e-05	0.21362	0.122 to 0.299
TG(54:4) [NL-20:3]		0.0480621	0.01 to 0.086	0.0126431	0.171347	0.0473496	0.012 to 0.089	0.187689	0.098 to 0.277	4.83081e-05	0.000201543	0.188775	0.099 to 0.269
TG(54:5) [NL-18:3]		0.0560988	0.018 to 0.095	0.00458798	0.150871	0.0567266	0.022 to 0.093	0.206601	0.115 to 0.298	1.12054e-05	5.79694e-05	0.207346	0.125 to 0.287
TG(54:5) [NL-20:4]		0.0261615	-0.013 to 0.065	0.188915	0.554064	0.0262602	-0.01 to 0.063	0.307835	0.218 to 0.397	5.05994e-11	1.70718e-09	0.307152	0.215 to 0.397
TG(54:6) [NL-18:3]		0.060424	0.023 to 0.098	0.00181968	0.12733	0.0616045	0.025 to 0.095	0.2075	0.119 to 0.296	5.8441e-06	3.34823e-05	0.206605	0.13 to 0.288
TG(54:6) [NL-20:4]		0.0432925	0.004 to 0.082	0.0299843	0.242431	0.0441988	0.007 to 0.08	0.326699	0.237 to 0.416	3.26485e-12	2.3809e-10	0.327089	0.23 to 0.414
TG(54:6) [NL-20:5]		0.0174122	-0.021 to 0.056	0.371871	0.729493	0.0157192	-0.019 to 0.055	0.132888	0.042 to 0.224	0.00435131	0.0106183	0.132621	0.029 to 0.23
TG(54:6) [NL-22:6]		-0.0399129	-0.076 to -0.004	0.0306153	0.242431	-0.0407062	-0.076 to -0.004	0.140839	0.055 to 0.227	0.00139831	0.00387531	0.13909	0.057 to 0.229
TG(54:7) [NL-20:5]		0.0341026	-0.005 to 0.073	0.0864354	0.404381	0.0330516	-0.007 to 0.077	0.254335	0.163 to 0.345	7.13538e-08	7.00893e-07	0.25543	0.168 to 0.346
TG(54:7) [NL-22:6]		-0.0169718	-0.053 to 0.019	0.361868	0.721876	-0.0168419	-0.051 to 0.019	0.243782	0.16 to 0.328	2.5666e-08	3.09231e-07	0.244853	0.157 to 0.322
TG(56:6) [NL-20:4]		0.0499119	0.012 to 0.088	0.0099674	0.157851	0.050875	0.015 to 0.088	0.20726	0.118 to 0.297	7.68609e-06	4.20029e-05	0.207457	0.112 to 0.294
TG(56:6) [NL-22:5](a)		0.014294	-0.022 to 0.051	0.441582	0.752532	0.0135967	-0.016 to 0.053	0.15343	0.067 to 0.24	0.000545862	0.00176038	0.153164	0.066 to 0.252
TG(56:6) [NL-22:5](b)		0.0138929	-0.023 to 0.05	0.455087	0.767712	0.0137136	-0.023 to 0.047	0.155628	0.069 to 0.242	0.000462584	0.00152668	0.15869	0.058 to 0.246
TG(56:7) [NL-20:4]		0.0410292	0.002 to 0.08	0.0390852	0.268607	0.0415583	0.004 to 0.077	0.195247	0.103 to 0.287	3.67855e-05	0.000159472	0.193564	0.11 to 0.288
TG(56:7) [NL-20:5]		0.027503	-0.01 to 0.065	0.148542	0.505563	0.0269821	-0.009 to 0.068	0.129161	0.04 to 0.218	0.00480785	0.0115866	0.128196	0.04 to 0.222
TG(56:7) [NL-22:5](a)		0.0215431	-0.016 to 0.059	0.257094	0.644452	0.021441	-0.014 to 0.056	0.251938	0.165 to 0.339	2.59021e-08	3.09231e-07	0.252738	0.161 to 0.343
TG(56:7) [NL-22:5](b)		0.0214296	-0.016 to 0.059	0.259704	0.646511	0.0222739	-0.012 to 0.056	0.252757	0.166 to 0.34	2.33102e-08	2.87122e-07	0.254788	0.165 to 0.345
TG(56:7) [NL-22:6]		-0.0231255	-0.056 to 0.01	0.173159	0.548315	-0.0231757	-0.054 to 0.013	0.17753	0.1 to 0.255	1.00168e-05	5.21682e-05	0.178752	0.096 to 0.257
TG(56:8) [NL-20:4]		0.0426154	0.005 to 0.08	0.0278846	0.237785	0.0438791	0.006 to 0.081	0.235838	0.147 to 0.324	2.77682e-07	2.36792e-06	0.236709	0.155 to 0.317
TG(56:8) [NL-20:5]		0.041404	0.003 to 0.08	0.0368158	0.267001	0.0402072	0.007 to 0.08	0.204607	0.113 to 0.296	1.4682e-05	7.25686e-05	0.201169	0.118 to 0.295
TG(56:8) [NL-22:6]		-0.00481718	-0.04 to 0.03	0.787202	0.93157	-0.0041969	-0.036 to 0.03	0.272518	0.193 to 0.352	5.65392e-11	1.8281e-09	0.272693	0.193 to 0.354
TG(56:9) [NL-22:6]		-0.000877443	-0.037 to 0.036	0.962409	0.98267	-0.000297652	-0.037 to 0.034	0.245551	0.161 to 0.33	2.02245e-08	2.57282e-07	0.24488	0.167 to 0.326
TG(58:10) [NL-22:6]		0.0050945	-0.031 to 0.041	0.782723	0.930158	0.0058583	-0.03 to 0.041	0.243089	0.16 to 0.326	1.98466e-08	2.56682e-07	0.241498	0.17 to 0.325
TG(58:8) [NL-22:6]		-0.00702928	-0.044 to 0.03	0.707508	0.889832	-0.00588717	-0.045 to 0.027	0.238291	0.153 to 0.323	6.52571e-08	6.57656e-07	0.236212	0.157 to 0.327
TG(58:9) [NL-22:6]		0.00463463	-0.032 to 0.041	0.801643	0.933658	0.00632795	-0.03 to 0.038	0.218489	0.135 to 0.302	4.75982e-07	3.88802e-06	0.220499	0.143 to 0.303
TG(O-50:1) [SIM]		-0.0135987	-0.052 to 0.025	0.48613	0.778579	-0.0144247	-0.054 to 0.03	0.0128901	-0.079 to 0.105	0.784252	0.847604	0.013308	-0.076 to 0.11
TG(O-50:2) [SIM]		-0.013575	-0.052 to 0.025	0.489648	0.778621	-0.0132454	-0.051 to 0.024	-0.123445	-0.215 to -0.032	0.00879275	0.0198348	-0.122561	-0.213 to -0.042
TG(O-50:3) [SIM]		-0.0176247	-0.058 to 0.023	0.395234	0.736447	-0.0191689	-0.057 to 0.026	-0.152546	-0.25 to -0.056	0.0021723	0.00571053	-0.152467	-0.243 to -0.053
TG(O-52:0) [SIM]		0.0159906	-0.024 to 0.056	0.432116	0.752532	0.0174169	-0.031 to 0.071	-0.000156959	-0.097 to 0.096	0.997458	0.997909	0.00225764	-0.093 to 0.113
TG(O-52:1) [SIM]		0.00200328	-0.034 to 0.038	0.913641	0.97259	0.00212668	-0.035 to 0.048	-0.00792371	-0.095 to 0.079	0.858852	0.896997	-0.00688174	-0.104 to 0.085
TG(O-52:2) [SIM]		-0.00653894	-0.043 to 0.03	0.726921	0.903991	-0.00774767	-0.047 to 0.034	0.0466612	-0.042 to 0.135	0.301247	0.398921	0.0463508	-0.045 to 0.135
TG(O-54:2) [SIM]		-0.00308979	-0.037 to 0.031	0.859176	0.95382	-0.00356293	-0.041 to 0.033	-0.0156398	-0.098 to 0.067	0.709956	0.785914	-0.0152112	-0.096 to 0.084
TG(O-54:3) [SIM]		-0.017361	-0.055 to 0.02	0.367705	0.729493	-0.0178559	-0.054 to 0.017	-0.0395454	-0.131 to 0.052	0.397645	0.505039	-0.038753	-0.13 to 0.048
TG(O-54:4) [SIM]		0.0130299	-0.027 to 0.054	0.52855	0.793336	0.0118199	-0.028 to 0.066	0.11018	0.013 to 0.207	0.0267055	0.0510431	0.112938	0.015 to 0.208
TG(O-50:1) [NL-15:0]		0.00864335	-0.031 to 0.048	0.668714	0.880051	0.00845577	-0.032 to 0.058	0.0280809	-0.067 to 0.123	0.563379	0.661039	0.0281717	-0.06 to 0.151
TG(O-50:1) [NL-16:0]		-0.0136967	-0.053 to 0.026	0.498155	0.784114	-0.0144108	-0.056 to 0.038	0.0278163	-0.067 to 0.123	0.567459	0.664176	0.0289564	-0.067 to 0.132
TG(O-50:1) [NL-17:1]		0.00749837	-0.034 to 0.049	0.720906	0.90287	0.00607246	-0.041 to 0.054	0.0679242	-0.031 to 0.167	0.178607	0.265515	0.069072	-0.021 to 0.178
TG(O-50:1) [NL-18:1]		-0.0114488	-0.049 to 0.026	0.547215	0.81038	-0.0110451	-0.059 to 0.029	0.00337152	-0.086 to 0.093	0.941362	0.9602	0.00363287	-0.089 to 0.112
TG(O-50:2) [NL-16:1]		-0.00300328	-0.042 to 0.036	0.879919	0.962098	-0.00284785	-0.044 to 0.035	-0.115107	-0.208 to -0.022	0.0157539	0.0327749	-0.114088	-0.201 to -0.027
TG(O-50:2) [NL-18:1]		-0.0364702	-0.071 to -0.002	0.037811	0.268607	-0.0370382	-0.067 to -0.002	-0.108701	-0.191 to -0.027	0.00962672	0.0215284	-0.109569	-0.191 to -0.021
TG(O-50:2) [NL-18:2]		-0.0132296	-0.05 to 0.023	0.479683	0.77775	-0.013736	-0.049 to 0.022	-0.00893633	-0.097 to 0.079	0.842131	0.883461	-0.013843	-0.104 to 0.079
TG(O-50:3) [NL-18:2]		-0.0216071	-0.059 to 0.016	0.260685	0.646511	-0.0213456	-0.061 to 0.015	-0.15482	-0.243 to -0.067	0.000623512	0.00195099	-0.152327	-0.253 to -0.065
TG(O-52:0) [NL-16:0]		0.00756703	-0.031 to 0.046	0.701629	0.889832	0.00795264	-0.037 to 0.06	0.00960652	-0.083 to 0.102	0.839362	0.883461	0.0130528	-0.085 to 0.116
TG(O-52:1) [NL-16:0]		0.00484941	-0.033 to 0.043	0.801829	0.933658	0.00402162	-0.035 to 0.055	0.014002	-0.077 to 0.105	0.763062	0.830486	0.0150203	-0.082 to 0.109
TG(O-52:1) [NL-18:1]		-0.00666478	-0.043 to 0.029	0.715842	0.898856	-0.00795893	-0.042 to 0.036	-0.0091821	-0.096 to 0.077	0.835049	0.8821	-0.00885762	-0.097 to 0.086
TG(O-52:2) [NL-16:0]		-0.0143736	-0.05 to 0.022	0.433041	0.752532	-0.0147373	-0.052 to 0.023	0.0120735	-0.074 to 0.098	0.783865	0.847604	0.0120973	-0.074 to 0.098
TG(O-52:2) [NL-17:1]		-0.010074	-0.046 to 0.026	0.584401	0.833631	-0.0100789	-0.05 to 0.03	0.0345777	-0.052 to 0.121	0.435232	0.540384	0.0363052	-0.06 to 0.116
TG(O-52:2) [NL-18:1]		-0.0222543	-0.057 to 0.012	0.209854	0.589776	-0.0226227	-0.058 to 0.013	-0.0218739	-0.106 to 0.062	0.6085	0.699499	-0.0228821	-0.101 to 0.064
TG(O-54:2) [NL-17:1]		-0.0150139	-0.049 to 0.019	0.392302	0.736447	-0.0153327	-0.05 to 0.026	-0.000864535	-0.084 to 0.082	0.983698	0.990078	-0.00127931	-0.086 to 0.086
TG(O-54:2) [NL-18:1]		-0.0189988	-0.053 to 0.015	0.279395	0.660672	-0.0190012	-0.056 to 0.016	-0.0346584	-0.118 to 0.048	0.413117	0.519576	-0.0309629	-0.125 to 0.051
TG(O-54:3) [NL-17:1]		-0.0181305	-0.054 to 0.017	0.318561	0.689322	-0.0172022	-0.056 to 0.014	-0.00275074	-0.088 to 0.083	0.949788	0.964751	-0.00243124	-0.097 to 0.082
TG(O-54:3) [NL-18:1]		-0.0189168	-0.053 to 0.015	0.273854	0.657929	-0.0197926	-0.049 to 0.017	-0.0129546	-0.094 to 0.069	0.755491	0.824558	-0.013647	-0.1 to 0.073
TG(O-54:4) [NL-17:1]		0.0201283	-0.017 to 0.057	0.291627	0.663645	0.0200237	-0.018 to 0.059	0.106856	0.018 to 0.196	0.0191819	0.0387635	0.111016	0.013 to 0.187
TG(O-54:4) [NL-18:2]		-0.0129274	-0.045 to 0.019	0.43388	0.752532	-0.0117634	-0.047 to 0.014	-0.0183291	-0.096 to 0.059	0.642551	0.724194	-0.0203818	-0.094 to 0.054
Ubiquinone		-0.000125835	-0.037 to 0.037	0.994645	0.996478	0.000516601	-0.034 to 0.034	0.0107318	-0.077 to 0.099	0.811527	0.867418	0.010297	-0.083 to 0.094
CE(18:2) [+OH]		0.00709941	-0.028 to 0.043	0.695655	0.889339	0.00614222	-0.029 to 0.051	0.0214983	-0.064 to 0.107	0.623204	0.711185	0.0209374	-0.058 to 0.124
CE(20:4) [+OH]		0.0197213	-0.016 to 0.055	0.276334	0.65871	0.0185338	-0.017 to 0.06	0.0777454	-0.007 to 0.162	0.0720079	0.119653	0.0777249	-0.009 to 0.163
CE(22:6) [+OH]		-0.0222484	-0.055 to 0.011	0.189924	0.554064	-0.0233497	-0.052 to 0.01	-0.0137644	-0.094 to 0.066	0.736404	0.811718	-0.0177859	-0.085 to 0.076
LPC(18:2) [+OH]		0.00566306	-0.02 to 0.032	0.66797	0.880051	0.00823791	-0.043 to 0.035	0.0774717	0.016 to 0.139	0.0145206	0.0305366	0.0780619	0.021 to 0.135
LPC(20:4) [+OH]		-0.00224066	-0.024 to 0.02	0.840538	0.950519	-0.000463588	-0.047 to 0.024	0.0920896	0.04 to 0.144	0.000546478	0.00176038	0.09257	0.043 to 0.14
LPC(22:6) [+OH]		-0.0147555	-0.036 to 0.006	0.169143	0.540144	-0.0124111	-0.058 to 0.013	0.0396653	-0.011 to 0.09	0.12347	0.193562	0.040179	-0.004 to 0.087
PC(34:2) [+OH]		0.015626	-0.016 to 0.047	0.329246	0.698074	0.0147461	-0.016 to 0.047	0.00974352	-0.066 to 0.085	0.800671	0.859365	0.0073013	-0.058 to 0.086
PC(36:4) [+OH]		0.0414454	0.005 to 0.078	0.0255184	0.226357	0.0409189	0.007 to 0.079	0.150651	0.065 to 0.237	0.000661148	0.00203591	0.149366	0.057 to 0.24
PC(38:6) [+OH]		0.012791	-0.024 to 0.049	0.494715	0.78388	0.0121307	-0.023 to 0.048	-0.106637	-0.194 to -0.02	0.0166429	0.0343481	-0.104603	-0.205 to -0.025
Regression coefficients (β) are estimated difference in log lipidomic measure at 12 months of age (SD units) (adjusted for 6-month lipidomic measure) per 1 increase in total parent-reported infections from birth to 12 months of age (adjusted for number of infections from birth to 6 months), or per 1 SD increase in 12-month log GlycA (adjusted for 6-month GlycA).
Models are adjusted for infant sex, birth weight z-score, gestational age, exact age at 6-month and 12-month time point, maternal household income, exposure to any breastfeeding, exposure to any maternal smoking during pregnancy, and 6-month and 12-month blood sample processing time.
Adjusted p-values are based on the Benjamini-Hochberg method of adjustment for multiple comparisons.
Bootstrap estimates are calculated as the mean coefficent across 1000 iterations of bootstrap resampling.
Bootstrap 95% confidence intervals are bias-corrected accelerated percentile confidence intervals.
