# Supplementary material for: Early life infection and proinflammatory, atherogenic metabolomic and lipidomic profiles in infancy: a population-based cohort study
Source: eLife. 2022 May 10;11:e75170. doi: 10.7554/eLife.75170 (PMC9090335; doi:10.7554/eLife.75170)
Supplement: Figure 6—source data 1. [file elife-75170-fig6-data1.xlsx]

## Sheet: Figure 6 - Source Data 1
Figure 6 - Source Data 1. Summary of regression models for difference in 12-month LC/MS lipidomic measures per SD increase in 12-month log hsCRP.
		12-month hsCRP
Measure	Class Name	Estimate (β)	95% Confidence Interval	P-value	Adj. P-value	Bootstrap Estimate	Bootstrap 95% Confidence Interval
Total Sph	Sphingosines	0.00341074	-0.057 to 0.064	0.912576	0.928061	0.00357013	-0.059 to 0.064
Total S1P	Sphingosine phosphates	-0.02799	-0.088 to 0.032	0.360332	0.425847	-0.0272633	-0.092 to 0.031
Total dhCer	Dihydro-ceramides	-0.0684629	-0.156 to 0.019	0.123887	0.178947	-0.0714201	-0.149 to 0.02
Total Cer	Ceramides	-0.0326428	-0.12 to 0.054	0.462772	0.51566	-0.0326256	-0.112 to 0.05
Total C1P	Ceramide-1-phosphate	-0.181908	-0.266 to -0.097	2.86882e-05	0.000124315	-0.179186	-0.271 to -0.105
Total MHC	Hexosyl-ceramides	0.112065	0.026 to 0.198	0.011212	0.0246148	0.110071	0.032 to 0.204
Total DHC	Di-hexosyl-ceramides	0.17181	0.085 to 0.259	0.000120719	0.000362156	0.171799	0.077 to 0.259
Total THC	Tri-hexosyl-ceramides	-0.178502	-0.265 to -0.092	6.13077e-05	0.000217364	-0.178862	-0.254 to -0.094
Total GM3	GM3-gangliosides	0.0761444	-0.012 to 0.164	0.090563	0.135845	0.0753355	-0.014 to 0.162
Total GM1	GM1-gangliosides	0.00406799	-0.084 to 0.092	0.928061	0.928061	0.00437737	-0.088 to 0.097
Total Sulfatide	Sulfatides	-0.25824	-0.343 to -0.173	5.27776e-09	4.11665e-08	-0.259113	-0.333 to -0.17
Total SM	Sphingomyelins	-0.0348507	-0.123 to 0.053	0.436659	0.500873	-0.0350216	-0.126 to 0.062
Total PA	Phosphatidic acid	-0.0801066	-0.131 to -0.029	0.00207936	0.00540635	-0.0795978	-0.14 to -0.03
Total PC	Phosphatidylcholines	-0.179684	-0.265 to -0.095	4.14071e-05	0.000161488	-0.179471	-0.261 to -0.106
Total PC_O	Alkyl phosphatidylcholines	-0.111345	-0.198 to -0.025	0.0119918	0.0246148	-0.111125	-0.196 to -0.028
Total PC_P	Alkenyl phosphatidylcholines	-0.262561	-0.346 to -0.179	1.34673e-09	1.47314e-08	-0.264592	-0.338 to -0.174
Total LPC	Lysophosphatidylcholines	-0.195895	-0.258 to -0.134	1.51092e-09	1.47314e-08	-0.195862	-0.258 to -0.142
Total LPC_O	Lysoalkyl phosphatidylcholines	-0.0702872	-0.125 to -0.016	0.011604	0.0246148	-0.0698436	-0.125 to -0.024
Total LPC_P	Lysoalkenyl phosphatidylcholines	-0.191234	-0.247 to -0.135	6.6272e-11	1.2923e-09	-0.188696	-0.253 to -0.141
Total PE	Phosphatidylethanolamines	-0.0865044	-0.174 to 0.001	0.0524384	0.0852123	-0.0872623	-0.163 to 0.012
Total PE_O	Alkylphosphatidylethanolamines	-0.293603	-0.377 to -0.21	1.78201e-11	6.94983e-10	-0.293448	-0.373 to -0.204
Total PE_P	Alkenylphosphatidylethanolamines	-0.199883	-0.285 to -0.115	4.66681e-06	2.27507e-05	-0.19809	-0.283 to -0.126
Total LPE	Lysophosphatidylethanolamines	-0.231304	-0.313 to -0.15	4.00809e-08	2.60526e-07	-0.229742	-0.308 to -0.159
Total LPE_P	Lysoalkenylphosphatidylethanolamines	-0.0978891	-0.156 to -0.04	0.000985149	0.00274434	-0.0962784	-0.16 to -0.044
Total PI	Phosphatidylinositols	-0.223185	-0.309 to -0.138	4.30646e-07	2.39931e-06	-0.224152	-0.301 to -0.138
Total PIP1	Phosphatidylinositol phosphate	-0.0917914	-0.17 to -0.014	0.0213252	0.0396039	-0.0904922	-0.169 to -0.022
Total LPI	Lysophosphatidylinositols	-0.0231611	-0.107 to 0.061	0.589669	0.638809	-0.0224784	-0.108 to 0.052
Total PS	Phosphatidylserines	0.04217	-0.019 to 0.103	0.177719	0.239002	0.0439214	-0.028 to 0.1
Total PG	Phosphatidylglycerols	-0.109793	-0.196 to -0.023	0.013214	0.0257673	-0.111111	-0.193 to -0.022
Total CE	Cholesteryl esters	-0.16877	-0.254 to -0.084	0.000115516	0.000362156	-0.169122	-0.262 to -0.088
Total COH	Free cholesterol	-0.0665775	-0.154 to 0.021	0.137068	0.190917	-0.0664856	-0.159 to 0.021
Total DE	Dehydro-cholesteryl esters	-0.117225	-0.203 to -0.031	0.0079177	0.0192994	-0.116225	-0.211 to -0.035
Total FFA	Free fatty acids	-0.045225	-0.115 to 0.024	0.204008	0.265211	-0.0448835	-0.111 to 0.022
Total Acylcarnitine	Acylcarnitines	-0.027734	-0.086 to 0.031	0.352784	0.425847	-0.0271856	-0.088 to 0.025
Total DG	Diacylglycerols	-0.0201727	-0.106 to 0.066	0.644928	0.679789	-0.0205548	-0.101 to 0.064
Total TG	Triacylglycerols	-0.0892508	-0.176 to -0.002	0.044955	0.076228	-0.0876578	-0.173 to -0.006
Total TG_O	Alkyldiacylglycerols	-0.0761848	-0.163 to 0.011	0.0872948	0.135845	-0.0759095	-0.161 to 0.014
Total Ubiquinone	Ubiquinone	0.0509378	-0.036 to 0.138	0.25202	0.317058	0.0493882	-0.043 to 0.138
Total OxSpecies	Oxidised species	-0.0915848	-0.179 to -0.005	0.0396636	0.0703127	-0.0889266	-0.179 to -0.008
Sph(d16:1)		-0.0141795	-0.098 to 0.07	0.741718	0.803873	-0.0123668	-0.095 to 0.071
Sph(d18:1)		0.00879364	-0.051 to 0.068	0.772399	0.828769	0.0087915	-0.052 to 0.066
Sph(d18:2)		-0.00937444	-0.096 to 0.077	0.832397	0.876445	-0.00930265	-0.105 to 0.083
S1P(d16:1)		-0.0319201	-0.1 to 0.036	0.357515	0.451108	-0.0307148	-0.094 to 0.033
S1P(d18:0)		-0.0327058	-0.096 to 0.031	0.315126	0.404863	-0.0344092	-0.101 to 0.036
S1P(d18:1)		-0.0172465	-0.08 to 0.046	0.592392	0.671089	-0.0172788	-0.087 to 0.039
S1P(d18:2)		-0.0606622	-0.119 to -0.002	0.0421191	0.0769046	-0.0596803	-0.123 to -0.006
Cer(d18:0/16:0)		-0.11366	-0.199 to -0.028	0.00929737	0.0214725	-0.113917	-0.194 to -0.026
Cer(d18:0/18:0)		0.159639	0.076 to 0.243	0.000206954	0.000858805	0.161202	0.078 to 0.245
Cer(d18:0/20:0)		0.00640302	-0.08 to 0.093	0.884359	0.920263	0.00488235	-0.079 to 0.091
Cer(d18:0/22:0)		-0.0568028	-0.144 to 0.03	0.202066	0.280005	-0.0568198	-0.151 to 0.03
Cer(d18:0/24:0)		-0.1434	-0.23 to -0.056	0.00131015	0.00400507	-0.14124	-0.237 to -0.057
Cer(d18:0/24:1)		-0.010242	-0.097 to 0.077	0.817468	0.865423	-0.00938916	-0.108 to 0.076
Cer(d16:1/16:0)		0.0779165	-0.009 to 0.164	0.0779238	0.125977	0.0768834	0.002 to 0.166
Cer(d16:1/18:0)		0.118186	0.033 to 0.204	0.00706882	0.0169368	0.118099	0.035 to 0.196
Cer(d16:1/20:0)		0.0587613	-0.027 to 0.145	0.182259	0.257916	0.0581666	-0.028 to 0.138
Cer(d16:1/22:0)		-0.0309431	-0.117 to 0.055	0.48267	0.570947	-0.0315478	-0.116 to 0.049
Cer(d16:1/23:0)		-0.0573907	-0.144 to 0.029	0.192836	0.270597	-0.0553632	-0.143 to 0.022
Cer(d16:1/24:0)		-0.127803	-0.214 to -0.042	0.00385646	0.0102839	-0.128464	-0.208 to -0.043
Cer(d16:1/24:1)		0.00108995	-0.086 to 0.088	0.980344	0.984149	0.00321741	-0.089 to 0.088
Cer(d17:1/16:0)		0.0788113	-0.007 to 0.165	0.0735769	0.120914	0.0792509	-0.013 to 0.164
Cer(d17:1/18:0)		0.16649	0.082 to 0.251	0.000137075	0.000622046	0.168369	0.086 to 0.25
Cer(d17:1/20:0)		0.0597937	-0.027 to 0.146	0.175204	0.250845	0.0581338	-0.026 to 0.154
Cer(d17:1/22:0)		-0.00534831	-0.092 to 0.081	0.90356	0.932397	-0.00635079	-0.083 to 0.085
Cer(d17:1/23:0)		-0.0540481	-0.141 to 0.033	0.222476	0.303946	-0.0562011	-0.134 to 0.029
Cer(d17:1/24:0)		-0.11372	-0.201 to -0.027	0.010523	0.0237378	-0.11373	-0.203 to -0.027
Cer(d17:1/24:1)		0.0260376	-0.061 to 0.113	0.555943	0.640076	0.024895	-0.058 to 0.116
Cer(d18:1/14:0)		0.0636988	-0.017 to 0.144	0.121246	0.181751	0.0669107	-0.015 to 0.14
Cer(d18:1/16:0)		0.0939631	0.009 to 0.179	0.0299643	0.0572717	0.0954158	0.016 to 0.187
Cer(d18:1/17:0)		-0.0310328	-0.118 to 0.056	0.483392	0.570947	-0.0299792	-0.117 to 0.05
Cer(d18:1/18:0)		0.262071	0.179 to 0.345	1.42806e-09	3.46304e-08	0.260577	0.168 to 0.357
Cer(d18:1/19:0)		0.107681	0.022 to 0.194	0.0144641	0.031265	0.107979	0.022 to 0.192
Cer(d18:1/20:0)		0.154097	0.069 to 0.239	0.000441585	0.00163957	0.15347	0.071 to 0.239
Cer(d18:1/21:0)		0.104682	0.018 to 0.191	0.0179312	0.037607	0.103796	0.012 to 0.197
Cer(d18:1/22:0)		0.0690336	-0.018 to 0.156	0.118571	0.178663	0.0694361	-0.013 to 0.157
Cer(d18:1/23:0)		-0.0187931	-0.105 to 0.068	0.671003	0.747057	-0.0212979	-0.096 to 0.078
Cer(d18:1/24:0)		-0.0824599	-0.17 to 0.005	0.0666388	0.11193	-0.0820275	-0.159 to 0.001
Cer(d18:1/24:1)		0.0804641	-0.006 to 0.167	0.0701955	0.116642	0.0799795	-0.001 to 0.168
Cer(d18:1/26:0)		-0.0480911	-0.135 to 0.039	0.279224	0.365843	-0.0519327	-0.128 to 0.05
Cer(d18:2/14:0)		-0.0986982	-0.185 to -0.012	0.0256946	0.0500979	-0.0974803	-0.186 to -0.02
Cer(d18:2/16:0)		-0.0422113	-0.128 to 0.043	0.332701	0.425331	-0.0416327	-0.129 to 0.04
Cer(d18:2/17:0)		-0.0205566	-0.107 to 0.066	0.642871	0.719928	-0.0205677	-0.105 to 0.066
Cer(d18:2/18:0)		0.0811437	-0.005 to 0.167	0.0642531	0.108866	0.0801095	0.002 to 0.173
Cer(d18:2/20:0)		-0.0138309	-0.1 to 0.072	0.753354	0.813077	-0.0112537	-0.096 to 0.072
Cer(d18:2/21:0)		-0.0178623	-0.105 to 0.069	0.686734	0.757368	-0.0192473	-0.107 to 0.062
Cer(d18:2/22:0)		-0.056653	-0.143 to 0.029	0.197538	0.274712	-0.0577514	-0.138 to 0.032
Cer(d18:2/23:0)		-0.0931177	-0.179 to -0.008	0.0332912	0.0630098	-0.0917399	-0.181 to -0.001
Cer(d18:2/24:0)		-0.144698	-0.231 to -0.059	0.00106799	0.00345315	-0.143391	-0.22 to -0.057
Cer(d18:2/24:1)		-0.0475404	-0.133 to 0.038	0.277227	0.364623	-0.0472353	-0.128 to 0.035
Cer(d18:2/26:0)		-0.090713	-0.177 to -0.004	0.0400047	0.0737379	-0.0873317	-0.176 to -0.011
Cer(d19:1/16:0)		-0.00369922	-0.089 to 0.082	0.93223	0.95311	-0.00598845	-0.084 to 0.084
Cer(d19:1/18:0)		0.140717	0.055 to 0.226	0.00129793	0.00399679	0.140788	0.059 to 0.228
Cer(d19:1/20:0)		0.0835824	-0.002 to 0.169	0.0570043	0.0987395	0.0826035	0.001 to 0.166
Cer(d19:1/22:0)		0.0253056	-0.061 to 0.112	0.566537	0.650344	0.0237129	-0.057 to 0.11
Cer(d19:1/23:0)		-0.038761	-0.125 to 0.048	0.379625	0.471342	-0.0401084	-0.124 to 0.041
Cer(d19:1/24:0)		-0.081021	-0.168 to 0.006	0.0673921	0.112708	-0.0814626	-0.159 to 0.009
Cer(d19:1/24:1)		0.00074083	-0.086 to 0.088	0.986654	0.989168	-0.000856058	-0.076 to 0.091
Cer(d19:1/26:0)		-0.055965	-0.142 to 0.03	0.204272	0.282558	-0.0575464	-0.135 to 0.048
Cer(d20:1/22:0)		-0.0205312	-0.107 to 0.066	0.642926	0.719928	-0.0219268	-0.104 to 0.06
Cer(d20:1/23:0)		-0.0762904	-0.163 to 0.01	0.0841609	0.133556	-0.0787859	-0.165 to 0.014
Cer(d20:1/24:0)		-0.161369	-0.248 to -0.075	0.000267476	0.00108671	-0.160494	-0.246 to -0.067
Cer(d20:1/24:1)		0.0385795	-0.048 to 0.125	0.384217	0.475239	0.0368951	-0.046 to 0.12
Cer(d20:1/26:0)		-0.161408	-0.248 to -0.075	0.000271203	0.00108967	-0.164038	-0.243 to -0.079
Cer(m18:0/20:0)		-0.148142	-0.233 to -0.063	0.000678025	0.00237003	-0.149319	-0.234 to -0.064
Cer(m18:0/22:0)		-0.153402	-0.239 to -0.068	0.000455619	0.00168362	-0.152723	-0.229 to -0.078
Cer(m18:0/23:0)		-0.17838	-0.264 to -0.093	4.99043e-05	0.000272717	-0.178883	-0.263 to -0.091
Cer(m18:0/24:0)		-0.19466	-0.28 to -0.11	9.01569e-06	6.47794e-05	-0.194698	-0.277 to -0.118
Cer(m18:0/24:1)		-0.0857574	-0.172 to 0	0.0517208	0.0908039	-0.0852737	-0.173 to 0.004
Cer(m18:1/18:0)		-0.100756	-0.187 to -0.015	0.0218784	0.044678	-0.100178	-0.184 to -0.022
Cer(m18:1/20:0)		-0.190639	-0.275 to -0.106	1.13306e-05	7.78102e-05	-0.189842	-0.275 to -0.112
Cer(m18:1/22:0)		-0.240447	-0.325 to -0.156	4.35295e-08	5.72523e-07	-0.239878	-0.316 to -0.167
Cer(m18:1/23:0)		-0.239651	-0.324 to -0.155	4.78213e-08	6.18489e-07	-0.239038	-0.317 to -0.158
Cer(m18:1/24:0)		-0.240798	-0.326 to -0.156	4.135e-08	5.62941e-07	-0.24088	-0.318 to -0.165
Cer(m18:1/24:1)		-0.163566	-0.249 to -0.078	0.000210928	0.000870638	-0.162276	-0.239 to -0.079
Cer1P(d18:1/16:0)		-0.181908	-0.266 to -0.097	2.86882e-05	0.000171246	-0.179245	-0.27 to -0.103
HexCer(d16:1/18:0)		0.0176855	-0.07 to 0.105	0.691468	0.760027	0.0191863	-0.073 to 0.108
HexCer(d16:1/20:0)		-0.0979169	-0.185 to -0.011	0.0284125	0.0546427	-0.101198	-0.189 to -0.004
HexCer(d16:1/22:0)		-0.0686784	-0.156 to 0.019	0.124599	0.18594	-0.0702939	-0.158 to 0.024
HexCer(d16:1/24:0)		-0.0797998	-0.167 to 0.007	0.0734397	0.120914	-0.0786638	-0.173 to 0.004
HexCer(d18:1/16:0)		0.284128	0.201 to 0.368	6.85874e-11	3.54826e-09	0.285823	0.204 to 0.366
HexCer(d18:1/18:0)		0.0327958	-0.055 to 0.12	0.461968	0.550671	0.0327358	-0.062 to 0.117
HexCer(d18:1/20:0)		-0.0488572	-0.136 to 0.038	0.273349	0.360747	-0.0500445	-0.133 to 0.04
HexCer(d18:1/22:0)		-0.0170506	-0.105 to 0.071	0.703351	0.767652	-0.0155448	-0.111 to 0.072
HexCer(d18:1/24:0)		-0.00802546	-0.095 to 0.079	0.856362	0.896811	-0.00730154	-0.097 to 0.08
HexCer(d18:1/24:1)		0.125169	0.04 to 0.211	0.00430229	0.011241	0.125563	0.046 to 0.204
HexCer(d18:2/18:0)		-0.0989886	-0.185 to -0.013	0.0251457	0.0495255	-0.0990602	-0.186 to -0.014
HexCer(d18:2/20:0)		-0.0457111	-0.133 to 0.041	0.302457	0.390527	-0.0458221	-0.14 to 0.047
HexCer(d18:2/22:0)		-0.0690405	-0.156 to 0.018	0.121324	0.181751	-0.0709915	-0.147 to 0.028
HexCer(d18:2/24:0)		-0.0859426	-0.173 to 0.001	0.0522167	0.0914302	-0.0881725	-0.166 to 0.008
Hex2Cer(d16:1/16:0)		0.217865	0.132 to 0.303	8.22788e-07	7.66363e-06	0.218224	0.133 to 0.301
Hex2Cer(d16:1/24:1)		0.0727886	-0.014 to 0.159	0.100435	0.154946	0.0733374	-0.022 to 0.152
Hex2Cer(d18:1/16:0)		0.189241	0.102 to 0.276	2.33593e-05	0.000145015	0.189719	0.1 to 0.278
Hex2Cer(d18:1/18:0)		-0.125946	-0.213 to -0.039	0.00478633	0.0123627	-0.125809	-0.215 to -0.042
Hex2Cer(d18:1/20:0)		0.0765355	-0.008 to 0.161	0.0766476	0.124432	0.0772921	-0.012 to 0.168
Hex2Cer(d18:1/22:0)		0.0927408	0.011 to 0.175	0.0269278	0.05198	0.0923034	0.015 to 0.174
Hex2Cer(d18:1/24:0)		0.0248609	-0.059 to 0.109	0.563421	0.647726	0.0256155	-0.054 to 0.104
Hex2Cer(d18:1/24:1)		0.155715	0.069 to 0.243	0.000482	0.00173968	0.15594	0.066 to 0.241
Hex2Cer(d18:2/16:0)		0.24739	0.163 to 0.332	1.87706e-08	2.73493e-07	0.246651	0.171 to 0.344
Hex2Cer(d18:2/24:1)		0.058977	-0.029 to 0.146	0.187096	0.263496	0.05972	-0.024 to 0.149
Hex3Cer(d18:1/16:0)		-0.173614	-0.26 to -0.087	9.89683e-05	0.000471162	-0.17273	-0.257 to -0.089
Hex3Cer(d18:1/18:0)		-0.17948	-0.266 to -0.093	5.07975e-05	0.000275656	-0.180023	-0.271 to -0.084
Hex3Cer(d18:1/20:0)		-0.138618	-0.225 to -0.052	0.00183216	0.00536512	-0.138851	-0.227 to -0.049
Hex3Cer(d18:1/22:0)		-0.169043	-0.254 to -0.084	0.000116961	0.000543482	-0.166793	-0.256 to -0.09
Hex3Cer(d18:1/24:0)		-0.144761	-0.231 to -0.058	0.00112586	0.00359997	-0.14558	-0.237 to -0.061
Hex3Cer(d18:1/24:1)		-0.108941	-0.196 to -0.022	0.0147409	0.0317748	-0.112696	-0.187 to -0.022
GM3(d18:1/16:0)		0.171251	0.084 to 0.259	0.000143083	0.000636672	0.170274	0.075 to 0.266
GM3(d18:1/18:0)		-0.16002	-0.246 to -0.074	0.000307434	0.00119284	-0.15826	-0.255 to -0.074
GM3(d18:1/20:0)		0.169752	0.083 to 0.257	0.000143029	0.000636672	0.169804	0.078 to 0.267
GM3(d18:1/22:0)		-0.00291686	-0.09 to 0.084	0.947852	0.967807	-0.00725796	-0.086 to 0.087
GM3(d18:1/24:0)		-0.042678	-0.131 to 0.045	0.341785	0.435509	-0.0425364	-0.133 to 0.039
GM3(d18:1/24:1)		-0.0247544	-0.112 to 0.063	0.579459	0.660122	-0.0248277	-0.117 to 0.061
GM1(d18:1/16:0)		0.00406799	-0.084 to 0.092	0.928061	0.95045	0.00295674	-0.084 to 0.097
Sulfatide (d18:1:/16:0(OH))		-0.179778	-0.266 to -0.094	4.72855e-05	0.000260957	-0.178841	-0.264 to -0.095
Sulfatide (d18:1:/16:0)		-0.20943	-0.295 to -0.124	2.00275e-06	1.68928e-05	-0.209764	-0.296 to -0.118
Sulfatide (d18:1:/24:0(OH))		-0.174914	-0.26 to -0.089	7.02147e-05	0.000363244	-0.176145	-0.268 to -0.09
Sulfatide (d18:1:/24:0)		-0.264333	-0.349 to -0.18	1.7678e-09	3.7076e-08	-0.263026	-0.359 to -0.183
Sulfatide (d18:1:/24:1(OH))		-0.200959	-0.285 to -0.116	4.01068e-06	3.02164e-05	-0.202642	-0.287 to -0.118
Sulfatide (d18:1:/24:1)		-0.264598	-0.349 to -0.18	1.68469e-09	3.66597e-08	-0.263978	-0.342 to -0.189
SM(34:3)		-0.115512	-0.202 to -0.029	0.00943434	0.0216599	-0.114392	-0.2 to -0.033
SM(35:2) (b)		-0.0752863	-0.163 to 0.012	0.0919367	0.143836	-0.0731717	-0.161 to 0.015
SM(37:1)		-0.019373	-0.106 to 0.068	0.662994	0.7392	-0.0206749	-0.108 to 0.072
SM(37:2)		-0.0763992	-0.163 to 0.01	0.084108	0.133556	-0.0763338	-0.171 to 0.004
SM(38:3) (a)		0.0940805	0.007 to 0.182	0.0354536	0.066615	0.0953262	0.002 to 0.184
SM(38:3) (b)		-0.0233586	-0.11 to 0.063	0.596406	0.67367	-0.0234553	-0.119 to 0.06
SM(40:3) (a)		0.00170254	-0.086 to 0.089	0.969611	0.978437	0.000223023	-0.082 to 0.083
SM(40:3) (b)		0.0127067	-0.074 to 0.1	0.774301	0.828769	0.0131275	-0.074 to 0.104
SM(41:0)		0.00023342	-0.087 to 0.088	0.995829	0.995829	-0.00209246	-0.1 to 0.1
SM(41:1) (a)		0.0171083	-0.07 to 0.104	0.701033	0.76728	0.0175508	-0.077 to 0.097
SM(43:1)		-0.00588345	-0.093 to 0.081	0.895031	0.927295	-0.00773235	-0.092 to 0.091
SM(43:2) (b)		0.094354	0.008 to 0.181	0.0326772	0.0619989	0.0930586	0.005 to 0.186
SM(43:2) (c)		0.00772083	-0.08 to 0.095	0.862763	0.902296	0.00784772	-0.092 to 0.094
SM(44:1)		-0.00401098	-0.091 to 0.083	0.928404	0.95045	-0.00636883	-0.099 to 0.092
SM(44:2)		0.0121768	-0.075 to 0.1	0.785322	0.838253	0.0117523	-0.079 to 0.108
SM(44:3)		-0.014782	-0.103 to 0.073	0.74143	0.803873	-0.0149618	-0.111 to 0.073
SM(d16:1/19:0)		-0.0302738	-0.116 to 0.056	0.491423	0.577795	-0.0303324	-0.112 to 0.052
SM(d16:1/23:0)/SM(d17:1/22:0)		-0.0569692	-0.144 to 0.03	0.200331	0.278099	-0.054452	-0.154 to 0.025
SM(d16:1/24:1)		-0.00840474	-0.096 to 0.079	0.850658	0.892042	-0.00942215	-0.097 to 0.07
SM(d17:1/14:0)		-0.116219	-0.202 to -0.03	0.0083506	0.0194597	-0.115174	-0.201 to -0.031
SM(d17:1/16:0)		-0.074552	-0.161 to 0.012	0.090876	0.142753	-0.0774968	-0.158 to 0.014
SM(d17:1/24:1)		0.0301206	-0.057 to 0.117	0.496449	0.58282	0.0304405	-0.051 to 0.122
SM(d18:0/14:0)		-0.109748	-0.197 to -0.023	0.0136748	0.0298081	-0.110049	-0.194 to -0.008
SM(d18:0/16:0)		-0.0383927	-0.126 to 0.049	0.391688	0.483227	-0.0380597	-0.134 to 0.06
SM(d18:0/22:0)		0.00267724	-0.085 to 0.09	0.952228	0.970998	0.00258782	-0.088 to 0.089
SM(d18:1/14:0/SM(d16:1/16:0)		-0.064982	-0.152 to 0.022	0.143475	0.209674	-0.0617521	-0.159 to 0.014
SM(d18:1/16:0)		-0.0671583	-0.155 to 0.02	0.133775	0.196982	-0.0668153	-0.153 to 0.022
SM(d18:1/17:0)/SM(d17:1/18:0)		0.0741662	-0.013 to 0.161	0.0953094	0.14792	0.0732186	-0.024 to 0.158
SM(d18:1/18:0/SM(d16:1/20:0)		-0.024142	-0.111 to 0.063	0.586701	0.666589	-0.0220149	-0.112 to 0.063
SM(d18:1/20:0)/SM(d16:1/22:0)		-0.0655049	-0.153 to 0.022	0.141695	0.207463	-0.0686675	-0.157 to 0.025
SM(d18:1/22:0)/SM(d16:1/24:0)		0.0136549	-0.074 to 0.102	0.76142	0.818368	0.0145449	-0.083 to 0.109
SM(d18:1/23:0)/SM(d17:1/24:0)		0.00849602	-0.079 to 0.096	0.849422	0.89195	0.00886897	-0.099 to 0.094
SM(d18:1/24:0)		-0.0185618	-0.107 to 0.069	0.679621	0.754486	-0.0167415	-0.114 to 0.073
SM(d18:1/24:1)		0.0626747	-0.024 to 0.15	0.158969	0.230149	0.0637515	-0.026 to 0.145
SM(d18:2/14:0)		-0.206055	-0.291 to -0.121	2.46433e-06	2.01297e-05	-0.208328	-0.284 to -0.127
SM(d18:2/16:0)		-0.146952	-0.232 to -0.062	0.00075753	0.00261264	-0.14808	-0.227 to -0.069
SM(d18:2/17:0)		-0.0827798	-0.169 to 0.003	0.0592018	0.102318	-0.0858607	-0.16 to 0.011
SM(d18:2/18:0)		-0.0810047	-0.168 to 0.006	0.0673188	0.112708	-0.0817436	-0.161 to 0.018
SM(d18:2/18:1)		-0.0477745	-0.134 to 0.039	0.280039	0.365843	-0.0448984	-0.145 to 0.033
SM(d18:2/20:0)		-0.0937074	-0.181 to -0.006	0.0358235	0.0671473	-0.0929753	-0.182 to -0.001
SM(d18:2/22:0)		-0.082952	-0.17 to 0.004	0.0619791	0.105938	-0.0840187	-0.172 to 0.01
SM(d18:2/23:0)		-0.0553215	-0.142 to 0.031	0.210785	0.291048	-0.0540918	-0.141 to 0.035
SM(d18:2/24:0)		-0.0805727	-0.168 to 0.007	0.0719526	0.119306	-0.0818553	-0.164 to 0.025
SM(d19:1/24:1)		0.0266797	-0.06 to 0.113	0.546151	0.632557	0.0255959	-0.045 to 0.114
PA(34:1)		-0.0860327	-0.142 to -0.03	0.00262836	0.00733671	-0.0861007	-0.162 to -0.032
PA(36:1)		-0.0606697	-0.129 to 0.008	0.0831146	0.132983	-0.0610885	-0.147 to 0.01
PA(36:2)		-0.0940889	-0.148 to -0.04	0.000739878	0.00256315	-0.0940235	-0.156 to -0.043
PA(36:3)		-0.0548819	-0.106 to -0.004	0.0340764	0.0641828	-0.054588	-0.112 to -0.007
PA(36:4)		-0.0992821	-0.159 to -0.039	0.00124676	0.00389739	-0.0968611	-0.173 to -0.035
PA(40:6)		-0.0431554	-0.12 to 0.034	0.273975	0.360959	-0.0421296	-0.127 to 0.032
PC(14:0_16:0)		-0.145068	-0.231 to -0.059	0.00105763	0.00343397	-0.14353	-0.231 to -0.065
PC(14:0_20:4)		-0.204186	-0.289 to -0.119	3.31287e-06	2.55419e-05	-0.205826	-0.283 to -0.127
PC(14:0_22:6)		-0.225881	-0.31 to -0.141	2.38005e-07	2.56516e-06	-0.225538	-0.305 to -0.152
PC(15-MHDA_18:1)		-0.104684	-0.191 to -0.019	0.0174838	0.0367681	-0.104599	-0.183 to -0.024
PC(15-MHDA_18:2)		-0.172437	-0.258 to -0.087	8.47041e-05	0.000413399	-0.173693	-0.254 to -0.102
PC(15-MHDA_20:4)		-0.12809	-0.213 to -0.043	0.0033425	0.00906917	-0.12936	-0.203 to -0.06
PC(15-MHDA_22:6)		-0.170531	-0.255 to -0.086	9.14681e-05	0.00044362	-0.170424	-0.242 to -0.094
PC(15:0_20:3)		-0.0915555	-0.178 to -0.006	0.0374507	0.06986	-0.0945857	-0.168 to -0.01
PC(15:0_20:4)		-0.152145	-0.237 to -0.067	0.000472841	0.0017146	-0.151805	-0.233 to -0.081
PC(15:0_22:6)		-0.203165	-0.287 to -0.119	2.75884e-06	2.20707e-05	-0.204138	-0.282 to -0.131
PC(16:0_16:0)		-0.0915065	-0.178 to -0.005	0.0387462	0.0719308	-0.0940975	-0.177 to 0.004
PC(16:0_18:0)		-0.0818735	-0.167 to 0.003	0.059774	0.102848	-0.0831898	-0.163 to 0.01
PC(16:0_18:1)		-0.139447	-0.224 to -0.055	0.00128046	0.00395871	-0.140826	-0.23 to -0.052
PC(16:0_18:2)		-0.128682	-0.215 to -0.042	0.00377866	0.0101112	-0.126305	-0.21 to -0.049
PC(16:0_18:3) (a)		-0.147115	-0.232 to -0.062	0.000771583	0.00263688	-0.146934	-0.229 to -0.071
PC(16:0_18:3) (b)		-0.0719858	-0.154 to 0.01	0.0875465	0.138081	-0.0744153	-0.145 to 0.009
PC(16:0_20:3) (a)		-0.117623	-0.204 to -0.031	0.00773699	0.018249	-0.116989	-0.196 to -0.034
PC(16:0_20:3) (b)		-0.0278267	-0.114 to 0.059	0.528837	0.61441	-0.0285884	-0.115 to 0.049
PC(16:0_20:4)		-0.0771921	-0.165 to 0.01	0.0840588	0.133556	-0.0784876	-0.164 to -0.002
PC(16:0_20:5)		-0.106339	-0.192 to -0.021	0.0154673	0.0329742	-0.108068	-0.183 to -0.03
PC(16:0_22:6)		-0.168748	-0.253 to -0.084	0.000103388	0.000489204	-0.16851	-0.258 to -0.095
PC(16:1_18:2)		-0.293619	-0.377 to -0.21	1.46843e-11	1.44192e-09	-0.294378	-0.365 to -0.212
PC(16:1_20:4)		-0.245846	-0.33 to -0.161	1.90317e-08	2.73493e-07	-0.248548	-0.322 to -0.162
PC(16:1_22:6)		-0.283436	-0.366 to -0.201	4.85036e-11	2.68848e-09	-0.282819	-0.361 to -0.211
PC(17:0_18:1)		-0.134389	-0.22 to -0.049	0.00221214	0.00635786	-0.134693	-0.214 to -0.06
PC(17:0_18:2)		-0.221704	-0.306 to -0.137	3.74504e-07	3.92723e-06	-0.220808	-0.311 to -0.146
PC(17:0_20:4)		-0.137869	-0.223 to -0.053	0.0015065	0.00451368	-0.139922	-0.211 to -0.056
PC(17:0_22:6)		-0.156436	-0.241 to -0.072	0.000295267	0.00115721	-0.156086	-0.231 to -0.066
PC(17:1_18:2)		-0.258079	-0.342 to -0.174	3.81105e-09	7.04137e-08	-0.257448	-0.323 to -0.185
PC(18:0_18:1)		-0.100507	-0.187 to -0.014	0.0224973	0.0458212	-0.101999	-0.186 to -0.02
PC(18:0_18:2)		-0.127184	-0.213 to -0.042	0.0036584	0.00982324	-0.125588	-0.21 to -0.052
PC(18:0_20:3)		-0.0711544	-0.157 to 0.015	0.106369	0.163774	-0.0714887	-0.154 to 0.018
PC(18:0_20:4)		-0.0696809	-0.155 to 0.016	0.111757	0.170193	-0.0707204	-0.15 to 0.01
PC(18:0_22:4)		-0.0266836	-0.114 to 0.061	0.549119	0.634102	-0.0251066	-0.118 to 0.058
PC(18:0_22:5) (n3)		-0.0583964	-0.144 to 0.027	0.181398	0.25734	-0.0594138	-0.137 to 0.026
PC(18:0_22:5) (n6)		-0.0281365	-0.115 to 0.059	0.525676	0.61342	-0.0263874	-0.109 to 0.056
PC(18:0_22:6)		-0.0731298	-0.158 to 0.012	0.0931283	0.145116	-0.0742793	-0.165 to 0.012
PC(18:1_18:1)		-0.142852	-0.229 to -0.057	0.00125058	0.00389739	-0.142473	-0.224 to -0.061
PC(18:1_18:2)		-0.249851	-0.335 to -0.165	1.54655e-08	2.39301e-07	-0.248221	-0.336 to -0.174
PC(18:1_20:3)		-0.182395	-0.267 to -0.097	3.11611e-05	0.000183189	-0.183111	-0.263 to -0.102
PC(18:1_22:6) (a)		-0.176709	-0.262 to -0.091	5.69829e-05	0.000302868	-0.17697	-0.282 to -0.091
PC(18:1_22:6) (b)		-0.0620187	-0.148 to 0.024	0.158288	0.229591	-0.0600451	-0.147 to 0.012
PC(18:2_18:2)		-0.250588	-0.336 to -0.165	1.4412e-08	2.30279e-07	-0.250658	-0.33 to -0.168
PC(18:2_20:5)		-0.23611	-0.32 to -0.152	6.19217e-08	7.3925e-07	-0.236416	-0.306 to -0.159
PC(20:0_20:4)		-0.131844	-0.219 to -0.045	0.00309275	0.00851054	-0.133912	-0.228 to -0.042
PC(28:0)		-0.139226	-0.225 to -0.053	0.00162038	0.00481769	-0.138373	-0.224 to -0.053
PC(31:0) (a)		-0.0627105	-0.149 to 0.024	0.155532	0.226016	-0.0639697	-0.146 to 0.021
PC(31:0) (b)		-0.0423518	-0.129 to 0.044	0.337309	0.430513	-0.0447238	-0.119 to 0.044
PC(32:1)		-0.112799	-0.195 to -0.031	0.00739273	0.0175436	-0.114425	-0.186 to -0.022
PC(32:2)		-0.214485	-0.298 to -0.13	7.73675e-07	7.412e-06	-0.215528	-0.294 to -0.14
PC(33:0) (a)		-0.100085	-0.186 to -0.014	0.0233198	0.0470029	-0.10112	-0.187 to -0.015
PC(33:0) (b)		-0.0547869	-0.141 to 0.032	0.214836	0.29559	-0.0562037	-0.136 to 0.032
PC(33:1)		-0.120119	-0.205 to -0.035	0.00569404	0.0142996	-0.122008	-0.193 to -0.041
PC(33:2)		-0.16823	-0.253 to -0.084	0.00011036	0.000519028	-0.167221	-0.25 to -0.093
PC(34:5)		-0.145786	-0.232 to -0.059	0.00103545	0.00337609	-0.143546	-0.231 to -0.073
PC(35:5)		-0.106862	-0.193 to -0.021	0.01539	0.0328999	-0.109046	-0.187 to -0.03
PC(36:6) (a)		-0.17519	-0.261 to -0.09	6.97474e-05	0.000363244	-0.174751	-0.25 to -0.091
PC(38:2)		-0.117162	-0.204 to -0.031	0.00818568	0.0191328	-0.118334	-0.197 to -0.037
PC(38:4) (b)		-0.0899466	-0.176 to -0.004	0.0408836	0.0750016	-0.0913737	-0.165 to -0.005
PC(38:5) (a)		-0.162288	-0.247 to -0.078	0.000187477	0.000791606	-0.16253	-0.248 to -0.081
PC(38:5) (b)		-0.109842	-0.196 to -0.024	0.0123872	0.0273835	-0.109886	-0.192 to -0.027
PC(38:6) (a)		-0.26717	-0.351 to -0.183	8.98422e-10	2.24895e-08	-0.266677	-0.344 to -0.192
PC(38:7)(c)		-0.267706	-0.351 to -0.185	5.50793e-10	1.47385e-08	-0.267357	-0.346 to -0.186
PC(39:5)(a)		-0.196428	-0.281 to -0.112	6.50846e-06	4.76469e-05	-0.195231	-0.278 to -0.126
PC(39:5)(b)		-0.16222	-0.247 to -0.077	0.000196205	0.000818577	-0.161537	-0.247 to -0.087
PC(40:10)		-0.058342	-0.132 to 0.016	0.122199	0.182709	-0.0579352	-0.129 to 0.018
PC(40:7) (a)		-0.286523	-0.369 to -0.204	3.36526e-11	2.1762e-09	-0.285978	-0.363 to -0.211
PC(40:8)		-0.320314	-0.401 to -0.24	3.29159e-14	2.55427e-11	-0.321465	-0.386 to -0.246
PC(44:12)		-0.25502	-0.336 to -0.174	1.50771e-09	3.51321e-08	-0.252806	-0.34 to -0.175
PC(O-16:0/16:0)		-0.0602862	-0.147 to 0.027	0.17579	0.251221	-0.059517	-0.152 to 0.031
PC(O-16:0/20:3)		-0.0181188	-0.105 to 0.069	0.683571	0.755629	-0.0180248	-0.114 to 0.072
PC(O-16:0/20:4)		-0.120102	-0.207 to -0.033	0.00717232	0.0171253	-0.11842	-0.209 to -0.033
PC(O-16:0/22:6)		-0.0587594	-0.144 to 0.026	0.175189	0.250845	-0.0556085	-0.149 to 0.024
PC(O-18:0/18:1)		-0.0536505	-0.139 to 0.032	0.217959	0.298827	-0.0527896	-0.145 to 0.032
PC(O-18:0/18:2)		-0.141967	-0.228 to -0.056	0.00131094	0.00400507	-0.141189	-0.227 to -0.059
PC(O-18:0/20:4)		-0.0704897	-0.157 to 0.016	0.109116	0.16701	-0.0692964	-0.152 to 0.013
PC(O-18:0/22:6)		-0.040994	-0.126 to 0.044	0.346429	0.439981	-0.0392218	-0.125 to 0.036
PC(O-18:1/18:1)		-0.15776	-0.244 to -0.072	0.000356455	0.00135593	-0.159128	-0.246 to -0.072
PC(O-18:1/18:2)		-0.155609	-0.243 to -0.069	0.000497913	0.0017888	-0.151993	-0.243 to -0.079
PC(O-32:1)		-0.140584	-0.226 to -0.055	0.00133485	0.00403051	-0.138227	-0.23 to -0.065
PC(O-32:2)		-0.182495	-0.268 to -0.097	3.45225e-05	0.000198441	-0.182673	-0.266 to -0.096
PC(O-34:1)		-0.0773187	-0.163 to 0.009	0.0783106	0.126339	-0.0767543	-0.164 to 0.011
PC(O-34:2)		-0.164677	-0.252 to -0.078	0.000233143	0.000957243	-0.162497	-0.239 to -0.072
PC(O-34:4)		-0.192898	-0.279 to -0.107	1.30079e-05	8.49689e-05	-0.191096	-0.281 to -0.114
PC(O-35:4)		-0.122482	-0.207 to -0.038	0.00479533	0.0123627	-0.120224	-0.205 to -0.047
PC(O-36:0)		-0.00965107	-0.093 to 0.073	0.819996	0.865651	-0.0096638	-0.091 to 0.071
PC(O-36:5)		-0.0465702	-0.133 to 0.04	0.28987	0.377409	-0.04563	-0.132 to 0.04
PC(O-38:5)		-0.075111	-0.161 to 0.011	0.0885113	0.13932	-0.0728137	-0.167 to 0.003
PC(O-40:5)		0.00580624	-0.08 to 0.092	0.89451	0.927295	0.00599334	-0.075 to 0.092
PC(O-40:7) (a)		-0.0358573	-0.121 to 0.049	0.407183	0.496035	-0.0333913	-0.119 to 0.049
PC(O-40:7) (b)		0.0178241	-0.069 to 0.105	0.688073	0.757368	0.0187888	-0.071 to 0.105
PC(P-15:0/20:4) (a)		-0.0851869	-0.17 to 0	0.050155	0.0888591	-0.0850215	-0.164 to -0.001
PC(P-15:0/20:4) (b)		-0.121261	-0.206 to -0.037	0.00503645	0.0127722	-0.120327	-0.197 to -0.04
PC(P-16:0/14:0)		-0.210721	-0.296 to -0.126	1.61872e-06	1.3957e-05	-0.211398	-0.288 to -0.121
PC(P-16:0/16:0)		-0.216893	-0.302 to -0.132	7.98143e-07	7.55316e-06	-0.216676	-0.297 to -0.135
PC(P-16:0/16:1)		-0.283274	-0.365 to -0.201	3.66318e-11	2.18663e-09	-0.285047	-0.364 to -0.203
PC(P-16:0/18:0)		-0.118669	-0.205 to -0.032	0.0072214	0.0171896	-0.116304	-0.205 to -0.034
PC(P-16:0/18:1)		-0.268288	-0.352 to -0.184	7.53307e-10	1.94855e-08	-0.269111	-0.353 to -0.176
PC(P-16:0/18:2)		-0.300234	-0.384 to -0.217	6.21359e-12	1.20544e-09	-0.298453	-0.393 to -0.219
PC(P-16:0/18:3)		-0.179222	-0.265 to -0.094	4.45688e-05	0.00025041	-0.176464	-0.266 to -0.101
PC(P-16:0/20:4)		-0.243696	-0.328 to -0.16	2.2026e-08	3.10767e-07	-0.24113	-0.317 to -0.162
PC(P-16:0/20:5)		-0.157641	-0.242 to -0.073	0.000283394	0.00112201	-0.157003	-0.246 to -0.076
PC(P-16:0/22:6)		-0.208319	-0.292 to -0.125	1.29215e-06	1.12664e-05	-0.207832	-0.284 to -0.127
PC(P-17:0/20:4) (a)		-0.160984	-0.244 to -0.078	0.000148671	0.000651802	-0.160222	-0.241 to -0.088
PC(P-17:0/20:4) (b)		-0.166382	-0.249 to -0.083	9.76936e-05	0.000467964	-0.165287	-0.251 to -0.093
PC(P-18:0/18:2)		-0.247862	-0.332 to -0.164	1.33555e-08	2.25302e-07	-0.246295	-0.334 to -0.172
PC(P-18:0/20:4)		-0.177786	-0.262 to -0.094	3.96575e-05	0.000224629	-0.175689	-0.264 to -0.097
PC(P-18:0/22:5)		-0.0796815	-0.164 to 0.005	0.065302	0.109923	-0.0785771	-0.16 to 0.002
PC(P-18:0/22:6)		-0.107034	-0.191 to -0.023	0.012458	0.0273865	-0.1078	-0.186 to -0.025
PC(P-18:1/18:1)		-0.178583	-0.264 to -0.093	4.74161e-05	0.000260957	-0.176585	-0.267 to -0.099
PC(P-18:1/22:6)		-0.18001	-0.263 to -0.097	2.59718e-05	0.000159953	-0.178786	-0.279 to -0.104
PC(P-20:0/20:4)		-0.097178	-0.182 to -0.012	0.0256771	0.0500979	-0.0964298	-0.178 to -0.02
PC(P-35:2)(a)		-0.200872	-0.285 to -0.117	3.3244e-06	2.55419e-05	-0.198685	-0.282 to -0.119
PC(P-35:2)(b)		-0.172386	-0.258 to -0.087	8.43597e-05	0.000413399	-0.170541	-0.261 to -0.086
PC(P-36:3)		-0.221772	-0.307 to -0.137	4.18759e-07	4.27575e-06	-0.220216	-0.306 to -0.14
PC(P-38:5) (a)		-0.224287	-0.308 to -0.141	2.04306e-07	2.23298e-06	-0.223009	-0.316 to -0.145
PC(P-38:5) (b)		-0.162103	-0.246 to -0.078	0.000181908	0.000775606	-0.163179	-0.244 to -0.079
LPC(14:0) [sn1]		-0.177623	-0.251 to -0.104	2.83798e-06	2.24722e-05	-0.175344	-0.251 to -0.11
LPC(14:0) [sn2]		-0.175216	-0.249 to -0.101	4.66925e-06	3.48398e-05	-0.172895	-0.251 to -0.109
LPC(15-MHDA) [sn1] [104_sn1]		-0.168253	-0.241 to -0.095	7.40953e-06	5.37364e-05	-0.167043	-0.237 to -0.103
LPC(15-MHDA) [sn1] / LPC(17:0) [sn2]		-0.167716	-0.237 to -0.099	2.43112e-06	2.00697e-05	-0.166092	-0.232 to -0.107
LPC(15-MHDA) [sn2]		-0.173265	-0.247 to -0.099	5.37557e-06	3.9728e-05	-0.172972	-0.242 to -0.109
LPC(15:0) [sn1]		-0.152319	-0.223 to -0.081	2.95997e-05	0.000175339	-0.15165	-0.225 to -0.086
LPC(15:0) [sn2]		-0.158755	-0.234 to -0.084	3.74334e-05	0.00021359	-0.158949	-0.235 to -0.091
LPC(16:0) [sn1]		-0.172208	-0.231 to -0.114	1.42837e-08	2.30279e-07	-0.17082	-0.231 to -0.116
LPC(16:0) [sn2]		-0.149452	-0.206 to -0.092	3.9472e-07	4.08403e-06	-0.146895	-0.208 to -0.096
LPC(16:1) [sn1]		-0.192807	-0.261 to -0.124	5.29055e-08	6.73028e-07	-0.192588	-0.254 to -0.13
LPC(16:1) [sn2]		-0.205672	-0.28 to -0.132	8.21456e-08	9.65833e-07	-0.20644	-0.27 to -0.138
LPC(17:0) [sn1]		-0.15897	-0.222 to -0.096	9.33837e-07	8.52538e-06	-0.160604	-0.218 to -0.097
LPC(17:1) (a) [sn1] [104_sn1]		-0.184006	-0.257 to -0.111	1.05058e-06	9.37067e-06	-0.184218	-0.248 to -0.117
LPC(17:1) [sn1] (a) / LPC(17:1) [sn2] (b)		-0.18825	-0.263 to -0.114	1.07493e-06	9.4789e-06	-0.188308	-0.261 to -0.117
LPC(17:1) [sn1] (b)		-0.152408	-0.237 to -0.068	0.000422421	0.00157595	-0.151911	-0.228 to -0.073
LPC(17:1) [sn2] (a)		-0.206124	-0.282 to -0.131	1.36581e-07	1.55864e-06	-0.20616	-0.273 to -0.139
LPC(18:0) [sn1]		-0.137759	-0.199 to -0.077	1.08455e-05	7.51439e-05	-0.138036	-0.195 to -0.078
LPC(18:0) [sn2]		-0.15696	-0.218 to -0.096	6.32304e-07	6.13335e-06	-0.155145	-0.218 to -0.1
LPC(18:1) [sn1]		-0.188739	-0.256 to -0.121	6.10618e-08	7.3925e-07	-0.187134	-0.256 to -0.124
LPC(18:1) [sn2]		-0.221951	-0.294 to -0.15	3.1842e-09	6.17735e-08	-0.218558	-0.296 to -0.156
LPC(18:2) [sn1]		-0.270651	-0.351 to -0.19	1.25851e-10	4.6505e-09	-0.268236	-0.339 to -0.196
LPC(18:2) [sn2]		-0.288413	-0.37 to -0.207	1.48651e-11	1.44192e-09	-0.286519	-0.36 to -0.213
LPC(18:3) (a) [sn1] [104_sn1]		-0.1795	-0.262 to -0.097	2.22142e-05	0.000140148	-0.178455	-0.268 to -0.102
LPC(18:3) [sn1] (a)/LPC(18:3) [sn2] (b)		-0.186573	-0.269 to -0.104	1.25663e-05	8.33459e-05	-0.185603	-0.269 to -0.1
LPC(18:3) [sn1] (b)		-0.175016	-0.26 to -0.09	6.20338e-05	0.000327471	-0.175902	-0.26 to -0.092
LPC(18:3) [sn2] (a)		-0.181744	-0.266 to -0.097	2.81564e-05	0.000170698	-0.181495	-0.253 to -0.103
LPC(19:0) (a) [sn1] [104_sn1]		-0.215001	-0.284 to -0.146	1.92177e-09	3.92446e-08	-0.21389	-0.29 to -0.153
LPC(19:0) [sn1] (a) / LPC(19:0) [sn2] (b)		-0.227507	-0.292 to -0.163	1.80557e-11	1.50174e-09	-0.226225	-0.291 to -0.169
LPC(19:0) [sn1] (b)		-0.222937	-0.289 to -0.157	1.1419e-10	4.6505e-09	-0.221572	-0.289 to -0.161
LPC(19:0) [sn2] (a)		-0.220565	-0.292 to -0.15	2.23444e-09	4.44597e-08	-0.219866	-0.284 to -0.149
LPC(19:1) (a)		-0.199598	-0.268 to -0.131	1.70522e-08	2.54472e-07	-0.199143	-0.264 to -0.138
LPC(19:1) (b)		-0.176291	-0.244 to -0.109	4.30473e-07	4.33828e-06	-0.176733	-0.234 to -0.11
LPC(19:1) (c)		-0.155447	-0.233 to -0.078	9.69803e-05	0.000467433	-0.1551	-0.225 to -0.08
LPC(20:0) [sn1]		-0.205126	-0.27 to -0.14	1.53929e-09	3.51321e-08	-0.20307	-0.266 to -0.15
LPC(20:0) [sn2]		-0.222905	-0.289 to -0.157	8.94973e-11	4.08529e-09	-0.219994	-0.288 to -0.161
LPC(20:1) [sn1]		-0.114382	-0.171 to -0.058	7.45444e-05	0.000378081	-0.111242	-0.171 to -0.066
LPC(20:1) [sn2]		-0.124835	-0.186 to -0.063	8.02418e-05	0.000396609	-0.123351	-0.186 to -0.074
LPC(20:2) [sn1]		-0.176279	-0.241 to -0.111	1.65067e-07	1.8564e-06	-0.174713	-0.236 to -0.116
LPC(20:2) [sn2]		-0.17874	-0.249 to -0.109	8.29569e-07	7.66363e-06	-0.17841	-0.25 to -0.116
LPC(20:3) [sn1]		-0.137889	-0.219 to -0.057	0.000879553	0.00292933	-0.135513	-0.218 to -0.057
LPC(20:3) [sn2]		-0.148227	-0.231 to -0.065	0.000513709	0.00183704	-0.148725	-0.23 to -0.07
LPC(20:4) [sn1]		-0.104981	-0.18 to -0.029	0.00665602	0.0161914	-0.104865	-0.168 to -0.036
LPC(20:4) [sn2]		-0.123391	-0.203 to -0.044	0.00235347	0.00671432	-0.123411	-0.198 to -0.048
LPC(20:5) [sn1]		-0.0828421	-0.166 to 0.001	0.0523921	0.0914302	-0.0823659	-0.167 to -0.012
LPC(20:5) [sn2]		-0.0869909	-0.172 to -0.002	0.044294	0.0798299	-0.0880616	-0.158 to -0.002
LPC(22:0) [sn1]		-0.298598	-0.38 to -0.218	1.89829e-12	7.36536e-10	-0.296887	-0.382 to -0.222
LPC(22:0) [sn2]		-0.289621	-0.372 to -0.207	1.93523e-11	1.50174e-09	-0.28722	-0.367 to -0.214
LPC(22:1) [sn1]		-0.223295	-0.291 to -0.155	3.03645e-10	8.41531e-09	-0.22274	-0.282 to -0.157
LPC(22:1) [sn2]		-0.20379	-0.275 to -0.133	3.41844e-08	4.73698e-07	-0.20353	-0.274 to -0.142
LPC(22:4) [sn1]		-0.0923918	-0.164 to -0.021	0.0113732	0.025361	-0.0926354	-0.156 to -0.027
LPC(22:4) [sn2]		-0.106362	-0.183 to -0.03	0.00675103	0.0163712	-0.105436	-0.174 to -0.038
LPC(22:5) (n3) [sn1] [104_sn1]		-0.11946	-0.196 to -0.042	0.00248031	0.00699899	-0.120373	-0.191 to -0.05
LPC(22:5) [sn1] (n3)/LPC(22:5) [sn2] (n6)		-0.12027	-0.198 to -0.043	0.00250016	0.00702944	-0.120304	-0.19 to -0.048
LPC(22:5) [sn1] (n6)		-0.101165	-0.18 to -0.022	0.0126615	0.0277552	-0.101299	-0.169 to -0.035
LPC(22:5) [sn2] (n3)		-0.141005	-0.222 to -0.06	0.000699287	0.00243339	-0.13992	-0.222 to -0.068
LPC(22:6) [sn1]		-0.121969	-0.2 to -0.044	0.00238078	0.00676734	-0.119125	-0.197 to -0.055
LPC(22:6) [sn2]		-0.13676	-0.217 to -0.057	0.000858359	0.00288349	-0.135881	-0.213 to -0.063
LPC(24:0) [sn1]		-0.281708	-0.366 to -0.198	1.21132e-10	4.6505e-09	-0.279225	-0.357 to -0.203
LPC(24:0) [sn2]		-0.29633	-0.38 to -0.213	1.10364e-11	1.42737e-09	-0.293323	-0.373 to -0.215
LPC(26:0) [sn1]		-0.187478	-0.273 to -0.102	1.98367e-05	0.000127217	-0.187217	-0.275 to -0.109
LPC(26:0) [sn2]		-0.205762	-0.291 to -0.121	2.63418e-06	2.12929e-05	-0.205083	-0.295 to -0.126
LPC(O-16:0)		-0.0749776	-0.129 to -0.021	0.00702629	0.0169329	-0.0727872	-0.132 to -0.021
LPC(O-18:0)		-0.0997769	-0.16 to -0.039	0.00133144	0.00403051	-0.0991314	-0.164 to -0.035
LPC(O-18:1)		-0.0219569	-0.073 to 0.029	0.401968	0.491223	-0.0200582	-0.069 to 0.025
LPC(O-20:0)		-0.155323	-0.228 to -0.083	3.21212e-05	0.000186015	-0.155362	-0.227 to -0.085
LPC(O-20:1)		-0.0321727	-0.091 to 0.026	0.281544	0.36719	-0.0323286	-0.089 to 0.025
LPC(O-22:0)		-0.190135	-0.274 to -0.106	1.14759e-05	7.81169e-05	-0.188096	-0.27 to -0.108
LPC(O-22:1)		-0.0962483	-0.174 to -0.018	0.0158848	0.0336792	-0.0926156	-0.175 to -0.025
LPC(O-24:0)		-0.17169	-0.258 to -0.085	0.000117955	0.00054484	-0.171523	-0.253 to -0.09
LPC(O-24:1)		-0.111529	-0.197 to -0.026	0.010578	0.0237928	-0.109736	-0.191 to -0.04
LPC(O-24:2)		-0.0782414	-0.157 to 0.001	0.052431	0.0914302	-0.0767871	-0.158 to -0.01
LPC(P-16:0)		-0.187646	-0.243 to -0.132	9.67307e-11	4.17017e-09	-0.185258	-0.247 to -0.139
LPC(P-17:0) (a)		-0.178063	-0.246 to -0.11	4.43389e-07	4.41115e-06	-0.176229	-0.246 to -0.118
LPC(P-17:0) (b)		-0.174911	-0.239 to -0.111	1.34682e-07	1.55864e-06	-0.172132	-0.244 to -0.118
LPC(P-18:0)		-0.202017	-0.267 to -0.137	1.70071e-09	3.66597e-08	-0.201027	-0.267 to -0.14
LPC(P-18:1)		-0.14409	-0.197 to -0.091	1.78459e-07	1.97835e-06	-0.142231	-0.198 to -0.093
LPC(P-20:0)		-0.24848	-0.324 to -0.173	2.8338e-10	8.41531e-09	-0.247769	-0.325 to -0.18
PE(15-MHDA_18:1)		-0.0954778	-0.182 to -0.009	0.0317164	0.0603234	-0.0979696	-0.174 to -0.002
PE(15-MHDA_18:2)		-0.114536	-0.202 to -0.027	0.0103932	0.0235136	-0.11593	-0.194 to -0.032
PE(15-MHDA_20:4)		-0.081905	-0.169 to 0.005	0.0652154	0.109923	-0.0815203	-0.158 to 0
PE(15-MHDA_22:6)		-0.101814	-0.188 to -0.016	0.0209435	0.0431091	-0.102398	-0.173 to -0.026
PE(16:0_16:0)		-0.127183	-0.211 to -0.043	0.00317488	0.00870568	-0.127154	-0.207 to -0.048
PE(16:0_16:1)		-0.0265486	-0.113 to 0.06	0.548412	0.634102	-0.0281239	-0.12 to 0.058
PE(16:0_18:1)		-0.0504954	-0.138 to 0.037	0.257583	0.343443	-0.0506887	-0.138 to 0.039
PE(16:0_18:2)		-0.0880873	-0.175 to -0.001	0.0487272	0.0867255	-0.0875761	-0.176 to 0.001
PE(16:0_18:3) (a)		-0.083223	-0.17 to 0.003	0.0600148	0.103034	-0.0829895	-0.162 to 0.006
PE(16:0_18:3) (b)		-0.0142295	-0.1 to 0.071	0.744629	0.805903	-0.0148899	-0.093 to 0.077
PE(16:0_20:3)		-0.0999766	-0.188 to -0.012	0.0257976	0.0501728	-0.102204	-0.183 to -0.009
PE(16:0_20:4)		-0.0251229	-0.112 to 0.061	0.569737	0.653052	-0.0256635	-0.109 to 0.054
PE(16:0_20:5)		-0.0521674	-0.139 to 0.035	0.240187	0.324148	-0.0530826	-0.128 to 0.036
PE(16:0_22:6)		0.024288	-0.062 to 0.11	0.580159	0.660122	0.0218072	-0.05 to 0.118
PE(16:1_18:2)		-0.128738	-0.216 to -0.041	0.00418543	0.0109726	-0.128887	-0.214 to -0.038
PE(16:1_20:4)		-0.103764	-0.191 to -0.017	0.0199838	0.0415748	-0.103045	-0.182 to -0.018
PE(17:0_18:1)		-0.0994306	-0.186 to -0.012	0.0255591	0.0500856	-0.0998062	-0.178 to -0.01
PE(17:0_18:2)		-0.128334	-0.216 to -0.041	0.00410645	0.0108388	-0.127106	-0.21 to -0.048
PE(17:0_20:4)		-0.0575031	-0.145 to 0.03	0.195984	0.27304	-0.0576424	-0.139 to 0.021
PE(17:0_22:6)		-0.0691466	-0.155 to 0.017	0.115454	0.174303	-0.0707445	-0.148 to 0.014
PE(18:0_18:1)		-0.124012	-0.211 to -0.037	0.00545493	0.0137436	-0.124415	-0.207 to -0.039
PE(18:0_18:2)		-0.11485	-0.202 to -0.028	0.0100376	0.0228421	-0.114597	-0.199 to -0.038
PE(18:0_20:3) (a)		-0.0521826	-0.139 to 0.035	0.240855	0.324486	-0.0521739	-0.131 to 0.033
PE(18:0_20:3) (b)		-0.00220576	-0.088 to 0.084	0.960031	0.972564	-0.00192447	-0.084 to 0.077
PE(18:0_20:4)		-0.0296126	-0.116 to 0.057	0.504184	0.590116	-0.0279204	-0.117 to 0.045
PE(18:0_22:4)		0.00106736	-0.084 to 0.086	0.980316	0.984149	0.00126076	-0.072 to 0.085
PE(18:0_22:5) (n3)		-0.0180911	-0.104 to 0.068	0.680937	0.754867	-0.0195234	-0.106 to 0.072
PE(18:0_22:5) (n6)		-0.00621735	-0.093 to 0.081	0.888627	0.923125	-0.00646875	-0.083 to 0.077
PE(18:0_22:6)		-0.0039938	-0.089 to 0.081	0.927081	0.95045	-0.00406922	-0.08 to 0.084
PE(18:1_18:1)		-0.141706	-0.229 to -0.055	0.00151266	0.00451471	-0.13999	-0.234 to -0.059
PE(18:1_18:2)		-0.164363	-0.251 to -0.077	0.00023447	0.000957624	-0.164932	-0.251 to -0.087
PE(18:1_22:6) (a)		-0.123718	-0.21 to -0.038	0.00497647	0.0126614	-0.123918	-0.206 to -0.04
PE(18:1_22:6) (b)		-0.0619278	-0.148 to 0.024	0.159972	0.23074	-0.0635113	-0.138 to 0.021
PE(20:0_20:4)		-0.126479	-0.2 to -0.053	0.000771561	0.00263688	-0.12593	-0.197 to -0.064
PE(36:0)		-0.00636888	-0.092 to 0.079	0.88439	0.920263	-0.00433018	-0.098 to 0.082
PE(38:5) (a)		-0.107148	-0.193 to -0.021	0.0151333	0.0324404	-0.106392	-0.192 to -0.026
PE(38:5) (b)		-0.0622163	-0.149 to 0.024	0.159735	0.23074	-0.0619595	-0.143 to 0.024
PE(O-16:0/18:2)		-0.297498	-0.381 to -0.214	9.29942e-12	1.42737e-09	-0.298578	-0.378 to -0.216
PE(O-16:0/20:3)		-0.227106	-0.313 to -0.142	2.79867e-07	2.97503e-06	-0.229009	-0.305 to -0.142
PE(O-16:0/20:4)		-0.30261	-0.386 to -0.219	3.45886e-12	8.94692e-10	-0.300889	-0.381 to -0.227
PE(O-16:0/22:4)		-0.143635	-0.23 to -0.057	0.00126017	0.00391157	-0.145508	-0.227 to -0.048
PE(O-16:0/22:6)		-0.280515	-0.364 to -0.198	8.83404e-11	4.08529e-09	-0.281225	-0.357 to -0.201
PE(O-18:0/20:4)		-0.24849	-0.333 to -0.164	1.45408e-08	2.30279e-07	-0.24681	-0.337 to -0.169
PE(O-18:0/22:5)		-0.175815	-0.262 to -0.09	7.16476e-05	0.000368202	-0.177741	-0.255 to -0.088
PE(O-18:0/22:6)		-0.254159	-0.338 to -0.171	4.8235e-09	8.70474e-08	-0.254631	-0.328 to -0.169
PE(O-18:1/18:2)		-0.289212	-0.372 to -0.206	2.46476e-11	1.73877e-09	-0.289348	-0.367 to -0.215
PE(O-18:1/22:6)		-0.23359	-0.317 to -0.15	5.81551e-08	7.27877e-07	-0.233286	-0.314 to -0.149
PE(O-34:1)		-0.275342	-0.359 to -0.191	2.93052e-10	8.41531e-09	-0.274245	-0.365 to -0.194
PE(O-36:5)		-0.259739	-0.344 to -0.175	3.53834e-09	6.69695e-08	-0.26201	-0.342 to -0.184
PE(O-38:5) (a)		-0.249413	-0.334 to -0.165	1.30964e-08	2.25302e-07	-0.249738	-0.33 to -0.164
PE(O-38:5) (b)		-0.241419	-0.326 to -0.156	4.27716e-08	5.72255e-07	-0.244197	-0.323 to -0.15
PE(P-15:0/20:4) (a)		0.013669	-0.072 to 0.1	0.755564	0.81433	0.0143734	-0.066 to 0.098
PE(P-15:0/20:4) (b)		-0.0554395	-0.143 to 0.032	0.214059	0.295044	-0.0572612	-0.138 to 0.028
PE(P-15:0/22:6) (a)		-0.0168276	-0.103 to 0.07	0.702595	0.767652	-0.0166364	-0.091 to 0.063
PE(P-15:0/22:6) (b)		-0.147239	-0.233 to -0.062	0.000774755	0.00263688	-0.14625	-0.23 to -0.065
PE(P-16:0/18:1)		-0.0904815	-0.176 to -0.004	0.0396783	0.0734854	-0.0903704	-0.185 to -0.008
PE(P-16:0/18:2)		-0.169284	-0.255 to -0.084	0.000114638	0.000535897	-0.170018	-0.265 to -0.091
PE(P-16:0/18:3)		-0.115355	-0.201 to -0.03	0.00869943	0.0201515	-0.115106	-0.209 to -0.019
PE(P-16:0/20:3) (a)		-0.156873	-0.243 to -0.071	0.000387924	0.00146131	-0.157068	-0.25 to -0.062
PE(P-16:0/20:3) (b)		-0.152996	-0.238 to -0.068	0.000470755	0.0017146	-0.152823	-0.237 to -0.059
PE(P-16:0/20:4)		-0.165101	-0.25 to -0.08	0.000160819	0.000701097	-0.163063	-0.245 to -0.088
PE(P-16:0/20:5)		-0.160527	-0.246 to -0.075	0.000269412	0.00108887	-0.160647	-0.248 to -0.075
PE(P-16:0/22:4)		-0.0856471	-0.169 to -0.002	0.0443385	0.0798299	-0.0831067	-0.163 to -0.008
PE(P-16:0/22:5) (n3)		-0.118852	-0.205 to -0.033	0.00707154	0.0169368	-0.119197	-0.201 to -0.022
PE(P-16:0/22:5) (n6)		-0.112251	-0.2 to -0.025	0.0124214	0.0273835	-0.112505	-0.195 to -0.032
PE(P-16:0/22:6)		-0.17794	-0.263 to -0.093	4.48543e-05	0.00025041	-0.17739	-0.256 to -0.101
PE(P-17:0/20:4) (a)		-0.143135	-0.227 to -0.059	0.000909563	0.00301633	-0.141667	-0.225 to -0.058
PE(P-17:0/20:4) (b)		-0.187532	-0.271 to -0.104	1.303e-05	8.49689e-05	-0.188885	-0.269 to -0.109
PE(P-17:0/22:6) (a)		-0.162068	-0.246 to -0.078	0.000168768	0.000731641	-0.160852	-0.251 to -0.09
PE(P-17:0/22:6) (b)		-0.173352	-0.257 to -0.09	5.57034e-05	0.000298109	-0.172977	-0.251 to -0.092
PE(P-18:0/18:1)		-0.10942	-0.196 to -0.023	0.0131056	0.0286478	-0.109942	-0.202 to -0.026
PE(P-18:0/18:2)		-0.183329	-0.269 to -0.098	3.18186e-05	0.000185648	-0.183141	-0.272 to -0.108
PE(P-18:0/18:3)		-0.121292	-0.207 to -0.036	0.00576013	0.0143725	-0.121306	-0.215 to -0.019
PE(P-18:0/20:3) (a)		-0.151832	-0.239 to -0.065	0.000659398	0.00231535	-0.151525	-0.241 to -0.064
PE(P-18:0/20:3) (b)		-0.143322	-0.229 to -0.057	0.00115175	0.00363317	-0.14211	-0.227 to -0.057
PE(P-18:0/20:4)		-0.152732	-0.237 to -0.069	0.000408997	0.00153325	-0.151773	-0.23 to -0.078
PE(P-18:0/20:5)		-0.151903	-0.237 to -0.066	0.000533447	0.00189887	-0.15108	-0.24 to -0.071
PE(P-18:0/22:4)		-0.0801693	-0.159 to -0.001	0.0465549	0.0832411	-0.0789549	-0.15 to -0.011
PE(P-18:0/22:5) (n3)		-0.120252	-0.206 to -0.035	0.00614518	0.0151103	-0.119842	-0.213 to -0.031
PE(P-18:0/22:5) (n6)		-0.122139	-0.209 to -0.035	0.00615699	0.0151103	-0.121983	-0.2 to -0.037
PE(P-18:0/22:6)		-0.160702	-0.244 to -0.077	0.000189848	0.000796336	-0.15938	-0.246 to -0.083
PE(P-18:1/18:1)		-0.168264	-0.254 to -0.083	0.000135396	0.000618043	-0.170459	-0.247 to -0.076
PE(P-18:1/18:1) (a)		-0.184106	-0.27 to -0.099	2.8414e-05	0.000170925	-0.18479	-0.263 to -0.104
PE(P-18:1/18:1) (b)		-0.0745613	-0.161 to 0.012	0.0923648	0.144216	-0.0730608	-0.161 to 0.009
PE(P-18:1/18:2) (a)		-0.206342	-0.291 to -0.122	2.27673e-06	1.89972e-05	-0.205995	-0.285 to -0.121
PE(P-18:1/18:2) (b)		-0.135342	-0.222 to -0.049	0.00225486	0.00645672	-0.133966	-0.225 to -0.052
PE(P-18:1/18:3)		-0.154642	-0.241 to -0.069	0.000461825	0.00169846	-0.153522	-0.241 to -0.049
PE(P-18:1/20:3) (a)		-0.184398	-0.27 to -0.099	2.80991e-05	0.000170698	-0.187767	-0.262 to -0.089
PE(P-18:1/20:3) (b)		-0.127744	-0.214 to -0.041	0.00402889	0.0107069	-0.125173	-0.215 to -0.034
PE(P-18:1/20:4) (a)		-0.184999	-0.27 to -0.1	2.31162e-05	0.000144663	-0.185392	-0.265 to -0.107
PE(P-18:1/20:4) (b)		-0.113082	-0.198 to -0.028	0.00949488	0.0216707	-0.110348	-0.194 to -0.035
PE(P-18:1/20:5) (a)		-0.192907	-0.278 to -0.108	1.01114e-05	7.13311e-05	-0.193592	-0.285 to -0.113
PE(P-18:1/20:5) (b)		-0.112245	-0.199 to -0.026	0.0111777	0.0249968	-0.112025	-0.193 to -0.037
PE(P-18:1/22:4)		-0.136627	-0.221 to -0.052	0.00166959	0.00494505	-0.13961	-0.212 to -0.056
PE(P-18:1/22:5) (a)		-0.144176	-0.229 to -0.059	0.000952427	0.00314503	-0.141128	-0.227 to -0.063
PE(P-18:1/22:5) (b)		-0.16602	-0.252 to -0.08	0.000171492	0.000735236	-0.165281	-0.247 to -0.096
PE(P-18:1/22:6) (a)		-0.153105	-0.237 to -0.069	0.000387096	0.00146131	-0.151469	-0.239 to -0.078
PE(P-18:1/22:6) (b)		-0.121305	-0.206 to -0.036	0.0052911	0.0133743	-0.118855	-0.2 to -0.053
PE(P-19:0/20:4) (a)		-0.0733042	-0.158 to 0.012	0.0910696	0.142768	-0.0737572	-0.153 to 0.003
PE(P-19:0/20:4) (b)		-0.127254	-0.211 to -0.043	0.00320508	0.00875754	-0.126144	-0.199 to -0.043
PE(P-20:0/18:1)		-0.0713604	-0.158 to 0.015	0.107503	0.164866	-0.0707828	-0.159 to 0.014
PE(P-20:0/18:2)		-0.132273	-0.219 to -0.046	0.00278117	0.00770783	-0.13083	-0.22 to -0.05
PE(P-20:0/20:4)		-0.0751474	-0.16 to 0.01	0.0834867	0.133304	-0.073671	-0.155 to -0.005
PE(P-20:0/22:6)		-0.0488839	-0.134 to 0.036	0.260814	0.346561	-0.049504	-0.124 to 0.029
PE(P-20:1/20:4)		0.0360986	-0.051 to 0.123	0.418105	0.507746	0.0351902	-0.046 to 0.123
PE(P-20:1/22:6)		0.0390398	-0.047 to 0.125	0.37221	0.464801	0.0393976	-0.046 to 0.123
LPE(16:0) [sn1]		-0.247061	-0.322 to -0.172	2.04922e-10	6.91387e-09	-0.244567	-0.323 to -0.179
LPE(16:0) [sn2]		-0.24843	-0.324 to -0.173	2.44243e-10	7.86547e-09	-0.249199	-0.323 to -0.176
LPE(17:0) [sn1]		-0.146835	-0.233 to -0.061	0.000879455	0.00292933	-0.144611	-0.241 to -0.066
LPE(17:0) [sn2]		-0.212795	-0.297 to -0.128	1.02567e-06	9.25487e-06	-0.212702	-0.303 to -0.13
LPE(18:0) [sn1]		-0.155794	-0.221 to -0.09	3.78691e-06	2.88102e-05	-0.152865	-0.227 to -0.092
LPE(18:0) [sn2]		-0.173116	-0.24 to -0.106	5.34756e-07	5.25279e-06	-0.16972	-0.244 to -0.108
LPE(18:1) [sn1]		-0.179769	-0.262 to -0.098	2.02544e-05	0.000128831	-0.179514	-0.253 to -0.1
LPE(18:1) [sn2]		-0.18756	-0.271 to -0.104	1.25247e-05	8.33459e-05	-0.1865	-0.268 to -0.111
LPE(18:2) [sn1]		-0.248544	-0.333 to -0.164	1.57273e-08	2.39301e-07	-0.247584	-0.321 to -0.169
LPE(18:2) [sn2]		-0.256675	-0.341 to -0.172	5.39169e-09	9.50897e-08	-0.255649	-0.331 to -0.178
LPE(20:4) [sn1]		-0.100347	-0.188 to -0.013	0.0247236	0.0489426	-0.101647	-0.186 to -0.018
LPE(20:4) [sn2]		-0.121705	-0.209 to -0.035	0.00644449	0.0157262	-0.120724	-0.209 to -0.036
LPE(22:6) [sn1]		-0.14588	-0.231 to -0.061	0.000799	0.00270753	-0.147057	-0.224 to -0.064
LPE(22:6) [sn2]		-0.118271	-0.204 to -0.033	0.00693128	0.016756	-0.117875	-0.197 to -0.031
LPE(P-16:0)		-0.0815867	-0.14 to -0.023	0.00617264	0.0151103	-0.0815056	-0.152 to -0.023
LPE(P-18:0)		-0.111571	-0.172 to -0.051	0.000323381	0.00124847	-0.112038	-0.162 to -0.056
LPE(P-18:1)		-0.071264	-0.131 to -0.011	0.0203842	0.0421817	-0.069301	-0.139 to -0.017
LPE(P-20:0)		-0.132992	-0.201 to -0.065	0.000145174	0.000640086	-0.131105	-0.206 to -0.068
PI (38:5) (b)		-0.145573	-0.232 to -0.059	0.000997505	0.00327993	-0.143334	-0.225 to -0.068
PI(15-MHDA_20:4)\PI(17:0_20:4)		-0.209983	-0.295 to -0.125	1.83897e-06	1.56818e-05	-0.210982	-0.287 to -0.129
PI(16:0_16:1)		0.0338578	-0.053 to 0.121	0.446297	0.534455	0.0335578	-0.048 to 0.132
PI(16:0_20:3) (a)		-0.180234	-0.267 to -0.094	5.18446e-05	0.000279385	-0.180356	-0.253 to -0.093
PI(16:0_20:3) (b)		-0.138025	-0.224 to -0.052	0.00180644	0.00533004	-0.139042	-0.224 to -0.055
PI(16:0_20:4)		-0.195609	-0.282 to -0.11	1.03052e-05	7.20437e-05	-0.195462	-0.277 to -0.117
PI(16:0/16:0)		0.00532043	-0.083 to 0.093	0.905591	0.933251	0.00662341	-0.08 to 0.095
PI(17:0_18:1)		0.0115821	-0.076 to 0.099	0.795331	0.845051	0.0111273	-0.075 to 0.089
PI(17:0_18:2)		-0.0410051	-0.129 to 0.047	0.362153	0.456219	-0.0366994	-0.128 to 0.038
PI(18:0_18:1)		-0.160354	-0.246 to -0.074	0.000289059	0.00113863	-0.160337	-0.237 to -0.07
PI(18:0_20:2)		-0.279001	-0.363 to -0.195	1.85966e-10	6.55952e-09	-0.278694	-0.354 to -0.202
PI(18:0_20:3) (a)		-0.134099	-0.221 to -0.047	0.00260244	0.00729059	-0.133323	-0.223 to -0.054
PI(18:0_20:3) (b)		-0.185946	-0.27 to -0.102	1.62737e-05	0.000105237	-0.184985	-0.277 to -0.104
PI(18:0_20:4)		-0.273301	-0.356 to -0.19	2.53398e-10	7.86547e-09	-0.271954	-0.342 to -0.201
PI(18:0_22:4)		-0.175661	-0.261 to -0.09	6.65929e-05	0.000349163	-0.175812	-0.261 to -0.087
PI(18:0_22:5) (n3)		-0.100729	-0.188 to -0.014	0.0239395	0.0477133	-0.101733	-0.184 to -0.011
PI(18:0_22:5) (n6)		-0.0719058	-0.159 to 0.015	0.107196	0.164722	-0.0720085	-0.146 to 0.008
PI(18:0_22:6)		-0.0696785	-0.156 to 0.017	0.113669	0.17228	-0.0687449	-0.154 to 0.011
PI(18:1_18:2)		-0.136173	-0.223 to -0.05	0.00211056	0.00611119	-0.135808	-0.219 to -0.06
PI(20:0_20:4)		-0.19357	-0.279 to -0.109	9.96274e-06	7.09274e-05	-0.194868	-0.272 to -0.11
PI(34:0)		-0.0279142	-0.115 to 0.06	0.531766	0.616816	-0.0253997	-0.122 to 0.056
PI(34:1)		-0.0580174	-0.145 to 0.029	0.193691	0.271307	-0.0581871	-0.154 to 0.028
PI(36:2)		-0.0482651	-0.136 to 0.039	0.279732	0.365843	-0.0476348	-0.13 to 0.043
PI(37:6)		-0.240297	-0.326 to -0.155	6.00196e-08	7.3925e-07	-0.239491	-0.333 to -0.163
PI(38:5) (a)		-0.144901	-0.232 to -0.058	0.00116686	0.00366593	-0.144274	-0.229 to -0.058
PI(38:6)		-0.0234155	-0.11 to 0.063	0.595753	0.67367	-0.0220378	-0.119 to 0.06
PI(39:6)		-0.0517666	-0.139 to 0.035	0.242926	0.326708	-0.0516048	-0.136 to 0.033
PIP1(38:4)		-0.0917914	-0.17 to -0.014	0.0213252	0.0437787	-0.0907509	-0.174 to -0.021
LPI(18:0) [sn1]		-0.108223	-0.192 to -0.024	0.0118286	0.0263008	-0.106853	-0.188 to -0.031
LPI(18:0) [sn2]		-0.143527	-0.229 to -0.058	0.00108388	0.00349002	-0.144325	-0.225 to -0.057
LPI(18:1) [sn1]		-0.0647686	-0.148 to 0.019	0.129826	0.19153	-0.0648273	-0.143 to 0.022
LPI(18:1) [sn2]		-0.0390173	-0.125 to 0.047	0.373159	0.464801	-0.0391222	-0.13 to 0.044
LPI(18:2) [sn1]		0.0578252	-0.027 to 0.143	0.182469	0.257916	0.0596684	-0.017 to 0.131
LPI(18:2) [sn2]		0.0247365	-0.062 to 0.111	0.576541	0.657935	0.0241436	-0.058 to 0.104
LPI(20:4) [sn1]		0.00238164	-0.082 to 0.087	0.955992	0.97228	0.0021341	-0.076 to 0.084
LPI(20:4) [sn2]		-0.104445	-0.19 to -0.019	0.0165626	0.0350207	-0.105179	-0.18 to -0.012
PS(36:1)		0.070867	0.008 to 0.134	0.028448	0.0546427	0.07151	0.007 to 0.13
PS(36:2)		0.0928921	0.032 to 0.154	0.00297558	0.00821727	0.0921405	0.035 to 0.156
PS(38:3)		0.0282612	-0.035 to 0.092	0.3846	0.475239	0.028625	-0.038 to 0.095
PS(38:4)		0.0252865	-0.036 to 0.087	0.422656	0.512471	0.0263481	-0.049 to 0.083
PS(38:5)		0.0302788	-0.034 to 0.094	0.354799	0.44841	0.0326012	-0.05 to 0.091
PS(40:5)		0.0455895	-0.023 to 0.115	0.195529	0.27304	0.0466687	-0.034 to 0.118
PS(40:6)		-0.010285	-0.086 to 0.065	0.789957	0.842042	-0.00800653	-0.105 to 0.073
PG(34:1)		-0.159809	-0.246 to -0.074	0.000302899	0.00118115	-0.161359	-0.245 to -0.078
PG(36:1)		-0.133827	-0.22 to -0.048	0.00239855	0.00679297	-0.13071	-0.219 to -0.048
PG(36:2)		-0.0264831	-0.114 to 0.061	0.551329	0.635708	-0.0243909	-0.115 to 0.069
CE(14:0)		-0.0199496	-0.107 to 0.067	0.652885	0.730027	-0.0183943	-0.103 to 0.083
CE(15:0)		-0.00918871	-0.095 to 0.077	0.834335	0.877295	-0.0109542	-0.096 to 0.078
CE(16:0)		-0.130671	-0.217 to -0.044	0.00328782	0.00895209	-0.128581	-0.236 to -0.039
CE(16:1)		-0.0223706	-0.108 to 0.064	0.610593	0.687692	-0.0243613	-0.105 to 0.078
CE(16:2)		-0.0391741	-0.126 to 0.047	0.375796	0.467335	-0.0403088	-0.129 to 0.05
CE(17:0)		-0.123644	-0.209 to -0.038	0.004916	0.0126091	-0.121194	-0.211 to -0.041
CE(17:1)		-0.0338046	-0.12 to 0.052	0.442626	0.532523	-0.0364063	-0.11 to 0.06
CE(18:0)		-0.160669	-0.247 to -0.075	0.000272417	0.00108967	-0.158202	-0.247 to -0.07
CE(18:1)		-0.173577	-0.259 to -0.088	7.6331e-05	0.000382147	-0.174216	-0.256 to -0.087
CE(18:2)		-0.136818	-0.224 to -0.05	0.00210052	0.00610488	-0.136929	-0.221 to -0.057
CE(18:3)		-0.033332	-0.119 to 0.052	0.446115	0.534455	-0.0355116	-0.115 to 0.055
CE(20:0)		-0.120175	-0.205 to -0.035	0.00592728	0.0147422	-0.120891	-0.202 to -0.022
CE(20:1)		-0.158293	-0.244 to -0.072	0.000336009	0.00129081	-0.157337	-0.246 to -0.078
CE(20:2)		-0.127579	-0.213 to -0.042	0.0035861	0.00966256	-0.127049	-0.207 to -0.036
CE(20:3)		0.00174313	-0.085 to 0.088	0.968549	0.978437	0.00166987	-0.079 to 0.09
CE(20:4)		-0.0340082	-0.121 to 0.053	0.445399	0.534455	-0.0349398	-0.127 to 0.053
CE(20:5)		-0.0237349	-0.11 to 0.062	0.589007	0.66823	-0.0232148	-0.111 to 0.064
CE(22:0)		-0.143599	-0.23 to -0.058	0.00113326	0.00360412	-0.145024	-0.23 to -0.054
CE(22:1)		-0.102568	-0.189 to -0.016	0.0201677	0.0418453	-0.101753	-0.185 to -0.013
CE(22:4)		0.0375847	-0.049 to 0.125	0.397947	0.488619	0.0384911	-0.05 to 0.123
CE(22:5) (n3)		-0.054156	-0.141 to 0.032	0.220333	0.30155	-0.0524296	-0.15 to 0.028
CE(22:5) (n6)		-0.0295098	-0.116 to 0.057	0.505953	0.591294	-0.0303589	-0.114 to 0.055
CE(22:6)		-0.079546	-0.167 to 0.007	0.0737873	0.120914	-0.0796654	-0.168 to 0.014
CE(24:0)		-0.204707	-0.29 to -0.119	3.28836e-06	2.55419e-05	-0.206704	-0.294 to -0.11
CE(24:1)		-0.129138	-0.215 to -0.043	0.00346152	0.00935937	-0.127691	-0.211 to -0.05
CE(24:4)		-0.142449	-0.229 to -0.055	0.001416	0.00425899	-0.141566	-0.223 to -0.059
CE(24:5)		-0.169193	-0.256 to -0.083	0.000143348	0.000636672	-0.170483	-0.252 to -0.089
CE(24:6)		-0.0664331	-0.152 to 0.019	0.128004	0.189925	-0.0667994	-0.149 to 0.02
COH		-0.0665775	-0.154 to 0.021	0.137068	0.201068	-0.0659318	-0.165 to 0.016
DE(16:0)		-0.0753864	-0.162 to 0.011	0.0868719	0.137296	-0.0770538	-0.166 to 0.01
DE(18:1)		-0.0922849	-0.179 to -0.005	0.0383178	0.071306	-0.091418	-0.183 to -0.006
DE(18:2)		-0.125498	-0.212 to -0.039	0.00443555	0.0115503	-0.124805	-0.217 to -0.032
DE(20:4)		-0.0451475	-0.133 to 0.042	0.311971	0.402143	-0.0449831	-0.138 to 0.043
DE(20:5)		-0.0111864	-0.098 to 0.075	0.800118	0.848212	-0.0108579	-0.097 to 0.07
DE(22:6)		-0.111786	-0.199 to -0.025	0.0119275	0.0264449	-0.112356	-0.195 to -0.028
FA(14:0)		-0.0509418	-0.125 to 0.023	0.177779	0.253131	-0.0529684	-0.123 to 0.024
FA(15:0)		-0.0227584	-0.102 to 0.056	0.573662	0.655613	-0.0218345	-0.107 to 0.056
FA(16:0)		-0.0306159	-0.098 to 0.037	0.373117	0.464801	-0.0298897	-0.093 to 0.034
FA(16:1)		0.0158136	-0.06 to 0.092	0.68244	0.755455	0.0149968	-0.063 to 0.092
FA(16:2)		-0.0120766	-0.099 to 0.074	0.784531	0.838253	-0.0120671	-0.101 to 0.08
FA(17:0)		-0.067356	-0.151 to 0.016	0.115388	0.174303	-0.0680795	-0.156 to 0.018
FA(17:1)		-0.0458888	-0.125 to 0.033	0.254458	0.340303	-0.0446567	-0.123 to 0.039
FA(18:0)		-0.0390013	-0.126 to 0.048	0.380829	0.472081	-0.0390899	-0.118 to 0.051
FA(18:1)		-0.0347613	-0.108 to 0.039	0.354257	0.44841	-0.0355546	-0.106 to 0.043
FA(18:2)		-0.0513507	-0.121 to 0.019	0.150917	0.220135	-0.0518172	-0.117 to 0.02
FA(18:3)		-0.0579701	-0.129 to 0.013	0.111854	0.170193	-0.0552649	-0.129 to 0.02
FA(20:2)		-0.100489	-0.18 to -0.02	0.0141323	0.0307189	-0.102208	-0.179 to -0.022
FA(20:3)		-0.0614424	-0.141 to 0.018	0.129142	0.190884	-0.0619508	-0.145 to 0.02
FA(20:4)		-0.0932556	-0.174 to -0.012	0.0245595	0.0487422	-0.0934783	-0.172 to -0.021
FA(20:5)		-0.0760861	-0.161 to 0.009	0.0794909	0.127977	-0.079149	-0.158 to 0.011
FA(22:4)		-0.050054	-0.131 to 0.031	0.228655	0.311291	-0.0493772	-0.134 to 0.027
FA(22:5)		-0.113297	-0.19 to -0.036	0.00408897	0.0108295	-0.112945	-0.21 to -0.036
FA(22:6)		-0.128023	-0.204 to -0.052	0.001018	0.0033332	-0.127368	-0.231 to -0.061
AC(12:0)		0.0619676	-0.023 to 0.147	0.154963	0.225613	0.0614198	-0.025 to 0.146
AC(13:0)		-0.0375341	-0.125 to 0.05	0.398824	0.488921	-0.035407	-0.132 to 0.036
AC(14:0)		-0.0270858	-0.096 to 0.042	0.4403	0.530548	-0.0287574	-0.096 to 0.035
AC(14:1)		0.0893151	0.004 to 0.175	0.0408176	0.0750016	0.0906713	0.007 to 0.169
AC(14:2)		0.0678337	-0.018 to 0.154	0.121318	0.181751	0.0695601	-0.031 to 0.15
AC(15:0) (a)		-0.0511829	-0.129 to 0.026	0.195876	0.27304	-0.0510987	-0.122 to 0.027
AC(15:0) (b)		-0.0364265	-0.102 to 0.029	0.279112	0.365843	-0.0382907	-0.093 to 0.029
AC(16:0)		-0.0534825	-0.11 to 0.003	0.0645754	0.109173	-0.0532555	-0.11 to -0.002
AC(16:1)		0.0242547	-0.043 to 0.092	0.481304	0.570947	0.0233695	-0.036 to 0.089
AC(17:0) (a)		-0.0712066	-0.14 to -0.002	0.0442192	0.0798299	-0.0738414	-0.131 to 0.001
AC(17:0) (b)		-0.109226	-0.175 to -0.044	0.00115049	0.00363317	-0.107365	-0.174 to -0.05
AC(18:0)		-0.125819	-0.187 to -0.064	7.29165e-05	0.000372258	-0.125084	-0.192 to -0.072
AC(18:1)		-0.032345	-0.084 to 0.02	0.22347	0.304767	-0.0318145	-0.085 to 0.013
AC(18:2)		-0.0716061	-0.12 to -0.023	0.00413178	0.0108687	-0.0707563	-0.122 to -0.029
DG(14:0_16:0)		-0.0942168	-0.181 to -0.008	0.0335158	0.0632804	-0.0953901	-0.173 to -0.005
DG(14:0_18:2)		-0.12495	-0.211 to -0.039	0.00453684	0.0117745	-0.12704	-0.204 to -0.042
DG(16:0_16:0)		-0.0518564	-0.138 to 0.034	0.236597	0.320417	-0.0519822	-0.141 to 0.028
DG(16:0_16:1)		-0.014255	-0.103 to 0.074	0.75191	0.812649	-0.0147896	-0.097 to 0.079
DG(16:0_18:1)		-0.0386216	-0.123 to 0.046	0.371944	0.464801	-0.038873	-0.126 to 0.055
DG(16:0_18:2)		-0.0363345	-0.121 to 0.049	0.40326	0.492028	-0.0349429	-0.124 to 0.042
DG(16:0_20:4)		-0.00114996	-0.085 to 0.083	0.978545	0.984149	-0.00147999	-0.087 to 0.085
DG(16:0_22:5)		-0.0328131	-0.119 to 0.054	0.457207	0.546281	-0.0316768	-0.121 to 0.05
DG(16:0_22:6)		-0.0510411	-0.134 to 0.032	0.229465	0.311848	-0.0535342	-0.128 to 0.034
DG(16:1_18:1)		-0.0253734	-0.113 to 0.063	0.572241	0.654955	-0.0272146	-0.109 to 0.061
DG(18:0_18:1)		-0.00991725	-0.096 to 0.076	0.82103	0.865651	-0.00772109	-0.093 to 0.071
DG(18:0_18:2)		-0.0125424	-0.098 to 0.073	0.77336	0.828769	-0.0115574	-0.092 to 0.066
DG(18:0_20:4)		0.0493084	-0.021 to 0.119	0.167748	0.24106	0.0503144	-0.018 to 0.117
DG(18:0_22:6)		0.0834162	-0.004 to 0.17	0.0608474	0.104233	0.0846313	0.005 to 0.165
DG(18:1_18:1)		-0.00227837	-0.09 to 0.085	0.959224	0.972564	-0.000982529	-0.082 to 0.085
DG(18:1_18:2)		0.00124841	-0.086 to 0.088	0.977619	0.984149	0.00150104	-0.085 to 0.085
DG(18:1_18:3)		-0.0379498	-0.125 to 0.049	0.392978	0.484049	-0.0370605	-0.117 to 0.045
DG(18:1_20:3)		-0.0275233	-0.113 to 0.058	0.527461	0.61441	-0.026838	-0.106 to 0.049
DG(18:1_20:4)		0.0708766	-0.012 to 0.154	0.0960756	0.148812	0.0714092	-0.01 to 0.153
DG(18:1_20:5)		-0.0112209	-0.095 to 0.073	0.793217	0.844357	-0.012207	-0.097 to 0.075
DG(18:1_22:5)		0.0111265	-0.073 to 0.095	0.796046	0.845051	0.00962483	-0.067 to 0.097
DG(18:1_22:6)		0.000644841	-0.083 to 0.084	0.987893	0.989168	0.00236136	-0.079 to 0.077
DG(18:2_18:2)		0.0025394	-0.085 to 0.09	0.954579	0.972117	0.00303767	-0.078 to 0.094
DG(18:2_20:4)		0.0397839	-0.044 to 0.124	0.353268	0.447934	0.0406899	-0.045 to 0.125
DG(18:2_22:6)		-0.0130107	-0.096 to 0.07	0.758606	0.816475	-0.00934675	-0.101 to 0.062
TG(48:0) [SIM]		-0.137244	-0.224 to -0.05	0.00203795	0.00594529	-0.139151	-0.217 to -0.051
TG(48:1) [SIM]		-0.16814	-0.254 to -0.082	0.000143579	0.000636672	-0.166832	-0.267 to -0.086
TG(48:2) [SIM]		-0.160592	-0.247 to -0.075	0.000279813	0.00111351	-0.160458	-0.245 to -0.071
TG(48:3) [SIM]		-0.151916	-0.238 to -0.065	0.000628256	0.00221603	-0.148122	-0.25 to -0.076
TG(49:1) [SIM]		-0.0937226	-0.181 to -0.006	0.0363625	0.0679936	-0.0951782	-0.18 to -0.013
TG(50:0) [SIM]		-0.10123	-0.188 to -0.014	0.0230333	0.0465465	-0.101628	-0.186 to -0.015
TG(50:1) [SIM]		-0.0746939	-0.162 to 0.012	0.0934872	0.145383	-0.0763612	-0.159 to 0.014
TG(50:2) [SIM]		-0.087641	-0.175 to -0.001	0.0491432	0.0872657	-0.0863914	-0.172 to -0.006
TG(50:3) [SIM]		-0.100874	-0.188 to -0.014	0.0236349	0.0472829	-0.104045	-0.177 to -0.011
TG(50:4) [SIM]		-0.125205	-0.212 to -0.038	0.00492339	0.0126091	-0.123778	-0.214 to -0.041
TG(51:0) [SIM]		0.0045796	-0.083 to 0.092	0.918641	0.944193	0.00605963	-0.074 to 0.085
TG(51:1) [SIM]		-0.0603936	-0.148 to 0.027	0.17657	0.251871	-0.058369	-0.149 to 0.021
TG(51:2) [SIM]		-0.0488579	-0.136 to 0.038	0.272412	0.36037	-0.0504244	-0.13 to 0.03
TG(52:1) [SIM]		-0.0883512	-0.175 to -0.002	0.0465002	0.0832411	-0.0897196	-0.167 to -0.004
TG(52:2) [SIM]		0.00203348	-0.085 to 0.089	0.963603	0.97491	0.00240045	-0.086 to 0.076
TG(52:3) [SIM]		0.0167939	-0.071 to 0.104	0.706873	0.770413	0.016115	-0.068 to 0.096
TG(52:4) [SIM]		-0.00233568	-0.09 to 0.086	0.958461	0.972564	-0.00197545	-0.084 to 0.078
TG(52:5) [SIM]		-0.0510316	-0.139 to 0.037	0.254789	0.340303	-0.047224	-0.143 to 0.034
TG(53:2) [SIM]		-0.0352427	-0.122 to 0.052	0.428573	0.518026	-0.0360665	-0.113 to 0.058
TG(54:0) [SIM]		-0.134003	-0.221 to -0.047	0.00272354	0.00757516	-0.134668	-0.228 to -0.053
TG(54:1) [SIM]		-0.0997561	-0.187 to -0.013	0.025301	0.0497052	-0.0985272	-0.191 to -0.022
TG(54:2) [SIM]		-0.0470148	-0.134 to 0.04	0.290352	0.377409	-0.0455466	-0.142 to 0.045
TG(54:3) [SIM]		-0.0303745	-0.118 to 0.058	0.499286	0.585266	-0.0293846	-0.131 to 0.053
TG(54:4) [SIM]		-0.0372117	-0.125 to 0.051	0.408092	0.496363	-0.0369654	-0.128 to 0.044
TG(54:5) [SIM]		-0.0176486	-0.106 to 0.07	0.694582	0.76237	-0.0155919	-0.1 to 0.065
TG(54:6) [SIM]		-0.040151	-0.128 to 0.048	0.37237	0.464801	-0.0390706	-0.126 to 0.042
TG(54:7) [SIM]		-0.0490056	-0.136 to 0.038	0.2726	0.36037	-0.0499874	-0.138 to 0.04
TG(56:6) [SIM]		0.0774951	-0.008 to 0.163	0.0754354	0.122979	0.0776747	-0.01 to 0.163
TG(56:7) [SIM]		0.0424885	-0.042 to 0.127	0.326244	0.417764	0.0413218	-0.044 to 0.115
TG(56:8) [SIM]		0.00997271	-0.076 to 0.096	0.820213	0.865651	0.00989233	-0.073 to 0.088
TG(56:9) [SIM]		-0.0312901	-0.119 to 0.056	0.482775	0.570947	-0.03135	-0.118 to 0.049
TG(58:10) [SIM]		-0.00458428	-0.09 to 0.081	0.916604	0.943348	-0.00500311	-0.086 to 0.078
TG(58:8) [SIM]		0.0575894	-0.028 to 0.143	0.186482	0.263109	0.0575772	-0.025 to 0.14
TG(58:9) [SIM]		0.0169593	-0.069 to 0.103	0.699146	0.766295	0.0181562	-0.072 to 0.104
TG(48:0) [NL-16:0]		-0.114469	-0.201 to -0.027	0.0101694	0.0230745	-0.114456	-0.2 to -0.025
TG(48:0) [NL-18:0]		-0.144733	-0.231 to -0.058	0.00112731	0.00359997	-0.14531	-0.225 to -0.058
TG(48:1) [NL-16:1]		-0.101866	-0.189 to -0.014	0.0229141	0.0465465	-0.103274	-0.185 to -0.013
TG(48:1) [NL-18:1]		-0.173773	-0.259 to -0.088	7.80078e-05	0.000388039	-0.174321	-0.255 to -0.086
TG(48:2) [NL-14:0]		-0.154775	-0.241 to -0.069	0.00046539	0.0017035	-0.154276	-0.234 to -0.072
TG(48:2) [NL-14:1]		-0.114296	-0.202 to -0.027	0.0106187	0.0238154	-0.113886	-0.198 to -0.031
TG(48:2) [NL-16:1]		-0.089328	-0.177 to -0.002	0.0451761	0.0811496	-0.0893663	-0.171 to 0
TG(48:2) [NL-18:2]		-0.157458	-0.243 to -0.072	0.000343505	0.0013131	-0.158133	-0.246 to -0.083
TG(48:3) [NL-14:0]		-0.148054	-0.235 to -0.062	0.000853156	0.00287848	-0.149587	-0.224 to -0.069
TG(48:3) [NL-16:1]		-0.167274	-0.254 to -0.081	0.000169827	0.000732145	-0.167214	-0.249 to -0.087
TG(48:3) [NL-18:3]		-0.14275	-0.229 to -0.056	0.00132295	0.00402592	-0.143201	-0.228 to -0.062
TG(49:1) [NL-16:1]		-0.0803645	-0.168 to 0.008	0.0743556	0.121474	-0.0782066	-0.166 to 0.001
TG(49:1) [NL-17:1]		-0.0884673	-0.176 to -0.001	0.0481446	0.0858855	-0.089976	-0.171 to -0.006
TG(50:0) [NL-18:0]		-0.105815	-0.193 to -0.019	0.0173647	0.0366168	-0.105398	-0.192 to -0.024
TG(50:1) [NL-14:0]		-0.152475	-0.239 to -0.066	0.000557341	0.00197487	-0.15539	-0.233 to -0.061
TG(50:1) [NL-16:0]		-0.0778228	-0.165 to 0.009	0.0804246	0.129212	-0.0754306	-0.171 to 0.007
TG(50:1) [NL-18:1]		-0.0916375	-0.179 to -0.004	0.0398027	0.0735402	-0.092336	-0.176 to -0.005
TG(50:2) [NL-14:0]		-0.123534	-0.209 to -0.038	0.00494382	0.0126197	-0.124635	-0.204 to -0.033
TG(50:2) [NL-16:1]		-0.00668903	-0.093 to 0.08	0.879511	0.918574	-0.00775747	-0.092 to 0.071
TG(50:2) [NL-18:1]		-0.0906027	-0.177 to -0.004	0.0413602	0.0756969	-0.0903369	-0.185 to -0.007
TG(50:2) [NL-18:2]		-0.101557	-0.189 to -0.014	0.0229807	0.0465465	-0.100799	-0.191 to -0.015
TG(50:3) [NL-14:0]		-0.137952	-0.224 to -0.052	0.0018251	0.00536468	-0.136588	-0.219 to -0.05
TG(50:3) [NL-14:1]		-0.115884	-0.203 to -0.029	0.00942011	0.0216599	-0.116596	-0.205 to -0.033
TG(50:3) [NL-16:1]		-0.0277296	-0.114 to 0.059	0.528899	0.61441	-0.024708	-0.105 to 0.055
TG(50:3) [NL-18:2]		-0.0802753	-0.167 to 0.006	0.0700478	0.116642	-0.0790479	-0.165 to 0.005
TG(50:3) [NL-18:3]		-0.0740453	-0.162 to 0.013	0.0979686	0.151441	-0.0774566	-0.155 to 0.024
TG(50:4) [NL-14:0]		-0.121792	-0.209 to -0.035	0.00611468	0.0151103	-0.119136	-0.203 to -0.033
TG(50:4) [NL-18:3]		-0.119178	-0.206 to -0.032	0.00768484	0.0181812	-0.117262	-0.206 to -0.032
TG(50:4) [NL-20:4]		-0.107255	-0.194 to -0.021	0.0157076	0.0333948	-0.105852	-0.191 to -0.015
TG(51:0) [NL-16:0]		-0.104057	-0.191 to -0.017	0.0198519	0.0414115	-0.105826	-0.186 to -0.021
TG(51:1) [NL-17:0]		-0.0859204	-0.173 to 0.001	0.0534176	0.0929419	-0.086723	-0.169 to -0.003
TG(51:2) [NL-15:0]		-0.0894811	-0.176 to -0.003	0.043971	0.0798299	-0.0908409	-0.168 to -0.003
TG(51:2) [NL-17:0]		-0.0824431	-0.169 to 0.004	0.0630451	0.107523	-0.0801307	-0.171 to 0.001
TG(51:2) [NL-17:1]		-0.0823093	-0.169 to 0.004	0.0634725	0.107778	-0.0807064	-0.166 to 0.006
TG(52:1) [NL-18:0]		-0.0868723	-0.174 to 0	0.0504053	0.0890991	-0.0867637	-0.17 to 0.001
TG(52:1) [NL-18:1]		-0.0835304	-0.17 to 0.003	0.0596723	0.102848	-0.0850164	-0.165 to 0.012
TG(52:2) [NL-16:0]		0.0526826	-0.034 to 0.14	0.235585	0.319604	0.054859	-0.031 to 0.138
TG(52:2) [NL-18:2]		-0.103853	-0.19 to -0.017	0.0188271	0.0393797	-0.106273	-0.187 to -0.014
TG(52:3) [NL-16:1]		-0.0376286	-0.124 to 0.049	0.394394	0.485024	-0.0388125	-0.116 to 0.053
TG(52:3) [NL-18:2]		0.0674809	-0.019 to 0.154	0.128914	0.190884	0.06839	-0.015 to 0.15
TG(52:4) [NL-16:1]		-0.0445801	-0.132 to 0.043	0.318421	0.408421	-0.044897	-0.123 to 0.04
TG(52:4) [NL-18:2]		0.0179621	-0.07 to 0.105	0.687508	0.757368	0.0215508	-0.071 to 0.094
TG(52:4) [NL-18:3]		-0.0379618	-0.126 to 0.05	0.399463	0.488932	-0.0362765	-0.136 to 0.044
TG(52:5) [NL-18:3]		-0.0504132	-0.138 to 0.037	0.260184	0.346317	-0.0503718	-0.138 to 0.032
TG(52:5) [NL-20:4]		-0.0319745	-0.119 to 0.055	0.471181	0.559933	-0.0325127	-0.116 to 0.046
TG(52:5) [NL-20:5]		-0.0451164	-0.133 to 0.043	0.314012	0.404102	-0.0494108	-0.127 to 0.044
TG(53:2) [NL-17:1]		-0.0680956	-0.155 to 0.019	0.127014	0.188818	-0.0688974	-0.162 to 0.019
TG(53:2) [NL-18:1]		-0.0322158	-0.119 to 0.055	0.467522	0.556437	-0.0314085	-0.135 to 0.04
TG(54:0) [NL-18:0]		-0.117637	-0.205 to -0.03	0.00841454	0.0195499	-0.116021	-0.195 to -0.031
TG(54:1) [NL-18:1]		-0.100994	-0.188 to -0.014	0.0236415	0.0472829	-0.0986615	-0.19 to -0.017
TG(54:2) [NL-18:0]		-0.0399627	-0.127 to 0.047	0.369919	0.464801	-0.0389946	-0.142 to 0.044
TG(54:2) [NL-20:1]		-0.052326	-0.139 to 0.034	0.237176	0.320642	-0.0549857	-0.141 to 0.041
TG(54:3) [NL-18:1]		-0.0466138	-0.135 to 0.041	0.300257	0.38898	-0.0425018	-0.143 to 0.043
TG(54:3) [NL-18:2]		-0.0152258	-0.103 to 0.072	0.733111	0.796771	-0.0164381	-0.109 to 0.067
TG(54:4) [NL-18:2]		-0.0221704	-0.109 to 0.065	0.61858	0.695679	-0.0198464	-0.109 to 0.067
TG(54:4) [NL-20:3]		0.0228377	-0.063 to 0.109	0.602836	0.679943	0.0229193	-0.066 to 0.1
TG(54:5) [NL-18:3]		-0.0465687	-0.135 to 0.041	0.299969	0.38898	-0.0444115	-0.133 to 0.04
TG(54:5) [NL-20:4]		0.164049	0.079 to 0.25	0.0001877	0.000791606	0.161419	0.086 to 0.252
TG(54:6) [NL-18:3]		-0.0716518	-0.16 to 0.016	0.111222	0.169898	-0.0696625	-0.167 to 0.013
TG(54:6) [NL-20:4]		0.121727	0.036 to 0.208	0.00572535	0.0143318	0.121769	0.033 to 0.204
TG(54:6) [NL-20:5]		0.0308469	-0.056 to 0.117	0.485662	0.571887	0.0291827	-0.051 to 0.13
TG(54:6) [NL-22:6]		-0.00547629	-0.091 to 0.08	0.900129	0.931334	-0.00530214	-0.092 to 0.084
TG(54:7) [NL-20:5]		-0.0551379	-0.143 to 0.032	0.21764	0.298827	-0.0539817	-0.139 to 0.029
TG(54:7) [NL-22:6]		-0.0452215	-0.131 to 0.04	0.300852	0.389103	-0.0458012	-0.127 to 0.04
TG(56:6) [NL-20:4]		0.167679	0.082 to 0.253	0.000132419	0.000608031	0.16638	0.073 to 0.246
TG(56:6) [NL-22:5](a)		0.0765111	-0.008 to 0.161	0.0775237	0.125592	0.0724308	-0.007 to 0.168
TG(56:6) [NL-22:5](b)		0.0768909	-0.008 to 0.162	0.0761195	0.123834	0.0757086	-0.015 to 0.159
TG(56:7) [NL-20:4]		0.0992898	0.013 to 0.186	0.0248948	0.0491561	0.0978519	0.007 to 0.186
TG(56:7) [NL-20:5]		0.0344453	-0.051 to 0.12	0.431953	0.521299	0.035281	-0.065 to 0.114
TG(56:7) [NL-22:5](a)		0.0969737	0.012 to 0.182	0.0265276	0.0513352	0.0977624	0.018 to 0.172
TG(56:7) [NL-22:5](b)		0.0970133	0.012 to 0.182	0.0264663	0.0513352	0.0963716	0.01 to 0.176
TG(56:7) [NL-22:6]		0.032033	-0.052 to 0.116	0.457581	0.546281	0.0309511	-0.054 to 0.112
TG(56:8) [NL-20:4]		0.0184709	-0.069 to 0.106	0.677943	0.753702	0.0186473	-0.072 to 0.104
TG(56:8) [NL-20:5]		-0.0491722	-0.137 to 0.038	0.271763	0.36037	-0.0482385	-0.135 to 0.026
TG(56:8) [NL-22:6]		0.0301981	-0.054 to 0.115	0.484655	0.571569	0.0310819	-0.055 to 0.113
TG(56:9) [NL-22:6]		-0.0607433	-0.146 to 0.025	0.16428	0.236514	-0.0607549	-0.14 to 0.022
TG(58:10) [NL-22:6]		-0.041157	-0.126 to 0.044	0.343336	0.436769	-0.0387215	-0.127 to 0.044
TG(58:8) [NL-22:6]		0.0391986	-0.047 to 0.125	0.371413	0.464801	0.0393214	-0.049 to 0.114
TG(58:9) [NL-22:6]		-0.00632055	-0.092 to 0.079	0.884686	0.920263	-0.00721922	-0.088 to 0.08
TG(O-50:1) [SIM]		-0.0597796	-0.147 to 0.027	0.180025	0.25586	-0.0575607	-0.15 to 0.022
TG(O-50:2) [SIM]		-0.0660598	-0.153 to 0.021	0.136828	0.201068	-0.0655246	-0.145 to 0.019
TG(O-50:3) [SIM]		-0.0807914	-0.169 to 0.007	0.0726072	0.119879	-0.082231	-0.167 to 0.008
TG(O-52:0) [SIM]		-0.050859	-0.138 to 0.036	0.253146	0.339278	-0.048405	-0.137 to 0.029
TG(O-52:1) [SIM]		-0.0824404	-0.169 to 0.004	0.0632501	0.107636	-0.0831606	-0.159 to 0.018
TG(O-52:2) [SIM]		-0.0765364	-0.163 to 0.01	0.0849225	0.134489	-0.0755731	-0.162 to 0.01
TG(O-54:2) [SIM]		-0.100222	-0.187 to -0.014	0.0234619	0.0471669	-0.0995167	-0.183 to -0.017
TG(O-54:3) [SIM]		-0.0055272	-0.093 to 0.082	0.901342	0.931347	-0.00499223	-0.083 to 0.081
TG(O-54:4) [SIM]		-0.081515	-0.169 to 0.006	0.0681614	0.113749	-0.0812701	-0.174 to 0.009
TG(O-50:1) [NL-15:0]		-0.0792489	-0.166 to 0.007	0.0738573	0.120914	-0.0802118	-0.164 to 0.008
TG(O-50:1) [NL-16:0]		-0.0854918	-0.173 to 0.002	0.0568637	0.0987163	-0.0848689	-0.176 to 0.009
TG(O-50:1) [NL-17:1]		-0.0781282	-0.166 to 0.01	0.0825364	0.132331	-0.0751878	-0.169 to 0.014
TG(O-50:1) [NL-18:1]		-0.0703643	-0.157 to 0.017	0.113643	0.17228	-0.0704766	-0.147 to 0.006
TG(O-50:2) [NL-16:1]		-0.0195765	-0.105 to 0.066	0.654377	0.730643	-0.0209411	-0.101 to 0.063
TG(O-50:2) [NL-18:1]		-0.100121	-0.187 to -0.013	0.0239796	0.0477133	-0.101886	-0.176 to -0.018
TG(O-50:2) [NL-18:2]		-0.0354555	-0.122 to 0.052	0.424987	0.514493	-0.0358307	-0.112 to 0.053
TG(O-50:3) [NL-18:2]		-0.136458	-0.223 to -0.05	0.0021545	0.00621522	-0.136795	-0.225 to -0.058
TG(O-52:0) [NL-16:0]		-0.116112	-0.203 to -0.029	0.00947338	0.0216707	-0.113079	-0.215 to -0.021
TG(O-52:1) [NL-16:0]		-0.108571	-0.196 to -0.021	0.0151145	0.0324404	-0.108902	-0.191 to -0.015
TG(O-52:1) [NL-18:1]		-0.0960845	-0.183 to -0.009	0.0302405	0.0576575	-0.0936474	-0.183 to -0.009
TG(O-52:2) [NL-16:0]		-0.117128	-0.203 to -0.031	0.00805023	0.0189302	-0.11677	-0.196 to -0.035
TG(O-52:2) [NL-17:1]		-0.0866078	-0.173 to 0	0.051187	0.0902752	-0.0881004	-0.172 to -0.008
TG(O-52:2) [NL-18:1]		-0.0860005	-0.172 to 0	0.0516837	0.0908039	-0.0854481	-0.165 to 0
TG(O-54:2) [NL-17:1]		-0.0887159	-0.175 to -0.003	0.044195	0.0798299	-0.088991	-0.176 to -0.013
TG(O-54:2) [NL-18:1]		-0.101709	-0.188 to -0.015	0.0214466	0.0439119	-0.100894	-0.192 to -0.022
TG(O-54:3) [NL-17:1]		-0.102716	-0.19 to -0.016	0.0208115	0.0429513	-0.104668	-0.182 to -0.021
TG(O-54:3) [NL-18:1]		-0.0890041	-0.175 to -0.003	0.0432931	0.0788625	-0.0898822	-0.174 to -0.004
TG(O-54:4) [NL-17:1]		-0.0976974	-0.185 to -0.01	0.0290388	0.0556398	-0.0963715	-0.193 to -0.025
TG(O-54:4) [NL-18:2]		-0.0215811	-0.108 to 0.065	0.625879	0.702869	-0.024086	-0.098 to 0.064
Ubiquinone		0.0509378	-0.036 to 0.138	0.25202	0.338352	0.0488603	-0.029 to 0.151
CE(18:2) [+OH]		-0.0801923	-0.168 to 0.007	0.0724739	0.119879	-0.0803407	-0.166 to 0.003
CE(20:4) [+OH]		-0.0679974	-0.155 to 0.019	0.12498	0.18615	-0.0675393	-0.153 to 0.014
CE(22:6) [+OH]		-0.189987	-0.274 to -0.106	1.19344e-05	8.05314e-05	-0.187116	-0.271 to -0.107
LPC(18:2) [+OH]		-0.0770183	-0.132 to -0.022	0.00597089	0.0148032	-0.0763131	-0.132 to -0.029
LPC(20:4) [+OH]		-0.00827403	-0.055 to 0.038	0.726665	0.790872	-0.00683595	-0.058 to 0.032
LPC(22:6) [+OH]		-0.0591463	-0.103 to -0.016	0.00815149	0.0191105	-0.0594855	-0.104 to -0.02
PC(34:2) [+OH]		-0.106939	-0.192 to -0.022	0.0144075	0.0312298	-0.105373	-0.19 to -0.025
PC(36:4) [+OH]		0.0580443	-0.028 to 0.144	0.187599	0.263727	0.0573748	-0.021 to 0.154
PC(38:6) [+OH]		-0.172415	-0.257 to -0.088	7.59384e-05	0.000382147	-0.171803	-0.252 to -0.095
Regression coefficients (β) are estimated difference in log lipidomic measure at 12 months of age (SD units) per 1 SD increase in log hsCRP at 12 months.
Models are adjusted for infant sex, birth weight z-score, gestational age, exact age at 12-month time point, maternal household income, exposure to any breastfeeding, exposure to any maternal smoking during pregnancy, and 12-month blood sample processing time.
Adjusted p-values are based on the Benjamini-Hochberg method of adjustment for multiple comparisons.
Bootstrap estimates are calculated as the mean coefficent across 1000 iterations of bootstrap resampling.
Bootstrap 95% confidence intervals are bias-corrected accelerated percentile confidence intervals.
