# Supplementary material for: Early life infection and proinflammatory, atherogenic metabolomic and lipidomic profiles in infancy: a population-based cohort study
Source: eLife. 2022 May 10;11:e75170. doi: 10.7554/eLife.75170 (PMC9090335; doi:10.7554/eLife.75170)
Supplement: Figure 6—source data 2. [file elife-75170-fig6-data2.xlsx]

## Sheet: Figure 6 - Source Data 2
Figure 6 - Source Data 2. Summary of regression models for difference in 6-month LC/MS lipidomic measures per SD increase in 6-month log hsCRP.
		6-month hsCRP
Measure	Class Name	Estimate (β)	95% Confidence Interval	P-value	Adj. P-value	Bootstrap Estimate	Bootstrap 95% Confidence Interval
Total Sph	Sphingosines	0.0346382	-0.019 to 0.088	0.205655	0.308483	0.0351718	-0.018 to 0.082
Total S1P	Sphingosine phosphates	-0.0512866	-0.109 to 0.006	0.0803985	0.165029	-0.0523117	-0.108 to 0.013
Total dhCer	Dihydro-ceramides	-0.058266	-0.142 to 0.026	0.174237	0.283136	-0.0549051	-0.145 to 0.024
Total Cer	Ceramides	-0.0444556	-0.128 to 0.039	0.297083	0.413794	-0.0450442	-0.131 to 0.049
Total C1P	Ceramide-1-phosphate	-0.134487	-0.219 to -0.05	0.00189406	0.00671531	-0.135559	-0.222 to -0.044
Total MHC	Hexosyl-ceramides	-0.00606643	-0.088 to 0.076	0.885137	0.885137	-0.00793076	-0.087 to 0.07
Total DHC	Di-hexosyl-ceramides	0.0768926	-0.008 to 0.161	0.0750423	0.162592	0.076319	-0.005 to 0.163
Total THC	Tri-hexosyl-ceramides	-0.123471	-0.208 to -0.039	0.00444533	0.0123834	-0.125823	-0.204 to -0.034
Total GM3	GM3-gangliosides	-0.0315303	-0.114 to 0.051	0.453114	0.552232	-0.0311524	-0.117 to 0.055
Total GM1	GM1-gangliosides	-0.0291444	-0.114 to 0.056	0.500908	0.574571	-0.0300364	-0.12 to 0.057
Total Sulfatide	Sulfatides	-0.190425	-0.274 to -0.107	1.04257e-05	8.13204e-05	-0.190803	-0.274 to -0.107
Total SM	Sphingomyelins	-0.034151	-0.119 to 0.05	0.429167	0.53992	-0.0334141	-0.127 to 0.059
Total PA	Phosphatidic acid	-0.0800442	-0.133 to -0.027	0.0032103	0.0096309	-0.0789415	-0.132 to -0.029
Total PC	Phosphatidylcholines	-0.133353	-0.217 to -0.05	0.00176617	0.00671531	-0.132835	-0.237 to -0.037
Total PC_O	Alkyl phosphatidylcholines	-0.067055	-0.151 to 0.017	0.118662	0.210356	-0.06876	-0.155 to 0.03
Total PC_P	Alkenyl phosphatidylcholines	-0.176155	-0.259 to -0.094	3.30317e-05	0.000184034	-0.175356	-0.258 to -0.097
Total LPC	Lysophosphatidylcholines	-0.168869	-0.232 to -0.106	1.9026e-07	1.85503e-06	-0.167339	-0.237 to -0.096
Total LPC_O	Lysoalkyl phosphatidylcholines	-0.0583419	-0.113 to -0.004	0.0357852	0.0820955	-0.0581542	-0.118 to -0.002
Total LPC_P	Lysoalkenyl phosphatidylcholines	-0.167133	-0.227 to -0.107	6.92565e-08	9.00334e-07	-0.167268	-0.23 to -0.098
Total PE	Phosphatidylethanolamines	-0.0557085	-0.139 to 0.028	0.190532	0.297231	-0.0553934	-0.146 to 0.028
Total PE_O	Alkylphosphatidylethanolamines	-0.171342	-0.253 to -0.09	4.52239e-05	0.000220466	-0.172934	-0.264 to -0.082
Total PE_P	Alkenylphosphatidylethanolamines	-0.1225	-0.203 to -0.042	0.00311161	0.0096309	-0.123543	-0.204 to -0.03
Total LPE	Lysophosphatidylethanolamines	-0.243488	-0.325 to -0.162	6.80185e-09	1.32636e-07	-0.244846	-0.325 to -0.152
Total LPE_P	Lysoalkenylphosphatidylethanolamines	-0.0502921	-0.11 to 0.009	0.0995202	0.194064	-0.0498763	-0.109 to 0.013
Total PI	Phosphatidylinositols	-0.267334	-0.349 to -0.185	3.667e-10	1.43013e-08	-0.267535	-0.355 to -0.179
Total PIP1	Phosphatidylinositol phosphate	-0.0345092	-0.111 to 0.042	0.376437	0.506243	-0.0321389	-0.11 to 0.04
Total LPI	Lysophosphatidylinositols	0.013539	-0.069 to 0.096	0.746609	0.786966	0.0141799	-0.071 to 0.107
Total PS	Phosphatidylserines	0.0445447	-0.013 to 0.102	0.131383	0.22278	0.0464244	-0.012 to 0.106
Total PG	Phosphatidylglycerols	-0.0933756	-0.175 to -0.011	0.0261465	0.0637321	-0.0928054	-0.18 to -0.013
Total CE	Cholesteryl esters	-0.188271	-0.273 to -0.104	1.45695e-05	9.47017e-05	-0.188119	-0.301 to -0.099
Total COH	Free cholesterol	-0.0528548	-0.138 to 0.032	0.221712	0.32025	-0.0524832	-0.148 to 0.04
Total DE	Dehydro-cholesteryl esters	-0.146762	-0.229 to -0.065	0.000491135	0.00212825	-0.14658	-0.228 to -0.065
Total FFA	Free fatty acids	-0.0582315	-0.13 to 0.013	0.11141	0.206904	-0.056149	-0.136 to 0.01
Total Acylcarnitine	Acylcarnitines	-0.023465	-0.088 to 0.041	0.475105	0.561488	-0.0233713	-0.09 to 0.043
Total DG	Diacylglycerols	0.0214633	-0.063 to 0.106	0.619932	0.671593	0.0226574	-0.063 to 0.107
Total TG	Triacylglycerols	0.0355736	-0.047 to 0.118	0.397145	0.516288	0.0361934	-0.054 to 0.113
Total TG_O	Alkyldiacylglycerols	0.00711128	-0.074 to 0.088	0.863251	0.885137	0.00922999	-0.084 to 0.091
Total Ubiquinone	Ubiquinone	0.0220194	-0.063 to 0.107	0.611829	0.671593	0.0232511	-0.079 to 0.114
Total OxSpecies	Oxidised species	-0.117598	-0.202 to -0.033	0.00649363	0.0168834	-0.118924	-0.198 to -0.031
Sph(d16:1)		0.0465371	-0.036 to 0.129	0.267863	0.417393	0.0457357	-0.043 to 0.138
Sph(d18:1)		0.0388071	-0.012 to 0.09	0.136907	0.265599	0.0404625	-0.012 to 0.085
Sph(d18:2)		-0.049333	-0.135 to 0.037	0.26045	0.412871	-0.0488197	-0.14 to 0.035
S1P(d16:1)		-0.0629249	-0.126 to 0	0.0505116	0.126442	-0.062197	-0.126 to 0.002
S1P(d18:0)		-0.00531653	-0.067 to 0.056	0.865591	0.917621	-0.00530557	-0.069 to 0.057
S1P(d18:1)		-0.048611	-0.11 to 0.013	0.123304	0.245975	-0.0482858	-0.106 to 0.014
S1P(d18:2)		-0.0569453	-0.114 to 0	0.0495904	0.125029	-0.0570588	-0.111 to 0
Cer(d18:0/16:0)		0.0376455	-0.047 to 0.122	0.383588	0.546539	0.0383235	-0.047 to 0.124
Cer(d18:0/18:0)		0.0832917	0.001 to 0.165	0.0471107	0.120618	0.0851327	-0.001 to 0.171
Cer(d18:0/20:0)		-0.00636273	-0.091 to 0.078	0.882474	0.929172	-0.00553278	-0.09 to 0.077
Cer(d18:0/22:0)		-0.0511176	-0.136 to 0.033	0.23616	0.386331	-0.0513397	-0.133 to 0.023
Cer(d18:0/24:0)		-0.150435	-0.234 to -0.067	0.00047266	0.00364244	-0.149139	-0.233 to -0.066
Cer(d18:0/24:1)		0.00662026	-0.077 to 0.09	0.876456	0.924198	0.00716579	-0.078 to 0.091
Cer(d16:1/16:0)		0.0689264	-0.014 to 0.152	0.102956	0.214193	0.0662117	-0.015 to 0.165
Cer(d16:1/18:0)		0.11262	0.028 to 0.197	0.00911588	0.0333676	0.109293	0.029 to 0.221
Cer(d16:1/20:0)		0.0161907	-0.067 to 0.1	0.703901	0.809225	0.0184058	-0.072 to 0.105
Cer(d16:1/22:0)		-0.0324595	-0.114 to 0.049	0.437659	0.598359	-0.0327591	-0.123 to 0.052
Cer(d16:1/23:0)		-0.0503346	-0.132 to 0.031	0.225623	0.377143	-0.0482977	-0.139 to 0.027
Cer(d16:1/24:0)		-0.0973612	-0.179 to -0.016	0.0190611	0.0596428	-0.0981752	-0.184 to -0.009
Cer(d16:1/24:1)		0.0214986	-0.062 to 0.105	0.61351	0.734697	0.0214065	-0.061 to 0.12
Cer(d17:1/16:0)		0.123515	0.039 to 0.208	0.00419056	0.0189063	0.121922	0.036 to 0.215
Cer(d17:1/18:0)		0.0829781	-0.002 to 0.168	0.0563233	0.135736	0.0834601	-0.004 to 0.17
Cer(d17:1/20:0)		0.024581	-0.059 to 0.108	0.56521	0.707424	0.0252049	-0.062 to 0.116
Cer(d17:1/22:0)		-0.0246087	-0.109 to 0.06	0.568024	0.709801	-0.0229913	-0.125 to 0.073
Cer(d17:1/23:0)		-0.0728227	-0.156 to 0.011	0.0877821	0.190276	-0.0719101	-0.157 to 0.011
Cer(d17:1/24:0)		-0.122433	-0.206 to -0.039	0.00418744	0.0189063	-0.119387	-0.222 to -0.042
Cer(d17:1/24:1)		-0.00195889	-0.086 to 0.083	0.963766	0.976347	-0.00444028	-0.084 to 0.09
Cer(d18:1/14:0)		0.0646807	-0.016 to 0.145	0.117252	0.237566	0.0682132	-0.016 to 0.15
Cer(d18:1/16:0)		0.0857516	0.003 to 0.169	0.0438644	0.113727	0.08466	-0.007 to 0.177
Cer(d18:1/17:0)		0.0454224	-0.037 to 0.128	0.280942	0.435152	0.0449938	-0.035 to 0.136
Cer(d18:1/18:0)		0.146342	0.065 to 0.228	0.000454664	0.00363731	0.145307	0.059 to 0.229
Cer(d18:1/19:0)		0.0743516	-0.009 to 0.158	0.0821149	0.180003	0.0739753	-0.024 to 0.162
Cer(d18:1/20:0)		0.0820075	0 to 0.164	0.0515003	0.128029	0.082886	-0.013 to 0.162
Cer(d18:1/21:0)		0.0601087	-0.023 to 0.143	0.157794	0.290748	0.0600972	-0.021 to 0.141
Cer(d18:1/22:0)		0.0152362	-0.068 to 0.099	0.720884	0.815461	0.015173	-0.071 to 0.105
Cer(d18:1/23:0)		-0.0156483	-0.1 to 0.068	0.714922	0.814873	-0.0170498	-0.106 to 0.071
Cer(d18:1/24:0)		-0.0728278	-0.157 to 0.011	0.0890343	0.191655	-0.0721022	-0.164 to 0.012
Cer(d18:1/24:1)		0.0678133	-0.015 to 0.151	0.108615	0.222976	0.068372	-0.017 to 0.155
Cer(d18:1/26:0)		0.0554859	-0.03 to 0.141	0.205978	0.355606	0.0536495	-0.032 to 0.144
Cer(d18:2/14:0)		-0.00515188	-0.09 to 0.08	0.905669	0.937408	-0.00132305	-0.092 to 0.083
Cer(d18:2/16:0)		0.0710514	-0.012 to 0.154	0.0936695	0.198435	0.0712733	-0.02 to 0.163
Cer(d18:2/17:0)		0.0214662	-0.062 to 0.105	0.61642	0.737044	0.0235662	-0.066 to 0.099
Cer(d18:2/18:0)		0.0980142	0.015 to 0.181	0.0205325	0.0617566	0.0957945	0.01 to 0.179
Cer(d18:2/20:0)		0.0105901	-0.074 to 0.095	0.805326	0.87038	0.0105041	-0.076 to 0.102
Cer(d18:2/21:0)		0.0625916	-0.022 to 0.147	0.147515	0.27778	0.0612097	-0.029 to 0.144
Cer(d18:2/22:0)		-0.0701819	-0.153 to 0.013	0.0991639	0.207416	-0.0710629	-0.158 to 0.022
Cer(d18:2/23:0)		-0.0891352	-0.171 to -0.007	0.0341508	0.0920175	-0.0897053	-0.175 to -0.003
Cer(d18:2/24:0)		-0.127638	-0.211 to -0.045	0.00271703	0.013963	-0.127337	-0.225 to -0.04
Cer(d18:2/24:1)		0.0054071	-0.078 to 0.089	0.898649	0.935351	0.00352521	-0.086 to 0.097
Cer(d18:2/26:0)		-0.00107254	-0.085 to 0.083	0.980041	0.986396	-0.00335547	-0.082 to 0.079
Cer(d19:1/16:0)		-0.0417901	-0.126 to 0.042	0.330745	0.484261	-0.0403284	-0.131 to 0.048
Cer(d19:1/18:0)		0.049182	-0.032 to 0.131	0.237915	0.387862	0.0483721	-0.032 to 0.127
Cer(d19:1/20:0)		-8.06941e-05	-0.084 to 0.084	0.998492	0.999781	0.00137887	-0.082 to 0.09
Cer(d19:1/22:0)		-0.0377621	-0.12 to 0.044	0.367447	0.530332	-0.0383268	-0.128 to 0.045
Cer(d19:1/23:0)		-0.0508899	-0.134 to 0.032	0.228525	0.380548	-0.0496635	-0.134 to 0.03
Cer(d19:1/24:0)		-0.0762551	-0.158 to 0.006	0.0695644	0.160791	-0.0783005	-0.157 to 0.019
Cer(d19:1/24:1)		-0.0101424	-0.092 to 0.072	0.808215	0.872288	-0.0102342	-0.101 to 0.077
Cer(d19:1/26:0)		-0.0171448	-0.102 to 0.068	0.692106	0.796846	-0.0205635	-0.102 to 0.076
Cer(d20:1/22:0)		-0.025548	-0.108 to 0.057	0.543271	0.691112	-0.025576	-0.11 to 0.049
Cer(d20:1/23:0)		-0.0453723	-0.129 to 0.039	0.289834	0.441003	-0.0471576	-0.141 to 0.047
Cer(d20:1/24:0)		-0.0634905	-0.147 to 0.02	0.136709	0.265599	-0.0649171	-0.149 to 0.019
Cer(d20:1/24:1)		0.026828	-0.055 to 0.109	0.520093	0.670419	0.0253482	-0.043 to 0.118
Cer(d20:1/26:0)		0.0525224	-0.032 to 0.137	0.223867	0.376018	0.0553818	-0.033 to 0.135
Cer(m18:0/20:0)		-0.0702252	-0.152 to 0.011	0.0909973	0.194529	-0.0707371	-0.161 to 0.011
Cer(m18:0/22:0)		-0.0984873	-0.181 to -0.016	0.0200511	0.0613202	-0.0967492	-0.183 to -0.011
Cer(m18:0/23:0)		-0.084707	-0.169 to -0.001	0.0485565	0.123419	-0.0818504	-0.179 to 0.01
Cer(m18:0/24:0)		-0.120118	-0.203 to -0.037	0.00490481	0.0211155	-0.12003	-0.211 to -0.029
Cer(m18:0/24:1)		7.05733e-06	-0.084 to 0.084	0.999868	0.999868	-0.00014333	-0.084 to 0.086
Cer(m18:1/18:0)		-0.0418745	-0.122 to 0.038	0.305426	0.459323	-0.0415735	-0.123 to 0.041
Cer(m18:1/20:0)		-0.0801803	-0.162 to 0.001	0.053869	0.131869	-0.0818057	-0.166 to -0.003
Cer(m18:1/22:0)		-0.154243	-0.236 to -0.072	0.000259401	0.00235274	-0.153934	-0.252 to -0.069
Cer(m18:1/23:0)		-0.11664	-0.2 to -0.033	0.00629304	0.0250431	-0.115022	-0.21 to -0.027
Cer(m18:1/24:0)		-0.190821	-0.273 to -0.109	6.04731e-06	0.000117318	-0.190789	-0.276 to -0.1
Cer(m18:1/24:1)		-0.0225036	-0.105 to 0.06	0.592091	0.724264	-0.0202599	-0.105 to 0.068
Cer1P(d18:1/16:0)		-0.134487	-0.219 to -0.05	0.00189406	0.0104985	-0.136958	-0.217 to -0.033
HexCer(d16:1/18:0)		-0.181887	-0.266 to -0.098	2.68216e-05	0.000424767	-0.181268	-0.271 to -0.1
HexCer(d16:1/20:0)		-0.181309	-0.266 to -0.097	2.97637e-05	0.000452875	-0.181549	-0.269 to -0.089
HexCer(d16:1/22:0)		-0.14707	-0.229 to -0.065	0.00047408	0.00364244	-0.149293	-0.221 to -0.055
HexCer(d16:1/24:0)		-0.141389	-0.224 to -0.058	0.000902039	0.00578241	-0.142996	-0.223 to -0.051
HexCer(d18:1/16:0)		0.14349	0.061 to 0.226	0.000705708	0.00484628	0.142594	0.061 to 0.23
HexCer(d18:1/18:0)		-0.0904227	-0.173 to -0.008	0.0316784	0.0874819	-0.0913157	-0.183 to -0.013
HexCer(d18:1/20:0)		-0.0863393	-0.168 to -0.005	0.0385057	0.101981	-0.08897	-0.164 to 0
HexCer(d18:1/22:0)		-0.0618022	-0.144 to 0.02	0.140641	0.271487	-0.064281	-0.132 to 0.02
HexCer(d18:1/24:0)		-0.081744	-0.164 to 0	0.0519122	0.128293	-0.081214	-0.159 to 0.001
HexCer(d18:1/24:1)		0.0469178	-0.035 to 0.129	0.263173	0.415086	0.0444488	-0.031 to 0.144
HexCer(d18:2/18:0)		-0.128638	-0.211 to -0.046	0.00231882	0.0121192	-0.128835	-0.208 to -0.042
HexCer(d18:2/20:0)		-0.123899	-0.207 to -0.041	0.00350558	0.0166891	-0.123869	-0.21 to -0.032
HexCer(d18:2/22:0)		-0.110973	-0.193 to -0.029	0.00846652	0.031713	-0.112299	-0.187 to -0.036
HexCer(d18:2/24:0)		-0.108683	-0.191 to -0.026	0.0102109	0.0361811	-0.111203	-0.184 to -0.025
Hex2Cer(d16:1/16:0)		0.118257	0.035 to 0.201	0.00530718	0.0225048	0.119929	0.03 to 0.195
Hex2Cer(d16:1/24:1)		-0.0336718	-0.116 to 0.049	0.42576	0.58801	-0.0336772	-0.117 to 0.042
Hex2Cer(d18:1/16:0)		0.0974599	0.013 to 0.182	0.0247655	0.0719777	0.0975813	0.017 to 0.188
Hex2Cer(d18:1/18:0)		-0.0568706	-0.143 to 0.029	0.194017	0.339858	-0.0564849	-0.152 to 0.036
Hex2Cer(d18:1/20:0)		0.0259742	-0.057 to 0.109	0.538991	0.689056	0.0255289	-0.063 to 0.11
Hex2Cer(d18:1/22:0)		0.0303124	-0.05 to 0.111	0.460136	0.61563	0.03164	-0.057 to 0.108
Hex2Cer(d18:1/24:0)		-0.00613942	-0.089 to 0.077	0.884604	0.930153	-0.00619006	-0.086 to 0.08
Hex2Cer(d18:1/24:1)		0.059919	-0.024 to 0.144	0.162186	0.294149	0.0601908	-0.02 to 0.14
Hex2Cer(d18:2/16:0)		0.144352	0.061 to 0.228	0.000749265	0.00501232	0.144248	0.048 to 0.23
Hex2Cer(d18:2/24:1)		-0.0465148	-0.131 to 0.038	0.283209	0.437171	-0.0448058	-0.136 to 0.03
Hex3Cer(d18:1/16:0)		-0.119714	-0.205 to -0.035	0.00605181	0.0243327	-0.12075	-0.208 to -0.025
Hex3Cer(d18:1/18:0)		-0.15889	-0.243 to -0.075	0.000230559	0.00223642	-0.159159	-0.245 to -0.07
Hex3Cer(d18:1/20:0)		-0.0720781	-0.156 to 0.012	0.0936035	0.198435	-0.0685635	-0.158 to 0.033
Hex3Cer(d18:1/22:0)		-0.106655	-0.19 to -0.023	0.012382	0.0424229	-0.104605	-0.192 to -0.024
Hex3Cer(d18:1/24:0)		-0.103979	-0.188 to -0.02	0.015799	0.0508713	-0.107973	-0.179 to -0.013
Hex3Cer(d18:1/24:1)		-0.0527858	-0.138 to 0.032	0.224378	0.376063	-0.0510541	-0.143 to 0.037
GM3(d18:1/16:0)		0.0257739	-0.059 to 0.11	0.549909	0.692742	0.0236551	-0.058 to 0.112
GM3(d18:1/18:0)		-0.107459	-0.191 to -0.024	0.0115677	0.0400738	-0.108209	-0.197 to -0.018
GM3(d18:1/20:0)		0.041736	-0.041 to 0.124	0.321114	0.472835	0.0410654	-0.039 to 0.134
GM3(d18:1/22:0)		-0.0660182	-0.148 to 0.016	0.115601	0.23545	-0.0659254	-0.156 to 0.016
GM3(d18:1/24:0)		-0.0920521	-0.177 to -0.007	0.0333456	0.0904762	-0.0932157	-0.177 to -0.003
GM3(d18:1/24:1)		-0.0540687	-0.136 to 0.028	0.198006	0.345287	-0.0527775	-0.141 to 0.033
GM1(d18:1/16:0)		-0.0291444	-0.114 to 0.056	0.500908	0.658267	-0.0289253	-0.126 to 0.059
Sulfatide (d18:1:/16:0(OH))		-0.142989	-0.229 to -0.057	0.00111539	0.00695327	-0.142763	-0.221 to -0.044
Sulfatide (d18:1:/16:0)		-0.157866	-0.242 to -0.074	0.00026318	0.00235274	-0.156851	-0.242 to -0.075
Sulfatide (d18:1:/24:0(OH))		-0.124526	-0.209 to -0.04	0.00393982	0.0180905	-0.127028	-0.201 to -0.038
Sulfatide (d18:1:/24:0)		-0.260764	-0.344 to -0.178	1.30061e-09	3.36424e-07	-0.260929	-0.342 to -0.176
Sulfatide (d18:1:/24:1(OH))		-0.0592565	-0.144 to 0.026	0.172195	0.309698	-0.0605873	-0.15 to 0.032
Sulfatide (d18:1:/24:1)		-0.189491	-0.274 to -0.105	1.2268e-05	0.000216363	-0.188442	-0.273 to -0.089
SM(34:3)		-0.0853043	-0.169 to -0.001	0.0472524	0.120618	-0.0861485	-0.171 to 0.011
SM(35:2) (b)		-0.0776542	-0.162 to 0.006	0.0701284	0.161005	-0.0803013	-0.17 to 0.018
SM(37:1)		-0.0595216	-0.145 to 0.026	0.173476	0.309897	-0.0618861	-0.152 to 0.042
SM(37:2)		-0.0426811	-0.126 to 0.04	0.314588	0.467663	-0.0454094	-0.128 to 0.044
SM(38:3) (a)		0.0347954	-0.049 to 0.119	0.416141	0.579758	0.0352999	-0.052 to 0.125
SM(38:3) (b)		-0.0340115	-0.117 to 0.049	0.422145	0.584972	-0.0335901	-0.115 to 0.059
SM(40:3) (a)		-0.0112779	-0.097 to 0.074	0.795579	0.865876	-0.00951	-0.111 to 0.078
SM(40:3) (b)		-0.0282081	-0.11 to 0.054	0.5006	0.658267	-0.0285095	-0.108 to 0.058
SM(41:0)		-0.0438945	-0.127 to 0.039	0.300678	0.45306	-0.0467386	-0.122 to 0.04
SM(41:1) (a)		-0.0196905	-0.103 to 0.064	0.644139	0.763132	-0.0210511	-0.107 to 0.067
SM(43:1)		-0.0285476	-0.112 to 0.055	0.501769	0.658267	-0.0312834	-0.112 to 0.063
SM(43:2) (b)		0.0468076	-0.036 to 0.129	0.266922	0.417393	0.0454232	-0.037 to 0.146
SM(43:2) (c)		0.0511071	-0.035 to 0.137	0.242765	0.39247	0.050976	-0.046 to 0.132
SM(44:1)		-0.0509847	-0.135 to 0.033	0.236479	0.386331	-0.0517166	-0.136 to 0.035
SM(44:2)		0.0197173	-0.064 to 0.103	0.64292	0.763132	0.0204443	-0.065 to 0.104
SM(44:3)		0.0185817	-0.067 to 0.104	0.669889	0.780531	0.0157424	-0.075 to 0.111
SM(d16:1/19:0)		-0.052869	-0.135 to 0.03	0.209236	0.358426	-0.0525788	-0.137 to 0.032
SM(d16:1/23:0)/SM(d17:1/22:0)		-0.0537479	-0.137 to 0.03	0.206994	0.356159	-0.0560796	-0.141 to 0.032
SM(d16:1/24:1)		-0.0109287	-0.096 to 0.074	0.802101	0.868103	-0.0127303	-0.104 to 0.082
SM(d17:1/14:0)		-0.112793	-0.197 to -0.028	0.00926942	0.0336125	-0.111002	-0.205 to -0.024
SM(d17:1/16:0)		-0.0665114	-0.152 to 0.018	0.125674	0.248449	-0.0670004	-0.145 to 0.028
SM(d17:1/24:1)		0.0368964	-0.047 to 0.121	0.389016	0.552888	0.0362822	-0.048 to 0.124
SM(d18:0/14:0)		-0.0753841	-0.161 to 0.01	0.0836881	0.182924	-0.0752643	-0.168 to 0.012
SM(d18:0/16:0)		-0.0250391	-0.108 to 0.058	0.553179	0.695732	-0.0221731	-0.112 to 0.046
SM(d18:0/22:0)		-0.0569861	-0.14 to 0.026	0.177189	0.315364	-0.0575852	-0.138 to 0.024
SM(d18:1/14:0/SM(d16:1/16:0)		-0.0667986	-0.151 to 0.018	0.121033	0.242691	-0.0667339	-0.155 to 0.018
SM(d18:1/16:0)		-0.037673	-0.122 to 0.046	0.379957	0.543998	-0.0374059	-0.125 to 0.061
SM(d18:1/17:0)/SM(d17:1/18:0)		0.00426998	-0.078 to 0.087	0.919124	0.945447	0.0038714	-0.069 to 0.084
SM(d18:1/18:0/SM(d16:1/20:0)		-0.0619628	-0.145 to 0.021	0.143455	0.274867	-0.0612518	-0.148 to 0.029
SM(d18:1/20:0)/SM(d16:1/22:0)		-0.0966844	-0.18 to -0.013	0.0239269	0.0701558	-0.0990711	-0.187 to -0.005
SM(d18:1/22:0)/SM(d16:1/24:0)		-0.0299121	-0.115 to 0.055	0.489348	0.64801	-0.0290335	-0.126 to 0.062
SM(d18:1/23:0)/SM(d17:1/24:0)		-0.0111712	-0.097 to 0.074	0.798271	0.867588	-0.0126883	-0.1 to 0.076
SM(d18:1/24:0)		-0.0444687	-0.131 to 0.042	0.312561	0.466437	-0.0452155	-0.14 to 0.038
SM(d18:1/24:1)		0.0774134	-0.006 to 0.161	0.0698685	0.160884	0.0747979	-0.005 to 0.172
SM(d18:2/14:0)		-0.124644	-0.209 to -0.04	0.00390743	0.0180486	-0.125874	-0.215 to -0.018
SM(d18:2/16:0)		-0.0598347	-0.143 to 0.024	0.159971	0.292089	-0.0610195	-0.151 to 0.036
SM(d18:2/17:0)		-0.0514305	-0.134 to 0.031	0.223184	0.376018	-0.0519702	-0.135 to 0.038
SM(d18:2/18:0)		-0.0387901	-0.121 to 0.043	0.354354	0.51398	-0.0396508	-0.128 to 0.055
SM(d18:2/18:1)		-0.0575519	-0.14 to 0.025	0.173718	0.309897	-0.057873	-0.144 to 0.032
SM(d18:2/20:0)		-0.0475141	-0.131 to 0.036	0.265522	0.417095	-0.0474994	-0.141 to 0.047
SM(d18:2/22:0)		-0.0519866	-0.137 to 0.033	0.229987	0.382054	-0.0529064	-0.143 to 0.045
SM(d18:2/23:0)		-0.0444735	-0.13 to 0.041	0.308827	0.463538	-0.0464451	-0.136 to 0.047
SM(d18:2/24:0)		-0.0466456	-0.132 to 0.039	0.285629	0.439075	-0.045959	-0.137 to 0.044
SM(d19:1/24:1)		0.00355464	-0.078 to 0.085	0.931988	0.952862	0.00029891	-0.073 to 0.098
PA(34:1)		-0.0955254	-0.153 to -0.038	0.00112005	0.00695327	-0.0949438	-0.152 to -0.039
PA(36:1)		-0.0642695	-0.131 to 0.002	0.0587013	0.139731	-0.0632539	-0.135 to 0
PA(36:2)		-0.0891317	-0.144 to -0.034	0.00161436	0.00921134	-0.0888835	-0.145 to -0.034
PA(36:3)		-0.051706	-0.105 to 0.002	0.0580088	0.138935	-0.051881	-0.102 to 0
PA(36:4)		-0.0746877	-0.138 to -0.012	0.0201522	0.061326	-0.0752572	-0.143 to -0.019
PA(40:6)		-0.0559843	-0.132 to 0.02	0.147729	0.27778	-0.0564842	-0.132 to 0.018
PC(14:0_16:0)		-0.117573	-0.2 to -0.035	0.00548898	0.022942	-0.116287	-0.217 to -0.034
PC(14:0_20:4)		-0.117127	-0.201 to -0.033	0.00669587	0.0263566	-0.119996	-0.206 to -0.022
PC(14:0_22:6)		-0.160911	-0.245 to -0.077	0.00018758	0.00196705	-0.162965	-0.247 to -0.068
PC(15-MHDA_18:1)		-0.0594787	-0.141 to 0.022	0.154844	0.286775	-0.0621654	-0.146 to 0.026
PC(15-MHDA_18:2)		-0.080705	-0.163 to 0.002	0.0562417	0.135736	-0.0815358	-0.16 to -0.004
PC(15-MHDA_20:4)		-0.0617501	-0.145 to 0.021	0.14418	0.275576	-0.0631271	-0.149 to 0.028
PC(15-MHDA_22:6)		-0.0830879	-0.164 to -0.002	0.0442683	0.114127	-0.0820575	-0.161 to 0.006
PC(15:0_20:3)		-0.0513126	-0.136 to 0.033	0.233545	0.384779	-0.0529965	-0.142 to 0.043
PC(15:0_20:4)		-0.0594138	-0.142 to 0.023	0.158673	0.290748	-0.0598434	-0.145 to 0.037
PC(15:0_22:6)		-0.109624	-0.191 to -0.028	0.00854452	0.0317251	-0.109934	-0.196 to -0.028
PC(16:0_16:0)		-0.0499981	-0.133 to 0.033	0.24033	0.390159	-0.0513435	-0.135 to 0.039
PC(16:0_18:0)		-0.0589249	-0.141 to 0.024	0.162077	0.294149	-0.0582429	-0.143 to 0.031
PC(16:0_18:1)		-0.0902367	-0.173 to -0.007	0.0332172	0.0904441	-0.0907804	-0.193 to 0
PC(16:0_18:2)		-0.0751211	-0.159 to 0.008	0.0783685	0.173259	-0.0757087	-0.191 to 0.001
PC(16:0_18:3) (a)		-0.0638409	-0.147 to 0.02	0.133848	0.262871	-0.0633669	-0.154 to 0.023
PC(16:0_18:3) (b)		-0.021064	-0.102 to 0.06	0.610957	0.734697	-0.0218933	-0.112 to 0.064
PC(16:0_20:3) (a)		-0.106752	-0.191 to -0.023	0.0132519	0.0445174	-0.106703	-0.197 to -0.01
PC(16:0_20:3) (b)		0.0318906	-0.053 to 0.117	0.463137	0.617516	0.03079	-0.061 to 0.127
PC(16:0_20:4)		-0.018237	-0.101 to 0.065	0.667248	0.778624	-0.0183363	-0.106 to 0.075
PC(16:0_20:5)		0.030701	-0.052 to 0.114	0.468149	0.623128	0.03002	-0.056 to 0.124
PC(16:0_22:6)		-0.144304	-0.226 to -0.062	0.000594098	0.00434925	-0.142341	-0.228 to -0.066
PC(16:1_18:2)		-0.15987	-0.243 to -0.077	0.00017234	0.00188361	-0.159709	-0.246 to -0.071
PC(16:1_20:4)		-0.118628	-0.204 to -0.034	0.00637579	0.0252429	-0.116308	-0.213 to -0.019
PC(16:1_22:6)		-0.168829	-0.252 to -0.085	8.41574e-05	0.00100471	-0.168948	-0.261 to -0.078
PC(17:0_18:1)		-0.0776523	-0.16 to 0.005	0.0663301	0.155037	-0.0774799	-0.171 to 0.009
PC(17:0_18:2)		-0.141867	-0.225 to -0.059	0.000909067	0.00578241	-0.142909	-0.226 to -0.043
PC(17:0_20:4)		-0.0676482	-0.15 to 0.015	0.107368	0.221001	-0.0656037	-0.155 to 0.015
PC(17:0_22:6)		-0.105467	-0.186 to -0.025	0.0109117	0.0379707	-0.103786	-0.186 to -0.026
PC(17:1_18:2)		-0.136068	-0.219 to -0.053	0.00143026	0.00853757	-0.135575	-0.227 to -0.046
PC(18:0_18:1)		-0.103318	-0.186 to -0.02	0.0150889	0.0494049	-0.102167	-0.199 to -0.004
PC(18:0_18:2)		-0.118586	-0.202 to -0.035	0.00572058	0.0234877	-0.118206	-0.227 to -0.03
PC(18:0_20:3)		-0.0752895	-0.158 to 0.008	0.0760307	0.169314	-0.0747538	-0.171 to 0.024
PC(18:0_20:4)		-0.0759722	-0.159 to 0.007	0.0731524	0.165983	-0.0751839	-0.169 to 0.011
PC(18:0_22:4)		-0.108445	-0.193 to -0.024	0.0117568	0.0405479	-0.109205	-0.197 to -0.02
PC(18:0_22:5) (n3)		-0.0748751	-0.157 to 0.008	0.0761476	0.169314	-0.0758165	-0.169 to 0.01
PC(18:0_22:5) (n6)		-0.0891351	-0.173 to -0.005	0.0380509	0.101262	-0.0909488	-0.176 to 0.005
PC(18:0_22:6)		-0.0844611	-0.166 to -0.003	0.0430344	0.112063	-0.08449	-0.161 to 0.003
PC(18:1_18:1)		-0.088509	-0.172 to -0.005	0.038834	0.102471	-0.0868356	-0.184 to 0.001
PC(18:1_18:2)		-0.123893	-0.206 to -0.041	0.00335932	0.0163952	-0.123834	-0.214 to -0.044
PC(18:1_20:3)		-0.0995425	-0.183 to -0.016	0.0200713	0.0613202	-0.0993781	-0.191 to 0.001
PC(18:1_22:6) (a)		-0.0951871	-0.181 to -0.01	0.0291992	0.0823948	-0.0937454	-0.196 to -0.013
PC(18:1_22:6) (b)		-0.0801835	-0.162 to 0.002	0.0560748	0.135736	-0.0782996	-0.162 to 0.005
PC(18:2_18:2)		-0.17756	-0.261 to -0.094	3.25859e-05	0.000486282	-0.177243	-0.264 to -0.095
PC(18:2_20:5)		-0.105397	-0.19 to -0.021	0.0145846	0.0479562	-0.106123	-0.197 to -0.018
PC(20:0_20:4)		-0.112357	-0.198 to -0.027	0.0105493	0.036875	-0.111102	-0.212 to -0.033
PC(28:0)		-0.099051	-0.182 to -0.016	0.0194884	0.0602771	-0.0977847	-0.185 to -0.014
PC(31:0) (a)		-0.0339057	-0.116 to 0.048	0.418724	0.58127	-0.0332527	-0.122 to 0.058
PC(31:0) (b)		-0.0118855	-0.094 to 0.07	0.776359	0.853335	-0.0114854	-0.1 to 0.073
PC(32:1)		-0.0870183	-0.167 to -0.007	0.0339775	0.0918694	-0.0858748	-0.176 to -0.004
PC(32:2)		-0.145551	-0.227 to -0.065	0.000466628	0.00364244	-0.145124	-0.24 to -0.057
PC(33:0) (a)		-0.0355231	-0.117 to 0.046	0.394419	0.558521	-0.0381873	-0.116 to 0.046
PC(33:0) (b)		-0.0447519	-0.127 to 0.037	0.285859	0.439075	-0.0439951	-0.127 to 0.04
PC(33:1)		-0.081079	-0.163 to 0.001	0.0524688	0.128847	-0.0815122	-0.166 to 0.011
PC(33:2)		-0.100879	-0.183 to -0.018	0.0168649	0.0540792	-0.10092	-0.194 to 0
PC(34:5)		-0.045163	-0.13 to 0.04	0.298016	0.449923	-0.0449379	-0.141 to 0.046
PC(35:5)		-0.00467894	-0.087 to 0.078	0.91156	0.939404	-0.00216387	-0.087 to 0.09
PC(36:6) (a)		-0.0428167	-0.127 to 0.041	0.319835	0.471848	-0.0428201	-0.129 to 0.052
PC(38:2)		-0.118093	-0.202 to -0.034	0.00620834	0.0248334	-0.113854	-0.214 to -0.036
PC(38:4) (b)		-0.091582	-0.176 to -0.007	0.034923	0.0934492	-0.0924227	-0.173 to 0.002
PC(38:5) (a)		-0.0940938	-0.178 to -0.01	0.0283138	0.0801879	-0.0960044	-0.185 to 0
PC(38:5) (b)		-0.0426509	-0.126 to 0.041	0.316104	0.469018	-0.0434009	-0.133 to 0.049
PC(38:6) (a)		-0.120489	-0.206 to -0.035	0.00579234	0.0235333	-0.121833	-0.215 to -0.03
PC(38:7)(c)		-0.154688	-0.236 to -0.073	0.000219322	0.00219057	-0.154716	-0.246 to -0.069
PC(39:5)(a)		-0.122129	-0.204 to -0.04	0.00360898	0.0170766	-0.124521	-0.199 to -0.035
PC(39:5)(b)		-0.0927794	-0.175 to -0.011	0.0272268	0.077392	-0.0906548	-0.18 to -0.008
PC(40:10)		0.00294608	-0.062 to 0.068	0.929531	0.951605	0.00471009	-0.067 to 0.065
PC(40:7) (a)		-0.150811	-0.235 to -0.067	0.000467801	0.00364244	-0.151695	-0.246 to -0.047
PC(40:8)		-0.210499	-0.293 to -0.128	8.62536e-07	3.18727e-05	-0.20874	-0.294 to -0.113
PC(44:12)		-0.211958	-0.294 to -0.13	4.95954e-07	1.9243e-05	-0.215313	-0.29 to -0.125
PC(O-16:0/16:0)		-0.0331318	-0.117 to 0.051	0.438159	0.598359	-0.032883	-0.126 to 0.061
PC(O-16:0/20:3)		0.000101076	-0.085 to 0.085	0.998133	0.999781	0.000841439	-0.096 to 0.091
PC(O-16:0/20:4)		-0.0399719	-0.124 to 0.044	0.349422	0.509683	-0.0421015	-0.129 to 0.055
PC(O-16:0/22:6)		-0.0185453	-0.1 to 0.063	0.656714	0.772137	-0.0196913	-0.099 to 0.067
PC(O-18:0/18:1)		-0.0709002	-0.155 to 0.013	0.0988853	0.207392	-0.0731427	-0.155 to 0.028
PC(O-18:0/18:2)		-0.0800855	-0.165 to 0.005	0.0659451	0.154602	-0.0802811	-0.185 to 0.004
PC(O-18:0/20:4)		-0.0959368	-0.178 to -0.014	0.0221996	0.066513	-0.0938666	-0.191 to -0.02
PC(O-18:0/22:6)		-0.0672949	-0.148 to 0.014	0.104306	0.216421	-0.066424	-0.147 to 0.015
PC(O-18:1/18:1)		-0.0672884	-0.152 to 0.018	0.120991	0.242691	-0.0646841	-0.17 to 0.016
PC(O-18:1/18:2)		-0.0630107	-0.146 to 0.02	0.135449	0.264092	-0.0606029	-0.162 to 0.023
PC(O-32:1)		-0.0421887	-0.125 to 0.041	0.319034	0.471563	-0.0425944	-0.126 to 0.061
PC(O-32:2)		-0.096536	-0.18 to -0.013	0.0239578	0.0701558	-0.0936574	-0.192 to -0.002
PC(O-34:1)		-0.0454675	-0.128 to 0.038	0.283372	0.437171	-0.0463434	-0.144 to 0.041
PC(O-34:2)		-0.0376736	-0.122 to 0.047	0.383286	0.546539	-0.0375743	-0.125 to 0.04
PC(O-34:4)		-0.0835216	-0.167 to 0	0.0516376	0.128029	-0.083411	-0.178 to 0.013
PC(O-35:4)		-0.0188479	-0.101 to 0.064	0.654843	0.771105	-0.0174448	-0.106 to 0.068
PC(O-36:0)		-0.0506349	-0.133 to 0.031	0.225994	0.377143	-0.0512451	-0.138 to 0.038
PC(O-36:5)		0.0198642	-0.062 to 0.102	0.636549	0.757999	0.0190118	-0.068 to 0.109
PC(O-38:5)		-0.0617484	-0.146 to 0.023	0.151715	0.282425	-0.0600677	-0.146 to 0.023
PC(O-40:5)		-0.0604997	-0.143 to 0.022	0.151426	0.282425	-0.0611948	-0.146 to 0.03
PC(O-40:7) (a)		-0.0277794	-0.111 to 0.055	0.512068	0.666071	-0.0265826	-0.104 to 0.046
PC(O-40:7) (b)		-0.0156216	-0.1 to 0.069	0.717904	0.814873	-0.0131325	-0.12 to 0.071
PC(P-15:0/20:4) (a)		0.0124883	-0.071 to 0.096	0.768644	0.848405	0.0123008	-0.074 to 0.108
PC(P-15:0/20:4) (b)		-0.0611194	-0.144 to 0.022	0.147839	0.27778	-0.0620969	-0.15 to 0.027
PC(P-16:0/14:0)		-0.204587	-0.287 to -0.122	1.51693e-06	4.20407e-05	-0.204494	-0.293 to -0.112
PC(P-16:0/16:0)		-0.158545	-0.242 to -0.075	0.000203598	0.00210656	-0.158568	-0.254 to -0.069
PC(P-16:0/16:1)		-0.164343	-0.247 to -0.082	0.000108431	0.00125586	-0.163756	-0.257 to -0.069
PC(P-16:0/18:0)		-0.116857	-0.2 to -0.034	0.00597386	0.0241443	-0.117161	-0.209 to -0.028
PC(P-16:0/18:1)		-0.152933	-0.237 to -0.069	0.000402593	0.00332353	-0.153193	-0.246 to -0.063
PC(P-16:0/18:2)		-0.173065	-0.258 to -0.088	6.98768e-05	0.00090374	-0.172541	-0.271 to -0.092
PC(P-16:0/18:3)		-0.0805241	-0.165 to 0.004	0.0631511	0.149406	-0.0836213	-0.175 to 0.006
PC(P-16:0/20:4)		-0.171352	-0.254 to -0.089	5.22771e-05	0.000725152	-0.171953	-0.263 to -0.087
PC(P-16:0/20:5)		-0.0592944	-0.141 to 0.022	0.15334	0.284669	-0.0581956	-0.136 to 0.028
PC(P-16:0/22:6)		-0.141963	-0.223 to -0.061	0.000656194	0.00467162	-0.141762	-0.22 to -0.058
PC(P-17:0/20:4) (a)		-0.096217	-0.177 to -0.015	0.0200564	0.0613202	-0.0968117	-0.176 to -0.012
PC(P-17:0/20:4) (b)		-0.124898	-0.206 to -0.044	0.00264929	0.0137057	-0.125869	-0.209 to -0.041
PC(P-18:0/18:2)		-0.175143	-0.26 to -0.091	5.63199e-05	0.000766741	-0.178469	-0.263 to -0.084
PC(P-18:0/20:4)		-0.139535	-0.221 to -0.059	0.000785343	0.00520877	-0.141062	-0.219 to -0.06
PC(P-18:0/22:5)		-0.100321	-0.182 to -0.019	0.0157897	0.0508713	-0.10123	-0.182 to -0.018
PC(P-18:0/22:6)		-0.108597	-0.189 to -0.028	0.00850039	0.031713	-0.109572	-0.193 to -0.034
PC(P-18:1/18:1)		-0.0977477	-0.183 to -0.012	0.0250595	0.0722906	-0.100664	-0.179 to 0
PC(P-18:1/22:6)		-0.133627	-0.216 to -0.052	0.00146967	0.00870586	-0.133133	-0.211 to -0.049
PC(P-20:0/20:4)		-0.155387	-0.237 to -0.074	0.000213847	0.00218349	-0.156307	-0.23 to -0.071
PC(P-35:2)(a)		-0.0943011	-0.177 to -0.012	0.024967	0.0722906	-0.0955215	-0.171 to -0.006
PC(P-35:2)(b)		-0.117261	-0.2 to -0.034	0.00575923	0.0235219	-0.117037	-0.209 to -0.033
PC(P-36:3)		-0.14145	-0.224 to -0.059	0.00087523	0.00570738	-0.141039	-0.24 to -0.052
PC(P-38:5) (a)		-0.15622	-0.239 to -0.074	0.000220186	0.00219057	-0.156584	-0.243 to -0.068
PC(P-38:5) (b)		-0.123061	-0.205 to -0.041	0.00345931	0.0165705	-0.123304	-0.205 to -0.03
LPC(14:0) [sn1]		-0.115772	-0.189 to -0.043	0.00193838	0.010668	-0.11542	-0.194 to -0.042
LPC(14:0) [sn2]		-0.131365	-0.204 to -0.058	0.000446143	0.00360633	-0.130929	-0.209 to -0.052
LPC(15-MHDA) [sn1] [104_sn1]		-0.0867803	-0.165 to -0.009	0.0297049	0.0832165	-0.0866263	-0.162 to -0.007
LPC(15-MHDA) [sn1] / LPC(17:0) [sn2]		-0.110914	-0.186 to -0.036	0.00372241	0.0175066	-0.110833	-0.18 to -0.029
LPC(15-MHDA) [sn2]		-0.0870488	-0.166 to -0.008	0.0305512	0.0849741	-0.0868055	-0.166 to -0.01
LPC(15:0) [sn1]		-0.0920338	-0.164 to -0.02	0.0124098	0.0424229	-0.0944099	-0.162 to -0.011
LPC(15:0) [sn2]		-0.0821816	-0.157 to -0.007	0.0318235	0.0875709	-0.082288	-0.155 to -0.01
LPC(16:0) [sn1]		-0.111507	-0.169 to -0.054	0.000142134	0.00159849	-0.112443	-0.171 to -0.042
LPC(16:0) [sn2]		-0.103516	-0.159 to -0.048	0.000298318	0.00260107	-0.10305	-0.167 to -0.04
LPC(16:1) [sn1]		-0.127384	-0.197 to -0.057	0.000392956	0.00327886	-0.128707	-0.192 to -0.047
LPC(16:1) [sn2]		-0.120267	-0.194 to -0.046	0.0015243	0.00889366	-0.119832	-0.2 to -0.04
LPC(17:0) [sn1]		-0.128792	-0.195 to -0.062	0.000158256	0.00175438	-0.129064	-0.189 to -0.055
LPC(17:1) (a) [sn1] [104_sn1]		-0.100256	-0.175 to -0.025	0.00919999	0.0335173	-0.100051	-0.174 to -0.015
LPC(17:1) [sn1] (a) / LPC(17:1) [sn2] (b)		-0.104555	-0.181 to -0.028	0.00733915	0.0283342	-0.106296	-0.175 to -0.02
LPC(17:1) [sn1] (b)		-0.0599232	-0.141 to 0.021	0.149191	0.279642	-0.0606013	-0.144 to 0.02
LPC(17:1) [sn2] (a)		-0.105741	-0.183 to -0.028	0.00768275	0.0292246	-0.105918	-0.189 to -0.018
LPC(18:0) [sn1]		-0.148985	-0.208 to -0.09	1.13114e-06	3.52569e-05	-0.147801	-0.207 to -0.084
LPC(18:0) [sn2]		-0.143644	-0.204 to -0.083	4.37658e-06	8.70827e-05	-0.14226	-0.211 to -0.078
LPC(18:1) [sn1]		-0.165378	-0.233 to -0.098	1.85927e-06	4.50874e-05	-0.166907	-0.231 to -0.09
LPC(18:1) [sn2]		-0.163275	-0.235 to -0.092	8.81703e-06	0.00016315	-0.164026	-0.241 to -0.081
LPC(18:2) [sn1]		-0.237309	-0.318 to -0.156	1.55978e-08	1.21039e-06	-0.235959	-0.321 to -0.152
LPC(18:2) [sn2]		-0.221623	-0.303 to -0.14	1.43263e-07	7.41148e-06	-0.222534	-0.304 to -0.126
LPC(18:3) (a) [sn1] [104_sn1]		-0.103016	-0.181 to -0.025	0.00975189	0.0350346	-0.103863	-0.186 to -0.022
LPC(18:3) [sn1] (a)/LPC(18:3) [sn2] (b)		-0.108243	-0.186 to -0.03	0.00672501	0.0263566	-0.106742	-0.193 to -0.03
LPC(18:3) [sn1] (b)		-0.109451	-0.189 to -0.03	0.00694695	0.0270896	-0.108008	-0.191 to -0.028
LPC(18:3) [sn2] (a)		-0.101225	-0.181 to -0.021	0.0133665	0.0445341	-0.100421	-0.185 to -0.017
LPC(19:0) (a) [sn1] [104_sn1]		-0.122396	-0.2 to -0.045	0.0019914	0.0108065	-0.123614	-0.197 to -0.044
LPC(19:0) [sn1] (a) / LPC(19:0) [sn2] (b)		-0.166549	-0.236 to -0.097	3.56354e-06	7.73076e-05	-0.164555	-0.239 to -0.09
LPC(19:0) [sn1] (b)		-0.170183	-0.238 to -0.102	1.12583e-06	3.52569e-05	-0.167837	-0.236 to -0.091
LPC(19:0) [sn2] (a)		-0.124244	-0.203 to -0.046	0.00196979	0.0107645	-0.121965	-0.206 to -0.034
LPC(19:1) (a)		-0.0960615	-0.169 to -0.023	0.0103591	0.0364523	-0.0943294	-0.168 to -0.013
LPC(19:1) (b)		-0.104966	-0.179 to -0.031	0.0053569	0.0225921	-0.102687	-0.181 to -0.028
LPC(19:1) (c)		-0.103619	-0.182 to -0.026	0.00953088	0.0343998	-0.104608	-0.18 to -0.021
LPC(20:0) [sn1]		-0.193428	-0.255 to -0.131	1.89252e-09	3.67149e-07	-0.191699	-0.26 to -0.122
LPC(20:0) [sn2]		-0.18623	-0.249 to -0.123	1.14538e-08	1.11102e-06	-0.184118	-0.25 to -0.117
LPC(20:1) [sn1]		-0.106457	-0.159 to -0.054	8.12841e-05	0.000991934	-0.106073	-0.162 to -0.051
LPC(20:1) [sn2]		-0.0821916	-0.14 to -0.024	0.0056831	0.0234579	-0.0808604	-0.142 to -0.016
LPC(20:2) [sn1]		-0.167199	-0.231 to -0.103	4.24434e-07	1.82978e-05	-0.169566	-0.236 to -0.096
LPC(20:2) [sn2]		-0.170495	-0.24 to -0.101	2.06353e-06	4.85242e-05	-0.169284	-0.243 to -0.102
LPC(20:3) [sn1]		-0.131401	-0.212 to -0.051	0.00151744	0.00889366	-0.130132	-0.219 to -0.028
LPC(20:3) [sn2]		-0.124592	-0.207 to -0.043	0.00304374	0.0152383	-0.125184	-0.214 to -0.032
LPC(20:4) [sn1]		-0.0965401	-0.176 to -0.017	0.0176209	0.0560403	-0.10023	-0.178 to -0.004
LPC(20:4) [sn2]		-0.0740902	-0.155 to 0.007	0.0738995	0.166372	-0.0740989	-0.161 to 0.013
LPC(20:5) [sn1]		0.0318001	-0.05 to 0.114	0.446862	0.60397	0.0315239	-0.051 to 0.119
LPC(20:5) [sn2]		0.0274623	-0.055 to 0.11	0.512733	0.666071	0.0272587	-0.06 to 0.109
LPC(22:0) [sn1]		-0.212426	-0.291 to -0.134	1.61771e-07	7.8459e-06	-0.207885	-0.303 to -0.135
LPC(22:0) [sn2]		-0.202488	-0.282 to -0.122	9.42126e-07	3.32314e-05	-0.200236	-0.29 to -0.115
LPC(22:1) [sn1]		-0.206204	-0.278 to -0.135	2.69482e-08	1.90107e-06	-0.207098	-0.274 to -0.129
LPC(22:1) [sn2]		-0.180348	-0.255 to -0.106	2.44978e-06	5.59125e-05	-0.178558	-0.259 to -0.103
LPC(22:4) [sn1]		-0.13388	-0.207 to -0.061	0.000370254	0.00315733	-0.135495	-0.22 to -0.057
LPC(22:4) [sn2]		-0.14225	-0.219 to -0.065	0.000326163	0.00281225	-0.143536	-0.217 to -0.062
LPC(22:5) (n3) [sn1] [104_sn1]		-0.113731	-0.194 to -0.034	0.00551049	0.022942	-0.114561	-0.191 to -0.024
LPC(22:5) [sn1] (n3)/LPC(22:5) [sn2] (n6)		-0.120122	-0.2 to -0.04	0.00345083	0.0165705	-0.121808	-0.201 to -0.036
LPC(22:5) [sn1] (n6)		-0.146261	-0.227 to -0.065	0.000429217	0.00350602	-0.147077	-0.229 to -0.063
LPC(22:5) [sn2] (n3)		-0.122384	-0.203 to -0.042	0.00299518	0.0150926	-0.12313	-0.207 to -0.036
LPC(22:6) [sn1]		-0.139907	-0.22 to -0.06	0.000671952	0.00469769	-0.142074	-0.224 to -0.054
LPC(22:6) [sn2]		-0.13511	-0.216 to -0.054	0.00114568	0.00705595	-0.135563	-0.211 to -0.043
LPC(24:0) [sn1]		-0.16668	-0.249 to -0.084	8.096e-05	0.000991934	-0.167531	-0.26 to -0.081
LPC(24:0) [sn2]		-0.15587	-0.239 to -0.073	0.000242796	0.00228588	-0.154801	-0.246 to -0.075
LPC(26:0) [sn1]		-0.14169	-0.227 to -0.056	0.00119683	0.00727771	-0.14147	-0.221 to -0.052
LPC(26:0) [sn2]		-0.147734	-0.232 to -0.063	0.000637547	0.0045809	-0.144995	-0.24 to -0.056
LPC(O-16:0)		-0.0481126	-0.104 to 0.008	0.0938476	0.198435	-0.0494745	-0.108 to 0.011
LPC(O-18:0)		-0.106882	-0.175 to -0.039	0.00224669	0.0119413	-0.106565	-0.183 to -0.029
LPC(O-18:1)		-0.0295699	-0.078 to 0.019	0.23113	0.382054	-0.0281159	-0.078 to 0.027
LPC(O-20:0)		-0.131758	-0.206 to -0.058	0.000542545	0.00408752	-0.130926	-0.221 to -0.036
LPC(O-20:1)		-0.0448562	-0.107 to 0.017	0.156292	0.288768	-0.0468131	-0.105 to 0.023
LPC(O-22:0)		-0.155355	-0.238 to -0.072	0.000263774	0.00235274	-0.154393	-0.255 to -0.059
LPC(O-22:1)		-0.127414	-0.206 to -0.049	0.00153751	0.00890379	-0.127295	-0.206 to -0.04
LPC(O-24:0)		-0.114566	-0.199 to -0.03	0.00838526	0.031713	-0.115765	-0.212 to -0.01
LPC(O-24:1)		-0.114965	-0.199 to -0.031	0.00744999	0.0286197	-0.114805	-0.211 to -0.02
LPC(O-24:2)		-0.139423	-0.218 to -0.061	0.000556235	0.00415037	-0.139244	-0.23 to -0.055
LPC(P-16:0)		-0.159403	-0.216 to -0.103	5.67523e-08	3.66998e-06	-0.159353	-0.219 to -0.095
LPC(P-17:0) (a)		-0.1213	-0.199 to -0.044	0.00232701	0.0121192	-0.120072	-0.204 to -0.045
LPC(P-17:0) (b)		-0.160968	-0.235 to -0.087	2.30778e-05	0.000381029	-0.161225	-0.23 to -0.083
LPC(P-18:0)		-0.179014	-0.251 to -0.107	1.62544e-06	4.34945e-05	-0.179116	-0.254 to -0.094
LPC(P-18:1)		-0.11588	-0.172 to -0.059	6.52193e-05	0.0008578	-0.115243	-0.173 to -0.058
LPC(P-20:0)		-0.264271	-0.342 to -0.186	7.46072e-11	2.89476e-08	-0.266053	-0.343 to -0.175
PE(15-MHDA_18:1)		-0.0436847	-0.129 to 0.041	0.313374	0.466752	-0.0443886	-0.126 to 0.046
PE(15-MHDA_18:2)		-0.0459733	-0.131 to 0.039	0.287259	0.43941	-0.0444086	-0.127 to 0.036
PE(15-MHDA_20:4)		-0.0448252	-0.128 to 0.038	0.289832	0.441003	-0.0450925	-0.124 to 0.037
PE(15-MHDA_22:6)		-0.0558469	-0.138 to 0.027	0.185341	0.327618	-0.0586089	-0.128 to 0.024
PE(16:0_16:0)		-0.0237516	-0.106 to 0.059	0.57346	0.71315	-0.0239284	-0.104 to 0.062
PE(16:0_16:1)		0.0188323	-0.066 to 0.104	0.664547	0.77664	0.0193228	-0.07 to 0.103
PE(16:0_18:1)		0.0155812	-0.068 to 0.099	0.713553	0.814873	0.0179806	-0.074 to 0.095
PE(16:0_18:2)		-0.0509755	-0.133 to 0.031	0.222727	0.376018	-0.0503692	-0.136 to 0.023
PE(16:0_18:3) (a)		-0.0216737	-0.105 to 0.061	0.60962	0.734697	-0.0199597	-0.108 to 0.064
PE(16:0_18:3) (b)		0.0211673	-0.061 to 0.103	0.6131	0.734697	0.024182	-0.068 to 0.1
PE(16:0_20:3)		-0.0296223	-0.114 to 0.055	0.493364	0.652215	-0.0287217	-0.106 to 0.062
PE(16:0_20:4)		-0.0623114	-0.146 to 0.022	0.145646	0.276335	-0.0640218	-0.14 to 0.03
PE(16:0_20:5)		0.0133775	-0.07 to 0.097	0.754519	0.836438	0.0130849	-0.065 to 0.089
PE(16:0_22:6)		-0.0279309	-0.112 to 0.056	0.512984	0.666071	-0.0289717	-0.109 to 0.054
PE(16:1_18:2)		-0.071445	-0.155 to 0.012	0.0937431	0.198435	-0.0727862	-0.151 to 0.021
PE(16:1_20:4)		-0.0665621	-0.15 to 0.017	0.119708	0.241282	-0.0670445	-0.151 to 0.03
PE(17:0_18:1)		-0.0231816	-0.108 to 0.062	0.592664	0.724264	-0.0234397	-0.101 to 0.062
PE(17:0_18:2)		-0.066391	-0.15 to 0.017	0.119547	0.241282	-0.0661131	-0.153 to 0.013
PE(17:0_20:4)		-0.0485987	-0.133 to 0.036	0.260235	0.412871	-0.048283	-0.131 to 0.041
PE(17:0_22:6)		-0.0504619	-0.133 to 0.032	0.230849	0.382054	-0.0520239	-0.125 to 0.024
PE(18:0_18:1)		-0.0189712	-0.103 to 0.065	0.658071	0.772561	-0.0187783	-0.101 to 0.069
PE(18:0_18:2)		-0.052432	-0.135 to 0.03	0.214459	0.365793	-0.0520641	-0.133 to 0.021
PE(18:0_20:3) (a)		-0.00972067	-0.094 to 0.074	0.820241	0.881589	-0.00935306	-0.093 to 0.073
PE(18:0_20:3) (b)		0.0317185	-0.051 to 0.115	0.454112	0.611789	0.0295329	-0.049 to 0.122
PE(18:0_20:4)		-0.0469852	-0.131 to 0.037	0.272881	0.423512	-0.0468586	-0.134 to 0.032
PE(18:0_22:4)		-0.00402837	-0.085 to 0.077	0.922545	0.946951	-0.00328141	-0.086 to 0.084
PE(18:0_22:5) (n3)		-0.0266035	-0.11 to 0.056	0.529771	0.679508	-0.024591	-0.109 to 0.052
PE(18:0_22:5) (n6)		-0.0229691	-0.107 to 0.061	0.592404	0.724264	-0.0256615	-0.106 to 0.067
PE(18:0_22:6)		-0.0110932	-0.094 to 0.072	0.792573	0.863816	-0.011949	-0.084 to 0.061
PE(18:1_18:1)		-0.0356271	-0.119 to 0.048	0.402509	0.564823	-0.0352117	-0.118 to 0.052
PE(18:1_18:2)		-0.0527138	-0.136 to 0.03	0.214479	0.365793	-0.0530304	-0.132 to 0.036
PE(18:1_22:6) (a)		-0.0559075	-0.141 to 0.029	0.197343	0.344906	-0.0584121	-0.129 to 0.027
PE(18:1_22:6) (b)		-0.052577	-0.136 to 0.031	0.216522	0.367661	-0.0539957	-0.132 to 0.029
PE(20:0_20:4)		-0.0324829	-0.103 to 0.038	0.369358	0.530949	-0.0324263	-0.103 to 0.042
PE(36:0)		0.0441449	-0.041 to 0.129	0.309717	0.463977	0.0443393	-0.041 to 0.142
PE(38:5) (a)		-0.0666766	-0.151 to 0.018	0.123698	0.246002	-0.064385	-0.151 to 0.02
PE(38:5) (b)		-0.0330731	-0.117 to 0.051	0.441335	0.600835	-0.0343748	-0.109 to 0.049
PE(O-16:0/18:2)		-0.172165	-0.255 to -0.089	5.83112e-05	0.000780164	-0.1743	-0.256 to -0.087
PE(O-16:0/20:3)		-0.120592	-0.203 to -0.038	0.00449151	0.0199207	-0.119633	-0.21 to -0.034
PE(O-16:0/20:4)		-0.1967	-0.28 to -0.114	4.21821e-06	8.61403e-05	-0.199236	-0.281 to -0.11
PE(O-16:0/22:4)		-0.100621	-0.185 to -0.017	0.0192792	0.0600829	-0.100708	-0.19 to -0.019
PE(O-16:0/22:6)		-0.200961	-0.282 to -0.12	1.69236e-06	4.37757e-05	-0.20174	-0.285 to -0.116
PE(O-18:0/20:4)		-0.123193	-0.205 to -0.041	0.00329551	0.0162887	-0.123525	-0.207 to -0.036
PE(O-18:0/22:5)		-0.0749601	-0.156 to 0.006	0.0715014	0.162713	-0.074835	-0.155 to 0.014
PE(O-18:0/22:6)		-0.146985	-0.228 to -0.066	0.000383037	0.00323083	-0.148855	-0.224 to -0.066
PE(O-18:1/18:2)		-0.206788	-0.289 to -0.124	1.13585e-06	3.52569e-05	-0.208938	-0.289 to -0.12
PE(O-18:1/22:6)		-0.179056	-0.26 to -0.098	1.63544e-05	0.000282023	-0.179572	-0.26 to -0.089
PE(O-34:1)		-0.159018	-0.242 to -0.076	0.000177661	0.00188856	-0.157927	-0.25 to -0.069
PE(O-36:5)		-0.1381	-0.219 to -0.057	0.000909091	0.00578241	-0.138601	-0.229 to -0.058
PE(O-38:5) (a)		-0.123529	-0.206 to -0.041	0.00339765	0.0164786	-0.123003	-0.21 to -0.039
PE(O-38:5) (b)		-0.118901	-0.201 to -0.037	0.0046427	0.0202401	-0.116017	-0.202 to -0.032
PE(P-15:0/20:4) (a)		0.0238001	-0.06 to 0.107	0.57647	0.714601	0.0254764	-0.065 to 0.104
PE(P-15:0/20:4) (b)		0.0245738	-0.06 to 0.109	0.569949	0.711062	0.0245288	-0.065 to 0.111
PE(P-15:0/22:6) (a)		0.0257124	-0.057 to 0.108	0.541632	0.690159	0.0275246	-0.052 to 0.112
PE(P-15:0/22:6) (b)		-0.0991649	-0.181 to -0.017	0.0182146	0.0574576	-0.100213	-0.182 to -0.016
PE(P-16:0/18:1)		-0.0627294	-0.146 to 0.021	0.141476	0.27242	-0.0642937	-0.15 to 0.029
PE(P-16:0/18:2)		-0.082936	-0.168 to 0.002	0.0554544	0.134898	-0.0863215	-0.166 to 0.012
PE(P-16:0/18:3)		-0.0459131	-0.13 to 0.038	0.286304	0.439075	-0.0450827	-0.136 to 0.043
PE(P-16:0/20:3) (a)		-0.0757255	-0.159 to 0.007	0.0738175	0.166372	-0.0752356	-0.164 to 0.021
PE(P-16:0/20:3) (b)		-0.0216193	-0.104 to 0.061	0.607072	0.734697	-0.0192667	-0.115 to 0.061
PE(P-16:0/20:4)		-0.0802359	-0.162 to 0.001	0.0544071	0.132767	-0.082341	-0.164 to 0.008
PE(P-16:0/20:5)		-0.0121485	-0.093 to 0.069	0.769666	0.848405	-0.0118743	-0.1 to 0.075
PE(P-16:0/22:4)		-0.0941365	-0.175 to -0.013	0.0229765	0.0680525	-0.0962301	-0.181 to -0.009
PE(P-16:0/22:5) (n3)		-0.0788873	-0.161 to 0.003	0.0596553	0.141567	-0.0795288	-0.169 to 0.011
PE(P-16:0/22:5) (n6)		-0.0968521	-0.181 to -0.013	0.0239375	0.0701558	-0.0972736	-0.192 to -0.018
PE(P-16:0/22:6)		-0.130458	-0.212 to -0.049	0.00171633	0.00958179	-0.130662	-0.209 to -0.043
PE(P-17:0/20:4) (a)		-0.0316554	-0.112 to 0.049	0.442445	0.601292	-0.0314969	-0.115 to 0.049
PE(P-17:0/20:4) (b)		-0.0676341	-0.149 to 0.013	0.102235	0.213264	-0.0677452	-0.151 to 0.011
PE(P-17:0/22:6) (a)		-0.0461241	-0.127 to 0.034	0.261236	0.412871	-0.0456364	-0.127 to 0.038
PE(P-17:0/22:6) (b)		-0.107783	-0.188 to -0.027	0.00892738	0.0328324	-0.107874	-0.183 to -0.031
PE(P-18:0/18:1)		-0.050212	-0.134 to 0.033	0.2395	0.389628	-0.051211	-0.129 to 0.044
PE(P-18:0/18:2)		-0.0975951	-0.183 to -0.012	0.0252917	0.0726901	-0.0978025	-0.189 to -0.012
PE(P-18:0/18:3)		-0.0322505	-0.117 to 0.053	0.457045	0.614672	-0.032128	-0.118 to 0.053
PE(P-18:0/20:3) (a)		-0.104011	-0.186 to -0.022	0.0131145	0.0442472	-0.102305	-0.193 to -0.022
PE(P-18:0/20:3) (b)		-0.046346	-0.128 to 0.035	0.264597	0.416486	-0.0449701	-0.14 to 0.035
PE(P-18:0/20:4)		-0.0793329	-0.159 to 0.001	0.0522153	0.128632	-0.0804648	-0.16 to 0.008
PE(P-18:0/20:5)		-0.032094	-0.113 to 0.049	0.435962	0.598359	-0.0324784	-0.111 to 0.053
PE(P-18:0/22:4)		-0.0927332	-0.17 to -0.015	0.0194968	0.0602771	-0.0952007	-0.163 to -0.01
PE(P-18:0/22:5) (n3)		-0.0619224	-0.143 to 0.019	0.135204	0.264092	-0.0612752	-0.162 to 0.012
PE(P-18:0/22:5) (n6)		-0.104168	-0.187 to -0.021	0.0141052	0.0467763	-0.10576	-0.194 to -0.018
PE(P-18:0/22:6)		-0.109733	-0.189 to -0.03	0.00718187	0.0278656	-0.111607	-0.183 to -0.028
PE(P-18:1/18:1)		-0.105659	-0.189 to -0.022	0.0133717	0.0445341	-0.105574	-0.201 to -0.023
PE(P-18:1/18:1) (a)		-0.110128	-0.194 to -0.027	0.0100673	0.0359955	-0.110575	-0.197 to -0.022
PE(P-18:1/18:1) (b)		-0.0622197	-0.145 to 0.021	0.1421	0.272944	-0.0608259	-0.148 to 0.021
PE(P-18:1/18:2) (a)		-0.13087	-0.215 to -0.047	0.00229644	0.0121192	-0.128454	-0.223 to -0.055
PE(P-18:1/18:2) (b)		-0.091673	-0.176 to -0.008	0.0326809	0.089297	-0.0912139	-0.179 to -0.011
PE(P-18:1/18:3)		-0.0751627	-0.16 to 0.009	0.0819864	0.180003	-0.0751871	-0.167 to 0.004
PE(P-18:1/20:3) (a)		-0.0998352	-0.183 to -0.017	0.0184265	0.0578906	-0.0984606	-0.186 to -0.012
PE(P-18:1/20:3) (b)		-0.0531779	-0.136 to 0.029	0.206215	0.355606	-0.0531969	-0.135 to 0.037
PE(P-18:1/20:4) (a)		-0.118103	-0.2 to -0.036	0.00502435	0.0214225	-0.119576	-0.197 to -0.035
PE(P-18:1/20:4) (b)		-0.0616173	-0.143 to 0.02	0.13858	0.268174	-0.0635736	-0.146 to 0.018
PE(P-18:1/20:5) (a)		-0.0355214	-0.117 to 0.046	0.39591	0.558592	-0.0354891	-0.115 to 0.052
PE(P-18:1/20:5) (b)		-0.0315799	-0.113 to 0.05	0.44753	0.60397	-0.0311877	-0.112 to 0.047
PE(P-18:1/22:4)		-0.161487	-0.245 to -0.078	0.000177051	0.00188856	-0.160207	-0.245 to -0.074
PE(P-18:1/22:5) (a)		-0.0757258	-0.157 to 0.006	0.0696208	0.160791	-0.0778199	-0.153 to 0.013
PE(P-18:1/22:5) (b)		-0.134502	-0.218 to -0.051	0.00165037	0.00934809	-0.136339	-0.214 to -0.041
PE(P-18:1/22:6) (a)		-0.139654	-0.221 to -0.058	0.000827383	0.0054411	-0.138531	-0.223 to -0.06
PE(P-18:1/22:6) (b)		-0.09165	-0.173 to -0.011	0.0267259	0.0762473	-0.0926459	-0.171 to -0.006
PE(P-19:0/20:4) (a)		-0.0369794	-0.118 to 0.044	0.369475	0.530949	-0.0353891	-0.121 to 0.042
PE(P-19:0/20:4) (b)		-0.0849711	-0.167 to -0.003	0.0419065	0.109493	-0.0844484	-0.16 to -0.002
PE(P-20:0/18:1)		-0.0478113	-0.133 to 0.037	0.272224	0.423339	-0.0485126	-0.133 to 0.044
PE(P-20:0/18:2)		-0.0785412	-0.163 to 0.006	0.0678873	0.157726	-0.0795093	-0.168 to 0.011
PE(P-20:0/20:4)		-0.118061	-0.2 to -0.036	0.00492514	0.0211155	-0.119622	-0.194 to -0.034
PE(P-20:0/22:6)		-0.08504	-0.168 to -0.002	0.0439665	0.113727	-0.0867913	-0.159 to -0.001
PE(P-20:1/20:4)		0.103724	0.02 to 0.187	0.0152735	0.0495909	0.100878	0.021 to 0.197
PE(P-20:1/22:6)		0.0394205	-0.043 to 0.122	0.351191	0.511302	0.0397889	-0.042 to 0.119
LPE(16:0) [sn1]		-0.233202	-0.312 to -0.154	1.34958e-08	1.16364e-06	-0.233831	-0.322 to -0.151
LPE(16:0) [sn2]		-0.241342	-0.321 to -0.162	4.99802e-09	5.54066e-07	-0.243523	-0.327 to -0.153
LPE(17:0) [sn1]		-0.026584	-0.112 to 0.058	0.540412	0.689737	-0.0234943	-0.11 to 0.046
LPE(17:0) [sn2]		-0.0966561	-0.18 to -0.013	0.0241315	0.0703988	-0.094948	-0.18 to -0.012
LPE(18:0) [sn1]		-0.163525	-0.232 to -0.095	4.14236e-06	8.61403e-05	-0.164098	-0.235 to -0.083
LPE(18:0) [sn2]		-0.161717	-0.232 to -0.091	8.83026e-06	0.00016315	-0.160472	-0.236 to -0.09
LPE(18:1) [sn1]		-0.163303	-0.244 to -0.083	8.1809e-05	0.000991934	-0.161317	-0.246 to -0.084
LPE(18:1) [sn2]		-0.160161	-0.241 to -0.079	0.000127203	0.00145162	-0.160649	-0.247 to -0.074
LPE(18:2) [sn1]		-0.247455	-0.328 to -0.167	2.66506e-09	4.13617e-07	-0.248227	-0.329 to -0.158
LPE(18:2) [sn2]		-0.24615	-0.327 to -0.166	3.71428e-09	4.80381e-07	-0.247614	-0.334 to -0.159
LPE(20:4) [sn1]		-0.166374	-0.248 to -0.084	8.02129e-05	0.000991934	-0.165394	-0.255 to -0.07
LPE(20:4) [sn2]		-0.171686	-0.254 to -0.089	4.94314e-05	0.000710347	-0.174038	-0.26 to -0.076
LPE(22:6) [sn1]		-0.163963	-0.246 to -0.082	9.24587e-05	0.00108709	-0.165173	-0.252 to -0.077
LPE(22:6) [sn2]		-0.137898	-0.22 to -0.056	0.00107908	0.00680788	-0.137195	-0.23 to -0.048
LPE(P-16:0)		-0.031151	-0.089 to 0.027	0.293189	0.444364	-0.0309552	-0.087 to 0.031
LPE(P-18:0)		-0.0776251	-0.143 to -0.012	0.020482	0.0617566	-0.0757519	-0.141 to -0.016
LPE(P-18:1)		-0.00895673	-0.07 to 0.052	0.773065	0.85092	-0.00748379	-0.072 to 0.055
LPE(P-20:0)		-0.114459	-0.184 to -0.045	0.00132838	0.00799087	-0.111218	-0.193 to -0.049
PI (38:5) (b)		-0.148326	-0.232 to -0.065	0.000565184	0.00417698	-0.148049	-0.234 to -0.053
PI(15-MHDA_20:4)\PI(17:0_20:4)		-0.187534	-0.27 to -0.105	1.10322e-05	0.000199093	-0.187398	-0.273 to -0.093
PI(16:0_16:1)		-0.0361019	-0.12 to 0.048	0.400769	0.564345	-0.0375248	-0.135 to 0.055
PI(16:0_20:3) (a)		-0.21258	-0.294 to -0.131	4.77066e-07	1.9243e-05	-0.212321	-0.292 to -0.125
PI(16:0_20:3) (b)		-0.0983557	-0.183 to -0.014	0.0224492	0.0670023	-0.0987204	-0.194 to -0.007
PI(16:0_20:4)		-0.208735	-0.292 to -0.125	1.32492e-06	3.80792e-05	-0.208535	-0.304 to -0.117
PI(16:0/16:0)		-0.0319512	-0.116 to 0.052	0.457836	0.614672	-0.0305148	-0.129 to 0.055
PI(17:0_18:1)		-0.0534638	-0.137 to 0.03	0.207967	0.357041	-0.0537522	-0.131 to 0.032
PI(17:0_18:2)		-0.124742	-0.209 to -0.041	0.00383769	0.0179401	-0.124506	-0.214 to -0.035
PI(18:0_18:1)		-0.157919	-0.242 to -0.074	0.000251784	0.00232601	-0.158632	-0.248 to -0.061
PI(18:0_20:2)		-0.227452	-0.309 to -0.146	6.72244e-08	3.72615e-06	-0.225803	-0.322 to -0.147
PI(18:0_20:3) (a)		-0.174449	-0.255 to -0.094	2.78788e-05	0.000432679	-0.17176	-0.259 to -0.097
PI(18:0_20:3) (b)		-0.0901627	-0.174 to -0.007	0.034894	0.0934492	-0.0906114	-0.172 to 0.002
PI(18:0_20:4)		-0.27974	-0.362 to -0.198	5.65518e-11	2.89476e-08	-0.279326	-0.363 to -0.189
PI(18:0_22:4)		-0.179373	-0.262 to -0.097	2.45635e-05	0.00039711	-0.178873	-0.274 to -0.079
PI(18:0_22:5) (n3)		-0.109892	-0.192 to -0.028	0.00877254	0.0324166	-0.109928	-0.194 to -0.023
PI(18:0_22:5) (n6)		-0.158721	-0.243 to -0.074	0.000244495	0.00228588	-0.156084	-0.254 to -0.077
PI(18:0_22:6)		-0.126603	-0.209 to -0.044	0.0028085	0.0143382	-0.125559	-0.203 to -0.046
PI(18:1_18:2)		-0.0931451	-0.175 to -0.011	0.0259534	0.0743166	-0.0934435	-0.17 to -0.011
PI(20:0_20:4)		-0.142209	-0.224 to -0.06	0.000723144	0.00492246	-0.14301	-0.227 to -0.052
PI(34:0)		-0.0254675	-0.11 to 0.059	0.55414	0.695813	-0.0295672	-0.111 to 0.065
PI(34:1)		-0.0974527	-0.181 to -0.014	0.0226743	0.0674147	-0.102571	-0.179 to -0.007
PI(36:2)		-0.0905511	-0.172 to -0.009	0.0301566	0.0841781	-0.091694	-0.171 to -0.009
PI(37:6)		-0.202767	-0.285 to -0.12	1.85609e-06	4.50874e-05	-0.201608	-0.293 to -0.122
PI(38:5) (a)		-0.21558	-0.298 to -0.133	4.08243e-07	1.82978e-05	-0.213882	-0.313 to -0.132
PI(38:6)		-0.140006	-0.224 to -0.056	0.00120045	0.00727771	-0.137789	-0.223 to -0.047
PI(39:6)		-0.120254	-0.202 to -0.039	0.00398692	0.0181991	-0.118373	-0.201 to -0.045
PIP1(38:4)		-0.0345092	-0.111 to 0.042	0.376437	0.539954	-0.0319593	-0.114 to 0.038
LPI(18:0) [sn1]		-0.0765836	-0.157 to 0.004	0.0640549	0.151084	-0.075757	-0.166 to -0.001
LPI(18:0) [sn2]		-0.0888073	-0.173 to -0.005	0.0389548	0.102471	-0.0911149	-0.176 to 0.004
LPI(18:1) [sn1]		0.0270005	-0.054 to 0.108	0.513287	0.666071	0.0289122	-0.065 to 0.116
LPI(18:1) [sn2]		-0.00825769	-0.092 to 0.075	0.846004	0.901784	-0.00902944	-0.098 to 0.076
LPI(18:2) [sn1]		0.0487589	-0.033 to 0.13	0.241588	0.391383	0.0490191	-0.032 to 0.13
LPI(18:2) [sn2]		0.0261361	-0.056 to 0.109	0.535311	0.685481	0.0278019	-0.07 to 0.103
LPI(20:4) [sn1]		0.0233906	-0.06 to 0.107	0.584335	0.719071	0.0223728	-0.072 to 0.115
LPI(20:4) [sn2]		-0.0174493	-0.101 to 0.067	0.684197	0.791262	-0.0179857	-0.1 to 0.088
PS(36:1)		0.0747851	0.015 to 0.135	0.0151596	0.0494279	0.0754674	0.012 to 0.14
PS(36:2)		0.0819019	0.024 to 0.14	0.00552854	0.022942	0.0819358	0.024 to 0.145
PS(38:3)		0.0199244	-0.041 to 0.08	0.519224	0.670413	0.0213572	-0.043 to 0.079
PS(38:4)		0.0310203	-0.027 to 0.089	0.296345	0.448272	0.0318905	-0.029 to 0.089
PS(38:5)		0.00417622	-0.055 to 0.064	0.890817	0.932893	0.00528345	-0.059 to 0.06
PS(40:5)		0.0471162	-0.02 to 0.114	0.168183	0.303512	0.0478079	-0.021 to 0.113
PS(40:6)		-0.0155161	-0.089 to 0.058	0.681091	0.790025	-0.015531	-0.093 to 0.054
PG(34:1)		-0.119653	-0.202 to -0.037	0.00460112	0.0202401	-0.120145	-0.199 to -0.042
PG(36:1)		-0.0753282	-0.157 to 0.006	0.0714821	0.162713	-0.077437	-0.16 to 0.012
PG(36:2)		-0.0676464	-0.15 to 0.015	0.109425	0.224047	-0.0691604	-0.153 to 0.014
CE(14:0)		-0.0721659	-0.157 to 0.013	0.0979441	0.205975	-0.0724946	-0.154 to 0.03
CE(15:0)		-0.0880922	-0.171 to -0.005	0.0381039	0.101262	-0.0913638	-0.168 to 0
CE(16:0)		-0.144147	-0.227 to -0.061	0.000691929	0.00479408	-0.146295	-0.23 to -0.046
CE(16:1)		-0.083682	-0.167 to 0	0.0496248	0.125029	-0.0837861	-0.165 to 0
CE(16:2)		-0.126446	-0.209 to -0.044	0.00292364	0.0148284	-0.125339	-0.209 to -0.05
CE(17:0)		-0.107931	-0.19 to -0.026	0.0101121	0.0359955	-0.109106	-0.186 to -0.017
CE(17:1)		-0.105172	-0.188 to -0.022	0.0129983	0.0440465	-0.105438	-0.192 to -0.014
CE(18:0)		-0.171341	-0.253 to -0.089	4.89656e-05	0.000710347	-0.172363	-0.253 to -0.085
CE(18:1)		-0.176547	-0.261 to -0.092	5.23305e-05	0.000725152	-0.174569	-0.283 to -0.092
CE(18:2)		-0.123483	-0.208 to -0.039	0.004292	0.019252	-0.125122	-0.218 to -0.043
CE(18:3)		-0.0652615	-0.148 to 0.018	0.123952	0.246002	-0.0652924	-0.151 to 0.016
CE(20:0)		-0.136376	-0.221 to -0.052	0.00158086	0.009087	-0.136738	-0.218 to -0.05
CE(20:1)		-0.1577	-0.242 to -0.073	0.000277308	0.00244535	-0.157449	-0.236 to -0.08
CE(20:2)		-0.200889	-0.285 to -0.117	3.58644e-06	7.73076e-05	-0.200936	-0.291 to -0.102
CE(20:3)		-0.0523723	-0.137 to 0.032	0.223562	0.376018	-0.0521421	-0.148 to 0.036
CE(20:4)		-0.111119	-0.194 to -0.029	0.00845495	0.031713	-0.113028	-0.185 to -0.033
CE(20:5)		-0.00125111	-0.084 to 0.081	0.976324	0.985211	-0.00289807	-0.08 to 0.082
CE(22:0)		-0.146498	-0.231 to -0.062	0.000737286	0.00497508	-0.145522	-0.238 to -0.069
CE(22:1)		-0.110014	-0.194 to -0.026	0.0103814	0.0364523	-0.108022	-0.192 to -0.029
CE(22:4)		-0.0869808	-0.171 to -0.003	0.0418289	0.109493	-0.0865085	-0.161 to -0.011
CE(22:5) (n3)		-0.123889	-0.206 to -0.042	0.00318855	0.015861	-0.125194	-0.208 to -0.042
CE(22:5) (n6)		-0.120597	-0.203 to -0.038	0.00449243	0.0199207	-0.122709	-0.206 to -0.031
CE(22:6)		-0.111775	-0.193 to -0.03	0.00756524	0.0289194	-0.115014	-0.191 to -0.032
CE(24:0)		-0.15941	-0.244 to -0.075	0.000234238	0.00224406	-0.161073	-0.242 to -0.076
CE(24:1)		-0.135455	-0.219 to -0.051	0.00166955	0.00938822	-0.133558	-0.221 to -0.051
CE(24:4)		-0.230722	-0.313 to -0.148	6.27511e-08	3.72615e-06	-0.230241	-0.307 to -0.143
CE(24:5)		-0.206576	-0.289 to -0.124	1.2543e-06	3.74361e-05	-0.204875	-0.284 to -0.122
CE(24:6)		-0.104102	-0.187 to -0.021	0.0142815	0.0471592	-0.105266	-0.194 to -0.026
COH		-0.0528548	-0.138 to 0.032	0.221712	0.375651	-0.0562496	-0.14 to 0.038
DE(16:0)		-0.0280221	-0.113 to 0.057	0.517814	0.669706	-0.0282446	-0.108 to 0.057
DE(18:1)		-0.128354	-0.214 to -0.043	0.00334411	0.0163952	-0.129263	-0.21 to -0.048
DE(18:2)		-0.143278	-0.225 to -0.061	0.000671963	0.00469769	-0.143248	-0.22 to -0.066
DE(20:4)		-0.0963163	-0.177 to -0.015	0.0203445	0.0616694	-0.0977634	-0.177 to -0.009
DE(20:5)		-0.021463	-0.104 to 0.061	0.60963	0.734697	-0.0221134	-0.105 to 0.059
DE(22:6)		-0.129443	-0.211 to -0.048	0.00201298	0.0108477	-0.129381	-0.216 to -0.054
FA(14:0)		-0.052087	-0.129 to 0.025	0.187768	0.331155	-0.051497	-0.124 to 0.025
FA(15:0)		-0.0475855	-0.129 to 0.034	0.254899	0.407	-0.04569	-0.125 to 0.035
FA(16:0)		-0.0506804	-0.124 to 0.022	0.173294	0.309897	-0.0508481	-0.117 to 0.029
FA(16:1)		-0.0377302	-0.117 to 0.042	0.35342	0.513585	-0.0397462	-0.123 to 0.04
FA(16:2)		-0.0255495	-0.108 to 0.057	0.546119	0.691874	-0.0278412	-0.107 to 0.056
FA(17:0)		-0.0143429	-0.097 to 0.069	0.735388	0.822625	-0.0132261	-0.091 to 0.066
FA(17:1)		-0.0226872	-0.104 to 0.059	0.585635	0.719071	-0.0237496	-0.106 to 0.06
FA(18:0)		-0.0785711	-0.162 to 0.005	0.0651621	0.15323	-0.0796853	-0.156 to 0.009
FA(18:1)		-0.0436147	-0.118 to 0.031	0.252494	0.404824	-0.0415078	-0.122 to 0.031
FA(18:2)		-0.0616406	-0.13 to 0.006	0.0760143	0.169314	-0.0622663	-0.13 to 0.012
FA(18:3)		-0.0359439	-0.105 to 0.033	0.310392	0.464093	-0.0345751	-0.111 to 0.036
FA(20:2)		-0.0344795	-0.114 to 0.045	0.3956	0.558592	-0.0352246	-0.117 to 0.053
FA(20:3)		-0.0470769	-0.129 to 0.035	0.260953	0.412871	-0.0456921	-0.139 to 0.042
FA(20:4)		-0.0628278	-0.145 to 0.019	0.134146	0.262871	-0.0644189	-0.146 to 0.034
FA(20:5)		-0.0151638	-0.099 to 0.069	0.723494	0.816033	-0.0116559	-0.119 to 0.067
FA(22:4)		-0.0461782	-0.128 to 0.035	0.26752	0.417393	-0.0443937	-0.138 to 0.043
FA(22:5)		-0.060167	-0.141 to 0.021	0.145237	0.276335	-0.0615761	-0.139 to 0.029
FA(22:6)		-0.114799	-0.194 to -0.036	0.00463564	0.0202401	-0.113402	-0.192 to -0.036
AC(12:0)		-0.0149165	-0.099 to 0.069	0.726862	0.817456	-0.0154197	-0.105 to 0.071
AC(13:0)		-0.0142458	-0.098 to 0.07	0.739108	0.825248	-0.0150931	-0.1 to 0.06
AC(14:0)		-0.0466715	-0.123 to 0.03	0.231399	0.382054	-0.0473865	-0.132 to 0.026
AC(14:1)		0.0424361	-0.041 to 0.126	0.31784	0.470695	0.0430124	-0.041 to 0.122
AC(14:2)		0.018048	-0.066 to 0.102	0.674028	0.783002	0.0176244	-0.061 to 0.109
AC(15:0) (a)		-0.0557616	-0.138 to 0.026	0.184415	0.326901	-0.0540801	-0.138 to 0.029
AC(15:0) (b)		-0.0327589	-0.111 to 0.045	0.410427	0.573858	-0.0331626	-0.111 to 0.048
AC(16:0)		-0.0497628	-0.118 to 0.018	0.151767	0.282425	-0.0486083	-0.122 to 0.022
AC(16:1)		-0.0202276	-0.096 to 0.056	0.602682	0.734193	-0.0193727	-0.102 to 0.054
AC(17:0) (a)		-0.0747767	-0.155 to 0.005	0.0677721	0.157726	-0.0742905	-0.166 to 0.015
AC(17:0) (b)		-0.0862277	-0.164 to -0.008	0.0311836	0.0864232	-0.0855895	-0.161 to -0.006
AC(18:0)		-0.117322	-0.192 to -0.043	0.0021647	0.0115849	-0.116359	-0.192 to -0.039
AC(18:1)		-0.0142352	-0.065 to 0.037	0.585075	0.719071	-0.0140982	-0.073 to 0.041
AC(18:2)		-0.0414408	-0.088 to 0.005	0.0839188	0.182924	-0.0398112	-0.087 to 0.007
DG(14:0_16:0)		-0.0243483	-0.109 to 0.06	0.571925	0.712382	-0.0236016	-0.113 to 0.057
DG(14:0_18:2)		-0.0283211	-0.112 to 0.056	0.509039	0.666071	-0.0282801	-0.113 to 0.061
DG(16:0_16:0)		0.0172634	-0.067 to 0.101	0.687295	0.79266	0.0174031	-0.067 to 0.093
DG(16:0_16:1)		-0.0174122	-0.102 to 0.067	0.687449	0.79266	-0.0187781	-0.101 to 0.071
DG(16:0_18:1)		0.0372754	-0.047 to 0.121	0.383845	0.546539	0.0362794	-0.049 to 0.12
DG(16:0_18:2)		0.0315777	-0.052 to 0.115	0.459277	0.615542	0.0328975	-0.054 to 0.106
DG(16:0_20:4)		0.0407405	-0.04 to 0.121	0.322378	0.473798	0.0441823	-0.062 to 0.124
DG(16:0_22:5)		0.00242243	-0.079 to 0.084	0.953762	0.968743	0.00184444	-0.079 to 0.085
DG(16:0_22:6)		0.00530381	-0.077 to 0.087	0.899191	0.935351	0.0049598	-0.077 to 0.083
DG(16:1_18:1)		-0.0150372	-0.1 to 0.07	0.728022	0.817577	-0.0147881	-0.096 to 0.067
DG(18:0_18:1)		0.0261316	-0.059 to 0.111	0.547436	0.691874	0.0272712	-0.064 to 0.111
DG(18:0_18:2)		0.0369031	-0.048 to 0.121	0.391862	0.555914	0.0373865	-0.043 to 0.116
DG(18:0_20:4)		0.0563386	-0.014 to 0.126	0.116069	0.235784	0.0560597	-0.015 to 0.13
DG(18:0_22:6)		0.0552081	-0.029 to 0.139	0.199081	0.346383	0.0542076	-0.022 to 0.135
DG(18:1_18:1)		0.027752	-0.058 to 0.113	0.524261	0.674671	0.0264329	-0.054 to 0.111
DG(18:1_18:2)		0.0120525	-0.072 to 0.096	0.779207	0.854046	0.0121532	-0.068 to 0.09
DG(18:1_18:3)		0.00611081	-0.077 to 0.09	0.885849	0.930201	0.00631283	-0.076 to 0.081
DG(18:1_20:3)		0.0181187	-0.066 to 0.102	0.672204	0.782055	0.0182733	-0.07 to 0.112
DG(18:1_20:4)		0.0686138	-0.015 to 0.152	0.106467	0.219729	0.0687649	-0.014 to 0.161
DG(18:1_20:5)		0.045166	-0.038 to 0.128	0.287655	0.43941	0.0456729	-0.042 to 0.123
DG(18:1_22:5)		0.0191865	-0.064 to 0.102	0.651802	0.769334	0.022089	-0.066 to 0.109
DG(18:1_22:6)		0.0237458	-0.06 to 0.107	0.577556	0.714806	0.0257311	-0.055 to 0.107
DG(18:2_18:2)		-0.00341816	-0.087 to 0.081	0.936442	0.956156	-0.00415335	-0.081 to 0.081
DG(18:2_20:4)		0.050054	-0.032 to 0.133	0.234972	0.385493	0.0489158	-0.029 to 0.138
DG(18:2_22:6)		0.0014181	-0.083 to 0.085	0.973609	0.983751	0.00224439	-0.085 to 0.077
TG(48:0) [SIM]		-0.029763	-0.113 to 0.053	0.483829	0.641796	-0.0284093	-0.112 to 0.047
TG(48:1) [SIM]		-0.0186174	-0.101 to 0.064	0.659305	0.77284	-0.015965	-0.105 to 0.067
TG(48:2) [SIM]		0.0011625	-0.082 to 0.084	0.97808	0.985701	0.00138264	-0.09 to 0.079
TG(48:3) [SIM]		-0.00881631	-0.091 to 0.073	0.83375	0.894869	-0.00695448	-0.098 to 0.071
TG(49:1) [SIM]		-0.0151589	-0.098 to 0.068	0.720318	0.815461	-0.0151562	-0.106 to 0.065
TG(50:0) [SIM]		0.000443769	-0.082 to 0.083	0.991557	0.996695	0.000902552	-0.079 to 0.085
TG(50:1) [SIM]		0.0221186	-0.06 to 0.104	0.597681	0.729246	0.0211705	-0.063 to 0.109
TG(50:2) [SIM]		-0.011509	-0.095 to 0.072	0.786021	0.857879	-0.010059	-0.095 to 0.074
TG(50:3) [SIM]		-0.0139096	-0.097 to 0.069	0.742683	0.826861	-0.0119818	-0.099 to 0.069
TG(50:4) [SIM]		-0.00793733	-0.09 to 0.075	0.850551	0.905388	-0.00717291	-0.088 to 0.072
TG(51:0) [SIM]		0.0332218	-0.052 to 0.119	0.4461	0.60397	0.0333584	-0.047 to 0.113
TG(51:1) [SIM]		0.0106301	-0.071 to 0.093	0.799505	0.867715	0.0106837	-0.079 to 0.085
TG(51:2) [SIM]		-0.0014739	-0.084 to 0.081	0.971919	0.983323	-0.001846	-0.075 to 0.083
TG(52:1) [SIM]		0.0248851	-0.057 to 0.106	0.549404	0.692742	0.0255352	-0.059 to 0.101
TG(52:2) [SIM]		0.0743439	-0.009 to 0.157	0.0801232	0.176635	0.0710023	-0.001 to 0.168
TG(52:3) [SIM]		0.0725967	-0.011 to 0.156	0.0893519	0.191655	0.0728921	-0.01 to 0.157
TG(52:4) [SIM]		0.0450072	-0.039 to 0.129	0.29185	0.4432	0.0440349	-0.039 to 0.133
TG(52:5) [SIM]		0.0114802	-0.071 to 0.094	0.785399	0.857879	0.0127163	-0.074 to 0.09
TG(53:2) [SIM]		0.0324665	-0.05 to 0.115	0.438745	0.598359	0.0327106	-0.044 to 0.118
TG(54:0) [SIM]		-0.0218086	-0.105 to 0.061	0.606561	0.734697	-0.0209684	-0.095 to 0.062
TG(54:1) [SIM]		0.00687788	-0.075 to 0.089	0.869878	0.920908	0.00333462	-0.068 to 0.094
TG(54:2) [SIM]		0.0553502	-0.027 to 0.138	0.190855	0.335835	0.0550004	-0.032 to 0.137
TG(54:3) [SIM]		0.0714586	-0.011 to 0.154	0.0894059	0.191655	0.075763	-0.022 to 0.15
TG(54:4) [SIM]		0.0589839	-0.023 to 0.141	0.158862	0.290748	0.0605283	-0.028 to 0.134
TG(54:5) [SIM]		0.048103	-0.034 to 0.131	0.253666	0.405866	0.0476228	-0.028 to 0.136
TG(54:6) [SIM]		0.0504658	-0.033 to 0.134	0.234936	0.385493	0.05299	-0.032 to 0.129
TG(54:7) [SIM]		0.0380308	-0.045 to 0.121	0.367679	0.530332	0.0389475	-0.037 to 0.115
TG(56:6) [SIM]		0.121854	0.039 to 0.204	0.00389159	0.0180486	0.121977	0.041 to 0.205
TG(56:7) [SIM]		0.0910888	0.009 to 0.173	0.0293761	0.0825936	0.0890531	0.011 to 0.183
TG(56:8) [SIM]		0.0834706	0.001 to 0.166	0.0470765	0.120618	0.084307	-0.005 to 0.168
TG(56:9) [SIM]		0.0477933	-0.036 to 0.132	0.266471	0.417393	0.0465922	-0.039 to 0.137
TG(58:10) [SIM]		0.0655091	-0.017 to 0.148	0.121905	0.243811	0.0663466	-0.016 to 0.149
TG(58:8) [SIM]		0.0747284	-0.008 to 0.157	0.0771012	0.170944	0.0762227	-0.015 to 0.151
TG(58:9) [SIM]		0.0739077	-0.01 to 0.158	0.0841629	0.182942	0.0744625	-0.01 to 0.161
TG(48:0) [NL-16:0]		0.00591593	-0.077 to 0.089	0.889133	0.932388	0.00465928	-0.077 to 0.098
TG(48:0) [NL-18:0]		-0.0562142	-0.139 to 0.027	0.184514	0.326901	-0.0576999	-0.134 to 0.024
TG(48:1) [NL-16:1]		-0.00202935	-0.085 to 0.081	0.961615	0.975442	-0.0013398	-0.09 to 0.077
TG(48:1) [NL-18:1]		-0.0256256	-0.108 to 0.057	0.544491	0.69153	-0.022951	-0.11 to 0.051
TG(48:2) [NL-14:0]		-0.0253787	-0.108 to 0.057	0.546956	0.691874	-0.0269715	-0.106 to 0.066
TG(48:2) [NL-14:1]		0.0232582	-0.059 to 0.106	0.58131	0.718307	0.0227404	-0.058 to 0.098
TG(48:2) [NL-16:1]		-0.00865599	-0.092 to 0.074	0.837991	0.895703	-0.00827992	-0.099 to 0.085
TG(48:2) [NL-18:2]		-0.0189793	-0.102 to 0.064	0.652348	0.769334	-0.0208975	-0.102 to 0.06
TG(48:3) [NL-14:0]		-0.0342175	-0.117 to 0.048	0.417795	0.58102	-0.0340042	-0.112 to 0.049
TG(48:3) [NL-16:1]		-0.0115627	-0.094 to 0.071	0.784553	0.857879	-0.0120737	-0.099 to 0.078
TG(48:3) [NL-18:3]		-0.0194192	-0.102 to 0.064	0.646752	0.765061	-0.0180397	-0.113 to 0.052
TG(49:1) [NL-16:1]		0.00681812	-0.078 to 0.092	0.87487	0.924198	0.00365719	-0.071 to 0.1
TG(49:1) [NL-17:1]		-0.0065547	-0.089 to 0.076	0.876559	0.924198	-0.00636599	-0.094 to 0.077
TG(50:0) [NL-18:0]		0.0152127	-0.067 to 0.097	0.716765	0.814873	0.0144151	-0.069 to 0.099
TG(50:1) [NL-14:0]		-0.0331173	-0.117 to 0.05	0.436858	0.598359	-0.0327933	-0.112 to 0.039
TG(50:1) [NL-16:0]		0.0392607	-0.043 to 0.121	0.349252	0.509683	0.0382996	-0.044 to 0.128
TG(50:1) [NL-18:1]		0.00506715	-0.077 to 0.088	0.904243	0.937408	0.00620362	-0.089 to 0.092
TG(50:2) [NL-14:0]		-0.0283059	-0.111 to 0.054	0.502183	0.658267	-0.0285062	-0.115 to 0.061
TG(50:2) [NL-16:1]		-0.00269465	-0.085 to 0.08	0.948879	0.965046	-0.00497093	-0.09 to 0.08
TG(50:2) [NL-18:1]		-0.0303547	-0.114 to 0.053	0.477464	0.634439	-0.0302219	-0.114 to 0.054
TG(50:2) [NL-18:2]		0.0354199	-0.047 to 0.118	0.401441	0.564345	0.0369409	-0.046 to 0.121
TG(50:3) [NL-14:0]		0.00295452	-0.079 to 0.085	0.943805	0.962408	0.0026879	-0.081 to 0.091
TG(50:3) [NL-14:1]		0.0557853	-0.028 to 0.139	0.191487	0.336185	0.0554097	-0.03 to 0.147
TG(50:3) [NL-16:1]		-0.00559052	-0.088 to 0.077	0.894552	0.933256	-0.00553619	-0.091 to 0.079
TG(50:3) [NL-18:2]		0.0105291	-0.072 to 0.093	0.801664	0.868103	0.00996825	-0.067 to 0.093
TG(50:3) [NL-18:3]		0.0248442	-0.058 to 0.108	0.558759	0.70048	0.0234418	-0.053 to 0.11
TG(50:4) [NL-14:0]		-0.00768811	-0.09 to 0.074	0.854594	0.908445	-0.00660145	-0.086 to 0.07
TG(50:4) [NL-18:3]		-0.00879261	-0.092 to 0.074	0.83562	0.895637	-0.00769826	-0.09 to 0.071
TG(50:4) [NL-20:4]		0.00474261	-0.077 to 0.087	0.909997	0.939039	0.00638266	-0.082 to 0.089
TG(51:0) [NL-16:0]		-0.00425227	-0.087 to 0.079	0.919862	0.945447	-0.0024136	-0.088 to 0.076
TG(51:1) [NL-17:0]		0.0138643	-0.068 to 0.096	0.740395	0.825497	0.0140146	-0.066 to 0.094
TG(51:2) [NL-15:0]		0.00742538	-0.076 to 0.09	0.860965	0.913965	0.0081632	-0.078 to 0.086
TG(51:2) [NL-17:0]		0.0153732	-0.067 to 0.097	0.713539	0.814873	0.0126127	-0.071 to 0.096
TG(51:2) [NL-17:1]		0.0151984	-0.067 to 0.097	0.716637	0.814873	0.0160564	-0.069 to 0.098
TG(52:1) [NL-18:0]		0.0195581	-0.062 to 0.101	0.636875	0.757999	0.0190164	-0.063 to 0.1
TG(52:1) [NL-18:1]		0.0215424	-0.06 to 0.103	0.605195	0.734697	0.0229784	-0.058 to 0.106
TG(52:2) [NL-16:0]		0.0832191	0 to 0.166	0.0504335	0.126442	0.0815112	-0.002 to 0.172
TG(52:2) [NL-18:2]		-0.00551629	-0.087 to 0.076	0.894771	0.933256	-0.00430962	-0.083 to 0.071
TG(52:3) [NL-16:1]		-0.0318159	-0.117 to 0.053	0.463051	0.617516	-0.0291485	-0.125 to 0.054
TG(52:3) [NL-18:2]		0.0334652	-0.05 to 0.117	0.433129	0.596995	0.032455	-0.06 to 0.113
TG(52:4) [NL-16:1]		-0.0156187	-0.099 to 0.068	0.715141	0.814873	-0.0168133	-0.101 to 0.069
TG(52:4) [NL-18:2]		0.0383502	-0.044 to 0.121	0.363522	0.526293	0.0376121	-0.037 to 0.12
TG(52:4) [NL-18:3]		0.0654135	-0.018 to 0.149	0.125825	0.248449	0.0674095	-0.017 to 0.151
TG(52:5) [NL-18:3]		-0.00401875	-0.087 to 0.079	0.924488	0.947691	-0.00420445	-0.086 to 0.077
TG(52:5) [NL-20:4]		0.0407181	-0.041 to 0.122	0.327134	0.479879	0.0401588	-0.053 to 0.128
TG(52:5) [NL-20:5]		0.0478431	-0.033 to 0.129	0.245924	0.395928	0.0484284	-0.041 to 0.129
TG(53:2) [NL-17:1]		0.0229936	-0.059 to 0.105	0.582893	0.719071	0.0246121	-0.057 to 0.1
TG(53:2) [NL-18:1]		0.0320381	-0.05 to 0.114	0.444522	0.603057	0.0317459	-0.055 to 0.111
TG(54:0) [NL-18:0]		-0.0133221	-0.096 to 0.069	0.751713	0.83452	-0.0145341	-0.087 to 0.068
TG(54:1) [NL-18:1]		-0.00566594	-0.088 to 0.077	0.892909	0.933256	-0.00726544	-0.089 to 0.065
TG(54:2) [NL-18:0]		0.0593824	-0.024 to 0.143	0.162237	0.294149	0.0612188	-0.024 to 0.148
TG(54:2) [NL-20:1]		0.0581856	-0.024 to 0.141	0.167962	0.303512	0.0611374	-0.028 to 0.133
TG(54:3) [NL-18:1]		0.0605258	-0.021 to 0.142	0.146913	0.27778	0.0623336	-0.023 to 0.143
TG(54:3) [NL-18:2]		0.0708092	-0.012 to 0.154	0.0944131	0.199088	0.0716205	-0.014 to 0.156
TG(54:4) [NL-18:2]		0.00861661	-0.074 to 0.091	0.837679	0.895703	0.0120334	-0.074 to 0.088
TG(54:4) [NL-20:3]		0.0826869	0.001 to 0.165	0.0486679	0.123419	0.0821759	-0.002 to 0.176
TG(54:5) [NL-18:3]		0.00841647	-0.075 to 0.092	0.843139	0.899967	0.00929562	-0.08 to 0.09
TG(54:5) [NL-20:4]		0.14308	0.062 to 0.224	0.000611008	0.00443124	0.142492	0.062 to 0.229
TG(54:6) [NL-18:3]		0.00506989	-0.077 to 0.087	0.903972	0.937408	0.00485775	-0.077 to 0.087
TG(54:6) [NL-20:4]		0.14598	0.064 to 0.228	0.000530752	0.00403788	0.147182	0.063 to 0.226
TG(54:6) [NL-20:5]		0.0742455	-0.007 to 0.156	0.0744792	0.16704	0.0745913	-0.01 to 0.148
TG(54:6) [NL-22:6]		0.0333511	-0.047 to 0.114	0.415808	0.579758	0.0337527	-0.055 to 0.111
TG(54:7) [NL-20:5]		0.06343	-0.019 to 0.145	0.130157	0.256351	0.0619376	-0.014 to 0.153
TG(54:7) [NL-22:6]		0.0155375	-0.066 to 0.097	0.708094	0.812842	0.0148924	-0.067 to 0.108
TG(56:6) [NL-20:4]		0.181733	0.099 to 0.265	2.12363e-05	0.000358248	0.18001	0.102 to 0.262
TG(56:6) [NL-22:5](a)		0.0738393	-0.007 to 0.155	0.0739669	0.166372	0.0737425	-0.014 to 0.153
TG(56:6) [NL-22:5](b)		0.074541	-0.006 to 0.155	0.0711336	0.162713	0.0745008	-0.008 to 0.151
TG(56:7) [NL-20:4]		0.121351	0.037 to 0.206	0.00491852	0.0211155	0.121683	0.037 to 0.211
TG(56:7) [NL-20:5]		0.0724511	-0.011 to 0.156	0.0887399	0.191655	0.0731763	-0.011 to 0.151
TG(56:7) [NL-22:5](a)		0.0786373	-0.002 to 0.16	0.0575435	0.138247	0.0781063	-0.002 to 0.161
TG(56:7) [NL-22:5](b)		0.078384	-0.003 to 0.159	0.0583433	0.139306	0.0803745	-0.005 to 0.166
TG(56:7) [NL-22:6]		0.0665067	-0.014 to 0.147	0.104737	0.216737	0.0686585	-0.027 to 0.138
TG(56:8) [NL-20:4]		0.0842266	0 to 0.169	0.0516405	0.128029	0.0840322	-0.006 to 0.171
TG(56:8) [NL-20:5]		0.0544865	-0.03 to 0.139	0.204659	0.354498	0.0552846	-0.032 to 0.138
TG(56:8) [NL-22:6]		0.0657263	-0.016 to 0.147	0.113493	0.231764	0.0662285	-0.021 to 0.146
TG(56:9) [NL-22:6]		0.0213123	-0.061 to 0.104	0.612638	0.734697	0.0191248	-0.062 to 0.097
TG(58:10) [NL-22:6]		0.0267664	-0.057 to 0.11	0.529404	0.679508	0.0286355	-0.063 to 0.106
TG(58:8) [NL-22:6]		0.0543464	-0.029 to 0.138	0.202289	0.351178	0.0535464	-0.027 to 0.138
TG(58:9) [NL-22:6]		0.0357056	-0.048 to 0.12	0.404326	0.566348	0.0362016	-0.047 to 0.112
TG(O-50:1) [SIM]		0.0273257	-0.054 to 0.109	0.510566	0.666071	0.0268305	-0.054 to 0.114
TG(O-50:2) [SIM]		0.0491993	-0.034 to 0.133	0.248839	0.399791	0.0502305	-0.046 to 0.146
TG(O-50:3) [SIM]		-0.0190037	-0.105 to 0.067	0.663711	0.77664	-0.0190989	-0.104 to 0.063
TG(O-52:0) [SIM]		-0.0124185	-0.096 to 0.071	0.769687	0.848405	-0.0140193	-0.081 to 0.079
TG(O-52:1) [SIM]		-0.0116408	-0.092 to 0.069	0.777667	0.853564	-0.0114829	-0.087 to 0.069
TG(O-52:2) [SIM]		0.00476034	-0.076 to 0.086	0.908065	0.938293	0.00265589	-0.075 to 0.091
TG(O-54:2) [SIM]		-0.0140924	-0.095 to 0.066	0.731724	0.820546	-0.0150748	-0.09 to 0.07
TG(O-54:3) [SIM]		0.0329372	-0.048 to 0.114	0.425853	0.58801	0.032088	-0.048 to 0.114
TG(O-54:4) [SIM]		0.0321948	-0.049 to 0.113	0.437213	0.598359	0.0335811	-0.061 to 0.113
TG(O-50:1) [NL-15:0]		0.0140726	-0.068 to 0.096	0.735698	0.822625	0.0160286	-0.081 to 0.096
TG(O-50:1) [NL-16:0]		0.0132899	-0.068 to 0.094	0.748346	0.831972	0.0155376	-0.067 to 0.104
TG(O-50:1) [NL-17:1]		0.0234034	-0.058 to 0.105	0.574689	0.713534	0.0243085	-0.065 to 0.118
TG(O-50:1) [NL-18:1]		0.0147006	-0.067 to 0.096	0.722904	0.816033	0.0160975	-0.074 to 0.094
TG(O-50:2) [NL-16:1]		0.053053	-0.031 to 0.137	0.216062	0.367661	0.0521311	-0.036 to 0.147
TG(O-50:2) [NL-18:1]		-0.0026856	-0.084 to 0.079	0.948681	0.965046	-0.00505172	-0.09 to 0.081
TG(O-50:2) [NL-18:2]		0.012906	-0.071 to 0.097	0.762796	0.844408	0.0145372	-0.081 to 0.101
TG(O-50:3) [NL-18:2]		-0.0587405	-0.143 to 0.026	0.172409	0.309698	-0.0598312	-0.141 to 0.024
TG(O-52:0) [NL-16:0]		-0.0269111	-0.108 to 0.054	0.515003	0.667183	-0.0254526	-0.104 to 0.058
TG(O-52:1) [NL-16:0]		-0.0168784	-0.098 to 0.064	0.682726	0.79074	-0.017527	-0.101 to 0.064
TG(O-52:1) [NL-18:1]		-0.0144437	-0.095 to 0.066	0.725746	0.817386	-0.0157691	-0.091 to 0.083
TG(O-52:2) [NL-16:0]		-0.0190267	-0.1 to 0.062	0.643836	0.763132	-0.0175806	-0.106 to 0.072
TG(O-52:2) [NL-17:1]		-0.00486158	-0.086 to 0.076	0.906	0.937408	-0.00492838	-0.095 to 0.08
TG(O-52:2) [NL-18:1]		-0.000140016	-0.081 to 0.081	0.997288	0.999781	0.00181374	-0.09 to 0.087
TG(O-54:2) [NL-17:1]		-0.0148394	-0.095 to 0.066	0.718264	0.814873	-0.0164631	-0.097 to 0.077
TG(O-54:2) [NL-18:1]		-0.0204807	-0.101 to 0.06	0.618664	0.73859	-0.0209621	-0.104 to 0.065
TG(O-54:3) [NL-17:1]		0.009909	-0.072 to 0.092	0.812677	0.87467	0.00719857	-0.083 to 0.105
TG(O-54:3) [NL-18:1]		-0.00979466	-0.091 to 0.071	0.812375	0.87467	-0.0109632	-0.096 to 0.08
TG(O-54:4) [NL-17:1]		0.0289379	-0.054 to 0.112	0.494958	0.65321	0.03008	-0.059 to 0.117
TG(O-54:4) [NL-18:2]		-0.0215696	-0.104 to 0.061	0.609198	0.734697	-0.0214351	-0.105 to 0.066
Ubiquinone		0.0220194	-0.063 to 0.107	0.611829	0.734697	0.0242161	-0.074 to 0.111
CE(18:2) [+OH]		-0.101864	-0.186 to -0.018	0.0180426	0.057147	-0.102097	-0.179 to -0.019
CE(20:4) [+OH]		-0.062709	-0.147 to 0.022	0.145293	0.276335	-0.0606171	-0.153 to 0.018
CE(22:6) [+OH]		-0.158172	-0.242 to -0.075	0.000224247	0.00220273	-0.158103	-0.243 to -0.074
LPC(18:2) [+OH]		-0.0276095	-0.075 to 0.02	0.256151	0.408159	-0.0260892	-0.074 to 0.022
LPC(20:4) [+OH]		-0.025957	-0.07 to 0.018	0.245335	0.395801	-0.0238386	-0.066 to 0.02
LPC(22:6) [+OH]		-0.0504166	-0.09 to -0.011	0.0127246	0.0433084	-0.0499464	-0.089 to -0.011
PC(34:2) [+OH]		-0.0606104	-0.145 to 0.024	0.158549	0.290748	-0.060749	-0.136 to 0.018
PC(36:4) [+OH]		0.0997255	0.018 to 0.182	0.0175658	0.0560403	0.0982779	0.008 to 0.197
PC(38:6) [+OH]		-0.0900243	-0.172 to -0.008	0.0324796	0.0890605	-0.0926229	-0.167 to -0.011
Regression coefficients (β) are estimated difference in log lipidomic measure at 6 months of age (SD units) per 1 SD increase in log hsCRP at 6 months.
Models are adjusted for infant sex, birth weight z-score, gestational age, exact age at 6-month time point, maternal household income, exposure to any breastfeeding, exposure to any maternal smoking during pregnancy, and 6-month blood sample processing time.
Adjusted p-values are based on the Benjamini-Hochberg method of adjustment for multiple comparisons.
Bootstrap estimates are calculated as the mean coefficent across 1000 iterations of bootstrap resampling.
Bootstrap 95% confidence intervals are bias-corrected accelerated percentile confidence intervals.
