# Supplementary material for: Early life infection and proinflammatory, atherogenic metabolomic and lipidomic profiles in infancy: a population-based cohort study
Source: eLife. 2022 May 10;11:e75170. doi: 10.7554/eLife.75170 (PMC9090335; doi:10.7554/eLife.75170)
Supplement: Figure 6—source data 3. [file elife-75170-fig6-data3.xlsx]

## Sheet: Figure 6 - Source Data 3
Figure 6 - Source Data 3. Summary of regression models for difference in 12-month LC/MS lipidomic measures (adjusted for corresponding 6-month measure) per SD increase in 12-month log hsCRP (adjusted for 6-month hsCRP).
		12-month hsCRP (adjusted for 6-month hsCRP)
Measure	Class Name	Estimate (β)	95% Confidence Interval	P-value	Adj. P-value	Bootstrap Estimate	Bootstrap 95% Confidence Interval
Total Sph	Sphingosines	0.0186149	-0.049 to 0.086	0.586977	0.650094	0.0195259	-0.057 to 0.087
Total S1P	Sphingosine phosphates	-0.0262222	-0.092 to 0.04	0.436187	0.531603	-0.0235105	-0.1 to 0.036
Total dhCer	Dihydro-ceramides	-0.0668849	-0.149 to 0.016	0.113037	0.163276	-0.0671749	-0.149 to 0.017
Total Cer	Ceramides	-0.023639	-0.114 to 0.066	0.607051	0.650094	-0.025616	-0.112 to 0.073
Total C1P	Ceramide-1-phosphate	-0.148399	-0.238 to -0.059	0.00129308	0.00504302	-0.146255	-0.247 to -0.061
Total MHC	Hexosyl-ceramides	0.10678	0.027 to 0.187	0.00935362	0.0222143	0.105385	0.024 to 0.19
Total DHC	Di-hexosyl-ceramides	0.165071	0.073 to 0.257	0.000462729	0.00200516	0.166649	0.071 to 0.257
Total THC	Tri-hexosyl-ceramides	-0.115216	-0.202 to -0.028	0.00968316	0.0222143	-0.115482	-0.209 to -0.036
Total GM3	GM3-gangliosides	0.107486	0.02 to 0.195	0.0168017	0.0364038	0.103683	0.022 to 0.211
Total GM1	GM1-gangliosides	0.0309289	-0.059 to 0.121	0.500085	0.573627	0.0312012	-0.052 to 0.135
Total Sulfatide	Sulfatides	-0.214253	-0.298 to -0.13	7.92303e-07	6.17996e-06	-0.216454	-0.295 to -0.135
Total SM	Sphingomyelins	0.0196538	-0.073 to 0.112	0.678162	0.696009	0.018933	-0.079 to 0.12
Total PA	Phosphatidic acid	-0.0807509	-0.136 to -0.026	0.00436516	0.0121601	-0.0814891	-0.152 to -0.026
Total PC	Phosphatidylcholines	-0.145167	-0.238 to -0.053	0.00226715	0.00803808	-0.148428	-0.224 to -0.054
Total PC_O	Alkyl phosphatidylcholines	-0.0775515	-0.166 to 0.011	0.0871614	0.141637	-0.0775957	-0.169 to 0.011
Total PC_P	Alkenyl phosphatidylcholines	-0.198077	-0.278 to -0.118	1.5139e-06	9.84035e-06	-0.197043	-0.28 to -0.118
Total LPC	Lysophosphatidylcholines	-0.184265	-0.251 to -0.118	9.76228e-08	1.2691e-06	-0.183556	-0.25 to -0.119
Total LPC_O	Lysoalkyl phosphatidylcholines	-0.0632231	-0.121 to -0.005	0.0326528	0.060641	-0.0623878	-0.126 to -0.005
Total LPC_P	Lysoalkenyl phosphatidylcholines	-0.168067	-0.226 to -0.11	2.91779e-08	5.68969e-07	-0.167462	-0.224 to -0.106
Total PE	Phosphatidylethanolamines	-0.0649194	-0.154 to 0.024	0.152521	0.21244	-0.0671305	-0.147 to 0.027
Total PE_O	Alkylphosphatidylethanolamines	-0.250798	-0.336 to -0.166	1.27847e-08	4.98605e-07	-0.250252	-0.339 to -0.172
Total PE_P	Alkenylphosphatidylethanolamines	-0.156711	-0.242 to -0.071	0.000359232	0.00175126	-0.155667	-0.239 to -0.081
Total LPE	Lysophosphatidylethanolamines	-0.218848	-0.303 to -0.135	4.44736e-07	4.33618e-06	-0.218808	-0.292 to -0.142
Total LPE_P	Lysoalkenylphosphatidylethanolamines	-0.0874226	-0.149 to -0.026	0.00541036	0.0140669	-0.0855976	-0.15 to -0.028
Total PI	Phosphatidylinositols	-0.203819	-0.296 to -0.112	1.81201e-05	0.000100955	-0.200884	-0.301 to -0.118
Total PIP1	Phosphatidylinositol phosphate	-0.131304	-0.218 to -0.045	0.00308042	0.00931299	-0.135392	-0.202 to -0.038
Total LPI	Lysophosphatidylinositols	0.00575516	-0.086 to 0.097	0.901952	0.901952	0.00746646	-0.079 to 0.085
Total PS	Phosphatidylserines	0.0263435	-0.042 to 0.095	0.4509	0.532881	0.0280257	-0.059 to 0.093
Total PG	Phosphatidylglycerols	-0.10448	-0.194 to -0.015	0.0228017	0.0466346	-0.106991	-0.2 to -0.005
Total CE	Cholesteryl esters	-0.141034	-0.234 to -0.048	0.00310433	0.00931299	-0.138916	-0.241 to -0.05
Total COH	Free cholesterol	-0.0492328	-0.139 to 0.041	0.284859	0.383087	-0.049413	-0.149 to 0.043
Total DE	Dehydro-cholesteryl esters	-0.108452	-0.202 to -0.015	0.0239152	0.0466346	-0.109485	-0.205 to -0.009
Total FFA	Free fatty acids	-0.0361225	-0.111 to 0.039	0.345293	0.448881	-0.0344095	-0.113 to 0.038
Total Acylcarnitine	Acylcarnitines	-0.015798	-0.078 to 0.046	0.616756	0.650094	-0.0168393	-0.076 to 0.046
Total DG	Diacylglycerols	-0.0396502	-0.127 to 0.048	0.374716	0.471417	-0.0380929	-0.12 to 0.051
Total TG	Triacylglycerols	-0.099991	-0.194 to -0.006	0.0380907	0.0675245	-0.0992329	-0.189 to -0.012
Total TG_O	Alkyldiacylglycerols	-0.0854943	-0.174 to 0.003	0.0580431	0.0984209	-0.083759	-0.177 to -0.01
Total Ubiquinone	Ubiquinone	0.0706392	-0.015 to 0.156	0.106936	0.160404	0.0680317	-0.017 to 0.167
Total OxSpecies	Oxidised species	-0.0703777	-0.152 to 0.011	0.0910551	0.142046	-0.0698483	-0.164 to 0.014
Sph(d16:1)		-0.006862	-0.097 to 0.083	0.881048	0.914028	-0.00396726	-0.099 to 0.083
Sph(d18:1)		0.0246712	-0.04 to 0.09	0.458274	0.565375	0.0236156	-0.043 to 0.085
Sph(d18:2)		-0.0125029	-0.11 to 0.085	0.800731	0.855878	-0.0159297	-0.117 to 0.077
S1P(d16:1)		-0.00518393	-0.075 to 0.064	0.883585	0.915437	-0.0024124	-0.077 to 0.065
S1P(d18:0)		-0.0197829	-0.091 to 0.052	0.588663	0.682814	-0.0179874	-0.097 to 0.05
S1P(d18:1)		-0.0209281	-0.09 to 0.048	0.551277	0.651128	-0.0187889	-0.107 to 0.04
S1P(d18:2)		-0.0528277	-0.116 to 0.011	0.103798	0.17065	-0.0511483	-0.126 to 0
Cer(d18:0/16:0)		-0.0831151	-0.175 to 0.008	0.0757281	0.134418	-0.0823758	-0.177 to 0.007
Cer(d18:0/18:0)		0.155691	0.069 to 0.242	0.000473467	0.00246584	0.156611	0.059 to 0.24
Cer(d18:0/20:0)		0.0133286	-0.075 to 0.102	0.768622	0.830566	0.0146245	-0.073 to 0.1
Cer(d18:0/22:0)		-0.0675466	-0.153 to 0.018	0.121991	0.195185	-0.0704465	-0.17 to 0.014
Cer(d18:0/24:0)		-0.139493	-0.219 to -0.06	0.000686267	0.00332839	-0.139419	-0.219 to -0.063
Cer(d18:0/24:1)		0.000202255	-0.082 to 0.082	0.996138	0.997423	0.00137011	-0.088 to 0.081
Cer(d16:1/16:0)		0.100451	0.02 to 0.181	0.0143554	0.0369068	0.100864	0.024 to 0.182
Cer(d16:1/18:0)		0.101948	0.018 to 0.186	0.0177632	0.0436209	0.101955	0.019 to 0.191
Cer(d16:1/20:0)		0.0633914	-0.018 to 0.145	0.129	0.204172	0.0647102	-0.022 to 0.14
Cer(d16:1/22:0)		-0.0287002	-0.11 to 0.053	0.489304	0.593281	-0.0297058	-0.109 to 0.053
Cer(d16:1/23:0)		-0.0451026	-0.128 to 0.038	0.285169	0.387669	-0.0460354	-0.132 to 0.036
Cer(d16:1/24:0)		-0.0939628	-0.175 to -0.012	0.024338	0.0565459	-0.094195	-0.171 to -0.003
Cer(d16:1/24:1)		0.00794002	-0.077 to 0.093	0.855267	0.896557	0.00916526	-0.074 to 0.11
Cer(d17:1/16:0)		0.0683567	-0.019 to 0.155	0.123744	0.197583	0.06475	-0.021 to 0.166
Cer(d17:1/18:0)		0.168519	0.077 to 0.26	0.000347377	0.0019118	0.171179	0.07 to 0.254
Cer(d17:1/20:0)		0.0590195	-0.03 to 0.148	0.195634	0.287523	0.0598727	-0.03 to 0.146
Cer(d17:1/22:0)		-0.00177561	-0.087 to 0.083	0.967371	0.976177	-0.00121399	-0.075 to 0.077
Cer(d17:1/23:0)		-0.047302	-0.133 to 0.038	0.278441	0.382425	-0.0490884	-0.131 to 0.04
Cer(d17:1/24:0)		-0.0979979	-0.182 to -0.014	0.0223881	0.0531289	-0.0978369	-0.183 to -0.021
Cer(d17:1/24:1)		0.0207143	-0.066 to 0.107	0.638763	0.731091	0.0191037	-0.07 to 0.107
Cer(d18:1/14:0)		0.0811413	-0.003 to 0.165	0.0584986	0.110146	0.0813431	-0.001 to 0.17
Cer(d18:1/16:0)		0.137044	0.047 to 0.227	0.00300768	0.0105133	0.13668	0.045 to 0.24
Cer(d18:1/17:0)		0.00249262	-0.079 to 0.084	0.952239	0.969734	0.00305999	-0.079 to 0.087
Cer(d18:1/18:0)		0.252758	0.164 to 0.342	4.14669e-08	1.22263e-06	0.251943	0.153 to 0.35
Cer(d18:1/19:0)		0.112546	0.023 to 0.202	0.0143632	0.0369068	0.11353	0.023 to 0.204
Cer(d18:1/20:0)		0.151378	0.061 to 0.242	0.00110233	0.00488803	0.152022	0.069 to 0.243
Cer(d18:1/21:0)		0.096502	0.005 to 0.188	0.0391587	0.0810324	0.0971688	0.014 to 0.184
Cer(d18:1/22:0)		0.0635289	-0.028 to 0.155	0.176343	0.265713	0.0609462	-0.02 to 0.154
Cer(d18:1/23:0)		-0.0219661	-0.112 to 0.068	0.633907	0.729839	-0.0229968	-0.111 to 0.071
Cer(d18:1/24:0)		-0.0698471	-0.163 to 0.023	0.14102	0.220908	-0.069886	-0.155 to 0.017
Cer(d18:1/24:1)		0.0947327	0.003 to 0.186	0.043604	0.0883466	0.0922448	0.001 to 0.194
Cer(d18:1/26:0)		-0.00802199	-0.094 to 0.078	0.855528	0.896557	-0.00921469	-0.094 to 0.088
Cer(d18:2/14:0)		-0.0918633	-0.184 to 0	0.0517525	0.100652	-0.0938289	-0.177 to 0
Cer(d18:2/16:0)		-0.0116561	-0.098 to 0.075	0.79142	0.849436	-0.0115145	-0.102 to 0.074
Cer(d18:2/17:0)		-0.00817661	-0.1 to 0.083	0.861228	0.900692	-0.00541178	-0.112 to 0.074
Cer(d18:2/18:0)		0.0887643	0.002 to 0.176	0.0462216	0.0924309	0.0876811	0.005 to 0.174
Cer(d18:2/20:0)		-0.0134508	-0.103 to 0.076	0.769558	0.830566	-0.0127324	-0.111 to 0.067
Cer(d18:2/21:0)		-0.00887999	-0.099 to 0.081	0.847122	0.893162	-0.0107061	-0.09 to 0.084
Cer(d18:2/22:0)		-0.0555764	-0.143 to 0.032	0.214241	0.309592	-0.056676	-0.147 to 0.034
Cer(d18:2/23:0)		-0.101272	-0.187 to -0.015	0.0211902	0.0507519	-0.102456	-0.192 to -0.01
Cer(d18:2/24:0)		-0.129043	-0.218 to -0.04	0.00478721	0.0151628	-0.128981	-0.21 to -0.038
Cer(d18:2/24:1)		-0.0388465	-0.126 to 0.048	0.38331	0.490031	-0.0404986	-0.132 to 0.055
Cer(d18:2/26:0)		-0.0636345	-0.151 to 0.024	0.155229	0.239955	-0.063346	-0.151 to 0.023
Cer(d19:1/16:0)		0.0120808	-0.081 to 0.105	0.799437	0.855673	0.0137182	-0.089 to 0.095
Cer(d19:1/18:0)		0.142451	0.05 to 0.234	0.00253489	0.00927865	0.145979	0.053 to 0.234
Cer(d19:1/20:0)		0.0856684	-0.005 to 0.176	0.0646653	0.119075	0.0843646	-0.007 to 0.183
Cer(d19:1/22:0)		0.0331643	-0.058 to 0.124	0.475987	0.580764	0.0316353	-0.058 to 0.133
Cer(d19:1/23:0)		-0.0304491	-0.121 to 0.061	0.51242	0.615538	-0.0304628	-0.117 to 0.068
Cer(d19:1/24:0)		-0.0540561	-0.143 to 0.035	0.236438	0.336644	-0.0561508	-0.141 to 0.047
Cer(d19:1/24:1)		0.0170126	-0.071 to 0.105	0.705463	0.788817	0.016223	-0.066 to 0.115
Cer(d19:1/26:0)		-0.0410992	-0.129 to 0.047	0.360524	0.467057	-0.0378918	-0.135 to 0.046
Cer(d20:1/22:0)		-0.0343503	-0.122 to 0.054	0.44526	0.55461	-0.0341801	-0.122 to 0.046
Cer(d20:1/23:0)		-0.0771068	-0.169 to 0.015	0.102367	0.169015	-0.0795675	-0.164 to 0.021
Cer(d20:1/24:0)		-0.135968	-0.218 to -0.054	0.00128933	0.00542352	-0.135231	-0.232 to -0.06
Cer(d20:1/24:1)		0.0586431	-0.026 to 0.144	0.177171	0.266443	0.0601417	-0.025 to 0.137
Cer(d20:1/26:0)		-0.181753	-0.271 to -0.093	7.39366e-05	0.000551681	-0.182605	-0.266 to -0.093
Cer(m18:0/20:0)		-0.133018	-0.221 to -0.045	0.00318254	0.0109473	-0.129945	-0.222 to -0.051
Cer(m18:0/22:0)		-0.137247	-0.224 to -0.051	0.00196511	0.00747513	-0.137108	-0.213 to -0.054
Cer(m18:0/23:0)		-0.16697	-0.253 to -0.081	0.00016094	0.000999117	-0.167393	-0.247 to -0.075
Cer(m18:0/24:0)		-0.178057	-0.265 to -0.092	6.43851e-05	0.000494682	-0.179224	-0.259 to -0.094
Cer(m18:0/24:1)		-0.0617363	-0.148 to 0.025	0.1635	0.248777	-0.0655665	-0.141 to 0.025
Cer(m18:1/18:0)		-0.0736701	-0.157 to 0.01	0.0838484	0.146061	-0.0726178	-0.163 to 0.013
Cer(m18:1/20:0)		-0.163865	-0.248 to -0.08	0.000151538	0.0009487	-0.163951	-0.249 to -0.084
Cer(m18:1/22:0)		-0.212734	-0.299 to -0.127	1.77916e-06	2.4654e-05	-0.214461	-0.294 to -0.137
Cer(m18:1/23:0)		-0.223092	-0.306 to -0.14	1.97255e-07	4.05057e-06	-0.22263	-0.303 to -0.139
Cer(m18:1/24:0)		-0.210743	-0.297 to -0.124	2.40628e-06	3.16487e-05	-0.210781	-0.29 to -0.129
Cer(m18:1/24:1)		-0.132607	-0.217 to -0.048	0.00222154	0.00828806	-0.134103	-0.215 to -0.046
Cer1P(d18:1/16:0)		-0.148399	-0.238 to -0.059	0.00129308	0.00542352	-0.145013	-0.251 to -0.065
HexCer(d16:1/18:0)		0.0105168	-0.074 to 0.095	0.807604	0.861196	0.00966777	-0.079 to 0.096
HexCer(d16:1/20:0)		-0.0769713	-0.155 to 0.001	0.0529619	0.10249	-0.0782068	-0.146 to 0
HexCer(d16:1/22:0)		-0.0454465	-0.125 to 0.034	0.261418	0.363549	-0.0450282	-0.125 to 0.025
HexCer(d16:1/24:0)		-0.0509649	-0.131 to 0.029	0.211571	0.306304	-0.0520421	-0.121 to 0.032
HexCer(d18:1/16:0)		0.249839	0.169 to 0.331	3.35871e-09	2.56763e-07	0.249119	0.168 to 0.336
HexCer(d18:1/18:0)		0.042269	-0.038 to 0.123	0.304569	0.406791	0.0419899	-0.036 to 0.12
HexCer(d18:1/20:0)		-0.0465103	-0.125 to 0.032	0.244127	0.34432	-0.0463596	-0.124 to 0.036
HexCer(d18:1/22:0)		-0.0132865	-0.095 to 0.069	0.750961	0.821927	-0.0124774	-0.104 to 0.066
HexCer(d18:1/24:0)		-0.00369028	-0.085 to 0.078	0.929101	0.951164	-0.00497192	-0.089 to 0.072
HexCer(d18:1/24:1)		0.132642	0.053 to 0.212	0.0011939	0.00520486	0.128955	0.051 to 0.22
HexCer(d18:2/18:0)		-0.0705168	-0.156 to 0.015	0.107637	0.174376	-0.0716872	-0.158 to 0.013
HexCer(d18:2/20:0)		-0.0351956	-0.124 to 0.053	0.436199	0.545073	-0.0361382	-0.141 to 0.066
HexCer(d18:2/22:0)		-0.0504956	-0.132 to 0.031	0.228043	0.326497	-0.0533377	-0.127 to 0.035
HexCer(d18:2/24:0)		-0.070253	-0.151 to 0.011	0.0889272	0.152334	-0.0711246	-0.147 to 0.012
Hex2Cer(d16:1/16:0)		0.220326	0.138 to 0.303	2.47668e-07	4.80476e-06	0.223685	0.137 to 0.3
Hex2Cer(d16:1/24:1)		0.0897354	0.005 to 0.175	0.0390884	0.0810324	0.0900853	-0.003 to 0.174
Hex2Cer(d18:1/16:0)		0.181205	0.089 to 0.273	0.000133328	0.000869434	0.179283	0.094 to 0.276
Hex2Cer(d18:1/18:0)		-0.101421	-0.19 to -0.013	0.0247382	0.056964	-0.100534	-0.184 to -0.007
Hex2Cer(d18:1/20:0)		0.072664	-0.016 to 0.161	0.107302	0.174198	0.0706456	-0.01 to 0.166
Hex2Cer(d18:1/22:0)		0.0840967	-0.003 to 0.171	0.0588965	0.110146	0.0862868	-0.002 to 0.162
Hex2Cer(d18:1/24:0)		0.0133956	-0.073 to 0.1	0.761003	0.827085	0.0156959	-0.073 to 0.094
Hex2Cer(d18:1/24:1)		0.150421	0.063 to 0.238	0.000865595	0.00404639	0.151735	0.065 to 0.238
Hex2Cer(d18:2/16:0)		0.25982	0.174 to 0.346	6.45701e-09	4.17553e-07	0.260747	0.18 to 0.351
Hex2Cer(d18:2/24:1)		0.0731498	-0.013 to 0.159	0.0960981	0.16037	0.0739318	-0.009 to 0.15
Hex3Cer(d18:1/16:0)		-0.115191	-0.204 to -0.026	0.0113348	0.0301227	-0.11531	-0.201 to -0.024
Hex3Cer(d18:1/18:0)		-0.120023	-0.202 to -0.038	0.00431934	0.0140832	-0.121754	-0.202 to -0.035
Hex3Cer(d18:1/20:0)		-0.0904808	-0.176 to -0.005	0.0379212	0.0793176	-0.0911401	-0.175 to -0.006
Hex3Cer(d18:1/22:0)		-0.12579	-0.211 to -0.041	0.00385892	0.012852	-0.127617	-0.211 to -0.038
Hex3Cer(d18:1/24:0)		-0.098181	-0.184 to -0.013	0.0251407	0.05738	-0.100325	-0.176 to -0.011
Hex3Cer(d18:1/24:1)		-0.045068	-0.133 to 0.043	0.316532	0.420597	-0.0445225	-0.139 to 0.047
GM3(d18:1/16:0)		0.191901	0.105 to 0.278	1.71197e-05	0.000154476	0.189584	0.108 to 0.301
GM3(d18:1/18:0)		-0.11817	-0.207 to -0.029	0.00943345	0.0263322	-0.119397	-0.212 to -0.023
GM3(d18:1/20:0)		0.166072	0.085 to 0.247	7.16115e-05	0.00053952	0.166026	0.084 to 0.25
GM3(d18:1/22:0)		0.0280317	-0.063 to 0.119	0.545307	0.645058	0.027827	-0.071 to 0.121
GM3(d18:1/24:0)		0.00246961	-0.089 to 0.094	0.958003	0.970735	0.0055877	-0.096 to 0.095
GM3(d18:1/24:1)		0.0171657	-0.072 to 0.107	0.70675	0.789119	0.0153309	-0.071 to 0.124
GM1(d18:1/16:0)		0.0309289	-0.059 to 0.121	0.500085	0.605408	0.0315254	-0.059 to 0.123
Sulfatide (d18:1:/16:0(OH))		-0.130208	-0.219 to -0.041	0.00441044	0.0143018	-0.130138	-0.214 to -0.034
Sulfatide (d18:1:/16:0)		-0.180782	-0.265 to -0.097	2.8207e-05	0.000240534	-0.181812	-0.266 to -0.101
Sulfatide (d18:1:/24:0(OH))		-0.140426	-0.225 to -0.056	0.00120632	0.00521792	-0.140305	-0.231 to -0.06
Sulfatide (d18:1:/24:0)		-0.238048	-0.323 to -0.153	7.45341e-08	1.80745e-06	-0.238747	-0.325 to -0.157
Sulfatide (d18:1:/24:1(OH))		-0.153228	-0.237 to -0.069	0.000391054	0.00212208	-0.15033	-0.239 to -0.07
Sulfatide (d18:1:/24:1)		-0.233179	-0.317 to -0.15	7.76633e-08	1.82626e-06	-0.235101	-0.315 to -0.15
SM(34:3)		-0.078745	-0.17 to 0.012	0.0897953	0.15281	-0.0755124	-0.165 to 0.004
SM(35:2) (b)		-0.0258863	-0.12 to 0.068	0.59004	0.68339	-0.0250803	-0.118 to 0.075
SM(37:1)		0.0194036	-0.069 to 0.108	0.66651	0.757265	0.0200175	-0.074 to 0.108
SM(37:2)		-0.0497077	-0.141 to 0.041	0.284973	0.387669	-0.04976	-0.142 to 0.041
SM(38:3) (a)		0.124746	0.036 to 0.214	0.0062923	0.0189993	0.125116	0.038 to 0.212
SM(38:3) (b)		0.00324414	-0.09 to 0.096	0.945442	0.964077	0.00325403	-0.094 to 0.09
SM(40:3) (a)		0.0611835	-0.032 to 0.154	0.198476	0.291149	0.0585939	-0.022 to 0.151
SM(40:3) (b)		0.0394429	-0.051 to 0.13	0.391829	0.498458	0.0404564	-0.058 to 0.126
SM(41:0)		0.0176705	-0.063 to 0.099	0.668888	0.758855	0.0193851	-0.06 to 0.099
SM(41:1) (a)		0.0419086	-0.048 to 0.132	0.362516	0.468074	0.0406	-0.056 to 0.128
SM(43:1)		0.024226	-0.064 to 0.113	0.592642	0.68538	0.0229077	-0.066 to 0.117
SM(43:2) (b)		0.113398	0.022 to 0.205	0.0153196	0.0391053	0.112432	0.015 to 0.212
SM(43:2) (c)		0.042805	-0.049 to 0.134	0.360481	0.467057	0.0454873	-0.062 to 0.135
SM(44:1)		0.048912	-0.041 to 0.138	0.284361	0.387669	0.0478729	-0.043 to 0.138
SM(44:2)		0.0693357	-0.017 to 0.156	0.118275	0.189632	0.0688873	-0.025 to 0.155
SM(44:3)		0.0486308	-0.041 to 0.138	0.285904	0.38787	0.0479632	-0.058 to 0.135
SM(d16:1/19:0)		-0.00869722	-0.099 to 0.082	0.850299	0.895295	-0.00885178	-0.105 to 0.092
SM(d16:1/23:0)/SM(d17:1/22:0)		-0.0147277	-0.1 to 0.07	0.734735	0.811732	-0.0130251	-0.1 to 0.073
SM(d16:1/24:1)		0.0595089	-0.03 to 0.149	0.193066	0.284827	0.0561323	-0.026 to 0.144
SM(d17:1/14:0)		-0.0738565	-0.16 to 0.012	0.0923646	0.155253	-0.0714413	-0.167 to 0.012
SM(d17:1/16:0)		-0.0257018	-0.113 to 0.061	0.562233	0.66105	-0.026261	-0.114 to 0.06
SM(d17:1/24:1)		0.0743632	-0.015 to 0.164	0.105466	0.173027	0.0724034	-0.023 to 0.161
SM(d18:0/14:0)		-0.039473	-0.127 to 0.048	0.377243	0.485474	-0.038655	-0.134 to 0.051
SM(d18:0/16:0)		-0.00362501	-0.086 to 0.079	0.931571	0.952436	-0.00415057	-0.096 to 0.087
SM(d18:0/22:0)		0.0261499	-0.051 to 0.103	0.504788	0.607752	0.0240867	-0.055 to 0.102
SM(d18:1/14:0/SM(d16:1/16:0)		0.0147863	-0.071 to 0.1	0.735371	0.811732	0.0149774	-0.075 to 0.098
SM(d18:1/16:0)		-0.0218431	-0.117 to 0.074	0.654016	0.744487	-0.0229582	-0.115 to 0.082
SM(d18:1/17:0)/SM(d17:1/18:0)		0.0778049	-0.011 to 0.167	0.0870532	0.150789	0.0770517	-0.016 to 0.166
SM(d18:1/18:0/SM(d16:1/20:0)		0.0206612	-0.068 to 0.109	0.647521	0.738936	0.0216131	-0.064 to 0.108
SM(d18:1/20:0)/SM(d16:1/22:0)		-0.00538564	-0.093 to 0.082	0.903864	0.930517	-0.00504699	-0.09 to 0.075
SM(d18:1/22:0)/SM(d16:1/24:0)		0.0499636	-0.042 to 0.142	0.288538	0.39008	0.0481446	-0.037 to 0.15
SM(d18:1/23:0)/SM(d17:1/24:0)		0.0345996	-0.057 to 0.126	0.457631	0.565375	0.0348971	-0.062 to 0.139
SM(d18:1/24:0)		0.0136947	-0.075 to 0.103	0.763328	0.827294	0.0101196	-0.077 to 0.098
SM(d18:1/24:1)		0.116843	0.027 to 0.207	0.0112294	0.0299452	0.114623	0.036 to 0.213
SM(d18:2/14:0)		-0.141425	-0.226 to -0.057	0.00113271	0.00499422	-0.141328	-0.228 to -0.055
SM(d18:2/16:0)		-0.0888772	-0.177 to -0.001	0.047644	0.093837	-0.0919871	-0.176 to -0.002
SM(d18:2/17:0)		-0.0497462	-0.139 to 0.039	0.274353	0.377479	-0.0461368	-0.132 to 0.039
SM(d18:2/18:0)		-0.0394642	-0.128 to 0.049	0.380349	0.487047	-0.0373606	-0.129 to 0.049
SM(d18:2/18:1)		-0.0146332	-0.109 to 0.079	0.760197	0.827085	-0.0111614	-0.109 to 0.078
SM(d18:2/20:0)		-0.0444017	-0.135 to 0.046	0.336717	0.439886	-0.0438268	-0.137 to 0.053
SM(d18:2/22:0)		-0.0190269	-0.109 to 0.071	0.679753	0.766698	-0.0186006	-0.112 to 0.075
SM(d18:2/23:0)		-0.026396	-0.116 to 0.063	0.564102	0.662244	-0.0274296	-0.115 to 0.073
SM(d18:2/24:0)		-0.0179693	-0.107 to 0.071	0.691269	0.776302	-0.0204636	-0.106 to 0.078
SM(d19:1/24:1)		0.0600083	-0.027 to 0.147	0.17862	0.267623	0.0603365	-0.035 to 0.143
PA(34:1)		-0.0946296	-0.156 to -0.033	0.00274587	0.00986479	-0.0954451	-0.172 to -0.032
PA(36:1)		-0.064032	-0.137 to 0.009	0.0873526	0.15097	-0.0654198	-0.156 to 0.01
PA(36:2)		-0.093397	-0.151 to -0.035	0.00173621	0.00690921	-0.0950821	-0.159 to -0.03
PA(36:3)		-0.0623709	-0.117 to -0.007	0.0270286	0.0609715	-0.0627045	-0.124 to -0.011
PA(36:4)		-0.0706484	-0.135 to -0.006	0.0327001	0.0712789	-0.068395	-0.164 to -0.009
PA(40:6)		-0.0129536	-0.094 to 0.068	0.755172	0.825362	-0.0129348	-0.096 to 0.057
PC(14:0_16:0)		-0.0977599	-0.187 to -0.009	0.0319623	0.0698669	-0.0977599	-0.191 to -0.012
PC(14:0_20:4)		-0.161808	-0.248 to -0.076	0.00025584	0.00145979	-0.164862	-0.24 to -0.08
PC(14:0_22:6)		-0.166276	-0.252 to -0.081	0.000151596	0.0009487	-0.167403	-0.24 to -0.086
PC(15-MHDA_18:1)		-0.089213	-0.177 to -0.001	0.046937	0.0929162	-0.0888618	-0.177 to -0.011
PC(15-MHDA_18:2)		-0.152153	-0.237 to -0.067	0.000512093	0.00261437	-0.15048	-0.231 to -0.069
PC(15-MHDA_20:4)		-0.103344	-0.188 to -0.019	0.0169547	0.0423051	-0.10255	-0.184 to -0.031
PC(15-MHDA_22:6)		-0.135112	-0.215 to -0.055	0.00102402	0.00462307	-0.134327	-0.206 to -0.06
PC(15:0_20:3)		-0.0961229	-0.185 to -0.007	0.0342874	0.0739083	-0.0957373	-0.185 to -0.012
PC(15:0_20:4)		-0.113289	-0.195 to -0.032	0.00668537	0.0198028	-0.111954	-0.188 to -0.038
PC(15:0_22:6)		-0.146165	-0.225 to -0.068	0.000296524	0.00164359	-0.145682	-0.215 to -0.075
PC(16:0_16:0)		-0.0308282	-0.125 to 0.063	0.520452	0.622296	-0.0331227	-0.131 to 0.064
PC(16:0_18:0)		-0.0519764	-0.14 to 0.036	0.24707	0.346703	-0.0515619	-0.143 to 0.035
PC(16:0_18:1)		-0.102877	-0.192 to -0.014	0.0242251	0.0564525	-0.104609	-0.203 to -0.023
PC(16:0_18:2)		-0.119718	-0.216 to -0.023	0.0156034	0.03958	-0.118304	-0.216 to -0.026
PC(16:0_18:3) (a)		-0.134126	-0.224 to -0.044	0.00374838	0.0125919	-0.134638	-0.213 to -0.052
PC(16:0_18:3) (b)		-0.0870152	-0.172 to -0.002	0.0463346	0.0924309	-0.0879205	-0.177 to -0.005
PC(16:0_20:3) (a)		-0.0932727	-0.183 to -0.004	0.0416989	0.0853782	-0.0941097	-0.187 to -0.009
PC(16:0_20:3) (b)		-0.0289009	-0.119 to 0.061	0.530545	0.630479	-0.0308447	-0.122 to 0.058
PC(16:0_20:4)		-0.0142427	-0.092 to 0.063	0.718859	0.79919	-0.0135444	-0.097 to 0.06
PC(16:0_20:5)		-0.0801507	-0.165 to 0.004	0.0635491	0.117695	-0.0839835	-0.156 to 0.004
PC(16:0_22:6)		-0.0978921	-0.178 to -0.018	0.0173401	0.0429595	-0.097119	-0.172 to -0.024
PC(16:1_18:2)		-0.26464	-0.353 to -0.177	7.37973e-09	4.40513e-07	-0.263794	-0.346 to -0.184
PC(16:1_20:4)		-0.193588	-0.277 to -0.11	7.7993e-06	8.90038e-05	-0.192796	-0.269 to -0.118
PC(16:1_22:6)		-0.217929	-0.299 to -0.137	2.08393e-07	4.14649e-06	-0.217475	-0.289 to -0.139
PC(17:0_18:1)		-0.11611	-0.205 to -0.027	0.0106306	0.0288438	-0.116869	-0.199 to -0.029
PC(17:0_18:2)		-0.177796	-0.261 to -0.095	3.3615e-05	0.000274582	-0.176231	-0.26 to -0.105
PC(17:0_20:4)		-0.0994789	-0.18 to -0.019	0.0158055	0.0396927	-0.101231	-0.179 to -0.028
PC(17:0_22:6)		-0.0969047	-0.173 to -0.021	0.0130438	0.0341959	-0.0975631	-0.173 to -0.025
PC(17:1_18:2)		-0.241084	-0.33 to -0.152	1.60806e-07	3.56531e-06	-0.241638	-0.319 to -0.171
PC(18:0_18:1)		-0.0738901	-0.164 to 0.017	0.110426	0.177781	-0.0726771	-0.163 to 0.022
PC(18:0_18:2)		-0.115313	-0.211 to -0.02	0.0181085	0.0443286	-0.116944	-0.2 to -0.016
PC(18:0_20:3)		-0.0555768	-0.144 to 0.033	0.219843	0.317097	-0.0555578	-0.14 to 0.041
PC(18:0_20:4)		-0.0268982	-0.108 to 0.054	0.516809	0.619851	-0.0268565	-0.112 to 0.053
PC(18:0_22:4)		-0.032444	-0.12 to 0.056	0.47013	0.575428	-0.0309822	-0.117 to 0.066
PC(18:0_22:5) (n3)		-0.0676888	-0.154 to 0.019	0.125928	0.200657	-0.0677678	-0.155 to 0.016
PC(18:0_22:5) (n6)		0.00401452	-0.082 to 0.09	0.927087	0.950356	0.00381836	-0.079 to 0.084
PC(18:0_22:6)		-0.0148242	-0.095 to 0.065	0.715823	0.796956	-0.0122342	-0.094 to 0.065
PC(18:1_18:1)		-0.12419	-0.22 to -0.029	0.0112187	0.0299452	-0.126749	-0.209 to -0.031
PC(18:1_18:2)		-0.246444	-0.341 to -0.152	4.25727e-07	7.50828e-06	-0.244983	-0.328 to -0.154
PC(18:1_20:3)		-0.165427	-0.254 to -0.077	0.000274001	0.001552	-0.163776	-0.247 to -0.084
PC(18:1_22:6) (a)		-0.123766	-0.211 to -0.036	0.0058304	0.017883	-0.125772	-0.22 to -0.044
PC(18:1_22:6) (b)		-0.0359138	-0.122 to 0.05	0.412497	0.521331	-0.0353438	-0.113 to 0.04
PC(18:2_18:2)		-0.23975	-0.333 to -0.147	6.42536e-07	1.06087e-05	-0.238854	-0.318 to -0.15
PC(18:2_20:5)		-0.200362	-0.288 to -0.113	9.5726e-06	0.000104624	-0.200687	-0.279 to -0.12
PC(20:0_20:4)		-0.0983773	-0.191 to -0.006	0.0377827	0.0792415	-0.0990721	-0.21 to -0.009
PC(28:0)		-0.101821	-0.189 to -0.015	0.0219202	0.0521781	-0.101617	-0.185 to -0.016
PC(31:0) (a)		-0.0551239	-0.144 to 0.034	0.225244	0.323683	-0.0538722	-0.149 to 0.032
PC(31:0) (b)		-0.0262526	-0.116 to 0.063	0.56657	0.663135	-0.0297951	-0.104 to 0.064
PC(32:1)		-0.0816946	-0.167 to 0.003	0.0606589	0.112611	-0.0819854	-0.164 to -0.006
PC(32:2)		-0.190226	-0.278 to -0.102	2.66806e-05	0.000230046	-0.188903	-0.276 to -0.11
PC(33:0) (a)		-0.0814079	-0.169 to 0.007	0.070474	0.127181	-0.0820226	-0.168 to 0.006
PC(33:0) (b)		-0.0449666	-0.136 to 0.046	0.331297	0.433775	-0.0445295	-0.129 to 0.047
PC(33:1)		-0.103905	-0.191 to -0.017	0.0199334	0.048188	-0.102208	-0.19 to -0.021
PC(33:2)		-0.152636	-0.24 to -0.065	0.000681097	0.0033241	-0.150555	-0.239 to -0.07
PC(34:5)		-0.127926	-0.216 to -0.04	0.00450141	0.0144343	-0.126834	-0.22 to -0.054
PC(35:5)		-0.0946051	-0.181 to -0.008	0.0328683	0.0714448	-0.0941965	-0.18 to -0.015
PC(36:6) (a)		-0.148349	-0.235 to -0.061	0.000906281	0.00418616	-0.149621	-0.227 to -0.066
PC(38:2)		-0.10217	-0.197 to -0.007	0.0356386	0.0766081	-0.103046	-0.192 to -0.015
PC(38:4) (b)		-0.0907038	-0.179 to -0.002	0.0449351	0.0908063	-0.0885583	-0.179 to -0.013
PC(38:5) (a)		-0.134357	-0.218 to -0.051	0.00166991	0.00671426	-0.131935	-0.229 to -0.056
PC(38:5) (b)		-0.0777742	-0.163 to 0.008	0.0753736	0.134418	-0.0765272	-0.157 to 0.002
PC(38:6) (a)		-0.224386	-0.311 to -0.137	6.14417e-07	1.03649e-05	-0.225452	-0.299 to -0.143
PC(38:7)(c)		-0.200902	-0.279 to -0.123	7.24566e-07	1.14748e-05	-0.201063	-0.275 to -0.124
PC(39:5)(a)		-0.166725	-0.249 to -0.085	7.99035e-05	0.00057193	-0.167926	-0.238 to -0.084
PC(39:5)(b)		-0.146711	-0.23 to -0.063	0.000615733	0.00308264	-0.145499	-0.234 to -0.066
PC(40:10)		-0.0549947	-0.129 to 0.019	0.144941	0.225852	-0.0538512	-0.124 to 0.02
PC(40:7) (a)		-0.267194	-0.352 to -0.182	1.60289e-09	1.5548e-07	-0.266129	-0.355 to -0.19
PC(40:8)		-0.253907	-0.333 to -0.175	8.60265e-10	1.21122e-07	-0.253088	-0.33 to -0.184
PC(44:12)		-0.172347	-0.249 to -0.096	1.25875e-05	0.000134211	-0.171895	-0.248 to -0.094
PC(O-16:0/16:0)		-0.0284281	-0.12 to 0.063	0.541107	0.641068	-0.0305508	-0.128 to 0.082
PC(O-16:0/20:3)		-0.0183953	-0.105 to 0.068	0.677065	0.764778	-0.0168575	-0.104 to 0.07
PC(O-16:0/20:4)		-0.0764412	-0.165 to 0.012	0.0899953	0.152815	-0.0762203	-0.167 to 0.008
PC(O-16:0/22:6)		0.00722439	-0.069 to 0.084	0.853014	0.896557	0.00636884	-0.064 to 0.089
PC(O-18:0/18:1)		-0.0494165	-0.137 to 0.038	0.267039	0.369783	-0.0487959	-0.142 to 0.041
PC(O-18:0/18:2)		-0.136028	-0.224 to -0.048	0.00270828	0.00977501	-0.137248	-0.218 to -0.046
PC(O-18:0/20:4)		-0.0516615	-0.137 to 0.034	0.236866	0.336644	-0.0520911	-0.139 to 0.03
PC(O-18:0/22:6)		0.00598091	-0.069 to 0.081	0.875373	0.910576	0.00550142	-0.068 to 0.081
PC(O-18:1/18:1)		-0.126413	-0.218 to -0.035	0.00717921	0.0210229	-0.125733	-0.221 to -0.039
PC(O-18:1/18:2)		-0.150369	-0.242 to -0.059	0.00133052	0.00549192	-0.150199	-0.239 to -0.056
PC(O-32:1)		-0.116553	-0.197 to -0.036	0.00481423	0.0151864	-0.116106	-0.192 to -0.037
PC(O-32:2)		-0.132938	-0.218 to -0.047	0.00243221	0.00903058	-0.132547	-0.217 to -0.049
PC(O-34:1)		-0.0449039	-0.128 to 0.038	0.288424	0.39008	-0.0471219	-0.119 to 0.042
PC(O-34:2)		-0.17048	-0.26 to -0.081	0.000230119	0.00134265	-0.169534	-0.257 to -0.083
PC(O-34:4)		-0.147343	-0.236 to -0.059	0.00114264	0.00500954	-0.14634	-0.236 to -0.052
PC(O-35:4)		-0.0982496	-0.184 to -0.013	0.025015	0.05738	-0.0983366	-0.176 to -0.016
PC(O-36:0)		-0.0139755	-0.103 to 0.075	0.758575	0.826762	-0.0155379	-0.101 to 0.075
PC(O-36:5)		-0.0322886	-0.119 to 0.055	0.466323	0.572573	-0.0316243	-0.115 to 0.055
PC(O-38:5)		-0.045661	-0.136 to 0.045	0.321449	0.423505	-0.0475323	-0.139 to 0.046
PC(O-40:5)		0.0270654	-0.056 to 0.111	0.525655	0.626587	0.0285626	-0.058 to 0.105
PC(O-40:7) (a)		0.0310286	-0.049 to 0.111	0.446159	0.554839	0.0296786	-0.052 to 0.11
PC(O-40:7) (b)		0.0183978	-0.043 to 0.08	0.556797	0.656649	0.0188719	-0.049 to 0.104
PC(P-15:0/20:4) (a)		-0.0682125	-0.156 to 0.02	0.129186	0.204172	-0.0664018	-0.158 to 0.022
PC(P-15:0/20:4) (b)		-0.101746	-0.19 to -0.013	0.0244687	0.0566798	-0.101259	-0.191 to -0.022
PC(P-16:0/14:0)		-0.162498	-0.246 to -0.079	0.00016404	0.00101028	-0.159996	-0.255 to -0.074
PC(P-16:0/16:0)		-0.177932	-0.261 to -0.095	3.23438e-05	0.000272813	-0.178059	-0.268 to -0.105
PC(P-16:0/16:1)		-0.228444	-0.308 to -0.148	3.74913e-08	1.16373e-06	-0.22929	-0.308 to -0.144
PC(P-16:0/18:0)		-0.0950417	-0.181 to -0.009	0.0316791	0.0697457	-0.095314	-0.193 to -0.008
PC(P-16:0/18:1)		-0.196233	-0.276 to -0.116	2.13297e-06	2.85377e-05	-0.196154	-0.278 to -0.124
PC(P-16:0/18:2)		-0.243477	-0.33 to -0.157	6.48553e-08	1.67759e-06	-0.239897	-0.333 to -0.164
PC(P-16:0/18:3)		-0.154235	-0.244 to -0.064	0.000840397	0.00395241	-0.151002	-0.247 to -0.073
PC(P-16:0/20:4)		-0.186609	-0.267 to -0.106	7.49167e-06	8.67692e-05	-0.185074	-0.267 to -0.102
PC(P-16:0/20:5)		-0.113009	-0.197 to -0.029	0.00837331	0.0237142	-0.111303	-0.2 to -0.031
PC(P-16:0/22:6)		-0.11864	-0.194 to -0.043	0.00217243	0.00814398	-0.118676	-0.196 to -0.048
PC(P-17:0/20:4) (a)		-0.126417	-0.203 to -0.05	0.00129997	0.00542352	-0.123228	-0.202 to -0.057
PC(P-17:0/20:4) (b)		-0.131207	-0.208 to -0.055	0.000828283	0.00391919	-0.12968	-0.216 to -0.064
PC(P-18:0/18:2)		-0.186739	-0.27 to -0.103	1.48281e-05	0.000146815	-0.184191	-0.274 to -0.108
PC(P-18:0/20:4)		-0.136481	-0.212 to -0.061	0.000408474	0.0021587	-0.137804	-0.219 to -0.064
PC(P-18:0/22:5)		-0.0394749	-0.115 to 0.036	0.306745	0.408993	-0.0383556	-0.116 to 0.039
PC(P-18:0/22:6)		-0.0422955	-0.116 to 0.031	0.259503	0.361534	-0.0419152	-0.118 to 0.027
PC(P-18:1/18:1)		-0.126289	-0.209 to -0.044	0.00288663	0.0102753	-0.127512	-0.212 to -0.034
PC(P-18:1/22:6)		-0.0981191	-0.175 to -0.021	0.0132195	0.0344239	-0.098714	-0.181 to -0.014
PC(P-20:0/20:4)		-0.0691074	-0.146 to 0.008	0.079094	0.139177	-0.0708292	-0.141 to 0.005
PC(P-35:2)(a)		-0.158198	-0.237 to -0.079	0.000102968	0.000709954	-0.157042	-0.24 to -0.089
PC(P-35:2)(b)		-0.14186	-0.226 to -0.058	0.001038	0.00462922	-0.140961	-0.228 to -0.068
PC(P-36:3)		-0.182639	-0.266 to -0.099	2.34733e-05	0.000204666	-0.180954	-0.273 to -0.092
PC(P-38:5) (a)		-0.166689	-0.245 to -0.088	3.67453e-05	0.000293963	-0.165296	-0.257 to -0.089
PC(P-38:5) (b)		-0.108784	-0.191 to -0.027	0.00978565	0.0271202	-0.108644	-0.19 to -0.029
LPC(14:0) [sn1]		-0.141764	-0.22 to -0.064	0.000402743	0.0021587	-0.142122	-0.218 to -0.063
LPC(14:0) [sn2]		-0.141321	-0.22 to -0.063	0.00043844	0.00229885	-0.138779	-0.216 to -0.065
LPC(15-MHDA) [sn1] [104_sn1]		-0.163131	-0.239 to -0.087	3.32384e-05	0.000274582	-0.163399	-0.236 to -0.087
LPC(15-MHDA) [sn1] / LPC(17:0) [sn2]		-0.161977	-0.235 to -0.089	1.66253e-05	0.000151779	-0.159425	-0.233 to -0.087
LPC(15-MHDA) [sn2]		-0.166523	-0.243 to -0.09	2.26531e-05	0.000199759	-0.165694	-0.247 to -0.097
LPC(15:0) [sn1]		-0.148366	-0.224 to -0.073	0.000125118	0.000829844	-0.146835	-0.229 to -0.08
LPC(15:0) [sn2]		-0.147487	-0.226 to -0.069	0.000276729	0.0015561	-0.148854	-0.218 to -0.062
LPC(16:0) [sn1]		-0.167778	-0.231 to -0.104	3.31377e-07	5.98019e-06	-0.166723	-0.239 to -0.111
LPC(16:0) [sn2]		-0.138385	-0.2 to -0.077	1.38221e-05	0.00014181	-0.135203	-0.204 to -0.08
LPC(16:1) [sn1]		-0.175351	-0.249 to -0.101	4.59419e-06	5.48476e-05	-0.175252	-0.247 to -0.102
LPC(16:1) [sn2]		-0.173935	-0.252 to -0.096	1.65967e-05	0.000151779	-0.173722	-0.246 to -0.101
LPC(17:0) [sn1]		-0.154162	-0.221 to -0.087	8.389e-06	9.43458e-05	-0.150707	-0.224 to -0.097
LPC(17:1) (a) [sn1] [104_sn1]		-0.173857	-0.252 to -0.096	1.51977e-05	0.000146815	-0.172147	-0.257 to -0.107
LPC(17:1) [sn1] (a) / LPC(17:1) [sn2] (b)		-0.175642	-0.255 to -0.097	1.60355e-05	0.000149922	-0.176092	-0.248 to -0.104
LPC(17:1) [sn1] (b)		-0.1434	-0.23 to -0.056	0.00131114	0.00544088	-0.14574	-0.231 to -0.06
LPC(17:1) [sn2] (a)		-0.19109	-0.271 to -0.111	3.81868e-06	4.77951e-05	-0.191802	-0.269 to -0.116
LPC(18:0) [sn1]		-0.130835	-0.195 to -0.067	6.64681e-05	0.000505679	-0.127946	-0.199 to -0.071
LPC(18:0) [sn2]		-0.142575	-0.207 to -0.079	1.5447e-05	0.000146815	-0.140688	-0.212 to -0.078
LPC(18:1) [sn1]		-0.173034	-0.244 to -0.102	2.53003e-06	3.27218e-05	-0.1707	-0.247 to -0.105
LPC(18:1) [sn2]		-0.193841	-0.27 to -0.118	7.81098e-07	1.18849e-05	-0.192749	-0.274 to -0.113
LPC(18:2) [sn1]		-0.25056	-0.335 to -0.166	1.29842e-08	5.92693e-07	-0.247547	-0.331 to -0.176
LPC(18:2) [sn2]		-0.254867	-0.341 to -0.169	1.06407e-08	5.5048e-07	-0.253989	-0.332 to -0.174
LPC(18:3) (a) [sn1] [104_sn1]		-0.172728	-0.259 to -0.086	0.000102429	0.000709954	-0.170908	-0.257 to -0.089
LPC(18:3) [sn1] (a)/LPC(18:3) [sn2] (b)		-0.18446	-0.271 to -0.098	3.50549e-05	0.000283361	-0.183839	-0.271 to -0.105
LPC(18:3) [sn1] (b)		-0.179203	-0.267 to -0.091	8.03355e-05	0.00057193	-0.174983	-0.266 to -0.098
LPC(18:3) [sn2] (a)		-0.167031	-0.256 to -0.078	0.000280284	0.00156475	-0.165549	-0.257 to -0.089
LPC(19:0) (a) [sn1] [104_sn1]		-0.207983	-0.281 to -0.135	3.62775e-08	1.16373e-06	-0.207504	-0.284 to -0.134
LPC(19:0) [sn1] (a) / LPC(19:0) [sn2] (b)		-0.215144	-0.285 to -0.145	3.56424e-09	2.56763e-07	-0.214074	-0.292 to -0.148
LPC(19:0) [sn1] (b)		-0.21075	-0.282 to -0.139	1.46327e-08	6.30832e-07	-0.20859	-0.283 to -0.14
LPC(19:0) [sn2] (a)		-0.197093	-0.27 to -0.124	1.81643e-07	3.91542e-06	-0.195806	-0.278 to -0.131
LPC(19:1) (a)		-0.171711	-0.244 to -0.099	4.81721e-06	5.66387e-05	-0.172438	-0.245 to -0.101
LPC(19:1) (b)		-0.163483	-0.237 to -0.09	1.53026e-05	0.000146815	-0.161999	-0.235 to -0.095
LPC(19:1) (c)		-0.146557	-0.228 to -0.065	0.000497263	0.00255547	-0.146392	-0.224 to -0.069
LPC(20:0) [sn1]		-0.201014	-0.27 to -0.132	2.18742e-08	7.7885e-07	-0.199883	-0.271 to -0.143
LPC(20:0) [sn2]		-0.213868	-0.283 to -0.144	3.63968e-09	2.56763e-07	-0.211513	-0.285 to -0.16
LPC(20:1) [sn1]		-0.11841	-0.179 to -0.058	0.00013882	0.000897701	-0.116787	-0.177 to -0.062
LPC(20:1) [sn2]		-0.125016	-0.191 to -0.059	0.000248116	0.00142621	-0.123821	-0.19 to -0.065
LPC(20:2) [sn1]		-0.174613	-0.244 to -0.105	1.2466e-06	1.75884e-05	-0.171874	-0.239 to -0.104
LPC(20:2) [sn2]		-0.168345	-0.243 to -0.094	1.26838e-05	0.000134211	-0.167504	-0.249 to -0.1
LPC(20:3) [sn1]		-0.134318	-0.218 to -0.05	0.00181651	0.00708348	-0.135601	-0.215 to -0.046
LPC(20:3) [sn2]		-0.135939	-0.222 to -0.05	0.00214134	0.00806641	-0.132515	-0.223 to -0.053
LPC(20:4) [sn1]		-0.0738154	-0.15 to 0.003	0.0592942	0.110341	-0.0722559	-0.146 to 0
LPC(20:4) [sn2]		-0.0806968	-0.159 to -0.003	0.0435602	0.0883466	-0.0788959	-0.153 to -0.008
LPC(20:5) [sn1]		-0.0630864	-0.145 to 0.019	0.133818	0.211063	-0.063561	-0.141 to 0.019
LPC(20:5) [sn2]		-0.0610335	-0.145 to 0.023	0.156235	0.240553	-0.062288	-0.14 to 0.028
LPC(22:0) [sn1]		-0.298215	-0.386 to -0.211	6.81063e-11	3.25594e-08	-0.297221	-0.379 to -0.208
LPC(22:0) [sn2]		-0.297726	-0.387 to -0.208	1.74816e-10	4.5219e-08	-0.29438	-0.389 to -0.221
LPC(22:1) [sn1]		-0.207528	-0.278 to -0.137	1.55987e-08	6.37083e-07	-0.20645	-0.287 to -0.139
LPC(22:1) [sn2]		-0.18902	-0.263 to -0.115	6.92504e-07	1.11955e-05	-0.189146	-0.261 to -0.118
LPC(22:4) [sn1]		-0.100975	-0.176 to -0.026	0.00891967	0.024988	-0.10062	-0.171 to -0.025
LPC(22:4) [sn2]		-0.0966694	-0.176 to -0.017	0.017702	0.0436087	-0.0955316	-0.17 to -0.02
LPC(22:5) (n3) [sn1] [104_sn1]		-0.127928	-0.205 to -0.051	0.00128363	0.00542352	-0.12522	-0.206 to -0.054
LPC(22:5) [sn1] (n3)/LPC(22:5) [sn2] (n6)		-0.124034	-0.201 to -0.047	0.00178248	0.00702133	-0.123206	-0.201 to -0.04
LPC(22:5) [sn1] (n6)		-0.0864612	-0.168 to -0.005	0.0387164	0.0805467	-0.0859273	-0.164 to -0.021
LPC(22:5) [sn2] (n3)		-0.137094	-0.218 to -0.056	0.00103064	0.00462307	-0.134376	-0.22 to -0.055
LPC(22:6) [sn1]		-0.077267	-0.155 to 0	0.0507755	0.0992971	-0.0774551	-0.154 to -0.006
LPC(22:6) [sn2]		-0.0846526	-0.164 to -0.005	0.0367107	0.0776227	-0.0851663	-0.157 to -0.007
LPC(24:0) [sn1]		-0.262094	-0.354 to -0.17	4.25398e-08	1.22263e-06	-0.261232	-0.356 to -0.174
LPC(24:0) [sn2]		-0.271042	-0.362 to -0.18	1.04639e-08	5.5048e-07	-0.270595	-0.355 to -0.19
LPC(26:0) [sn1]		-0.129692	-0.218 to -0.042	0.00406748	0.013318	-0.126747	-0.217 to -0.042
LPC(26:0) [sn2]		-0.159033	-0.246 to -0.072	0.000380061	0.00207695	-0.159924	-0.248 to -0.077
LPC(O-16:0)		-0.0691529	-0.127 to -0.011	0.0201817	0.0486366	-0.0673061	-0.132 to -0.014
LPC(O-18:0)		-0.102503	-0.166 to -0.039	0.00164405	0.00664472	-0.100894	-0.175 to -0.044
LPC(O-18:1)		-0.0174796	-0.072 to 0.037	0.526981	0.627204	-0.0163971	-0.068 to 0.038
LPC(O-20:0)		-0.154034	-0.229 to -0.079	6.10973e-05	0.000474115	-0.154684	-0.234 to -0.072
LPC(O-20:1)		-0.0249977	-0.086 to 0.036	0.423113	0.533013	-0.0237067	-0.087 to 0.035
LPC(O-22:0)		-0.160201	-0.245 to -0.076	0.000222014	0.00130517	-0.162573	-0.247 to -0.071
LPC(O-22:1)		-0.0805003	-0.159 to -0.002	0.0458778	0.0919927	-0.0827401	-0.162 to 0.007
LPC(O-24:0)		-0.126096	-0.211 to -0.041	0.00391616	0.0129317	-0.126653	-0.205 to -0.038
LPC(O-24:1)		-0.0697914	-0.153 to 0.014	0.102101	0.168935	-0.0695308	-0.159 to 0.014
LPC(O-24:2)		-0.0729723	-0.153 to 0.007	0.0758223	0.134418	-0.0710247	-0.148 to 0.007
LPC(P-16:0)		-0.163564	-0.222 to -0.105	7.08114e-08	1.77257e-06	-0.160754	-0.24 to -0.106
LPC(P-17:0) (a)		-0.167081	-0.233 to -0.101	1.11286e-06	1.62939e-05	-0.166295	-0.235 to -0.107
LPC(P-17:0) (b)		-0.15902	-0.221 to -0.097	7.7202e-07	1.18849e-05	-0.157481	-0.226 to -0.103
LPC(P-18:0)		-0.171166	-0.235 to -0.108	1.98353e-07	4.05057e-06	-0.171619	-0.24 to -0.105
LPC(P-18:1)		-0.125824	-0.182 to -0.069	1.52222e-05	0.000146815	-0.123196	-0.186 to -0.07
LPC(P-20:0)		-0.240964	-0.317 to -0.165	1.19584e-09	1.32568e-07	-0.241295	-0.312 to -0.167
PE(15-MHDA_18:1)		-0.0838386	-0.176 to 0.008	0.0750844	0.134418	-0.0851229	-0.171 to -0.003
PE(15-MHDA_18:2)		-0.111667	-0.205 to -0.019	0.0192083	0.046709	-0.113294	-0.205 to -0.015
PE(15-MHDA_20:4)		-0.0564588	-0.144 to 0.031	0.208186	0.301967	-0.0560229	-0.136 to 0.027
PE(15-MHDA_22:6)		-0.0616012	-0.146 to 0.023	0.154355	0.239081	-0.0616418	-0.14 to 0.027
PE(16:0_16:0)		-0.0967231	-0.188 to -0.005	0.0385266	0.0803672	-0.0961818	-0.183 to -0.006
PE(16:0_16:1)		-0.0074199	-0.1 to 0.085	0.875058	0.910576	-0.00996644	-0.094 to 0.083
PE(16:0_18:1)		-0.0307511	-0.121 to 0.059	0.502843	0.606852	-0.0307741	-0.115 to 0.058
PE(16:0_18:2)		-0.071915	-0.159 to 0.016	0.10813	0.174486	-0.0728548	-0.169 to 0.015
PE(16:0_18:3) (a)		-0.0686236	-0.156 to 0.019	0.126335	0.200894	-0.0698047	-0.147 to 0.022
PE(16:0_18:3) (b)		-0.0214446	-0.111 to 0.068	0.637198	0.731091	-0.022772	-0.103 to 0.069
PE(16:0_20:3)		-0.0967359	-0.19 to -0.004	0.042479	0.0867467	-0.096748	-0.187 to -0.008
PE(16:0_20:4)		0.00882597	-0.074 to 0.092	0.835094	0.881677	0.00730477	-0.073 to 0.09
PE(16:0_20:5)		-0.0319575	-0.121 to 0.057	0.480901	0.584921	-0.0315338	-0.118 to 0.055
PE(16:0_22:6)		0.0895304	0.012 to 0.167	0.0237941	0.0557746	0.0880952	0.015 to 0.165
PE(16:1_18:2)		-0.120057	-0.214 to -0.026	0.0124413	0.0329503	-0.121269	-0.21 to -0.027
PE(16:1_20:4)		-0.090132	-0.178 to -0.002	0.045403	0.0915136	-0.0902511	-0.176 to -0.007
PE(17:0_18:1)		-0.0896227	-0.181 to 0.002	0.0564025	0.108337	-0.0893782	-0.175 to -0.004
PE(17:0_18:2)		-0.119351	-0.211 to -0.028	0.0107059	0.0289471	-0.122291	-0.198 to -0.024
PE(17:0_20:4)		-0.0329175	-0.118 to 0.052	0.450135	0.558887	-0.0332912	-0.11 to 0.043
PE(17:0_22:6)		-0.00978751	-0.09 to 0.07	0.810145	0.861196	-0.00953588	-0.092 to 0.065
PE(18:0_18:1)		-0.116452	-0.207 to -0.025	0.0125057	0.0330082	-0.114738	-0.21 to -0.032
PE(18:0_18:2)		-0.118699	-0.209 to -0.029	0.0101451	0.0278184	-0.117292	-0.203 to -0.033
PE(18:0_20:3) (a)		-0.0479154	-0.137 to 0.042	0.294651	0.396669	-0.0494269	-0.138 to 0.04
PE(18:0_20:3) (b)		0.00254444	-0.09 to 0.095	0.957018	0.970735	0.00124046	-0.091 to 0.102
PE(18:0_20:4)		-0.00772475	-0.095 to 0.08	0.86244	0.900744	-0.00691779	-0.089 to 0.074
PE(18:0_22:4)		-0.017509	-0.107 to 0.072	0.701544	0.785567	-0.016784	-0.101 to 0.061
PE(18:0_22:5) (n3)		-0.0259948	-0.115 to 0.063	0.567919	0.663712	-0.0235549	-0.119 to 0.063
PE(18:0_22:5) (n6)		0.0132196	-0.073 to 0.099	0.763133	0.827294	0.0109185	-0.067 to 0.107
PE(18:0_22:6)		0.0514107	-0.028 to 0.131	0.204232	0.296787	0.0510345	-0.031 to 0.117
PE(18:1_18:1)		-0.124111	-0.215 to -0.033	0.00767856	0.0220687	-0.124488	-0.209 to -0.037
PE(18:1_18:2)		-0.153352	-0.242 to -0.065	0.000774123	0.00373118	-0.15308	-0.237 to -0.073
PE(18:1_22:6) (a)		-0.0679165	-0.155 to 0.019	0.127041	0.201603	-0.0683598	-0.155 to 0.017
PE(18:1_22:6) (b)		-0.0254867	-0.112 to 0.061	0.56602	0.663135	-0.0256878	-0.111 to 0.06
PE(20:0_20:4)		-0.114116	-0.193 to -0.035	0.0050194	0.0157695	-0.115602	-0.191 to -0.032
PE(36:0)		-0.0156964	-0.109 to 0.078	0.742582	0.817354	-0.018955	-0.105 to 0.087
PE(38:5) (a)		-0.0764003	-0.164 to 0.011	0.0886761	0.15224	-0.0753185	-0.157 to 0.007
PE(38:5) (b)		-0.041544	-0.13 to 0.047	0.357208	0.464311	-0.0417469	-0.129 to 0.044
PE(O-16:0/18:2)		-0.297913	-0.386 to -0.21	8.39159e-11	3.25594e-08	-0.296452	-0.389 to -0.213
PE(O-16:0/20:3)		-0.219071	-0.308 to -0.13	2.08461e-06	2.838e-05	-0.220138	-0.305 to -0.128
PE(O-16:0/20:4)		-0.261135	-0.349 to -0.173	1.19503e-08	5.79589e-07	-0.258767	-0.345 to -0.189
PE(O-16:0/22:4)		-0.150469	-0.24 to -0.061	0.00102199	0.00462307	-0.150706	-0.233 to -0.058
PE(O-16:0/22:6)		-0.214018	-0.295 to -0.133	3.18817e-07	5.89053e-06	-0.214201	-0.29 to -0.128
PE(O-18:0/20:4)		-0.206109	-0.292 to -0.121	3.0827e-06	3.9216e-05	-0.20625	-0.293 to -0.127
PE(O-18:0/22:5)		-0.168177	-0.255 to -0.081	0.000179697	0.00108942	-0.166996	-0.253 to -0.078
PE(O-18:0/22:6)		-0.201367	-0.278 to -0.124	4.52673e-07	7.8061e-06	-0.204265	-0.272 to -0.127
PE(O-18:1/18:2)		-0.279095	-0.365 to -0.193	4.33345e-10	8.4069e-08	-0.27689	-0.358 to -0.201
PE(O-18:1/22:6)		-0.155256	-0.233 to -0.077	0.000107384	0.000730967	-0.154815	-0.225 to -0.08
PE(O-34:1)		-0.252598	-0.339 to -0.167	1.6421e-08	6.37134e-07	-0.253757	-0.343 to -0.171
PE(O-36:5)		-0.235207	-0.324 to -0.147	2.82798e-07	5.35248e-06	-0.237979	-0.316 to -0.149
PE(O-38:5) (a)		-0.219801	-0.307 to -0.133	1.02874e-06	1.5352e-05	-0.219824	-0.305 to -0.136
PE(O-38:5) (b)		-0.211816	-0.301 to -0.123	3.97784e-06	4.89969e-05	-0.212544	-0.306 to -0.133
PE(P-15:0/20:4) (a)		0.0176106	-0.067 to 0.102	0.684258	0.770528	0.0192553	-0.069 to 0.099
PE(P-15:0/20:4) (b)		-0.0470041	-0.136 to 0.042	0.302047	0.404815	-0.0475894	-0.142 to 0.047
PE(P-15:0/22:6) (a)		-0.00230443	-0.088 to 0.084	0.958226	0.970735	-0.00393085	-0.083 to 0.078
PE(P-15:0/22:6) (b)		-0.0999183	-0.186 to -0.014	0.0227801	0.0538945	-0.0990212	-0.192 to -0.02
PE(P-16:0/18:1)		-0.102547	-0.194 to -0.011	0.0285526	0.0638526	-0.0995285	-0.209 to -0.016
PE(P-16:0/18:2)		-0.175008	-0.264 to -0.086	0.000141791	0.000909336	-0.17201	-0.272 to -0.092
PE(P-16:0/18:3)		-0.143234	-0.236 to -0.05	0.00266556	0.00971115	-0.145631	-0.243 to -0.035
PE(P-16:0/20:3) (a)		-0.169289	-0.259 to -0.08	0.00024661	0.00142621	-0.170011	-0.266 to -0.07
PE(P-16:0/20:3) (b)		-0.155933	-0.248 to -0.063	0.00103066	0.00462307	-0.157294	-0.259 to -0.053
PE(P-16:0/20:4)		-0.12828	-0.215 to -0.042	0.00384459	0.012852	-0.127138	-0.209 to -0.045
PE(P-16:0/20:5)		-0.130056	-0.217 to -0.043	0.00368049	0.0124176	-0.127449	-0.219 to -0.052
PE(P-16:0/22:4)		-0.10753	-0.188 to -0.028	0.00871606	0.024506	-0.105587	-0.186 to -0.04
PE(P-16:0/22:5) (n3)		-0.124414	-0.217 to -0.032	0.00857857	0.0242072	-0.123672	-0.219 to -0.019
PE(P-16:0/22:5) (n6)		-0.0840851	-0.171 to 0.003	0.0584505	0.110146	-0.084338	-0.16 to -0.011
PE(P-16:0/22:6)		-0.11429	-0.195 to -0.034	0.00552899	0.0170936	-0.115567	-0.183 to -0.036
PE(P-17:0/20:4) (a)		-0.0931323	-0.176 to -0.01	0.0279178	0.0627947	-0.0911314	-0.181 to -0.015
PE(P-17:0/20:4) (b)		-0.142985	-0.226 to -0.06	0.000795469	0.0038104	-0.139117	-0.229 to -0.068
PE(P-17:0/22:6) (a)		-0.104736	-0.179 to -0.031	0.00582461	0.017883	-0.105777	-0.177 to -0.034
PE(P-17:0/22:6) (b)		-0.117459	-0.193 to -0.042	0.00246744	0.00908797	-0.118096	-0.193 to -0.048
PE(P-18:0/18:1)		-0.105013	-0.197 to -0.013	0.0264789	0.0600807	-0.105247	-0.202 to -0.014
PE(P-18:0/18:2)		-0.176611	-0.267 to -0.086	0.000144348	0.000918147	-0.177397	-0.265 to -0.087
PE(P-18:0/18:3)		-0.133131	-0.226 to -0.04	0.0054183	0.0168184	-0.133384	-0.243 to -0.031
PE(P-18:0/20:3) (a)		-0.142681	-0.232 to -0.054	0.00177265	0.00701823	-0.141968	-0.242 to -0.044
PE(P-18:0/20:3) (b)		-0.133864	-0.224 to -0.043	0.00391562	0.0129317	-0.133421	-0.231 to -0.035
PE(P-18:0/20:4)		-0.110279	-0.194 to -0.026	0.0102283	0.0279478	-0.110043	-0.186 to -0.038
PE(P-18:0/20:5)		-0.117524	-0.203 to -0.032	0.00728043	0.0211954	-0.115866	-0.206 to -0.029
PE(P-18:0/22:4)		-0.0997251	-0.179 to -0.021	0.0136144	0.0352412	-0.0991037	-0.172 to -0.033
PE(P-18:0/22:5) (n3)		-0.120942	-0.209 to -0.033	0.00729276	0.0211954	-0.120444	-0.213 to -0.033
PE(P-18:0/22:5) (n6)		-0.0811222	-0.17 to 0.008	0.0755458	0.134418	-0.0823245	-0.161 to 0.002
PE(P-18:0/22:6)		-0.100035	-0.176 to -0.024	0.010615	0.0288438	-0.0981989	-0.172 to -0.033
PE(P-18:1/18:1)		-0.151362	-0.238 to -0.065	0.000663027	0.00327445	-0.151167	-0.243 to -0.076
PE(P-18:1/18:1) (a)		-0.16531	-0.251 to -0.08	0.000173244	0.00105856	-0.164667	-0.248 to -0.076
PE(P-18:1/18:1) (b)		-0.0687731	-0.16 to 0.023	0.141199	0.220908	-0.0684223	-0.166 to 0.022
PE(P-18:1/18:2) (a)		-0.195281	-0.282 to -0.108	1.38886e-05	0.00014181	-0.190448	-0.287 to -0.114
PE(P-18:1/18:2) (b)		-0.132382	-0.226 to -0.039	0.00593474	0.0181006	-0.13152	-0.225 to -0.045
PE(P-18:1/18:3)		-0.184476	-0.28 to -0.089	0.000186992	0.00112485	-0.181867	-0.28 to -0.068
PE(P-18:1/20:3) (a)		-0.179126	-0.267 to -0.091	7.6893e-05	0.000562915	-0.179404	-0.271 to -0.1
PE(P-18:1/20:3) (b)		-0.119928	-0.212 to -0.028	0.011092	0.0297833	-0.118953	-0.214 to -0.028
PE(P-18:1/20:4) (a)		-0.13171	-0.218 to -0.045	0.00293717	0.0104075	-0.130376	-0.215 to -0.047
PE(P-18:1/20:4) (b)		-0.0784444	-0.165 to 0.008	0.0765429	0.135301	-0.0771668	-0.16 to 0
PE(P-18:1/20:5) (a)		-0.15238	-0.238 to -0.067	0.000547277	0.00275771	-0.151543	-0.245 to -0.069
PE(P-18:1/20:5) (b)		-0.0846588	-0.174 to 0.005	0.0647547	0.119075	-0.0827609	-0.181 to 0.001
PE(P-18:1/22:4)		-0.137175	-0.223 to -0.051	0.00187596	0.00724187	-0.136347	-0.214 to -0.055
PE(P-18:1/22:5) (a)		-0.133253	-0.22 to -0.046	0.0028826	0.0102753	-0.131271	-0.225 to -0.057
PE(P-18:1/22:5) (b)		-0.109641	-0.198 to -0.021	0.0156586	0.03958	-0.10877	-0.191 to -0.035
PE(P-18:1/22:6) (a)		-0.0758437	-0.154 to 0.003	0.0589307	0.110146	-0.0760847	-0.151 to 0.008
PE(P-18:1/22:6) (b)		-0.077452	-0.157 to 0.002	0.0568671	0.108804	-0.0752619	-0.158 to -0.012
PE(P-19:0/20:4) (a)		-0.0461459	-0.13 to 0.038	0.280299	0.384296	-0.0422148	-0.132 to 0.031
PE(P-19:0/20:4) (b)		-0.0887416	-0.175 to -0.002	0.0455897	0.0916519	-0.0875964	-0.18 to -0.012
PE(P-20:0/18:1)		-0.0857592	-0.178 to 0.006	0.0686199	0.124998	-0.0852617	-0.181 to 0.008
PE(P-20:0/18:2)		-0.155145	-0.245 to -0.065	0.000810715	0.0038596	-0.152815	-0.241 to -0.07
PE(P-20:0/20:4)		-0.051994	-0.138 to 0.034	0.238432	0.337634	-0.0521982	-0.127 to 0.019
PE(P-20:0/22:6)		-0.00565545	-0.089 to 0.078	0.894401	0.924174	-0.00884927	-0.08 to 0.069
PE(P-20:1/20:4)		0.0615145	-0.033 to 0.156	0.204036	0.296787	0.0610782	-0.038 to 0.152
PE(P-20:1/22:6)		0.0718846	-0.013 to 0.157	0.0979599	0.163126	0.07144	-0.014 to 0.165
LPE(16:0) [sn1]		-0.226106	-0.304 to -0.148	2.20808e-08	7.7885e-07	-0.225352	-0.311 to -0.151
LPE(16:0) [sn2]		-0.220921	-0.299 to -0.143	5.63076e-08	1.50671e-06	-0.222311	-0.297 to -0.135
LPE(17:0) [sn1]		-0.138307	-0.216 to -0.06	0.000544896	0.00275771	-0.138785	-0.219 to -0.057
LPE(17:0) [sn2]		-0.200062	-0.284 to -0.116	4.30692e-06	5.22214e-05	-0.198828	-0.283 to -0.126
LPE(18:0) [sn1]		-0.158007	-0.227 to -0.089	8.78207e-06	9.73555e-05	-0.156452	-0.23 to -0.094
LPE(18:0) [sn2]		-0.176904	-0.247 to -0.107	1.14232e-06	1.64156e-05	-0.175896	-0.247 to -0.108
LPE(18:1) [sn1]		-0.168734	-0.253 to -0.084	0.000103382	0.000709954	-0.168064	-0.247 to -0.086
LPE(18:1) [sn2]		-0.172727	-0.26 to -0.086	0.000112934	0.000762061	-0.170511	-0.256 to -0.093
LPE(18:2) [sn1]		-0.246979	-0.334 to -0.16	4.77862e-08	1.32436e-06	-0.243998	-0.323 to -0.162
LPE(18:2) [sn2]		-0.252744	-0.341 to -0.164	3.58302e-08	1.16373e-06	-0.248733	-0.348 to -0.178
LPE(20:4) [sn1]		-0.0774794	-0.167 to 0.012	0.089385	0.152781	-0.0786837	-0.155 to 0.017
LPE(20:4) [sn2]		-0.0919395	-0.18 to -0.004	0.0407121	0.0837609	-0.0917148	-0.17 to -0.005
LPE(22:6) [sn1]		-0.098452	-0.183 to -0.013	0.0236657	0.0556503	-0.0989752	-0.175 to -0.016
LPE(22:6) [sn2]		-0.0750767	-0.162 to 0.011	0.0895892	0.152794	-0.0751612	-0.164 to 0.007
LPE(P-16:0)		-0.0749196	-0.137 to -0.013	0.0185074	0.0451627	-0.0728945	-0.148 to -0.02
LPE(P-18:0)		-0.103863	-0.168 to -0.04	0.00150324	0.00613955	-0.102213	-0.168 to -0.045
LPE(P-18:1)		-0.0590505	-0.122 to 0.004	0.067258	0.123095	-0.0614823	-0.122 to 0.004
LPE(P-20:0)		-0.121549	-0.195 to -0.048	0.00128614	0.00542352	-0.121307	-0.197 to -0.05
PI (38:5) (b)		-0.147301	-0.238 to -0.056	0.00161593	0.00656526	-0.145474	-0.237 to -0.071
PI(15-MHDA_20:4)\PI(17:0_20:4)		-0.195691	-0.285 to -0.107	2.06777e-05	0.000184435	-0.196946	-0.278 to -0.111
PI(16:0_16:1)		0.0455792	-0.044 to 0.135	0.31782	0.420868	0.0441542	-0.04 to 0.137
PI(16:0_20:3) (a)		-0.191903	-0.284 to -0.1	5.30702e-05	0.000420229	-0.192035	-0.28 to -0.1
PI(16:0_20:3) (b)		-0.152123	-0.241 to -0.063	0.000890364	0.00413726	-0.152067	-0.244 to -0.064
PI(16:0_20:4)		-0.192894	-0.286 to -0.1	5.59492e-05	0.000438551	-0.193179	-0.281 to -0.095
PI(16:0/16:0)		0.0154611	-0.073 to 0.104	0.732249	0.811732	0.0165468	-0.075 to 0.11
PI(17:0_18:1)		-0.00031479	-0.092 to 0.091	0.994614	0.997184	-0.00201152	-0.102 to 0.091
PI(17:0_18:2)		-0.036801	-0.128 to 0.054	0.428276	0.537771	-0.0356499	-0.132 to 0.061
PI(18:0_18:1)		-0.136192	-0.227 to -0.045	0.00347935	0.011842	-0.13693	-0.224 to -0.049
PI(18:0_20:2)		-0.280082	-0.368 to -0.192	9.36514e-10	1.21122e-07	-0.278897	-0.362 to -0.201
PI(18:0_20:3) (a)		-0.181366	-0.262 to -0.101	1.27984e-05	0.000134211	-0.180554	-0.26 to -0.097
PI(18:0_20:3) (b)		-0.184505	-0.271 to -0.098	3.32847e-05	0.000274582	-0.183686	-0.269 to -0.1
PI(18:0_20:4)		-0.241177	-0.328 to -0.154	9.65709e-08	2.20409e-06	-0.240883	-0.325 to -0.165
PI(18:0_22:4)		-0.16933	-0.258 to -0.08	0.000221193	0.00130517	-0.170732	-0.259 to -0.077
PI(18:0_22:5) (n3)		-0.0865683	-0.172 to -0.002	0.0465556	0.0925751	-0.0847479	-0.177 to -0.005
PI(18:0_22:5) (n6)		-0.0467736	-0.134 to 0.041	0.294946	0.396669	-0.0485438	-0.133 to 0.032
PI(18:0_22:6)		-0.00224914	-0.082 to 0.078	0.955986	0.970735	-0.000815668	-0.084 to 0.072
PI(18:1_18:2)		-0.134728	-0.225 to -0.045	0.00355463	0.0120454	-0.135402	-0.217 to -0.044
PI(20:0_20:4)		-0.189333	-0.282 to -0.096	7.67711e-05	0.000562915	-0.189287	-0.272 to -0.099
PI(34:0)		-0.0150256	-0.103 to 0.073	0.739123	0.814715	-0.0128048	-0.114 to 0.076
PI(34:1)		-0.025972	-0.117 to 0.065	0.574206	0.670037	-0.0256732	-0.122 to 0.072
PI(36:2)		-0.0520127	-0.144 to 0.04	0.26733	0.369783	-0.0528525	-0.14 to 0.043
PI(37:6)		-0.193797	-0.281 to -0.107	1.5514e-05	0.000146815	-0.193326	-0.274 to -0.103
PI(38:5) (a)		-0.129768	-0.224 to -0.036	0.00707248	0.0207888	-0.129916	-0.228 to -0.038
PI(38:6)		0.0502382	-0.033 to 0.134	0.237987	0.33762	0.0496286	-0.025 to 0.137
PI(39:6)		-0.0015989	-0.086 to 0.083	0.970315	0.977876	-0.00426316	-0.078 to 0.08
PIP1(38:4)		-0.131304	-0.218 to -0.045	0.00308042	0.0106714	-0.133974	-0.218 to -0.053
LPI(18:0) [sn1]		-0.0705676	-0.156 to 0.015	0.106004	0.173308	-0.0727617	-0.157 to 0.012
LPI(18:0) [sn2]		-0.13737	-0.228 to -0.047	0.00298509	0.0104816	-0.136336	-0.228 to -0.034
LPI(18:1) [sn1]		-0.0395229	-0.129 to 0.05	0.384872	0.490411	-0.0381338	-0.131 to 0.038
LPI(18:1) [sn2]		-0.0122156	-0.105 to 0.08	0.795847	0.853007	-0.0112849	-0.116 to 0.076
LPI(18:2) [sn1]		0.0644245	-0.027 to 0.156	0.16696	0.253543	0.0649587	-0.018 to 0.158
LPI(18:2) [sn2]		0.0288309	-0.063 to 0.121	0.53986	0.640568	0.0292539	-0.059 to 0.112
LPI(20:4) [sn1]		0.0393999	-0.052 to 0.131	0.397644	0.504203	0.0405993	-0.05 to 0.128
LPI(20:4) [sn2]		-0.0776969	-0.169 to 0.013	0.0956242	0.159923	-0.0744962	-0.176 to 0.007
PS(36:1)		0.0671977	-0.004 to 0.139	0.0656354	0.120409	0.0663943	-0.013 to 0.134
PS(36:2)		0.0720076	0.005 to 0.139	0.0359643	0.076874	0.0715076	0.001 to 0.141
PS(38:3)		0.0173267	-0.054 to 0.089	0.635558	0.730657	0.0175286	-0.057 to 0.087
PS(38:4)		0.00524738	-0.063 to 0.074	0.880632	0.914028	0.00361736	-0.072 to 0.078
PS(38:5)		0.0151327	-0.058 to 0.088	0.685135	0.770528	0.016621	-0.069 to 0.09
PS(40:5)		0.0245635	-0.05 to 0.099	0.5194	0.621997	0.0247091	-0.059 to 0.103
PS(40:6)		-0.0118757	-0.093 to 0.069	0.774453	0.834689	-0.0146838	-0.118 to 0.078
PG(34:1)		-0.12487	-0.215 to -0.035	0.0066234	0.0198028	-0.124777	-0.213 to -0.04
PG(36:1)		-0.126756	-0.214 to -0.04	0.00442324	0.0143018	-0.129023	-0.21 to -0.029
PG(36:2)		-0.042223	-0.133 to 0.049	0.362275	0.468074	-0.0426682	-0.13 to 0.06
CE(14:0)		0.000348666	-0.091 to 0.092	0.994055	0.997184	-0.000909666	-0.096 to 0.096
CE(15:0)		0.00387633	-0.087 to 0.095	0.933588	0.953243	1.27059e-05	-0.09 to 0.095
CE(16:0)		-0.102025	-0.194 to -0.01	0.0298472	0.0663651	-0.100077	-0.21 to -0.013
CE(16:1)		-0.0120852	-0.101 to 0.077	0.790339	0.849436	-0.0124002	-0.103 to 0.087
CE(16:2)		-0.0448539	-0.138 to 0.048	0.346796	0.452292	-0.0421012	-0.148 to 0.041
CE(17:0)		-0.104644	-0.194 to -0.016	0.0215026	0.0513417	-0.10162	-0.197 to -0.012
CE(17:1)		-0.0135583	-0.102 to 0.075	0.765041	0.827995	-0.0131582	-0.114 to 0.073
CE(18:0)		-0.137639	-0.224 to -0.051	0.0019372	0.00740527	-0.135699	-0.232 to -0.054
CE(18:1)		-0.113763	-0.2 to -0.028	0.00988066	0.0272861	-0.115067	-0.206 to -0.022
CE(18:2)		-0.142845	-0.24 to -0.046	0.0040108	0.013188	-0.14453	-0.239 to -0.045
CE(18:3)		-0.0358614	-0.131 to 0.06	0.461735	0.567838	-0.0367792	-0.134 to 0.052
CE(20:0)		-0.114651	-0.197 to -0.032	0.00688713	0.020321	-0.115561	-0.195 to -0.029
CE(20:1)		-0.11465	-0.197 to -0.032	0.006686	0.0198028	-0.113635	-0.203 to -0.033
CE(20:2)		-0.0944695	-0.182 to -0.007	0.0358439	0.0768366	-0.0931538	-0.196 to -0.007
CE(20:3)		0.0318546	-0.058 to 0.121	0.486187	0.590424	0.0335498	-0.06 to 0.121
CE(20:4)		0.00611644	-0.082 to 0.095	0.89236	0.923295	0.00860844	-0.083 to 0.093
CE(20:5)		-0.00531541	-0.092 to 0.081	0.904136	0.930517	-0.00401955	-0.091 to 0.078
CE(22:0)		-0.115052	-0.2 to -0.03	0.00802302	0.0229737	-0.115019	-0.202 to -0.022
CE(22:1)		-0.0587871	-0.143 to 0.026	0.172713	0.261258	-0.0596374	-0.147 to 0.032
CE(22:4)		0.0760511	-0.016 to 0.168	0.106145	0.173308	0.0763504	-0.01 to 0.167
CE(22:5) (n3)		0.00749888	-0.083 to 0.098	0.870706	0.908156	0.00775023	-0.079 to 0.104
CE(22:5) (n6)		0.0168974	-0.073 to 0.107	0.7135	0.795512	0.0159934	-0.066 to 0.112
CE(22:6)		-0.0150572	-0.105 to 0.075	0.743624	0.817354	-0.0136489	-0.105 to 0.089
CE(24:0)		-0.168293	-0.251 to -0.086	7.78193e-05	0.000564372	-0.168644	-0.261 to -0.092
CE(24:1)		-0.085242	-0.171 to 0	0.0508662	0.0992971	-0.0907563	-0.16 to 0.016
CE(24:4)		-0.109605	-0.193 to -0.027	0.00997716	0.0274549	-0.110045	-0.186 to -0.038
CE(24:5)		-0.136204	-0.222 to -0.05	0.00210108	0.00795336	-0.135423	-0.215 to -0.058
CE(24:6)		-0.0685331	-0.16 to 0.023	0.142819	0.222994	-0.0717322	-0.159 to 0.026
COH		-0.0492328	-0.139 to 0.041	0.284859	0.387669	-0.0525479	-0.149 to 0.054
DE(16:0)		-0.0794939	-0.172 to 0.013	0.0929718	0.155823	-0.0787541	-0.168 to 0.008
DE(18:1)		-0.0749852	-0.165 to 0.015	0.101763	0.168917	-0.0759528	-0.169 to 0.018
DE(18:2)		-0.129805	-0.225 to -0.035	0.00761274	0.0219609	-0.127178	-0.235 to -0.038
DE(20:4)		-0.0111496	-0.102 to 0.08	0.809876	0.861196	-0.0130766	-0.104 to 0.084
DE(20:5)		0.00833661	-0.082 to 0.098	0.856119	0.896557	0.00956875	-0.079 to 0.096
DE(22:6)		-0.0615701	-0.147 to 0.024	0.157529	0.242065	-0.0607927	-0.156 to 0.026
FA(14:0)		-0.0371996	-0.119 to 0.045	0.373466	0.481411	-0.0380342	-0.112 to 0.05
FA(15:0)		-0.0318386	-0.119 to 0.055	0.47307	0.578114	-0.0310582	-0.118 to 0.071
FA(16:0)		-0.0154141	-0.088 to 0.057	0.676055	0.764778	-0.0159869	-0.085 to 0.046
FA(16:1)		0.0131745	-0.067 to 0.094	0.748657	0.82172	0.0141232	-0.071 to 0.088
FA(16:2)		-0.0396425	-0.135 to 0.055	0.41329	0.521485	-0.0411252	-0.13 to 0.056
FA(17:0)		-0.0663613	-0.159 to 0.027	0.162685	0.248023	-0.0645482	-0.167 to 0.031
FA(17:1)		-0.0494496	-0.137 to 0.038	0.270791	0.373903	-0.0473772	-0.144 to 0.042
FA(18:0)		-0.0469802	-0.141 to 0.047	0.330127	0.433466	-0.0452971	-0.132 to 0.038
FA(18:1)		-0.0188367	-0.099 to 0.061	0.64328	0.735177	-0.0185055	-0.099 to 0.066
FA(18:2)		-0.0445575	-0.12 to 0.03	0.244928	0.34432	-0.0449222	-0.113 to 0.031
FA(18:3)		-0.0652616	-0.141 to 0.011	0.0924314	0.155253	-0.0665617	-0.144 to 0.013
FA(20:2)		-0.104428	-0.188 to -0.021	0.0149695	0.0383378	-0.102674	-0.185 to -0.028
FA(20:3)		-0.0590537	-0.142 to 0.024	0.162443	0.248023	-0.0575515	-0.141 to 0.017
FA(20:4)		-0.0682592	-0.151 to 0.014	0.106307	0.173308	-0.0706075	-0.145 to 0.009
FA(20:5)		-0.0810262	-0.168 to 0.006	0.06923	0.125814	-0.082971	-0.163 to 0.004
FA(22:4)		-0.0437364	-0.129 to 0.042	0.317455	0.420868	-0.0423895	-0.125 to 0.033
FA(22:5)		-0.095202	-0.176 to -0.015	0.0206793	0.0496815	-0.0948977	-0.194 to -0.02
FA(22:6)		-0.0797211	-0.155 to -0.004	0.0393501	0.0812119	-0.0789857	-0.153 to -0.012
AC(12:0)		0.0788624	-0.011 to 0.169	0.0876595	0.151164	0.0783974	-0.004 to 0.174
AC(13:0)		0.0153572	-0.071 to 0.101	0.726174	0.806168	0.0144551	-0.065 to 0.1
AC(14:0)		0.000659087	-0.071 to 0.073	0.9857	0.990808	0.00165641	-0.068 to 0.07
AC(14:1)		0.0967156	0.006 to 0.187	0.0362305	0.076874	0.0956021	0.006 to 0.184
AC(14:2)		0.0666832	-0.024 to 0.157	0.149151	0.231947	0.0672024	-0.021 to 0.163
AC(15:0) (a)		-0.0432428	-0.125 to 0.039	0.303302	0.405797	-0.0407416	-0.129 to 0.035
AC(15:0) (b)		-0.0268484	-0.097 to 0.044	0.4555	0.563745	-0.0246936	-0.098 to 0.033
AC(16:0)		-0.0403516	-0.1 to 0.019	0.183649	0.273011	-0.0396342	-0.097 to 0.014
AC(16:1)		0.0443026	-0.027 to 0.115	0.221846	0.319392	0.0421106	-0.016 to 0.119
AC(17:0) (a)		-0.0712223	-0.144 to 0.001	0.0543364	0.104628	-0.0710504	-0.137 to 0.006
AC(17:0) (b)		-0.112336	-0.181 to -0.044	0.0013624	0.00559376	-0.111198	-0.186 to -0.042
AC(18:0)		-0.126969	-0.19 to -0.064	9.76482e-05	0.000688864	-0.126881	-0.194 to -0.069
AC(18:1)		-0.0285852	-0.085 to 0.028	0.322056	0.423585	-0.0270758	-0.088 to 0.023
AC(18:2)		-0.0679685	-0.119 to -0.017	0.00953581	0.0265225	-0.0672041	-0.125 to -0.021
DG(14:0_16:0)		-0.105635	-0.2 to -0.011	0.0284994	0.0638526	-0.102834	-0.196 to -0.017
DG(14:0_18:2)		-0.139154	-0.229 to -0.05	0.00247108	0.00908797	-0.132698	-0.23 to -0.059
DG(16:0_16:0)		-0.0641699	-0.156 to 0.027	0.170672	0.258674	-0.0627541	-0.156 to 0.017
DG(16:0_16:1)		-0.0467059	-0.137 to 0.043	0.308904	0.411166	-0.0461453	-0.135 to 0.042
DG(16:0_18:1)		-0.0519039	-0.139 to 0.035	0.243995	0.34432	-0.051641	-0.145 to 0.033
DG(16:0_18:2)		-0.0555678	-0.141 to 0.03	0.202837	0.296424	-0.0560499	-0.138 to 0.03
DG(16:0_20:4)		0.0105549	-0.075 to 0.096	0.808546	0.861196	0.0121324	-0.068 to 0.103
DG(16:0_22:5)		-0.046783	-0.135 to 0.041	0.297364	0.39923	-0.0450138	-0.146 to 0.035
DG(16:0_22:6)		-0.0241872	-0.105 to 0.057	0.557939	0.656996	-0.0244776	-0.101 to 0.054
DG(16:1_18:1)		-0.0459691	-0.136 to 0.044	0.319685	0.422616	-0.0445648	-0.135 to 0.049
DG(18:0_18:1)		-0.0393092	-0.128 to 0.049	0.384035	0.49015	-0.0377722	-0.143 to 0.039
DG(18:0_18:2)		-0.0593746	-0.146 to 0.027	0.178646	0.267623	-0.0547548	-0.14 to 0.026
DG(18:0_20:4)		0.0553468	-0.018 to 0.128	0.137736	0.21664	0.0561043	-0.018 to 0.128
DG(18:0_22:6)		0.0255689	-0.05 to 0.101	0.505154	0.607752	0.0236938	-0.041 to 0.09
DG(18:1_18:1)		-0.010811	-0.101 to 0.079	0.814418	0.864553	-0.0124941	-0.099 to 0.079
DG(18:1_18:2)		-0.0175269	-0.107 to 0.072	0.70041	0.785431	-0.0171805	-0.102 to 0.067
DG(18:1_18:3)		-0.0626886	-0.15 to 0.025	0.160559	0.245748	-0.0601457	-0.149 to 0.025
DG(18:1_20:3)		-0.0411556	-0.128 to 0.046	0.353594	0.460384	-0.0397903	-0.128 to 0.045
DG(18:1_20:4)		0.0852384	0 to 0.17	0.0503146	0.0988458	0.0838083	-0.001 to 0.174
DG(18:1_20:5)		5.1802e-05	-0.085 to 0.085	0.999045	0.999045	-0.000671149	-0.086 to 0.085
DG(18:1_22:5)		0.0205071	-0.065 to 0.106	0.638185	0.731091	0.0208343	-0.064 to 0.101
DG(18:1_22:6)		0.0408624	-0.04 to 0.121	0.320377	0.422811	0.0412062	-0.042 to 0.123
DG(18:2_18:2)		-0.0336648	-0.122 to 0.054	0.453866	0.56262	-0.0333221	-0.119 to 0.036
DG(18:2_20:4)		0.0426323	-0.043 to 0.129	0.33148	0.433775	0.0443292	-0.039 to 0.125
DG(18:2_22:6)		0.0190329	-0.064 to 0.102	0.654304	0.744487	0.0178988	-0.061 to 0.103
TG(48:0) [SIM]		-0.128378	-0.223 to -0.034	0.00808662	0.0230561	-0.129696	-0.218 to -0.036
TG(48:1) [SIM]		-0.1611	-0.253 to -0.069	0.000621784	0.00309297	-0.16033	-0.253 to -0.074
TG(48:2) [SIM]		-0.164406	-0.255 to -0.074	0.000408929	0.0021587	-0.165389	-0.254 to -0.076
TG(48:3) [SIM]		-0.159567	-0.251 to -0.068	0.000666705	0.00327445	-0.157423	-0.253 to -0.079
TG(49:1) [SIM]		-0.0917662	-0.187 to 0.003	0.0590475	0.110146	-0.0930877	-0.175 to -0.005
TG(50:0) [SIM]		-0.0916372	-0.186 to 0.003	0.0586029	0.110146	-0.0917881	-0.179 to 0.002
TG(50:1) [SIM]		-0.0703839	-0.167 to 0.027	0.156152	0.240553	-0.0718677	-0.158 to 0.018
TG(50:2) [SIM]		-0.0948316	-0.19 to 0	0.0509281	0.0992971	-0.0958678	-0.192 to 0
TG(50:3) [SIM]		-0.108063	-0.201 to -0.015	0.0233475	0.0550689	-0.110307	-0.199 to -0.018
TG(50:4) [SIM]		-0.133347	-0.225 to -0.042	0.00447604	0.0144125	-0.133723	-0.213 to -0.027
TG(51:0) [SIM]		-0.00619599	-0.101 to 0.088	0.897903	0.92656	-0.00676798	-0.093 to 0.083
TG(51:1) [SIM]		-0.0584449	-0.153 to 0.036	0.226319	0.324628	-0.0579236	-0.159 to 0.034
TG(51:2) [SIM]		-0.050281	-0.143 to 0.043	0.289404	0.39057	-0.0497306	-0.137 to 0.041
TG(52:1) [SIM]		-0.0917289	-0.186 to 0.003	0.0576811	0.109977	-0.0945991	-0.183 to 0.014
TG(52:2) [SIM]		0.00209373	-0.095 to 0.099	0.966164	0.976177	0.00509643	-0.101 to 0.099
TG(52:3) [SIM]		0.0109671	-0.086 to 0.108	0.824415	0.87397	0.0143201	-0.08 to 0.097
TG(52:4) [SIM]		-0.0148284	-0.108 to 0.079	0.756227	0.825362	-0.01326	-0.107 to 0.073
TG(52:5) [SIM]		-0.0681631	-0.158 to 0.022	0.137913	0.21664	-0.0653507	-0.163 to 0.017
TG(53:2) [SIM]		-0.0411476	-0.133 to 0.05	0.379161	0.486329	-0.0408199	-0.14 to 0.043
TG(54:0) [SIM]		-0.151827	-0.247 to -0.057	0.00183824	0.00713237	-0.152252	-0.243 to -0.05
TG(54:1) [SIM]		-0.118551	-0.212 to -0.025	0.0136242	0.0352412	-0.118578	-0.211 to -0.023
TG(54:2) [SIM]		-0.0623691	-0.154 to 0.029	0.181106	0.270251	-0.0629365	-0.159 to 0.035
TG(54:3) [SIM]		-0.0397851	-0.132 to 0.053	0.398941	0.505021	-0.0402325	-0.134 to 0.048
TG(54:4) [SIM]		-0.0537695	-0.146 to 0.038	0.252327	0.352168	-0.0522523	-0.138 to 0.033
TG(54:5) [SIM]		-0.0314901	-0.123 to 0.06	0.501767	0.606497	-0.0297619	-0.121 to 0.051
TG(54:6) [SIM]		-0.0607753	-0.151 to 0.03	0.188386	0.279518	-0.0593423	-0.157 to 0.019
TG(54:7) [SIM]		-0.0636081	-0.151 to 0.024	0.153931	0.238901	-0.0632472	-0.159 to 0.016
TG(56:6) [SIM]		0.08725	-0.003 to 0.177	0.0584453	0.110146	0.0887864	0.004 to 0.168
TG(56:7) [SIM]		0.0796352	-0.006 to 0.166	0.0704612	0.127181	0.0794648	-0.002 to 0.161
TG(56:8) [SIM]		0.0348657	-0.052 to 0.122	0.431764	0.540401	0.0338463	-0.048 to 0.114
TG(56:9) [SIM]		-0.0339932	-0.124 to 0.056	0.4601	0.566727	-0.0330468	-0.129 to 0.053
TG(58:10) [SIM]		0.0211346	-0.064 to 0.106	0.627249	0.723247	0.0189003	-0.063 to 0.103
TG(58:8) [SIM]		0.0970899	0.012 to 0.183	0.0266176	0.0602195	0.0970652	0 to 0.183
TG(58:9) [SIM]		0.0490581	-0.037 to 0.136	0.266607	0.369783	0.0503606	-0.045 to 0.13
TG(48:0) [NL-16:0]		-0.0998879	-0.194 to -0.006	0.0376714	0.0792222	-0.100574	-0.196 to -0.006
TG(48:0) [NL-18:0]		-0.144089	-0.239 to -0.049	0.00307167	0.0106714	-0.143926	-0.242 to -0.051
TG(48:1) [NL-16:1]		-0.0975673	-0.189 to -0.006	0.0376362	0.0792222	-0.0989451	-0.186 to -0.01
TG(48:1) [NL-18:1]		-0.165578	-0.257 to -0.074	0.000407235	0.0021587	-0.168891	-0.257 to -0.068
TG(48:2) [NL-14:0]		-0.153894	-0.246 to -0.061	0.00121034	0.00521792	-0.154628	-0.249 to -0.057
TG(48:2) [NL-14:1]		-0.10443	-0.199 to -0.009	0.0317447	0.0697457	-0.106806	-0.188 to -0.01
TG(48:2) [NL-16:1]		-0.0882592	-0.18 to 0.003	0.0589147	0.110146	-0.0872397	-0.179 to 0.013
TG(48:2) [NL-18:2]		-0.158462	-0.252 to -0.065	0.000947779	0.00435193	-0.156059	-0.259 to -0.063
TG(48:3) [NL-14:0]		-0.147399	-0.24 to -0.055	0.00188513	0.00724187	-0.146029	-0.235 to -0.057
TG(48:3) [NL-16:1]		-0.167897	-0.261 to -0.074	0.000478008	0.0024729	-0.168513	-0.254 to -0.074
TG(48:3) [NL-18:3]		-0.148757	-0.241 to -0.056	0.00173491	0.00690921	-0.149311	-0.24 to -0.055
TG(49:1) [NL-16:1]		-0.0771943	-0.171 to 0.017	0.108155	0.174486	-0.0764994	-0.164 to 0.007
TG(49:1) [NL-17:1]		-0.0859329	-0.18 to 0.008	0.0745179	0.133856	-0.0844534	-0.185 to 0
TG(50:0) [NL-18:0]		-0.102366	-0.197 to -0.008	0.0337775	0.0730121	-0.102938	-0.195 to -0.001
TG(50:1) [NL-14:0]		-0.151097	-0.245 to -0.057	0.0018145	0.00708348	-0.151469	-0.251 to -0.056
TG(50:1) [NL-16:0]		-0.0660719	-0.163 to 0.031	0.181444	0.270251	-0.0681858	-0.171 to 0.022
TG(50:1) [NL-18:1]		-0.0848996	-0.182 to 0.012	0.0868723	0.150789	-0.0854452	-0.184 to 0.014
TG(50:2) [NL-14:0]		-0.121379	-0.21 to -0.033	0.00750097	0.0217192	-0.123264	-0.216 to -0.032
TG(50:2) [NL-16:1]		-0.0012225	-0.091 to 0.088	0.978657	0.985004	-0.00231404	-0.08 to 0.092
TG(50:2) [NL-18:1]		-0.0833451	-0.173 to 0.006	0.0677814	0.123761	-0.0840104	-0.183 to 0.003
TG(50:2) [NL-18:2]		-0.123193	-0.22 to -0.027	0.0128683	0.0338502	-0.126286	-0.218 to -0.028
TG(50:3) [NL-14:0]		-0.139814	-0.231 to -0.049	0.00268581	0.00973922	-0.142386	-0.232 to -0.048
TG(50:3) [NL-14:1]		-0.116241	-0.211 to -0.021	0.0165956	0.0415426	-0.117383	-0.211 to -0.024
TG(50:3) [NL-16:1]		-0.0252689	-0.116 to 0.066	0.586065	0.680818	-0.0267213	-0.112 to 0.067
TG(50:3) [NL-18:2]		-0.0822172	-0.174 to 0.01	0.0814469	0.14267	-0.0796447	-0.18 to 0.011
TG(50:3) [NL-18:3]		-0.0875011	-0.184 to 0.009	0.0758697	0.134418	-0.0870891	-0.186 to 0.013
TG(50:4) [NL-14:0]		-0.128609	-0.22 to -0.037	0.00596134	0.0181006	-0.128027	-0.223 to -0.041
TG(50:4) [NL-18:3]		-0.132133	-0.224 to -0.04	0.00523505	0.0163157	-0.133476	-0.227 to -0.041
TG(50:4) [NL-20:4]		-0.0885481	-0.18 to 0.003	0.0583606	0.110146	-0.0895464	-0.177 to 0.003
TG(51:0) [NL-16:0]		-0.0969719	-0.192 to -0.002	0.0466454	0.0925751	-0.0963759	-0.185 to -0.002
TG(51:1) [NL-17:0]		-0.0838733	-0.178 to 0.01	0.0806734	0.141635	-0.0861716	-0.165 to 0.01
TG(51:2) [NL-15:0]		-0.0860144	-0.179 to 0.007	0.07005	0.127007	-0.0880371	-0.172 to 0.006
TG(51:2) [NL-17:0]		-0.0772097	-0.167 to 0.012	0.0915634	0.1548	-0.0758086	-0.163 to 0.01
TG(51:2) [NL-17:1]		-0.0770002	-0.166 to 0.012	0.0924203	0.155253	-0.0758968	-0.174 to 0.013
TG(52:1) [NL-18:0]		-0.0926077	-0.186 to 0.001	0.0532051	0.102704	-0.0918304	-0.186 to -0.009
TG(52:1) [NL-18:1]		-0.0829718	-0.175 to 0.009	0.0788089	0.13899	-0.0846625	-0.167 to 0.013
TG(52:2) [NL-16:0]		0.0632233	-0.032 to 0.159	0.195369	0.287523	0.0608169	-0.035 to 0.151
TG(52:2) [NL-18:2]		-0.124965	-0.221 to -0.029	0.0109605	0.0295325	-0.126189	-0.216 to -0.026
TG(52:3) [NL-16:1]		-0.0367356	-0.127 to 0.054	0.425696	0.535398	-0.0367919	-0.13 to 0.053
TG(52:3) [NL-18:2]		0.0636163	-0.031 to 0.159	0.18987	0.281181	0.0625295	-0.013 to 0.159
TG(52:4) [NL-16:1]		-0.0511575	-0.145 to 0.043	0.285256	0.387669	-0.0478791	-0.139 to 0.034
TG(52:4) [NL-18:2]		0.0049842	-0.088 to 0.097	0.915941	0.941418	0.00654469	-0.087 to 0.078
TG(52:4) [NL-18:3]		-0.0546358	-0.148 to 0.038	0.250735	0.350578	-0.0528989	-0.151 to 0.033
TG(52:5) [NL-18:3]		-0.0582573	-0.148 to 0.031	0.201601	0.295174	-0.0587606	-0.143 to 0.031
TG(52:5) [NL-20:4]		0.00221699	-0.089 to 0.093	0.962051	0.97334	0.00611417	-0.095 to 0.093
TG(52:5) [NL-20:5]		-0.0270597	-0.122 to 0.067	0.575057	0.670037	-0.0284475	-0.115 to 0.072
TG(53:2) [NL-17:1]		-0.0608411	-0.155 to 0.033	0.203895	0.296787	-0.0628818	-0.153 to 0.044
TG(53:2) [NL-18:1]		-0.033891	-0.125 to 0.058	0.467846	0.573536	-0.0334476	-0.131 to 0.051
TG(54:0) [NL-18:0]		-0.133248	-0.228 to -0.039	0.00597133	0.0181006	-0.131316	-0.237 to -0.042
TG(54:1) [NL-18:1]		-0.119704	-0.214 to -0.025	0.0131688	0.0344073	-0.119363	-0.214 to -0.026
TG(54:2) [NL-18:0]		-0.0520732	-0.145 to 0.041	0.273596	0.377105	-0.0530074	-0.154 to 0.04
TG(54:2) [NL-20:1]		-0.0560287	-0.148 to 0.036	0.232033	0.330988	-0.0586859	-0.156 to 0.035
TG(54:3) [NL-18:1]		-0.0556129	-0.15 to 0.039	0.2483	0.347799	-0.0577157	-0.157 to 0.047
TG(54:3) [NL-18:2]		-0.0297043	-0.121 to 0.061	0.522021	0.623213	-0.0305647	-0.118 to 0.056
TG(54:4) [NL-18:2]		-0.0370993	-0.129 to 0.055	0.430538	0.539738	-0.0359916	-0.133 to 0.053
TG(54:4) [NL-20:3]		0.0189447	-0.07 to 0.108	0.676648	0.764778	0.0207177	-0.074 to 0.107
TG(54:5) [NL-18:3]		-0.0608099	-0.152 to 0.03	0.192104	0.283949	-0.0625177	-0.148 to 0.025
TG(54:5) [NL-20:4]		0.179116	0.088 to 0.27	0.000131082	0.00086203	0.176918	0.102 to 0.281
TG(54:6) [NL-18:3]		-0.0843412	-0.174 to 0.005	0.0645387	0.119075	-0.0851714	-0.175 to -0.002
TG(54:6) [NL-20:4]		0.139326	0.047 to 0.231	0.00318825	0.0109473	0.140822	0.055 to 0.226
TG(54:6) [NL-20:5]		0.0388469	-0.05 to 0.128	0.39419	0.500641	0.0370148	-0.053 to 0.128
TG(54:6) [NL-22:6]		0.0381419	-0.047 to 0.123	0.379005	0.486329	0.0355658	-0.037 to 0.118
TG(54:7) [NL-20:5]		-0.0635	-0.155 to 0.028	0.173799	0.262389	-0.0618925	-0.16 to 0.027
TG(54:7) [NL-22:6]		-0.0095036	-0.095 to 0.076	0.827028	0.875544	-0.0113708	-0.088 to 0.08
TG(56:6) [NL-20:4]		0.175709	0.087 to 0.265	0.000122357	0.000818529	0.175745	0.08 to 0.267
TG(56:6) [NL-22:5](a)		0.0977679	0.013 to 0.183	0.0250905	0.05738	0.0963055	0.007 to 0.188
TG(56:6) [NL-22:5](b)		0.0982534	0.013 to 0.184	0.0246196	0.0568595	0.0998257	0.005 to 0.184
TG(56:7) [NL-20:4]		0.105163	0.013 to 0.197	0.0254261	0.0578612	0.105677	0.008 to 0.193
TG(56:7) [NL-20:5]		0.0345377	-0.053 to 0.122	0.441759	0.551134	0.0339234	-0.067 to 0.129
TG(56:7) [NL-22:5](a)		0.122142	0.034 to 0.21	0.0066455	0.0198028	0.124075	0.033 to 0.205
TG(56:7) [NL-22:5](b)		0.122326	0.035 to 0.21	0.00656788	0.0197546	0.125284	0.035 to 0.195
TG(56:7) [NL-22:6]		0.0845319	0.007 to 0.162	0.0334707	0.072551	0.0824738	0.013 to 0.167
TG(56:8) [NL-20:4]		0.012988	-0.077 to 0.103	0.77774	0.837068	0.0145523	-0.078 to 0.1
TG(56:8) [NL-20:5]		-0.0542185	-0.145 to 0.037	0.244875	0.34432	-0.0571243	-0.142 to 0.041
TG(56:8) [NL-22:6]		0.0729953	-0.009 to 0.155	0.0829371	0.144953	0.0726647	-0.001 to 0.163
TG(56:9) [NL-22:6]		-0.0310126	-0.117 to 0.055	0.478544	0.582967	-0.0314497	-0.111 to 0.055
TG(58:10) [NL-22:6]		-0.0148562	-0.1 to 0.071	0.733715	0.811732	-0.0158808	-0.111 to 0.062
TG(58:8) [NL-22:6]		0.0947126	0.009 to 0.181	0.0312538	0.0690967	0.0927182	0.007 to 0.181
TG(58:9) [NL-22:6]		0.0227848	-0.062 to 0.108	0.600307	0.693211	0.0229953	-0.071 to 0.106
TG(O-50:1) [SIM]		-0.0650769	-0.155 to 0.025	0.158041	0.242372	-0.06443	-0.167 to 0.024
TG(O-50:2) [SIM]		-0.0754582	-0.166 to 0.015	0.103624	0.17065	-0.0747595	-0.163 to 0.004
TG(O-50:3) [SIM]		-0.0847929	-0.181 to 0.011	0.0839476	0.146061	-0.0856246	-0.177 to 0.01
TG(O-52:0) [SIM]		-0.0647521	-0.159 to 0.03	0.180658	0.270117	-0.0632957	-0.158 to 0.029
TG(O-52:1) [SIM]		-0.0829314	-0.168 to 0.002	0.0569256	0.108804	-0.0809367	-0.162 to -0.001
TG(O-52:2) [SIM]		-0.0892808	-0.176 to -0.003	0.0430227	0.0876262	-0.0893564	-0.184 to 0.002
TG(O-54:2) [SIM]		-0.099283	-0.179 to -0.019	0.0156567	0.03958	-0.0988096	-0.182 to -0.018
TG(O-54:3) [SIM]		-0.0043259	-0.094 to 0.085	0.924787	0.949253	-0.00344707	-0.112 to 0.076
TG(O-54:4) [SIM]		-0.0828726	-0.178 to 0.012	0.0884877	0.15224	-0.0844014	-0.181 to 0.013
TG(O-50:1) [NL-15:0]		-0.0922655	-0.185 to 0.001	0.0519698	0.100821	-0.0923234	-0.18 to -0.008
TG(O-50:1) [NL-16:0]		-0.0943104	-0.187 to -0.001	0.0475601	0.093837	-0.0949034	-0.181 to -0.002
TG(O-50:1) [NL-17:1]		-0.0810103	-0.178 to 0.016	0.101872	0.168917	-0.0789005	-0.181 to 0.02
TG(O-50:1) [NL-18:1]		-0.0759258	-0.164 to 0.012	0.0905443	0.153411	-0.0749838	-0.159 to 0.009
TG(O-50:2) [NL-16:1]		-0.0149951	-0.107 to 0.077	0.749713	0.82172	-0.0158252	-0.099 to 0.07
TG(O-50:2) [NL-18:1]		-0.0963188	-0.177 to -0.016	0.0192615	0.046709	-0.0963173	-0.177 to -0.022
TG(O-50:2) [NL-18:2]		-0.0790968	-0.165 to 0.007	0.0719986	0.129631	-0.0801772	-0.161 to 0.022
TG(O-50:3) [NL-18:2]		-0.144532	-0.232 to -0.057	0.0012225	0.0052412	-0.143944	-0.232 to -0.06
TG(O-52:0) [NL-16:0]		-0.111937	-0.202 to -0.021	0.0157156	0.0395952	-0.10946	-0.197 to -0.017
TG(O-52:1) [NL-16:0]		-0.0950856	-0.184 to -0.006	0.0361198	0.076874	-0.0948844	-0.176 to -0.001
TG(O-52:1) [NL-18:1]		-0.0880738	-0.172 to -0.004	0.0408011	0.0837609	-0.0886175	-0.159 to 0
TG(O-52:2) [NL-16:0]		-0.126523	-0.21 to -0.043	0.00322461	0.0110234	-0.127818	-0.21 to -0.052
TG(O-52:2) [NL-17:1]		-0.0942236	-0.179 to -0.01	0.0296956	0.0662178	-0.0933384	-0.178 to -0.001
TG(O-52:2) [NL-18:1]		-0.0990937	-0.18 to -0.018	0.0173831	0.0429595	-0.100274	-0.174 to -0.023
TG(O-54:2) [NL-17:1]		-0.0864261	-0.167 to -0.006	0.0362576	0.076874	-0.0863451	-0.163 to -0.014
TG(O-54:2) [NL-18:1]		-0.109192	-0.19 to -0.029	0.00811124	0.0230561	-0.107022	-0.191 to -0.027
TG(O-54:3) [NL-17:1]		-0.120845	-0.204 to -0.038	0.00461175	0.0147272	-0.120435	-0.202 to -0.032
TG(O-54:3) [NL-18:1]		-0.0966	-0.176 to -0.017	0.0172596	0.0429277	-0.0980735	-0.178 to -0.022
TG(O-54:4) [NL-17:1]		-0.101615	-0.189 to -0.014	0.0238623	0.0557746	-0.0972336	-0.187 to -0.028
TG(O-54:4) [NL-18:2]		-0.0465832	-0.123 to 0.029	0.229891	0.328536	-0.0454073	-0.113 to 0.023
Ubiquinone		0.0706392	-0.015 to 0.156	0.106936	0.173967	0.0714578	-0.014 to 0.154
CE(18:2) [+OH]		-0.0675197	-0.151 to 0.016	0.112165	0.180206	-0.0668131	-0.157 to 0.015
CE(20:4) [+OH]		-0.023319	-0.106 to 0.06	0.582838	0.678085	-0.023267	-0.107 to 0.062
CE(22:6) [+OH]		-0.118183	-0.196 to -0.041	0.00297013	0.0104765	-0.120783	-0.199 to -0.04
LPC(18:2) [+OH]		-0.0660302	-0.126 to -0.006	0.031817	0.0697457	-0.0659118	-0.126 to -0.013
LPC(20:4) [+OH]		-0.00546079	-0.057 to 0.046	0.834617	0.881677	-0.00473276	-0.063 to 0.038
LPC(22:6) [+OH]		-0.0538413	-0.102 to -0.005	0.030403	0.0674079	-0.0529495	-0.107 to -0.01
PC(34:2) [+OH]		-0.105123	-0.179 to -0.032	0.00523532	0.0163157	-0.10519	-0.177 to -0.029
PC(36:4) [+OH]		0.12224	0.038 to 0.207	0.00472327	0.0150215	0.121538	0.044 to 0.219
PC(38:6) [+OH]		-0.160648	-0.245 to -0.077	0.000206391	0.00123199	-0.161064	-0.245 to -0.083
Regression coefficients (β) are estimated difference in log lipidomic measure at 12 months of age (SD units) (adjusted for 6-month lipidomic measure) per 1 SD increase in 12-month log hsCRP (adjusted for 6-month hsCRP).
Models are adjusted for infant sex, birth weight z-score, gestational age, exact age at 6-month and 12-month time point, maternal household income, exposure to any breastfeeding, exposure to any maternal smoking during pregnancy, and 6-month and 12-month blood sample processing time.
Adjusted p-values are based on the Benjamini-Hochberg method of adjustment for multiple comparisons.
Bootstrap estimates are calculated as the mean coefficent across 1000 iterations of bootstrap resampling.
Bootstrap 95% confidence intervals are bias-corrected accelerated percentile confidence intervals.
