# Supplementary material for: Early life infection and proinflammatory, atherogenic metabolomic and lipidomic profiles in infancy: a population-based cohort study
Source: eLife. 2022 May 10;11:e75170. doi: 10.7554/eLife.75170 (PMC9090335; doi:10.7554/eLife.75170)
Supplement: Figure 7—source data 1. [file elife-75170-fig7-data1.xlsx]

## Sheet: Figure 7 - Source Data 1
Figure 7 - Source Data 1. Summary of mediation models for total, natural direct, and natural indirect effects (mediated by GlycA or hsCRP) of infection from birth to 12 months on 12-month metabolomic and lipidomic measures.
	12-month GlycA										12-month hsCRP
	Total effect of infection			Direct effect (not mediated by GlycA)			Indirect effect (mediated by GlycA)				Total effect of infection			Direct effect (not mediated by GlycA)			Indirect effect (mediated by GlycA)
Measure	Estimated effect	95% CI	p-value	Estimated effect	95% CI	p-value	Estimated effect	95% CI	p-value	% mediation	Estimated effect	95% CI	p-value	Estimated effect	95% CI	p-value	Estimated effect	95% CI	p-value	% mediation
NMR metabolomics
Phenylalanine	0.0422153	0.02 to 0.064	0.000196787	0.0333687	0.012 to 0.055	0.00236423	0.00884664	0.002 to 0.016	0.0115883	0.20956	0.0422153	0.02 to 0.064	0.000196787	0.0354764	0.014 to 0.057	0.00123255	0.00673891	0.002 to 0.012	0.00696893	0.159632
HDL-C	-0.0445497	-0.069 to -0.02	0.000293804	-0.022227	-0.046 to 0.001	0.0659328	-0.0223227	-0.034 to -0.011	0.000102113	0.501074	-0.0445497	-0.069 to -0.02	0.000293804	-0.0318447	-0.056 to -0.008	0.00990911	-0.012705	-0.02 to -0.005	0.00134323	0.285187
HDL2-C	-0.043423	-0.068 to -0.019	0.000544751	-0.0202407	-0.045 to 0.004	0.104133	-0.0231823	-0.035 to -0.011	0.000104817	0.533871	-0.043423	-0.068 to -0.019	0.000544751	-0.0308179	-0.056 to -0.006	0.0153874	-0.0126052	-0.02 to -0.005	0.00140286	0.290288
ApoA1	-0.0389538	-0.063 to -0.015	0.00127674	-0.0263927	-0.051 to -0.002	0.0347926	-0.0125611	-0.021 to -0.004	0.00397157	0.322461	-0.0389538	-0.063 to -0.015	0.00127674	-0.0252937	-0.049 to -0.002	0.0352866	-0.0136601	-0.022 to -0.005	0.00130593	0.350673
HDL3-C	-0.0365562	-0.058 to -0.015	0.00103266	-0.0298311	-0.052 to -0.007	0.00888363	-0.00672512	-0.013 to 0	0.0380411	0.183966	-0.0365562	-0.058 to -0.015	0.00103266	-0.0274323	-0.048 to -0.006	0.0104403	-0.0091239	-0.015 to -0.003	0.00350786	0.249586
Citrate	-0.0390664	-0.067 to -0.012	0.00537912	-0.0303722	-0.058 to -0.003	0.0318254	-0.00869426	-0.015 to -0.002	0.0103837	0.222551	-0.0390664	-0.067 to -0.012	0.00537912	-0.0343503	-0.063 to -0.006	0.0171136	-0.00471611	-0.01 to 0	0.0714684	0.12072
HDL particle size	-0.034511	-0.059 to -0.01	0.00521884	-0.0224048	-0.047 to 0.002	0.0714416	-0.0121062	-0.02 to -0.004	0.00290317	0.350792	-0.034511	-0.059 to -0.01	0.00521884	-0.0284177	-0.053 to -0.003	0.0260496	-0.00609329	-0.012 to 0	0.0566057	0.176561
TG/PG	0.0340539	0.009 to 0.059	0.00769352	0.00215256	-0.021 to 0.025	0.852532	0.0319013	0.018 to 0.046	7.82134e-06	0.93679	0.0340539	0.009 to 0.059	0.00769352	0.0326872	0.007 to 0.058	0.0120403	0.00136666	-0.003 to 0.006	0.577965	0.0401323
LC/MS lipidomics class totals
Dehydro-cholesteryl esters	-0.0506992	-0.076 to -0.026	7.84e-05	-0.028448	-0.052 to -0.005	0.0173544	-0.0222512	-0.033 to -0.011	5.20729e-05	0.438886	-0.0512	-0.076 to -0.026	6.4248e-05	-0.0463049	-0.072 to -0.021	0.000369602	-0.00489502	-0.01 to 0.001	0.0777498	0.095606
Ceramide-1-phosphate	-0.0384777	-0.062 to -0.015	0.0015771	-0.0249631	-0.05 to 0	0.0472611	-0.0135146	-0.021 to -0.006	0.000405144	0.351232	-0.0389041	-0.063 to -0.015	0.001383	-0.0299149	-0.054 to -0.006	0.0157221	-0.00898921	-0.016 to -0.002	0.00773667	0.23106
Tri-hexosyl-ceramides	-0.0400822	-0.064 to -0.016	0.00120746	-0.0290502	-0.053 to -0.005	0.0178653	-0.0110321	-0.018 to -0.004	0.00216268	0.275236	-0.0401601	-0.064 to -0.016	0.00118829	-0.0315179	-0.056 to -0.007	0.0105845	-0.00864221	-0.015 to -0.002	0.00741261	0.215194
Lysoalkenyl phosphatidylcholines	-0.0211878	-0.04 to -0.002	0.0315011	-0.0138436	-0.033 to 0.006	0.166173	-0.00734419	-0.012 to -0.003	0.00110077	0.346623	-0.0215226	-0.041 to -0.002	0.0288593	-0.0114778	-0.03 to 0.007	0.224664	-0.0100448	-0.016 to -0.004	0.000546619	0.466708
Alkylphosphatidylethanolamines	-0.0328328	-0.055 to -0.011	0.00361234	-0.016436	-0.038 to 0.005	0.141381	-0.0163968	-0.025 to -0.008	0.000174841	0.499403	-0.0330882	-0.055 to -0.011	0.00335337	-0.0176856	-0.039 to 0.004	0.106299	-0.0154026	-0.024 to -0.007	0.000436714	0.465502
Alkenylphosphatidylethanolamines	-0.0330229	-0.057 to -0.009	0.00662152	-0.021209	-0.045 to 0.003	0.0816285	-0.0118139	-0.019 to -0.005	0.00115326	0.35775	-0.0330714	-0.057 to -0.009	0.00655568	-0.0229183	-0.047 to 0.001	0.0607078	-0.0101531	-0.017 to -0.004	0.00253073	0.307005
Cholesteryl esters	-0.0317246	-0.056 to -0.007	0.0117645	-0.0180669	-0.042 to 0.006	0.138446	-0.0136578	-0.022 to -0.006	0.000687862	0.43051	-0.0319443	-0.057 to -0.007	0.0111885	-0.0234809	-0.048 to 0.001	0.0596506	-0.00846347	-0.015 to -0.002	0.00890101	0.264944
Lipid species
HexCer(d18:2/18:0)	-0.0460679	-0.069 to -0.023	9.32201e-05	-0.0357862	-0.059 to -0.013	0.00257537	-0.0102818	-0.017 to -0.004	0.0029008	0.223187	-0.046486	-0.07 to -0.023	7.74659e-05	-0.042492	-0.066 to -0.019	0.000348274	-0.00399404	-0.009 to 0.001	0.119168	0.0859193
HexCer(d18:2/22:0)	-0.0442906	-0.069 to -0.02	0.000371489	-0.0345296	-0.059 to -0.01	0.00549434	-0.00976103	-0.016 to -0.003	0.00420848	0.220386	-0.0446677	-0.069 to -0.02	0.000325103	-0.0423095	-0.067 to -0.018	0.000635552	-0.00235819	-0.007 to 0.002	0.329349	0.0527941
Hex3Cer(d18:1/18:0)	-0.0455692	-0.07 to -0.021	0.000212697	-0.0355519	-0.06 to -0.011	0.0046271	-0.0100173	-0.017 to -0.004	0.00252357	0.219827	-0.045632	-0.07 to -0.022	0.000209868	-0.0370347	-0.061 to -0.013	0.00298179	-0.00859733	-0.015 to -0.002	0.00679382	0.188406
Hex3Cer(d18:1/20:0)	-0.0449634	-0.07 to -0.02	0.000426199	-0.0375614	-0.063 to -0.013	0.00330274	-0.00740199	-0.013 to -0.002	0.0139316	0.164622	-0.0451547	-0.07 to -0.02	0.000401838	-0.038924	-0.064 to -0.014	0.00220547	-0.0062307	-0.012 to -0.001	0.0287143	0.137986
Hex3Cer(d18:1/22:0)	-0.0443993	-0.069 to -0.02	0.000396659	-0.0342235	-0.058 to -0.01	0.00545985	-0.0101759	-0.017 to -0.003	0.0042366	0.229189	-0.0446199	-0.069 to -0.02	0.000371779	-0.0366049	-0.061 to -0.012	0.00299727	-0.00801503	-0.014 to -0.002	0.00974641	0.179629
GM3(d18:1/18:0)	-0.0452829	-0.069 to -0.022	0.000169396	-0.0349275	-0.058 to -0.011	0.00363012	-0.0103554	-0.017 to -0.004	0.00226057	0.228683	-0.0454245	-0.069 to -0.022	0.000162	-0.0380136	-0.062 to -0.014	0.00163781	-0.00741096	-0.013 to -0.001	0.0161978	0.163149
DE(18:2)	-0.050051	-0.075 to -0.025	7.49957e-05	-0.0286383	-0.052 to -0.006	0.0152414	-0.0214127	-0.032 to -0.011	5.36452e-05	0.427818	-0.0505595	-0.075 to -0.026	6.09183e-05	-0.0451823	-0.07 to -0.02	0.000451818	-0.0053772	-0.011 to 0	0.0573625	0.106354
CE(22:6)	-0.0438005	-0.069 to -0.019	0.000511994	-0.028472	-0.052 to -0.005	0.0183537	-0.0153284	-0.024 to -0.007	0.000454125	0.34996	-0.0441145	-0.069 to -0.019	0.000465685	-0.0411375	-0.066 to -0.016	0.00110578	-0.002977	-0.008 to 0.002	0.242828	0.0674835
HexCer(d16:1/24:0)	-0.043132	-0.069 to -0.018	0.000919229	-0.0325527	-0.058 to -0.007	0.0130558	-0.0105794	-0.017 to -0.004	0.0023719	0.245279	-0.0434605	-0.069 to -0.018	0.000843215	-0.0404601	-0.066 to -0.015	0.00202318	-0.00300042	-0.008 to 0.002	0.239481	0.069038
PE(18:0_20:3) (a)	0.0427105	0.018 to 0.068	0.000750994	0.0285828	0.005 to 0.052	0.018628	0.0141277	0.006 to 0.022	0.000593461	0.330777	0.0430891	0.018 to 0.068	0.000673883	0.0475189	0.022 to 0.073	0.000217108	-0.00442976	-0.009 to 0.001	0.0804111	-0.102805
Estimated effects are difference in log metabolomic/lipidomic measure at 12 months of age (SD units) per 1 increase in total parent-reported infections from birth to 12 months of age. Units for inflammation markers (GlycA and hsCRP) are 1 SD unit on a log scale.
Models are adjusted for infant sex, birth weight z-score, gestational age, exact age at 12-month time point, maternal household income, exposure to any breastfeeding, exposure to any maternal smoking during pregnancy, and 12-month blood sample processing time.
% mediation is the indirect effect mediated by inflammation as a percentage of the total effect of infection.
