# Supplementary material for: Early life infection and proinflammatory, atherogenic metabolomic and lipidomic profiles in infancy: a population-based cohort study
Source: eLife. 2022 May 10;11:e75170. doi: 10.7554/eLife.75170 (PMC9090335; doi:10.7554/eLife.75170)
Supplement: Figure 7—source data 2. [file elife-75170-fig7-data2.xlsx]

## Sheet: Figure 7 - Source Data 2
Figure 7 - Source Data 2. Summary of mediation models for total, natural direct, and natural indirect effects (mediated by GlycA or hsCRP) of infection from 6 to 12 months on 12-month metabolomic and lipidomic measures, with adjustment for infections from birth to 6 months of age, 6-month inflammation, and the corresponding 6-month metabolomic/lipidomic measure.
	12-month GlycA										12-month hsCRP
	Total effect of infection from 6 to 12 months			Direct effect (not mediated by GlycA)			Indirect effect (mediated by GlycA)				Total effect of infection from 6 to 12 months			Direct effect (not mediated by GlycA)			Indirect effect (mediated by GlycA)
Measure	Estimated effect	95% CI	p-value	Estimated effect	95% CI	p-value	Estimated effect	95% CI	p-value	% mediation	Estimated effect	95% CI	p-value	Estimated effect	95% CI	p-value	Estimated effect	95% CI	p-value	% mediation
NMR metabolomics
Phenylalanine	0.072174	0.038 to 0.107	4.2658e-05	0.0599444	0.025 to 0.095	0.000824396	0.0122296	0.002 to 0.023	0.0247355	0.169446	0.0742971	0.039 to 0.109	3.04661e-05	0.0633643	0.029 to 0.098	0.000329568	0.0109329	0.003 to 0.019	0.00560535	0.147151
HDL-C	-0.0562091	-0.089 to -0.023	0.00086877	-0.0280912	-0.064 to 0.008	0.129652	-0.0281178	-0.046 to -0.01	0.00202762	0.500236	-0.057982	-0.091 to -0.025	0.000540377	-0.0464294	-0.08 to -0.013	0.00709073	-0.0115526	-0.021 to -0.002	0.0146869	0.199244
ApoA1	-0.0482582	-0.084 to -0.013	0.00775385	-0.034145	-0.074 to 0.006	0.0962621	-0.0141132	-0.028 to 0	0.0423571	0.292452	-0.049821	-0.085 to -0.015	0.00558604	-0.0364147	-0.073 to 0	0.0486177	-0.0134063	-0.024 to -0.003	0.00966516	0.26909
Citrate	-0.050852	-0.087 to -0.014	0.00627069	-0.0366898	-0.074 to 0.001	0.0539251	-0.0141622	-0.026 to -0.003	0.0152969	0.278499	-0.0487722	-0.085 to -0.013	0.00769884	-0.0425967	-0.079 to -0.006	0.023605	-0.0061755	-0.014 to 0.001	0.103611	0.126619
HDL particle size	-0.0468361	-0.078 to -0.016	0.00299258	-0.0349067	-0.068 to -0.002	0.0363622	-0.0119294	-0.023 to -0.001	0.0322782	0.254706	-0.0502488	-0.081 to -0.02	0.00129289	-0.0466623	-0.079 to -0.015	0.00410098	-0.00358656	-0.011 to 0.004	0.341919	0.0713759
TG/PG	0.0468486	0.008 to 0.085	0.0166733	0.000404908	-0.033 to 0.034	0.981235	0.0464437	0.023 to 0.07	0.000111132	0.991357	0.045858	0.007 to 0.084	0.0194299	0.0450387	0.006 to 0.084	0.0249655	0.000819347	-0.006 to 0.007	0.801901	0.017867
LC/MS lipidomics class totals
Dehydro-cholesteryl esters	-0.0694704	-0.11 to -0.029	0.000724758	-0.0393044	-0.077 to -0.002	0.0406551	-0.030166	-0.048 to -0.013	0.000730914	0.434228	-0.0682071	-0.109 to -0.028	0.000941212	-0.0623517	-0.103 to -0.021	0.00283232	-0.00585547	-0.013 to 0.001	0.0993435	0.0858483
Ceramide-1-phosphate	-0.0553297	-0.092 to -0.019	0.00315375	-0.0398169	-0.077 to -0.003	0.0336746	-0.0155127	-0.026 to -0.005	0.00314096	0.280369	-0.0521957	-0.088 to -0.016	0.00448014	-0.0424919	-0.078 to -0.007	0.0194633	-0.00970376	-0.018 to -0.001	0.0226849	0.185911
Tri-hexosyl-ceramides	-0.0432569	-0.08 to -0.007	0.0193756	-0.0322363	-0.068 to 0.004	0.0804212	-0.0110206	-0.02 to -0.002	0.0205641	0.25477	-0.0376444	-0.074 to -0.002	0.0410335	-0.0292068	-0.065 to 0.007	0.112041	-0.00843761	-0.016 to -0.001	0.0278451	0.22414
Lysoalkenyl phosphatidylcholines	-0.031271	-0.062 to 0	0.0474941	-0.0231591	-0.055 to 0.008	0.149824	-0.00811193	-0.014 to -0.002	0.00718201	0.259407	-0.0314793	-0.061 to -0.002	0.0378432	-0.02036	-0.049 to 0.009	0.16881	-0.0111193	-0.018 to -0.004	0.00241791	0.353226
Alkylphosphatidylethanolamines	-0.0319501	-0.066 to 0.002	0.0651879	-0.00943248	-0.042 to 0.023	0.570495	-0.0225176	-0.036 to -0.009	0.000715913	0.704774	-0.0297799	-0.064 to 0.004	0.0856188	-0.0108508	-0.044 to 0.022	0.515257	-0.0189291	-0.03 to -0.008	0.000846884	0.635633
Alkenylphosphatidylethanolamines	-0.0395291	-0.074 to -0.005	0.0248008	-0.0255339	-0.06 to 0.009	0.142586	-0.0139952	-0.024 to -0.004	0.0048513	0.354048	-0.0406888	-0.074 to -0.007	0.0180772	-0.0289662	-0.063 to 0.005	0.0908735	-0.0117226	-0.02 to -0.004	0.00496274	0.288104
Cholesteryl esters	-0.0321301	-0.07 to 0.006	0.0974121	-0.0135088	-0.051 to 0.024	0.47678	-0.0186213	-0.031 to -0.006	0.00261772	0.579558	-0.0300107	-0.067 to 0.007	0.115384	-0.0208708	-0.058 to 0.017	0.27401	-0.00913995	-0.017 to -0.001	0.025209	0.304556
Lipid species
HexCer(d18:2/18:0)	-0.0273619	-0.063 to 0.008	0.129908	-0.0129388	-0.049 to 0.023	0.484537	-0.0144231	-0.025 to -0.004	0.00540885	0.527124	-0.021852	-0.057 to 0.014	0.228163	-0.0158059	-0.052 to 0.021	0.396418	-0.00604613	-0.013 to 0.001	0.10077	0.276685
HexCer(d18:2/22:0)	-0.0500154	-0.084 to -0.016	0.00419328	-0.0360638	-0.071 to -0.001	0.0416456	-0.0139517	-0.024 to -0.004	0.00691821	0.278947	-0.0403296	-0.075 to -0.006	0.0223297	-0.0367332	-0.072 to -0.002	0.0404853	-0.00359636	-0.01 to 0.003	0.283848	0.0891743
Hex3Cer(d18:1/18:0)	-0.0538637	-0.09 to -0.018	0.00345432	-0.043356	-0.08 to -0.007	0.0199671	-0.0105076	-0.019 to -0.002	0.015625	0.195079	-0.0485654	-0.085 to -0.012	0.00845957	-0.039811	-0.077 to -0.003	0.0339667	-0.00875445	-0.016 to -0.001	0.0235763	0.180261
Hex3Cer(d18:1/20:0)	-0.0575466	-0.09 to -0.025	0.000526525	-0.0517777	-0.085 to -0.019	0.00202097	-0.00576895	-0.013 to 0.002	0.130395	0.100248	-0.0532634	-0.085 to -0.021	0.00117864	-0.0471976	-0.08 to -0.015	0.00420401	-0.00606581	-0.013 to 0.001	0.0831945	0.113883
Hex3Cer(d18:1/22:0)	-0.0562286	-0.093 to -0.02	0.00255851	-0.0462598	-0.083 to -0.01	0.0133979	-0.0099688	-0.019 to -0.001	0.0327478	0.177291	-0.0499017	-0.086 to -0.013	0.00731011	-0.0414071	-0.078 to -0.005	0.0255031	-0.00849459	-0.016 to -0.001	0.0266422	0.170226
GM3(d18:1/18:0)	-0.0462971	-0.083 to -0.009	0.0141012	-0.0364841	-0.074 to 0.001	0.0541393	-0.009813	-0.018 to -0.001	0.0208997	0.211957	-0.044235	-0.08 to -0.008	0.0165698	-0.0365201	-0.073 to 0	0.0486036	-0.00771498	-0.015 to 0	0.045694	0.174409
DE(18:2)	-0.0695589	-0.11 to -0.029	0.000727411	-0.0401707	-0.078 to -0.003	0.0353381	-0.0293883	-0.046 to -0.012	0.000749879	0.422494	-0.0682166	-0.109 to -0.028	0.000942502	-0.0609838	-0.102 to -0.02	0.00337703	-0.00723281	-0.015 to 0	0.0545056	0.106027
CE(22:6)	-0.0655903	-0.104 to -0.027	0.000778385	-0.0472197	-0.085 to -0.01	0.0131483	-0.0183706	-0.031 to -0.006	0.00332452	0.280081	-0.0638351	-0.102 to -0.025	0.00114836	-0.0638987	-0.103 to -0.025	0.00127209	6.36012e-05	-0.006 to 0.006	0.983752	-0.000996336
HexCer(d16:1/24:0)	-0.0459525	-0.08 to -0.012	0.00774505	-0.0319392	-0.066 to 0.002	0.0640952	-0.0140133	-0.024 to -0.004	0.00564697	0.304952	-0.0365102	-0.07 to -0.003	0.0319924	-0.0332127	-0.067 to 0.001	0.0574218	-0.00329754	-0.01 to 0.003	0.30495	0.0903183
PE(18:0_20:3) (a)	0.0627001	0.025 to 0.1	0.00109211	0.0432104	0.007 to 0.079	0.0179725	0.0194896	0.007 to 0.032	0.00221266	0.310839	0.0615446	0.024 to 0.099	0.00132686	0.0672881	0.029 to 0.106	0.00056221	-0.00574346	-0.013 to 0.001	0.100841	-0.0933219
Estimated effects are difference in log metabolomic/lipidomic measure at 12 months of age (SD units) per 1 increase in total parent-reported infections from 6 to 12 months of age. Units for inflammation markers (GlycA and hsCRP) are 1 SD unit on a log scale.
Models are adjusted for 6-month corresponding metabolic measure, number of infections from birth to 6 months, 6-month inflammation (GlycA or hsCRP), infant sex, birth weight z-score, gestational age, exact age at 12-month time point, maternal household income, exposure to any breastfeeding, exposure to any maternal smoking during pregnancy, and 12-month blood sample processing time.
% mediation is the indirect effect mediated by inflammation as a percentage of the total effect of infection.
