# Supplementary material for: Early life infection and proinflammatory, atherogenic metabolomic and lipidomic profiles in infancy: a population-based cohort study
Source: eLife journal article supplement (doi:10.7554/elife.75170), 2022-04-25
Supplement: supp3 [file elife-75170-supp3-v1.pdf]

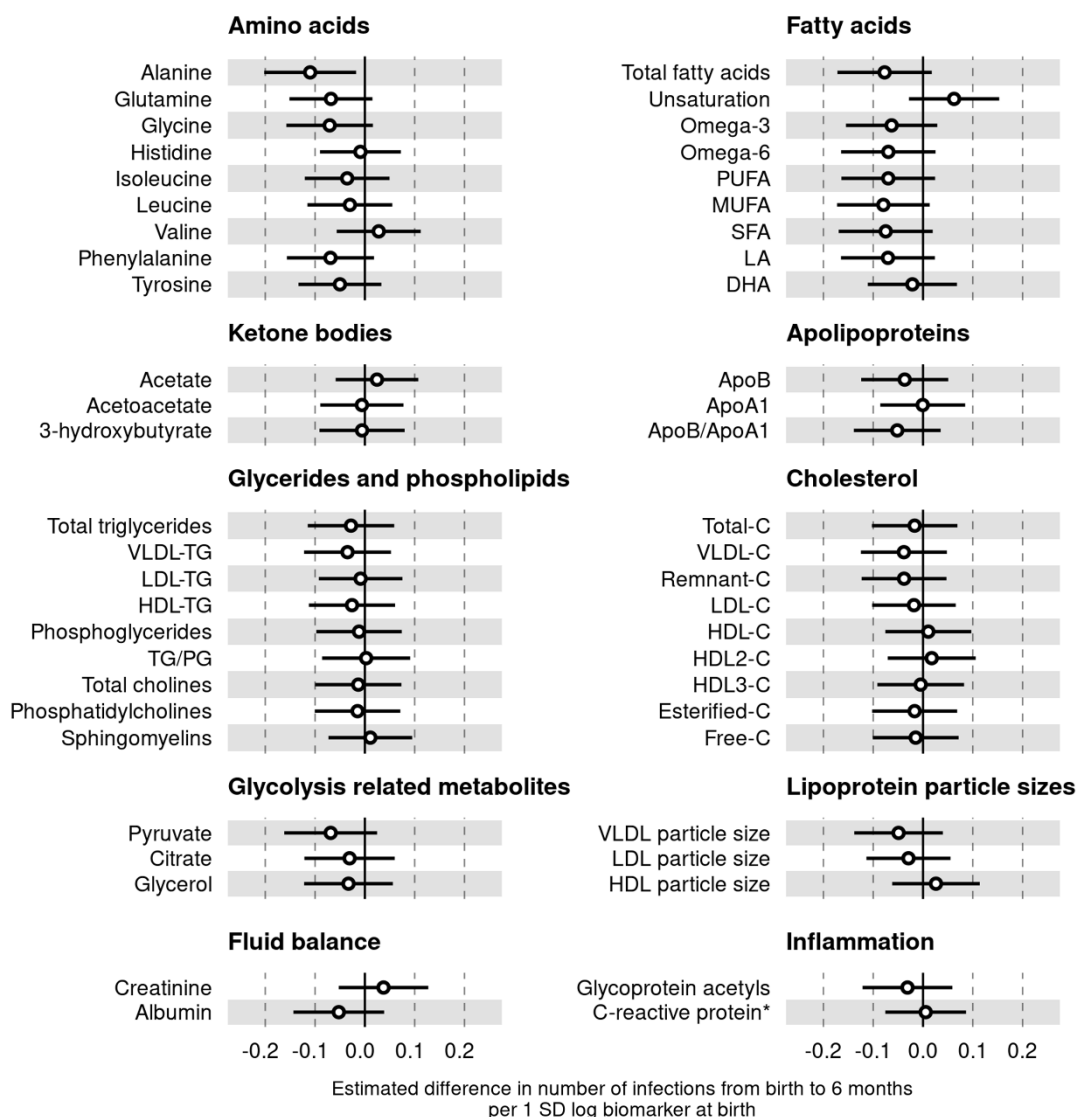

**Supplementary File 3A.** Difference in log number of parent-reported infections from birth to 6 months of age for each SD increase in log serum NMR metabolomic measure at birth. Error bars are 95% confidence intervals. Closed points represent adjusted  $p$ -value  $< 0.05$ . Models were adjusted for infant age, sex, gestational age, birth weight, mode of delivery, maternal household income, smoking during pregnancy, and breastfeeding status.

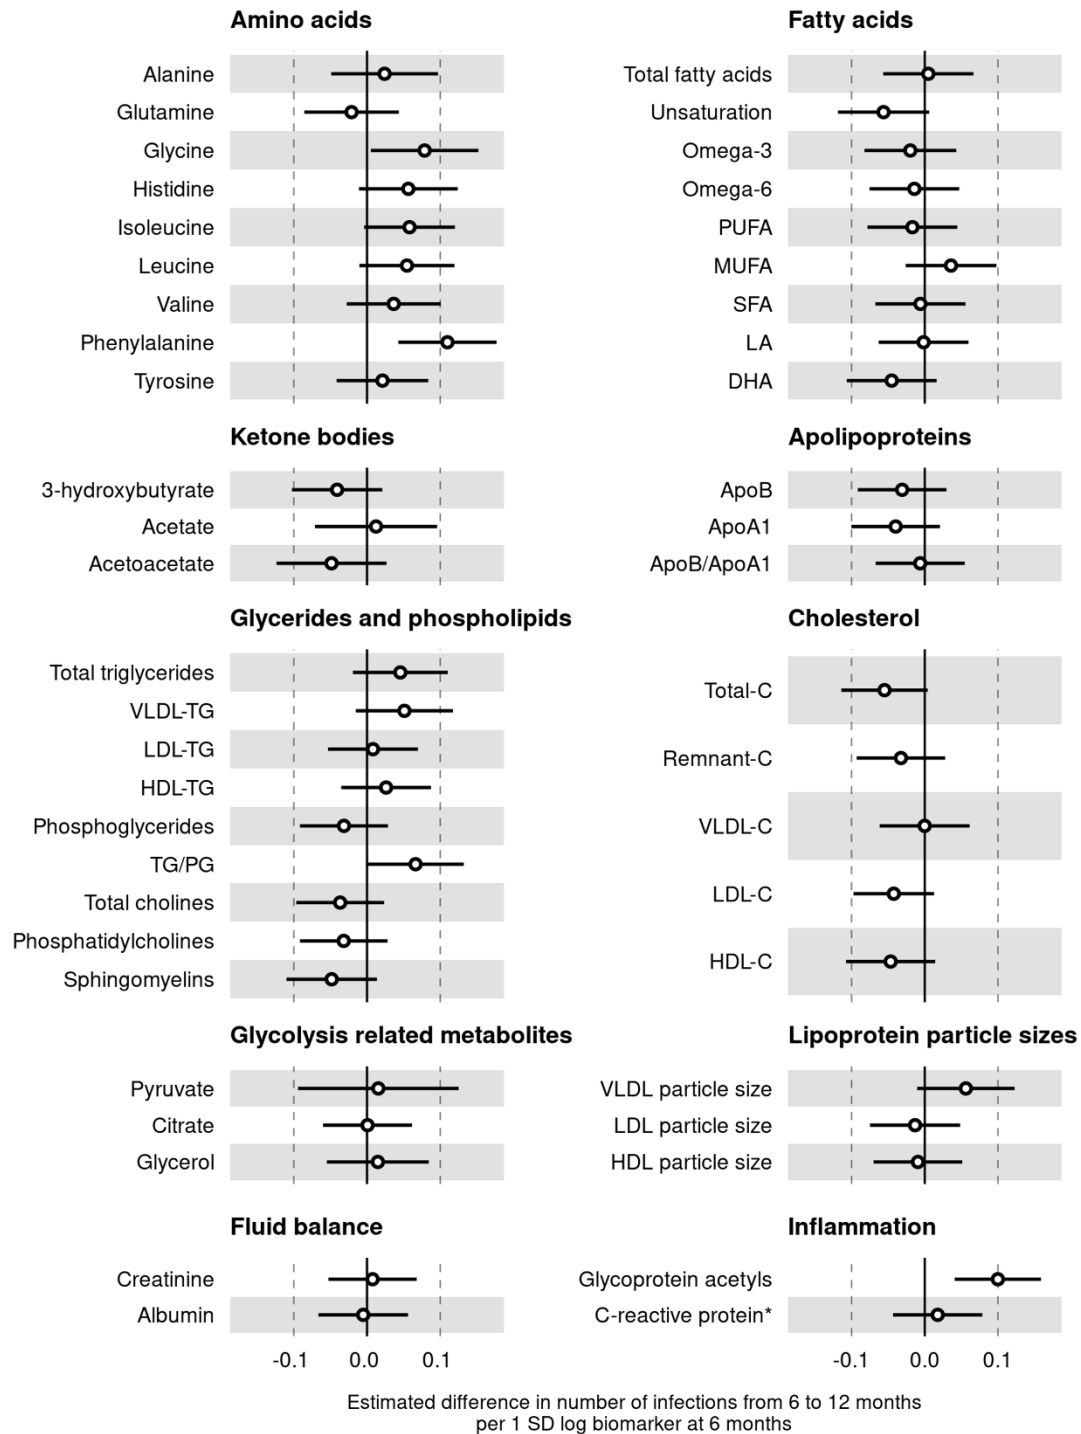

**Supplementary File 3B.** Difference in log number of parent-reported infections from 6 to 12 months of age for each SD increase in 6-month log plasma NMR metabolomic measure. Error bars are 95% confidence intervals. Closed points represent adjusted p-value<0.05. Models were adjusted for number of infections from birth to 6 months of age, infant age, sex, gestational age, birth weight, mode of delivery, maternal household income, smoking during pregnancy, breastfeeding status, and sample processing time.

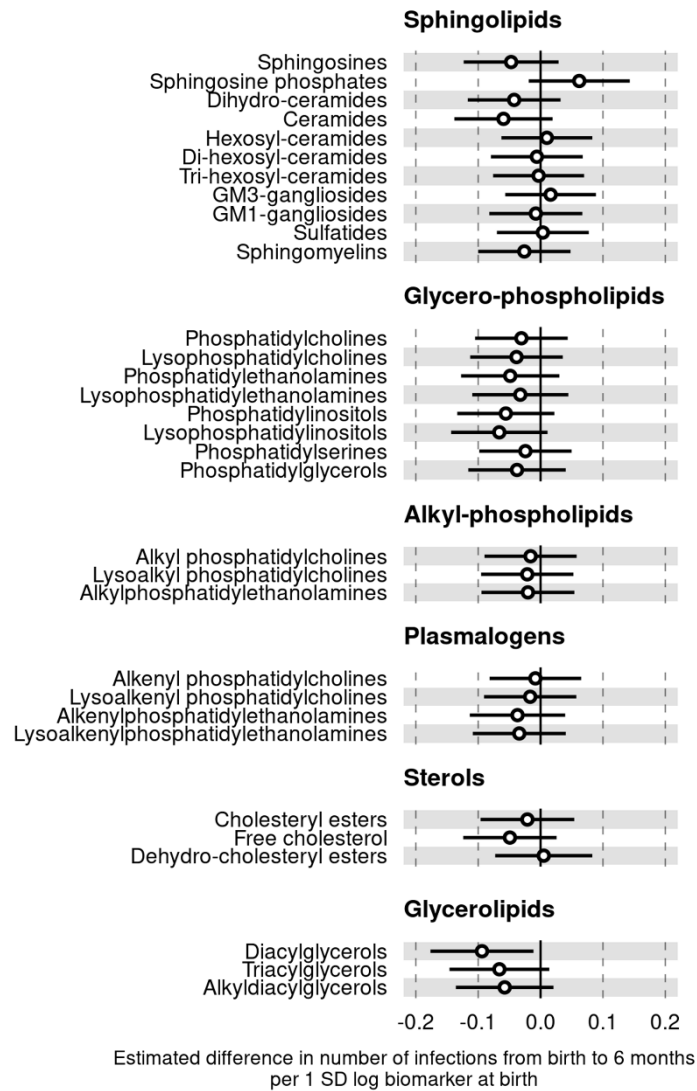

**Supplementary File 3C.** Difference in log number of parent-reported infections from birth to 6 months of age for each SD increase in log serum LC/MS lipidomic measure at birth. Error bars are 95% confidence intervals. Closed points represent adjusted p-value<0.05. Models were adjusted for infant age, sex, gestational age, birth weight, mode of delivery, maternal household income, smoking during pregnancy, and breastfeeding status.

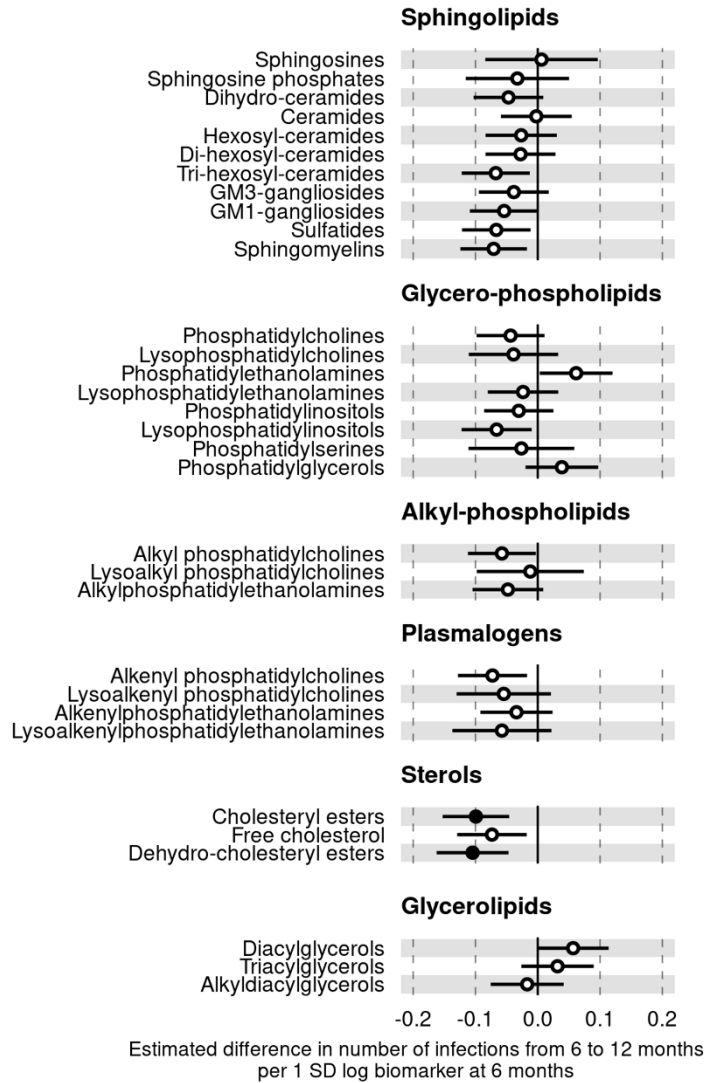

**Supplementary File 3D.** Difference in log number of parent-reported infections from 6 to 12 months of age for each SD increase in 6-month log serum LC/MS lipidomic measure. Error bars are 95% confidence intervals. Closed points represent adjusted p-value<0.05. Models were adjusted for number of infections from birth to 6 months of age, infant age, sex, gestational age, birth weight, mode of delivery, maternal household income, smoking during pregnancy, breastfeeding status, and sample processing time.
