# Supplementary material for: Early life infection and proinflammatory, atherogenic metabolomic and lipidomic profiles in infancy: a population-based cohort study
Source: eLife. 2022 May 10;11:e75170. doi: 10.7554/eLife.75170 (PMC9090335; doi:10.7554/eLife.75170)
Supplement: Supplementary file 2. — (A) Distribution of NMR metabolomic measures in cohort. (B) Distribution of LC/MS lipidomic measures in cohort. [file elife-75170-supp2.xlsx]

## Sheet: Supp. File 2A
Supplementary File 2A. Distribution of NMR metabolomic measures in cohort.
			6 months of age							12 months of age
Measure	Description	Units	N	Mean	SD	Median	IQR	n with zero value	Lowest non-zero value	N	Mean	SD	Median	IQR	n with zero value	Lowest non-zero value
XXL-VLDL-P	Concentration of chylomicrons and extremely large VLDL particles	mmol/l	500	1.02837e-06	9.41929e-07	8.11e-07	[0 to 0]	0	1.1e-08	555	8.33082e-11	7.8612e-11	6.91e-11	[0 to 0]	119	9.86e-12
XXL-VLDL-L	Total lipids in chylomicrons and extremely large VLDL	mmol/l	500	0.135366	0.130213	0.103215	[0.035 to 0.197]	0	0.00139898	555	0.0175509	0.0166741	0.01421	[0.005 to 0.025]	119	0.00195
XXL-VLDL-PL	Phospholipids in chylomicrons and extremely large VLDL	mmol/l	500	0.0207227	0.0188692	0.0168122	[0.006 to 0.03]	0	1.62e-05	555	0.00191088	0.0020548	0.001355	[0 to 0.003]	123	2.168e-05
XXL-VLDL-C	Cholesterol in chylomicrons and extremely large VLDL	mmol/l	500	0.0322186	0.0242877	0.0283005	[0.013 to 0.046]	0	0.0013264	555	0.00253002	0.00256015	0.001946	[0 to 0.004]	120	4.608e-05
XXL-VLDL-CE	Cholesteryl esters in chylomicrons and extremely large VLDL	mmol/l	500	0.0176893	0.0133301	0.0157815	[0.007 to 0.025]	0	0.000725087	555	0.00137525	0.00136935	0.001088	[0 to 0.002]	121	2.005e-05
XXL-VLDL-FC	Free cholesterol in chylomicrons and extremely large VLDL	mmol/l	500	0.0145293	0.0113618	0.0122265	[0.006 to 0.021]	0	0.000436965	555	0.00115473	0.00124312	0.0008277	[0 to 0.002]	122	1.862e-05
XXL-VLDL-TG	Triglycerides in chylomicrons and extremely large VLDL	mmol/l	500	0.0824246	0.0893446	0.056949	[0.014 to 0.123]	0	6.9e-09	555	0.01311	0.0121631	0.01105	[0.004 to 0.019]	119	0.001409
XL-VLDL-P	Concentration of very large VLDL particles	mmol/l	500	2.6255e-06	1.45258e-06	2.45e-06	[0 to 0]	0	4.08e-08	555	4.46439e-10	4.21386e-10	3.69e-10	[0 to 0]	151	6.64e-11
XL-VLDL-L	Total lipids in very large VLDL	mmol/l	500	0.149916	0.0871415	0.140797	[0.082 to 0.204]	0	0.0016758	555	0.0426486	0.0406811	0.03495	[0 to 0.064]	151	0.006455
XL-VLDL-PL	Phospholipids in very large VLDL	mmol/l	500	0.0260326	0.0162427	0.0239119	[0.013 to 0.036]	0	8.19e-06	555	0.00580321	0.00634494	0.004022	[0 to 0.009]	151	0.00015
XL-VLDL-C	Cholesterol in very large VLDL	mmol/l	500	0.0363273	0.0174051	0.0350532	[0.024 to 0.048]	0	0.000888789	555	0.00772539	0.00766348	0.006306	[0 to 0.012]	151	0.0005824
XL-VLDL-CE	Cholesteryl esters in very large VLDL	mmol/l	500	0.020589	0.00891915	0.0201403	[0.015 to 0.026]	0	0.000435299	555	0.00487176	0.00433226	0.00442	[0 to 0.007]	151	0.000407
XL-VLDL-FC	Free cholesterol in very large VLDL	mmol/l	500	0.0157383	0.00884986	0.0149038	[0.009 to 0.021]	0	0.000322195	555	0.00285363	0.00341283	0.001753	[0 to 0.004]	152	3.723e-05
XL-VLDL-TG	Triglycerides in very large VLDL	mmol/l	500	0.0875565	0.0548144	0.0796257	[0.045 to 0.118]	0	1.39e-06	555	0.0291205	0.0268489	0.02493	[0 to 0.043]	151	0.004145
L-VLDL-P	Concentration of large VLDL particles	mmol/l	500	8.0075e-06	3.67616e-06	7.575e-06	[0 to 0]	0	7.93e-07	555	3.48613e-09	2.24868e-09	3.1e-09	[0 to 0]	54	9.5e-10
L-VLDL-L	Total lipids in large VLDL	mmol/l	500	0.260227	0.123188	0.24649	[0.164 to 0.339]	0	0.0199723	555	0.198901	0.129746	0.1776	[0.115 to 0.268]	54	0.05185
L-VLDL-PL	Phospholipids in large VLDL	mmol/l	500	0.0520814	0.02567	0.0493959	[0.033 to 0.069]	0	1.14e-05	555	0.0341394	0.0230695	0.0303	[0.019 to 0.046]	54	0.007475
L-VLDL-C	Cholesterol in large VLDL	mmol/l	500	0.0721227	0.0310501	0.0693495	[0.049 to 0.093]	0	0.00235528	555	0.042524	0.0287121	0.0385	[0.023 to 0.058]	54	0.003813
L-VLDL-CE	Cholesteryl esters in large VLDL	mmol/l	500	0.0368664	0.0154885	0.0361797	[0.026 to 0.047]	0	0.000809421	555	0.0254939	0.0147477	0.02419	[0.016 to 0.034]	54	0.003198
L-VLDL-FC	Free cholesterol in large VLDL	mmol/l	500	0.0352563	0.0158233	0.0333281	[0.024 to 0.045]	0	0.00154586	555	0.0170299	0.0143185	0.014	[0.006 to 0.025]	54	0.0003094
L-VLDL-TG	Triglycerides in large VLDL	mmol/l	500	0.136023	0.068325	0.127908	[0.084 to 0.18]	0	0.0157466	555	0.122237	0.0782784	0.1067	[0.072 to 0.164]	54	0.03501
M-VLDL-P	Concentration of medium VLDL particles	mmol/l	500	2.53658e-05	8.30548e-06	2.46605e-05	[0 to 0]	0	2.47e-06	555	1.38168e-08	5.45642e-09	1.3e-08	[0 to 0]	1	2.88e-09
M-VLDL-L	Total lipids in medium VLDL	mmol/l	500	0.435064	0.144634	0.426047	[0.335 to 0.537]	0	0.0778603	555	0.454434	0.18099	0.4275	[0.324 to 0.556]	1	0.09101
M-VLDL-PL	Phospholipids in medium VLDL	mmol/l	500	0.092036	0.0322078	0.088959	[0.071 to 0.115]	0	1.19e-05	555	0.0913565	0.0346635	0.08585	[0.066 to 0.112]	1	0.01954
M-VLDL-C	Cholesterol in medium VLDL	mmol/l	500	0.11175	0.0411485	0.108774	[0.084 to 0.142]	0	0.00278301	555	0.106948	0.0459544	0.1014	[0.075 to 0.133]	1	0.01163
M-VLDL-CE	Cholesteryl esters in medium VLDL	mmol/l	500	0.0574993	0.0233973	0.0554908	[0.042 to 0.073]	0	0.00122149	555	0.0579776	0.024131	0.05543	[0.041 to 0.074]	1	0.006354
M-VLDL-FC	Free cholesterol in medium VLDL	mmol/l	500	0.0542504	0.0190767	0.0525432	[0.041 to 0.067]	0	0.00156151	555	0.0489697	0.0230246	0.04599	[0.033 to 0.062]	1	0.003524
M-VLDL-TG	Triglycerides in medium VLDL	mmol/l	500	0.231278	0.0845934	0.222239	[0.166 to 0.29]	0	0.0636643	555	0.256136	0.1024	0.2367	[0.184 to 0.312]	1	0.05534
S-VLDL-P	Concentration of small VLDL particles	mmol/l	500	3.356e-05	9.19077e-06	3.28e-05	[0 to 0]	0	9.82e-06	555	2.31662e-08	6.40388e-09	2.28e-08	[0 to 0]	5	8.21e-09
S-VLDL-L	Total lipids in small VLDL	mmol/l	500	0.345485	0.0916678	0.338719	[0.284 to 0.404]	0	0.0912753	555	0.440946	0.122794	0.4337	[0.359 to 0.523]	5	0.152
S-VLDL-PL	Phospholipids in small VLDL	mmol/l	500	0.0771299	0.0210465	0.0759767	[0.064 to 0.091]	0	0.011286	555	0.109232	0.0263651	0.1085	[0.092 to 0.127]	5	0.04754
S-VLDL-C	Cholesterol in small VLDL	mmol/l	500	0.121235	0.0344036	0.119271	[0.099 to 0.144]	0	0.0209768	555	0.119745	0.0429815	0.1186	[0.09 to 0.147]	5	0.01359
S-VLDL-CE	Cholesteryl esters in small VLDL	mmol/l	500	0.0766827	0.021868	0.0753603	[0.063 to 0.092]	0	0.0176204	555	0.0617253	0.0281303	0.05865	[0.042 to 0.081]	5	0.0002535
S-VLDL-FC	Free cholesterol in small VLDL	mmol/l	500	0.0445521	0.0128546	0.0435756	[0.036 to 0.053]	0	0.00335638	555	0.0580196	0.0170856	0.05732	[0.046 to 0.069]	5	0.01334
S-VLDL-TG	Triglycerides in small VLDL	mmol/l	500	0.14712	0.0441062	0.145566	[0.116 to 0.177]	0	0.0560983	555	0.211969	0.0610127	0.2064	[0.169 to 0.25]	5	0.07987
XS-VLDL-P	Concentration of very small VLDL particles	mmol/l	500	4.34249e-05	9.60234e-06	4.22e-05	[0 to 0]	0	1.85e-05	555	2.96428e-08	6.22505e-09	2.91e-08	[0 to 0]	0	9.68e-09
XS-VLDL-L	Total lipids in very small VLDL	mmol/l	500	0.283773	0.0623678	0.276179	[0.242 to 0.326]	0	0.12996	555	0.36788	0.0794436	0.3603	[0.316 to 0.419]	0	0.1127
XS-VLDL-PL	Phospholipids in very small VLDL	mmol/l	500	0.0834062	0.0191478	0.0810295	[0.071 to 0.096]	0	0.0393923	555	0.108738	0.0252985	0.1074	[0.092 to 0.124]	0	0.02596
XS-VLDL-C	Cholesterol in very small VLDL	mmol/l	500	0.135611	0.0319097	0.131627	[0.113 to 0.157]	0	0.0591453	555	0.161036	0.0414585	0.1577	[0.134 to 0.187]	0	0.04357
XS-VLDL-CE	Cholesteryl esters in very small VLDL	mmol/l	500	0.0914444	0.0222619	0.0892674	[0.075 to 0.106]	0	0.0383973	555	0.105971	0.0287857	0.1036	[0.087 to 0.125]	0	0.02888
XS-VLDL-FC	Free cholesterol in very small VLDL	mmol/l	500	0.0441669	0.0100756	0.0429138	[0.037 to 0.051]	0	0.020748	555	0.0550645	0.0137401	0.05406	[0.046 to 0.063]	0	0.007741
XS-VLDL-TG	Triglycerides in very small VLDL	mmol/l	500	0.064756	0.0153406	0.0635954	[0.054 to 0.073]	0	0.0285686	555	0.0981034	0.0207803	0.09695	[0.083 to 0.112]	0	0.04321
IDL-P	Concentration of IDL particles	mmol/l	500	0.00023676	4.96621e-05	0.000233591	[0 to 0]	0	9.61e-05	555	7.86744e-08	1.71915e-08	7.8e-08	[0 to 0]	0	2.46e-08
IDL-L	Total lipids in IDL	mmol/l	500	0.966159	0.20953	0.941474	[0.826 to 1.091]	0	0.317445	555	0.783927	0.176992	0.7783	[0.668 to 0.906]	0	0.236
IDL-PL	Phospholipids in IDL	mmol/l	500	0.232565	0.0479011	0.226932	[0.198 to 0.264]	0	0.0725537	555	0.21978	0.0450865	0.2182	[0.191 to 0.249]	0	0.084
IDL-C	Cholesterol in IDL	mmol/l	500	0.63938	0.151635	0.624696	[0.535 to 0.736]	0	0.206712	555	0.460755	0.119749	0.4544	[0.384 to 0.538]	0	0.1117
IDL-CE	Cholesteryl esters in IDL	mmol/l	500	0.475977	0.114753	0.466944	[0.399 to 0.55]	0	0.156082	555	0.326718	0.0860473	0.322	[0.272 to 0.385]	0	0.08031
IDL-FC	Free cholesterol in IDL	mmol/l	500	0.163403	0.0377401	0.160105	[0.136 to 0.187]	0	0.05063	555	0.13404	0.0346694	0.1337	[0.112 to 0.155]	0	0.02384
IDL-TG	Triglycerides in IDL	mmol/l	500	0.0942143	0.0197623	0.0914139	[0.081 to 0.106]	0	0.0381796	555	0.103389	0.0212647	0.1019	[0.088 to 0.117]	0	0.04028
L-LDL-P	Concentration of large LDL particles	mmol/l	500	0.000605171	0.000123194	0.000592798	[0.001 to 0.001]	0	0.000189146	555	1.26232e-07	3.06572e-08	1.25e-07	[0 to 0]	0	2.88e-08
L-LDL-L	Total lipids in large LDL	mmol/l	500	1.32063	0.301825	1.29409	[1.114 to 1.503]	0	0.100801	555	0.893155	0.220648	0.8858	[0.754 to 1.039]	0	0.2042
L-LDL-PL	Phospholipids in large LDL	mmol/l	500	0.294614	0.0637933	0.288111	[0.251 to 0.333]	0	0.0645763	555	0.240595	0.046202	0.2389	[0.211 to 0.272]	0	0.09527
L-LDL-C	Cholesterol in large LDL	mmol/l	500	0.931078	0.226367	0.911954	[0.779 to 1.072]	0	0.00696755	555	0.567265	0.163475	0.558	[0.461 to 0.672]	0	0.06882
L-LDL-CE	Cholesteryl esters in large LDL	mmol/l	500	0.692446	0.168269	0.678307	[0.576 to 0.797]	0	4.77e-08	555	0.39199	0.123751	0.3834	[0.31 to 0.473]	0	0.02144
L-LDL-FC	Free cholesterol in large LDL	mmol/l	500	0.238632	0.0591223	0.233133	[0.198 to 0.274]	0	0.0069675	555	0.175272	0.040139	0.1743	[0.15 to 0.2]	0	0.04738
L-LDL-TG	Triglycerides in large LDL	mmol/l	500	0.094939	0.0203359	0.0925983	[0.081 to 0.105]	0	0.0292572	555	0.0852966	0.0184633	0.08344	[0.073 to 0.097]	0	0.02409
M-LDL-P	Concentration of medium LDL particles	mmol/l	500	0.000237098	5.59809e-05	0.000231357	[0 to 0]	0	6.27e-05	555	1.00592e-07	2.71432e-08	9.93e-08	[0 to 0]	4	3.2e-08
M-LDL-L	Total lipids in medium LDL	mmol/l	500	0.51976	0.128513	0.509875	[0.434 to 0.603]	0	0.0286563	555	0.512096	0.138038	0.5053	[0.427 to 0.598]	4	0.1652
M-LDL-PL	Phospholipids in medium LDL	mmol/l	500	0.138761	0.0326865	0.135601	[0.117 to 0.159]	0	0.0167155	555	0.153687	0.0292146	0.1541	[0.138 to 0.172]	4	0.07645
M-LDL-C	Cholesterol in medium LDL	mmol/l	500	0.348858	0.0909019	0.340668	[0.288 to 0.405]	0	0.00410706	555	0.316955	0.1045	0.3113	[0.251 to 0.38]	4	0.06004
M-LDL-CE	Cholesteryl esters in medium LDL	mmol/l	500	0.248073	0.066359	0.241616	[0.202 to 0.289]	0	3.67e-08	555	0.208705	0.0845507	0.2049	[0.154 to 0.259]	5	0.005815
M-LDL-FC	Free cholesterol in medium LDL	mmol/l	500	0.100785	0.0258731	0.0988744	[0.084 to 0.116]	0	0.00410702	555	0.108247	0.0211162	0.1082	[0.096 to 0.121]	4	0.05395
M-LDL-TG	Triglycerides in medium LDL	mmol/l	500	0.0321418	0.00763349	0.0312912	[0.027 to 0.036]	0	0.00783379	555	0.0414568	0.00955701	0.04126	[0.035 to 0.048]	4	0.02001
S-LDL-P	Concentration of small LDL particles	mmol/l	500	0.000143784	2.6489e-05	0.000141425	[0 to 0]	0	6.32e-05	555	1.21369e-07	3.00904e-08	1.2e-07	[0 to 0]	4	4.11e-08
S-LDL-L	Total lipids in small LDL	mmol/l	500	0.247876	0.0493042	0.243252	[0.215 to 0.28]	0	0.0667227	555	0.340586	0.0849842	0.3374	[0.29 to 0.393]	4	0.1143
S-LDL-PL	Phospholipids in small LDL	mmol/l	500	0.0814954	0.01468	0.0799617	[0.071 to 0.091]	0	0.0342109	555	0.116763	0.0202798	0.1176	[0.107 to 0.128]	4	0.055
S-LDL-C	Cholesterol in small LDL	mmol/l	500	0.152151	0.0329483	0.149315	[0.131 to 0.174]	0	0.0272308	555	0.198954	0.0630197	0.1957	[0.159 to 0.238]	4	0.04195
S-LDL-CE	Cholesteryl esters in small LDL	mmol/l	500	0.108029	0.0237918	0.106361	[0.093 to 0.123]	0	0.015328	555	0.132154	0.0509197	0.1298	[0.099 to 0.164]	4	0.007353
S-LDL-FC	Free cholesterol in small LDL	mmol/l	500	0.0441216	0.00987075	0.0432509	[0.038 to 0.05]	0	0.0119028	555	0.0668017	0.0132054	0.06657	[0.059 to 0.075]	4	0.02822
S-LDL-TG	Triglycerides in small LDL	mmol/l	500	0.0142296	0.00389467	0.0139776	[0.012 to 0.016]	0	0.00528107	555	0.0248662	0.00616298	0.02467	[0.021 to 0.029]	4	0.01087
XL-HDL-P	Concentration of very large HDL particles	mmol/l	500	0.000202264	5.88709e-05	0.000197201	[0 to 0]	0	6.29e-05	555	3.99557e-07	1.39032e-07	3.92e-07	[0 to 0]	8	7.74e-08
XL-HDL-L	Total lipids in very large HDL	mmol/l	500	0.143016	0.0471646	0.138192	[0.111 to 0.171]	0	0.0234599	555	0.407034	0.142324	0.4031	[0.315 to 0.491]	8	0.07797
XL-HDL-PL	Phospholipids in very large HDL	mmol/l	500	0.0643602	0.0260505	0.0621977	[0.046 to 0.078]	0	3.78e-07	555	0.193237	0.0730867	0.1876	[0.146 to 0.236]	8	0.0379
XL-HDL-C	Cholesterol in very large HDL	mmol/l	500	0.0720538	0.0207546	0.0700279	[0.059 to 0.084]	0	0.0177544	555	0.203655	0.0721985	0.2036	[0.155 to 0.246]	8	0.02473
XL-HDL-CE	Cholesteryl esters in very large HDL	mmol/l	500	0.0497399	0.0165445	0.0481295	[0.039 to 0.059]	0	0.00811806	555	0.151318	0.0528736	0.1515	[0.116 to 0.183]	8	0.02078
XL-HDL-FC	Free cholesterol in very large HDL	mmol/l	500	0.0223139	0.00460016	0.022042	[0.019 to 0.025]	0	0.00963636	555	0.052338	0.0200852	0.05228	[0.039 to 0.064]	8	0.003942
XL-HDL-TG	Triglycerides in very large HDL	mmol/l	500	0.00660232	0.0021375	0.00633084	[0.005 to 0.008]	0	0.00165754	555	0.0101407	0.00525998	0.009887	[0.007 to 0.013]	8	0.0002686
L-HDL-P	Concentration of large HDL particles	mmol/l	500	0.00116209	0.000484556	0.00106805	[0.001 to 0.001]	0	0.000118426	555	9.14964e-07	3.32997e-07	8.92e-07	[0 to 0]	11	3.22e-07
L-HDL-L	Total lipids in large HDL	mmol/l	500	0.553691	0.202306	0.517482	[0.414 to 0.679]	0	0.0994743	555	0.57817	0.213006	0.5638	[0.445 to 0.708]	11	0.2037
L-HDL-PL	Phospholipids in large HDL	mmol/l	500	0.278449	0.0947127	0.263128	[0.211 to 0.338]	0	0.0559387	555	0.277157	0.0950156	0.2719	[0.221 to 0.338]	11	0.0738
L-HDL-C	Cholesterol in large HDL	mmol/l	500	0.248221	0.104119	0.228323	[0.175 to 0.309]	0	0.0270211	555	0.285154	0.113293	0.2751	[0.214 to 0.351]	11	0.08893
L-HDL-CE	Cholesteryl esters in large HDL	mmol/l	500	0.193534	0.0815416	0.178321	[0.136 to 0.244]	0	0.0232534	555	0.225756	0.0870521	0.2177	[0.171 to 0.276]	11	0.07323
L-HDL-FC	Free cholesterol in large HDL	mmol/l	500	0.0546877	0.022972	0.0509632	[0.039 to 0.068]	0	0.00376771	555	0.0593982	0.0263602	0.05616	[0.043 to 0.075]	11	0.01222
L-HDL-TG	Triglycerides in large HDL	mmol/l	500	0.0270203	0.00922879	0.0259342	[0.021 to 0.031]	0	0.00760339	555	0.0158551	0.00876051	0.01537	[0.01 to 0.021]	11	0.0003112
M-HDL-P	Concentration of medium HDL particles	%	500	0.00351328	0.000722678	0.00344662	[0.003 to 0.004]	0	0.00128059	555	1.70982e-06	2.64533e-07	1.69e-06	[0 to 0]	0	7.49e-07
M-HDL-L	Total lipids in medium HDL	%	500	0.955661	0.173011	0.941166	[0.836 to 1.074]	0	0.427013	555	0.720823	0.115279	0.7144	[0.649 to 0.795]	0	0.3004
M-HDL-PL	Phospholipids in medium HDL	%	500	0.447514	0.076112	0.44282	[0.394 to 0.502]	0	0.223498	555	0.344902	0.0500883	0.3432	[0.313 to 0.377]	0	0.1693
M-HDL-C	Cholesterol in medium HDL	%	500	0.460315	0.0938388	0.451239	[0.398 to 0.52]	0	0.177294	555	0.338914	0.0652505	0.3391	[0.297 to 0.383]	0	0.09836
M-HDL-CE	Cholesteryl esters in medium HDL	%	500	0.382812	0.0757021	0.375452	[0.334 to 0.431]	0	0.160559	555	0.278101	0.0519903	0.2792	[0.245 to 0.313]	0	0.08809
M-HDL-FC	Free cholesterol in medium HDL	%	500	0.0775032	0.0186154	0.0763285	[0.065 to 0.09]	0	0.016735	555	0.0608097	0.0135788	0.06048	[0.053 to 0.07]	0	0.01027
M-HDL-TG	Triglycerides in medium HDL	%	500	0.047832	0.013032	0.0470407	[0.038 to 0.056]	0	0.0148832	555	0.0370057	0.00815528	0.03662	[0.031 to 0.042]	0	0.01516
S-HDL-P	Concentration of small HDL particles	%	500	0.00927787	0.00112897	0.00927783	[0.009 to 0.01]	0	0.00485816	555	4.51685e-06	3.45461e-07	4.52e-06	[0 to 0]	0	3.33e-06
S-HDL-L	Total lipids in small HDL	%	500	1.10756	0.128708	1.10605	[1.026 to 1.186]	0	0.615068	555	0.996553	0.0779077	0.9986	[0.948 to 1.046]	0	0.7245
S-HDL-PL	Phospholipids in small HDL	%	500	0.628706	0.0739886	0.627236	[0.583 to 0.673]	0	0.363827	555	0.566471	0.0498173	0.5644	[0.536 to 0.599]	0	0.3902
S-HDL-C	Cholesterol in small HDL	%	500	0.427914	0.053569	0.427567	[0.394 to 0.457]	0	0.220038	555	0.379546	0.0514113	0.3819	[0.351 to 0.411]	0	0.1346
S-HDL-CE	Cholesteryl esters in small HDL	%	500	0.31899	0.0411378	0.318842	[0.293 to 0.34]	0	0.173474	555	0.277988	0.0487056	0.2802	[0.25 to 0.31]	0	0.04678
S-HDL-FC	Free cholesterol in small HDL	%	500	0.108925	0.0140418	0.108666	[0.1 to 0.117]	0	0.0465638	555	0.101554	0.00925111	0.1014	[0.096 to 0.107]	0	0.06839
S-HDL-TG	Triglycerides in small HDL	%	500	0.0509403	0.0110097	0.0503407	[0.044 to 0.057]	0	0.0221504	555	0.0505451	0.00833988	0.04981	[0.045 to 0.056]	0	0.02942
XXL-VLDL-PL %	Phospholipids to total lipids ratio in chylomicrons and extremely large VLDL	%	442	16.6418	4.69718	15.7353	[13.926 to 18.57]	0	1.43101	436	9.76538	2.58818	10.48	[8.901 to 11.473]	0	0.2517
XXL-VLDL-C %	Cholesterol to total lipids ratio in chylomicrons and extremely large VLDL	%	442	31.1025	16.069	25.5808	[20.295 to 35.278]	0	13.2388	436	13.9892	4.95951	14.09	[11.238 to 16.425]	0	0.8745
XXL-VLDL-CE %	Cholesteryl esters to total lipids ratio in chylomicrons and extremely large VLDL	%	442	17.6312	11.2267	13.7297	[10.581 to 20.141]	0	3.50321	436	8.04277	4.39329	7.6785	[5.474 to 9.82]	0	0.1014
XXL-VLDL-FC %	Free cholesterol to total lipids ratio in chylomicrons and extremely large VLDL	%	442	13.4713	5.89168	11.6016	[9.592 to 15.077]	0	3.93429	436	5.94669	1.76409	6.4055	[5.05 to 7.109]	0	0.2287
XXL-VLDL-TG %	Triglycerides to total lipids ratio in chylomicrons and extremely large VLDL	%	442	52.2557	19.0852	58.5538	[46.43 to 65.189]	0	0.00325235	436	76.2455	5.91267	75.27	[72.82 to 79.02]	0	33.69
XL-VLDL-PL %	Phospholipids to total lipids ratio in very large VLDL	%	496	16.5623	2.80051	17.2232	[16.031 to 18.161]	0	0.33409	404	12.3525	2.73763	12.985	[10.755 to 14.355]	0	1.327
XL-VLDL-C %	Cholesterol to total lipids ratio in very large VLDL	%	496	26.6351	7.92797	24.8365	[22.171 to 29.052]	0	11.839	404	17.9674	3.3362	17.845	[16.29 to 19.593]	0	2.631
XL-VLDL-CE %	Cholesteryl esters to total lipids ratio in very large VLDL	%	496	15.9869	7.03544	14.341	[12.071 to 17.884]	0	3.35416	404	12.2273	3.12891	11.525	[10.378 to 13.183]	0	1.91
XL-VLDL-FC %	Free cholesterol to total lipids ratio in very large VLDL	%	496	10.6481	1.43904	10.6469	[9.895 to 11.36]	0	2.44774	404	5.74008	2.10978	6.183	[4.427 to 7.298]	0	0.2163
XL-VLDL-TG %	Triglycerides to total lipids ratio in very large VLDL	%	496	56.8026	7.9095	57.606	[53.554 to 60.948]	0	0.01551	404	69.6801	4.501	69.05	[66.528 to 72.35]	0	58.46
L-VLDL-PL %	Phospholipids to total lipids ratio in large VLDL	%	500	19.6822	2.14747	19.8515	[19.085 to 20.815]	0	0.057045	501	16.9125	0.940491	17.1	[16.46 to 17.52]	0	12.84
L-VLDL-C %	Cholesterol to total lipids ratio in large VLDL	%	500	28.3442	3.84051	28.0531	[25.891 to 30.54]	0	9.02252	501	21.0702	2.22989	21.17	[20.23 to 22.39]	0	6.923
L-VLDL-CE %	Cholesteryl esters to total lipids ratio in large VLDL	%	500	14.6215	2.65147	14.3457	[12.989 to 16.259]	0	3.1007	501	13.4688	2.35191	13.08	[11.93 to 14.52]	0	5.807
L-VLDL-FC %	Free cholesterol to total lipids ratio in large VLDL	%	500	13.7227	1.36504	13.5886	[12.926 to 14.486]	0	5.92182	501	7.60105	2.22693	8.205	[6.239 to 9.272]	0	0.5833
L-VLDL-TG %	Triglycerides to total lipids ratio in large VLDL	%	500	51.9736	5.21264	52.154	[48.769 to 54.772]	0	36.6424	501	62.0174	2.8044	61.69	[60.27 to 63.24]	0	54.78
M-VLDL-PL %	Phospholipids to total lipids ratio in medium VLDL	%	500	20.998	2.03424	21.1031	[19.981 to 22.206]	0	0.0148352	554	20.2579	0.624696	20.15	[19.81 to 20.61]	0	18.64
M-VLDL-C %	Cholesterol to total lipids ratio in medium VLDL	%	500	25.81	5.68909	25.627	[22.377 to 29.685]	0	3.46693	554	23.2179	2.90242	23.29	[21.655 to 25.038]	0	8.773
M-VLDL-CE %	Cholesteryl esters to total lipids ratio in medium VLDL	%	500	13.3965	4.15383	13.2377	[10.836 to 16.157]	0	1.46854	554	12.8066	2.55556	12.705	[11.18 to 14.268]	0	4.794
M-VLDL-FC %	Free cholesterol to total lipids ratio in medium VLDL	%	500	12.4135	1.61354	12.4245	[11.514 to 13.5]	0	1.94525	554	10.4113	1.21048	10.7	[9.899 to 11.21]	0	3.711
M-VLDL-TG %	Triglycerides to total lipids ratio in medium VLDL	%	500	53.192	7.51814	53.254	[48.252 to 57.721]	0	28.7548	554	56.5242	3.08817	56.6	[54.703 to 58.29]	0	47.17
S-VLDL-PL %	Phospholipids to total lipids ratio in small VLDL	%	500	22.3098	1.62672	22.2613	[21.383 to 23.237]	0	12.3648	550	25.07	1.46192	24.89	[24.047 to 25.88]	0	21.55
S-VLDL-C %	Cholesterol to total lipids ratio in small VLDL	%	500	35.1143	4.21782	35.1499	[32.267 to 38.166]	0	22.1486	550	26.7369	4.65588	26.795	[23.83 to 29.798]	0	7.612
S-VLDL-CE %	Cholesteryl esters to total lipids ratio in small VLDL	%	500	22.2227	2.75797	22.3658	[20.264 to 24.249]	0	13.6285	550	13.6386	4.3598	13.665	[10.92 to 16.545]	0	0.142
S-VLDL-FC %	Free cholesterol to total lipids ratio in small VLDL	%	500	12.8916	1.69753	12.851	[11.912 to 13.989]	0	3.6772	550	13.0985	0.652605	13.115	[12.71 to 13.518]	0	7.47
S-VLDL-TG %	Triglycerides to total lipids ratio in small VLDL	%	500	42.5759	5.71255	42.6472	[38.642 to 46.395]	0	21.369	550	48.1931	4.2941	48.23	[45.368 to 51.09]	0	37.71
XS-VLDL-PL %	Phospholipids to total lipids ratio in very small VLDL	%	500	29.3452	1.1377	29.3997	[28.719 to 30.005]	0	20.6437	555	29.519	2.38625	29.81	[28.205 to 31.06]	0	16.54
XS-VLDL-C %	Cholesterol to total lipids ratio in very small VLDL	%	500	47.7313	3.27997	47.9662	[45.492 to 49.784]	0	36.6343	555	43.469	3.59238	43.81	[41.16 to 45.8]	0	30.58
XS-VLDL-CE %	Cholesteryl esters to total lipids ratio in very small VLDL	%	500	32.1892	3.02444	32.3246	[30.184 to 34.001]	0	22.4736	555	28.5776	3.28371	28.88	[26.665 to 30.61]	0	13.76
XS-VLDL-FC %	Free cholesterol to total lipids ratio in very small VLDL	%	500	15.5421	0.476856	15.5898	[15.354 to 15.834]	0	12.821	555	14.8911	1.27625	15.02	[14.31 to 15.695]	0	6.867
XS-VLDL-TG %	Triglycerides to total lipids ratio in very small VLDL	%	500	22.9235	2.75427	22.7928	[21.195 to 24.558]	0	14.0962	555	27.0123	4.1344	26.78	[24.105 to 29.565]	0	16.37
IDL-PL %	Phospholipids to total lipids ratio in IDL	%	500	24.1471	0.907508	24.1879	[23.615 to 24.708]	0	20.7996	555	28.2027	1.04049	28.08	[27.53 to 28.715]	0	25.81
IDL-C %	Cholesterol to total lipids ratio in IDL	%	500	65.9068	2.46895	66.1931	[64.424 to 67.625]	0	53.0738	555	58.2659	3.05898	58.63	[56.82 to 60.42]	0	43.45
IDL-CE %	Cholesteryl esters to total lipids ratio in IDL	%	500	49.0322	2.27881	49.2466	[47.644 to 50.482]	0	37.5403	555	41.2946	2.53346	41.57	[40.115 to 43.015]	0	30.85
IDL-FC %	Free cholesterol to total lipids ratio in IDL	%	500	16.8746	0.736223	16.8919	[16.463 to 17.321]	0	13.4973	555	16.9712	1.25815	17.26	[16.43 to 17.785]	0	8.414
IDL-TG %	Triglycerides to total lipids ratio in IDL	%	500	9.94614	1.86929	9.66239	[8.726 to 11.023]	0	5.67535	555	13.5316	2.69605	13.18	[11.7 to 14.945]	0	7.143
L-LDL-PL %	Phospholipids to total lipids ratio in large LDL	%	500	22.4506	1.9726	22.3383	[21.893 to 22.779]	0	20.7709	555	27.4279	2.41046	27.01	[26.095 to 28.09]	0	23.13
L-LDL-C %	Cholesterol to total lipids ratio in large LDL	%	500	70.1624	3.23999	70.4938	[69.383 to 71.413]	0	6.91218	555	62.6941	4.12007	63.62	[61.095 to 65.185]	0	29.34
L-LDL-CE %	Cholesteryl esters to total lipids ratio in large LDL	%	500	52.1732	2.71111	52.4843	[51.474 to 53.264]	0	4.73e-05	555	42.9389	4.57424	43.83	[41.16 to 45.86]	0	9.138
L-LDL-FC %	Free cholesterol to total lipids ratio in large LDL	%	500	17.9892	1.00487	18.0789	[17.483 to 18.593]	0	6.91213	555	19.755	1.00296	19.71	[19.185 to 20.21]	0	16.99
L-LDL-TG %	Triglycerides to total lipids ratio in large LDL	%	500	7.38698	1.71491	7.10096	[6.389 to 8.079]	0	4.35547	555	9.87784	2.24341	9.459	[8.434 to 10.9]	0	5.717
M-LDL-PL %	Phospholipids to total lipids ratio in medium LDL	%	500	26.8322	1.53953	26.7995	[26.465 to 27.18]	0	24.5247	551	30.8471	3.8555	30.11	[28.375 to 32.46]	0	23.81
M-LDL-C %	Cholesterol to total lipids ratio in medium LDL	%	500	66.8035	2.7754	67.1334	[66.109 to 67.99]	0	14.3321	551	60.7505	5.40175	61.94	[58.28 to 64.31]	0	35.53
M-LDL-CE %	Cholesteryl esters to total lipids ratio in medium LDL	%	500	47.4222	2.72124	47.5825	[46.456 to 48.629]	0	0.000127934	551	39.0731	7.60412	40.77	[35.77 to 44.245]	0	0.4152
M-LDL-FC %	Free cholesterol to total lipids ratio in medium LDL	%	500	19.3812	1.41721	19.5302	[18.625 to 20.278]	0	13.0212	551	21.6773	2.42084	21.22	[20.065 to 22.805]	0	17.24
M-LDL-TG %	Triglycerides to total lipids ratio in medium LDL	%	500	6.36435	1.55872	6.10561	[5.428 to 6.965]	0	3.98712	551	8.40258	1.97921	7.971	[7.084 to 9.27]	0	4.876
S-LDL-PL %	Phospholipids to total lipids ratio in small LDL	%	500	33.0413	1.65842	32.9707	[32.155 to 33.791]	0	26.6439	551	35.1384	4.31715	34.4	[32.31 to 37.1]	0	26.11
S-LDL-C %	Cholesterol to total lipids ratio in small LDL	%	500	61.1642	2.0938	61.3922	[60.077 to 62.535]	0	40.8119	551	57.3582	5.58145	58.56	[54.99 to 61.16]	0	33.48
S-LDL-CE %	Cholesteryl esters to total lipids ratio in small LDL	%	500	43.4114	1.94538	43.423	[42.477 to 44.42]	0	22.9726	551	37.4108	7.13408	38.86	[33.97 to 42.217]	0	5.025
S-LDL-FC %	Free cholesterol to total lipids ratio in small LDL	%	500	17.7528	1.37195	17.9723	[17.075 to 18.614]	0	9.33811	551	19.9473	1.8103	19.61	[18.785 to 20.83]	0	16.22
S-LDL-TG %	Triglycerides to total lipids ratio in small LDL	%	500	5.79447	1.30088	5.6734	[4.926 to 6.449]	0	3.10333	551	7.50346	1.78481	7.173	[6.229 to 8.342]	0	4.31
XL-HDL-PL %	Phospholipids to total lipids ratio in very large HDL	%	500	43.7123	5.52673	44.7827	[42.09 to 46.851]	0	0.00161034	547	47.3863	5.74343	48.08	[44.43 to 50.78]	0	25.04
XL-HDL-C %	Cholesterol to total lipids ratio in very large HDL	%	500	51.2668	4.30159	50.6702	[48.796 to 52.929]	0	41.7195	547	50.0271	5.26791	49.46	[47.04 to 53.07]	0	23.49
XL-HDL-CE %	Cholesteryl esters to total lipids ratio in very large HDL	%	500	34.8512	2.86445	34.7483	[33.487 to 36.314]	0	22.6573	547	37.3449	4.85059	36.77	[34.335 to 40.05]	0	19.58
XL-HDL-FC %	Free cholesterol to total lipids ratio in very large HDL	%	500	16.4156	3.17742	15.9344	[14.254 to 17.864]	0	10.5973	547	12.682	1.2151	12.83	[12.2 to 13.41]	0	3.745
XL-HDL-TG %	Triglycerides to total lipids ratio in very large HDL	%	500	5.021	2.3121	4.56647	[3.682 to 5.824]	0	1.70537	547	2.58682	1.40251	2.318	[1.676 to 3.136]	0	0.1174
L-HDL-PL %	Phospholipids to total lipids ratio in large HDL	%	500	50.7853	2.17623	50.5279	[49.295 to 51.824]	0	45.5247	544	48.3749	2.35461	48.215	[46.74 to 49.78]	0	36.22
L-HDL-C %	Cholesterol to total lipids ratio in large HDL	%	500	43.9659	3.77602	44.4914	[42.234 to 46.418]	0	26.6693	544	48.8508	2.47932	49.235	[47.65 to 50.48]	0	35.82
L-HDL-CE %	Cholesteryl esters to total lipids ratio in large HDL	%	500	34.2992	3.25701	34.7465	[32.768 to 36.618]	0	18.9643	544	38.852	1.6879	39.03	[37.98 to 39.83]	0	29.49
L-HDL-FC %	Free cholesterol to total lipids ratio in large HDL	%	500	9.66673	0.942474	9.83512	[9.337 to 10.278]	0	3.78762	544	9.99867	1.08429	10.195	[9.49 to 10.711]	0	5.363
L-HDL-TG %	Triglycerides to total lipids ratio in large HDL	%	500	5.24879	1.95214	4.9469	[3.989 to 6.132]	0	1.59126	544	2.77452	1.33187	2.616	[1.93 to 3.501]	0	0.1369
M-HDL-PL %	Phospholipids to total lipids ratio in medium HDL	%	500	46.9288	1.04247	46.779	[46.15 to 47.572]	0	44.249	555	47.9976	1.46172	47.73	[46.925 to 48.71]	0	45.21
M-HDL-C %	Cholesterol to total lipids ratio in medium HDL	%	500	48.0055	2.16237	48.0941	[46.606 to 49.512]	0	39.4723	555	46.7627	2.53484	47.19	[45.43 to 48.615]	0	32.75
M-HDL-CE %	Cholesteryl esters to total lipids ratio in medium HDL	%	500	39.9801	1.91424	40.0768	[38.868 to 41.421]	0	31.4575	555	38.4199	2.08837	38.81	[37.27 to 39.935]	0	28.71
M-HDL-FC %	Free cholesterol to total lipids ratio in medium HDL	%	500	8.02539	0.594923	8.08161	[7.667 to 8.418]	0	3.91909	555	8.34274	0.682344	8.458	[8.026 to 8.782]	0	3.42
M-HDL-TG %	Triglycerides to total lipids ratio in medium HDL	%	500	5.06573	1.26183	5.01149	[4.197 to 5.924]	0	1.92095	555	5.23993	1.34318	5.069	[4.311 to 5.947]	0	2.424
S-HDL-PL %	Phospholipids to total lipids ratio in small HDL	%	500	56.7605	0.993003	56.7583	[56.096 to 57.388]	0	53.4786	555	56.8914	3.31077	56.63	[54.695 to 58.8]	0	48.4
S-HDL-C %	Cholesterol to total lipids ratio in small HDL	%	500	38.6263	1.48354	38.632	[37.711 to 39.627]	0	32.6419	555	38.0101	3.62119	38.43	[35.925 to 40.43]	0	18.46
S-HDL-CE %	Cholesteryl esters to total lipids ratio in small HDL	%	500	28.7958	1.43803	28.8503	[27.942 to 29.869]	0	22.0165	555	27.8186	4.00169	28.16	[25.535 to 30.55]	0	6.417
S-HDL-FC %	Free cholesterol to total lipids ratio in small HDL	%	500	9.83052	0.480883	9.78856	[9.501 to 10.133]	0	7.57051	555	10.1918	0.501709	10.14	[9.867 to 10.475]	0	8.882
S-HDL-TG %	Triglycerides to total lipids ratio in small HDL	%	500	4.61317	0.902153	4.56909	[3.991 to 5.182]	0	2.01978	555	5.09841	0.922135	4.962	[4.466 to 5.616]	0	3.137
VLDL particle size	Average diameter for VLDL particles	nm	500	38.3929	1.17303	38.3629	[37.504 to 39.172]	0	34.5665	555	36.8972	1.10316	36.87	[36.075 to 37.62]	0	34.14
LDL particle size	Average diameter for LDL particles	nm	500	23.9041	0.0781903	23.9066	[23.861 to 23.955]	0	23.6204	555	23.5532	0.109272	23.55	[23.48 to 23.62]	0	23.27
HDL particle size	Average diameter for HDL particles	nm	500	9.5953	0.137521	9.5796	[9.497 to 9.683]	0	9.20358	555	9.90137	0.181296	9.894	[9.779 to 10.01]	0	9.419
Total-C	Total cholesterol	mmol/l	500	3.78924	0.708408	3.70997	[3.34 to 4.228]	0	0.892898	555	3.19873	0.596025	3.207	[2.827 to 3.589]	0	0.9639
VLDL-C	VLDL cholesterol	mmol/l	500	0.509264	0.153527	0.494336	[0.403 to 0.619]	0	0.129896	555	0.441656	0.143088	0.4322	[0.342 to 0.537]	0	0.08978
Remnant-C	Remnant cholesterol (non-HDL, non-LDL -cholesterol)	mmol/l	500	1.14864	0.275871	1.12093	[0.969 to 1.333]	0	0.345177	555	0.902415	0.237339	0.8968	[0.741 to 1.059]	0	0.2231
LDL-C	LDL cholesterol	mmol/l	500	1.43209	0.346047	1.40154	[1.194 to 1.642]	0	0.0383054	555	1.08368	0.328276	1.066	[0.872 to 1.292]	0	0.1242
HDL-C	HDL cholesterol	mmol/l	500	1.2085	0.234199	1.18612	[1.047 to 1.348]	0	0.509416	555	1.21263	0.218096	1.199	[1.075 to 1.347]	0	0.5897
HDL2-C	HDL2 cholesterol	mmol/l	-	-	-	-	-	-	-	555	0.754827	0.201281	0.7408	[0.628 to 0.875]	0	0.1912
HDL3-C	HDL3 cholesterol	mmol/l	-	-	-	-	-	-	-	555	0.457811	0.0223292	0.4568	[0.443 to 0.472]	0	0.3819
Esterified-C	Total esterified cholesterol	mmol/l	-	-	-	-	-	-	-	553	2.23333	0.425985	2.229	[1.956 to 2.512]	0	0.85815
Free-C	Total free cholesterol	mmol/l	-	-	-	-	-	-	-	553	0.971562	0.164768	0.9723	[0.862 to 1.081]	0	0.44605
Total triglycerides	Total triglycerides	mmol/l	500	1.11708	0.384286	1.07756	[0.824 to 1.373]	0	0.449155	555	1.10599	0.329538	1.062	[0.864 to 1.292]	0	0.4392
VLDL-TG	Triglycerides in VLDL	mmol/l	500	0.749158	0.33188	0.706813	[0.49 to 0.956]	0	0.197146	555	0.737235	0.281785	0.6914	[0.535 to 0.899]	0	0.1887
LDL-TG	Triglycerides in LDL	mmol/l	500	0.14131	0.0311101	0.137325	[0.122 to 0.157]	0	0.0423721	555	0.151824	0.0328554	0.1491	[0.128 to 0.174]	0	0.03595
HDL-TG	Triglycerides in HDL	mmol/l	500	0.132395	0.0330589	0.129965	[0.109 to 0.152]	0	0.0535685	555	0.113549	0.0241355	0.1119	[0.096 to 0.129]	0	0.05741
Phosphoglycerides	Phosphoglycerides	mmol/l	498	2.01266	0.304533	1.99641	[1.811 to 2.213]	0	0.752578	553	1.5242	0.209114	1.525	[1.398 to 1.658]	0	0.7634
TG/PG	Ratio of triglycerides to phosphoglycerides		498	0.553183	0.165168	0.533786	[0.429 to 0.663]	0	0.216627	553	0.588769	0.187388	0.5557	[0.459 to 0.697]	0	0.2023
Phosphatidylcholines	Phosphatidylcholines	mmol/l	498	1.90198	0.288233	1.89048	[1.718 to 2.102]	0	0.618558	553	1.55015	0.204767	1.543	[1.431 to 1.689]	0	0.718
Sphingomyelins	Sphingomyelins	mmol/l	498	0.405592	0.0550004	0.399063	[0.366 to 0.442]	0	0.210309	553	0.335645	0.0537553	0.3361	[0.303 to 0.373]	0	0.15745
Total cholines	Total cholines	mmol/l	498	2.28312	0.310492	2.26942	[2.074 to 2.482]	0	0.940693	553	1.90844	0.223873	1.906	[1.78 to 2.048]	0	1.063
ApoA1	Apolipoprotein A1	g/l	500	1.35791	0.190518	1.343	[1.228 to 1.477]	0	0.719939	555	1.28397	0.130331	1.28	[1.207 to 1.363]	0	0.7974
ApoB	Apolipoprotein B	g/l	500	0.685791	0.138943	0.674539	[0.594 to 0.78]	0	0.229461	555	0.670377	0.118448	0.66525	[0.589 to 0.75]	0	0.3154
ApoB/ApoA1	Ratio of apolipoprotein B to apolipoprotein A1		500	0.512359	0.114139	0.504481	[0.428 to 0.585]	0	0.22702	555	0.524983	0.094818	0.5227	[0.458 to 0.579]	0	0.2644
Total fatty acids	Total fatty acids	mmol/l	498	10.4356	1.78991	10.3312	[9.184 to 11.586]	0	4.77012	553	8.84329	1.39028	8.833	[8.009 to 9.794]	0	4.145
Unsaturation	Degree of unsaturation		498	1.25231	0.0585634	1.25341	[1.216 to 1.29]	0	1.08505	553	1.1526	0.0608129	1.146	[1.112 to 1.195]	0	0.8382
DHA	Docosahexaenoic acid	mmol/l	498	0.197136	0.0560084	0.194256	[0.162 to 0.229]	0	0.0209948	553	0.0713496	0.0269511	0.07051	[0.053 to 0.087]	1	0.00041735
LA	Linoleic acid	mmol/l	498	2.9259	0.506333	2.91136	[2.557 to 3.231]	0	0.92459	553	2.17852	0.423311	2.163	[1.905 to 2.444]	0	0.8857
Omega-3	Omega-3 fatty acids	mmol/l	498	0.356368	0.12741	0.350842	[0.27 to 0.434]	0	0.0433073	553	0.259573	0.0730386	0.2564	[0.208 to 0.3]	0	0.06166
Omega-6	Omega-6 fatty acids	mmol/l	498	3.81288	0.51191	3.81069	[3.464 to 4.137]	0	1.75495	553	2.69767	0.432779	2.692	[2.415 to 2.991]	0	1.294
PUFA	Polyunsaturated fatty acids	mmol/l	498	4.16924	0.57831	4.14364	[3.754 to 4.56]	0	1.92852	553	2.95727	0.487277	2.939	[2.649 to 3.281]	0	1.381
MUFA	Monounsaturated fatty acids	mmol/l	498	2.5561	0.616907	2.50373	[2.105 to 2.944]	0	1.1671	553	2.55412	0.515844	2.521	[2.228 to 2.855]	0	0.8414
SFA	Saturated fatty acids	mmol/l	498	3.71023	0.725134	3.63064	[3.227 to 4.135]	0	1.6745	553	3.33193	0.531546	3.349	[2.974 to 3.679]	0	1.7085
DHA %	Ratio of docosahexaenoic acid to total fatty acids	%	498	1.92047	0.52949	1.93296	[1.581 to 2.259]	0	0.147377	553	0.806065	0.28629	0.8142	[0.621 to 0.965]	1	0.00863
LA %	Ratio of linoleic acid to total fatty acids	%	498	28.174	2.85769	28.4021	[26.159 to 30.307]	0	16.8792	553	24.6184	2.71891	24.73	[23.23 to 26.11]	0	14.53
Omega-3 %	Ratio of omega-3 fatty acids to total fatty acids	%	498	3.40147	1.02304	3.33456	[2.808 to 4.043]	0	0.45835	553	2.92676	0.665132	2.883	[2.515 to 3.294]	0	1.173
Omega-6 %	Ratio of omega-6 fatty acids to total fatty acids	%	498	36.8549	2.79165	37.1733	[35.132 to 38.803]	0	25.7587	553	30.5828	2.33422	30.8	[29.32 to 32.06]	0	23.22
PUFA %	Ratio of polyunsaturated fatty acids to total fatty acids	%	498	40.2563	2.82576	40.6524	[38.555 to 42.16]	0	28.2563	553	33.5095	2.64033	33.73	[32.14 to 35.09]	0	25.12
MUFA %	Ratio of monounsaturated fatty acids to total fatty acids	%	498	24.276	2.39921	24.2028	[22.673 to 26.026]	0	17.9621	553	28.7634	2.61568	28.48	[27.06 to 30.4]	0	15.45
SFA %	Ratio of saturated fatty acids to total fatty acids	%	498	35.4677	1.9283	35.4991	[33.954 to 36.849]	0	31.0402	553	37.7271	2.08475	38.01	[36.24 to 39.13]	0	29.37
Glucose	Glucose	mmol/l	498	3.982	1.3318	4.49585	[2.887 to 4.92]	0	0.185917	555	2.66429	1.14947	3.109	[1.686 to 3.442]	6	0.01977
Lactate	Lactate	mmol/l	500	3.74206	2.4557	2.49978	[2.004 to 6.117]	0	1.09232	555	3.26659	2.27854	2.052	[1.616 to 5.706]	0	0.9337
Pyruvate	Pyruvate	mmol/l	500	0.145006	0.0996111	0.100822	[0.079 to 0.192]	0	0.0142914	553	0.195003	0.119613	0.145	[0.116 to 0.246]	0	0.04695
Citrate	Citrate	mmol/l	498	0.0632366	0.0117084	0.0617871	[0.055 to 0.07]	0	0.00184417	555	0.122317	0.0178581	0.1208	[0.11 to 0.132]	0	0.07234
Glycerol	Glycerol	mmol/l	384	0.128407	0.0460172	0.12067	[0.101 to 0.149]	0	0.0422457	528	0.104197	0.0322018	0.097845	[0.083 to 0.121]	0	0.044
Alanine	Alanine	mmol/l	499	0.376373	0.0901083	0.361976	[0.306 to 0.433]	0	0.174619	555	0.371269	0.0776696	0.3594	[0.313 to 0.419]	0	0.2226
Glutamine	Glutamine	mmol/l	498	0.640892	0.103942	0.643131	[0.573 to 0.704]	0	0.334751	554	0.430723	0.0610251	0.4295	[0.39 to 0.463]	0	0.2431
Glycine	Glycine	mmol/l	500	0.191272	0.0409184	0.186441	[0.163 to 0.218]	0	0.0885259	555	0.224074	0.0384641	0.2191	[0.198 to 0.244]	0	0.1438
Histidine	Histidine	mmol/l	500	0.0775613	0.012676	0.0770058	[0.069 to 0.085]	0	0.0447906	555	0.0677561	0.0123511	0.06723	[0.059 to 0.077]	0	0.03607
Isoleucine	Isoleucine	mmol/l	500	0.0602425	0.0228215	0.0558404	[0.044 to 0.072]	0	0.0170045	555	0.0706877	0.0221104	0.06786	[0.055 to 0.086]	0	0.02346
Leucine	Leucine	mmol/l	500	0.115078	0.0376385	0.108988	[0.09 to 0.136]	0	0.0462715	555	0.0873514	0.0275711	0.08352	[0.067 to 0.106]	0	0.03182
Valine	Valine	mmol/l	500	0.208363	0.0577453	0.193824	[0.167 to 0.235]	0	0.0935418	555	0.207734	0.0653945	0.1991	[0.16 to 0.249]	0	0.07505
Phenylalanine	Phenylalanine	mmol/l	500	0.0490046	0.0135567	0.0481331	[0.039 to 0.057]	0	0.0157195	555	0.066367	0.0133446	0.06568	[0.058 to 0.073]	0	0.03388
Tyrosine	Tyrosine	mmol/l	499	0.0684124	0.0212951	0.063837	[0.054 to 0.079]	0	0.0296964	554	0.0705052	0.0227321	0.067145	[0.055 to 0.083]	0	0.01668
Acetate	Acetate	mmol/l	500	0.0283025	0.0209816	0.0226309	[0.013 to 0.037]	0	0.00062992	555	0.0377852	0.0141885	0.03448	[0.028 to 0.043]	0	0.01668
Acetoacetate	Acetoacetate	mmol/l	500	0.0484143	0.0621653	0.0259244	[0.014 to 0.059]	2	0.000710084	555	0.0658193	0.0618873	0.05112	[0.035 to 0.078]	0	0.001827
3-hydroxybutyrate	Beta-hydroxybutyrate	mmol/l	496	0.173541	0.21437	0.100217	[0.058 to 0.206]	0	0.00770134	555	0.180074	0.148717	0.1469	[0.122 to 0.182]	0	0.06403
Creatinine	Creatinine	mmol/l	495	0.0241507	0.00379896	0.0240777	[0.022 to 0.026]	0	0.0145424	555	0.0201514	0.00467372	0.01986	[0.017 to 0.023]	0	0.005733
Albumin	Albumin	signal area	500	0.041249	0.00317577	0.0412748	[0.039 to 0.043]	0	0.0304126	555	0.0832305	0.00426239	0.08334	[0.08 to 0.086]	0	0.06513
Glycoprotein acetyls	Glycoprotein acetyls	mmol/l	500	0.776235	0.128551	0.759071	[0.684 to 0.845]	0	0.486658	555	1.22371	0.224101	1.188	[1.058 to 1.362]	0	0.6926
hsCRP	High sensitivity C-Reactive Protein	mg/L	496	1.42867	3.34502	0.14772	[0.046 to 0.939]	0	0.000190086	555	1.11071	2.73262	0.249	[0.076 to 0.956]	1	0.001
Total-PL	Total phospholipids in lipoprotein particles	mmol/l	500	2.51787	0.358746	2.50413	[2.276 to 2.732]	0	1.02786	-	-	-	-	-	-	-
VLDL-PL	Phospholipids in VLDL	mmol/l	500	0.351409	0.116252	0.343	[0.268 to 0.429]	0	0.0952863	-	-	-	-	-	-	-
LDL-PL	Phospholipids in LDL	mmol/l	500	0.51487	0.109311	0.503352	[0.44 to 0.584]	0	0.115503	-	-	-	-	-	-	-
HDL-PL	Phospholipids in HDL	mmol/l	500	1.41903	0.229518	1.39493	[1.257 to 1.574]	0	0.736859	-	-	-	-	-	-	-
Total-CE	Total esterified cholesterol	mmol/l	500	2.77082	0.516289	2.71727	[2.435 to 3.08]	0	0.647756	-	-	-	-	-	-	-
VLDL-CE	Cholesteryl esters in VLDL	mmol/l	500	0.300771	0.089225	0.291729	[0.24 to 0.366]	0	0.0793258	-	-	-	-	-	-	-
LDL-CE	Cholesteryl esters in LDL	mmol/l	500	1.04855	0.254296	1.02288	[0.876 to 1.208]	0	0.0153281	-	-	-	-	-	-	-
HDL-CE	Cholesteryl esters in HDL	mmol/l	500	0.945075	0.184635	0.926882	[0.819 to 1.053]	0	0.412092	-	-	-	-	-	-	-
Total-FC	Total free cholesterol	mmol/l	500	1.01841	0.195489	1.00058	[0.889 to 1.144]	0	0.245143	-	-	-	-	-	-	-
VLDL-FC	Free cholesterol in VLDL	mmol/l	500	0.208493	0.0670243	0.204347	[0.162 to 0.253]	0	0.0478101	-	-	-	-	-	-	-
LDL-FC	Free cholesterol in LDL	mmol/l	500	0.383538	0.0938485	0.375397	[0.319 to 0.44]	0	0.0229774	-	-	-	-	-	-	-
HDL-FC	Free cholesterol in HDL	mmol/l	500	0.263429	0.0517446	0.25977	[0.226 to 0.294]	0	0.0973233	-	-	-	-	-	-	-
Total-L	Total lipids in lipoprotein particles	mmol/l	500	7.42419	1.23379	7.33518	[6.603 to 8.189]	0	2.46073	-	-	-	-	-	-	-
VLDL-L	Total lipids in VLDL	mmol/l	500	1.60983	0.567763	1.54845	[1.197 to 1.999]	0	0.435391	-	-	-	-	-	-	-
LDL-L	Total lipids in LDL	mmol/l	500	2.08827	0.474016	2.04054	[1.767 to 2.385]	0	0.19618	-	-	-	-	-	-	-
HDL-L	Total lipids in HDL	mmol/l	500	2.75993	0.467402	2.72672	[2.421 to 3.071]	0	1.31421	-	-	-	-	-	-	-
Total-P	Total concentration of lipoprotein particles	mmol/l	500	0.0154923	0.00213859	0.0153564	[0.014 to 0.017]	0	0.00689447	-	-	-	-	-	-	-
VLDL-P	Concentration of VLDL particles	mmol/l	500	0.000114012	3.00787e-05	0.000111381	[0 to 0]	0	3.62e-05	-	-	-	-	-	-	-
LDL-P	Concentration of LDL particles	mmol/l	500	0.000986053	0.000199855	0.000967188	[0.001 to 0.001]	0	0.000315053	-	-	-	-	-	-	-
HDL-P	Concentration of HDL particles	mmol/l	500	0.0141555	0.00204985	0.0140218	[0.013 to 0.015]	0	0.00644718	-	-	-	-	-	-	-
non-HDL-C	Total cholesterol minus HDL-C	mmol/l	500	2.58073	0.608824	2.51712	[2.175 to 2.958]	0	0.383483	-	-	-	-	-	-	-
Clinical-LDL-C	Clinical LDL cholesterol	mmol/l	500	1.98742	0.544903	1.93304	[1.617 to 2.322]	0	0.0383054	-	-	-	-	-	-	-
Acetone	Acetone	mmol/l	500	0.0340868	0.0274007	0.0270959	[0.018 to 0.039]	0	0.00911347	-	-	-	-	-	-	-
PUFA/MUFA	Ratio of polyunsaturated fatty acids to monounsaturated fatty acids		498	1.68343	0.268861	1.67692	[1.494 to 1.847]	0	0.877591	-	-	-	-	-	-	-
Omega-6/Omega-3	Ratio of omega-6 fatty acids to omega-3 fatty acids		498	12.3834	6.69425	10.8854	[8.906 to 13.418]	0	4.96836	-	-	-	-	-	-	-
Total BCAA	Total concentration of branched-chain amino acids (leucine + isoleucine + valine)	mmol/l	500	0.383683	0.115108	0.361213	[0.303 to 0.443]	0	0.177571	-	-	-	-	-	-	-
Measures had their lowest non-zero value (considered as the lower limit of detection for that measure) added to them prior to log-transformation.

## Sheet: Supp. File 2B
Supplementary File 2B. Distribution of LC/MS lipidomic measures in cohort.
			6 months of age							12 months of age
Measure	Class Name	Units	N	Mean	SD	Median	IQR	n with zero value	Lowest non-zero value	N	Mean	SD	Median	IQR	n with zero value	Lowest non-zero value
Total Sph	Sphingosines	pmol/mL	501	145.4	44.1043	130.151	[116.272 to 161.85]	0	86.0954	550	150.138	46.3945	133.943	[118.599 to 174.726]	0	89.3481
Total S1P	Sphingosine phosphates	pmol/mL	501	1856.28	669.871	1688.53	[1348.897 to 2245.263]	0	629.398	550	1662.13	642.33	1469.84	[1186.834 to 1998.548]	0	556.251
Total dhCer	Dihydro-ceramides	pmol/mL	501	1347.97	442.376	1280.55	[1042.555 to 1558.195]	0	318.641	550	1134.93	315.872	1093.7	[920.176 to 1317.356]	0	352.742
Total Cer	Ceramides	pmol/mL	501	15407.4	4082.49	15226.3	[12827.466 to 17718.117]	0	3321.76	550	16117.9	4333.39	15743.5	[13396.617 to 18661.776]	0	3992.29
Total C1P	Ceramide-1-phosphate	pmol/mL	501	3.74437	1.13636	3.70683	[2.982 to 4.362]	0	0.868662	550	3.54004	1.10049	3.50293	[2.768 to 4.149]	0	0.975838
Total MHC	Hexosyl-ceramides	pmol/mL	501	8284.92	2470.1	7898.67	[6507.354 to 9794.618]	0	2987.59	550	6570.59	2088	6186.75	[5093.34 to 7558.071]	0	2513.93
Total DHC	Di-hexosyl-ceramides	pmol/mL	501	3092.3	863.927	2934.11	[2482.914 to 3586.589]	0	1095.76	550	3228.31	929.253	3126.16	[2567.95 to 3670.083]	0	1010.04
Total THC	Tri-hexosyl-ceramides	pmol/mL	501	2032.61	473.978	1993.49	[1700.656 to 2309.576]	0	554.086	550	1928.71	436.694	1917.5	[1621.017 to 2169.865]	0	718.685
Total GM3	GM3-gangliosides	pmol/mL	501	2126.46	497.044	2085.89	[1766.33 to 2446.455]	0	529.715	550	1768.4	380.118	1724.03	[1514.263 to 1956.468]	0	799.308
Total GM1	GM1-gangliosides	pmol/mL	501	86.9792	18.7863	86.5207	[74.475 to 97.988]	0	26.0751	550	80.5279	18.0739	79.7301	[67.946 to 92.347]	0	33.7901
Total Sulfatide	Sulfatides	pmol/mL	501	2160.43	581.744	2092.68	[1782.734 to 2492.373]	0	691.852	550	2406.72	633.135	2334.75	[1999.57 to 2742.279]	0	789.658
Total SM	Sphingomyelins	pmol/mL	501	407295	88189.4	401305	[354023.75 to 454869.81]	0	70188.8	550	391291	80641.7	386564	[345914.22 to 429311.505]	0	114298
Total PA	Phosphatidic acid	pmol/mL	501	88.9329	46.3124	69.972	[57.123 to 113.361]	0	26.267	550	90.364	55.2885	69.055	[56.288 to 114.369]	0	32.743
Total PC	Phosphatidylcholines	pmol/mL	501	598671	88890.1	601828	[545881.44 to 653313.63]	0	146675	550	591372	90919.3	596365	[540756.858 to 648454.31]	0	224233
Total PC_O	Alkyl phosphatidylcholines	pmol/mL	501	26871.4	6005	26722.7	[23173.604 to 30537.568]	0	5083.69	550	26645.8	5472.28	26578.9	[22946.827 to 29577.867]	0	8090.16
Total PC_P	Alkenyl phosphatidylcholines	pmol/mL	501	14237.8	4522.86	14073.9	[10864.805 to 17165.207]	0	2774.39	550	13794.8	3911.47	13500.7	[11076.297 to 16036.32]	0	3847.08
Total LPC	Lysophosphatidylcholines	pmol/mL	501	189059	64383.5	177159	[144656.72 to 221901.92]	0	31449.4	550	169512	69660.9	153921	[120444.605 to 202067.348]	0	38321.8
Total LPC_O	Lysoalkyl phosphatidylcholines	pmol/mL	501	3223.07	1290.84	2838.5	[2328.34 to 3829.701]	0	718.997	550	3107.62	1421.38	2606.2	[2097.169 to 3845.087]	0	805.071
Total LPC_P	Lysoalkenyl phosphatidylcholines	pmol/mL	501	251.387	113.754	226.719	[171.635 to 299.413]	0	60.6494	550	241.105	120.262	206.948	[153.256 to 300.447]	0	50.0125
Total PE	Phosphatidylethanolamines	pmol/mL	501	70138.5	24230.4	67476.7	[52211.914 to 84915.117]	0	20294.8	550	78290.2	24814.1	76391.9	[60415.612 to 94437.51]	0	18870.6
Total PE_O	Alkylphosphatidylethanolamines	pmol/mL	501	9355.06	4290.63	8867.03	[5910.676 to 12040.635]	0	1251.44	550	7936.31	3087.16	7441.52	[5862.792 to 9241.068]	0	2239.47
Total PE_P	Alkenylphosphatidylethanolamines	pmol/mL	501	149513	46914	147088	[110208.05 to 183363.23]	0	25032.9	550	122549	35416.6	117214	[99220.286 to 138843.4]	0	36636.4
Total LPE	Lysophosphatidylethanolamines	pmol/mL	501	11427.6	3625.64	11105.8	[8798.701 to 13607.443]	0	2002.5	550	9360.08	3198.79	8964.97	[7154.23 to 11351.924]	0	2471.77
Total LPE_P	Lysoalkenylphosphatidylethanolamines	pmol/mL	501	305.709	149.674	270.831	[197.999 to 356.976]	0	60.1691	550	265.027	147.355	213.201	[165.663 to 317.683]	0	68.1561
Total PI	Phosphatidylinositols	pmol/mL	501	83411.7	18179	82786.4	[71970.641 to 93815.039]	0	21949.2	550	82940.2	17685.3	83275	[71783.529 to 93303.625]	0	26272.2
Total PIP1	Phosphatidylinositol phosphate	pmol/mL	501	6.17294	2.02303	5.90991	[4.712 to 7.17]	0	2.08828	550	6.00372	2.11616	5.61579	[4.616 to 6.997]	0	2.13633
Total LPI	Lysophosphatidylinositols	pmol/mL	501	3132.66	925.297	2989.49	[2513.065 to 3704.35]	0	436.452	550	2534.19	733.223	2425.77	[1998.001 to 2932.995]	0	585.937
Total PS	Phosphatidylserines	pmol/mL	501	3763.58	2925.01	2559.79	[1746.733 to 4690.398]	0	572.558	550	3554.64	3295.23	2527.15	[1749.993 to 4333.574]	0	797.192
Total PG	Phosphatidylglycerols	pmol/mL	501	168.5	67.8781	157.755	[120.889 to 208.036]	0	41.9478	550	191.823	73.2602	182.625	[140.313 to 237.635]	0	26.5349
Total CE	Cholesteryl esters	pmol/mL	501	2.48124e+06	395477	2.45766e+06	[2226838.3 to 2711975]	0	724037	550	2.50541e+06	375560	2.51149e+06	[2281369.125 to 2741623.925]	0	1.21729e+06
Total COH	Free cholesterol	pmol/mL	501	531326	88340.8	529545	[477816.28 to 583948.88]	0	217399	550	512929	83142.4	509232	[463204.973 to 559324.958]	0	239510
Total DE	Dehydro-cholesteryl esters	pmol/mL	501	9332.48	4291.22	8586.65	[6212.562 to 11647.188]	0	2122.63	550	7252.16	3289.8	6803.17	[4783.692 to 9080.329]	0	1525.28
Total FFA	Free fatty acids	pmol/mL	501	757987	316808	678948	[555732.88 to 900748]	0	317237	550	632131	307947	545359	[436457.57 to 742208.623]	0	286013
Total Acylcarnitine	Acylcarnitines	pmol/mL	501	391.902	165.541	351.838	[268.348 to 468.825]	0	58.752	550	309.435	157.225	258.338	[193.001 to 394.638]	0	64.2763
Total DG	Diacylglycerols	pmol/mL	501	290555	146309	261490	[189902.45 to 363317.69]	0	63892.6	550	264578	137525	234880	[165582.168 to 324021.46]	0	57187.6
Total TG	Triacylglycerols	pmol/mL	501	1.41608e+06	374829	1.38106e+06	[1163375.4 to 1638648.5]	0	548495	550	1.323e+06	395218	1.27461e+06	[1063808.6 to 1521599.45]	0	486040
Total TG_O	Alkyldiacylglycerols	pmol/mL	501	8855.92	13440.3	6472.01	[3054.786 to 10890.268]	0	1731.46	550	4194.15	2085.49	3601.45	[3100.784 to 4476.947]	0	1699.68
Total Ubiquinone	Ubiquinone	pmol/mL	501	15581.4	5988.86	14644.4	[11561.871 to 19054.598]	0	2043.15	550	16069	6259.66	15022.5	[11677.104 to 19235.982]	0	3610.82
Total OxSpecies	Oxidised species	pmol/mL	501	4435.21	2923.67	3879.49	[3072.481 to 5043.89]	0	872.461	550	5937.4	3582.68	5250.58	[4117.651 to 6658.639]	0	1032.95
Sph(d16:1)		pmol/mL	501	19.7742	2.91025	19.5189	[17.838 to 21.251]	0	12.6845	550	19.8112	3.04429	19.5451	[17.696 to 21.454]	0	13.3235
Sph(d18:1)		pmol/mL	501	89.3615	42.2605	74.4045	[60.441 to 104.487]	0	36.5036	550	93.6942	44.7152	77.7578	[62.675 to 114.625]	0	39.1107
Sph(d18:2)		pmol/mL	501	36.2646	3.65241	36.4002	[33.676 to 38.808]	0	22.4435	550	36.6331	3.76026	36.5679	[34.32 to 39.305]	0	26.7352
S1P(d16:1)		pmol/mL	501	308.75	136.511	266.736	[213.022 to 371.479]	0	82.1435	550	233.2	92.1944	207.973	[167.525 to 288.541]	0	74.164
S1P(d18:0)		pmol/mL	501	129.799	56.4119	113.389	[89.355 to 153.607]	0	42.1041	550	128.681	61.3796	108.559	[85.731 to 156.004]	0	29.4523
S1P(d18:1)		pmol/mL	501	1144.31	426.88	1027.73	[836.715 to 1376.629]	0	397.209	550	1054.21	429.75	928.753	[743.266 to 1261.189]	0	336.486
S1P(d18:2)		pmol/mL	501	273.419	100.36	247.683	[198.906 to 339.354]	0	85.4905	550	246.041	93.6225	221.217	[175.619 to 298.273]	0	77.1077
Cer(d18:0/16:0)		pmol/mL	501	56.5475	15.4002	54.6978	[46.269 to 65.619]	0	13.8803	550	57.5134	16.5832	55.2931	[46.164 to 67.275]	0	20.5085
Cer(d18:0/18:0)		pmol/mL	501	40.072	22.4726	35.7998	[21.983 to 52.136]	0	5.08875	550	35.7391	14.1813	33.5066	[25.436 to 43.027]	0	11.8443
Cer(d18:0/20:0)		pmol/mL	501	92.4819	32.6464	88.5962	[66.783 to 111.136]	0	27.3547	550	80.5243	21.7249	77.2989	[66.173 to 92.49]	0	35.1797
Cer(d18:0/22:0)		pmol/mL	501	486.021	150.328	461.632	[385.818 to 565.641]	0	131.203	550	411.957	117.923	399.218	[336.368 to 477.47]	0	129.69
Cer(d18:0/24:0)		pmol/mL	501	396.807	131.504	372.364	[310.744 to 464.154]	0	100.097	550	326.187	102.809	311.923	[255.208 to 379.021]	0	106.353
Cer(d18:0/24:1)		pmol/mL	501	276.043	136.342	255.339	[165.213 to 351.742]	0	40.4586	550	223.012	81.9044	209.059	[168.945 to 264.292]	0	44.9217
Cer(d16:1/16:0)		pmol/mL	501	31.843	14.1119	29.3535	[21.891 to 39.273]	0	4.75855	550	34.0305	14.0331	32.0783	[23.899 to 42.146]	0	5.14127
Cer(d16:1/18:0)		pmol/mL	501	28.8651	10.9848	27.3562	[21.049 to 35.649]	0	5.02722	550	33.3277	15.1682	30.9383	[22.447 to 42.423]	0	5.24948
Cer(d16:1/20:0)		pmol/mL	501	38.5233	16.2014	35.3593	[27.495 to 47.517]	0	7.81098	550	32.9259	13.4149	30.8783	[23.141 to 39.278]	0	7.02677
Cer(d16:1/22:0)		pmol/mL	501	317.152	235.591	239.383	[169.282 to 395.92]	0	30.0272	550	220.739	108.243	198.816	[145.473 to 280.636]	0	41.14
Cer(d16:1/23:0)		pmol/mL	501	211.611	215.852	141.752	[91.878 to 248.926]	0	16.5983	550	214.709	154.102	184.691	[121.022 to 269.041]	0	30.289
Cer(d16:1/24:0)		pmol/mL	501	763.592	673.956	541.508	[363.589 to 944.05]	0	67.2239	550	557.056	282.853	512.26	[365.979 to 685.761]	0	142.956
Cer(d16:1/24:1)		pmol/mL	501	147.579	62.8704	134.724	[105.513 to 180.085]	0	21.0556	550	144.902	60.9632	136.43	[100.729 to 179.596]	0	28.1024
Cer(d17:1/16:0)		pmol/mL	501	20.2322	6.57395	19.3286	[15.754 to 23.88]	0	4.57012	550	24.7595	8.55292	23.8964	[18.806 to 29.239]	0	5.73783
Cer(d17:1/18:0)		pmol/mL	501	8.15308	2.51696	7.82075	[6.4 to 9.515]	0	3.33619	550	10.3787	3.57025	9.77079	[7.792 to 12.46]	0	3.06924
Cer(d17:1/20:0)		pmol/mL	501	5.96901	2.05249	5.68406	[4.572 to 6.951]	0	1.7149	550	6.70965	2.34408	6.3413	[4.961 to 8.036]	0	1.98062
Cer(d17:1/22:0)		pmol/mL	501	77.6846	31.3785	73.034	[57.041 to 91.076]	0	17.4332	550	86.5141	37.0387	80.5375	[61.95 to 104.655]	0	23.7291
Cer(d17:1/23:0)		pmol/mL	501	76.0164	44.5209	66.0526	[50.083 to 90.368]	0	9.67197	550	122.881	75.4765	102.076	[73.108 to 156.922]	0	18.172
Cer(d17:1/24:0)		pmol/mL	501	246.03	112.805	226.092	[173.8 to 293.009]	0	40.4557	550	279.698	120.142	258.161	[196.467 to 342.447]	0	64.3765
Cer(d17:1/24:1)		pmol/mL	501	87.7209	31.235	83.6835	[64.769 to 106.129]	0	12.9135	550	116.451	47.7632	107.33	[84.06 to 143.141]	0	21.1967
Cer(d18:1/14:0)		pmol/mL	501	15.1791	5.41011	14.4734	[11.587 to 18.018]	0	3.45447	550	17.2844	6.22824	16.3907	[13.338 to 20.335]	0	2.94671
Cer(d18:1/16:0)		pmol/mL	501	350.472	86.6565	349.635	[290.369 to 403.331]	0	100.994	550	368.696	87.6794	362.429	[313.28 to 412.582]	0	122.022
Cer(d18:1/17:0)		pmol/mL	501	21.9868	7.34193	20.9111	[16.906 to 26.707]	0	6.0714	550	23.2571	7.22667	22.605	[18.101 to 27.392]	0	5.81044
Cer(d18:1/18:0)		pmol/mL	501	83.7816	33.9083	79.4198	[57.788 to 103.863]	0	17.4207	550	98.4936	34.1143	92.4549	[77.769 to 113.825]	0	29.3395
Cer(d18:1/19:0)		pmol/mL	501	4.38546	1.67692	4.13547	[3.163 to 5.306]	0	0.676081	550	5.76239	2.16125	5.46277	[4.22 to 6.73]	0	1.48852
Cer(d18:1/20:0)		pmol/mL	501	242.987	89.7859	230.148	[179.47 to 292.804]	0	49.8262	550	235.421	76.5487	223.408	[182.914 to 278.141]	0	56.5137
Cer(d18:1/21:0)		pmol/mL	501	39.9739	14.8695	38.2528	[30.001 to 46.257]	0	9.66127	550	48.3533	18.1719	45.8782	[36.066 to 57.307]	0	12.4163
Cer(d18:1/22:0)		pmol/mL	501	2253.43	636.923	2204.73	[1852.502 to 2591.194]	0	424.24	550	2119.72	609.545	2057.76	[1714.724 to 2481.43]	0	534.065
Cer(d18:1/23:0)		pmol/mL	501	1687.32	531.43	1620.97	[1336.555 to 2013.14]	0	123.468	550	2212.07	762.849	2127.76	[1689.309 to 2640.416]	0	701.457
Cer(d18:1/24:0)		pmol/mL	501	4224.36	1174.2	4222.08	[3390.209 to 4974.446]	0	759.82	550	4025.31	1098.99	3916.66	[3263.727 to 4653.588]	0	960.396
Cer(d18:1/24:1)		pmol/mL	501	1915.05	706.196	1851.24	[1408.676 to 2305.295]	0	339.459	550	1933.57	592.869	1860.41	[1506.8 to 2253.953]	0	312.784
Cer(d18:1/26:0)		pmol/mL	501	65.2219	18.0166	63.6867	[54.366 to 73.576]	0	20.2673	550	99.7259	29.7464	96.373	[78.62 to 116.778]	0	35.9805
Cer(d18:2/14:0)		pmol/mL	501	2.75026	0.744836	2.65209	[2.196 to 3.204]	0	1.33651	550	3.13358	0.874057	3.04475	[2.505 to 3.645]	0	1.05656
Cer(d18:2/16:0)		pmol/mL	501	28.0852	9.1571	26.782	[21.657 to 33.696]	0	2.91679	550	30.6194	8.38053	29.732	[24.837 to 36.22]	0	8.76329
Cer(d18:2/17:0)		pmol/mL	501	0.923999	0.533669	0.825783	[0.54 to 1.217]	0	0.0147364	550	1.13588	0.597299	1.03912	[0.694 to 1.456]	0	0.0219574
Cer(d18:2/18:0)		pmol/mL	501	13.8011	5.26968	13.2752	[9.731 to 17.22]	0	2.66861	550	16.1097	5.41928	15.6615	[12.286 to 19.435]	0	4.21198
Cer(d18:2/20:0)		pmol/mL	501	13.8971	4.35952	13.8029	[10.795 to 16.805]	0	3.74435	550	14.1968	4.62378	13.6029	[11.084 to 16.789]	0	3.33497
Cer(d18:2/21:0)		pmol/mL	501	3.17908	0.898517	2.99817	[2.565 to 3.705]	0	1.01496	550	3.62028	0.986808	3.4949	[2.87 to 4.224]	0	1.31756
Cer(d18:2/22:0)		pmol/mL	501	241.094	81.7969	232.144	[183.5 to 291.278]	0	53.2838	550	244.627	88.5226	231.922	[182.982 to 288.794]	0	47.1395
Cer(d18:2/23:0)		pmol/mL	501	197.543	85.3836	184.201	[136.514 to 241.836]	0	20.9445	550	273.797	113.351	262.271	[194.146 to 331.452]	0	69.9585
Cer(d18:2/24:0)		pmol/mL	501	650.427	231.652	623.865	[484.098 to 798.209]	0	116.65	550	672.925	229.219	658.911	[515.739 to 797.479]	0	124.124
Cer(d18:2/24:1)		pmol/mL	501	198.36	69.9508	193.944	[145.985 to 243.845]	0	39.1749	550	227.432	83.6984	216.145	[167.163 to 278.165]	0	42.0595
Cer(d18:2/26:0)		pmol/mL	501	7.18956	2.39211	7.00333	[5.498 to 8.61]	0	1.51422	550	12.8894	4.87253	12.3549	[9.571 to 15.335]	0	2.60352
Cer(d19:1/16:0)		pmol/mL	501	3.27424	1.6849	3.04462	[2.013 to 4.315]	0	0.384074	550	4.92378	2.15949	4.68462	[3.346 to 6.175]	0	0.621718
Cer(d19:1/18:0)		pmol/mL	501	3.36232	2.46364	3.05827	[1.196 to 4.905]	0	0.202764	550	6.41469	4.72013	5.52038	[3.725 to 8.044]	0	0.474227
Cer(d19:1/20:0)		pmol/mL	501	10.906	5.35712	10.162	[6.678 to 13.973]	0	2.39666	550	15.6387	6.79888	14.5826	[11.041 to 19.081]	0	3.78977
Cer(d19:1/22:0)		pmol/mL	501	85.6883	53.9805	81.3694	[37.849 to 119.229]	0	8.34566	550	147.208	72.4063	135.636	[95.79 to 186.546]	0	14.5872
Cer(d19:1/23:0)		pmol/mL	501	84.3069	51.546	77.8703	[40.442 to 115.399]	0	7.03254	550	216.125	124.995	191.283	[121.851 to 286.584]	0	16.9265
Cer(d19:1/24:0)		pmol/mL	501	247.312	150.395	232.542	[117.735 to 337.941]	0	24.7762	550	434.278	187.327	420.326	[297.029 to 548.943]	0	33.4341
Cer(d19:1/24:1)		pmol/mL	501	141.217	103.697	135.745	[41.719 to 213.468]	0	8.29009	550	232.991	108.741	220.568	[160.192 to 293.705]	0	11.1197
Cer(d19:1/26:0)		pmol/mL	501	8.92838	3.11558	8.49195	[6.764 to 10.461]	0	2.54012	550	14.5634	5.79469	13.6653	[10.297 to 18.107]	0	2.43103
Cer(d20:1/22:0)		pmol/mL	501	30.5613	12.6731	28.3983	[21.963 to 36.322]	0	8.99208	550	26.761	8.84019	25.2281	[20.834 to 31.208]	0	9.70399
Cer(d20:1/23:0)		pmol/mL	501	18.2044	7.04064	17.0674	[13.472 to 21.335]	0	3.93441	550	21.6733	9.03848	19.8664	[15.905 to 25.491]	0	6.82684
Cer(d20:1/24:0)		pmol/mL	501	37.9038	13.8991	35.5284	[28.994 to 45.887]	0	7.90651	550	34.0611	11.2984	32.8858	[26.495 to 39.833]	0	8.99533
Cer(d20:1/24:1)		pmol/mL	501	33.1205	17.5275	30.7342	[18.47 to 44.135]	0	5.84726	550	27.068	10.7131	25.1055	[19.304 to 32.707]	0	4.98774
Cer(d20:1/26:0)		pmol/mL	501	9.89595	2.95274	9.6246	[7.819 to 11.499]	0	3.33916	550	9.27614	2.89986	8.73174	[7.19 to 10.964]	0	3.83062
Cer(m18:0/20:0)		pmol/mL	501	15.4891	7.30229	14.4419	[10.061 to 19.371]	0	3.24543	550	12.9122	4.98963	11.7989	[9.283 to 16.001]	0	2.63161
Cer(m18:0/22:0)		pmol/mL	501	38.3846	13.2709	36.8133	[28.959 to 46.483]	0	8.81054	550	37.1042	12.3041	35.5499	[28.23 to 44.776]	0	8.41165
Cer(m18:0/23:0)		pmol/mL	501	16.1954	6.47544	14.9506	[11.754 to 19.64]	0	2.57226	550	23.0026	9.13551	21.8319	[16.694 to 28.203]	0	6.37559
Cer(m18:0/24:0)		pmol/mL	501	36.6529	12.6561	35.347	[27.599 to 44.507]	0	7.23822	550	39.0284	13.2318	37.4771	[29.895 to 46.424]	0	10.2954
Cer(m18:0/24:1)		pmol/mL	501	28.3347	12.3608	26.4352	[19.011 to 34.973]	0	5.49734	550	31.034	11.3379	29.5415	[23.19 to 37.242]	0	5.1729
Cer(m18:1/18:0)		pmol/mL	501	4.06509	2.51318	3.66674	[2.184 to 5.427]	0	0.151175	550	3.20914	1.43286	2.97416	[2.134 to 4.013]	0	0.604543
Cer(m18:1/20:0)		pmol/mL	501	38.9268	19.0452	35.9546	[24.484 to 50.124]	0	5.88754	550	29.9751	12.2245	27.8353	[21.315 to 36.983]	0	5.75711
Cer(m18:1/22:0)		pmol/mL	501	51.2558	20.7557	49.2056	[37.108 to 60.71]	0	9.71043	550	42.1737	17.2505	39.503	[29.536 to 51.516]	0	6.94725
Cer(m18:1/23:0)		pmol/mL	501	19.1614	8.31017	17.9542	[13.444 to 23.26]	0	4.2566	550	22.7095	9.60954	21.5961	[15.962 to 27.442]	0	4.52681
Cer(m18:1/24:0)		pmol/mL	501	84.4273	28.3895	81.1431	[64.613 to 99.909]	0	15.245	550	76.9491	27.8733	72.96	[56.662 to 91.584]	0	18.9641
Cer(m18:1/24:1)		pmol/mL	501	37.4492	17.3473	34.964	[24.723 to 46.957]	0	7.43545	550	35.6041	14.5241	33.7307	[25.532 to 43.124]	0	4.80357
Cer1P(d18:1/16:0)		pmol/mL	501	3.74437	1.13636	3.70683	[2.982 to 4.362]	0	0.868662	550	3.54004	1.10049	3.50293	[2.768 to 4.149]	0	0.975838
HexCer(d16:1/18:0)		pmol/mL	501	62.6284	29.4553	57.1091	[42.781 to 76.031]	0	15.7132	550	35.962	16.6186	32.8612	[25.302 to 42.671]	0	2.47883
HexCer(d16:1/20:0)		pmol/mL	501	112.847	48.094	102.357	[80.788 to 137.42]	0	21.5712	550	58.4234	23.706	54.8341	[41.577 to 71.005]	0	16.9241
HexCer(d16:1/22:0)		pmol/mL	501	121.362	64.629	105.855	[80.184 to 144.239]	0	25.7534	550	63.0551	24.1216	59.5596	[46.681 to 74.625]	0	14.9994
HexCer(d16:1/24:0)		pmol/mL	501	187.911	83.0511	171.17	[130.657 to 226.873]	0	53.3742	550	109.722	41.4075	103.548	[81.401 to 128.93]	0	32.1433
HexCer(d18:1/16:0)		pmol/mL	501	1577.54	556.948	1495.77	[1148.108 to 1874.202]	0	534.406	550	1456.39	641.718	1294.97	[1021.072 to 1732.319]	0	504.724
HexCer(d18:1/18:0)		pmol/mL	501	209.809	98.3992	195.625	[132.403 to 264.39]	0	49.3968	550	150.402	49.5866	140.07	[117.823 to 173.17]	0	42.3471
HexCer(d18:1/20:0)		pmol/mL	501	202.432	82.8176	188.459	[142.438 to 253.073]	0	56.138	550	139.004	48.1303	131.922	[105.991 to 158.969]	0	50.6983
HexCer(d18:1/22:0)		pmol/mL	501	1148.67	382.017	1098.93	[882.664 to 1350.884]	0	347.851	550	835.43	287.891	791.823	[641.826 to 967.007]	0	297.457
HexCer(d18:1/24:0)		pmol/mL	501	1979.97	610.961	1864.3	[1576.95 to 2341.613]	0	587.012	550	1497.67	507.052	1411.35	[1150.082 to 1760.283]	0	522.185
HexCer(d18:1/24:1)		pmol/mL	501	2205.1	841.055	2067.98	[1653.811 to 2669.337]	0	498.28	550	1896.22	703.851	1762.17	[1412.006 to 2239.266]	0	629.897
HexCer(d18:2/18:0)		pmol/mL	501	30.3909	14.8739	27.3339	[19.653 to 39.161]	0	5.89608	550	20.8957	7.61333	20.0357	[15.792 to 24.586]	0	4.18939
HexCer(d18:2/20:0)		pmol/mL	501	16.6498	8.85463	14.4476	[10.278 to 21.481]	0	2.35324	550	10.6923	4.66239	9.84439	[7.803 to 12.871]	0	0.430081
HexCer(d18:2/22:0)		pmol/mL	501	76.123	25.4485	73.3042	[57.177 to 91.433]	0	23.1597	550	50.7094	17.0975	48.1368	[38.384 to 59.694]	0	16.3938
HexCer(d18:2/24:0)		pmol/mL	501	353.487	108.987	348.655	[273.914 to 418.141]	0	94.2391	550	246.014	79.1262	235.627	[189.769 to 286.969]	0	95.8797
Hex2Cer(d16:1/16:0)		pmol/mL	501	156.931	67.9918	145.763	[106.414 to 191.095]	0	30.2131	550	148.219	63.2468	139.235	[100.87 to 183.156]	0	21.1612
Hex2Cer(d16:1/24:1)		pmol/mL	501	47.1719	18.6153	45.28	[33.879 to 57.392]	0	9.2737	550	36.1971	14.8304	34.9968	[24.944 to 44.718]	0	6.35376
Hex2Cer(d18:1/16:0)		pmol/mL	501	1497.45	493.326	1426	[1143.215 to 1786.634]	0	294.842	550	1689.96	556.084	1617.91	[1278.764 to 1995.99]	0	405.633
Hex2Cer(d18:1/18:0)		pmol/mL	501	69.9483	20.9274	68.5846	[56.444 to 81.842]	0	13.3379	550	70.3622	20.1329	68.4787	[56.57 to 81.986]	0	17.1339
Hex2Cer(d18:1/20:0)		pmol/mL	501	46.3032	16.6731	43.8724	[34.532 to 56.185]	0	11.2543	550	44.0994	17.7774	41.2621	[33.225 to 50.908]	0	11.513
Hex2Cer(d18:1/22:0)		pmol/mL	501	195.437	61.3704	185.433	[153.416 to 225.375]	0	76.3986	550	194.843	70.4216	181.223	[151.194 to 222.778]	0	78.0372
Hex2Cer(d18:1/24:0)		pmol/mL	501	390.675	112.358	372.415	[313.21 to 442.484]	0	170.749	550	395.683	122.503	378.108	[316.87 to 448.171]	0	169.869
Hex2Cer(d18:1/24:1)		pmol/mL	501	501.129	163.285	470.726	[387.237 to 591.302]	0	147.081	550	471.258	162.192	446.999	[354.464 to 555.224]	0	122.955
Hex2Cer(d18:2/16:0)		pmol/mL	501	50.1719	17.4782	47.4873	[37.528 to 61.078]	0	14.8725	550	55.3939	17.8551	54.1487	[43.11 to 64.338]	0	16.8633
Hex2Cer(d18:2/24:1)		pmol/mL	501	137.088	40.9746	130.946	[108.098 to 162.506]	0	52.1447	550	122.299	36.5594	118.696	[94.036 to 142.965]	0	42.5401
Hex3Cer(d18:1/16:0)		pmol/mL	501	936.483	215.699	924.177	[784.834 to 1072.641]	0	260.815	550	910.332	196.252	908.779	[776.299 to 1023.81]	0	348.327
Hex3Cer(d18:1/18:0)		pmol/mL	501	275.212	93.096	262.115	[206.722 to 330.839]	0	51.0112	550	265.324	87.7022	249.414	[206.47 to 307.236]	0	83.2581
Hex3Cer(d18:1/20:0)		pmol/mL	501	77.3238	26.3892	76.3989	[58.365 to 94.381]	0	13.2178	550	70.4627	23.3119	66.9735	[54.357 to 84.619]	0	18.2242
Hex3Cer(d18:1/22:0)		pmol/mL	501	236.616	65.1491	227.83	[191.313 to 271.611]	0	66.3356	550	215.505	58.9524	209.277	[174.151 to 246.441]	0	84.6996
Hex3Cer(d18:1/24:0)		pmol/mL	501	111.043	35.7346	107.144	[87.51 to 129.856]	0	24.7342	550	109.061	33.6449	104.016	[85.449 to 127.812]	0	34.6821
Hex3Cer(d18:1/24:1)		pmol/mL	501	395.93	106.803	382.69	[324.784 to 458.021]	0	97.6376	550	358.029	97.0805	344.811	[294.675 to 402.873]	0	114.816
GM3(d18:1/16:0)		pmol/mL	501	496.735	115.373	478.151	[415.379 to 555.714]	0	93.6513	550	471.353	116.637	449.087	[393.89 to 521.252]	0	194.987
GM3(d18:1/18:0)		pmol/mL	501	167.244	54.5461	160.387	[125.857 to 202.427]	0	48.6945	550	141.207	40.7907	137.399	[112.666 to 162.413]	0	38.4376
GM3(d18:1/20:0)		pmol/mL	501	509.686	160.039	489.849	[397.236 to 602.032]	0	181.039	550	419.426	112.371	408.19	[345.381 to 481.107]	0	167.807
GM3(d18:1/22:0)		pmol/mL	501	449.51	124.326	436.592	[367.928 to 529.456]	0	120.835	550	345.274	101.381	332.806	[276.647 to 408.892]	0	91.2707
GM3(d18:1/24:0)		pmol/mL	501	163.567	45.4425	158.413	[133.223 to 188.236]	0	24.5228	550	128.501	41.6757	122.403	[99.044 to 152.39]	0	32.5269
GM3(d18:1/24:1)		pmol/mL	501	339.718	128.252	332.265	[245.948 to 419.691]	0	60.2162	550	262.638	88.0294	259.248	[199.292 to 306.033]	0	78.5657
GM1(d18:1/16:0)		pmol/mL	501	86.9792	18.7863	86.5207	[74.475 to 97.988]	0	26.0751	550	80.5279	18.0739	79.7301	[67.946 to 92.347]	0	33.7901
Sulfatide (d18:1:/16:0(OH))		pmol/mL	501	124.443	41.1314	120.423	[97.773 to 149.01]	0	15.2902	550	153.556	46.9118	148.951	[122.634 to 183.188]	0	32.8348
Sulfatide (d18:1:/16:0)		pmol/mL	501	870.77	325.21	826.502	[662.447 to 1010.25]	0	141.724	550	1152.68	410.476	1087.49	[881.425 to 1341.516]	0	311.234
Sulfatide (d18:1:/24:0(OH))		pmol/mL	501	412.822	95.9117	404.628	[352.906 to 458.977]	0	175.867	550	396.1	94.9164	381.755	[333.79 to 447.81]	0	166.772
Sulfatide (d18:1:/24:0)		pmol/mL	501	189.208	58.4355	182.384	[148.41 to 220.459]	0	48.683	550	185.727	53.7738	182.627	[150.057 to 216.611]	0	35.5834
Sulfatide (d18:1:/24:1(OH))		pmol/mL	501	253.487	95.2414	240.846	[182.907 to 308.265]	0	53.0269	550	227.786	87.323	216.744	[167.384 to 270.958]	0	54.9069
Sulfatide (d18:1:/24:1)		pmol/mL	501	309.703	101.256	294.88	[240.404 to 365.694]	0	68.1751	550	290.874	87.9601	280.561	[231.719 to 338.85]	0	42.2725
SM(34:3)		pmol/mL	501	72.7452	20.2414	71.9741	[59.849 to 82.631]	0	15.9213	550	71.4252	20.1455	70.5457	[57.758 to 81.979]	0	25.6252
SM(35:2) (b)		pmol/mL	501	133.669	49.8749	130.06	[99.553 to 164.374]	0	5.79021	550	129	40.8137	127.534	[102.867 to 149.946]	0	9.2465
SM(37:1)		pmol/mL	501	1194.35	366.444	1176.05	[968.745 to 1392.838]	0	224.052	550	1237.72	402.337	1196.26	[985.169 to 1452.029]	0	344.839
SM(37:2)		pmol/mL	501	201.499	91.3415	195.934	[125.701 to 266.218]	0	36.2253	550	273.627	93.8928	267.047	[212.026 to 333.871]	0	72.8255
SM(38:3) (a)		pmol/mL	501	385.123	118.166	362.388	[310.735 to 436.968]	0	45.2932	550	310.806	78.5257	306.558	[257.11 to 347.101]	0	95.4058
SM(38:3) (b)		pmol/mL	501	91.9934	42.2897	91.0752	[53.959 to 125.38]	0	22.0274	550	129.519	41.9894	130.146	[99.81 to 155.76]	0	31.8674
SM(40:3) (a)		pmol/mL	501	996.977	278.95	967.06	[825.359 to 1137.778]	0	89.6103	550	819.2	225.521	792.533	[669.014 to 949.918]	0	158.492
SM(40:3) (b)		pmol/mL	501	1069.05	501.343	1047.23	[621.427 to 1430.127]	0	170.23	550	1377.92	462.554	1344.81	[1061.454 to 1663.251]	0	345.538
SM(41:0)		pmol/mL	501	885.604	314.657	831.801	[675.018 to 1007.505]	0	180.452	550	975.03	334.418	916.267	[738.762 to 1134.623]	0	348.728
SM(41:1) (a)		pmol/mL	501	1070.98	465.807	1052.29	[715.064 to 1342.079]	0	194.049	550	1793.91	682.035	1720.16	[1313.942 to 2202.26]	0	353.335
SM(43:1)		pmol/mL	501	1531.88	561.983	1504.98	[1098.182 to 1895.558]	0	422.058	550	2405.69	730.807	2312.91	[1901.57 to 2868.087]	0	704.324
SM(43:2) (b)		pmol/mL	501	874.196	384.452	876.824	[541.162 to 1128.026]	0	186.026	550	1473.53	501.962	1410.31	[1121.943 to 1781.947]	0	319.697
SM(43:2) (c)		pmol/mL	501	470.222	155.473	456.414	[378.207 to 539.599]	0	114.359	550	732.643	219.151	712.479	[591.987 to 852.749]	0	232.291
SM(44:1)		pmol/mL	501	252.345	71.5434	244.337	[207.496 to 292.334]	0	53.6101	550	328.279	89.7488	323.289	[265.658 to 379.752]	0	122.734
SM(44:2)		pmol/mL	501	595.352	199.167	584.916	[465.137 to 707.132]	0	112.987	550	622.078	155.308	605.746	[519.269 to 710.788]	0	200.861
SM(44:3)		pmol/mL	501	377.177	95.0125	369.164	[317.788 to 421.887]	0	64.8199	550	346.446	87.447	341.649	[285.946 to 393.588]	0	101.569
SM(d16:1/19:0)		pmol/mL	501	1006.03	532.997	1031.86	[493.348 to 1382.976]	0	127.157	550	1504.09	551.036	1484.7	[1140.468 to 1834.435]	0	179.183
SM(d16:1/23:0)/SM(d17:1/22:0)		pmol/mL	501	5048.53	2470.37	4481.94	[3396.2 to 6023.072]	0	686.961	550	5138.5	2007.93	4898.01	[3641.128 to 6193.983]	0	1343.04
SM(d16:1/24:1)		pmol/mL	501	7097.28	2581.62	6706.1	[5347.265 to 8340.911]	0	628.701	550	5681.52	1990.88	5353.01	[4390.955 to 6661.387]	0	730.63
SM(d17:1/14:0)		pmol/mL	501	292.252	94.3922	286.962	[225.235 to 350.273]	0	60.8012	550	335.868	124.623	322.406	[250.801 to 410.878]	0	65.3108
SM(d17:1/16:0)		pmol/mL	501	7382.45	2192.9	7210.87	[5953.68 to 8577.708]	0	1632	550	8142.03	2591.08	7954.99	[6316.845 to 9762.989]	0	2515.02
SM(d17:1/24:1)		pmol/mL	501	4086.22	1291.76	3988.22	[3192.184 to 4835.473]	0	913.975	550	4951.27	1406.44	4853.04	[4023.07 to 5829.252]	0	1564.92
SM(d18:0/14:0)		pmol/mL	501	354.966	111.891	340.063	[279.993 to 420.326]	0	55.648	550	337.379	119.004	318.405	[263.12 to 398.227]	0	110.631
SM(d18:0/16:0)		pmol/mL	501	8765.47	2463.64	8382.43	[7208.382 to 10154.31]	0	1831.01	550	8468.96	2064.33	8196.88	[7136.246 to 9575.366]	0	3148.17
SM(d18:0/22:0)		pmol/mL	501	1826.72	708.678	1697.07	[1330.13 to 2159.54]	0	429.285	550	1440.21	492.055	1375.3	[1092.164 to 1667.978]	0	400.535
SM(d18:1/14:0/SM(d16:1/16:0)		pmol/mL	501	16290.2	5096.19	15737.2	[13042.963 to 19121]	0	2746.64	550	14021.3	4455.11	13484.6	[10974.724 to 16275.546]	0	4460.88
SM(d18:1/16:0)		pmol/mL	501	119516	26416.6	119988	[102785.41 to 133830]	0	20921.4	550	114776	22794.8	112832	[101953.56 to 127373.488]	0	26700.9
SM(d18:1/17:0)/SM(d17:1/18:0)		pmol/mL	501	2473.25	994.33	2444.84	[1620.81 to 3148.724]	0	654.938	550	2842.44	812.194	2816.03	[2323.606 to 3354.734]	0	931.06
SM(d18:1/18:0/SM(d16:1/20:0)		pmol/mL	501	18772	7503.27	17812.2	[13751.211 to 22267.473]	0	2147.19	550	15936.6	5379.4	15417.9	[12613.614 to 18164.005]	0	4090.67
SM(d18:1/20:0)/SM(d16:1/22:0)		pmol/mL	501	14592.9	6166.59	13596.4	[10636.688 to 17021.08]	0	1436.41	550	10237.6	3188.14	9880.29	[8127.562 to 11911.864]	0	2661.41
SM(d18:1/22:0)/SM(d16:1/24:0)		pmol/mL	501	41240	10054.3	40736	[34782.781 to 46615.137]	0	7894.92	550	37283.2	8378.19	36574.7	[32083.287 to 42281.391]	0	11720.3
SM(d18:1/23:0)/SM(d17:1/24:0)		pmol/mL	501	15461.6	3920.99	15103.8	[12920.923 to 17662.133]	0	2609.56	550	19468.6	5206.12	19164.3	[16005.252 to 22524.737]	0	7119.14
SM(d18:1/24:0)		pmol/mL	501	28789.5	7029.19	28164.6	[24034.664 to 32961.484]	0	5330.84	550	28609.9	6799.97	28370.3	[24158.197 to 32476.926]	0	9010.14
SM(d18:1/24:1)		pmol/mL	501	49550.3	15963.9	48839.6	[38037.281 to 59256.148]	0	7934.95	550	44892.1	13041.3	43205.1	[35780.905 to 51980.28]	0	9333.21
SM(d18:2/14:0)		pmol/mL	501	907.63	260.077	899.394	[723.03 to 1077.267]	0	204.537	550	816.077	229.545	817.287	[666.704 to 953.4]	0	177.268
SM(d18:2/16:0)		pmol/mL	501	8939.26	2738.03	8806.04	[7032.039 to 10490.551]	0	1619.07	550	7953.69	2145.61	7787.49	[6428.743 to 9332.94]	0	2456.47
SM(d18:2/17:0)		pmol/mL	501	229.28	104.038	224.157	[139.191 to 302.197]	0	45.7839	550	288.981	103.498	281.758	[220.62 to 348.675]	0	63.4533
SM(d18:2/18:0)		pmol/mL	501	9785.65	4150.44	9488.68	[6466.955 to 12418.25]	0	1406.28	550	8963.52	2633.96	8817.57	[7299.164 to 10367.273]	0	2702.15
SM(d18:2/18:1)		pmol/mL	501	385.182	142.236	368.075	[281.364 to 476.425]	0	83.0657	550	406.596	122.19	391.565	[325.672 to 475.818]	0	106.954
SM(d18:2/20:0)		pmol/mL	501	4152.92	1328.49	4075.16	[3246.256 to 5025.716]	0	473.698	550	3735.97	933.709	3731.96	[3123.091 to 4256.701]	0	1015.2
SM(d18:2/22:0)		pmol/mL	501	10510.7	3080.64	10242.1	[8688.361 to 12174.745]	0	1406.87	550	9607.82	2631.5	9417.8	[7726.337 to 11022.304]	0	2552
SM(d18:2/23:0)		pmol/mL	501	5448.71	1484.39	5385.91	[4531.259 to 6378.5]	0	1022.89	550	7435.8	2339.4	7281.04	[5928.766 to 8655.716]	0	2229.41
SM(d18:2/24:0)		pmol/mL	501	12385.4	2951.85	12412.7	[10455.117 to 14217.909]	0	2034.18	550	12335.5	2823.38	12220.9	[10451.218 to 14078.048]	0	4020.29
SM(d19:1/24:1)		pmol/mL	501	1800.59	1140.28	1901.49	[655.211 to 2655.715]	0	130.31	550	2653.17	922.575	2628.73	[2105.842 to 3207.493]	0	227.032
PA(34:1)		pmol/mL	501	22.3182	12.4559	17.7994	[13.797 to 27.645]	0	7.21928	550	23.1883	15.0148	17.7608	[13.703 to 29.738]	0	5.26851
PA(36:1)		pmol/mL	501	9.25701	4.97022	7.71969	[5.926 to 11.425]	0	3.09745	550	8.8641	5.03971	7.38646	[5.786 to 10.754]	0	1.96533
PA(36:2)		pmol/mL	501	17.6751	11.3931	13.5246	[10.094 to 22.445]	0	4.52819	550	16.6469	11.2761	12.5416	[9.327 to 20.31]	0	4.21714
PA(36:3)		pmol/mL	501	22.8639	13.8905	17.6835	[13.044 to 29.108]	0	6.01108	550	24.7272	21.1701	17.9394	[13.438 to 31.871]	0	5.78144
PA(36:4)		pmol/mL	501	11.989	5.0231	10.6365	[8.53 to 14.519]	0	2.76689	550	12.3624	5.73253	10.6807	[8.57 to 14.685]	0	4.47767
PA(40:6)		pmol/mL	501	4.82975	1.81121	4.56524	[3.655 to 5.718]	0	1.0298	550	4.57506	1.82775	4.33604	[3.319 to 5.459]	0	1.18814
PC(14:0_16:0)		pmol/mL	501	1921.06	680.446	1872.7	[1454.751 to 2303.184]	0	289.389	550	2073.06	834.538	2014.93	[1524.631 to 2482.379]	0	372.247
PC(14:0_20:4)		pmol/mL	501	346.119	151.299	322.016	[240.132 to 425.45]	0	46.9124	550	459.197	194.468	417.171	[326.362 to 560.208]	0	70.4645
PC(14:0_22:6)		pmol/mL	501	203.569	100.396	183.656	[136.131 to 239.34]	0	25.3283	550	223.243	103.916	203.268	[154.963 to 272.962]	0	30.0526
PC(15-MHDA_18:1)		pmol/mL	501	346.074	196.593	358.431	[153.425 to 494.293]	0	30.2402	550	722.605	342.772	695.906	[474.694 to 915.952]	0	61.2144
PC(15-MHDA_18:2)		pmol/mL	501	741.222	418.516	752.655	[368.892 to 1017.21]	0	51.6669	550	1612.27	677.511	1590.56	[1116.95 to 2060.449]	0	147.791
PC(15-MHDA_20:4)		pmol/mL	501	538.815	270.021	543.794	[300.961 to 722.633]	0	64.2302	550	887.377	306.993	892.28	[682.546 to 1077.801]	0	117.668
PC(15-MHDA_22:6)		pmol/mL	501	219.999	140.341	214.808	[91.182 to 308.829]	0	8.52346	550	314.753	132.969	311.319	[227.51 to 384.828]	0	8.85143
PC(15:0_20:3)		pmol/mL	501	299.135	102.971	293.423	[229.12 to 366.292]	0	84.0518	550	634.397	243.664	618.197	[460.321 to 793.619]	0	106.593
PC(15:0_20:4)		pmol/mL	501	304.363	126.885	305.159	[201.531 to 392.099]	0	46.3105	550	506.301	179.584	498.915	[385.934 to 615.83]	0	61.3137
PC(15:0_22:6)		pmol/mL	501	213.546	102.502	199.921	[139.496 to 276.375]	0	20.6513	550	299.538	122.334	287.331	[219.17 to 367.4]	0	23.1634
PC(16:0_16:0)		pmol/mL	501	7877.11	2211.06	7728.75	[6455.747 to 9054.03]	0	121.668	550	7064.68	1663.89	7069.92	[6050.72 to 8016.398]	0	2124
PC(16:0_18:0)		pmol/mL	501	1759.14	666.73	1665.3	[1260.016 to 2137.884]	0	354.452	550	1422.39	391.713	1401.68	[1162.44 to 1640.381]	0	392.265
PC(16:0_18:1)		pmol/mL	501	71147.8	12640.8	72144.1	[64244.871 to 78842.859]	0	12630.3	550	73331.8	13818.2	74536.1	[65226.233 to 81657.076]	0	25200.1
PC(16:0_18:2)		pmol/mL	501	113314	12833.3	113862	[105880.64 to 121149.07]	0	36463	550	115287	12901.8	115793	[107856.883 to 122945.013]	0	55860.2
PC(16:0_18:3) (a)		pmol/mL	501	2253.48	724.382	2187.26	[1757.886 to 2718.679]	0	389.944	550	3697.32	1472.43	3503.03	[2682.271 to 4495.592]	0	647.116
PC(16:0_18:3) (b)		pmol/mL	501	1266.66	539.363	1170.24	[919.378 to 1471.328]	0	214.661	550	1892.45	861.293	1759.97	[1292.188 to 2323.19]	0	390.371
PC(16:0_20:3) (a)		pmol/mL	501	25096	7737.56	24289.4	[19971.443 to 30117.691]	0	3632.41	550	31274	8961.72	31306.1	[25695.85 to 36672.379]	0	7631.9
PC(16:0_20:3) (b)		pmol/mL	501	1825.25	1666.94	1727.27	[1319.946 to 2131.795]	0	423.265	550	2746.99	1328.17	2450.76	[1857.899 to 3348.34]	0	663.983
PC(16:0_20:4)		pmol/mL	501	67386.5	11335.2	68988.7	[60653.773 to 74217.711]	0	18484.1	550	64808.6	9398.52	65613.7	[59637.777 to 70827.762]	0	25416.5
PC(16:0_20:5)		pmol/mL	501	4349.88	2420.74	3920.87	[2719.586 to 5458.159]	0	699.894	550	7000.79	3273.53	6398.13	[4706.089 to 9282.275]	0	1009.1
PC(16:0_22:6)		pmol/mL	501	43587.4	13052.4	43979.1	[35919.996 to 52056.109]	0	8077.96	550	33544.9	10468.7	33131.5	[26614.929 to 39596.762]	0	8016.03
PC(16:1_18:2)		pmol/mL	501	585.191	226.565	551.479	[425.035 to 693.613]	0	83.5998	550	794.246	298.819	762.534	[573.827 to 951.894]	0	135.921
PC(16:1_20:4)		pmol/mL	501	368.559	123.655	353.179	[278.763 to 439.784]	0	64.6157	550	501.958	176.497	485.882	[386.086 to 614.617]	0	89.1871
PC(16:1_22:6)		pmol/mL	501	236.02	87.9313	230.577	[171.86 to 291.592]	0	40.3983	550	278.717	105.905	270.72	[209.099 to 338.611]	0	40.2655
PC(17:0_18:1)		pmol/mL	501	716.833	323.976	699.325	[464.195 to 910.885]	0	92.5505	550	1085.43	447.499	1032.13	[774.472 to 1346.978]	0	174.249
PC(17:0_18:2)		pmol/mL	501	2164.28	768.709	2102.55	[1666.058 to 2607.287]	0	258.111	550	2756.15	901.046	2681.68	[2171.866 to 3310.411]	0	447.725
PC(17:0_20:4)		pmol/mL	501	1003.73	407.887	1009.31	[669.065 to 1286.557]	0	173.683	550	1159.38	318.346	1159.23	[964.76 to 1358.526]	0	199.038
PC(17:0_22:6)		pmol/mL	501	393.199	187.727	380.169	[260.542 to 503.479]	0	40.4186	550	402.907	153.914	386.435	[304.881 to 478.549]	0	36.1118
PC(17:1_18:2)		pmol/mL	501	177.042	63.8053	170.42	[131.405 to 216.841]	0	36.9317	550	285.504	99.9549	279.289	[215.883 to 352.048]	0	40.3785
PC(18:0_18:1)		pmol/mL	501	21637.8	6048.01	20973.5	[17847.537 to 24539.008]	0	4415.72	550	21842	7284.8	20808.5	[17117.367 to 25550.53]	0	6748.94
PC(18:0_18:2)		pmol/mL	501	91637.6	12548.1	92208.6	[85187.57 to 98987.945]	0	17288.7	550	84184.2	13378.4	85663.8	[76781.814 to 92376.363]	0	23192.5
PC(18:0_20:3)		pmol/mL	501	12235.3	4149.38	11767	[9373.809 to 14616.05]	0	2666.09	550	11926.6	3218.41	11794.6	[10095.535 to 13852.668]	0	3370.35
PC(18:0_20:4)		pmol/mL	501	36166.3	10298	34828	[29168.637 to 42112.125]	0	7931.17	550	28661.9	7256.9	28348.9	[23906.896 to 32154.853]	0	8653.92
PC(18:0_22:4)		pmol/mL	501	1197.2	342.362	1171.2	[968.706 to 1371.28]	0	241.426	550	1230.02	303.313	1198.12	[1038.448 to 1390.73]	0	371.233
PC(18:0_22:5) (n3)		pmol/mL	501	1687.11	656.561	1647.5	[1184.229 to 2092.875]	0	428.855	550	1771.35	460.645	1745.1	[1489.553 to 2039.546]	0	571.326
PC(18:0_22:5) (n6)		pmol/mL	501	806.217	285.555	766.163	[609.261 to 963.577]	0	181.294	550	832.828	282.603	792.035	[640.368 to 975.124]	0	179.253
PC(18:0_22:6)		pmol/mL	501	11029.5	4167.24	10708.4	[8433.118 to 13441.664]	0	1768.83	550	7442.58	2845.74	6996.07	[5561.888 to 8706.394]	0	1715.38
PC(18:1_18:1)		pmol/mL	501	9484.86	3010.72	9003.34	[7489.334 to 11061.381]	0	1324.96	550	8214.76	2542.25	7825.5	[6583.336 to 9435.491]	0	1755.22
PC(18:1_18:2)		pmol/mL	501	20619.6	7275.7	19805.8	[15664.133 to 24433.305]	0	439.826	550	18121.4	6154.52	17540.8	[14029.135 to 21408.656]	0	3513.31
PC(18:1_20:3)		pmol/mL	501	1902.16	604.896	1833.77	[1471.456 to 2266.504]	0	301.264	550	2119.79	629.966	2103.65	[1698.121 to 2469.219]	0	582.475
PC(18:1_22:6) (a)		pmol/mL	501	1936.17	655.858	1851.57	[1516.168 to 2250.253]	0	354.062	550	1737.79	575.946	1695.81	[1363.727 to 2043.894]	0	506.953
PC(18:1_22:6) (b)		pmol/mL	501	270.908	132.013	267.519	[161.296 to 353.054]	0	34.6049	550	315.462	128.836	305.776	[234.638 to 368.259]	0	28.4866
PC(18:2_18:2)		pmol/mL	501	6762.9	2535.15	6389.29	[4971.55 to 8313.202]	0	557.564	550	8507.19	3323.18	8218.26	[6221.271 to 10376.558]	0	1372.06
PC(18:2_20:5)		pmol/mL	501	79.6903	36.576	74.1934	[55.638 to 92.876]	0	10.5691	550	130.715	62.5585	123.8	[85.487 to 163.799]	0	16.2034
PC(20:0_20:4)		pmol/mL	501	198.829	53.1041	193.267	[165.027 to 225.136]	0	36.3746	550	150.27	44.4128	147.5	[125.081 to 170.866]	0	48.5572
PC(28:0)		pmol/mL	501	455.911	197.171	431.217	[328.791 to 546.717]	0	67.1981	550	432.077	226.193	396.746	[288.909 to 523.123]	0	62.981
PC(31:0) (a)		pmol/mL	501	135.561	88.7974	131.298	[50.538 to 199.357]	0	7.97089	550	469.697	314.084	407.999	[221.585 to 644.937]	0	15.3341
PC(31:0) (b)		pmol/mL	501	188.226	94.833	187.291	[99.285 to 259.567]	0	30.0959	550	309.562	129.776	299.725	[223.601 to 388.508]	0	39.7729
PC(32:1)		pmol/mL	501	5262.02	1857.49	5220.78	[3957.066 to 6363.172]	0	20.4303	550	6921.44	3009.3	6412.86	[4857.211 to 8513.945]	0	1254.83
PC(32:2)		pmol/mL	501	908.253	469.174	824.911	[576.011 to 1086.77]	0	96.2115	550	1043.5	428.904	973.46	[766.964 to 1275.785]	0	138.342
PC(33:0) (a)		pmol/mL	501	187.702	123.322	188.291	[62.336 to 278.469]	0	12.0481	550	364.696	178.861	350.976	[234.28 to 472.705]	0	22.6044
PC(33:0) (b)		pmol/mL	501	107.377	50.3428	109.457	[61.229 to 142.825]	0	21.1454	550	136.502	46.0586	135.643	[105.532 to 163.361]	0	30.345
PC(33:1)		pmol/mL	501	729.691	360.114	699.83	[429.07 to 982.249]	0	90.8239	550	1487.99	771.059	1401.9	[934.6 to 1884.659]	0	163.428
PC(33:2)		pmol/mL	501	1077.1	358.564	1037.38	[803.757 to 1301.729]	0	222.576	550	2041.92	725.041	1982.21	[1534.379 to 2509.535]	0	489.441
PC(34:5)		pmol/mL	501	13.7951	7.56868	12.3114	[8.438 to 17.176]	0	2.24519	550	28.7829	19.4251	23.479	[15.147 to 37.657]	0	2.35337
PC(35:5)		pmol/mL	501	9.20926	6.23605	8.11252	[4.622 to 12.24]	0	0.787982	550	28.0861	19.1673	23.536	[13.737 to 36.999]	0	1.29743
PC(36:6) (a)		pmol/mL	501	27.0905	13.6028	24.1987	[17.499 to 33.096]	0	4.70854	550	58.2749	33.867	50.8237	[33.534 to 76.204]	0	5.51918
PC(38:2)		pmol/mL	501	1943.74	428.353	1893.2	[1682.426 to 2203.42]	0	443.445	550	1726.38	382.806	1716.44	[1483.257 to 1945.929]	0	459.154
PC(38:4) (b)		pmol/mL	501	2128.12	632.089	2070.08	[1659.592 to 2520.613]	0	465.876	550	2800.99	823.385	2763.23	[2237.155 to 3239.391]	0	826.101
PC(38:5) (a)		pmol/mL	501	9541.34	2782.82	9399.38	[7720.343 to 11197.008]	0	2342.29	550	9855.54	2211.63	9858.76	[8378.529 to 11315.475]	0	3058.91
PC(38:5) (b)		pmol/mL	501	5269.68	1913.84	5156.58	[3927.907 to 6631.571]	0	1206.65	550	6508.98	1986.49	6453.51	[5121.649 to 7801.451]	0	1266.28
PC(38:6) (a)		pmol/mL	501	1732.73	500.374	1729.01	[1389.188 to 2024.128]	0	294.839	550	2192.99	694.35	2166.3	[1739.179 to 2584.808]	0	431.219
PC(38:7)(c)		pmol/mL	501	130.107	48.2297	127.928	[95.209 to 162.676]	0	21.883	550	124.338	40.2452	122.567	[97.078 to 145.909]	0	30.3267
PC(39:5)(a)		pmol/mL	501	44.3539	23.481	43.4316	[26.259 to 58.77]	0	4.30175	550	57.6573	21.3185	55.268	[43.36 to 70.499]	0	3.73537
PC(39:5)(b)		pmol/mL	501	116.477	59.6631	115.427	[66.64 to 155.494]	0	19.3104	550	159.253	52.4635	161.249	[123.862 to 190.312]	0	26.8199
PC(40:10)		pmol/mL	501	2.47641	3.861	1.27574	[0.589 to 2.571]	0	0.115931	550	3.02459	4.02767	1.9752	[0.94 to 3.455]	0	0.122955
PC(40:7) (a)		pmol/mL	501	89.8286	33.3177	85.7787	[65.568 to 111.081]	0	17.5471	550	99.2605	35.2189	96.4103	[75.399 to 118.947]	0	19.0653
PC(40:8)		pmol/mL	501	272.323	89.5721	267.129	[208.342 to 331.783]	0	47.3331	550	262.059	90.6876	255.369	[199.162 to 316.299]	0	50.388
PC(44:12)		pmol/mL	501	4.1559	2.45098	3.70382	[2.471 to 5.347]	0	0.352233	550	2.51888	1.76132	2.05337	[1.388 to 3.121]	0	0.302021
PC(O-16:0/16:0)		pmol/mL	501	869.654	261.337	857.002	[700.769 to 1000.129]	0	138.904	550	873.118	231.614	857.982	[735.423 to 995.835]	0	253.798
PC(O-16:0/20:3)		pmol/mL	501	1224.75	405.372	1192.57	[942.321 to 1499.683]	0	381.531	550	1585.28	416.553	1560.85	[1290.903 to 1837.393]	0	654.074
PC(O-16:0/20:4)		pmol/mL	501	4148.46	1320.18	4093.91	[3252.362 to 4970.793]	0	517.832	550	4306.06	1153.2	4251.71	[3602.559 to 4937.937]	0	1160.09
PC(O-16:0/22:6)		pmol/mL	501	2055.03	691.303	2040.98	[1594.766 to 2471.156]	0	338.472	550	1886.25	631.01	1824.98	[1449.355 to 2238.477]	0	633.32
PC(O-18:0/18:1)		pmol/mL	501	149.884	49.0286	143.231	[118.392 to 174.369]	0	35.7746	550	161.161	45.3514	157.531	[130.316 to 185.787]	0	47.6856
PC(O-18:0/18:2)		pmol/mL	501	320.443	125.641	301.397	[234.933 to 392.992]	0	29.5948	550	408.926	147.521	389.272	[305.933 to 495.849]	0	54.6093
PC(O-18:0/20:4)		pmol/mL	501	2849.28	1135.3	2729.88	[2011.195 to 3521.435]	0	686.626	550	2993.87	879.512	2931.31	[2420.486 to 3458.859]	0	890.507
PC(O-18:0/22:6)		pmol/mL	501	1043.16	406.202	1008.12	[749.337 to 1313.593]	0	227.775	550	972.955	322.989	920.542	[751.296 to 1153.052]	0	272.554
PC(O-18:1/18:1)		pmol/mL	501	398.336	166.282	365.664	[279.724 to 487.215]	0	29.4873	550	322.557	122.848	306.5	[239.503 to 383.766]	0	49.1853
PC(O-18:1/18:2)		pmol/mL	501	1622.14	482.921	1545.42	[1289.72 to 1867.803]	0	286.821	550	1495.8	454.235	1432.83	[1185.788 to 1738.185]	0	356.701
PC(O-32:1)		pmol/mL	501	25.0098	11.0708	24.5167	[16.859 to 30.904]	0	4.98277	550	30.5361	10.6792	29.1801	[22.865 to 36.36]	0	8.69966
PC(O-32:2)		pmol/mL	501	38.3951	13.9697	36.7492	[27.664 to 46.905]	0	6.64931	550	46.9051	16.1757	45.7611	[36.312 to 56.501]	0	9.66111
PC(O-34:1)		pmol/mL	501	3003.16	762.822	2955.8	[2522.697 to 3418.489]	0	376.283	550	2640.41	627.021	2623.68	[2238.815 to 2975.638]	0	688.936
PC(O-34:2)		pmol/mL	501	1849.33	589.08	1773.59	[1458.277 to 2139.331]	0	393.611	550	2308.79	731.197	2215.73	[1820.29 to 2651.697]	0	473.376
PC(O-34:4)		pmol/mL	501	63.2651	20.5393	60.3648	[49.319 to 75.039]	0	13.2128	550	74.5415	23.9436	72.3251	[59.743 to 86.367]	0	17.1041
PC(O-35:4)		pmol/mL	501	38.4833	17.4499	37.1461	[23.679 to 49.68]	0	7.13575	550	67.8533	24.6909	65.471	[52.432 to 81.188]	0	13.465
PC(O-36:0)		pmol/mL	501	34.9193	9.33676	34.1883	[28.318 to 39.834]	0	11.0114	550	35.1588	10.4995	33.9105	[28.944 to 39.962]	0	10.3511
PC(O-36:5)		pmol/mL	501	248.787	120.263	229.895	[162.455 to 315.969]	0	45.7737	550	364.696	137.288	347.042	[271.498 to 440.983]	0	85.8828
PC(O-38:5)		pmol/mL	501	4540.64	1022.96	4498.96	[3893.149 to 5141.893]	0	759.256	550	3953.15	966.069	3875.15	[3278.212 to 4475.498]	0	1087.63
PC(O-40:5)		pmol/mL	501	657.206	212.688	635.449	[506.519 to 780.076]	0	169.44	550	695.191	180.297	671.558	[577.016 to 803.065]	0	213.759
PC(O-40:7) (a)		pmol/mL	501	954.076	310.534	934.036	[754.651 to 1126.857]	0	168.379	550	688.968	273.145	645.286	[503.912 to 823.532]	0	186.598
PC(O-40:7) (b)		pmol/mL	501	737.011	185.595	735.088	[608.646 to 868.208]	0	242.612	550	733.659	170.03	741.063	[611.546 to 841.243]	0	308.1
PC(P-15:0/20:4) (a)		pmol/mL	501	10.6694	12.7263	5.72681	[2.782 to 15.293]	0	0.485375	550	20.7062	11.9304	18.6594	[12.945 to 26.165]	0	1.33983
PC(P-15:0/20:4) (b)		pmol/mL	501	18.6226	7.48021	17.817	[14.394 to 21.305]	0	3.76627	550	27.2834	10.9211	25.3644	[20.7 to 31.638]	0	5.66777
PC(P-16:0/14:0)		pmol/mL	501	63.5433	23.8697	61.3573	[48.48 to 76.776]	0	9.72506	550	60.7928	22.446	60.2509	[44.879 to 73.491]	0	9.73656
PC(P-16:0/16:0)		pmol/mL	501	1103.57	341.965	1083.93	[873.121 to 1323.916]	0	176.013	550	992.064	295.461	1001.83	[763.718 to 1176.666]	0	339.096
PC(P-16:0/16:1)		pmol/mL	501	141.754	57.7864	133.975	[96.394 to 176.728]	0	20.3533	550	142.913	51.4297	140.752	[103.071 to 175.182]	0	37.0994
PC(P-16:0/18:0)		pmol/mL	501	27.1523	16.5237	23.9998	[15.881 to 33.841]	0	2.89696	550	24.57	11.0961	22.9312	[17.16 to 29.387]	0	3.28266
PC(P-16:0/18:1)		pmol/mL	501	783.682	249.127	767.869	[607.052 to 937.875]	0	127.397	550	748.131	229.386	737.636	[590.649 to 899.137]	0	233.806
PC(P-16:0/18:2)		pmol/mL	501	1683.44	572.815	1650.39	[1287.364 to 1997.553]	0	234.514	550	1945.74	680.142	1873.43	[1489.854 to 2274.691]	0	352.893
PC(P-16:0/18:3)		pmol/mL	501	115.502	39.3875	110.682	[90.46 to 134.412]	0	19.9148	550	179.23	69.0352	166.34	[135.375 to 207.66]	0	44.2444
PC(P-16:0/20:4)		pmol/mL	501	2882.11	1116.83	2823.84	[2085.26 to 3461.306]	0	317.287	550	2606.83	900.906	2537.92	[1983.083 to 3098.214]	0	623.692
PC(P-16:0/20:5)		pmol/mL	501	254.83	145.725	236.347	[156.856 to 317.757]	0	30.5279	550	334.813	149.953	307.635	[236.547 to 400.351]	0	58.187
PC(P-16:0/22:6)		pmol/mL	501	723.376	279.218	709.332	[536.48 to 888.986]	0	123.121	550	590.463	231.897	560.667	[432.66 to 704.039]	0	155.063
PC(P-17:0/20:4) (a)		pmol/mL	501	336.021	197.996	346.947	[148.789 to 492.324]	0	25.9037	550	419.469	158.985	403.46	[309.58 to 521.009]	0	52.8222
PC(P-17:0/20:4) (b)		pmol/mL	501	142.091	65.7891	138.195	[88.601 to 190.578]	0	22.5824	550	165.394	58.8711	157.275	[126.515 to 197.437]	0	35.9118
PC(P-18:0/18:2)		pmol/mL	501	289.598	106.232	278.137	[218.628 to 344.384]	0	23.0973	550	338.187	129.806	314.726	[248.831 to 400.673]	0	68.1555
PC(P-18:0/20:4)		pmol/mL	501	590.863	281.349	537.814	[378.195 to 764.088]	0	93.03	550	520.94	201.378	483.417	[382.113 to 625.648]	0	122.898
PC(P-18:0/22:5)		pmol/mL	501	396.183	153.201	386.628	[279.885 to 504.229]	0	75.3186	550	364.09	105.971	345.395	[292.23 to 422.443]	0	113.899
PC(P-18:0/22:6)		pmol/mL	501	267.286	114.312	256.834	[188.834 to 341.46]	0	44.6886	550	231.879	92.2736	221.607	[167.739 to 275.048]	0	56.2907
PC(P-18:1/18:1)		pmol/mL	501	260.65	88.2363	252.254	[196.902 to 313.129]	0	43.0879	550	280.719	84.9425	274.654	[217.915 to 333.946]	0	84.9274
PC(P-18:1/22:6)		pmol/mL	501	246.595	86.0851	242.669	[191.624 to 303.135]	0	44.3544	550	197.266	67.1316	188.811	[152.819 to 231.314]	0	43.2109
PC(P-20:0/20:4)		pmol/mL	501	81.4914	26.9305	78.8475	[61.507 to 97.647]	0	18.0342	550	73.912	21.7933	70.1805	[59.271 to 86.688]	0	21.6053
PC(P-35:2)(a)		pmol/mL	501	92.9867	57.1672	87.7381	[53.459 to 120.261]	0	8.01848	550	166.248	101.48	144.595	[104.334 to 200.881]	0	19.7298
PC(P-35:2)(b)		pmol/mL	501	31.2006	15.2918	29.0478	[21.158 to 37.706]	0	1.87759	550	55.1272	31.3919	48.0722	[36.226 to 65.655]	0	8.15605
PC(P-36:3)		pmol/mL	501	625.615	223.17	604.444	[454.88 to 771.433]	0	168.13	550	654.462	195.034	636.501	[523.746 to 755.501]	0	221.964
PC(P-38:5) (a)		pmol/mL	501	2893.74	974.101	2861.75	[2176.504 to 3578.799]	0	673.236	550	2463.8	724.777	2417.15	[1957.205 to 2876.085]	0	717.646
PC(P-38:5) (b)		pmol/mL	501	175.25	69.7857	173.755	[123.293 to 217.163]	0	28.7976	550	189.775	61.8254	186.162	[146.473 to 224.764]	0	55.2153
LPC(14:0) [sn1]		pmol/mL	501	529.257	221.58	495.249	[376.294 to 640.897]	0	84.2229	550	600.003	318.319	520.09	[388.656 to 719.536]	0	66.1898
LPC(14:0) [sn2]		pmol/mL	501	413.43	162.9	390.053	[305.312 to 493.027]	0	70.7415	550	473.763	228.525	422.367	[325.786 to 570.201]	0	59.2922
LPC(15-MHDA) [sn1] [104_sn1]		pmol/mL	501	197.064	128.595	177.386	[95.975 to 261.025]	0	18.7869	550	366.506	198.332	319.943	[232.972 to 460.101]	0	19.5626
LPC(15-MHDA) [sn1] / LPC(17:0) [sn2]		pmol/mL	501	661.41	358.044	601.315	[401.958 to 815.233]	0	102.157	550	1040.49	500.475	918.373	[705.623 to 1276.453]	0	142.847
LPC(15-MHDA) [sn2]		pmol/mL	501	131.274	85.2319	122.651	[63.005 to 176.45]	0	12.7751	550	248.3	128.881	221.273	[160.978 to 311.315]	0	12.0251
LPC(15:0) [sn1]		pmol/mL	501	553.255	262.639	513.71	[375.886 to 676.653]	0	103.323	550	986.137	517.453	856.405	[627.411 to 1220.502]	0	120.697
LPC(15:0) [sn2]		pmol/mL	501	221.848	108.164	206.966	[145.392 to 284.449]	0	36.613	550	435.983	226.895	387.575	[276.648 to 544.156]	0	45.1134
LPC(16:0) [sn1]		pmol/mL	501	53660.7	21816.1	47966.8	[38926.398 to 65651.367]	0	7532.79	550	53356.7	25591	46577.1	[35187.922 to 64984.258]	0	10117.9
LPC(16:0) [sn2]		pmol/mL	501	12710.1	6168.59	10928.2	[8622.538 to 15016.209]	0	2112.25	550	12788.3	7045.77	10733.5	[7904.282 to 15397.342]	0	3283.99
LPC(16:1) [sn1]		pmol/mL	501	1268.84	537.197	1192.15	[892.154 to 1559.54]	0	269.647	550	1575.32	750.666	1402.28	[1020.044 to 1950.523]	0	320.697
LPC(16:1) [sn2]		pmol/mL	501	150.607	57.6639	141.08	[111.913 to 184.57]	0	31.9706	550	181.431	79.8822	166.128	[122.016 to 226.033]	0	44.6198
LPC(17:0) [sn1]		pmol/mL	501	889	416.722	810.168	[624.215 to 1036.798]	0	162.202	550	1134.16	524.576	971.322	[791.59 to 1345.407]	0	231.404
LPC(17:1) (a) [sn1] [104_sn1]		pmol/mL	501	80.6999	43.8983	74.9881	[48.81 to 101.331]	0	11.9379	550	118.942	65.045	106.231	[74.123 to 149.726]	0	13.5608
LPC(17:1) [sn1] (a) / LPC(17:1) [sn2] (b)		pmol/mL	501	177.23	94.8644	161.822	[109.213 to 227.132]	0	24.2523	550	272.154	140.262	244.855	[171.774 to 342.119]	0	33.3608
LPC(17:1) [sn1] (b)		pmol/mL	501	31.7011	19.6154	30.4942	[14.27 to 45.554]	0	2.09028	550	69.8476	35.8033	64.1413	[42.95 to 94.257]	0	3.38041
LPC(17:1) [sn2] (a)		pmol/mL	501	60.0372	31.6299	54.3075	[36.219 to 78.438]	0	9.03599	550	87.0109	44.4735	78.1888	[54.042 to 108.381]	0	12.7791
LPC(18:0) [sn1]		pmol/mL	501	34717.1	13246.6	31548.4	[25266.254 to 41779.68]	0	8808.3	550	28844.2	12770.7	25378.4	[20034.691 to 34328.311]	0	5119.58
LPC(18:0) [sn2]		pmol/mL	501	13312.7	5465.18	11818.6	[9449.742 to 15669.388]	0	2876.04	550	10977.3	4911.57	9546.21	[7661.307 to 13221.433]	0	2104.78
LPC(18:1) [sn1]		pmol/mL	501	18445.4	6544.24	17422.5	[13896.522 to 22075.104]	0	3084.42	550	16154.7	6426.05	14888.4	[11417.201 to 19340.237]	0	4054.65
LPC(18:1) [sn2]		pmol/mL	501	5030.43	1859.26	4780.21	[3806.618 to 6055.57]	0	488.931	550	4256.55	1724.31	4077.92	[2999.831 to 5122.988]	0	725.35
LPC(18:2) [sn1]		pmol/mL	501	26280	9560.47	25168.4	[19357.936 to 32576.141]	0	2096.11	550	20023.4	8306.43	18545.9	[14109.42 to 25607.441]	0	3927.41
LPC(18:2) [sn2]		pmol/mL	501	7784.73	2780.25	7358.31	[5835.826 to 9459.189]	0	523.992	550	5969.69	2395.39	5581.77	[4261.745 to 7284.077]	0	1163.41
LPC(18:3) (a) [sn1] [104_sn1]		pmol/mL	501	166.558	72.6602	153.633	[114.34 to 209.435]	0	28.1861	550	200.527	95.5552	181.683	[132.84 to 239.591]	0	55.0033
LPC(18:3) [sn1] (a)/LPC(18:3) [sn2] (b)		pmol/mL	501	167.8	70.8022	160.107	[116.646 to 207.244]	0	21.7883	550	195.266	88.6344	183.413	[134.007 to 236.454]	0	51.9925
LPC(18:3) [sn1] (b)		pmol/mL	501	140.703	63.0032	131.64	[96.937 to 171.959]	0	11.6578	550	147.752	70.2519	134.766	[99.594 to 178.869]	0	24.2264
LPC(18:3) [sn2] (a)		pmol/mL	501	66.8812	28.1935	62.3089	[46.248 to 81.422]	0	10.7311	550	82.7591	37.6478	76.6606	[57.386 to 99.415]	0	22.6192
LPC(19:0) (a) [sn1] [104_sn1]		pmol/mL	501	11.1119	7.20535	9.54155	[5.935 to 14.229]	0	0.629942	550	13.5399	6.92953	12.2804	[8.891 to 16.464]	0	2.40992
LPC(19:0) [sn1] (a) / LPC(19:0) [sn2] (b)		pmol/mL	501	49.0806	21.7624	45.329	[34.223 to 59.539]	0	11.3264	550	54.6491	24.6437	49.6283	[38.332 to 63.689]	0	12.0058
LPC(19:0) [sn1] (b)		pmol/mL	501	86.4139	34.6806	79.5486	[63.374 to 102.471]	0	17.399	550	93.8461	42.2883	84.044	[65.098 to 111.966]	0	20.9296
LPC(19:0) [sn2] (a)		pmol/mL	501	7.26801	4.61615	6.37189	[3.79 to 9.338]	0	0.819759	550	9.01379	4.22508	8.14413	[6.112 to 10.84]	0	1.03061
LPC(19:1) (a)		pmol/mL	501	7.32714	4.3976	6.46504	[4.394 to 9.133]	0	0.400381	550	8.87137	4.84954	7.64468	[5.458 to 10.987]	0	0.758672
LPC(19:1) (b)		pmol/mL	501	39.7051	21.6211	36.4451	[24.135 to 48.96]	0	8.07977	550	48.1317	23.5625	41.754	[32.413 to 58.639]	0	7.01158
LPC(19:1) (c)		pmol/mL	501	4.05176	2.37298	3.75079	[2.211 to 5.318]	0	0.303495	550	6.62321	3.37968	6.0095	[4.285 to 8.096]	0	0.76075
LPC(20:0) [sn1]		pmol/mL	501	181.061	75.9885	162.113	[126.631 to 223.289]	0	36.5032	550	122.806	63.391	106.029	[80.185 to 148.703]	0	27.3839
LPC(20:0) [sn2]		pmol/mL	501	75.4286	33.0402	65.1047	[53.186 to 92.931]	0	12.8494	550	52.1047	27.2777	45.7599	[33.66 to 63.521]	0	6.22772
LPC(20:1) [sn1]		pmol/mL	501	274.999	135.851	223.214	[184.081 to 342.513]	0	63.4067	550	214.41	116.675	171.916	[136.385 to 266.057]	0	44.4532
LPC(20:1) [sn2]		pmol/mL	501	95.0409	47.0238	79.3234	[64.084 to 116.012]	0	17.9846	550	70.7105	38.5977	59.4291	[44.52 to 86.676]	0	11.3059
LPC(20:2) [sn1]		pmol/mL	501	188.541	78.9228	168.026	[135.126 to 226.655]	0	33.5699	550	147.798	67.7184	131.086	[99.857 to 179.212]	0	34.6406
LPC(20:2) [sn2]		pmol/mL	501	85.4983	34.7358	77.0608	[63.646 to 100.534]	0	14.7137	550	67.4638	28.4544	63.0704	[48.091 to 79.252]	0	13.9652
LPC(20:3) [sn1]		pmol/mL	501	1162.31	479.318	1087.84	[833.377 to 1420.391]	0	175	550	1069.52	406.95	1044.09	[801.604 to 1246.439]	0	186.554
LPC(20:3) [sn2]		pmol/mL	501	587.092	232.266	554.332	[423.854 to 703.51]	0	78.2171	550	545.384	190.346	535.667	[426.131 to 641.087]	0	106.665
LPC(20:4) [sn1]		pmol/mL	501	3636.42	1376.63	3486.51	[2742.889 to 4393.926]	0	469.31	550	2732.19	1022.08	2580.87	[1981.948 to 3283.735]	0	581.065
LPC(20:4) [sn2]		pmol/mL	501	1640.91	572.62	1565.15	[1260.66 to 1973.467]	0	240.493	550	1308.86	434.921	1247.55	[1008.413 to 1545.257]	0	259.717
LPC(20:5) [sn1]		pmol/mL	501	240.681	151.787	212.072	[137.974 to 300.231]	0	25.0602	550	307.122	155.704	278.874	[186.589 to 396.782]	0	38.2332
LPC(20:5) [sn2]		pmol/mL	501	99.2014	61.12	88.5733	[59.072 to 125.272]	0	13.1661	550	130.043	63.7096	119.197	[80.397 to 168.6]	0	16.7714
LPC(22:0) [sn1]		pmol/mL	501	26.8765	10.3938	24.4856	[20.132 to 30.818]	0	6.0501	550	18.6166	6.35503	17.8808	[14.174 to 22.006]	0	4.36301
LPC(22:0) [sn2]		pmol/mL	501	12.6678	5.1382	11.6972	[9.293 to 14.636]	0	2.32902	550	8.82061	3.18386	8.47923	[6.765 to 10.483]	0	1.42988
LPC(22:1) [sn1]		pmol/mL	501	22.2319	8.0201	21.3964	[16.879 to 26.069]	0	4.5682	550	16.2355	6.93154	14.5399	[11.197 to 19.95]	0	4.20814
LPC(22:1) [sn2]		pmol/mL	501	8.48009	3.198	7.98474	[6.395 to 10.121]	0	1.19244	550	5.80867	2.74229	5.1453	[3.886 to 7.147]	0	0.990697
LPC(22:4) [sn1]		pmol/mL	501	58.5346	24.103	54.8376	[40.706 to 70.532]	0	8.00702	550	52.5157	22.8289	48.6164	[36.363 to 63.922]	0	9.25141
LPC(22:4) [sn2]		pmol/mL	501	39.1293	14.3357	36.8402	[29.018 to 47.165]	0	6.75058	550	37.8452	13.2808	36.091	[29.517 to 43.86]	0	6.58491
LPC(22:5) (n3) [sn1] [104_sn1]		pmol/mL	501	185.571	97.229	167.987	[116.482 to 237.679]	0	29.2142	550	167.463	67.9425	156.375	[120.771 to 199.519]	0	32.7394
LPC(22:5) [sn1] (n3)/LPC(22:5) [sn2] (n6)		pmol/mL	501	212.552	108.597	194.162	[138.324 to 269.821]	0	38.8567	550	194.644	77.8096	183.025	[141.616 to 227.217]	0	32.7839
LPC(22:5) [sn1] (n6)		pmol/mL	501	65.9851	31.4152	59.1491	[44.714 to 81.138]	0	9.09035	550	61.5509	29.1806	54.5743	[42.72 to 72.849]	0	8.66724
LPC(22:5) [sn2] (n3)		pmol/mL	501	132.232	64.0195	124.384	[86.166 to 163.558]	0	22.717	550	118.24	42.2299	113.914	[88.56 to 138.519]	0	25.9944
LPC(22:6) [sn1]		pmol/mL	501	1248.18	584.164	1154.52	[865.959 to 1527.012]	0	143.428	550	758.193	366.59	685.07	[501.543 to 952.778]	0	137.507
LPC(22:6) [sn2]		pmol/mL	501	625.813	275.249	583.413	[451.752 to 746.633]	0	78.5459	550	398.473	176.163	367.102	[270.604 to 487.993]	0	100.548
LPC(24:0) [sn1]		pmol/mL	501	48.3677	16.492	44.8232	[36.83 to 55.701]	0	9.87677	550	38.0371	10.5271	37.645	[30.809 to 43.542]	0	11.8361
LPC(24:0) [sn2]		pmol/mL	501	30.3476	10.9083	28.4847	[22.437 to 34.753]	0	4.44416	550	23.6446	7.15213	23.4211	[18.838 to 27.267]	0	6.51053
LPC(26:0) [sn1]		pmol/mL	501	9.96259	3.81856	9.43468	[7.717 to 11.318]	0	1.91423	550	10.2345	3.62011	9.7923	[8.112 to 12.004]	0	2.35708
LPC(26:0) [sn2]		pmol/mL	501	11.2419	4.46245	10.8018	[8.429 to 13.084]	0	1.52512	550	11.6829	4.24547	11.3148	[9.15 to 13.571]	0	2.34931
LPC(O-16:0)		pmol/mL	501	1395.14	619.023	1231.37	[969.216 to 1709.333]	0	285.563	550	1469.72	734.571	1232.96	[965.117 to 1797.44]	0	334.265
LPC(O-18:0)		pmol/mL	501	256.231	122.855	235.378	[165.902 to 310.679]	0	51.2627	550	266.902	127.858	227.361	[182.792 to 315.141]	0	43.3538
LPC(O-18:1)		pmol/mL	501	1012.02	514.59	813.592	[681.819 to 1219.063]	0	246.116	550	823.19	478.092	630.332	[495.134 to 1077.236]	0	179.366
LPC(O-20:0)		pmol/mL	501	52.646	19.8372	50.1933	[38.952 to 62.637]	0	10.8629	550	54.9102	21.6988	50.7166	[41.951 to 63.883]	0	9.57278
LPC(O-20:1)		pmol/mL	501	45.8124	20.7293	40.2257	[31.086 to 54.907]	0	11.6338	550	47.0869	25.6327	38.7337	[30.883 to 56.975]	0	12.4908
LPC(O-22:0)		pmol/mL	501	66.5883	17.0724	66.6751	[54.951 to 75.664]	0	12.7064	550	66.228	17.3683	65.9122	[55.069 to 75.272]	0	21.4073
LPC(O-22:1)		pmol/mL	501	78.0116	28.022	73.4534	[58.237 to 94.279]	0	16.0255	550	72.9381	30.4449	67.9916	[53.777 to 85.209]	0	20.3922
LPC(O-24:0)		pmol/mL	501	159.262	44.4084	157.324	[127.806 to 185.493]	0	27.5145	550	163.597	43.9861	160.71	[133.156 to 191.495]	0	54.0644
LPC(O-24:1)		pmol/mL	501	119.08	36.0074	116.063	[94.513 to 138.497]	0	24.567	550	111.402	35.1108	108.376	[86.051 to 129.076]	0	39.2958
LPC(O-24:2)		pmol/mL	501	38.2865	14.346	35.877	[27.865 to 45.21]	0	8.12517	550	31.6407	12.83	29.1868	[22.619 to 38.337]	0	8.09347
LPC(P-16:0)		pmol/mL	501	164.494	74.9884	146.388	[110.894 to 194.761]	0	41.1698	550	155.123	79.2737	133.107	[96.645 to 196.275]	0	35.6281
LPC(P-17:0) (a)		pmol/mL	501	13.2105	9.1054	12.0306	[6.024 to 17.939]	0	1.10634	550	16.1415	9.0153	14.4463	[9.667 to 20.175]	0	1.86466
LPC(P-17:0) (b)		pmol/mL	501	7.52473	4.15912	6.74385	[4.275 to 9.632]	0	1.56539	550	8.66888	4.61638	7.65659	[5.48 to 10.692]	0	1.49801
LPC(P-18:0)		pmol/mL	501	41.3202	19.6407	38.453	[26.731 to 51.501]	0	6.02631	550	38.7233	19.0409	34.5884	[25.072 to 48.474]	0	5.86005
LPC(P-18:1)		pmol/mL	501	20.6842	11.3352	17.4647	[13.32 to 24.737]	0	3.36901	550	18.6821	11.29	14.8019	[10.643 to 23.062]	0	4.06495
LPC(P-20:0)		pmol/mL	501	4.15256	1.24077	4.07914	[3.287 to 4.903]	0	1.26695	550	3.76656	1.16573	3.61355	[2.951 to 4.409]	0	0.919721
PE(15-MHDA_18:1)		pmol/mL	501	33.1336	16.4618	29.0214	[20.845 to 42.102]	0	7.10896	550	68.9999	35.2496	62.5447	[42.761 to 89.795]	0	14.0874
PE(15-MHDA_18:2)		pmol/mL	501	66.8989	40.7364	57.8972	[35.643 to 89.315]	0	10	550	139.642	73.313	130.575	[83.852 to 180.754]	0	11.6148
PE(15-MHDA_20:4)		pmol/mL	501	56.2514	32.558	51.4873	[27.998 to 76.773]	0	5.71493	550	123.057	57.5542	117.056	[81.304 to 160.68]	0	11.1473
PE(15-MHDA_22:6)		pmol/mL	501	45.6588	28.9281	42.8238	[21.883 to 65.071]	0	2.41058	550	87.5714	42.0172	83.704	[55.144 to 110.746]	0	2.30509
PE(16:0_16:0)		pmol/mL	501	48.2747	21.5854	44.8256	[32.126 to 61.173]	0	6.36457	550	54.6909	28.2684	47.9474	[33.312 to 68.198]	0	14.9403
PE(16:0_16:1)		pmol/mL	501	64.9885	30.7225	59.1225	[42.628 to 82.031]	0	9.05399	550	120.705	77.27	103.91	[65.531 to 153.957]	0	17.0334
PE(16:0_18:1)		pmol/mL	501	1461.06	656.762	1357.15	[987.905 to 1775.38]	0	309.377	550	1780.35	711.506	1678.71	[1267.726 to 2202.656]	0	366.217
PE(16:0_18:2)		pmol/mL	501	6104.91	3246.17	5267.89	[3771.927 to 7627.344]	0	1306.96	550	7550.39	3011.17	7393.49	[5196.969 to 9366.852]	0	1321.1
PE(16:0_18:3) (a)		pmol/mL	501	46.2669	26.2208	40.945	[26.995 to 57.799]	0	6.18546	550	86.7237	44.9724	80.0149	[52.769 to 116.238]	0	8.00902
PE(16:0_18:3) (b)		pmol/mL	501	46.5118	27.7837	38.844	[29.295 to 55.878]	0	8.2628	550	95.4199	59.0867	82.5878	[56.246 to 121.582]	0	14.2844
PE(16:0_20:3)		pmol/mL	501	1395.05	654.03	1294.06	[911.457 to 1743.742]	0	326.59	550	2153.72	1014.08	2004.15	[1381.443 to 2687.589]	0	362.615
PE(16:0_20:4)		pmol/mL	501	5194.81	1793.09	4969.19	[3926.853 to 6340.515]	0	1693.35	550	6641.63	2179.3	6495.36	[5113.379 to 7803.542]	0	1723.23
PE(16:0_20:5)		pmol/mL	501	147.322	75.5304	132.706	[91.52 to 183.958]	0	25.4295	550	355.073	220.766	296.311	[194.029 to 462.099]	0	36.4636
PE(16:0_22:6)		pmol/mL	501	6625.64	2678.64	6318.18	[4755.852 to 8103.5]	0	1723.72	550	7615.74	2807.52	7191.44	[5639.207 to 9038.664]	0	1298.81
PE(16:1_18:2)		pmol/mL	501	20.7478	10.668	18.8134	[13.037 to 25.465]	0	3.42316	550	30.8061	15.9369	28.0509	[19.202 to 39.163]	0	5.32469
PE(16:1_20:4)		pmol/mL	501	27.7258	12.9926	25.5652	[18.839 to 33.873]	0	6.70873	550	45.717	20.5503	42.7172	[30.74 to 58.445]	0	7.62225
PE(17:0_18:1)		pmol/mL	501	90.4068	39.7847	83.0094	[61.681 to 113.224]	0	21.5957	550	140.716	65.0786	128.903	[94.616 to 175.316]	0	26.2815
PE(17:0_18:2)		pmol/mL	501	217.917	102.326	200.002	[143.125 to 270.74]	0	31.7312	550	320.627	141.381	301.069	[212.234 to 403.089]	0	61.3624
PE(17:0_20:4)		pmol/mL	501	201.748	73.6478	194.278	[148.797 to 242.888]	0	45.4505	550	295.472	102.937	283.604	[225.404 to 351.602]	0	72.9055
PE(17:0_22:6)		pmol/mL	501	91.721	44.4584	85.9581	[59.979 to 116.155]	0	7.58318	550	120.152	48.069	114.387	[85.931 to 146.798]	0	14.2004
PE(18:0_18:1)		pmol/mL	501	2903.5	1486.56	2608.95	[1866.461 to 3609.704]	0	325.818	550	2749.29	1294.85	2534.97	[1778.036 to 3469.266]	0	530.096
PE(18:0_18:2)		pmol/mL	501	14278.6	6730.52	12954.5	[9399.831 to 17928.703]	0	1254.69	550	15616	6465.03	14891.9	[10789.033 to 19655.817]	0	2543.57
PE(18:0_20:3) (a)		pmol/mL	501	1121.18	467.544	1055.62	[781.108 to 1364.261]	0	295.914	550	1429.3	537.89	1385.13	[1029.503 to 1720.174]	0	325.423
PE(18:0_20:3) (b)		pmol/mL	501	105.592	40.9652	98.0145	[77.016 to 129.356]	0	32.7214	550	165.156	82.9375	148.294	[106.817 to 196.314]	0	50.1302
PE(18:0_20:4)		pmol/mL	501	13499.5	4234.28	13075.1	[10540.194 to 16036.205]	0	3597.77	550	14581.9	4552.84	14309.4	[11706.988 to 17034.606]	0	3419.61
PE(18:0_22:4)		pmol/mL	501	239.404	96.1312	223.027	[171.368 to 294.743]	0	50.2459	550	279.022	107.22	264.859	[210.672 to 323.243]	0	61.5786
PE(18:0_22:5) (n3)		pmol/mL	501	602.951	273.301	570.224	[388.072 to 786.402]	0	107.4	550	822.663	316.643	778.943	[599.693 to 994.877]	0	186.033
PE(18:0_22:5) (n6)		pmol/mL	501	270.93	123.14	244.644	[180.469 to 340.351]	0	61.0107	550	355.15	154.417	330.723	[252.35 to 428.927]	0	52.2447
PE(18:0_22:6)		pmol/mL	501	4364.58	1823.13	4185.3	[3058.988 to 5442.382]	0	931.224	550	4208.79	1543.18	3954.12	[3149.894 to 5235.148]	0	822.36
PE(18:1_18:1)		pmol/mL	501	3157.38	2108.43	2646.16	[1598.33 to 3991.424]	0	266.238	550	2516.89	1578.13	2121.79	[1398.956 to 3208.381]	0	380.963
PE(18:1_18:2)		pmol/mL	501	4978.37	2885.97	4401.86	[2922.148 to 6467.77]	0	359.125	550	4464.64	2297.44	4119.38	[2717.76 to 5871.086]	0	600.535
PE(18:1_22:6) (a)		pmol/mL	501	781.286	379.187	717.849	[521.18 to 987.37]	0	177.939	550	637.007	268.328	594.914	[451.72 to 763.905]	0	98.354
PE(18:1_22:6) (b)		pmol/mL	501	197.037	117	172.181	[113.949 to 263.948]	0	18.1009	550	267.478	121.191	253.212	[176.123 to 339.761]	0	11.9627
PE(20:0_20:4)		pmol/mL	501	63.0496	30.3748	55.175	[41.64 to 76.063]	0	12.6493	550	57.1796	33.0956	50.5043	[39.604 to 65.853]	0	13.5716
PE(36:0)		pmol/mL	501	116.456	11.0242	115.754	[108.988 to 123.694]	0	86.6222	550	120.635	11.9004	120.214	[112.373 to 129.174]	0	88.0008
PE(38:5) (a)		pmol/mL	501	1027.06	417.864	979.281	[722.106 to 1254.919]	0	171.089	550	1399.31	565.954	1318.58	[999.66 to 1716.41]	0	260.907
PE(38:5) (b)		pmol/mL	501	444.616	202.392	427.346	[294.393 to 555.288]	0	82.4845	550	792.579	391.469	732.433	[505.977 to 986.281]	0	121.372
PE(O-16:0/18:2)		pmol/mL	501	276.845	119.569	260.528	[196.756 to 333.262]	0	15.9348	550	328.966	124.099	311.994	[242.397 to 392.387]	0	79.6565
PE(O-16:0/20:3)		pmol/mL	501	75.4341	46.0122	69.1115	[40.375 to 99.661]	0	5.58935	550	92.1107	42.104	85.3337	[61.922 to 116.564]	0	14.6964
PE(O-16:0/20:4)		pmol/mL	501	1702.96	643.105	1607.21	[1291.236 to 2002.619]	0	226.548	550	1590.55	613.571	1474.83	[1195.248 to 1868.813]	0	452.805
PE(O-16:0/22:4)		pmol/mL	501	171.933	74.0869	159.576	[120.29 to 204.965]	0	31.6748	550	166.042	51.4103	159.219	[130.166 to 194.535]	0	51.8029
PE(O-16:0/22:6)		pmol/mL	501	1474.75	649.94	1389.89	[1037.064 to 1824.182]	0	244.049	550	1047.02	404.936	970.444	[784.205 to 1223.161]	0	257.553
PE(O-18:0/20:4)		pmol/mL	501	950.629	568.117	840.763	[477.445 to 1277.112]	0	118.867	550	992.759	552.24	875.04	[656.056 to 1146.736]	0	178.355
PE(O-18:0/22:5)		pmol/mL	501	506.766	412.3	460.897	[115.72 to 765.445]	0	20.1675	550	416.21	212.159	390.579	[268.778 to 530.367]	0	55.5725
PE(O-18:0/22:6)		pmol/mL	501	779.803	456.157	714.195	[390.228 to 1083.47]	0	101.649	550	564.341	254.958	499.481	[403.634 to 667.486]	0	155.468
PE(O-18:1/18:2)		pmol/mL	501	191.914	73.0491	181.344	[140.481 to 228.078]	0	3.38735	550	146.214	69.8734	133.781	[103.831 to 175.521]	0	29.8353
PE(O-18:1/22:6)		pmol/mL	501	659.797	373.833	582.961	[397.099 to 845.982]	0	83.3436	550	318.35	223.302	255.049	[188.523 to 360.873]	0	63.466
PE(O-34:1)		pmol/mL	501	514.149	194.957	503.716	[363.09 to 632.637]	0	33.4964	550	379.601	157.795	353.637	[272.75 to 447.956]	0	107.855
PE(O-36:5)		pmol/mL	501	157.189	92.8755	136.48	[91.197 to 193.831]	0	9.05046	550	200.023	101.017	181.297	[127.77 to 247.082]	0	32.7626
PE(O-38:5) (a)		pmol/mL	501	1600.31	912.355	1502.18	[826.209 to 2111.282]	0	107.187	550	1374.87	627.909	1273.27	[956.452 to 1658.622]	0	289.315
PE(O-38:5) (b)		pmol/mL	501	292.586	160.044	271.283	[155.938 to 389.829]	0	43.7362	550	319.248	127.307	305.626	[232.11 to 392.286]	0	72.9505
PE(P-15:0/20:4) (a)		pmol/mL	501	96.3208	119.641	59.1073	[27.055 to 127.788]	0	5.45384	550	200.986	121.722	179.838	[118.683 to 260.849]	0	9.6893
PE(P-15:0/20:4) (b)		pmol/mL	501	55.2977	36.7503	49.0008	[31.989 to 68.238]	0	2.33055	550	96.3931	51.6601	87.3515	[60.019 to 121.941]	0	8.08244
PE(P-15:0/22:6) (a)		pmol/mL	501	157.698	184.598	77.0178	[28.241 to 245.917]	0	6.75912	550	281.901	151.788	254.672	[177.848 to 366.659]	0	7.91457
PE(P-15:0/22:6) (b)		pmol/mL	501	93.7794	34.4887	91.2912	[73.267 to 112.644]	0	14.7028	550	97.2918	32.5588	93.4218	[75.71 to 117.067]	0	17.7537
PE(P-16:0/18:1)		pmol/mL	501	2157.41	597.777	2105.32	[1753.298 to 2477.972]	0	763.292	550	2315.02	787.07	2143.69	[1825.132 to 2670.777]	0	844.917
PE(P-16:0/18:2)		pmol/mL	501	5540.05	2013.99	5302.84	[4215.573 to 6560.871]	0	271.223	550	6093.57	2129.26	5852.07	[4654.615 to 7209.116]	0	1615.86
PE(P-16:0/18:3)		pmol/mL	501	120.129	66.6954	105.979	[78.706 to 142.799]	0	13.9255	550	173.094	100.897	151.365	[118.327 to 205.384]	0	42.5302
PE(P-16:0/20:3) (a)		pmol/mL	501	987.15	479.816	929.804	[609.875 to 1257.361]	0	198.969	550	1062.96	449.596	1007.22	[773.527 to 1254.143]	0	220.068
PE(P-16:0/20:3) (b)		pmol/mL	501	229.652	97.9847	226.132	[155.879 to 288.739]	0	30.0073	550	268.509	109.088	253.665	[201.259 to 314.266]	0	58.2769
PE(P-16:0/20:4)		pmol/mL	501	18740	6201.9	18424.3	[14247.513 to 22677.426]	0	3920.01	550	15247.9	5446.16	14388.5	[11525.276 to 17697.572]	0	4209.59
PE(P-16:0/20:5)		pmol/mL	501	1305.6	934.377	1138.31	[681.405 to 1678.509]	0	64.2313	550	1527.65	754.721	1434.49	[1037.444 to 1848.557]	0	202.278
PE(P-16:0/22:4)		pmol/mL	501	1406.34	433.265	1334.02	[1105.4 to 1646.272]	0	552.194	550	1240.4	379.96	1188.52	[1005.574 to 1405.819]	0	400.764
PE(P-16:0/22:5) (n3)		pmol/mL	501	3779.18	2077.34	3610.44	[1921.819 to 5137.066]	0	400.448	550	3251.82	1235.64	3108.39	[2413.005 to 3891.388]	0	876.759
PE(P-16:0/22:5) (n6)		pmol/mL	501	579.431	219.326	539.986	[432.02 to 694.322]	0	170.685	550	528.714	177.846	499.372	[410.392 to 615.001]	0	152.094
PE(P-16:0/22:6)		pmol/mL	501	17899.5	6599.89	17111.9	[13442.597 to 22172.096]	0	4300.35	550	11623.1	4416.28	10741.4	[8676.491 to 13772.198]	0	3247.57
PE(P-17:0/20:4) (a)		pmol/mL	501	1231.11	745.077	1281.89	[501.082 to 1777.877]	0	75.4261	550	1286.81	540.6	1186.01	[928.006 to 1573.742]	0	180.706
PE(P-17:0/20:4) (b)		pmol/mL	501	1316.96	627.194	1362.35	[742.751 to 1762.075]	0	138.952	550	1283.82	469.489	1222.27	[951.162 to 1526.244]	0	291.046
PE(P-17:0/22:6) (a)		pmol/mL	501	557.785	365.134	549.004	[213.319 to 811.362]	0	20.4402	550	459.401	191.272	432.414	[336.239 to 555.3]	0	42.644
PE(P-17:0/22:6) (b)		pmol/mL	501	720.361	349.298	694.375	[440.822 to 965.326]	0	104.577	550	558.743	210.988	522.916	[419.388 to 661.083]	0	128.643
PE(P-18:0/18:1)		pmol/mL	501	2144.57	701.832	2067.16	[1636.84 to 2594.406]	0	195.506	550	2441.92	786.617	2304.39	[1933.412 to 2784.966]	0	810.173
PE(P-18:0/18:2)		pmol/mL	501	5914.72	1986.35	5734.89	[4511.46 to 7148.956]	0	98.3997	550	7633.36	2240.69	7376.95	[6056.875 to 9001.941]	0	2185.87
PE(P-18:0/18:3)		pmol/mL	501	83.7622	48.8489	74.8801	[54.078 to 102.951]	0	5.45265	550	147.946	108.916	129.82	[99.139 to 171.76]	0	24.0767
PE(P-18:0/20:3) (a)		pmol/mL	501	1076.51	577.675	1025.84	[582.004 to 1455.27]	0	87.2638	550	1201.25	446.404	1152.06	[902.965 to 1423.475]	0	325.658
PE(P-18:0/20:3) (b)		pmol/mL	501	239.407	122.398	232.264	[138.776 to 321.711]	0	22.3031	550	295.088	108.924	281.518	[222.797 to 349.515]	0	73.5267
PE(P-18:0/20:4)		pmol/mL	501	21937.8	9246.56	21649.6	[14194.591 to 29008.205]	0	2919.57	550	19517.1	7195.68	18508.2	[14662.023 to 22831.537]	0	4694.41
PE(P-18:0/20:5)		pmol/mL	501	1616.25	1281.3	1443.82	[610.424 to 2223.951]	0	50.7417	550	2081.14	971.196	1946.03	[1418.523 to 2543.39]	0	277.327
PE(P-18:0/22:4)		pmol/mL	501	1018.52	364.131	945.525	[760.194 to 1209.739]	0	244.566	550	975.502	382.879	901.437	[755.403 to 1138.205]	0	253.534
PE(P-18:0/22:5) (n3)		pmol/mL	501	1753.07	1165.85	1731.48	[599.618 to 2575.686]	0	131.503	550	1524.45	585.184	1446.51	[1132.666 to 1848.601]	0	295.224
PE(P-18:0/22:5) (n6)		pmol/mL	501	306.586	129.053	297.977	[200.853 to 385.921]	0	73.7491	550	308.074	115.223	293.998	[238.354 to 356.201]	0	99.5991
PE(P-18:0/22:6)		pmol/mL	501	9294.94	4395.18	8794.66	[5904.502 to 12091.704]	0	1362.59	550	6517.59	2639.61	5902.9	[4656.828 to 7726.62]	0	1521
PE(P-18:1/18:1)		pmol/mL	501	2585.18	872.662	2502.74	[1930.264 to 3146.761]	0	185.43	550	1825.66	666.422	1703.06	[1383.003 to 2159.497]	0	531.602
PE(P-18:1/18:1) (a)		pmol/mL	501	2244.48	737.188	2180.36	[1710.508 to 2668.791]	0	156.315	550	1473.97	575.17	1359.85	[1074.057 to 1721.153]	0	426.865
PE(P-18:1/18:1) (b)		pmol/mL	501	346.809	179.828	332.134	[179.392 to 478.456]	0	29.6525	550	358.809	139.985	341.186	[266.279 to 418.021]	0	63.8428
PE(P-18:1/18:2) (a)		pmol/mL	501	3863.45	1225.59	3683.42	[3080.071 to 4537.825]	0	73.0111	550	2959.8	1100.27	2815.57	[2201.452 to 3547.694]	0	574.27
PE(P-18:1/18:2) (b)		pmol/mL	501	696.578	325.357	670.432	[435.601 to 909.359]	0	13.3877	550	831.449	302.846	799.418	[637.299 to 976.655]	0	168.822
PE(P-18:1/18:3)		pmol/mL	501	81.0958	33.6603	76.0808	[58.225 to 97.304]	0	2.62702	550	84.7553	65.9293	75.7082	[55.245 to 99.27]	0	16.0293
PE(P-18:1/20:3) (a)		pmol/mL	501	567.565	280.481	556.721	[335.925 to 745.703]	0	49.0393	550	457.51	175.422	430.637	[337.442 to 542.849]	0	84.6236
PE(P-18:1/20:3) (b)		pmol/mL	501	232.878	136.28	224.499	[109.379 to 329.035]	0	10.2894	550	237.187	95.6562	227.596	[174.132 to 290.21]	0	40.4364
PE(P-18:1/20:4) (a)		pmol/mL	501	13771.3	4985.43	13539.3	[10053.796 to 17048.783]	0	1310.84	550	8549.11	3737.96	7706	[5857.442 to 10368.871]	0	1803.15
PE(P-18:1/20:4) (b)		pmol/mL	501	2261.04	1375.53	2306.91	[905.961 to 3293.709]	0	119.678	550	1882.18	775.06	1775.62	[1351.37 to 2248.853]	0	400.024
PE(P-18:1/20:5) (a)		pmol/mL	501	983.96	715.719	892.904	[485.981 to 1296.489]	0	18.9743	550	895.926	437.924	812.905	[601.05 to 1103.851]	0	92.3634
PE(P-18:1/20:5) (b)		pmol/mL	501	213.695	185.173	184.384	[57.918 to 315.161]	0	1.37315	550	247.052	136.966	227.249	[143.505 to 320.377]	0	15.3242
PE(P-18:1/22:4)		pmol/mL	501	350.985	94.736	341.366	[286.415 to 404.179]	0	118.651	550	287.289	72.4223	280.468	[238.619 to 321.435]	0	75.9954
PE(P-18:1/22:5) (a)		pmol/mL	501	1525.07	974.566	1521.39	[563.119 to 2209.705]	0	56.6483	550	904.037	404.259	823.727	[651.06 to 1056.592]	0	262.926
PE(P-18:1/22:5) (b)		pmol/mL	501	367.229	145.758	359.449	[252.864 to 453.405]	0	86.4337	550	269.126	98.0733	247.822	[204.561 to 312.263]	0	63.009
PE(P-18:1/22:6) (a)		pmol/mL	501	10987.2	4872.34	10383.2	[7935.637 to 13597.936]	0	1422.31	550	5191.19	2934.29	4582.32	[3282.655 to 6179.054]	0	1259.72
PE(P-18:1/22:6) (b)		pmol/mL	501	1513.84	984.799	1389.03	[612.311 to 2198.994]	0	92.3308	550	958.706	439.782	871.006	[660.025 to 1151.292]	0	114.375
PE(P-19:0/20:4) (a)		pmol/mL	501	52.6464	30.4827	54.3022	[22.926 to 74.149]	0	2.58519	550	72.4302	27.4131	69.8405	[54.556 to 86.596]	0	13.1795
PE(P-19:0/20:4) (b)		pmol/mL	501	118.807	40.3017	119.599	[89.231 to 146.445]	0	15.3576	550	148.035	50.5962	140.031	[115.981 to 172.925]	0	41.1202
PE(P-20:0/18:1)		pmol/mL	501	477.261	141.902	453.839	[378.849 to 555.88]	0	56.8553	550	630.356	209.825	597.444	[485.73 to 711.044]	0	234.712
PE(P-20:0/18:2)		pmol/mL	501	705.36	290.877	653.001	[502.365 to 853.103]	0	8.87395	550	1035.6	320.426	992.04	[808.467 to 1221.184]	0	268.845
PE(P-20:0/20:4)		pmol/mL	501	1667.32	499.826	1633.44	[1301.385 to 1961.97]	0	345.237	550	1577.18	533.77	1492.65	[1217.699 to 1850.726]	0	351.607
PE(P-20:0/22:6)		pmol/mL	501	876.893	286.893	851.806	[698.335 to 1044.895]	0	93.2213	550	754.95	278.73	718.126	[567.185 to 890.188]	0	172.917
PE(P-20:1/20:4)		pmol/mL	501	339.44	100.587	327.121	[270.173 to 394.954]	0	78.317	550	366.185	134.938	350.734	[267.813 to 433.931]	0	69.1903
PE(P-20:1/22:6)		pmol/mL	501	322.477	112.143	312.086	[243.537 to 386.797]	0	47.9086	550	308.657	118.223	283.387	[226.271 to 369.55]	0	70.4666
LPE(16:0) [sn1]		pmol/mL	501	1083.57	331.901	1060.54	[869.252 to 1283.376]	0	272.684	550	1039.32	371.314	995.464	[774.18 to 1219.023]	0	297.31
LPE(16:0) [sn2]		pmol/mL	501	375.108	116.194	368.7	[297.171 to 440.751]	0	82.2473	550	359.498	122.354	343.585	[276.005 to 425.319]	0	76.3812
LPE(17:0) [sn1]		pmol/mL	501	101.818	34.7744	96.0031	[78.806 to 120.37]	0	29.4644	550	107.108	35.9466	101.639	[83.355 to 127.069]	0	28.4451
LPE(17:0) [sn2]		pmol/mL	501	84.5501	22.9379	83.1503	[69.67 to 97.355]	0	26.205	550	98.0417	26.5678	95.7714	[79.47 to 113.297]	0	28.0665
LPE(18:0) [sn1]		pmol/mL	501	1385.3	506.216	1268.87	[1078.155 to 1574.162]	0	314.018	550	1298.37	565.239	1162.8	[923.599 to 1524.45]	0	297.751
LPE(18:0) [sn2]		pmol/mL	501	530.646	192.047	496.415	[407.975 to 608.796]	0	116.137	550	501.126	219.197	449.644	[356.653 to 600.653]	0	96.2049
LPE(18:1) [sn1]		pmol/mL	501	1544.14	680.665	1441.54	[1052.241 to 1937.862]	0	263.819	550	1201.45	550.875	1090.92	[846.225 to 1475.161]	0	287.375
LPE(18:1) [sn2]		pmol/mL	501	835.132	368.332	774.714	[560.307 to 1055.659]	0	150.03	550	632.826	293.601	576.926	[435.096 to 793.624]	0	134.107
LPE(18:2) [sn1]		pmol/mL	501	2327.43	965.267	2174.58	[1623.411 to 2905.381]	0	312.781	550	1816.45	753.061	1710.81	[1262.841 to 2319.357]	0	392.483
LPE(18:2) [sn2]		pmol/mL	501	1183.75	494.048	1137.58	[822.592 to 1496.953]	0	174.093	550	917.581	388.801	868.804	[623.849 to 1159.288]	0	170.022
LPE(20:4) [sn1]		pmol/mL	501	924.156	343.802	879.123	[675.657 to 1094.451]	0	89.6475	550	701.535	248.137	673.153	[530.619 to 815.785]	0	184.946
LPE(20:4) [sn2]		pmol/mL	501	444.545	167.869	417.736	[328.428 to 541.079]	0	59.3786	550	344.744	113.738	332.267	[266.211 to 407.335]	0	77.5864
LPE(22:6) [sn1]		pmol/mL	501	446.12	248.156	405.804	[268.947 to 568.187]	0	27.47	550	250.294	138.354	217.898	[147.33 to 314.169]	0	40.3849
LPE(22:6) [sn2]		pmol/mL	501	161.377	95.7261	142.631	[95.163 to 211.118]	0	11.0139	550	91.7318	49.6647	81.536	[55.7 to 115.776]	0	11.0763
LPE(P-16:0)		pmol/mL	501	88.7504	45.385	76.7368	[56.583 to 105.994]	0	17.709	550	77.9267	47.1313	61.3089	[47.529 to 94.601]	0	16.4955
LPE(P-18:0)		pmol/mL	501	120.727	62.4844	107.75	[76.631 to 151.508]	0	20.0041	550	110.526	63.564	90.8759	[68.149 to 132.413]	0	25.9278
LPE(P-18:1)		pmol/mL	501	69.0929	41.9252	56.71	[40.871 to 81.355]	0	9.16825	550	49.6012	32.2741	37.7697	[27.467 to 60.42]	0	11.8293
LPE(P-20:0)		pmol/mL	501	27.1392	7.88217	26.1116	[21.612 to 31.226]	0	7.3421	550	26.973	9.18718	24.8841	[20.702 to 31.12]	0	11.3654
PI (38:5) (b)		pmol/mL	501	709.107	248.173	704.188	[538.002 to 852.066]	0	133.504	550	1015.67	368.904	976.344	[760.9 to 1221.643]	0	231.908
PI(15-MHDA_20:4)\PI(17:0_20:4)		pmol/mL	501	287.824	84.216	282.442	[232.412 to 339.54]	0	76.7495	550	327.597	98.9784	328.362	[263.343 to 387.05]	0	76.0735
PI(16:0_16:1)		pmol/mL	501	269.652	114.942	257.879	[186.652 to 333.957]	0	61.8874	550	621.021	382.65	524.807	[343.655 to 789.293]	0	86.0502
PI(16:0_20:3) (a)		pmol/mL	501	1008.69	307.91	962.204	[818.524 to 1161.776]	0	276.315	550	1131.78	356.575	1102.39	[883.198 to 1349.502]	0	304.019
PI(16:0_20:3) (b)		pmol/mL	501	148.525	53.7391	147.105	[108.135 to 180.748]	0	35.1791	550	225.715	109.92	205.913	[146.095 to 278.304]	0	48.6913
PI(16:0_20:4)		pmol/mL	501	4830.12	1511.31	4624	[3779.332 to 5638.631]	0	1278.71	550	3997.63	1355.67	3934.27	[3173.386 to 4706.593]	0	738.871
PI(16:0/16:0)		pmol/mL	501	193.487	76.8415	184.201	[138.874 to 234.214]	0	50.5705	550	342.821	172.245	309.76	[216.187 to 438.38]	0	40.6423
PI(17:0_18:1)		pmol/mL	501	365.508	154.817	340.459	[251.177 to 450.485]	0	71.5177	550	869.117	443.265	790.122	[554.293 to 1081.827]	0	108.042
PI(17:0_18:2)		pmol/mL	501	144.487	40.8048	140.292	[116.648 to 168.555]	0	34.8777	550	228.18	70.261	221.577	[178.454 to 271.957]	0	51.8447
PI(18:0_18:1)		pmol/mL	501	2657.62	865.558	2556.67	[2078.787 to 3188.804]	0	315.128	550	3884.04	1337.96	3726.61	[2917.883 to 4623.965]	0	973.053
PI(18:0_20:2)		pmol/mL	501	315.219	94.8359	305.056	[252.229 to 370.659]	0	50.4748	550	351.754	109.277	344.166	[277.529 to 415.588]	0	97.2641
PI(18:0_20:3) (a)		pmol/mL	501	4665.45	1635.36	4380.99	[3623.719 to 5293.881]	0	1066.13	550	4501.31	1452.04	4229.32	[3572.193 to 5208.815]	0	1708.39
PI(18:0_20:3) (b)		pmol/mL	501	792.174	395.57	769.243	[477.182 to 1029.596]	0	114.762	550	1060.77	537.989	945.477	[701.512 to 1314.225]	0	162.1
PI(18:0_20:4)		pmol/mL	501	41613.2	11039.8	40603.1	[34244.227 to 47745.121]	0	9273	550	34193.3	9298.83	34467	[27777.584 to 39419.754]	0	9329.33
PI(18:0_22:4)		pmol/mL	501	606.636	206.595	587.622	[461.686 to 725.354]	0	143.054	550	668.249	202.376	648.688	[527.019 to 790.084]	0	190.096
PI(18:0_22:5) (n3)		pmol/mL	501	2105.87	975.823	2019.45	[1301.516 to 2700.069]	0	403.761	550	2826.3	1003.7	2698.68	[2104.868 to 3446.418]	0	758.692
PI(18:0_22:5) (n6)		pmol/mL	501	329.908	114.198	315.935	[259.707 to 390.472]	0	91.8738	550	417.384	182.676	380.797	[305.386 to 483.121]	0	130.816
PI(18:0_22:6)		pmol/mL	501	2222.65	838.444	2114.54	[1672.483 to 2726.683]	0	472.636	550	2520.52	949.971	2344.6	[1876.994 to 2951.987]	0	484.72
PI(18:1_18:2)		pmol/mL	501	904.237	430.659	778.106	[592.189 to 1150.649]	0	151.904	550	749.009	340.945	680.053	[510.154 to 887.238]	0	115.286
PI(20:0_20:4)		pmol/mL	501	142.368	72.759	121.72	[93.027 to 171.897]	0	19.9254	550	86.0679	39.7995	78.8339	[59.753 to 101.138]	0	13.6428
PI(34:0)		pmol/mL	501	54.3087	21.5063	50.9857	[38.206 to 68.12]	0	12.1979	550	90.3405	38.881	83.5447	[60.354 to 112.79]	0	18.1733
PI(34:1)		pmol/mL	501	3312.88	991.57	3181.79	[2652.801 to 3852.689]	0	702.03	550	5185.13	1875.72	4883.8	[3820.268 to 6367.184]	0	1432.98
PI(36:2)		pmol/mL	501	13885.6	4842.84	12986.4	[10229.886 to 16493.631]	0	2307.72	550	15803.1	4495.41	15270	[12804.62 to 18520.697]	0	4059.42
PI(37:6)		pmol/mL	501	79.3795	31.2727	75.5998	[56.622 to 97.115]	0	10.8716	550	75.7922	30.1078	72.4442	[55.102 to 93.108]	0	17.8727
PI(38:5) (a)		pmol/mL	501	995.79	288.742	952.222	[820.737 to 1142.67]	0	272.032	550	981.604	291.189	944.164	[790.646 to 1117.161]	0	319.431
PI(38:6)		pmol/mL	501	724.619	278.684	675.319	[533.166 to 883.605]	0	190.029	550	721.755	269.499	672.75	[538.697 to 864.224]	0	179.459
PI(39:6)		pmol/mL	501	46.4204	20.707	43.7293	[32.905 to 58.25]	0	6.27342	550	64.2004	26.8748	60.1129	[47.573 to 76.494]	0	7.7888
PIP1(38:4)		pmol/mL	501	6.17294	2.02303	5.90991	[4.712 to 7.17]	0	2.08828	550	6.00372	2.11616	5.61579	[4.616 to 6.997]	0	2.13633
LPI(18:0) [sn1]		pmol/mL	501	267.103	84.0415	261.043	[210.817 to 316.728]	0	29.3801	550	259.339	87.2113	252.486	[197.381 to 309.53]	0	51.7096
LPI(18:0) [sn2]		pmol/mL	501	76.3315	33.8699	72.3859	[52.186 to 92.881]	0	7.07143	550	76.7571	35.8982	73.1578	[52.904 to 94.694]	0	6.33604
LPI(18:1) [sn1]		pmol/mL	501	386.039	161.895	359.021	[276.273 to 461.144]	0	31.9554	550	386.186	152.343	361.037	[278.357 to 465.934]	0	114.32
LPI(18:1) [sn2]		pmol/mL	501	103.749	44.2439	95.9899	[72.81 to 127.717]	0	12.9544	550	107.088	45.6008	100.623	[74.264 to 132.83]	0	18.8122
LPI(18:2) [sn1]		pmol/mL	501	649.689	251.823	604.466	[466.357 to 802.34]	0	96.4312	550	558.497	215.01	529.114	[397.719 to 674.311]	0	101.768
LPI(18:2) [sn2]		pmol/mL	501	196.01	75.3295	183.051	[139.944 to 238.091]	0	38.8553	550	174.466	66.7841	166.159	[127.655 to 209.53]	0	26.1044
LPI(20:4) [sn1]		pmol/mL	501	1083.16	404.403	1017.83	[810.391 to 1272.863]	0	75.7543	550	707.159	257.413	670.188	[532.145 to 820.249]	0	131.292
LPI(20:4) [sn2]		pmol/mL	501	370.578	123.247	352.811	[282.691 to 443.523]	0	55.8606	550	264.702	87.8812	254.706	[201.339 to 313.53]	0	41.8765
PS(36:1)		pmol/mL	501	931.778	774.055	633.097	[435.474 to 1115.781]	0	112.123	550	882.552	995.343	612.811	[412.114 to 1020.967]	0	190.865
PS(36:2)		pmol/mL	501	315.976	241.841	227.37	[162.294 to 370.646]	0	79.4836	550	367.927	287.874	277.389	[194.544 to 433.387]	0	95.229
PS(38:3)		pmol/mL	501	146.354	105.41	107.247	[75.11 to 181.927]	0	25.0279	550	144.493	126.643	105.641	[77.987 to 171.553]	0	32.6587
PS(38:4)		pmol/mL	501	2018.89	1677.1	1346.12	[849.032 to 2550.316]	0	239.934	550	1797.38	1727.04	1265.86	[811.146 to 2222.668]	0	295.321
PS(38:5)		pmol/mL	501	87.5654	46.3541	72.0044	[57.235 to 104.23]	0	36.9245	550	99.2962	61.4907	80.2526	[62.25 to 116.815]	0	36.6658
PS(40:5)		pmol/mL	501	113.309	86.8323	85.391	[56.483 to 143.291]	0	13.7455	550	131.733	96.266	108.156	[68.671 to 159.924]	0	22.3765
PS(40:6)		pmol/mL	501	149.708	134.133	114.505	[78.946 to 183.215]	0	21.6483	550	131.259	127.241	100.347	[68.411 to 156.341]	0	23.5099
PG(34:1)		pmol/mL	501	36.6161	18.4074	33.0741	[23.929 to 45.22]	0	5.66151	550	49.2995	21.9536	45.0245	[33.792 to 62.319]	0	6.03892
PG(36:1)		pmol/mL	501	69.0548	34.3652	61.822	[43.682 to 85.732]	0	9.42896	550	66.8208	29.5528	61.378	[46.389 to 84.303]	0	6.44062
PG(36:2)		pmol/mL	501	62.8296	23.7983	59.5007	[45.384 to 75.328]	0	16.7337	550	75.7022	30.9893	70.8654	[55.453 to 89.554]	0	12.3166
CE(14:0)		pmol/mL	501	8090.99	3788.71	7281.47	[5517.021 to 9754.569]	0	1330.75	550	10317.7	5028.68	9269.82	[6586.944 to 13045.186]	0	1092.48
CE(15:0)		pmol/mL	501	3332.05	1872.81	2868.85	[1951.587 to 4271.875]	0	640.695	550	6353.21	3304.21	5787.35	[3778.215 to 8328.873]	0	987.519
CE(16:0)		pmol/mL	501	183600	35411.3	183440	[160583.05 to 204611.36]	0	79589.2	550	178889	27485.3	178553	[161662.12 to 195113.553]	0	80099.8
CE(16:1)		pmol/mL	501	30086.7	14976.4	27536.1	[18854.09 to 37368.652]	0	8157.86	550	42453.8	21112.5	37988.6	[27427.098 to 53202.184]	0	7344.94
CE(16:2)		pmol/mL	501	442.073	249.298	380.71	[262.965 to 572.874]	0	66.6538	550	660.225	395.633	575.819	[367.199 to 853.827]	0	61.6405
CE(17:0)		pmol/mL	501	9901.42	5791.88	9452.61	[4625.887 to 13570.749]	0	1441.23	550	15868.1	6851.86	15343.8	[10950.197 to 20274.05]	0	2105.28
CE(17:1)		pmol/mL	501	3943.1	2315.4	3316.61	[2231.091 to 5364.169]	0	756.976	550	8033.98	4605.07	7221.92	[4529.037 to 10279.76]	0	874.08
CE(18:0)		pmol/mL	501	31261.8	13684.5	28829.1	[21472.539 to 38030.039]	0	7454.68	550	29932.5	10407.5	28537.6	[23244.63 to 35182.536]	0	7432.9
CE(18:1)		pmol/mL	501	672621	135585	660174	[588764.88 to 746239.88]	0	164831	550	664842	135009	664328	[582097.395 to 739321.425]	0	277519
CE(18:2)		pmol/mL	501	1.30094e+06	219584	1318613	[1173821.3 to 1447784]	0	363850	550	1.30197e+06	204568	1.31044e+06	[1157392 to 1437501.075]	0	615530
CE(18:3)		pmol/mL	501	38813.3	19768.8	35956.8	[23772.48 to 50134.148]	0	4829.22	550	59319.7	29615	54521	[37514.597 to 77762.178]	0	7589.43
CE(20:0)		pmol/mL	501	835.931	316.833	765.511	[628.03 to 968.515]	0	303.475	550	795.413	233.992	757.367	[630.683 to 940.554]	0	313.615
CE(20:1)		pmol/mL	501	990.818	381.969	909.368	[733.538 to 1164.223]	0	314.744	550	856.873	265.352	808.372	[670.37 to 984.815]	0	271.196
CE(20:2)		pmol/mL	501	1780.48	441.694	1730.79	[1454.808 to 2063.161]	0	495.342	550	1594.76	359.487	1563.36	[1352.199 to 1799.482]	0	506.169
CE(20:3)		pmol/mL	501	28949.1	11077.7	26987.6	[21586.539 to 34447.055]	0	8315.05	550	34254.6	11089.9	33554.2	[25624.964 to 41072.949]	0	9658.15
CE(20:4)		pmol/mL	501	73917.1	43632.6	63987.6	[44589.234 to 90212.273]	0	10903.1	550	73011.3	37874.9	66778.9	[45323.685 to 92781.207]	0	8279.41
CE(20:5)		pmol/mL	501	5126.83	4855.77	3834.6	[2230.754 to 6343.605]	0	289.351	550	9393.96	7389.84	7461.88	[4296.884 to 12448.146]	0	592.222
CE(22:0)		pmol/mL	501	263.258	92.036	245.035	[201.181 to 305.069]	0	66.9637	550	238.22	74.7609	229.61	[186.561 to 278.463]	0	91.7537
CE(22:1)		pmol/mL	501	269.72	100.449	247.873	[203.571 to 311.64]	0	93.8265	550	217.016	64.8122	205.919	[171.154 to 254.36]	0	87.7089
CE(22:4)		pmol/mL	501	1330.66	512.118	1287.9	[969.538 to 1638.773]	0	314.156	550	1387	498.747	1357.17	[1015.895 to 1713.886]	0	273.902
CE(22:5) (n3)		pmol/mL	501	2876.78	1582.92	2563.73	[1752.838 to 3646.087]	0	256.917	550	2251.96	1246.12	2005.18	[1350.377 to 2827.291]	0	403.701
CE(22:5) (n6)		pmol/mL	501	3575.08	1400.85	3379.02	[2571.435 to 4273.144]	0	875.03	550	4003.61	1479.02	3795.3	[2955.831 to 4899.614]	0	656.844
CE(22:6)		pmol/mL	501	76683.6	41371	71166.7	[46669.164 to 96152.438]	0	6157.88	550	57747.6	30866.2	52623.3	[35412.515 to 74927.586]	0	9057.9
CE(24:0)		pmol/mL	501	279.05	89.2959	264.777	[215.167 to 324.115]	0	110.152	550	244.43	64.1152	235.272	[199.739 to 279.385]	0	122.79
CE(24:1)		pmol/mL	501	320.557	108.898	297.191	[246.956 to 368.16]	0	109.648	550	265.122	73.5489	255.901	[211.232 to 306.268]	0	110.725
CE(24:4)		pmol/mL	501	435.946	245.365	383.29	[265.913 to 550.901]	0	73.9512	550	179.572	85.1937	159.729	[124.914 to 210.848]	0	27.7876
CE(24:5)		pmol/mL	501	514.358	310.779	436.461	[302.487 to 659.164]	0	97.297	550	226.35	112.378	201.838	[154.974 to 273.656]	0	41.0408
CE(24:6)		pmol/mL	501	59.7492	28.2869	54.8564	[39.683 to 74.605]	0	13.1563	550	105.77	66.8553	89.1641	[61.448 to 130.749]	0	11.5606
COH		pmol/mL	501	531326	88340.8	529545	[477816.28 to 583948.88]	0	217399	550	512929	83142.4	509232	[463204.973 to 559324.958]	0	239510
DE(16:0)		pmol/mL	501	114.615	39.5197	108.639	[87.368 to 136.078]	0	40.2849	550	100.884	36.2628	96.0195	[75.432 to 121.348]	0	19.01
DE(18:1)		pmol/mL	501	1073.57	293.545	1012.14	[870.87 to 1234.414]	0	486.917	550	985.824	273.018	965.196	[786.723 to 1145.778]	0	366.279
DE(18:2)		pmol/mL	501	6493.47	3234.16	5889.69	[4078.57 to 8298.141]	0	1164.1	550	4871.87	2506.22	4484.4	[2965.841 to 6290.441]	0	804.931
DE(20:4)		pmol/mL	501	897.275	645.727	717.562	[487.183 to 1115.734]	0	40.7961	550	691.517	438.153	585.747	[385.552 to 881.963]	0	55.5416
DE(20:5)		pmol/mL	501	202.132	167.405	150.766	[91.491 to 254.729]	0	17.185	550	260.935	172.174	226.533	[135.502 to 335.477]	0	34.737
DE(22:6)		pmol/mL	501	551.422	359.558	464.621	[294.407 to 718.632]	0	23.0101	550	341.131	203.261	290.129	[200.245 to 432.183]	0	35.9159
FA(14:0)		pmol/mL	501	7819.2	5744.53	6486	[5198.291 to 8328.931]	0	2890.24	550	7728.64	5644.65	5945.57	[4889.95 to 8493.077]	0	3011.93
FA(15:0)		pmol/mL	501	5290.06	920.31	5166.56	[4771.05 to 5597.192]	0	3725.38	550	5736.11	981.86	5558.74	[5148.808 to 6069.338]	0	3578.41
FA(16:0)		pmol/mL	501	121550	46648.7	109916	[90810.555 to 140025.98]	0	56319.2	550	112940	44266.9	99834.4	[83048.946 to 132274.533]	0	55623.3
FA(16:1)		pmol/mL	501	12341	9607.69	9676.87	[6887.163 to 14529.847]	0	3640.02	550	10896.6	8086.93	8435.75	[6468.569 to 12496.744]	0	3246.5
FA(16:2)		pmol/mL	501	2812.54	313.516	2795.93	[2595.29 to 2996.974]	0	1974.88	550	2857.87	330.068	2842.4	[2632.722 to 3089.62]	0	1913.12
FA(17:0)		pmol/mL	501	5997.06	1356.23	5732.24	[5091.559 to 6557.129]	0	3799.05	550	6304.83	1143.98	6074.86	[5579.432 to 6740.899]	0	4239.02
FA(17:1)		pmol/mL	501	3012.85	930.387	2833.09	[2451.539 to 3364.117]	0	1642.35	550	3165.55	763.182	2996.28	[2671.735 to 3485.482]	0	1781.29
FA(18:0)		pmol/mL	501	136221	18128.7	132949	[123925.7 to 144207.42]	0	105727	550	135687	13955.8	133409	[127042.77 to 142089.78]	0	103754
FA(18:1)		pmol/mL	501	279078	159837	242148	[178475.45 to 344894.31]	0	50591.6	550	205856	153898	167995	[106952.568 to 261069.283]	0	37319.4
FA(18:2)		pmol/mL	501	120897	83615.8	95157.9	[64938.953 to 150907.67]	0	21814.6	550	88163.1	90242.6	61257.9	[36471.03 to 109089.595]	0	12414.5
FA(18:3)		pmol/mL	501	8936.9	4666.23	7647.73	[5992.981 to 10171.266]	0	3398.79	550	8263.01	5462.75	6369.52	[4823.266 to 9925.092]	0	2466.67
FA(20:2)		pmol/mL	501	3745.16	863.851	3575.62	[3176.518 to 4163.894]	0	2139.86	550	3393.19	627.698	3280.31	[2957.482 to 3702.248]	0	2166.66
FA(20:3)		pmol/mL	501	5639.63	1808.37	5239.6	[4420.107 to 6376.314]	0	2760.86	550	5195.45	1311.09	4895.38	[4376.379 to 5639.36]	0	3218.89
FA(20:4)		pmol/mL	501	14473.6	5426.18	13345.2	[10727.752 to 16692.664]	0	4680.46	550	11688.3	3717.14	10822.3	[9281.331 to 13301.053]	0	5530.7
FA(20:5)		pmol/mL	501	3023	637.919	2929.17	[2619.025 to 3290.177]	0	1825.49	550	3075.46	465.163	3025.1	[2785.239 to 3306.077]	0	2029.24
FA(22:4)		pmol/mL	501	4168.6	1466.77	3819.68	[3201.636 to 4772.871]	0	1926.93	550	3492.86	977.475	3225.58	[2842.647 to 3880.63]	0	1996.63
FA(22:5)		pmol/mL	501	5238.62	2695.2	4507.22	[3599.59 to 6075.73]	0	2373.19	550	4612.87	1727.76	4127.19	[3567.898 to 5155.719]	0	2453.2
FA(22:6)		pmol/mL	501	17743.8	9119.01	15487.4	[11921.251 to 20869.75]	0	5045.66	550	13074.2	5849.29	11245.6	[9312.412 to 14795.784]	0	5011.97
AC(12:0)		pmol/mL	501	27.8978	13.1993	26.1507	[18.637 to 34.331]	0	3.74023	550	17.3469	11.0902	14.7825	[9.209 to 21.988]	0	1.95396
AC(13:0)		pmol/mL	501	5.4879	4.30431	4.65984	[2.616 to 7.351]	0	0.184601	550	4.00578	2.89734	3.27543	[2.135 to 5.153]	0	0.195652
AC(14:0)		pmol/mL	501	8.27853	4.23387	7.37285	[5.291 to 10.33]	0	1.00783	550	6.90009	3.83775	5.89405	[4.1 to 8.689]	0	1.17765
AC(14:1)		pmol/mL	501	31.1575	15.0664	29.3043	[19.937 to 39.734]	0	3.78514	550	18.7232	12.2021	15.9892	[10.144 to 23.649]	0	2.46673
AC(14:2)		pmol/mL	501	18.1978	7.00685	17.251	[13.397 to 22.225]	0	3.98823	550	11.8582	7.51271	10.0412	[6.565 to 15.075]	0	1.36685
AC(15:0) (a)		pmol/mL	501	2.3766	1.66005	2.14664	[0.938 to 3.463]	0	0.187815	550	3.06759	1.78551	2.72401	[1.87 to 3.782]	0	0.153298
AC(15:0) (b)		pmol/mL	501	1.89548	1.19347	1.69615	[0.922 to 2.526]	0	0.282768	550	2.74491	1.77133	2.19136	[1.639 to 3.147]	0	0.394432
AC(16:0)		pmol/mL	501	121.887	49.9637	112.192	[85.835 to 147.241]	0	23.5049	550	108.165	49.749	92.7321	[72.576 to 133.083]	0	31.2869
AC(16:1)		pmol/mL	501	15.6564	7.80666	14.2207	[10.044 to 19.008]	0	2.11165	550	11.5644	6.7436	9.62472	[6.957 to 14.908]	0	2.0037
AC(17:0) (a)		pmol/mL	501	2.67965	1.76639	2.36422	[1.142 to 3.614]	0	0.490479	550	3.35115	1.85721	2.92725	[2.144 to 4.018]	0	0.552951
AC(17:0) (b)		pmol/mL	501	2.87549	1.37793	2.61905	[1.748 to 3.606]	0	0.894692	550	3.16055	1.34902	2.80952	[2.285 to 3.737]	0	1.10729
AC(18:0)		pmol/mL	501	16.984	9.0484	15.0838	[10.212 to 21.441]	0	2.21869	550	14.7078	7.87194	12.3991	[9.193 to 17.939]	0	4.10996
AC(18:1)		pmol/mL	501	110.89	71.1871	85.0323	[64.453 to 144.486]	0	11.5748	550	84.7218	64.1424	57.6904	[40.264 to 116.772]	0	8.59798
AC(18:2)		pmol/mL	501	25.6373	22.9189	16.4712	[12.084 to 31.21]	0	4.63	550	19.1184	18.1172	11.5289	[7.908 to 24.354]	0	2.80764
DG(14:0_16:0)		pmol/mL	501	2122.43	2010.79	1497.69	[1009.762 to 2525.714]	0	326.761	550	2724.69	3467.97	1794.8	[1109.141 to 3233.745]	0	184.051
DG(14:0_18:2)		pmol/mL	501	3142.88	3564.43	2398.15	[1483.576 to 3722.019]	0	392.794	550	2777.41	2538.74	2054.34	[1230.957 to 3542.598]	0	341.394
DG(16:0_16:0)		pmol/mL	501	12891.6	7914.74	10953.6	[7704.004 to 15749.206]	0	2961.87	550	14840.1	10839.5	12088.3	[8504.035 to 17620.656]	0	3139.22
DG(16:0_16:1)		pmol/mL	501	2879.1	1633.12	2396.67	[1784.016 to 3545.33]	0	577.067	550	3219.86	1741.18	2798.08	[2038.084 to 3979.708]	0	541.805
DG(16:0_18:1)		pmol/mL	501	60718.4	38977.7	51035.4	[35130.176 to 76430.742]	0	11258.2	550	54764.3	32171	45880.8	[32417.45 to 69637.953]	0	10817
DG(16:0_18:2)		pmol/mL	501	17524.9	10153.7	15031.2	[10585.865 to 22179.965]	0	2948.91	550	14934.5	8649.63	12738.5	[8665.116 to 19347.329]	0	2317.53
DG(16:0_20:4)		pmol/mL	501	2367.41	1913.26	1856.7	[1041.844 to 3176.712]	0	230.667	550	1641.49	922.531	1390	[1019.806 to 2027.039]	0	370.632
DG(16:0_22:5)		pmol/mL	501	473.238	325.12	390.514	[239.327 to 613.413]	0	57.1039	550	495.927	257.908	444.273	[313.844 to 627.07]	0	94.4873
DG(16:0_22:6)		pmol/mL	501	1234.88	870.992	1043.89	[636.484 to 1577.756]	0	113.992	550	1005.33	729.587	819.313	[560.283 to 1187.936]	0	139.58
DG(16:1_18:1)		pmol/mL	501	4884.2	2490.68	4269.94	[3130.014 to 5944.428]	0	1289.36	550	5706.14	2961.89	4966	[3608.481 to 7105.675]	0	1353.56
DG(18:0_18:1)		pmol/mL	501	17975.7	10032	15696.8	[11099.566 to 22074.297]	0	1084.43	550	17724	11062.9	15031	[10477.025 to 21465.499]	0	2554.16
DG(18:0_18:2)		pmol/mL	501	7951.44	4694.22	6718.47	[4781.873 to 9889.708]	0	715.135	550	7871.95	4897.11	6825.25	[4418.547 to 9926.844]	0	938.089
DG(18:0_20:4)		pmol/mL	501	1951.02	1136.96	1594.76	[1160.789 to 2421.648]	0	181.958	550	1822.48	1207.14	1500.54	[1067.48 to 2156.997]	0	408.528
DG(18:0_22:6)		pmol/mL	501	1786.39	359.656	1748.84	[1581.074 to 1945.921]	0	1078.75	550	1770.76	367.462	1729.83	[1548.978 to 1942.546]	0	1010.87
DG(18:1_18:1)		pmol/mL	501	79598	44189.9	68935.5	[48873.461 to 99993.977]	0	14129	550	72150.1	42459.5	61769.2	[43410.234 to 88924.209]	0	12799.9
DG(18:1_18:2)		pmol/mL	501	44615	28660.1	37380.3	[24811.137 to 55765.063]	0	4549.75	550	35738.9	24028.3	29661.2	[20364.892 to 44654.294]	0	5221.77
DG(18:1_18:3)		pmol/mL	501	4636.69	3091.2	3789.69	[2545.457 to 5776.503]	0	706.597	550	4749.92	3401.58	3858.19	[2485.215 to 5845.102]	0	641.244
DG(18:1_20:3)		pmol/mL	501	1910.17	880.813	1749.14	[1299.387 to 2343.109]	0	495.853	550	2509.32	1323.08	2207.61	[1590.968 to 3048.169]	0	610.315
DG(18:1_20:4)		pmol/mL	501	5214.25	2318.57	4805.9	[3626.619 to 6296.241]	0	1139.01	550	4284.96	1939	3928.67	[2928.906 to 5176.254]	0	932.316
DG(18:1_20:5)		pmol/mL	501	865.299	541.695	728.282	[526.429 to 1059.645]	0	89.2105	550	924.352	474.457	818.521	[595.119 to 1116.83]	0	203.333
DG(18:1_22:5)		pmol/mL	501	1114.53	517.986	1017.17	[733.585 to 1383.941]	0	230.246	550	1215.05	508.877	1121.42	[850.373 to 1474.129]	0	258.657
DG(18:1_22:6)		pmol/mL	501	2463.72	1511.85	2223	[1369.538 to 3162.086]	0	230.097	550	1944.7	1257.85	1621.88	[1109.79 to 2424.527]	0	214.906
DG(18:2_18:2)		pmol/mL	501	9218.53	9596.52	6136.56	[4065.848 to 11259.196]	0	350.835	550	7409.34	8713.08	4820.95	[3164.791 to 8322.618]	0	794.932
DG(18:2_20:4)		pmol/mL	501	2391.19	1145.27	2133.82	[1594.037 to 2889.229]	0	583.302	550	1896.07	1120.13	1618.57	[1160.622 to 2423.001]	0	273.436
DG(18:2_22:6)		pmol/mL	501	623.707	400.682	545.859	[337.359 to 807.401]	0	49.187	550	455.968	343.248	368.571	[233.528 to 565.112]	0	33.7837
TG(48:0) [SIM]		pmol/mL	501	10627.6	6273.64	9144.39	[6078.25 to 13925.244]	0	1821.02	550	16324.6	11719.7	13085	[7929.972 to 21533.747]	0	1779.87
TG(48:1) [SIM]		pmol/mL	501	39426.1	19601	36316	[25091.09 to 49846.629]	0	7403.2	550	42607.2	23400.8	39158	[26344.115 to 53403.744]	0	6218.23
TG(48:2) [SIM]		pmol/mL	501	54777	27871.1	52460.5	[34839.238 to 70184.266]	0	8197.78	550	44394.3	26674.9	39553.6	[24955.59 to 58734.145]	0	6594.1
TG(48:3) [SIM]		pmol/mL	501	44883.5	36309.8	35388	[19793.059 to 58914.137]	0	3991.75	550	25369.9	24495.8	17781	[10230.809 to 30804.863]	0	2866.61
TG(49:1) [SIM]		pmol/mL	501	7240.47	5397.9	6022.04	[2939.786 to 9964.727]	0	883.676	550	14327.4	11528.6	11310.7	[6650.843 to 18485.303]	0	1016.58
TG(50:0) [SIM]		pmol/mL	501	12111	9011.89	9656.19	[5274.897 to 16713.504]	0	1553.76	550	16274.6	11790.4	12455.6	[7490.225 to 23228.707]	0	1620.94
TG(50:1) [SIM]		pmol/mL	501	54887.7	18248.7	53841.7	[42195.563 to 66973.328]	0	15333.9	550	59188.8	20558.3	57100.4	[46518.168 to 69001.28]	0	12804.6
TG(50:2) [SIM]		pmol/mL	501	64711.3	16612.9	63618.6	[53692.879 to 75185.555]	0	25539.6	550	68220.7	18523.8	67119.2	[56890.229 to 77092.567]	0	24298.9
TG(50:3) [SIM]		pmol/mL	501	48377.1	15503.7	47180.7	[38563.898 to 58650.242]	0	14198.9	550	47331.5	18116.4	46247	[34703.951 to 57706.134]	0	9050.64
TG(50:4) [SIM]		pmol/mL	501	21451.8	12042.4	18932.4	[12711.354 to 28054.947]	0	3095.86	550	18675.8	11903.7	15560.1	[10361.233 to 24814.859]	0	2039.68
TG(51:0) [SIM]		pmol/mL	501	16090.4	1698.74	15898.2	[14912.923 to 17051.314]	0	11415.4	550	16694.2	1897.08	16604.6	[15424.928 to 17671.65]	0	11723.1
TG(51:1) [SIM]		pmol/mL	501	7417.81	6465.73	5606.48	[2454.754 to 10320.749]	0	809.649	550	10836.6	7725.36	9036.34	[5548.416 to 13815.602]	0	893.544
TG(51:2) [SIM]		pmol/mL	501	11311.4	7315.5	10243.4	[5296.195 to 15749.096]	0	1985.66	550	17136.1	9345.15	15831.3	[10926.381 to 21659.769]	0	2570.82
TG(52:1) [SIM]		pmol/mL	501	51599.4	29795.2	47646.7	[27802.387 to 68221.789]	0	8614.14	550	47328.5	23994.1	43276	[30811.387 to 59865.21]	0	8931.67
TG(52:2) [SIM]		pmol/mL	501	131573	22030.4	132263	[115739.26 to 145036.02]	0	65223.7	550	126138	22954.2	123525	[111643.32 to 137501.748]	0	79917.9
TG(52:3) [SIM]		pmol/mL	501	121963	21613.1	120077	[106627.08 to 134769.39]	0	47251.1	550	114148	23547	112772	[98981.154 to 127363.373]	0	46120.3
TG(52:4) [SIM]		pmol/mL	501	81410.8	21643.3	78987.1	[67443.148 to 95645.813]	0	18320.9	550	74470	25423.3	73978.9	[58737.912 to 87153.248]	0	13326.5
TG(52:5) [SIM]		pmol/mL	501	23581.2	10487.3	22015.6	[15730.505 to 29866.74]	0	3934.36	550	22307.4	11531.9	19621.3	[14267.449 to 29144.652]	0	3051.9
TG(53:2) [SIM]		pmol/mL	501	6672.45	4313.68	5696.15	[3387.871 to 8751.44]	0	962.78	550	8824.15	4326.08	8076.51	[6002.742 to 10890.134]	0	1455.92
TG(54:0) [SIM]		pmol/mL	501	1154.21	1027.22	873.413	[538.182 to 1332.394]	0	273.808	550	1272.65	1082.45	925.875	[582.509 to 1568.945]	0	218.113
TG(54:1) [SIM]		pmol/mL	501	8566.2	8317.94	6310.41	[3710.153 to 10700.029]	0	1001.05	550	8051.24	8983.26	5695.35	[3657.431 to 9963.015]	0	1153.5
TG(54:2) [SIM]		pmol/mL	501	42408.9	18068.1	41143.6	[29350.803 to 51742.926]	0	7804.15	550	36075.2	17020	33020.5	[24534.789 to 44635.528]	0	8459.89
TG(54:3) [SIM]		pmol/mL	501	65288.8	22303.8	61108	[49502.207 to 76649.477]	0	21055.3	550	52116.2	19770.9	48471.3	[38878.933 to 60642.949]	0	18823.8
TG(54:4) [SIM]		pmol/mL	501	72486.6	24712.2	66793.6	[54845.707 to 85956.656]	0	21464	550	56300.3	22944.7	51329.2	[41504.245 to 66221.829]	0	15071.5
TG(54:5) [SIM]		pmol/mL	501	61491.5	24527.2	56384.7	[43373.148 to 74888.063]	0	11574.7	550	49654.4	27875	42521.9	[32820.345 to 58994.901]	0	10144.4
TG(54:6) [SIM]		pmol/mL	501	30681	14532.8	27359.5	[20014.465 to 37473.234]	0	6324.31	550	27424.9	21490.3	21659.5	[16115.596 to 31074.977]	0	5124.49
TG(54:7) [SIM]		pmol/mL	501	8323.95	3844.22	7512.06	[5581.324 to 10472.441]	0	1718.54	550	7914.6	5414.6	6363.13	[4857.596 to 9440.619]	0	1524.4
TG(56:6) [SIM]		pmol/mL	501	16131.3	4426.55	15609.2	[12973.388 to 18521.076]	0	5807.23	550	14546.2	4077.79	14267.3	[11882.67 to 17002.064]	0	5644.87
TG(56:7) [SIM]		pmol/mL	501	18137.6	6796.9	17618.1	[13081.141 to 21867.945]	0	4500.79	550	15422.4	5426.26	14756.3	[11745.715 to 18281.426]	0	4024.26
TG(56:8) [SIM]		pmol/mL	501	8777.15	3965.16	8072.97	[6029.366 to 11025.876]	0	2031.81	550	7005.73	3290.8	6322.72	[4786.387 to 8546.53]	0	1694.16
TG(56:9) [SIM]		pmol/mL	501	2116.57	768.882	1981.62	[1576.594 to 2453.826]	0	669.29	550	2027.41	902.694	1820.22	[1475.029 to 2345.499]	0	723.78
TG(58:10) [SIM]		pmol/mL	501	1705.07	811.074	1583.16	[1146.722 to 2098.672]	0	356.894	550	1353	651.782	1200.02	[961.85 to 1614.848]	0	431.731
TG(58:8) [SIM]		pmol/mL	501	4053.21	1732.68	3820.67	[2866.912 to 4978.169]	0	922.957	550	3100.15	1267.29	2883.15	[2261.333 to 3670.411]	0	941.996
TG(58:9) [SIM]		pmol/mL	501	3386.54	1584.91	3111.8	[2276.757 to 4207.969]	0	723.046	550	2574.37	1311.05	2304.97	[1768.384 to 3077.499]	0	707.19
TG(48:0) [NL-16:0]		pmol/mL	501	2039.54	1237.33	1796.16	[1138.938 to 2635.054]	0	243.227	550	3126.55	2219.77	2509.66	[1559.684 to 4052.044]	0	294.993
TG(48:0) [NL-18:0]		pmol/mL	501	1053.55	1099.52	671.326	[328.432 to 1447.53]	0	85.3077	550	1540.98	1493.67	1040.02	[528.48 to 2101.092]	0	93.3071
TG(48:1) [NL-16:1]		pmol/mL	501	469.709	329.737	395.966	[210.769 to 622.253]	0	61.775	550	589.9	372.706	494.704	[340.849 to 737.667]	0	74.1314
TG(48:1) [NL-18:1]		pmol/mL	501	10286.9	6248.16	9084.42	[5888.578 to 13354.988]	0	1167.26	550	10779.4	6894.35	9533.05	[6000.445 to 13987.908]	0	987.107
TG(48:2) [NL-14:0]		pmol/mL	501	3982.63	2309.31	3536.91	[2239.632 to 5188.895]	0	585.866	550	4268.93	2708.93	3887.43	[2330.355 to 5618.318]	0	426.859
TG(48:2) [NL-14:1]		pmol/mL	501	270.327	234.468	204.35	[93.44 to 386.474]	0	26.6486	550	422.058	378.835	303.871	[161.557 to 556.213]	0	20.4011
TG(48:2) [NL-16:1]		pmol/mL	501	2596.64	1639.46	2231.9	[1214.405 to 3601.508]	0	316.371	550	3134.83	1881.11	2756.49	[1847.743 to 3958.918]	0	479.112
TG(48:2) [NL-18:2]		pmol/mL	501	5372.05	2869.65	4962.41	[3242.73 to 6975.028]	0	567.576	550	5477.49	3337.72	4884.57	[3064.092 to 7221.981]	0	573.064
TG(48:3) [NL-14:0]		pmol/mL	501	392.326	353.548	280.897	[139.644 to 516.06]	0	26.2747	550	405.532	392.175	274.076	[133.288 to 542.378]	0	23.0455
TG(48:3) [NL-16:1]		pmol/mL	501	909.24	670.225	675.515	[450.093 to 1179.349]	0	102.217	550	982.938	879.391	739.653	[492.797 to 1184.623]	0	166.161
TG(48:3) [NL-18:3]		pmol/mL	501	759.672	632.765	590.243	[320.711 to 993.905]	0	46.759	550	915.214	853.222	635.075	[342.188 to 1262.601]	0	34.8489
TG(49:1) [NL-16:1]		pmol/mL	501	60.4771	35.3615	51.1017	[36.816 to 77.804]	0	8.78532	550	80.1511	47.4097	69.2243	[47.254 to 99.542]	0	14.2215
TG(49:1) [NL-17:1]		pmol/mL	501	252.578	191.704	196.962	[103.367 to 344.921]	0	34.7852	550	454.007	382.717	343.116	[196.192 to 591.094]	0	36.6329
TG(50:0) [NL-18:0]		pmol/mL	501	1580.81	1489.66	1158.9	[531.208 to 2101.519]	0	105.904	550	2055.03	1725.21	1483.65	[796.043 to 2849.325]	0	115.602
TG(50:1) [NL-14:0]		pmol/mL	501	238.826	170.753	188.804	[117.317 to 323.186]	0	24.5315	550	265.436	213.208	210.121	[120.32 to 337.897]	0	31.8864
TG(50:1) [NL-16:0]		pmol/mL	501	21903	7482.09	21503.4	[17127.434 to 26271.5]	0	5511.59	550	23668.2	8317	22818	[18280.946 to 27950.68]	0	5528.7
TG(50:1) [NL-18:1]		pmol/mL	501	16092.7	5914.17	15415.5	[12012.081 to 19720.395]	0	4358.54	550	17161.2	6217.43	16401.6	[13414.094 to 19928.65]	0	4061.25
TG(50:2) [NL-14:0]		pmol/mL	501	1516.58	714.813	1387.93	[1028.298 to 1928.393]	0	164.804	550	1317.34	626.539	1238.15	[888.583 to 1658.346]	0	154.267
TG(50:2) [NL-16:1]		pmol/mL	501	4230.14	1969.71	4023.22	[2579.598 to 5546.294]	0	1110.98	550	5112.65	1945.9	4935.99	[3753.808 to 6231.957]	0	1218.83
TG(50:2) [NL-18:1]		pmol/mL	501	17233.6	5947.63	16625.6	[12894.306 to 20805.111]	0	5490.07	550	16855.6	5883.49	16504.4	[12875.49 to 19948.276]	0	4461.66
TG(50:2) [NL-18:2]		pmol/mL	501	5628.55	1833.3	5559.51	[4429.898 to 6742.958]	0	1550.33	550	5893.29	1948.38	5671.74	[4676.273 to 6914.639]	0	1181.35
TG(50:3) [NL-14:0]		pmol/mL	501	4940.04	2225.25	4691.61	[3346.564 to 6294.987]	0	360.618	550	4001.12	2128.27	3776.07	[2510.111 to 5040.783]	0	317.367
TG(50:3) [NL-14:1]		pmol/mL	501	141.645	96.2555	118.307	[71.659 to 184.618]	0	14.1594	550	153.626	130.36	123.465	[79.071 to 193.3]	0	15.7737
TG(50:3) [NL-16:1]		pmol/mL	501	3442.89	1582.28	3216.9	[2249.527 to 4435.216]	0	855.365	550	4001.83	1621.66	3760.93	[2825.82 to 4845.76]	0	980.013
TG(50:3) [NL-18:2]		pmol/mL	501	9271	3192.4	9107.87	[7214.815 to 11215.662]	0	2463.98	550	8476.62	3383.73	8186.08	[6105.809 to 10407.704]	0	1396.02
TG(50:3) [NL-18:3]		pmol/mL	501	839.877	419.685	751.88	[559.073 to 1060.463]	0	126.632	550	1082.17	586.66	965.607	[689.874 to 1353.369]	0	163.401
TG(50:4) [NL-14:0]		pmol/mL	501	899.273	742.597	681.402	[380.203 to 1208.159]	0	34.9846	550	654.344	603.608	482.646	[257.116 to 860.566]	0	18.83
TG(50:4) [NL-18:3]		pmol/mL	501	1359.93	909.665	1152.66	[712.508 to 1778.87]	0	165.828	550	1383.25	1004.76	1139.21	[653.646 to 1846.689]	0	119.231
TG(50:4) [NL-20:4]		pmol/mL	501	359.651	240.881	314.961	[182.943 to 471.804]	0	34.5811	550	333.607	220.17	278.688	[182.176 to 435.058]	0	30.0418
TG(51:0) [NL-16:0]		pmol/mL	501	86.2716	110.772	45.5889	[19.179 to 104.216]	0	6.03794	550	152.172	179.058	89.999	[42.123 to 197.061]	0	7.9886
TG(51:1) [NL-17:0]		pmol/mL	501	426.55	395.145	306.226	[128.08 to 609.689]	0	37.0253	550	563.736	443.694	460.314	[283.005 to 732.254]	0	32.7836
TG(51:2) [NL-15:0]		pmol/mL	501	239.629	162.288	207.828	[114.167 to 315.12]	0	25.4976	550	410.226	264.894	357.718	[242.964 to 522.187]	0	33.5835
TG(51:2) [NL-17:0]		pmol/mL	501	847.798	570.324	750.347	[347.245 to 1197.575]	0	122.579	550	1216.8	658.573	1084.28	[736.868 to 1544.356]	0	170.35
TG(51:2) [NL-17:1]		pmol/mL	501	845.866	570.798	748.036	[346.382 to 1196.154]	0	120.088	550	1215.32	659.544	1082.5	[735.067 to 1542.944]	0	168.726
TG(52:1) [NL-18:0]		pmol/mL	501	13184.6	9090.6	11150	[6123.837 to 18005.563]	0	1545.03	550	11244.3	6418.72	9871.77	[6867.628 to 14247.119]	0	1726.76
TG(52:1) [NL-18:1]		pmol/mL	501	5517.61	4378.69	4433.57	[2201.834 to 7716.698]	0	466.865	550	4450.32	2786.44	3863.64	[2455.505 to 5844.949]	0	483.637
TG(52:2) [NL-16:0]		pmol/mL	501	11165.8	2755.95	10905.4	[9214.616 to 12966.85]	0	2725.23	550	10832.4	2882.17	10448.5	[8902.315 to 12384.636]	0	4230.19
TG(52:2) [NL-18:2]		pmol/mL	501	1823.62	959.388	1645.15	[1157.14 to 2280.163]	0	362.633	550	1652.21	713.474	1551.86	[1175.555 to 1981.19]	0	343.229
TG(52:3) [NL-16:1]		pmol/mL	501	858.801	330.221	820.408	[622.734 to 1030.675]	0	251.77	550	888.616	313.126	842.778	[671.449 to 1031.036]	0	302.606
TG(52:3) [NL-18:2]		pmol/mL	501	21851.3	5121.78	21462.9	[18347.482 to 24675.543]	0	4752.25	550	19479.6	5391.44	18843.7	[16158.115 to 22131.773]	0	5516.74
TG(52:4) [NL-16:1]		pmol/mL	501	1070.92	412.339	1007.09	[810.828 to 1282.69]	0	204.828	550	979.13	426.137	911.358	[668.937 to 1230.995]	0	124.885
TG(52:4) [NL-18:2]		pmol/mL	501	18879.3	7097.02	17763.5	[13844.592 to 22697.811]	0	3175.22	550	15961	8344.03	14466.4	[10626.211 to 19005.952]	0	1749.16
TG(52:4) [NL-18:3]		pmol/mL	501	3547.72	1284.62	3456.68	[2573.822 to 4332.566]	0	535.807	550	3660.63	1485.66	3462.26	[2636.383 to 4505.032]	0	578.782
TG(52:5) [NL-18:3]		pmol/mL	501	932.927	645.367	769.872	[482.107 to 1201.121]	0	98.3093	550	851.108	638.241	679.258	[413.582 to 1144.576]	0	35.6608
TG(52:5) [NL-20:4]		pmol/mL	501	613.524	335.382	582.957	[353.517 to 796.064]	0	98.983	550	542.595	260.229	489.426	[357.435 to 670.767]	0	85.8213
TG(52:5) [NL-20:5]		pmol/mL	501	103.856	93.6006	80.1075	[39.918 to 137.439]	0	10.7813	550	126.781	76.2375	110.353	[72.626 to 164.167]	0	11.8451
TG(53:2) [NL-17:1]		pmol/mL	501	36.9456	33.9207	26.8689	[12.865 to 48.171]	0	3.65562	550	45.2912	34.7075	37.1183	[23.182 to 56.603]	0	4.40063
TG(53:2) [NL-18:1]		pmol/mL	501	2203.38	1467	1912.87	[1119.841 to 2879.626]	0	235.953	550	2869.34	1484.66	2578.82	[1887.882 to 3651.719]	0	359.192
TG(54:0) [NL-18:0]		pmol/mL	501	289.671	390.923	158.405	[87.331 to 318.602]	0	33.3499	550	333.264	353.681	210.737	[119.184 to 419.732]	0	31.331
TG(54:1) [NL-18:1]		pmol/mL	501	809.441	974.412	512.931	[280.233 to 960.625]	0	68.5942	550	759.004	1182.48	502.747	[285.558 to 913.567]	0	60.189
TG(54:2) [NL-18:0]		pmol/mL	501	4142.52	2256.41	3707.22	[2489.255 to 5342.945]	0	426.309	550	3392.55	2016.16	3055.31	[2019.502 to 4223.672]	0	466.507
TG(54:2) [NL-20:1]		pmol/mL	501	1146.85	481.678	1095.78	[828.093 to 1405.95]	0	134.198	550	1199.37	516.235	1120.76	[863.189 to 1472.556]	0	296.175
TG(54:3) [NL-18:1]		pmol/mL	501	31282.8	14206.2	27280.5	[22001.611 to 36470.035]	0	7449.55	550	22561.9	10818.3	20313.2	[15542.459 to 25919.38]	0	6959.73
TG(54:3) [NL-18:2]		pmol/mL	501	1271.76	510.665	1188.69	[910.082 to 1528.568]	0	181.244	550	1091.83	504.115	981.399	[746.442 to 1329.869]	0	233.757
TG(54:4) [NL-18:2]		pmol/mL	501	4020.87	2236.61	3421.17	[2554.973 to 4964.825]	0	601.328	550	2849.47	1644.1	2438.1	[1742.552 to 3466.771]	0	463.143
TG(54:4) [NL-20:3]		pmol/mL	501	912.057	363.624	862.407	[656.103 to 1129.261]	0	221.039	550	1048.36	396.412	989.052	[776.091 to 1259.188]	0	298.823
TG(54:5) [NL-18:3]		pmol/mL	501	806.704	525.708	664.166	[418.357 to 1057.628]	0	70.6267	550	688.727	618.673	541.387	[343.767 to 815.587]	0	49.3914
TG(54:5) [NL-20:4]		pmol/mL	501	1856.74	667.272	1771.89	[1427.59 to 2169.824]	0	610.788	550	1533.2	481.111	1489.77	[1189.503 to 1788.669]	0	454.434
TG(54:6) [NL-18:3]		pmol/mL	501	802.581	807.106	506.511	[285.528 to 1061.01]	0	44.4622	550	648.323	960.866	354.866	[191.758 to 680.641]	0	29.6521
TG(54:6) [NL-20:4]		pmol/mL	501	1259.32	441.478	1223.21	[942.345 to 1488.393]	0	292.476	550	1071.02	424.534	1034.22	[763.966 to 1300.255]	0	188.322
TG(54:6) [NL-20:5]		pmol/mL	501	341.641	243.193	289.323	[182.864 to 419.219]	0	46.8466	550	360.06	158.911	332.619	[247.601 to 440.581]	0	69.2727
TG(54:6) [NL-22:6]		pmol/mL	501	577.344	405.137	501.505	[292.241 to 770.454]	0	45.8004	550	521.106	377.457	432.274	[310.247 to 637.667]	0	40.1471
TG(54:7) [NL-20:5]		pmol/mL	501	98.0718	78.1376	77.4222	[48.847 to 125.382]	0	6.70677	550	96.6214	61.7672	80.6905	[54.352 to 122.258]	0	10.2882
TG(54:7) [NL-22:6]		pmol/mL	501	563.958	434.665	456.873	[279.922 to 735.898]	0	23.9215	550	474.116	388.449	377.058	[247.262 to 587.636]	0	22.9615
TG(56:6) [NL-20:4]		pmol/mL	501	329.747	106.413	316.056	[251.129 to 392.117]	0	92.1569	550	260.739	104.208	244.689	[188.723 to 309.392]	0	76.3805
TG(56:6) [NL-22:5](a)		pmol/mL	501	721.741	309.49	695.657	[487.861 to 908.725]	0	166.126	550	748.586	240.85	726.013	[585.655 to 871.966]	0	230.404
TG(56:6) [NL-22:5](b)		pmol/mL	501	740.826	317.865	718.836	[499.277 to 932.341]	0	171.695	550	766.451	246.534	742.73	[596.565 to 888.953]	0	235.591
TG(56:7) [NL-20:4]		pmol/mL	501	771.451	288.351	728.492	[564.107 to 899.248]	0	122.766	550	584.847	298.406	527.547	[397.814 to 701.925]	0	123.148
TG(56:7) [NL-20:5]		pmol/mL	501	71.4702	44.5214	62.6281	[43.909 to 88.597]	0	9.01781	550	71.9599	33.5293	66.1541	[49.316 to 86.942]	0	12.5621
TG(56:7) [NL-22:5](a)		pmol/mL	501	531.545	206.274	508.955	[375.616 to 646.35]	0	147.207	550	521.957	183.878	512.243	[388.59 to 630.428]	0	107.892
TG(56:7) [NL-22:5](b)		pmol/mL	501	534.207	207.073	510.295	[380.236 to 649.092]	0	148.591	550	524.4	184.703	514.265	[391.299 to 633.261]	0	108.912
TG(56:7) [NL-22:6]		pmol/mL	501	2423.1	1411	2226.64	[1390.401 to 3158.767]	0	214.973	550	1871.09	1017.58	1654.5	[1180.529 to 2308.259]	0	252.762
TG(56:8) [NL-20:4]		pmol/mL	501	344.69	171.816	312.566	[229.095 to 424.653]	0	35.9709	550	249.297	177.322	204.184	[144.58 to 299.302]	0	30.553
TG(56:8) [NL-20:5]		pmol/mL	501	69.8409	48.5664	58.3107	[38.1 to 85.528]	0	5.24004	550	62.42	44.2561	51.9407	[35.41 to 76.731]	0	8.6198
TG(56:8) [NL-22:6]		pmol/mL	501	1465.96	910.8	1312.74	[798.156 to 1902.876]	0	122.1	550	1070.22	675.296	904.96	[617.606 to 1355.642]	0	78.8779
TG(56:9) [NL-22:6]		pmol/mL	501	68.8593	53.2347	56.2652	[33.856 to 91.665]	0	2.74104	550	52.5961	40.3348	42.099	[25.927 to 66.123]	0	2.20863
TG(58:10) [NL-22:6]		pmol/mL	501	88.0345	66.2269	70.087	[41.331 to 115.54]	0	7.23389	550	58.0062	55.4557	41.9831	[26.461 to 70.862]	0	4.23816
TG(58:8) [NL-22:6]		pmol/mL	501	317.077	208.483	281.109	[181.117 to 404.439]	0	28.2024	550	204.585	127.342	174.441	[118.321 to 252.521]	0	26.5931
TG(58:9) [NL-22:6]		pmol/mL	501	237.08	172.181	193.213	[122.105 to 306.996]	0	19.5091	550	150.52	126.327	116.632	[74.624 to 191.794]	0	9.20478
TG(O-50:1) [SIM]		pmol/mL	501	991.215	1146.91	743.334	[394.314 to 1219.324]	0	195.81	550	539.363	278.467	465.583	[385.074 to 589.082]	0	129.413
TG(O-50:2) [SIM]		pmol/mL	501	374.955	175.993	341.995	[253.745 to 451.463]	0	142.956	550	283.812	83.2864	269.308	[230.551 to 312.077]	0	126.798
TG(O-50:3) [SIM]		pmol/mL	501	330.071	59.1022	322.276	[295.795 to 362.045]	0	181.071	550	347.2	61.8377	342.382	[306.324 to 377.254]	0	178.332
TG(O-52:0) [SIM]		pmol/mL	501	785.962	5967.97	257.142	[173.886 to 475.997]	0	66.8282	550	246.169	199.679	203.939	[163.227 to 268.651]	0	77.9033
TG(O-52:1) [SIM]		pmol/mL	501	992.148	1900.17	661.101	[228.388 to 1219.932]	0	108.802	550	380.738	260.743	307.495	[250.717 to 402.832]	0	131.735
TG(O-52:2) [SIM]		pmol/mL	501	1252.62	1174.81	963.153	[418.229 to 1730.238]	0	208.77	550	596.085	341.756	493.452	[407.172 to 660.922]	0	163.576
TG(O-54:2) [SIM]		pmol/mL	501	565.371	691.788	386.252	[135.12 to 751.669]	0	72.1552	550	203.701	139.212	159.744	[133.856 to 206.012]	0	81.3621
TG(O-54:3) [SIM]		pmol/mL	501	603.67	267.764	552.45	[398.955 to 729.078]	0	215.371	550	433.986	114.41	405.871	[362.682 to 478.067]	0	229.398
TG(O-54:4) [SIM]		pmol/mL	501	396.975	180.234	376.662	[249.177 to 511.038]	0	105.874	550	391.711	137.357	372.097	[300.203 to 456.949]	0	146.465
TG(O-50:1) [NL-15:0]		pmol/mL	501	28.9182	75.3702	14.9168	[5.268 to 29.591]	0	1.39668	550	9.67936	9.69405	7.11209	[5.323 to 10.637]	0	1.52225
TG(O-50:1) [NL-16:0]		pmol/mL	501	303.811	362.806	219.606	[98.698 to 378.46]	0	24.1214	550	146.022	105.264	117.906	[88.46 to 164.646]	0	26.6238
TG(O-50:1) [NL-17:1]		pmol/mL	501	30.7429	29.3794	24.0723	[14.551 to 38.091]	0	6.09842	550	22.6875	12.7614	20.1332	[15.254 to 25.959]	0	5.75059
TG(O-50:1) [NL-18:1]		pmol/mL	501	341.618	591.256	211.651	[48.176 to 416.871]	0	13.1723	550	106.236	124.202	74.2274	[53.238 to 108.394]	0	19.0178
TG(O-50:2) [NL-16:1]		pmol/mL	501	13.2052	9.0708	11.1859	[7.237 to 16.839]	0	2.59963	550	9.30279	4.63852	8.20577	[6.505 to 10.842]	0	2.24387
TG(O-50:2) [NL-18:1]		pmol/mL	501	43.4127	50.2247	32.121	[8.157 to 62.014]	0	3.5197	550	16.1561	16.8258	11.4187	[8.232 to 16.867]	0	2.19244
TG(O-50:2) [NL-18:2]		pmol/mL	501	23.6055	22.2286	18.6956	[9.939 to 29.42]	0	0.836262	550	14.3793	9.18716	12.324	[8.24 to 17.902]	0	0.451625
TG(O-50:3) [NL-18:2]		pmol/mL	501	1.37107	1.41412	0.894879	[0.409 to 1.868]	0	0.0147993	550	0.926317	1.01779	0.693944	[0.388 to 1.158]	0	0.0418425
TG(O-52:0) [NL-16:0]		pmol/mL	501	35.8911	67.8901	20.9396	[10.898 to 40.737]	0	4.38741	550	20.4897	12.8057	17.5351	[13.591 to 24.266]	0	4.86137
TG(O-52:1) [NL-16:0]		pmol/mL	501	113.164	226.253	62.0605	[16.351 to 135.194]	0	5.95983	550	38.7473	37.3462	28.9439	[20.939 to 41.822]	0	7.16003
TG(O-52:1) [NL-18:1]		pmol/mL	501	449.345	1105.65	226.472	[24.291 to 527.204]	0	6.7891	550	93.207	137.421	53.7574	[37.537 to 89.708]	0	12.2083
TG(O-52:2) [NL-16:0]		pmol/mL	501	101.71	102.142	72.3959	[25.764 to 142.09]	0	2.44205	550	33.9867	31.0161	24.3135	[17.543 to 36.649]	0	4.00709
TG(O-52:2) [NL-17:1]		pmol/mL	501	85.7221	92.0062	63.2047	[21.231 to 118.645]	0	5.10977	550	31.9865	25.8391	24.4916	[17.887 to 34.864]	0	4.83168
TG(O-52:2) [NL-18:1]		pmol/mL	501	448.073	507.383	317.984	[69.733 to 647.676]	0	14.1507	550	118.446	141.914	73.2868	[51.42 to 121.48]	0	11.6642
TG(O-54:2) [NL-17:1]		pmol/mL	501	23.9959	64.128	9.67581	[1.056 to 25.008]	0	0.334699	550	3.56318	5.63333	1.80107	[1.206 to 3.267]	0	0.405414
TG(O-54:2) [NL-18:1]		pmol/mL	501	329.344	578.002	170.273	[16.755 to 424.452]	0	7.43806	550	58.8684	88.3128	28.9181	[21.328 to 54.686]	0	7.75902
TG(O-54:3) [NL-17:1]		pmol/mL	501	9.60249	14.9152	5.09315	[1.099 to 12.244]	0	0.0261634	550	1.97773	2.81934	1.11826	[0.641 to 2.034]	0	0.0420165
TG(O-54:3) [NL-18:1]		pmol/mL	501	155.638	184.384	100.736	[19.504 to 221.253]	0	3.08177	550	34.923	50.0275	18.9591	[13.369 to 32.501]	0	3.7305
TG(O-54:4) [NL-17:1]		pmol/mL	501	5.93008	4.78578	4.59898	[2.87 to 7.51]	0	0.0457051	550	3.50179	2.55613	2.84418	[1.937 to 4.271]	0	0.0698852
TG(O-54:4) [NL-18:2]		pmol/mL	501	17.8267	17.5207	12.3262	[5.615 to 23.252]	0	0.315966	550	6.30245	6.96547	4.25526	[2.376 to 7.805]	0	0.207353
Ubiquinone		pmol/mL	501	15581.4	5988.86	14644.4	[11561.871 to 19054.598]	0	2043.15	550	16069	6259.66	15022.5	[11677.104 to 19235.982]	0	3610.82
CE(18:2) [+OH]		pmol/mL	501	2999.84	2684.23	2486.21	[1782.558 to 3366.348]	0	448.422	550	4427.52	3261.49	3863.95	[2749.109 to 5053.045]	0	605.099
CE(20:4) [+OH]		pmol/mL	501	717.779	304.097	689.219	[496.249 to 881.184]	0	172.895	550	778.855	297.627	730.082	[583.7 to 923.335]	0	163.883
CE(22:6) [+OH]		pmol/mL	501	493.431	201.852	466.723	[378.661 to 596.853]	0	108.177	550	482.838	214.202	457.12	[375.791 to 556.979]	0	147.019
LPC(18:2) [+OH]		pmol/mL	501	11.7161	15.5513	5.34123	[3.706 to 11.795]	0	1.18073	550	9.12902	10.598	4.67404	[3.066 to 10.942]	0	1.38452
LPC(20:4) [+OH]		pmol/mL	501	24.7255	42.5973	4.81441	[2.551 to 20.878]	0	0.171872	550	17.8478	32.2336	3.04617	[1.567 to 20.621]	0	0.107914
LPC(22:6) [+OH]		pmol/mL	501	17.3532	26.5041	5.16587	[3.556 to 16.808]	0	1.58923	550	10.8356	15.2243	3.526	[2.59 to 13.177]	0	1.452
PC(34:2) [+OH]		pmol/mL	501	8.89329	5.95907	7.47882	[5.871 to 9.842]	0	2.57631	550	10.0267	6.82015	8.61621	[6.632 to 11.206]	0	1.956
PC(36:4) [+OH]		pmol/mL	501	45.5866	15.551	43.3211	[34.185 to 53.575]	0	9.59272	550	39.1991	11.312	37.6905	[31.625 to 45.69]	0	12.192
PC(38:6) [+OH]		pmol/mL	501	115.893	61.1677	114.239	[64.002 to 152.081]	0	13.9088	550	161.145	55.0273	163.759	[124.152 to 193.727]	0	26.0254
Measures had their lowest non-zero value (considered as the lower limit of detection for that measure) added to them prior to log-transformation.
